# Supplementary material for: Comprehensive isoform-level analysis reveals the contribution of alternative isoforms to venom evolution and repertoire diversity
Source: HighWire-hosted journal article supplement (doi:10.1101/gr.277707.123), 2023-09-01
Supplement: Supplemental_Dataset.zip [file Supplemental_Dataset_README.docx]

**Supplemental Dataset S1: The GTF annotation file of *Pteromalus puparum* OGS 2.1.**
