# Supplementary material for: Comprehensive isoform-level analysis reveals the contribution of alternative isoforms to venom evolution and repertoire diversity
Source: HighWire-hosted journal article supplement (doi:10.1101/gr.277707.123), 2023-09-01
Supplement: Supplemental_Figs_S1_to_S27.pdf [file Supplemental_Figs_S1_to_S27.pdf]

## Supplemental Figures

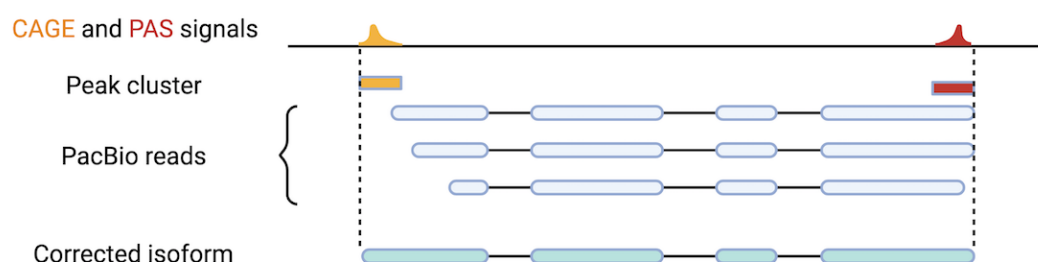

**Supplemental Fig S1. A schematic figure for the correction of ends of isoforms by CAGE and PAS peaks.** Due to incomplete cDNA synthesis or mRNA degradation, the primary isoforms we obtained directly from PacBio Iso-Seq may include some fragments of mature mRNAs. To refine the 5'-end and 3'-end boundaries of transcripts, we analyzed the data as previously described by Sun et al., 2021. In brief, we first identified CAGE and PAS peak clusters that represented reliable TSS and TES signals, respectively. We then corrected the 5'-end and 3'-end of the isoforms obtained from Iso-Seq according to these TSS and TES signals.

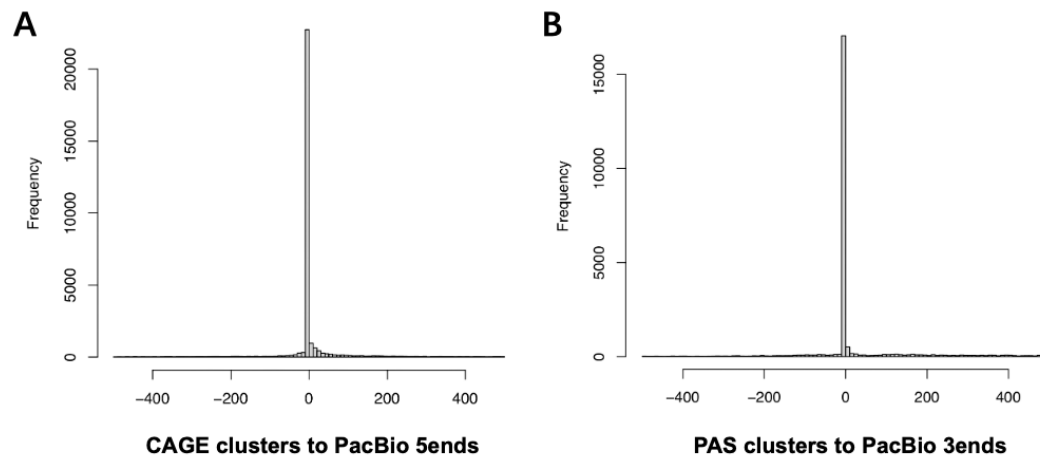

**Supplemental Fig S2. The distances of 5'-end and 3'-end of the isoforms from the PacBio Iso-Seq with peaks identified by CAGE-seq (A) and PAS-seq (B), respectively.**

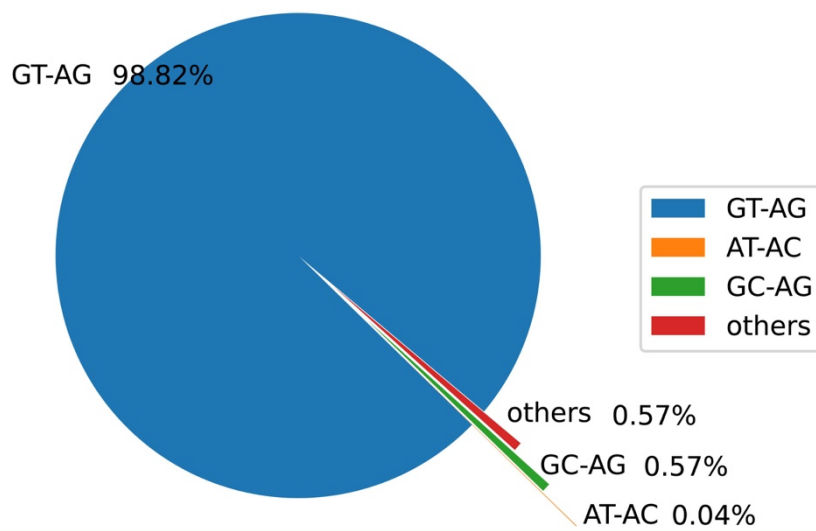

**Supplemental Fig S3. Pie chart showing the percentage of the splicing donor-acceptor di-nucleotide utilization among all transcripts in *P. puparum*.** In total, we found 141,589 GU-AG splice sites, 820 GC-AG splice sites, 53 AU-AC splice sites, and 823 other splice sites.

Longitudinals lacking (*lola*) gene, Scaffold\_4:3,445,865-3,826,020

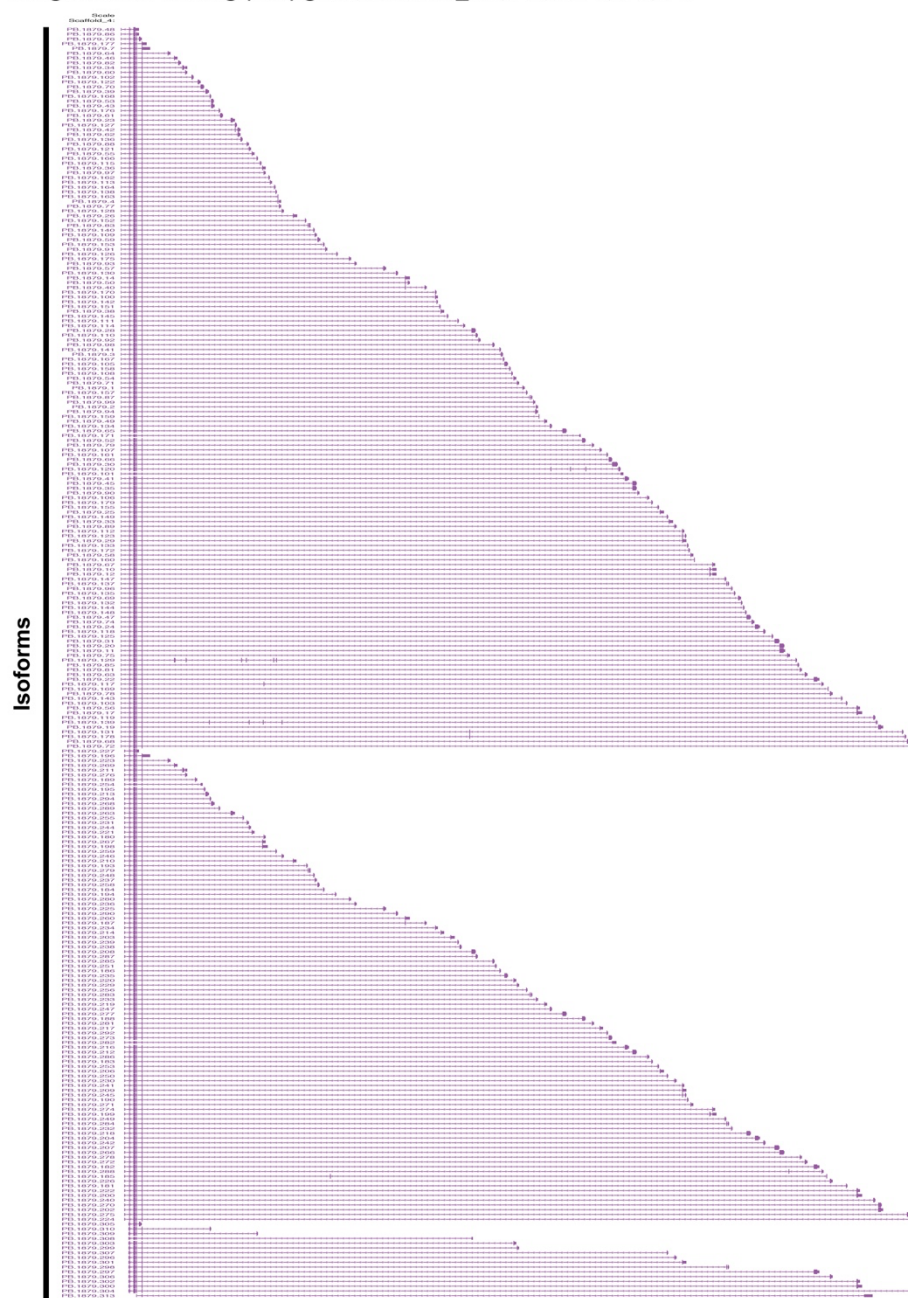

Supplemental Fig S4. Overview of the isoforms of the longitudinals lacking (*lola*) gene in *P. puparum*.



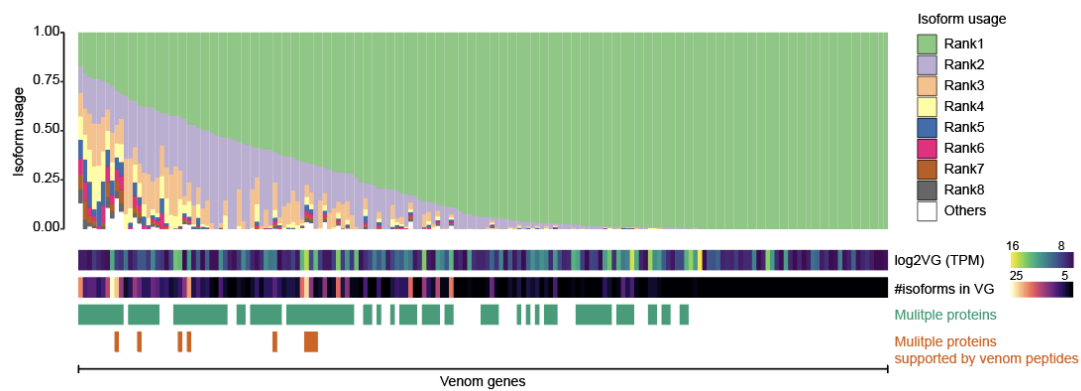

**Supplemental Fig S5. Isoform usage of venom genes.** Only venom gland expressed isoforms were included, and the isoforms with TPM values higher than 1 in at least one repetition of venom gland sample were defined as expressed isoforms. Usages of isoforms in each gene were ranked (Rank1 represented the most used isoform in a gene) and showed in different colors. Venom genes with various isoforms that encoded multiple proteins were indicated, and the genes with multiple venom proteins supported by mass spectrometry-based proteomics were highlighted.

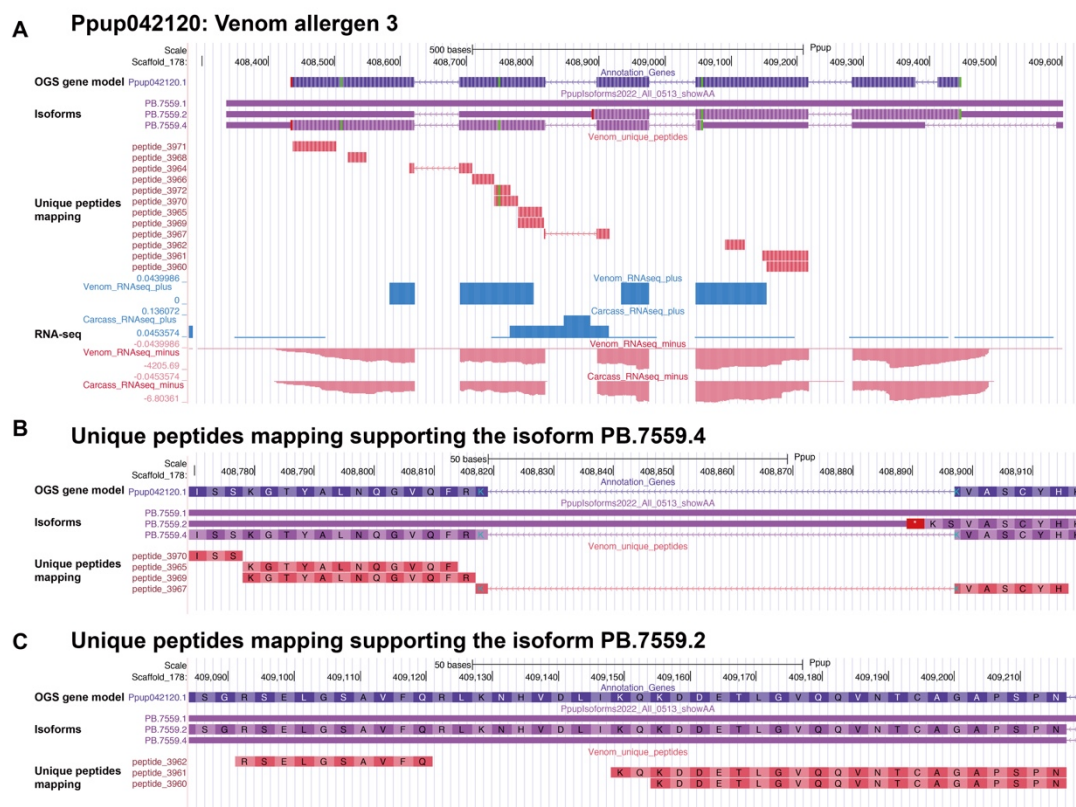

**Supplemental Fig S6. Venom allergen 3 gene produces diverse venom proteins through alternative splicing, which supported by mass spectrometry.** (A) Genome browser view of the venom allergen 3 gene. From top to bottom, OGS gene model, Isoforms, Unique venom peptides mapping results, RNA-seq. (B) Zoomed view showing the peptide supporting information of the venom PB.7559.4 protein. (C) Zoomed view showing the peptide supporting information of the venom PB.7559.2 protein.

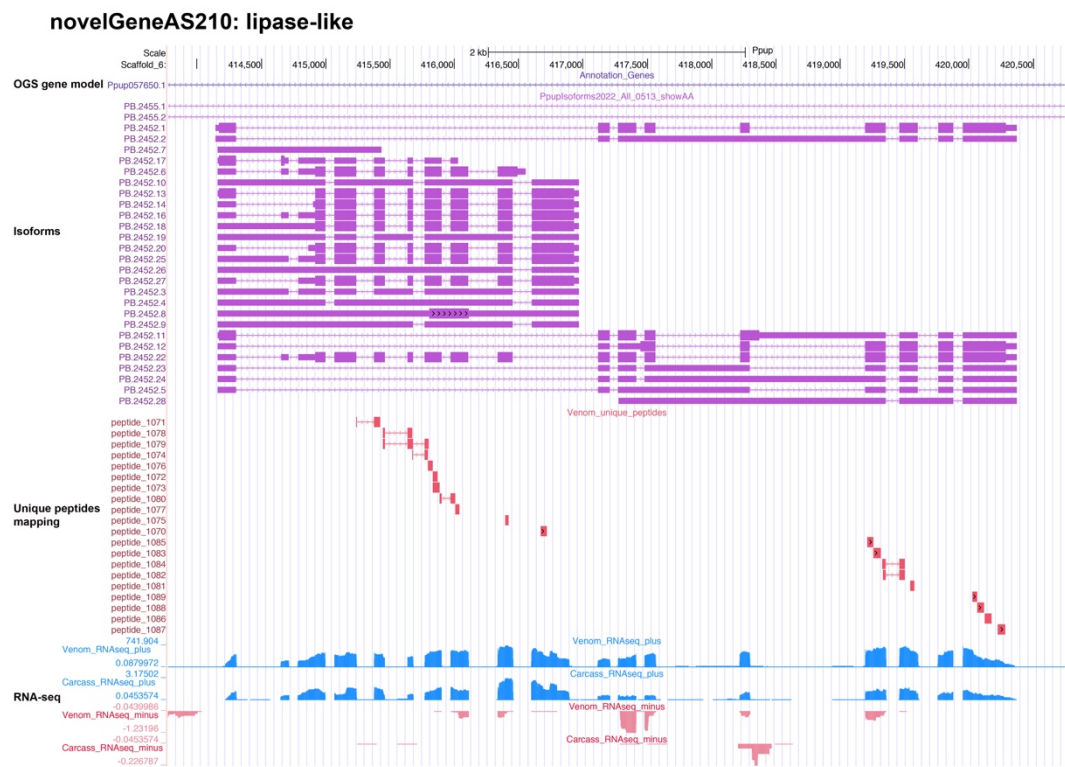

**Supplemental Fig S7. Lipase-like gene produces diverse venom proteins through alternative splicing, which supported by mass spectrometry.** Genome browser view of the lipase-like gene. From top to bottom, OGS gene model, Isoforms, Unique venom peptides mapping results, RNA-seq.

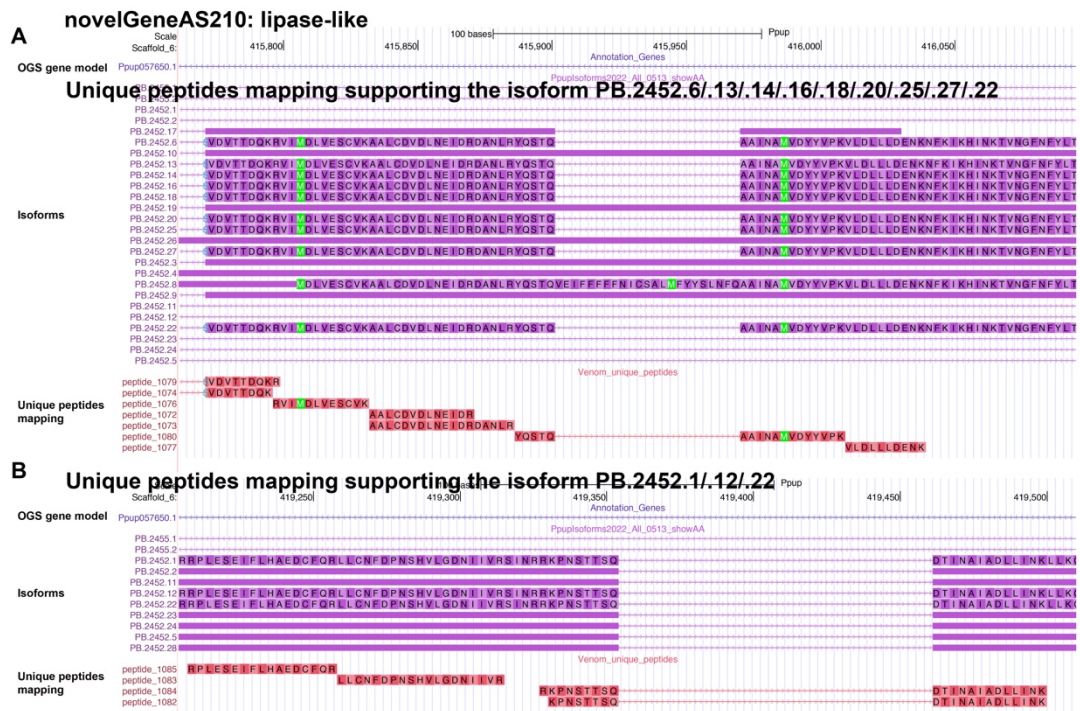

**Supplemental Fig S8. Zoomed view showing the peptide supporting information of the venom proteins encoded by the lipase-like gene (geneid: novelGeneAS210).**

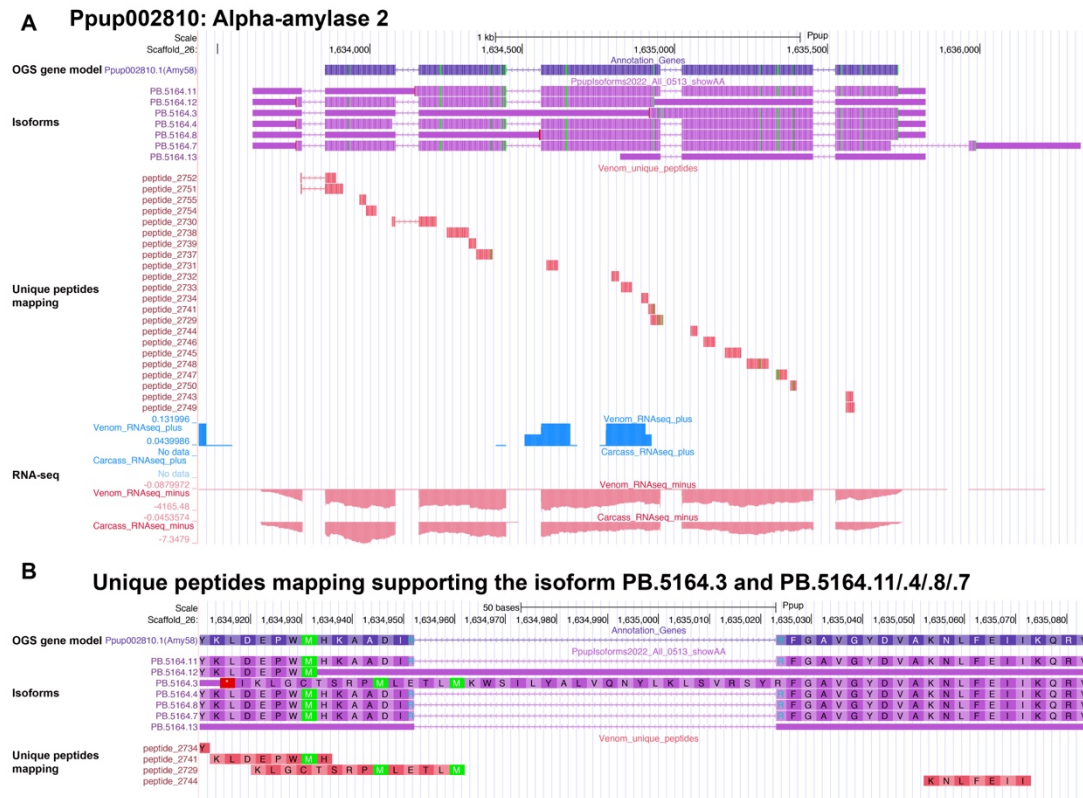

**Supplemental Fig S9. Alpha-amylase 2 gene produces diverse venom proteins through alternative splicing, which supported by mass spectrometry.** (A) Genome browser view of the alpha-amylase 2 gene. From top to bottom, OGS gene model, Isoforms, Unique venom peptides mapping results, RNA-seq. (B) Zoomed view showing the peptide supporting information of the venom proteins.



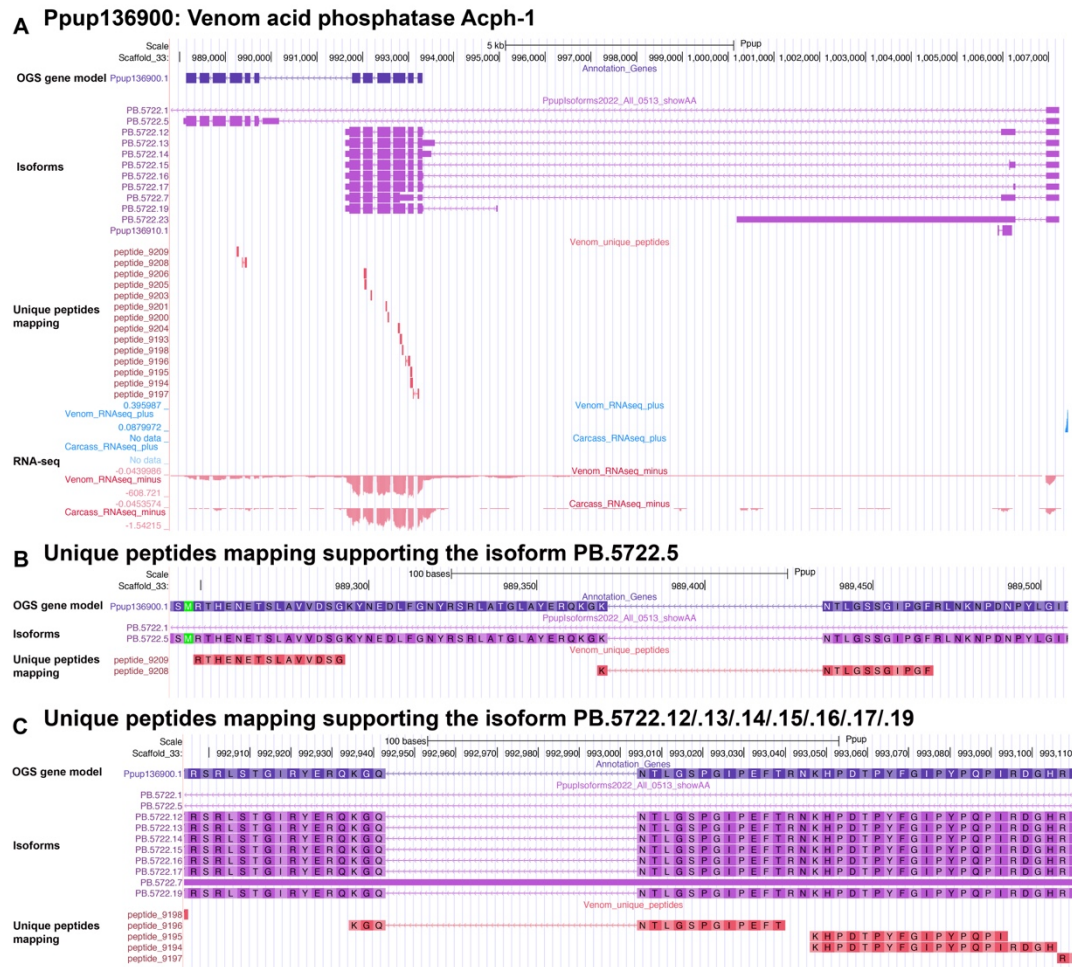

**Supplemental Fig S10. Venom acid phosphatase Acph-1 gene produces diverse venom proteins through alternative splicing, which supported by mass spectrometry.** (A) Genome browser view of the venom acid phosphatase Acph-1 gene. From top to bottom, OGS gene model, Isoforms, Unique venom peptides mapping results, RNA-seq. (B) Zoomed view showing the peptide supporting information of the venom PB.5722.5 protein. (C) Zoomed view showing the peptide supporting information of the venom proteins encoded by PB. 5722.12-17/19.

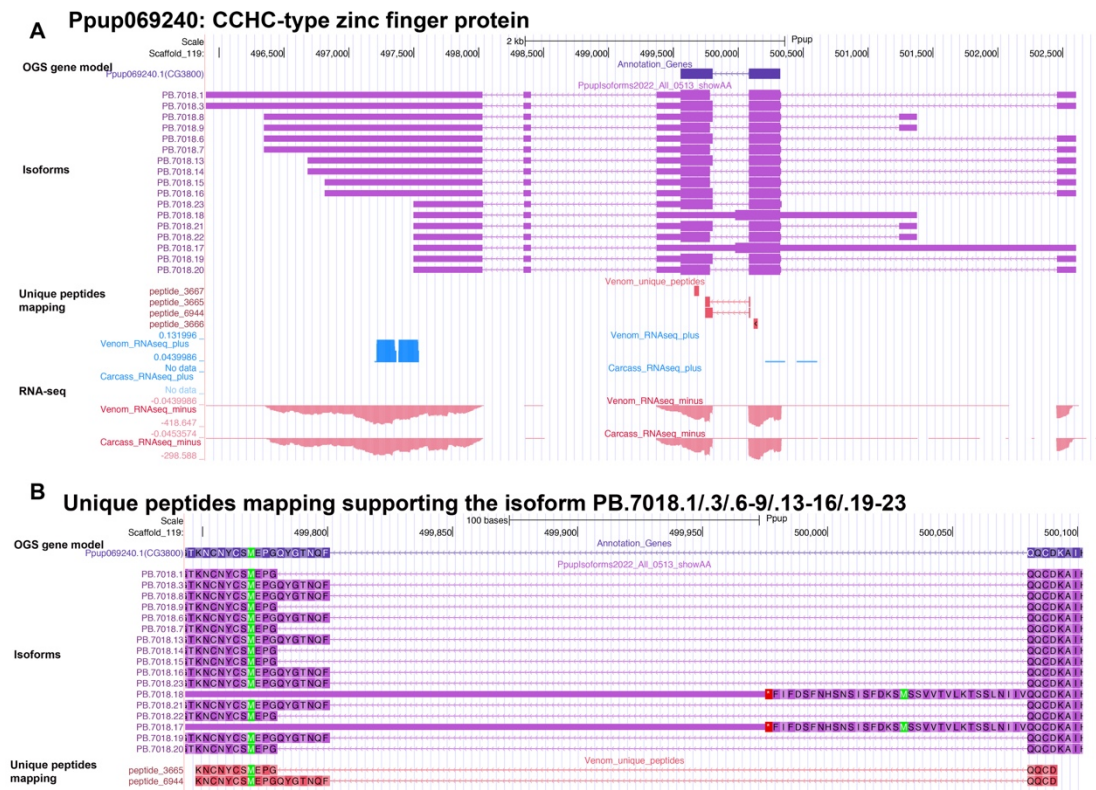

**Supplemental Fig S11. CCHC-type zinc finger protein gene produces diverse venom proteins through alternative splicing, which supported by mass spectrometry. (A)** Genome browser view of the CCHC-type zinc finger protein gene. From top to bottom, OGS gene model, Isoforms, Unique venom peptides mapping results, RNA-seq. **(B)** Zoomed view showing the peptide supporting information of the venom proteins.

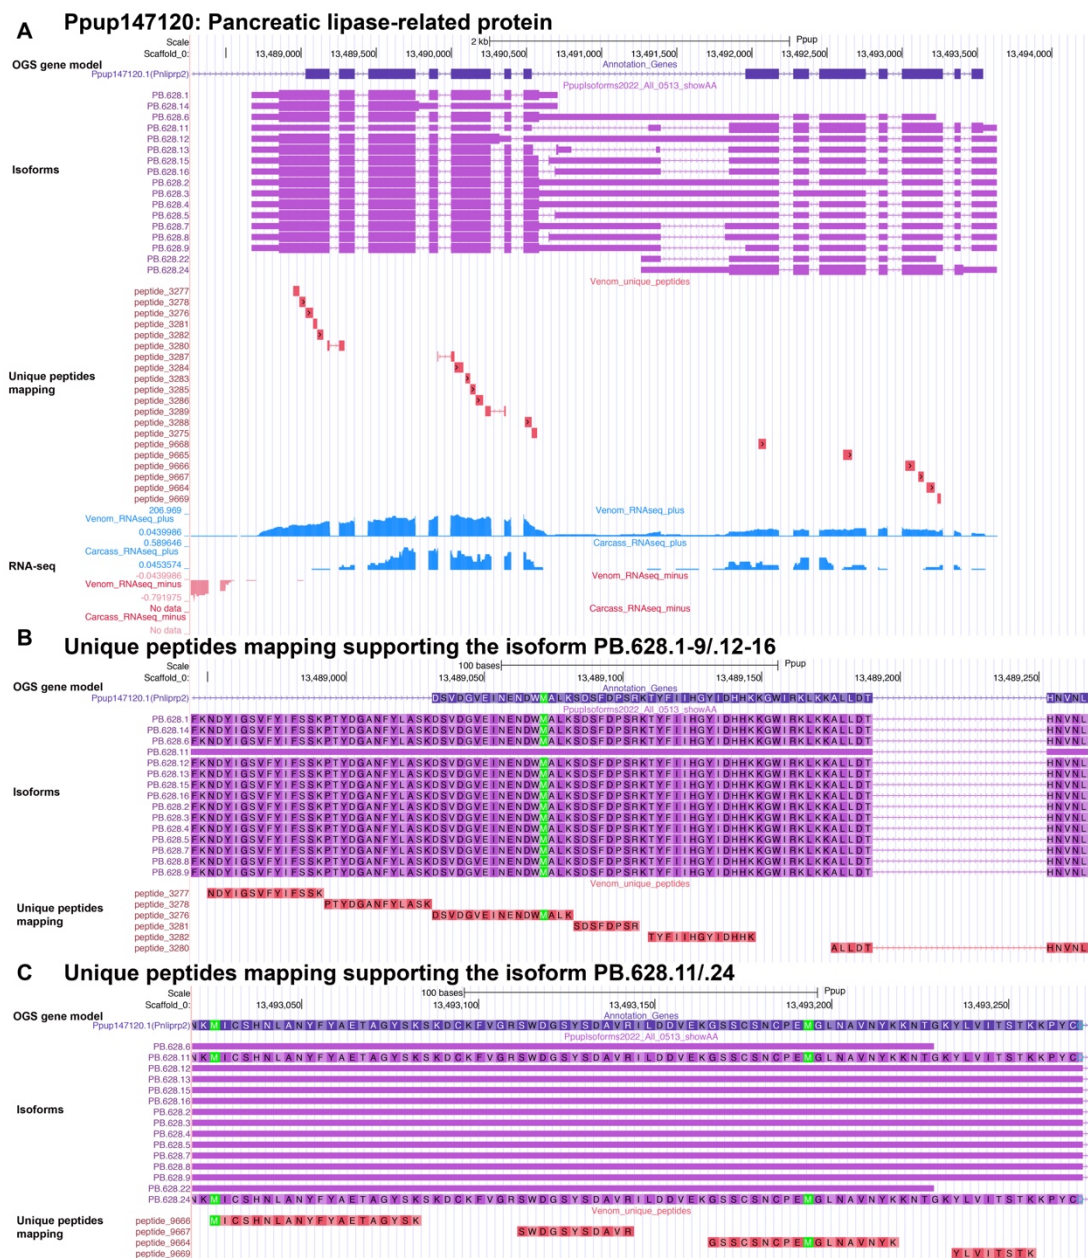

**Supplemental Fig S12. Pancreatic lipase-related protein gene produces diverse venom proteins through alternative splicing, which supported by mass spectrometry.** (A) Genome browser view of the Pancreatic lipase-related protein gene. From top to bottom, OGS gene model, Isoforms, Unique venom peptides mapping results, RNA-seq. (B) Zoomed view showing the peptide supporting information of the venom proteins encoded by PB.628.1-9/12-16. (C) Zoomed view showing the peptide supporting information of the venom proteins encoded by PB.628.11/24.



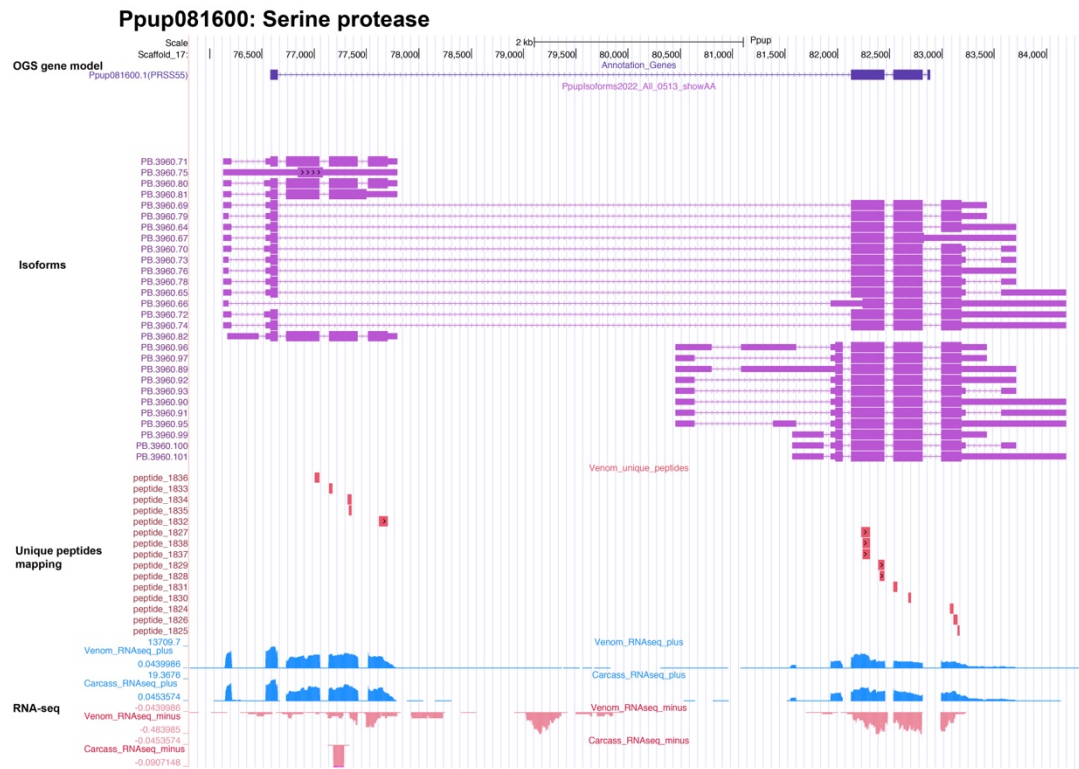

**Supplemental Fig S13. Serine protease gene produces diverse venom proteins through alternative splicing, which supported by mass spectrometry.** Genome browser view of the serine protease gene. From top to bottom, OGS gene model, Isoforms, Unique venom peptides mapping results, RNA-seq.

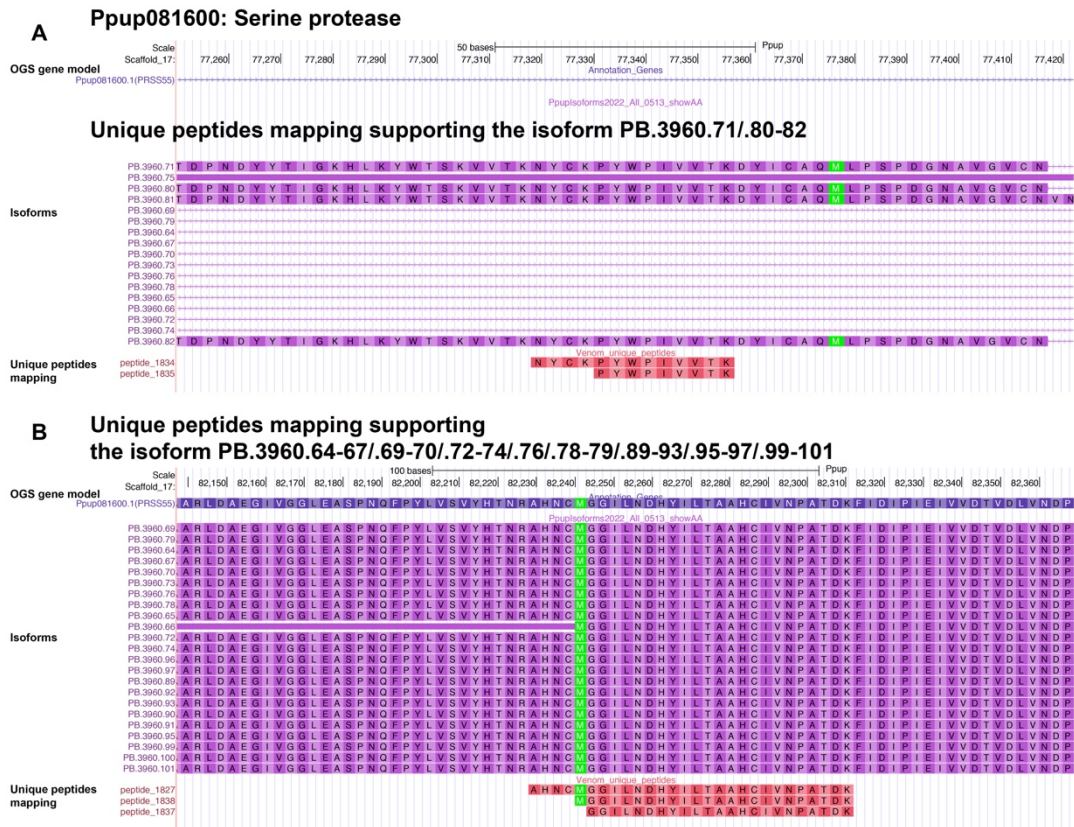

**Supplemental Fig S14. Zoomed view showing the peptide supporting information of the venom proteins encoded by the serine protease gene (geneid: Ppup081600).**

# Ppup140770: Serpin1

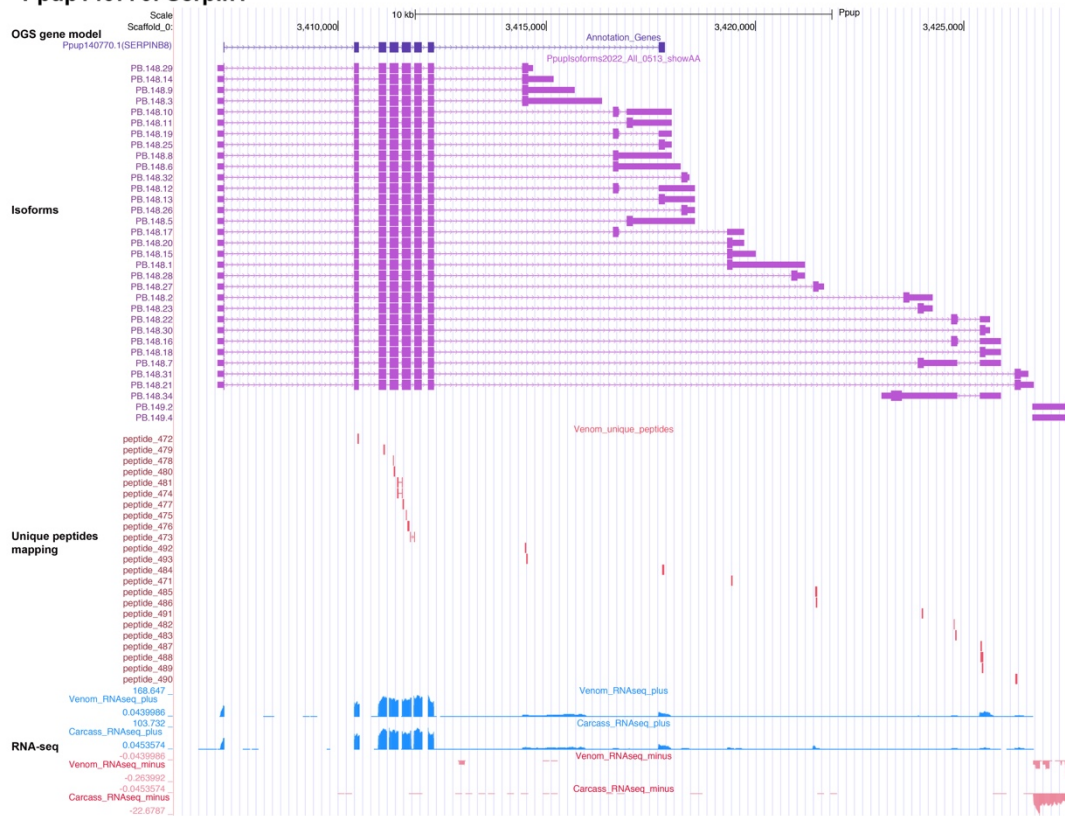

**Supplemental Fig S15. *Serpin1* gene produces diverse venom proteins through alternative splicing, which supported by mass spectrometry.** Genome browser view of the *serpin1* gene. From top to bottom, OGS gene model, Isoforms, Unique venom peptides mapping results, RNA-seq.

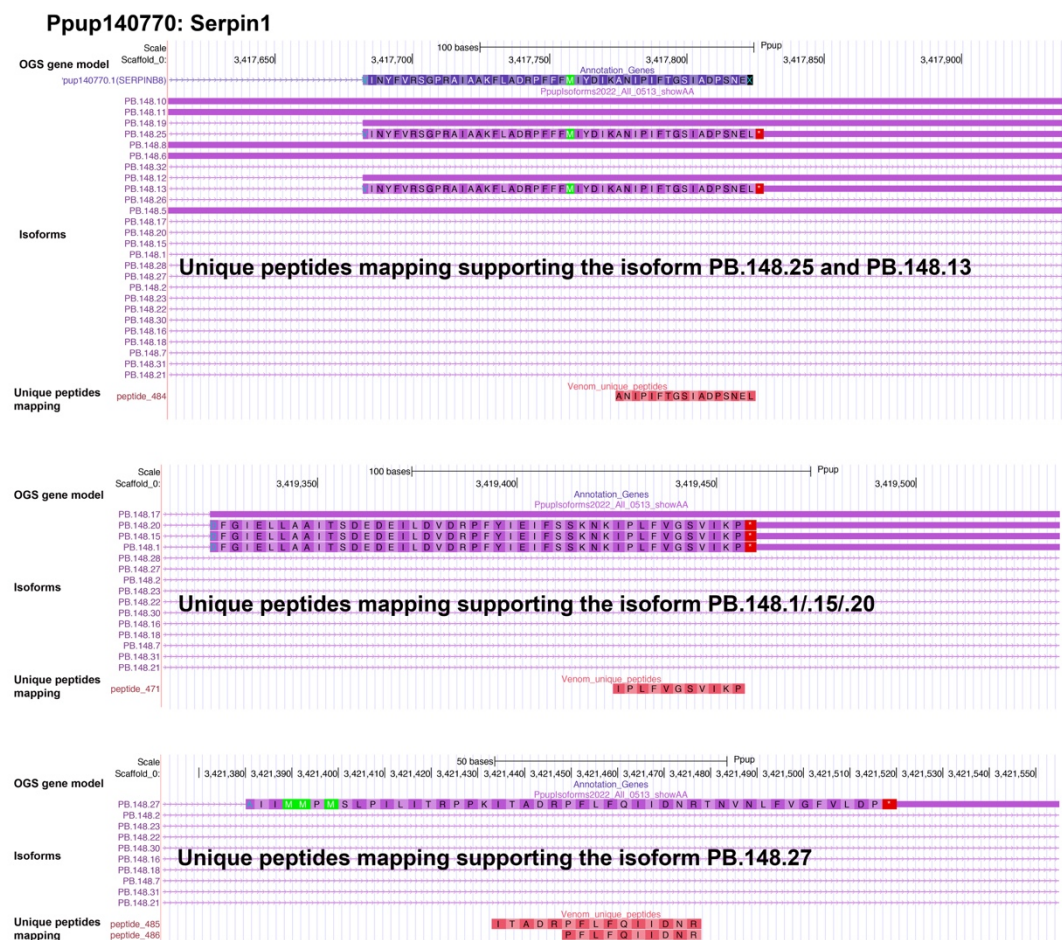

**Supplemental Fig S16. Zoomed view showing the peptide supporting information of the venom proteins encoded by the *serpin1* gene (geneid: Ppup140770).** This figure showed that peptide supporting evidence of three venom proteins that encoded by different isoforms of *serpin1* gene.



**Ppup140770: Serpin1**

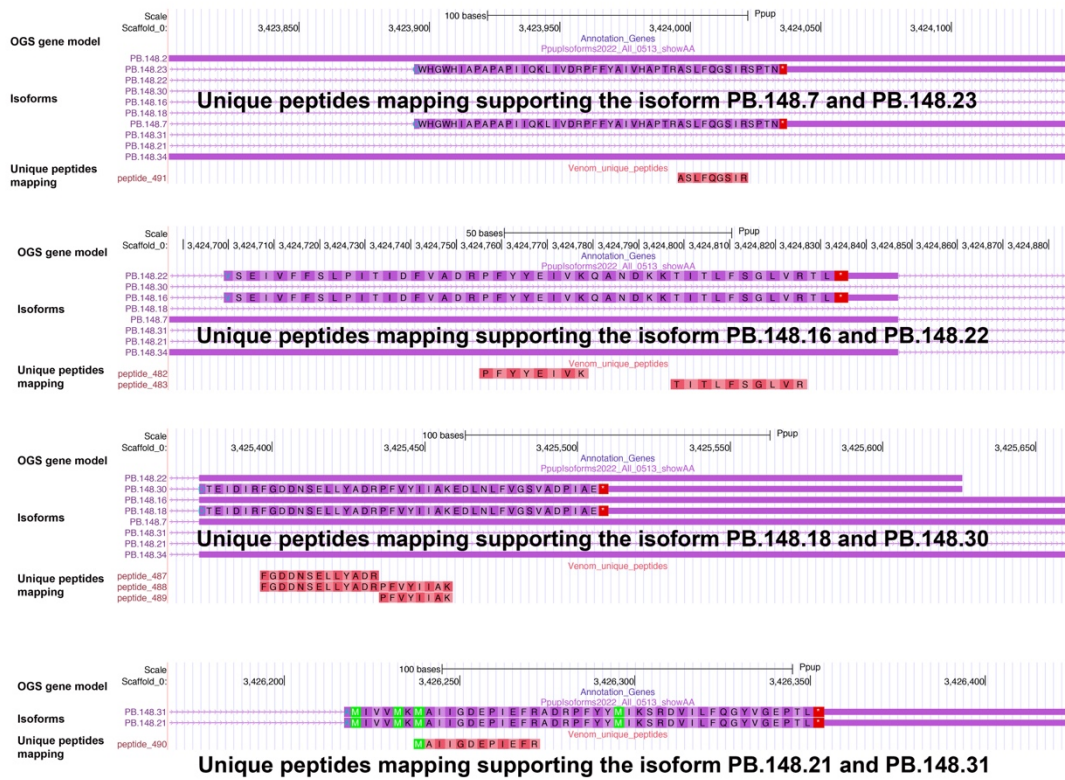

**Supplemental Fig S17. Zoomed view showing the peptide supporting information of the venom proteins encoded by the *serpin1* gene (geneid: Ppup140770).** This figure showed that peptide supporting evidence of four venom proteins that encoded by different isoforms of *serpin1* gene.

CLUSTAL O(1.2.4) multiple sequence alignment

```

PB.148.25_V      MNTPTVILALALCVCTMAEDKAVEALKAVSEGTQYFATNFFQVAARENKGNLISSPLS 60
PB.148.22_V      MNTPTVILALALCVCTMAEDKAVEALKAVSEGTQYFATNFFQVAARENKGNLISSPLS 60
PB.148.11_inVGnotV MNTPTVILALALCVCTMAEDKAVEALKAVSEGTQYFATNFFQVAARENKGNLISSPLS 60
PB.148.10_nV     MNTPTVILALALCVCTMAEDKAVEALKAVSEGTQYFATNFFQVAARENKGNLISSPLS 60
PB.148.2_nV      MNTPTVILALALCVCTMAEDKAVEALKAVSEGTQYFATNFFQVAARENKGNLISSPLS 60
PB.148.29_V      MNTPTVILALALCVCTMAEDKAVEALKAVSEGTQYFATNFFQVAARENKGNLISSPLS 60
PB.148.27_V      MNTPTVILALALCVCTMAEDKAVEALKAVSEGTQYFATNFFQVAARENKGNLISSPLS 60
PB.148.28_inVGnotV MNTPTVILALALCVCTMAEDKAVEALKAVSEGTQYFATNFFQVAARENKGNLISSPLS 60
PB.148.30_V      MNTPTVILALALCVCTMAEDKAVEALKAVSEGTQYFATNFFQVAARENKGNLISSPLS 60
PB.148.21_V      MNTPTVILALALCVCTMAEDKAVEALKAVSEGTQYFATNFFQVAARENKGNLISSPLS 60
PB.148.23_V      MNTPTVILALALCVCTMAEDKAVEALKAVSEGTQYFATNFFQVAARENKGNLISSPLS 60
PB.148.20_V      MNTPTVILALALCVCTMAEDKAVEALKAVSEGTQYFATNFFQVAARENKGNLISSPLS 60
PB.148.32_inVGnotV MNTPTVILALALCVCTMAEDKAVEALKAVSEGTQYFATNFFQVAARENKGNLISSPLS 60
*****

PB.148.25_V      AHVVLShAAFGAGGNTAVQMRQSLHMPADDVVSQGPFENLIDLNNVENVTLVANHMYL 120
PB.148.22_V      AHVVLShAAFGAGGNTAVQMRQSLHMPADDVVSQGPFENLIDLNNVENVTLVANHMYL 120
PB.148.11_inVGnotV AHVVLShAAFGAGGNTAVQMRQSLHMPADDVVSQGPFENLIDLNNVENVTLVANHMYL 120
PB.148.10_nV     AHVVLShAAFGAGGNTAVQMRQSLHMPADDVVSQGPFENLIDLNNVENVTLVANHMYL 120
PB.148.2_nV      AHVVLShAAFGAGGNTAVQMRQSLHMPADDVVSQGPFENLIDLNNVENVTLVANHMYL 120
PB.148.29_V      AHVVLShAAFGAGGNTAVQMRQSLHMPADDVVSQGPFENLIDLNNVENVTLVANHMYL 120
PB.148.27_V      AHVVLShAAFGAGGNTAVQMRQSLHMPADDVVSQGPFENLIDLNNVENVTLVANHMYL 120
PB.148.28_inVGnotV AHVVLShAAFGAGGNTAVQMRQSLHMPADDVVSQGPFENLIDLNNVENVTLVANHMYL 120
PB.148.30_V      AHVVLShAAFGAGGNTAVQMRQSLHMPADDVVSQGPFENLIDLNNVENVTLVANHMYL 120
PB.148.21_V      AHVVLShAAFGAGGNTAVQMRQSLHMPADDVVSQGPFENLIDLNNVENVTLVANHMYL 120
PB.148.23_V      AHVVLShAAFGAGGNTAVQMRQSLHMPADDVVSQGPFENLIDLNNVENVTLVANHMYL 120
PB.148.20_V      AHVVLShAAFGAGGNTAVQMRQSLHMPADDVVSQGPFENLIDLNNVENVTLVANHMYL 120
PB.148.32_inVGnotV AHVVLShAAFGAGGNTAVQMRQSLHMPADDVVSQGPFENLIDLNNVENVTLVANHMYL 120
*****

PB.148.25_V      ANDLKLSDYKQLTSGTFSEASEIDTKPAESAKLVNDWVKERTHNKIEDIVNEDDITT 180
PB.148.22_V      ANDLKLSDYKQLTSGTFSEASEIDTKPAESAKLVNDWVKERTHNKIEDIVNEDDITT 180
PB.148.11_inVGnotV ANDLKLSDYKQLTSGTFSEASEIDTKPAESAKLVNDWVKERTHNKIEDIVNEDDITT 180
PB.148.10_nV     ANDLKLSDYKQLTSGTFSEASEIDTKPAESAKLVNDWVKERTHNKIEDIVNEDDITT 180
PB.148.2_nV      ANDLKLSDYKQLTSGTFSEASEIDTKPAESAKLVNDWVKERTHNKIEDIVNEDDITT 180
PB.148.29_V      ANDLKLSDYKQLTSGTFSEASEIDTKPAESAKLVNDWVKERTHNKIEDIVNEDDITT 180
PB.148.27_V      ANDLKLSDYKQLTSGTFSEASEIDTKPAESAKLVNDWVKERTHNKIEDIVNEDDITT 180
PB.148.28_inVGnotV ANDLKLSDYKQLTSGTFSEASEIDTKPAESAKLVNDWVKERTHNKIEDIVNEDDITT 180
PB.148.30_V      ANDLKLSDYKQLTSGTFSEASEIDTKPAESAKLVNDWVKERTHNKIEDIVNEDDITT 180
PB.148.21_V      ANDLKLSDYKQLTSGTFSEASEIDTKPAESAKLVNDWVKERTHNKIEDIVNEDDITT 180
PB.148.23_V      ANDLKLSDYKQLTSGTFSEASEIDTKPAESAKLVNDWVKERTHNKIEDIVNEDDITT 180
PB.148.20_V      ANDLKLSDYKQLTSGTFSEASEIDTKPAESAKLVNDWVKERTHNKIEDIVNEDDITT 180
PB.148.32_inVGnotV ANDLKLSDYKQLTSGTFSEASEIDTKPAESAKLVNDWVKERTHNKIEDIVNEDDITT 180
*****

PB.148.25_V      DTRMLLNNAVYFQGNWAEFKKEGTQDKIFHLDAKTEKKVPTMFASGSYYVGLPDLFAK 240
PB.148.22_V      DTRMLLNNAVYFQGNWAEFKKEGTQDKIFHLDAKTEKKVPTMFASGSYYVGLPDLFAK 240
PB.148.11_inVGnotV DTRMLLNNAVYFQGNWAEFKKEGTQDKIFHLDAKTEKKVPTMFASGSYYVGLPDLFAK 240
PB.148.10_nV     DTRMLLNNAVYFQGNWAEFKKEGTQDKIFHLDAKTEKKVPTMFASGSYYVGLPDLFAK 240
PB.148.2_nV      DTRMLLNNAVYFQGNWAEFKKEGTQDKIFHLDAKTEKKVPTMFASGSYYVGLPDLFAK 240
PB.148.29_V      DTRMLLNNAVYFQGNWAEFKKEGTQDKIFHLDAKTEKKVPTMFASGSYYVGLPDLFAK 240
PB.148.27_V      DTRMLLNNAVYFQGNWAEFKKEGTQDKIFHLDAKTEKKVPTMFASGSYYVGLPDLFAK 240
PB.148.28_inVGnotV DTRMLLNNAVYFQGNWAEFKKEGTQDKIFHLDAKTEKKVPTMFASGSYYVGLPDLFAK 240
PB.148.30_V      DTRMLLNNAVYFQGNWAEFKKEGTQDKIFHLDAKTEKKVPTMFASGSYYVGLPDLFAK 240
PB.148.21_V      DTRMLLNNAVYFQGNWAEFKKEGTQDKIFHLDAKTEKKVPTMFASGSYYVGLPDLFAK 240
PB.148.23_V      DTRMLLNNAVYFQGNWAEFKKEGTQDKIFHLDAKTEKKVPTMFASGSYYVGLPDLFAK 240
PB.148.20_V      DTRMLLNNAVYFQGNWAEFKKEGTQDKIFHLDAKTEKKVPTMFASGSYYVGLPDLFAK 240
PB.148.32_inVGnotV DTRMLLNNAVYFQGNWAEFKKEGTQDKIFHLDAKTEKKVPTMFASGSYYVGLPDLFAK 240
*****

PB.148.25_V      FVELPYENDLKMVIIVPDEIEGLSAIQENLESFNHTLAEAGSERDQIYLPKFKIEST 300
PB.148.22_V      FVELPYENDLKMVIIVPDEIEGLSAIQENLESFNHTLAEAGSERDQIYLPKFKIEST 300
PB.148.11_inVGnotV FVELPYENDLKMVIIVPDEIEGLSAIQENLESFNHTLAEAGSERDQIYLPKFKIEST 300
PB.148.10_nV     FVELPYENDLKMVIIVPDEIEGLSAIQENLESFNHTLAEAGSERDQIYLPKFKIEST 300
PB.148.2_nV      FVELPYENDLKMVIIVPDEIEGLSAIQENLESFNHTLAEAGSERDQIYLPKFKIEST 300
PB.148.29_V      FVELPYENDLKMVIIVPDEIEGLSAIQENLESFNHTLAEAGSERDQIYLPKFKIEST 300
PB.148.27_V      FVELPYENDLKMVIIVPDEIEGLSAIQENLESFNHTLAEAGSERDQIYLPKFKIEST 300
PB.148.28_inVGnotV FVELPYENDLKMVIIVPDEIEGLSAIQENLESFNHTLAEAGSERDQIYLPKFKIEST 300
PB.148.30_V      FVELPYENDLKMVIIVPDEIEGLSAIQENLESFNHTLAEAGSERDQIYLPKFKIEST 300
PB.148.21_V      FVELPYENDLKMVIIVPDEIEGLSAIQENLESFNHTLAEAGSERDQIYLPKFKIEST 300
PB.148.23_V      FVELPYENDLKMVIIVPDEIEGLSAIQENLESFNHTLAEAGSERDQIYLPKFKIEST 300
PB.148.20_V      FVELPYENDLKMVIIVPDEIEGLSAIQENLESFNHTLAEAGSERDQIYLPKFKIEST 300
PB.148.32_inVGnotV FVELPYENDLKMVIIVPDEIEGLSAIQENLESFNHTLAEAGSERDQIYLPKFKIEST 300
*****

PB.148.25_V      IDLQKPLEALGNTOMFTNSANFSGVSDLLKVSQVTKAFIEVNEEGSEAAAVTVINYPV 360
PB.148.22_V      IDLQKPLEALGNTOMFTNSANFSGVSDLLKVSQVTKAFIEVNEEGSEAAAVTVSEIVF 360
PB.148.11_inVGnotV IDLQKPLEALGNTOMFTNSANFSGVSDLLKVSQVTKAFIEVNEEGSEAAAVTVIKAVL 360
PB.148.10_nV     IDLQKPLEALGNTOMFTNSANFSGVSDLLKVSQVTKAFIEVNEEGSEAAAVTVQVMT 360
PB.148.2_nV      IDLQKPLEALGNTOMFTNSANFSGVSDLLKVSQVTKAFIEVNEEGSEAAAVTVQGLIA 360
PB.148.29_V      IDLQKPLEALGNTOMFTNSANFSGVSDLLKVSQVTKAFIEVNEEGSEAAAVTVGIMT 360
PB.148.27_V      IDLQKPLEALGNTOMFTNSANFSGVSDLLKVSQVTKAFIEVNEEGSEAAAVTAIHMP 360
PB.148.28_inVGnotV IDLQKPLEALGNTOMFTNSANFSGVSDLLKVSQVTKAFIEVNEEGSEAAAVTVGVSP 360
PB.148.30_V      IDLQKPLEALGNTOMFTNSANFSGVSDLLKVSQVTKAFIEVNEEGSEAAAVTVTEID 360
PB.148.21_V      IDLQKPLEALGNTOMFTNSANFSGVSDLLKVSQVTKAFIEVNEEGSEAAAVTAMIVM 360
PB.148.23_V      IDLQKPLEALGNTOMFTNSANFSGVSDLLKVSQVTKAFIEVNEEGSEAAAVTQNGRW 360
PB.148.20_V      IDLQKPLEALGNTOMFTNSANFSGVSDLLKVSQVTKAFIEVNEEGSEAAAVTQGIEL 360
PB.148.32_inVGnotV IDLQKPLEALGNTOMFTNSANFSGVSDLLKVSQVTKAFIEVNEEGSEAAAVTVKIRP 360
*****

PB.148.25_V      --RSGPRAIAAKFLADRPFFMIYDIKA---NIFPTGSIADPSNEL*-- 402
PB.148.22_V      FSL-----PITIDPVADRPFYIIVQANDKRTITLFSGLVRTL*----- 399
PB.148.11_inVGnotV ISAAALPDP--VELRADRPFAFQILNQS---KVALFTGSLNDFSVIFP* 404
PB.148.10_nV     LSASQGVVPPVFAARRPFTTLIDHT---NLPIVQTVEL*----- 400
PB.148.2_nV      DSIV----RSDVFEADRSFLYITEDAHN---NILFEGLVQPSL*----- 398
PB.148.29_V      YSPV----YKPLMADRPFLLFAIVDEHT---KVTLFQGVQPS*----- 398
PB.148.27_V      MSLPILITRPFKITADRPFLFQIDNRT---KVNLFVGVFLDP*----- 400
PB.148.28_inVGnotV MSLSYVVRPWRKADRPFLFQIVDNRT---KVTLFVGFALDPTINN*-- 404
PB.148.30_V      --IRFGDNRSELLYADRPFYIYIAK--E---DLNLFVGSVADPIAK*-- 398
PB.148.21_V      -KMAIGDNEIFRADRPFYIYIKS--R---DVLFGQYVGEPTN*----- 399
PB.148.23_V      IAPA-PAPIIKLIVDRPFYIYIVHPT---RASLFQGSIRSEPTN*----- 401
PB.148.20_V      LAAI--TSDEIDELVDKPFYIYIKFSN---KIPLFVGSVIFK*----- 399
PB.148.32_inVGnotV VSALIFKEEPTIIVDRPFYIGIFDHT---KTLFSGYIINPTA*----- 402

```

Supplemental Fig S18. Multiple sequence alignment of Serpin proteins encoded by *PpSerp1* gene.

## Ppup057710: Putative uncharacterized protein

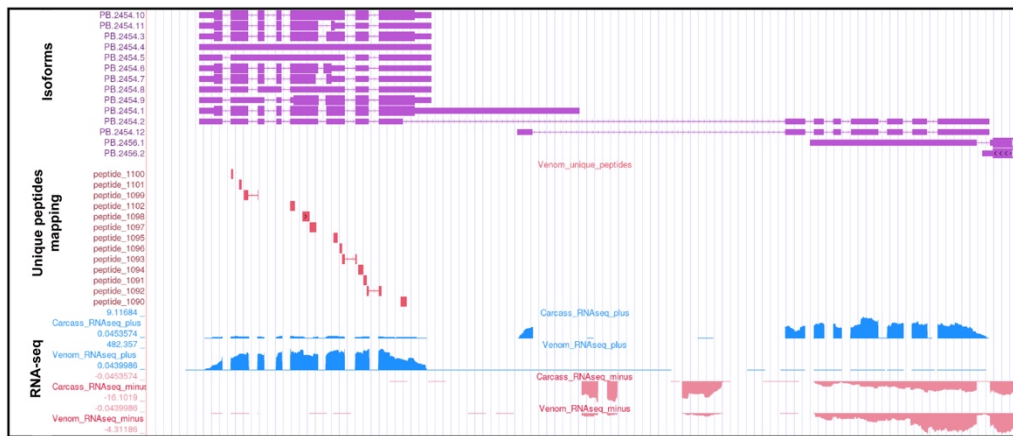

**Supplemental Fig S19. Ppup057710 venom gene shows isoform usage shifts between venom gland and carcass.** From top to bottom, Isoforms, Unique venom peptides mapping results, RNA-seq (Blue represents Watson strand mapping reads; Red represents Crick strand mapping reads).

## Ppup092220: Putative uncharacterized protein

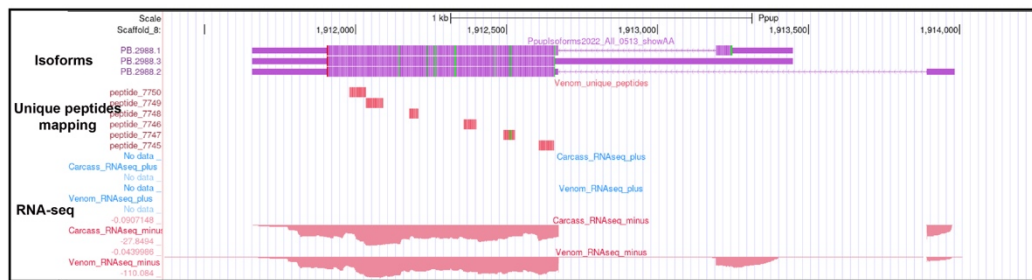

**Supplemental Fig S20. Ppup092220 venom gene shows isoform usage shifts between venom gland and carcass.** From top to bottom, Isoforms, Unique venom peptides mapping results, RNA-seq (Blue represents Watson strand mapping reads; Red represents Crick strand mapping reads).



### Ppup035100: 2-oxoglutarate and iron-dependent oxygenase domain-containing protein 3

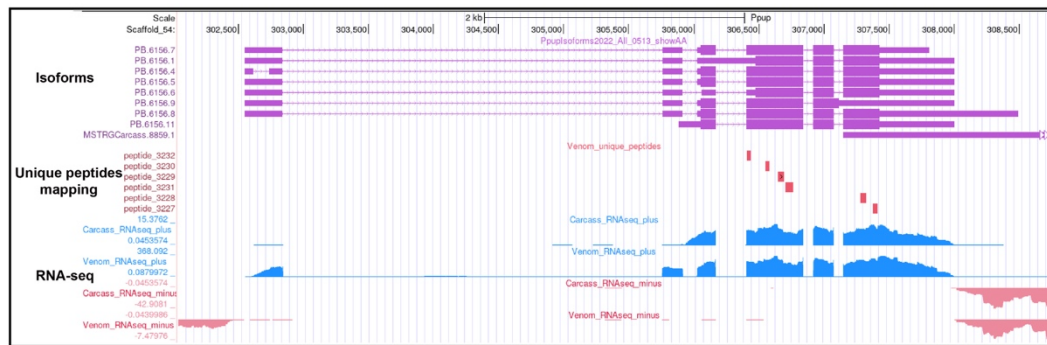

**Supplemental Fig S21. Ppup035100 venom gene shows isoform usage shifts between venom gland and carcass.** From top to bottom, Isoforms, Unique venom peptides mapping results, RNA-seq (Blue represents Watson strand mapping reads; Red represents Crick strand mapping reads).

## Ppup003240: Natterin-3

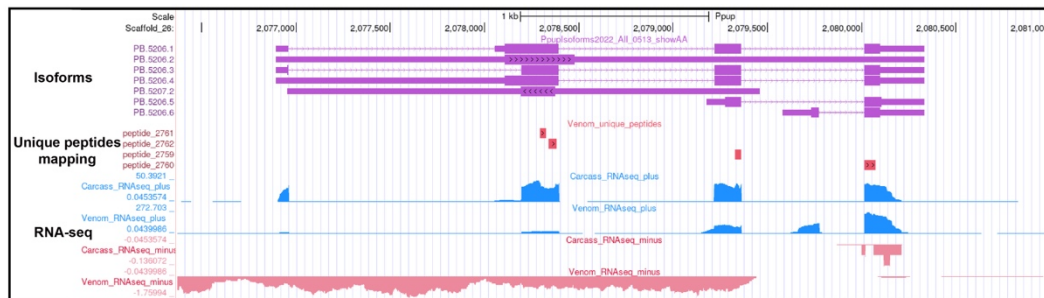

**Supplemental Fig S22. Ppup003240 venom gene shows isoform usage shifts between venom gland and carcass.** From top to bottom, Isoforms, Unique venom peptides mapping results, RNA-seq (Blue represents Watson strand mapping reads; Red represents Crick strand mapping reads).

**novelGenePB.2583: Putative uncharacterized protein**

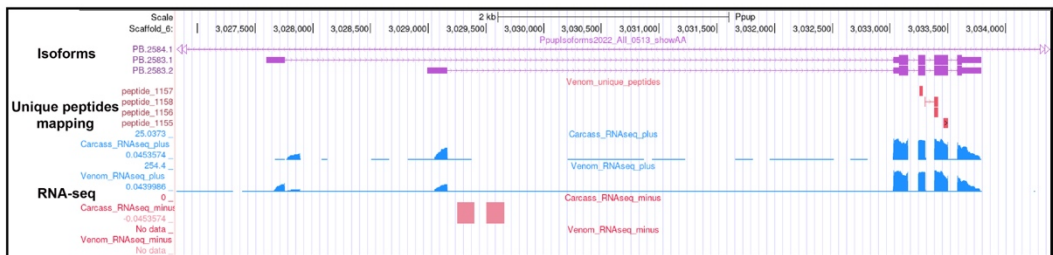

**Supplemental Fig S23. novelGenePB.2583 venom gene shows isoform usage shifts between venom gland and carcass.** From top to bottom, Isoforms, Unique venom peptides mapping results, RNA-seq (Blue represents Watson strand mapping reads; Red represents Crick strand mapping reads).

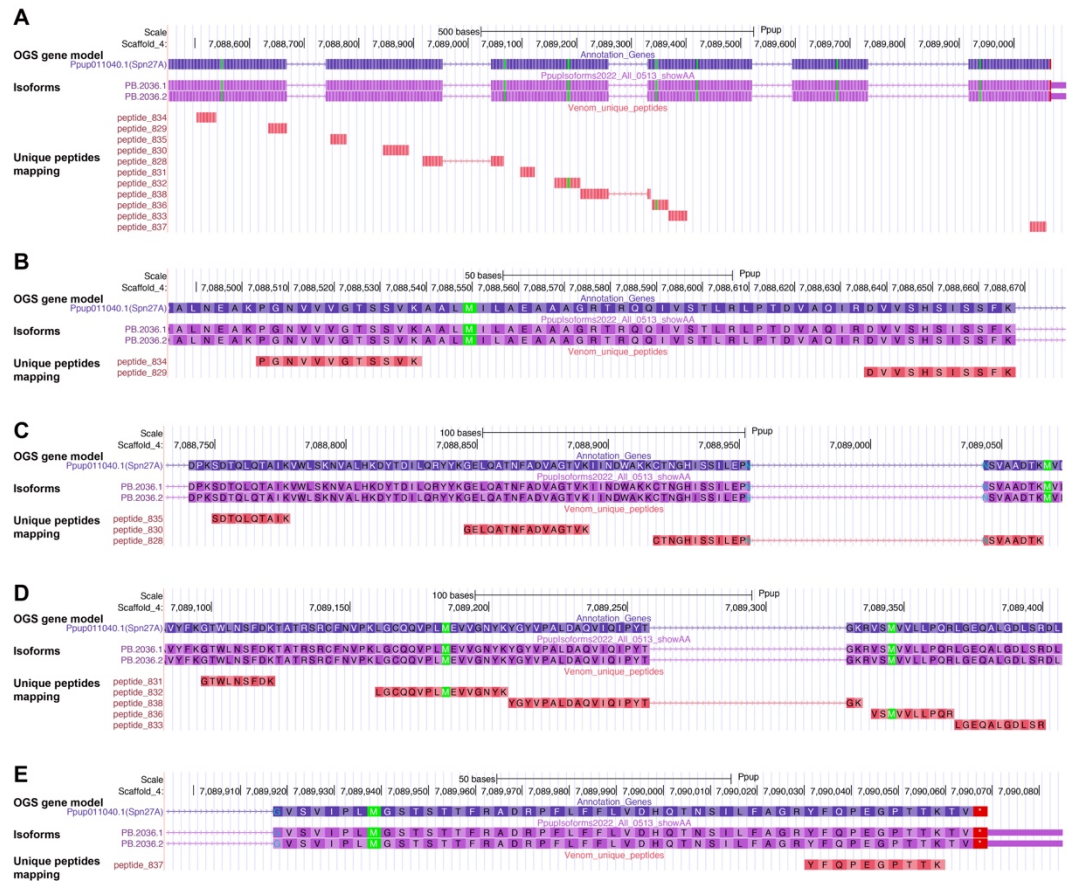

**Supplemental Fig S24. Mass spectrometry data supports presence of the serpin-C protein in venom.** (A) Genome browser view of the *serpin3* gene. This is a zoomed view of the Fig. 4A in the main text. From top to bottom, OGS gene model, Isoforms, Unique venom peptides mapping results. (B-E) Zoomed view showing the peptide supporting information.

CLUSTAL O(1.2.4) multiple sequence alignment

```

PB.7110.1      MLLVVALCCAVVAGIQASPISPQREIIPLNAEFAAQPEYVQALANELEKEGVAEKLSQAE      60
PB.7110.3      MLLVVALCCAVVAGIQASPISPQREIIPLNAEFAAQPEYVQALANELEKEGTTTESSLNI      60
                *****
PB.7110.1      DHLTRNAPNDFDSPDYGHNQKFAGHRKPDSTHHSVKNKGFSETIIFPSDII EYTNQKRNFD      120
PB.7110.3      RR-KRGYPVHVYEPVFPSS--LFNNEKLTTT-----TTVAP-----KKYR      97
                : * . * . . * : * . : : * * : : *
PB.7110.1      EIDRNG-----FSGFSKRNFEID-R-TGFSGFSKRNFEIDRTGFSGFNKKRNFEID      172
PB.7110.3      EIHSGGNLDHIGSNLLRSVSRSPDKKAADSGRVRTKRDVLYNP-Y--YAMVPLFFDIP      154
                ** . * * . : * . . . : : . ** : : * : . : : *
PB.7110.1      RTGFSGF-NKRNFEIDRNGFSGFSKRNFEIDRTGFSGFNKKRNFEIDRNGFSGFSKR      231
PB.7110.3      --VFPSWFNPETTTTTTTTVAPTTKHK-----HDYDSRGTLDPIGGG--NFVRR      200
                * . : * . . . . : : : : . : : . : * . . * : *
PB.7110.1      NFDEIDRTGFSGFNKKRNFEIDRTGFSGFNKKRNFEIDRSGFSGFNKKRNFEIDRSGFS      291
PB.7110.3      K-----REVTSGTF*-----                          209
                : * *
PB.7110.1      GFSRKRNFEIDRSGVPGFAKRSIASSRSGKSQRTH*      327
PB.7110.3      -----                          209

```

**Supplemental Fig S25. Multiple sequence alignment of the two proteins that are encoded by *PpOrcokinin* gene.**

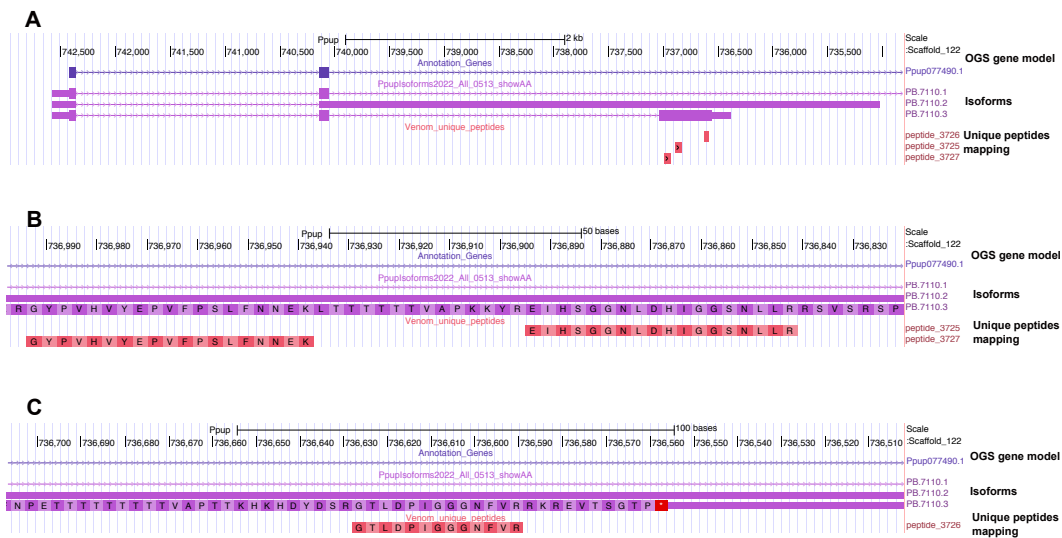

**Supplemental Fig S26. Mass spectrometry data supports presence of the PB.7110.3 protein in venom.** (A) Genome browser view of the *orcoxinin* gene. This is a zoomed view of the Fig. 5A in the main text. From top to bottom, OGS gene model, Isoforms, Unique venom peptides mapping results. (B and C) Zoomed view showing the peptide supporting information.

**Alignment block 1 of 6 in window, 736558 - 736802, 245 bps**

```

Ppup taa-----ggagtaccagaagtcacctccctcttctcttgacaaaattaccacctccaatcggtcgag
Pven ta-----ggagtaccagaagtcacctccctcttctcttgacaaaattaccacctccaatcgagtcgag
Pqin ta-----ggagtaccagaagtcacctccctcttctcttgacaaaattaccacctccaatcgagtcgag
Nvit taatgttgaggttgccagaagtcgctctc---tcctctgataatttaccacctccgatcgaatcgag

Ppup ggtacctctagaatcataatcatgtttgtgctttgtgttgagcaactgctgctgctgc-----gtg
Pven ggtacctctaggtattataattatgtttgtgctttgtgttgagcaactgctgctgctgctcttctgctg
Pqin ggtacctctagaatcataatcatgtttgtgctttgtgttgagcaactgctgctgctgc-----gtg
Nvit ggtacctcttgaatcataatcatgtttgtgctt---tttgagcagcctgctgctggtg---gtcgtg

Ppup gttgtcgttgtttcaggattaaaccagc---ttggaaaaaccgggatgctgggaaaaag-----
Pven gttgtcgttgtttcaggattagaccagt---ttgcaaaaaccgggacgctcaggaaaaagtattatccggga
Pqin gttgtcgttgttttaggattagaccagc---ttggaaaaaccaggatgctgggaaaaag-----
Nvit gttgtcgttgtttcaggattagccttgcctgttgggaaatcatgacgctgggaaacag-----

Ppup -----tggtaccat-tgcataatac-----tctctctgacaaaattaccacctccaa
Pven atctgcacttctcttgagaccac-caaaagtcacctccctcttctcttgacaaaattaccacctccaa
Pqin -----ttgtaacat-tagatcataa-----tctctctgacaaaattaccacctccaa
Nvit -----ctgtattatatataggaaaa-----tctctctgacaaaattaccacctccaa

Ppup -----ggattatacagaacgctcgcgcttggttct-----accgtcgtcgtcgt
Pven tcgagtcgagggtagcctctaggtattataattatgtttgtgctttgtgttgagcaactgctgctgct
Pqin -----ggattatacgaacgctcgcgcttggttct-----accgtcgtcgtcgtcgt
Nvit -----ggattgtcggaaagtcgcgctttagctct-----accgtcgtcgtcgtcgtcgt

Ppup -----gacc--ctgccaga
Pven cttcatcatggttgcgtggtttcaggatgaaaccagctgccaga
Pqin -----gacc--ctgccaga
Nvit -----gagg--ctgctaaa

```

**Supplemental Fig S27. The zoomed view of the alignment of the exon3 of PB.7110.3 showing a specific DNA insertion in *P. venustus*.**
