# Supplementary material for: Comprehensive isoform-level analysis reveals the contribution of alternative isoforms to venom evolution and repertoire diversity
Source: HighWire-hosted journal article supplement (doi:10.1101/gr.277707.123), 2023-09-01
Supplement: Supplemental_Tables_S1_to_S19.zip [file Supplemental_Table_S1.xlsx]

## Sheet: Sheet1
Supplemental Table S1. Summary of Iso-Seq data
Data	Size	Output Prefix	Total subreads	Total bases
Carcass	74G	Carcass.ccs	15201324	40323438256
Venom	79G	Venom.ccs	17238912	43490489389
