# Supplementary material for: Comprehensive isoform-level analysis reveals the contribution of alternative isoforms to venom evolution and repertoire diversity
Source: HighWire-hosted journal article supplement (doi:10.1101/gr.277707.123), 2023-09-01
Supplement: Supplemental_Tables_S1_to_S19.zip [file Supplemental_Table_S2.xlsx]

## Sheet: Sheet1
Supplemental Table S2. Statistics of CCS and Iso-Seq workflow.
Data	CCS			lima primer detection	Refine		Clustering		High quality clusters		Low quality clusters
	ZMWs Input	ZMWs generating CCS	CCS pass filter	Primer removed	FLNC reads	mapped	Isoform clustered	mapped	clusters	mapped	clusters	mapped
Carcass	535969	472303	88.1213	470708	470033	468817	39976	39925	39783	39733	193	192
Venom	607118	545864	89.9107	543436	539407	538169	33957	33871	33764	33678	193	193
