# Supplementary material for: Comprehensive isoform-level analysis reveals the contribution of alternative isoforms to venom evolution and repertoire diversity
Source: HighWire-hosted journal article supplement (doi:10.1101/gr.277707.123), 2023-09-01
Supplement: Supplemental_Tables_S1_to_S19.zip [file Supplemental_Table_S4.xlsx]

## Sheet: Sheet1
Supplemental Table S4. Statistics for the genes and isoforms in our study.
Items	Number	Reference
OGS1.0		Ye et al. Mol Ecol Resour. 2020;20:1384–1402.
protein-coding genes	14946
OGS2.0		Mei et al. Nucleic Acids Res. 2022;50,D1:D1040–D1045
protein-coding genes	17656
OGS2.1		This study
Genes
protein-coding genes	17901
non-coding genes	659
total	18560
Isoforms
protein-coding isoforms	32212
non-coding isoforms	3222
total	35434
Alternative splicing (AS)
genes with AS	3220
protein-coding genes with AS	3087
protein-coding genes produce multiple proteins via AS	2252
