# Supplementary material for: Comprehensive isoform-level analysis reveals the contribution of alternative isoforms to venom evolution and repertoire diversity
Source: HighWire-hosted journal article supplement (doi:10.1101/gr.277707.123), 2023-09-01
Supplement: Supplemental_Tables_S1_to_S19.zip [file Supplemental_Table_S5.xlsx]

## Sheet: Sheet1
Supplemental Table S5. Statistics of isoform number of genes (only showing the genes with more than 20 isoforms).
geneid	isoform number	Annotation
Ppup008030	266	Longitudinals lacking protein, isoforms H/M/V
Ppup019930	80	RNA-binding protein lark isoform X5
Ppup141800	59	Calcium-transporting ATPase sarcoplasmic/endoplasmic reticulum type
Ppup081590	56	Putative uncharacterized protein
Ppup095370	53	Serine/threonine-protein kinase Doa
Ppup044750	44	Putative uncharacterized protein
novelGeneAS210	43
Ppup110820	42	Myosin heavy chain, muscle
Ppup119400	38	Putative uncharacterized protein
Ppup007830	35	Zinc finger protein 112
Ppup105800	34	Putative uncharacterized protein
Ppup020230	33	PDZ and LIM domain protein Zasp
Ppup105870	33	Putative uncharacterized protein
Ppup167750	33	Neprilysin-2
Ppup140770	31	Serpin B8
Ppup134970	30	Prickle planar cell polarity protein 3
Ppup163540	30	Putative uncharacterized protein
Ppup093230	29	Plasminogen activator inhibitor 1 RNA-binding protein
Ppup010940	29	Serine-arginine protein 55
Ppup053430	29	Reticulon-3-A
Ppup143580	29	Zinc finger RNA-binding protein
Ppup071010_Ppup071020	29
Ppup081600	28	Serine protease 55
Ppup041520	27	Protein anoxia up-regulated
Ppup116760	27	Putative ATP-dependent RNA helicase an3
Ppup018760	27	Serine/threonine-protein kinase MARK2
Ppup127140_Ppup127130	26
Ppup133960	26	Ankyrin-3
Ppup154610	26	Chromodomain Y-like protein 2
Ppup109150	26	BTB/POZ domain-containing protein 10
novelGenePB.31	25
Ppup106190	25	RNA-binding protein 14
Ppup027810	25	Serine/threonine-protein kinase OSR1
Ppup126340	25	Putative uncharacterized protein
Ppup172680	25	Putative uncharacterized protein
Ppup168280	24	RNA-binding protein squid
Ppup167810	24	E3 SUMO-protein ligase PIAS3
Ppup138980	24	CCR4-NOT transcription complex subunit 4
Ppup153070	24	Putative uncharacterized protein
Ppup133440	23	Vitellogenin
Ppup135110	23	Dynamin
Ppup167240	23	2-oxoglutarate dehydrogenase, mitochondrial
Ppup161560	23	Kelch-like ECH-associated protein 1
Ppup031100	23	PAN2-PAN3 deadenylation complex subunit PAN3
Ppup080280	22	Ornithine decarboxylase antizyme 1
Ppup059780	22	Zinc finger protein swm
Ppup017950	22	Aryl hydrocarbon receptor nuclear translocator homolog
Ppup044590_Ppup044600	22
Ppup176170	22	Trypsin-4
Ppup117110	22	Lipase 1
Ppup146280	21	Protein LSM14 homolog B
Ppup077340	21	Eukaryotic translation initiation factor 4 gamma 2
Ppup014330	21	Non-canonical poly(A) RNA polymerase protein Trf4-1
Ppup028060	21	Cystinosin homolog
Ppup025880	21	Carnitine O-palmitoyltransferase 1, liver isoform
Ppup083190	21	Kynurenine--oxoglutarate transaminase 1
