# Supplementary material for: Comprehensive isoform-level analysis reveals the contribution of alternative isoforms to venom evolution and repertoire diversity
Source: HighWire-hosted journal article supplement (doi:10.1101/gr.277707.123), 2023-09-01
Supplement: Supplemental_Tables_S1_to_S19.zip [file Supplemental_Table_S6.xlsx]

## Sheet: Sheet1
Supplemental Table S6. AS events detected by SUPPA2.
seqname	gene_id	event_id	alternative_transcripts	total_transcripts
Scaffold_0	Ppup138880	Ppup138880;A3:Scaffold_0:687464-687604:687461-687604:-	PB.16.1,PB.16.2,PB.16.3,PB.16.5	PB.16.2,PB.16.4,PB.16.3,PB.16.1,PB.16.5
Scaffold_0	Ppup138970	Ppup138970;A3:Scaffold_0:725058-727189:724520-727189:-	MSTRG.23.4	MSTRG.23.4,MSTRG.23.1
Scaffold_0	Ppup138980	Ppup138980;A3:Scaffold_0:732724-732884:732715-732884:-	PB.21.1,PB.21.22,PB.21.19,PB.21.3,PB.21.15,PB.21.21	PB.21.1,PB.21.14,PB.21.21,PB.21.20,PB.21.10,PB.21.2,PB.21.4,PB.21.7,PB.21.15,PB.21.8,PB.21.5,PB.21.16,PB.21.18,PB.21.9,PB.21.3,PB.21.6,PB.21.22,PB.21.19
Scaffold_0	Ppup138980	Ppup138980;A3:Scaffold_0:731552-731709:731510-731709:-	PB.21.14,PB.21.18,PB.21.9	PB.21.14,PB.21.1,PB.21.20,PB.21.21,PB.21.10,PB.21.2,PB.21.4,PB.21.7,PB.21.15,PB.21.8,PB.21.5,PB.21.16,PB.21.18,PB.21.22,PB.21.3,PB.21.6,PB.21.9,PB.21.19
Scaffold_0	Ppup138980	Ppup138980;A3:Scaffold_0:731840-731993:731822-731993:-	PB.21.7,PB.21.10,PB.21.18	PB.21.1,PB.21.14,PB.21.20,PB.21.21,PB.21.10,PB.21.2,PB.21.7,PB.21.4,PB.21.15,PB.21.8,PB.21.5,PB.21.16,PB.21.9,PB.21.22,PB.21.3,PB.21.6,PB.21.18,PB.21.19
Scaffold_0	Ppup139410	Ppup139410;A3:Scaffold_0:1385440-1389305:1385341-1389305:-	PB.54.1	PB.54.1,PB.54.2
Scaffold_0	Ppup139670	Ppup139670;A3:Scaffold_0:1726179-1726258:1726158-1726258:-	PB.71.1	PB.71.2,PB.71.1
Scaffold_0	Ppup139890	Ppup139890;A3:Scaffold_0:2030413-2030488:2030395-2030488:-	PB.91.3,PB.91.6,PB.91.9	PB.91.4,PB.91.2,PB.91.9,PB.91.5,PB.91.6,PB.91.1,PB.91.7,PB.91.3,PB.91.8
Scaffold_0	Ppup140010	Ppup140010;A3:Scaffold_0:2227770-2230173:2227719-2230173:-	PB.97.1	PB.97.1,PB.97.2
Scaffold_0	Ppup140310	Ppup140310;A3:Scaffold_0:2635395-2637318:2635382-2637318:-	PB.124.3	PB.124.2,PB.124.3
Scaffold_0	Ppup140870	Ppup140870;A3:Scaffold_0:3473203-3473574:3472614-3473574:-	PB.158.7	PB.158.3,PB.158.7,PB.158.12,PB.158.6,PB.158.9,PB.158.4,PB.158.1
Scaffold_0	Ppup140910	Ppup140910;A3:Scaffold_0:3558939-3559030:3558921-3559030:-	PB.162.2	PB.162.1,PB.162.2
Scaffold_0	Ppup141050	Ppup141050;A3:Scaffold_0:4046679-4046769:4046657-4046769:-	PB.175.1,PB.175.3,PB.175.5	PB.175.5,PB.175.3,PB.175.4,PB.175.1
Scaffold_0	Ppup141350	Ppup141350;A3:Scaffold_0:4576436-4577323:4576405-4577323:-	PB.197.1	PB.197.1,PB.197.2,PB.197.4
Scaffold_0	Ppup141670	Ppup141670;A3:Scaffold_0:4723266-4723527:4723245-4723527:-	PB.217.2,PB.217.3,PB.217.7,PB.217.8,PB.217.9,PB.217.10,PB.217.11,PB.217.12,PB.217.13	PB.217.1,PB.217.12,PB.217.14,PB.217.4,PB.217.9,PB.217.11,PB.217.15,PB.217.8,PB.217.2,PB.217.3,PB.217.13,PB.217.16,PB.217.7,PB.217.10
Scaffold_0	Ppup141890	Ppup141890;A3:Scaffold_0:4893311-4897716:4893305-4897716:-	PB.233.2	PB.233.2,PB.233.5
Scaffold_0	Ppup141930	Ppup141930;A3:Scaffold_0:4918509-4918588:4918497-4918588:-	MSTRG.272.2	MSTRG.272.2,MSTRG.272.1
Scaffold_0	novelGeneAS010	novelGeneAS010;A3:Scaffold_0:5778680-5779452:5778676-5779452:-	PB.273.1	PB.273.1,PB.273.2
Scaffold_0	Ppup142570	Ppup142570;A3:Scaffold_0:6022254-6023818:6022251-6023818:-	PB.284.1,PB.284.2,PB.284.3,PB.284.6	PB.284.2,PB.284.1,PB.284.5,PB.284.3,PB.284.6
Scaffold_0	Ppup142610	Ppup142610;A3:Scaffold_0:6075148-6075437:6075079-6075437:-	PB.288.2	PB.288.2,PB.288.3
Scaffold_0	Ppup142720	Ppup142720;A3:Scaffold_0:6243068-6243159:6243065-6243159:-	MSTRG.344.8,MSTRG.344.9	MSTRG.344.9,MSTRG.344.7,MSTRG.344.8
Scaffold_0	Ppup143040_Ppup143030	Ppup143040_Ppup143030;A3:Scaffold_0:6799914-6810110:6799884-6810110:-	PB.329.1,PB.329.3	PB.329.2,PB.329.1,PB.329.3
Scaffold_0	Ppup143040_Ppup143030	Ppup143040_Ppup143030;A3:Scaffold_0:6855012-6884276:6854997-6884276:-	PB.329.3	PB.329.1,PB.329.3
Scaffold_0	Ppup143580	Ppup143580;A3:Scaffold_0:8412251-8412340:8412248-8412340:-	PB.363.1,PB.363.10,PB.363.4,PB.363.5,PB.363.7,PB.363.3,PB.363.2,PB.363.11,PB.363.12,PB.363.13,PB.363.15,PB.363.14,PB.363.18,PB.363.23,PB.363.24,PB.363.25,PB.363.26,PB.363.27,PB.363.28,PB.363.22,PB.363.21,PB.363.19,PB.363.20,PB.363.30,PB.363.31,PB.363.32,PB.363.33	PB.363.22,PB.363.31,PB.363.2,PB.363.27,PB.363.19,PB.363.4,PB.363.24,PB.363.15,PB.363.20,PB.363.28,PB.363.33,PB.363.17,PB.363.14,PB.363.32,PB.363.18,PB.363.1,PB.363.10,PB.363.7,PB.363.21,PB.363.12,PB.363.5,PB.363.11,PB.363.13,PB.363.25,PB.363.30,PB.363.23,PB.363.26,PB.363.3
Scaffold_0	Ppup143580	Ppup143580;A3:Scaffold_0:8417526-8418268:8417517-8418268:-	PB.363.1,PB.363.10,PB.363.4,PB.363.7,PB.363.11,PB.363.12,PB.363.13,PB.363.15,PB.363.17,PB.363.18,PB.363.23,PB.363.24,PB.363.25,PB.363.27,PB.363.28,PB.363.22,PB.363.31,PB.363.32	PB.363.22,PB.363.31,PB.363.27,PB.363.4,PB.363.24,PB.363.15,PB.363.28,PB.363.17,PB.363.32,PB.363.18,PB.363.1,PB.363.10,PB.363.7,PB.363.12,PB.363.5,PB.363.11,PB.363.13,PB.363.25,PB.363.23,PB.363.26
Scaffold_0	Ppup143580	Ppup143580;A3:Scaffold_0:8417248-8417363:8417225-8417363:-	PB.363.10,PB.363.4,PB.363.5,PB.363.7,PB.363.3,PB.363.2,PB.363.11,PB.363.12,PB.363.13,PB.363.15,PB.363.14,PB.363.17,PB.363.18,PB.363.23,PB.363.24,PB.363.25,PB.363.26,PB.363.27,PB.363.28,PB.363.22,PB.363.21,PB.363.19,PB.363.20,PB.363.30,PB.363.31,PB.363.32,PB.363.33,PB.363.38	PB.363.22,PB.363.38,PB.363.31,PB.363.2,PB.363.27,PB.363.19,PB.363.4,PB.363.24,PB.363.15,PB.363.20,PB.363.28,PB.363.33,PB.363.17,PB.363.14,PB.363.32,PB.363.18,PB.363.1,PB.363.10,PB.363.7,PB.363.21,PB.363.12,PB.363.5,PB.363.11,PB.363.13,PB.363.25,PB.363.30,PB.363.23,PB.363.26,PB.363.3
Scaffold_0	Ppup143580	Ppup143580;A3:Scaffold_0:8417526-8419762:8417517-8419762:-	PB.363.3,PB.363.2,PB.363.14,PB.363.19,PB.363.20	PB.363.20,PB.363.14,PB.363.2,PB.363.30,PB.363.19,PB.363.3
Scaffold_0	Ppup143580	Ppup143580;A3:Scaffold_0:8414983-8416913:8414872-8416913:-	PB.363.15,PB.363.23,PB.363.24,PB.363.27,PB.363.21,PB.363.32	PB.363.22,PB.363.31,PB.363.2,PB.363.27,PB.363.19,PB.363.4,PB.363.24,PB.363.15,PB.363.20,PB.363.28,PB.363.33,PB.363.17,PB.363.14,PB.363.32,PB.363.18,PB.363.1,PB.363.10,PB.363.7,PB.363.21,PB.363.12,PB.363.5,PB.363.11,PB.363.13,PB.363.25,PB.363.30,PB.363.23,PB.363.26,PB.363.3
Scaffold_0	Ppup143700	Ppup143700;A3:Scaffold_0:8629304-8630300:8629300-8630300:-	PB.373.3	PB.373.2,PB.373.3
Scaffold_0	Ppup143920	Ppup143920;A3:Scaffold_0:9291204-9291325:9291186-9291325:-	PB.388.6	PB.388.1,PB.388.6
Scaffold_0	Ppup143920	Ppup143920;A3:Scaffold_0:9293735-9293795:9293724-9293795:-	PB.388.10	PB.388.13,PB.388.1,PB.388.11,PB.388.12,PB.388.6,PB.388.10
Scaffold_0	Ppup144340	Ppup144340;A3:Scaffold_0:9949555-9949796:9949530-9949796:-	PB.410.2	PB.410.2,PB.410.1
Scaffold_0	Ppup144360	Ppup144360;A3:Scaffold_0:9966352-9970305:9966346-9970305:-	MSTRG.476.2,MSTRG.476.5,MSTRG.476.7,MSTRG.476.9,MSTRG.476.4	MSTRG.476.2,MSTRG.476.5,MSTRG.476.7,MSTRG.476.3,MSTRG.476.8,MSTRG.476.6,MSTRG.476.4,MSTRG.476.9
Scaffold_0	Ppup144560	Ppup144560;A3:Scaffold_0:10345244-10345972:10345226-10345972:-	PB.427.3	PB.427.1,PB.427.2,PB.427.3
Scaffold_0	Ppup144790	Ppup144790;A3:Scaffold_0:10609808-10609882:10609805-10609882:-	PB.449.1	PB.449.2,PB.449.1
Scaffold_0	Ppup144820	Ppup144820;A3:Scaffold_0:10625705-10626014:10625647-10626014:-	PB.450.2,PB.450.5,PB.450.8,PB.450.9,PB.450.18,PB.450.21	PB.450.10,PB.450.24,PB.450.9,PB.450.21,PB.450.18,PB.450.2,PB.450.8,PB.450.5
Scaffold_0	Ppup145290	Ppup145290;A3:Scaffold_0:11128114-11129178:11128102-11129178:-	PB.486.1	PB.486.3,PB.486.4,PB.486.2,PB.486.1
Scaffold_0	Ppup145510	Ppup145510;A3:Scaffold_0:11450763-11451428:11450747-11451428:-	PB.499.7	PB.499.5,PB.499.16,PB.499.17,PB.499.7
Scaffold_0	Ppup145690	Ppup145690;A3:Scaffold_0:11596572-11597011:11596569-11597011:-	PB.515.1	PB.515.1,PB.515.5
Scaffold_0	Ppup146280	Ppup146280;A3:Scaffold_0:12233829-12234105:12233826-12234105:-	PB.562.21,PB.562.24,PB.562.26,PB.562.27,PB.562.29,PB.562.30,PB.562.31,PB.562.32,PB.562.36,PB.562.37,PB.562.38,PB.562.45,PB.562.49,PB.562.46,PB.562.47,PB.562.52,PB.562.53	PB.562.37,PB.562.5,PB.562.21,PB.562.32,PB.562.46,PB.562.52,PB.562.38,PB.562.30,PB.562.39,PB.562.17,PB.562.47,PB.562.53,PB.562.10,PB.562.26,PB.562.31,PB.562.45,PB.562.36,PB.562.49,PB.562.27,PB.562.29,PB.562.24
Scaffold_0	Ppup146400	Ppup146400;A3:Scaffold_0:12295739-12303530:12295735-12303530:-	PB.575.1,PB.575.3,PB.575.10,PB.575.20,PB.575.24	PB.575.24,PB.575.2,PB.575.3,PB.575.11,PB.575.10,PB.575.1,PB.575.20
Scaffold_0	Ppup146570	Ppup146570;A3:Scaffold_0:12772759-12772848:12772750-12772848:-	PB.587.9,PB.587.8,PB.587.7,PB.587.3,PB.587.1,PB.587.4,PB.587.5,PB.587.2,PB.587.18,PB.587.21,PB.587.23,PB.587.22,PB.587.19,PB.587.20,PB.587.24,PB.587.25,PB.587.26,PB.587.28	PB.587.9,PB.587.21,PB.587.25,PB.587.18,PB.587.8,PB.587.2,PB.587.26,PB.587.10,PB.587.19,PB.587.3,PB.587.20,PB.587.24,PB.587.5,PB.587.6,PB.587.7,PB.587.23,PB.587.28,PB.587.1,PB.587.4,PB.587.22
Scaffold_0	Ppup146590	Ppup146590;A3:Scaffold_0:12782252-12782332:12782227-12782332:-	PB.589.5	PB.589.6,PB.589.5,PB.589.1
Scaffold_0	Ppup146670	Ppup146670;A3:Scaffold_0:12858137-12858751:12858002-12858751:-	PB.598.10,PB.598.11	PB.598.17,PB.598.10,PB.598.11,PB.598.12
Scaffold_0	Ppup146860	Ppup146860;A3:Scaffold_0:13076319-13076435:13076304-13076435:-	PB.610.2,PB.610.4	PB.610.5,PB.610.4,PB.610.3,PB.610.2
Scaffold_0	Ppup146880	Ppup146880;A3:Scaffold_0:13091048-13091107:13091039-13091107:-	PB.612.3	PB.612.2,PB.612.3
Scaffold_0	Ppup147130	Ppup147130;A3:Scaffold_0:13497088-13498173:13496918-13498173:-	PB.629.1	PB.629.2,PB.629.1
Scaffold_0	Ppup138790	Ppup138790;A3:Scaffold_0:405075-405241:405075-405277:+	PB.9.5	PB.9.1,PB.9.5
Scaffold_0	Ppup139070	Ppup139070;A3:Scaffold_0:772012-772156:772012-772167:+	PB.29.7	PB.29.5,PB.29.7,PB.29.1,PB.29.4
Scaffold_0	Ppup139070	Ppup139070;A3:Scaffold_0:778549-779440:778549-779446:+	PB.30.3	PB.30.4,PB.30.3,PB.30.5
Scaffold_0	Ppup139070	Ppup139070;A3:Scaffold_0:778577-779440:778577-779446:+	PB.30.6	PB.30.6,PB.30.2
Scaffold_0	Ppup139120	Ppup139120;A3:Scaffold_0:811655-811736:811655-811739:+	PB.35.4	PB.35.4,PB.35.1,PB.35.3,PB.35.12
Scaffold_0	Ppup139510	Ppup139510;A3:Scaffold_0:1491698-1492131:1491698-1494160:+	PB.58.4	PB.58.1,PB.58.4
Scaffold_0	Ppup139720	Ppup139720;A3:Scaffold_0:1832013-1832958:1832013-1832959:+	PB.75.1	PB.75.1,PB.75.3
Scaffold_0	Ppup140190	Ppup140190;A3:Scaffold_0:2331568-2331887:2331568-2331923:+	PB.113.2	PB.113.1,PB.113.2,PB.113.3
Scaffold_0	Ppup140190	Ppup140190;A3:Scaffold_0:2331568-2331887:2331568-2331899:+	PB.113.2	PB.113.2,PB.113.5,PB.113.4
Scaffold_0	Ppup140190	Ppup140190;A3:Scaffold_0:2331568-2331899:2331568-2331923:+	PB.113.4,PB.113.5	PB.113.1,PB.113.3,PB.113.5,PB.113.4
Scaffold_0	Ppup140230	Ppup140230;A3:Scaffold_0:2353601-2354063:2353601-2354148:+	PB.117.3,PB.117.1	PB.117.2,PB.117.1,PB.117.3
Scaffold_0	Ppup140720	Ppup140720;A3:Scaffold_0:3368363-3369027:3368363-3369133:+	PB.143.4,PB.143.1,PB.143.3	PB.143.5,PB.143.4,PB.143.1,PB.143.3,PB.143.8
Scaffold_0	Ppup140730	Ppup140730;A3:Scaffold_0:3391725-3391989:3391725-3392438:+	PB.144.2,PB.144.1	PB.144.5,PB.144.2,PB.144.7,PB.144.1,PB.144.9
Scaffold_0	Ppup140730	Ppup140730;A3:Scaffold_0:3391725-3392438:3391725-3392683:+	PB.144.9,PB.144.7,PB.144.5	PB.144.5,PB.144.6,PB.144.7,PB.144.8,PB.144.9
Scaffold_0	Ppup140730	Ppup140730;A3:Scaffold_0:3391725-3391989:3391725-3393888:+	PB.144.1	PB.144.1,PB.144.4
Scaffold_0	Ppup140730	Ppup140730;A3:Scaffold_0:3391725-3391989:3391725-3392683:+	PB.144.1	PB.144.8,PB.144.1,PB.144.6
Scaffold_0	Ppup140730	Ppup140730;A3:Scaffold_0:3391725-3392438:3391725-3393888:+	PB.144.7,PB.144.5	PB.144.4,PB.144.5,PB.144.7
Scaffold_0	Ppup140730	Ppup140730;A3:Scaffold_0:3391725-3392683:3391725-3393888:+	PB.144.8,PB.144.6	PB.144.8,PB.144.6,PB.144.4
Scaffold_0	Ppup140730	Ppup140730;A3:Scaffold_0:3391725-3392438:3391725-3394196:+	PB.144.5	PB.144.3,PB.144.5
Scaffold_0	Ppup140730	Ppup140730;A3:Scaffold_0:3391725-3392683:3391725-3394196:+	PB.144.6	PB.144.3,PB.144.6
Scaffold_0	Ppup140770	Ppup140770;A3:Scaffold_0:3416727-3416917:3416727-3417683:+	PB.148.10	PB.148.19,PB.148.12,PB.148.10
Scaffold_0	Ppup140770	Ppup140770;A3:Scaffold_0:3412296-3416917:3412296-3417683:+	PB.148.11,PB.148.5	PB.148.13,PB.148.25,PB.148.11,PB.148.5
Scaffold_0	Ppup140770	Ppup140770;A3:Scaffold_0:3412296-3416586:3412296-3416917:+	PB.148.8,PB.148.6	PB.148.6,PB.148.8,PB.148.11,PB.148.5
Scaffold_0	Ppup140770	Ppup140770;A3:Scaffold_0:3412296-3416586:3412296-3417683:+	PB.148.8,PB.148.6	PB.148.6,PB.148.8,PB.148.13,PB.148.25
Scaffold_0	Ppup140770	Ppup140770;A3:Scaffold_0:3412296-3417683:3412296-3418230:+	PB.148.13	PB.148.32,PB.148.13,PB.148.26
Scaffold_0	Ppup140770	Ppup140770;A3:Scaffold_0:3412296-3416917:3412296-3418230:+	PB.148.5	PB.148.32,PB.148.26,PB.148.5
Scaffold_0	Ppup140770	Ppup140770;A3:Scaffold_0:3412296-3419324:3412296-3420857:+	PB.148.1	PB.148.1,PB.148.28
Scaffold_0	Ppup140770	Ppup140770;A3:Scaffold_0:3412296-3423553:3412296-3423895:+	PB.148.2	PB.148.23,PB.148.7,PB.148.2
Scaffold_0	Ppup140770	Ppup140770;A3:Scaffold_0:3412296-3423895:3412296-3424700:+	PB.148.7	PB.148.7,PB.148.22,PB.148.16
Scaffold_0	Ppup140860	Ppup140860;A3:Scaffold_0:3467530-3467600:3467530-3467620:+	PB.157.1	PB.157.2,PB.157.3,PB.157.1
Scaffold_0	Ppup141450	Ppup141450;A3:Scaffold_0:4612251-4612340:4612251-4612367:+	MSTRG.223.2	MSTRG.223.1,MSTRG.223.2
Scaffold_0	Ppup141450	Ppup141450;A3:Scaffold_0:4614513-4614594:4614513-4614597:+	MSTRG.223.3	MSTRG.223.3,MSTRG.223.2,MSTRG.223.1
Scaffold_0	Ppup141460	Ppup141460;A3:Scaffold_0:4617574-4617666:4617574-4617680:+	PB.201.10	PB.201.7,PB.201.8,PB.201.10,PB.201.9
Scaffold_0	Ppup141460	Ppup141460;A3:Scaffold_0:4618420-4618502:4618420-4618508:+	PB.201.5,PB.201.8	PB.201.6,PB.201.8,PB.201.5
Scaffold_0	Ppup141580	Ppup141580;A3:Scaffold_0:4694982-4695675:4694982-4695705:+	PB.212.3	PB.212.1,PB.212.3,PB.212.2
Scaffold_0	Ppup141660	Ppup141660;A3:Scaffold_0:4714699-4714779:4714699-4714800:+	PB.216.2	PB.216.2,PB.216.3
Scaffold_0	Ppup141800	Ppup141800;A3:Scaffold_0:4791351-4799479:4791351-4799508:+	PB.225.14,PB.225.1,PB.225.3,PB.225.2,PB.225.10,PB.225.12,PB.225.7,PB.225.6,PB.225.5,PB.225.4	PB.225.14,PB.225.5,PB.225.12,PB.225.2,PB.225.4,PB.225.1,PB.225.6,PB.225.3,PB.225.10,PB.225.13,PB.225.7
Scaffold_0	Ppup141800	Ppup141800;A3:Scaffold_0:4813651-4820010:4813651-4820037:+	PB.225.10	PB.225.32,PB.225.18,PB.225.4,PB.225.29,PB.225.23,PB.225.94,PB.225.6,PB.225.22,PB.225.12,PB.225.13,PB.225.52,PB.225.36,PB.225.38,PB.225.15,PB.225.35,PB.225.28,PB.225.10,PB.225.43,PB.225.5,PB.225.20,PB.225.82,PB.225.7
Scaffold_0	Ppup141990	Ppup141990;A3:Scaffold_0:5135989-5136317:5135989-5136413:+	PB.241.1,PB.241.2,PB.241.13,PB.241.3,PB.241.19,PB.241.4,PB.241.6,PB.241.25,PB.241.26	PB.241.4,PB.241.13,PB.241.3,PB.241.25,PB.241.26,PB.241.6,PB.241.5,PB.241.1,PB.241.19,PB.241.2
Scaffold_0	Ppup142050_Ppup142060	Ppup142050_Ppup142060;A3:Scaffold_0:5209917-5210624:5209917-5210639:+	PB.244.6,PB.244.28,PB.244.51	PB.244.49,PB.244.33,PB.244.51,PB.244.20,PB.244.11,PB.244.6,PB.244.17,PB.244.28
Scaffold_0	Ppup142050_Ppup142060	Ppup142050_Ppup142060;A3:Scaffold_0:5173773-5175532:5173773-5175568:+	PB.244.52,PB.244.24	PB.244.52,PB.244.27,PB.244.24
Scaffold_0	Ppup142050_Ppup142060	Ppup142050_Ppup142060;A3:Scaffold_0:5173773-5175471:5173773-5175532:+	PB.244.28	PB.244.52,PB.244.24,PB.244.28
Scaffold_0	Ppup142050_Ppup142060	Ppup142050_Ppup142060;A3:Scaffold_0:5173773-5175471:5173773-5175568:+	PB.244.28	PB.244.27,PB.244.28
Scaffold_0	Ppup142050_Ppup142060	Ppup142050_Ppup142060;A3:Scaffold_0:5173788-5175532:5173788-5175568:+	PB.244.49	PB.244.49,PB.244.34
Scaffold_0	Ppup142050_Ppup142060_Ppup142070	Ppup142050_Ppup142060_Ppup142070;A3:Scaffold_0:5209917-5210624:5209917-5210639:+	PB.244.8,PB.244.22,PB.244.12,PB.244.14,PB.244.26,PB.244.39,PB.244.40,PB.244.42,PB.244.46,PB.244.53	PB.244.5,PB.244.14,PB.244.45,PB.244.22,PB.244.8,PB.244.42,PB.244.46,PB.244.12,PB.244.44,PB.244.40,PB.244.43,PB.244.53,PB.244.39,PB.244.26
Scaffold_0	Ppup142050_Ppup142060_Ppup142070	Ppup142050_Ppup142060_Ppup142070;A3:Scaffold_0:5173773-5175532:5173773-5175568:+	PB.244.26,PB.244.39,PB.244.40,PB.244.44	PB.244.45,PB.244.44,PB.244.40,PB.244.53,PB.244.39,PB.244.26
Scaffold_0	Ppup142050_Ppup142060_Ppup142070	Ppup142050_Ppup142060_Ppup142070;A3:Scaffold_0:5173773-5175471:5173773-5175532:+	PB.244.43	PB.244.44,PB.244.40,PB.244.43,PB.244.39,PB.244.26
Scaffold_0	Ppup142050_Ppup142060_Ppup142070	Ppup142050_Ppup142060_Ppup142070;A3:Scaffold_0:5173773-5175471:5173773-5175568:+	PB.244.43	PB.244.53,PB.244.43,PB.244.45
Scaffold_0	Ppup142520	Ppup142520;A3:Scaffold_0:5895154-5895222:5895154-5895311:+	PB.279.3,PB.279.1	PB.279.2,PB.279.3,PB.279.12,PB.279.7,PB.279.10,PB.279.11,PB.279.1
Scaffold_0	Ppup142530	Ppup142530;A3:Scaffold_0:5930830-5931491:5930830-5931494:+	PB.280.5	PB.280.5,PB.280.3
Scaffold_0	Ppup142530	Ppup142530;A3:Scaffold_0:5930830-5931491:5930830-5931516:+	PB.280.5	PB.280.5,PB.280.4
Scaffold_0	Ppup142530	Ppup142530;A3:Scaffold_0:5930830-5931494:5930830-5931516:+	PB.280.3	PB.280.4,PB.280.3
Scaffold_0	Ppup142860	Ppup142860;A3:Scaffold_0:6475509-6475583:6475509-6475586:+	PB.310.1	PB.310.2,PB.310.1
Scaffold_0	Ppup143120	Ppup143120;A3:Scaffold_0:7150911-7151656:7150911-7151657:+	PB.336.1,PB.336.2,PB.336.3,PB.336.5,PB.336.8	PB.336.3,PB.336.2,PB.336.8,PB.336.1,PB.336.5,PB.336.4
Scaffold_0	Ppup143330	Ppup143330;A3:Scaffold_0:7865900-7865996:7865900-7866011:+	PB.350.3	PB.350.1,PB.350.3
Scaffold_0	novelGeneAS013	novelGeneAS013;A3:Scaffold_0:8031369-8031460:8031369-8031476:+	PB.357.2,PB.357.1	PB.357.5,PB.357.1,PB.357.3,PB.357.2
Scaffold_0	Ppup143660	Ppup143660;A3:Scaffold_0:8465287-8465700:8465287-8465802:+	PB.370.15	PB.370.18,PB.370.15
Scaffold_0	Ppup143800	Ppup143800;A3:Scaffold_0:9111966-9112045:9111966-9112059:+	PB.381.7	PB.381.7,PB.381.3
Scaffold_0	Ppup144180	Ppup144180;A3:Scaffold_0:9582516-9584231:9582516-9584267:+	PB.398.23	PB.398.23,PB.398.25
Scaffold_0	Ppup144200	Ppup144200;A3:Scaffold_0:9641380-9641594:9641380-9642001:+	PB.399.8	PB.399.7,PB.399.9,PB.399.8,PB.399.11,PB.399.10
Scaffold_0	Ppup144200	Ppup144200;A3:Scaffold_0:9640111-9640826:9640111-9640846:+	PB.399.9	PB.399.7,PB.399.9,PB.399.5,PB.399.8,PB.399.10,PB.399.6,PB.399.4
Scaffold_0	Ppup144260	Ppup144260;A3:Scaffold_0:9828990-9829377:9828990-9829378:+	PB.404.3	PB.404.1,PB.404.3
Scaffold_0	Ppup144420	Ppup144420;A3:Scaffold_0:10042649-10043133:10042649-10043151:+	PB.415.10	PB.415.6,PB.415.1,PB.415.9,PB.415.8,PB.415.3,PB.415.2,PB.415.10,PB.415.11
Scaffold_0	Ppup144420	Ppup144420;A3:Scaffold_0:10040345-10040944:10040345-10040947:+	PB.415.11,PB.415.5,PB.415.9,PB.415.8	PB.415.9,PB.415.8,PB.415.10,PB.415.5,PB.415.11
Scaffold_0	Ppup144440	Ppup144440;A3:Scaffold_0:10057581-10057956:10057581-10057997:+	PB.417.3	PB.417.3,PB.417.4
Scaffold_0	Ppup144610	Ppup144610;A3:Scaffold_0:10380834-10381273:10380834-10381282:+	PB.432.2,PB.432.1,PB.432.3,PB.432.5,PB.432.8,PB.432.6,PB.432.7,PB.432.9,PB.432.10,PB.432.11,PB.432.17	PB.432.4,PB.432.1,PB.432.17,PB.432.11,PB.432.8,PB.432.10,PB.432.6,PB.432.9,PB.432.7,PB.432.2,PB.432.3,PB.432.5
Scaffold_0	Ppup144720	Ppup144720;A3:Scaffold_0:10534064-10534128:10534064-10534144:+	PB.440.1	PB.440.3,PB.440.2,PB.440.1
Scaffold_0	Ppup144730_Ppup144740	Ppup144730_Ppup144740;A3:Scaffold_0:10572304-10573874:10572304-10573937:+	PB.441.3	PB.441.8,PB.441.5,PB.441.6,PB.441.3
Scaffold_0	Ppup144730_Ppup144740	Ppup144730_Ppup144740;A3:Scaffold_0:10572304-10573874:10572304-10573934:+	PB.441.3	PB.441.4,PB.441.3
Scaffold_0	Ppup144730_Ppup144740	Ppup144730_Ppup144740;A3:Scaffold_0:10572304-10573934:10572304-10573937:+	PB.441.4	PB.441.8,PB.441.5,PB.441.6,PB.441.4
Scaffold_0	Ppup144970	Ppup144970;A3:Scaffold_0:10701328-10701413:10701328-10701428:+	PB.462.2,PB.462.3,PB.462.5,PB.462.8,PB.462.7	PB.462.7,PB.462.5,PB.462.2,PB.462.3,PB.462.1,PB.462.8
Scaffold_0	Ppup145280	Ppup145280;A3:Scaffold_0:11106678-11106768:11106678-11106783:+	MSTRG.559.3	MSTRG.559.3,MSTRG.559.2
Scaffold_0	Ppup145500	Ppup145500;A3:Scaffold_0:11442229-11442303:11442229-11442326:+	PB.498.14	PB.498.14,PB.498.13
Scaffold_0	Ppup145910	Ppup145910;A3:Scaffold_0:11819825-11819846:11819825-11819848:+	MSTRG.612.2	MSTRG.612.2,MSTRG.612.3
Scaffold_0	Ppup145980	Ppup145980;A3:Scaffold_0:11920885-11921135:11920885-11921147:+	PB.540.6,PB.540.5	PB.540.5,PB.540.1,PB.540.6
Scaffold_0	Ppup146520	Ppup146520;A3:Scaffold_0:12521202-12521269:12521202-12521283:+	PB.581.5,PB.581.4	PB.581.3,PB.581.4,PB.581.5
Scaffold_0	Ppup146520	Ppup146520;A3:Scaffold_0:12521501-12521588:12521501-12521601:+	PB.581.5,PB.581.1,PB.581.2,PB.581.4	PB.581.2,PB.581.1,PB.581.3,PB.581.5,PB.581.4
Scaffold_0	Ppup146750	Ppup146750;A3:Scaffold_0:12900289-12900356:12900289-12900365:+	PB.604.5	PB.604.2,PB.604.5
Scaffold_0	Ppup147120	Ppup147120;A3:Scaffold_0:13491393-13491849:13491393-13491961:+	PB.628.11,PB.628.15,PB.628.16,PB.628.22	PB.628.11,PB.628.9,PB.628.15,PB.628.22,PB.628.16
Scaffold_0	Ppup147120	Ppup147120;A3:Scaffold_0:13490583-13490650:13490583-13490692:+	PB.628.15,PB.628.8	PB.628.8,PB.628.5,PB.628.15,PB.628.16
Scaffold_0	Ppup147120	Ppup147120;A3:Scaffold_0:13491393-13491825:13491393-13491849:+	PB.628.7,PB.628.8	PB.628.11,PB.628.8,PB.628.7,PB.628.15,PB.628.22,PB.628.16
Scaffold_0	Ppup147120	Ppup147120;A3:Scaffold_0:13491393-13491825:13491393-13491961:+	PB.628.7,PB.628.8	PB.628.7,PB.628.9,PB.628.8
Scaffold_1	Ppup042910	Ppup042910;A3:Scaffold_1:21417-22420:21417-22423:+	PB.632.1,PB.632.8,PB.632.4,PB.632.3	PB.632.4,PB.632.8,PB.632.2,PB.632.3,PB.632.1
Scaffold_1	Ppup042910	Ppup042910;A3:Scaffold_1:13932-14111:13932-14115:+	PB.632.2,PB.632.8,PB.632.4,PB.632.7,PB.632.3,PB.632.6	PB.632.4,PB.632.8,PB.632.6,PB.632.2,PB.632.3,PB.632.1,PB.632.7
Scaffold_1	Ppup042930	Ppup042930;A3:Scaffold_1:29083-29346:29083-29640:+	PB.633.4	PB.633.2,PB.633.4,PB.633.5,PB.633.3
Scaffold_1	Ppup043390	Ppup043390;A3:Scaffold_1:406085-408818:406085-408961:+	PB.659.2	PB.659.1,PB.659.2
Scaffold_1	Ppup043390	Ppup043390;A3:Scaffold_1:406085-408818:406085-408905:+	PB.659.2	PB.659.3,PB.659.2
Scaffold_1	Ppup043390	Ppup043390;A3:Scaffold_1:406085-408905:406085-408961:+	PB.659.3	PB.659.3,PB.659.1
Scaffold_1	Ppup043550	Ppup043550;A3:Scaffold_1:628419-628496:628419-628526:+	MSTRG.785.1	MSTRG.785.1,MSTRG.785.2
Scaffold_1	Ppup043560	Ppup043560;A3:Scaffold_1:634296-634741:634296-634768:+	PB.675.8	PB.675.6,PB.675.8,PB.675.9,PB.675.5,PB.675.1
Scaffold_1	Ppup043690	Ppup043690;A3:Scaffold_1:768812-771866:768812-771981:+	PB.684.3	PB.684.3,PB.684.2
Scaffold_1	Ppup043740	Ppup043740;A3:Scaffold_1:1067823-1068070:1067823-1068562:+	MSTRGCarcass.848.2	MSTRGCarcass.848.2,MSTRGCarcass.848.4
Scaffold_1	Ppup044590_Ppup044600	Ppup044590_Ppup044600;A3:Scaffold_1:2669348-2670393:2669348-2670405:+	PB.731.1,PB.731.2,PB.731.3,PB.731.13,PB.731.19,PB.731.21,PB.731.25	PB.731.2,PB.731.9,PB.731.13,PB.731.25,PB.731.3,PB.731.19,PB.731.4,PB.731.5,PB.731.21,PB.731.23,PB.731.1,PB.731.22
Scaffold_1	Ppup044590_Ppup044600	Ppup044590_Ppup044600;A3:Scaffold_1:2669285-2670390:2669285-2670405:+	PB.731.6,PB.731.20	PB.731.10,PB.731.24,PB.731.15,PB.731.20,PB.731.6,PB.731.7
Scaffold_1	Ppup044590_Ppup044600	Ppup044590_Ppup044600;A3:Scaffold_1:2669285-2670390:2669285-2670393:+	PB.731.6,PB.731.20	PB.731.20,PB.731.14,PB.731.6
Scaffold_1	Ppup044590_Ppup044600	Ppup044590_Ppup044600;A3:Scaffold_1:2669348-2670390:2669348-2670393:+	PB.731.12	PB.731.2,PB.731.13,PB.731.25,PB.731.3,PB.731.19,PB.731.12,PB.731.21,PB.731.1
Scaffold_1	Ppup044590_Ppup044600	Ppup044590_Ppup044600;A3:Scaffold_1:2669348-2670390:2669348-2670405:+	PB.731.12	PB.731.9,PB.731.12,PB.731.4,PB.731.5,PB.731.23,PB.731.22
Scaffold_1	Ppup044590_Ppup044600	Ppup044590_Ppup044600;A3:Scaffold_1:2669285-2670393:2669285-2670405:+	PB.731.14	PB.731.14,PB.731.24,PB.731.10,PB.731.15,PB.731.7
Scaffold_1	Ppup044750	Ppup044750;A3:Scaffold_1:2948176-2948331:2948176-2948388:+	PB.742.1,PB.742.3,PB.742.54,PB.742.8,PB.742.9,PB.742.23,PB.742.26,PB.742.28,PB.742.29,PB.742.33,PB.742.35,PB.742.36,PB.742.37,PB.742.38,PB.742.39,PB.742.40,PB.742.44,PB.742.45,PB.742.46,PB.742.47,PB.742.50,PB.742.51,PB.742.64,PB.742.66,PB.742.67,PB.742.68,PB.742.69,PB.742.7,PB.742.73	PB.742.33,PB.742.67,PB.742.1,PB.742.46,PB.742.36,PB.742.66,PB.742.39,PB.742.37,PB.742.45,PB.742.50,PB.742.47,PB.742.9,PB.742.40,PB.742.7,PB.742.64,PB.742.38,PB.742.28,PB.742.48,PB.742.8,PB.742.73,PB.742.29,PB.742.69,PB.742.68,PB.742.23,PB.742.54,PB.742.44,PB.742.35,PB.742.51,PB.742.26,PB.742.3
Scaffold_1	Ppup044750	Ppup044750;A3:Scaffold_1:2949412-2949490:2949412-2949501:+	PB.742.1,PB.742.3,PB.742.13,PB.742.20,PB.742.22,PB.742.28,PB.742.29,PB.742.33,PB.742.35,PB.742.37,PB.742.38,PB.742.40,PB.742.44,PB.742.45,PB.742.46,PB.742.48,PB.742.51,PB.742.57,PB.742.65,PB.742.66,PB.742.67,PB.742.68,PB.742.69,PB.742.7,PB.742.73	PB.742.13,PB.742.33,PB.742.67,PB.742.1,PB.742.46,PB.742.66,PB.742.37,PB.742.45,PB.742.50,PB.742.57,PB.742.65,PB.742.40,PB.742.7,PB.742.38,PB.742.28,PB.742.48,PB.742.73,PB.742.29,PB.742.69,PB.742.68,PB.742.44,PB.742.22,PB.742.35,PB.742.20,PB.742.51,PB.742.3
Scaffold_1	Ppup044750	Ppup044750;A3:Scaffold_1:2947589-2947674:2947589-2948039:+	PB.742.71,PB.742.28,PB.742.29,PB.742.39,PB.742.40,PB.742.44,PB.742.57	PB.742.29,PB.742.57,PB.742.44,PB.742.51,PB.742.39,PB.742.71,PB.742.40,PB.742.28
Scaffold_1	Ppup046570	Ppup046570;A3:Scaffold_1:6802436-6802787:6802436-6802802:+	PB.840.3	PB.840.3,PB.840.2
Scaffold_1	Ppup046890	Ppup046890;A3:Scaffold_1:7266431-7266527:7266431-7266530:+	PB.856.3,PB.856.5	PB.856.9,PB.856.5,PB.856.1,PB.856.3
Scaffold_1	Ppup046980	Ppup046980;A3:Scaffold_1:7303656-7303729:7303656-7303732:+	PB.863.1,PB.863.3,PB.863.8,PB.863.9	PB.863.8,PB.863.3,PB.863.6,PB.863.9,PB.863.1
Scaffold_1	Ppup043440	Ppup043440;A3:Scaffold_1:451991-452329:451988-452329:-	PB.663.1	PB.663.1,PB.663.2
Scaffold_1	Ppup043530	Ppup043530;A3:Scaffold_1:587879-588170:587873-588170:-	PB.673.6	PB.673.8,PB.673.4,PB.673.6,PB.673.2
Scaffold_1	Ppup043600	Ppup043600;A3:Scaffold_1:678191-679497:678136-679497:-	PB.680.13	PB.680.11,PB.680.1,PB.680.10,PB.680.14,PB.680.4,PB.680.13
Scaffold_1	Ppup044210	Ppup044210;A3:Scaffold_1:1921773-1922030:1921759-1922030:-	PB.718.2	PB.718.2,PB.718.3
Scaffold_1	Ppup044260	Ppup044260;A3:Scaffold_1:1944893-1944990:1944890-1944990:-	MSTRG.843.2	MSTRG.843.2,MSTRG.843.1
Scaffold_1	Ppup044260	Ppup044260;A3:Scaffold_1:1944907-1944990:1944890-1944990:-	MSTRG.843.3	MSTRG.843.3,MSTRG.843.1
Scaffold_1	Ppup044260	Ppup044260;A3:Scaffold_1:1944907-1944990:1944893-1944990:-	MSTRG.843.3	MSTRG.843.3,MSTRG.843.2
Scaffold_1	Ppup044420	Ppup044420;A3:Scaffold_1:2139961-2141208:2139958-2141208:-	MSTRG.853.2	MSTRG.853.2,MSTRG.853.1
Scaffold_1	Ppup044730	Ppup044730;A3:Scaffold_1:2870373-2870484:2870278-2870484:-	PB.740.2	PB.740.2,PB.740.3
Scaffold_1	Ppup044730	Ppup044730;A3:Scaffold_1:2870382-2870484:2870373-2870484:-	PB.740.4	PB.740.4,PB.740.2
Scaffold_1	Ppup044730	Ppup044730;A3:Scaffold_1:2870382-2870484:2870278-2870484:-	PB.740.4	PB.740.4,PB.740.3
Scaffold_1	Ppup045250	Ppup045250;A3:Scaffold_1:4143849-4143943:4143831-4143943:-	PB.767.2	PB.767.2,PB.767.1
Scaffold_1	Ppup046190	Ppup046190;A3:Scaffold_1:6097302-6097579:6097290-6097579:-	PB.821.6	PB.821.11,PB.821.3,PB.821.5,PB.821.9,PB.821.6,PB.821.2,PB.821.10,PB.821.8,PB.821.7
Scaffold_1	Ppup046270	Ppup046270;A3:Scaffold_1:6155438-6155612:6155432-6155612:-	PB.825.4	PB.825.7,PB.825.4
Scaffold_1	Ppup047070	Ppup047070;A3:Scaffold_1:7357349-7357446:7357340-7357446:-	PB.870.2,PB.870.6	PB.870.2,PB.870.6,PB.870.8
Scaffold_10	Ppup103510	Ppup103510;A3:Scaffold_10:101741-102440:101741-102551:+	PB.3461.7	PB.3461.7,PB.3461.3,PB.3461.6
Scaffold_10	Ppup103510	Ppup103510;A3:Scaffold_10:121159-124887:121159-124889:+	PB.3461.13	PB.3461.13,PB.3461.2
Scaffold_10	Ppup103510	Ppup103510;A3:Scaffold_10:138234-138911:138234-138915:+	PB.3461.19,PB.3461.21	PB.3461.23,PB.3461.19,PB.3461.21
Scaffold_10	Ppup103510	Ppup103510;A3:Scaffold_10:137581-137676:137581-137693:+	PB.3461.23	PB.3461.23,PB.3461.21
Scaffold_10	Ppup103510	Ppup103510;A3:Scaffold_10:146063-146508:146063-146511:+	PB.3461.15	PB.3461.13,PB.3461.2,PB.3461.15,PB.3461.17,PB.3461.24,PB.3461.16
Scaffold_10	Ppup104630	Ppup104630;A3:Scaffold_10:1743070-1743152:1743070-1743167:+	PB.3544.2,PB.3544.3,PB.3544.7	PB.3544.3,PB.3544.11,PB.3544.4,PB.3544.2,PB.3544.8,PB.3544.9,PB.3544.7
Scaffold_10	Ppup104710	Ppup104710;A3:Scaffold_10:1884615-1885508:1884615-1885842:+	PB.3547.1	PB.3547.1,PB.3547.7,PB.3547.5
Scaffold_10	Ppup105000	Ppup105000;A3:Scaffold_10:2092534-2092604:2092534-2093023:+	PB.3569.3	PB.3569.2,PB.3569.3
Scaffold_10	Ppup105220	Ppup105220;A3:Scaffold_10:2465806-2465885:2465806-2465909:+	MSTRG.1235.1	MSTRG.1235.4,MSTRG.1235.1
Scaffold_10	Ppup105470	Ppup105470;A3:Scaffold_10:2628422-2628503:2628422-2628506:+	PB.3606.2,PB.3606.3,PB.3606.5	PB.3606.5,PB.3606.2,PB.3606.3,PB.3606.4
Scaffold_10	Ppup105720_Ppup105730	Ppup105720_Ppup105730;A3:Scaffold_10:3141404-3141470:3141404-3141479:+	PB.3624.2	PB.3624.2,PB.3624.1
Scaffold_10	Ppup105740	Ppup105740;A3:Scaffold_10:3190641-3191364:3190641-3191394:+	PB.3625.1,PB.3625.6	PB.3625.4,PB.3625.2,PB.3625.6,PB.3625.1
Scaffold_10	Ppup105750	Ppup105750;A3:Scaffold_10:3197488-3205405:3197488-3205425:+	PB.3626.1	PB.3626.2,PB.3626.1
Scaffold_10	Ppup105870	Ppup105870;A3:Scaffold_10:3528880-3528958:3528880-3528970:+	PB.3635.6,PB.3635.12,PB.3635.2,PB.3635.5,PB.3635.1,PB.3635.15,PB.3635.21,PB.3635.22,PB.3635.24,PB.3635.25,PB.3635.30,PB.3635.31	PB.3635.5,PB.3635.2,PB.3635.24,PB.3635.12,PB.3635.25,PB.3635.1,PB.3635.29,PB.3635.31,PB.3635.6,PB.3635.15,PB.3635.22,PB.3635.21,PB.3635.30
Scaffold_10	Ppup105870	Ppup105870;A3:Scaffold_10:3530731-3530800:3530731-3530811:+	PB.3635.12,PB.3635.2,PB.3635.32,PB.3635.4,PB.3635.5,PB.3635.10,PB.3635.1,PB.3635.15,PB.3635.18,PB.3635.19,PB.3635.20,PB.3635.21,PB.3635.22,PB.3635.23,PB.3635.24,PB.3635.25,PB.3635.26,PB.3635.27,PB.3635.29,PB.3635.30,PB.3635.51,PB.3635.52,PB.3635.53	PB.3635.12,PB.3635.25,PB.3635.29,PB.3635.53,PB.3635.1,PB.3635.15,PB.3635.22,PB.3635.51,PB.3635.52,PB.3635.20,PB.3635.30,PB.3635.27,PB.3635.5,PB.3635.26,PB.3635.18,PB.3635.32,PB.3635.2,PB.3635.24,PB.3635.10,PB.3635.31,PB.3635.19,PB.3635.23,PB.3635.21,PB.3635.4
Scaffold_10	Ppup105870	Ppup105870;A3:Scaffold_10:3531532-3531582:3531532-3531601:+	PB.3635.10	PB.3635.27,PB.3635.24,PB.3635.25,PB.3635.10,PB.3635.1,PB.3635.29,PB.3635.31,PB.3635.53,PB.3635.23,PB.3635.22,PB.3635.28,PB.3635.46,PB.3635.20
Scaffold_10	Ppup105870	Ppup105870;A3:Scaffold_10:3531532-3531582:3531532-3531612:+	PB.3635.10	PB.3635.10,PB.3635.30
Scaffold_10	Ppup105870	Ppup105870;A3:Scaffold_10:3531532-3531601:3531532-3531612:+	PB.3635.1,PB.3635.20,PB.3635.22,PB.3635.23,PB.3635.24,PB.3635.25,PB.3635.27,PB.3635.28,PB.3635.29,PB.3635.31,PB.3635.46,PB.3635.53	PB.3635.27,PB.3635.24,PB.3635.30,PB.3635.25,PB.3635.1,PB.3635.29,PB.3635.31,PB.3635.53,PB.3635.23,PB.3635.22,PB.3635.28,PB.3635.46,PB.3635.20
Scaffold_10	Ppup105970	Ppup105970;A3:Scaffold_10:3588594-3588958:3588594-3588976:+	PB.3643.1,PB.3643.2	PB.3643.2,PB.3643.3,PB.3643.1
Scaffold_10	Ppup106070	Ppup106070;A3:Scaffold_10:3775940-3776191:3775940-3776209:+	PB.3654.2,PB.3654.13,PB.3654.16,PB.3654.8,PB.3654.23,PB.3654.24	PB.3654.5,PB.3654.11,PB.3654.23,PB.3654.16,PB.3654.13,PB.3654.24,PB.3654.12,PB.3654.9,PB.3654.8,PB.3654.1,PB.3654.25,PB.3654.6,PB.3654.2
Scaffold_10	Ppup106070	Ppup106070;A3:Scaffold_10:3776491-3777170:3776491-3778360:+	PB.3654.16,PB.3654.5	PB.3654.5,PB.3654.11,PB.3654.23,PB.3654.16,PB.3654.24,PB.3654.26,PB.3654.9,PB.3654.8,PB.3654.1,PB.3654.25,PB.3654.6,PB.3654.2
Scaffold_10	Ppup106100	Ppup106100;A3:Scaffold_10:3795256-3795346:3795256-3795355:+	PB.3657.1,PB.3657.4,PB.3657.5,PB.3657.7,PB.3657.10,PB.3657.8,PB.3657.9,PB.3657.12	PB.3657.10,PB.3657.5,PB.3657.8,PB.3657.9,PB.3657.4,PB.3657.11,PB.3657.7,PB.3657.1,PB.3657.12
Scaffold_10	Ppup106390	Ppup106390;A3:Scaffold_10:4030154-4030482:4030154-4030500:+	PB.3677.4	PB.3677.1,PB.3677.5,PB.3677.4
Scaffold_10	Ppup106580	Ppup106580;A3:Scaffold_10:4253370-4255308:4253370-4255321:+	PB.3684.1	PB.3684.2,PB.3684.1
Scaffold_10	Ppup106660	Ppup106660;A3:Scaffold_10:4281539-4281806:4281539-4281814:+	PB.3688.2	PB.3688.4,PB.3688.5,PB.3688.2,PB.3688.1
Scaffold_10	Ppup106780_Ppup106760	Ppup106780_Ppup106760;A3:Scaffold_10:4364474-4364548:4364474-4364566:+	PB.3693.4	PB.3693.5,PB.3693.4
Scaffold_10	Ppup103600	Ppup103600;A3:Scaffold_10:254614-255083:253396-255083:-	PB.3465.20	PB.3465.6,PB.3465.20
Scaffold_10	Ppup103600	Ppup103600;A3:Scaffold_10:267341-272272:267122-272272:-	PB.3465.23	PB.3465.23,PB.3465.24,PB.3465.27
Scaffold_10	novelGeneAS031	novelGeneAS031;A3:Scaffold_10:919904-920553:918608-920553:-	MSTRG.1125.10,MSTRG.1125.7	MSTRG.1125.10,MSTRG.1125.7,MSTRG.1125.12
Scaffold_10	novelGeneAS031	novelGeneAS031;A3:Scaffold_10:919904-920553:918392-920553:-	MSTRG.1125.10,MSTRG.1125.7	MSTRG.1125.10,MSTRG.1125.14,MSTRG.1125.7,MSTRG.1125.8
Scaffold_10	novelGeneAS031	novelGeneAS031;A3:Scaffold_10:919904-920553:918500-920553:-	MSTRG.1125.10,MSTRG.1125.7	MSTRG.1125.15,MSTRG.1125.10,MSTRG.1125.9,MSTRG.1125.7
Scaffold_10	novelGeneAS031	novelGeneAS031;A3:Scaffold_10:919904-920553:918284-920553:-	MSTRG.1125.10,MSTRG.1125.7	MSTRG.1125.10,MSTRG.1125.7,MSTRG.1125.6
Scaffold_10	novelGeneAS031	novelGeneAS031;A3:Scaffold_10:920336-920553:919904-920553:-	MSTRG.1125.11	MSTRG.1125.10,MSTRG.1125.11,MSTRG.1125.7
Scaffold_10	novelGeneAS031	novelGeneAS031;A3:Scaffold_10:920336-920553:918608-920553:-	MSTRG.1125.11	MSTRG.1125.11,MSTRG.1125.12
Scaffold_10	novelGeneAS031	novelGeneAS031;A3:Scaffold_10:920336-920553:918392-920553:-	MSTRG.1125.11	MSTRG.1125.11,MSTRG.1125.14,MSTRG.1125.8
Scaffold_10	novelGeneAS031	novelGeneAS031;A3:Scaffold_10:920336-920553:918500-920553:-	MSTRG.1125.11	MSTRG.1125.15,MSTRG.1125.11,MSTRG.1125.9
Scaffold_10	novelGeneAS031	novelGeneAS031;A3:Scaffold_10:920336-920553:920012-920553:-	MSTRG.1125.11	MSTRG.1125.11,MSTRG.1125.5
Scaffold_10	novelGeneAS031	novelGeneAS031;A3:Scaffold_10:920336-920553:918284-920553:-	MSTRG.1125.11	MSTRG.1125.11,MSTRG.1125.6
Scaffold_10	novelGeneAS031	novelGeneAS031;A3:Scaffold_10:918608-920553:918392-920553:-	MSTRG.1125.12	MSTRG.1125.14,MSTRG.1125.8,MSTRG.1125.12
Scaffold_10	novelGeneAS031	novelGeneAS031;A3:Scaffold_10:918608-920553:918500-920553:-	MSTRG.1125.12	MSTRG.1125.15,MSTRG.1125.9,MSTRG.1125.12
Scaffold_10	novelGeneAS031	novelGeneAS031;A3:Scaffold_10:918608-920553:918284-920553:-	MSTRG.1125.12	MSTRG.1125.6,MSTRG.1125.12
Scaffold_10	novelGeneAS031	novelGeneAS031;A3:Scaffold_10:920984-921201:920768-921201:-	MSTRG.1125.12,MSTRG.1125.2	MSTRG.1125.2,MSTRG.1125.6,MSTRG.1125.12
Scaffold_10	novelGeneAS031	novelGeneAS031;A3:Scaffold_10:918392-920553:918284-920553:-	MSTRG.1125.14,MSTRG.1125.8	MSTRG.1125.6,MSTRG.1125.14,MSTRG.1125.8
Scaffold_10	novelGeneAS031	novelGeneAS031;A3:Scaffold_10:918500-920553:918392-920553:-	MSTRG.1125.15,MSTRG.1125.9	MSTRG.1125.15,MSTRG.1125.9,MSTRG.1125.14,MSTRG.1125.8
Scaffold_10	novelGeneAS031	novelGeneAS031;A3:Scaffold_10:918500-920553:918284-920553:-	MSTRG.1125.15,MSTRG.1125.9	MSTRG.1125.15,MSTRG.1125.9,MSTRG.1125.6
Scaffold_10	novelGeneAS031	novelGeneAS031;A3:Scaffold_10:920444-920553:919904-920553:-	MSTRG.1125.3	MSTRG.1125.10,MSTRG.1125.3,MSTRG.1125.7
Scaffold_10	novelGeneAS031	novelGeneAS031;A3:Scaffold_10:920444-920553:920336-920553:-	MSTRG.1125.3	MSTRG.1125.3,MSTRG.1125.11
Scaffold_10	novelGeneAS031	novelGeneAS031;A3:Scaffold_10:920444-920553:918608-920553:-	MSTRG.1125.3	MSTRG.1125.3,MSTRG.1125.12
Scaffold_10	novelGeneAS031	novelGeneAS031;A3:Scaffold_10:920444-920553:918392-920553:-	MSTRG.1125.3	MSTRG.1125.3,MSTRG.1125.14,MSTRG.1125.8
Scaffold_10	novelGeneAS031	novelGeneAS031;A3:Scaffold_10:920444-920553:918500-920553:-	MSTRG.1125.3	MSTRG.1125.15,MSTRG.1125.3,MSTRG.1125.9
Scaffold_10	novelGeneAS031	novelGeneAS031;A3:Scaffold_10:920444-920553:920012-920553:-	MSTRG.1125.3	MSTRG.1125.3,MSTRG.1125.5
Scaffold_10	novelGeneAS031	novelGeneAS031;A3:Scaffold_10:920444-920553:918284-920553:-	MSTRG.1125.3	MSTRG.1125.3,MSTRG.1125.6
Scaffold_10	novelGeneAS031	novelGeneAS031;A3:Scaffold_10:920012-920553:919904-920553:-	MSTRG.1125.5	MSTRG.1125.10,MSTRG.1125.7,MSTRG.1125.5
Scaffold_10	novelGeneAS031	novelGeneAS031;A3:Scaffold_10:920012-920553:918608-920553:-	MSTRG.1125.5	MSTRG.1125.12,MSTRG.1125.5
Scaffold_10	novelGeneAS031	novelGeneAS031;A3:Scaffold_10:920012-920553:918392-920553:-	MSTRG.1125.5	MSTRG.1125.14,MSTRG.1125.8,MSTRG.1125.5
Scaffold_10	novelGeneAS031	novelGeneAS031;A3:Scaffold_10:920012-920553:918500-920553:-	MSTRG.1125.5	MSTRG.1125.15,MSTRG.1125.9,MSTRG.1125.5
Scaffold_10	novelGeneAS031	novelGeneAS031;A3:Scaffold_10:920012-920553:918284-920553:-	MSTRG.1125.5	MSTRG.1125.6,MSTRG.1125.5
Scaffold_10	novelGeneAS031	novelGeneAS031;A3:Scaffold_10:920444-920985:920336-920985:-	MSTRG.1125.16	MSTRG.1125.16,MSTRG.1125.4
Scaffold_10	Ppup104270	Ppup104270;A3:Scaffold_10:1221057-1221100:1221039-1221100:-	PB.3514.1	PB.3514.2,PB.3514.1
Scaffold_10	Ppup104500	Ppup104500;A3:Scaffold_10:1633516-1633673:1633288-1633673:-	PB.3534.2	PB.3534.2,PB.3534.3
Scaffold_10	Ppup104500	Ppup104500;A3:Scaffold_10:1634824-1635100:1634821-1635100:-	PB.3534.2	PB.3534.2,PB.3534.1,PB.3534.3
Scaffold_10	Ppup104560	Ppup104560;A3:Scaffold_10:1680041-1680538:1680038-1680538:-	PB.3540.2	PB.3540.2,PB.3540.1
Scaffold_10	Ppup104600	Ppup104600;A3:Scaffold_10:1728733-1733238:1728541-1733238:-	PB.3543.3	PB.3543.8,PB.3543.20,PB.3543.3
Scaffold_10	Ppup104620	Ppup104620;A3:Scaffold_10:1738295-1738707:1738273-1738707:-	MSTRG.1187.1	MSTRG.1187.2,MSTRG.1187.1
Scaffold_10	Ppup105890	Ppup105890;A3:Scaffold_10:3544315-3544424:3544275-3544424:-	PB.3636.15,PB.3636.10	PB.3636.10,PB.3636.15,PB.3636.17
Scaffold_10	Ppup105890	Ppup105890;A3:Scaffold_10:3544615-3546955:3544145-3546955:-	PB.3636.11	PB.3636.14,PB.3636.11
Scaffold_10	Ppup105980	Ppup105980;A3:Scaffold_10:3603690-3605156:3603614-3605156:-	PB.3644.5	PB.3644.13,PB.3644.4,PB.3644.1,PB.3644.5
Scaffold_10	Ppup105980	Ppup105980;A3:Scaffold_10:3603690-3605745:3603614-3605745:-	PB.3644.12	PB.3644.12,PB.3644.3,PB.3644.11
Scaffold_10	Ppup106080	Ppup106080;A3:Scaffold_10:3786673-3786772:3786648-3786772:-	PB.3655.2	PB.3655.2,PB.3655.1
Scaffold_10	Ppup106250	Ppup106250;A3:Scaffold_10:3982049-3982783:3982038-3982783:-	PB.3669.1,PB.3669.2	PB.3669.1,PB.3669.3,PB.3669.2
Scaffold_10	Ppup106300	Ppup106300;A3:Scaffold_10:3997907-3998014:3997878-3998014:-	PB.3673.3	PB.3673.2,PB.3673.3,PB.3673.1
Scaffold_10	novelGenePB.3694	novelGenePB.3694;A3:Scaffold_10:4352968-4353039:4352886-4353039:-	PB.3694.57,PB.3694.58,PB.3694.59,PB.3694.60,PB.3694.62,PB.3694.64,PB.3694.65	PB.3694.60,PB.3694.61,PB.3694.57,PB.3694.62,PB.3694.65,PB.3694.64,PB.3694.59,PB.3694.58
Scaffold_10	Ppup106710	Ppup106710;A3:Scaffold_10:4321286-4321357:4321274-4321357:-	PB.3694.55	PB.3694.55,PB.3694.54
Scaffold_101	Ppup074720	Ppup074720;A3:Scaffold_101:73252-75092:71191-75092:-	PB.6656.6	PB.6656.6,PB.6656.7
Scaffold_101	Ppup074760	Ppup074760;A3:Scaffold_101:109616-109686:109599-109686:-	PB.6660.9	PB.6660.2,PB.6660.8,PB.6660.9,PB.6660.7
Scaffold_101	Ppup075260	Ppup075260;A3:Scaffold_101:441229-441310:441223-441310:-	PB.6701.7,PB.6701.15	PB.6701.15,PB.6701.7,PB.6701.17
Scaffold_101	Ppup075260	Ppup075260;A3:Scaffold_101:460519-460594:460516-460594:-	PB.6702.2,PB.6702.3,PB.6702.1,PB.6702.11,PB.6702.4,PB.6702.5,PB.6702.6,PB.6702.10,PB.6702.9,PB.6702.8	PB.6702.3,PB.6702.11,PB.6702.5,PB.6702.7,PB.6702.10,PB.6702.9,PB.6702.6,PB.6702.4,PB.6702.2,PB.6702.8,PB.6702.1
Scaffold_101	Ppup075330_Ppup075340	Ppup075330_Ppup075340;A3:Scaffold_101:531923-540372:531920-540372:-	PB.6707.2,PB.6707.4,PB.6707.6,PB.6707.7,PB.6707.14,PB.6707.22,PB.6707.21,PB.6707.20,PB.6707.30,PB.6707.34,PB.6707.33,PB.6707.39,PB.6707.41,PB.6707.49,PB.6707.46,PB.6707.44	PB.6707.22,PB.6707.30,PB.6707.44,PB.6707.49,PB.6707.41,PB.6707.4,PB.6707.6,PB.6707.39,PB.6707.20,PB.6707.12,PB.6707.36,PB.6707.2,PB.6707.21,PB.6707.46,PB.6707.34,PB.6707.7,PB.6707.14,PB.6707.33
Scaffold_101	Ppup075330	Ppup075330;A3:Scaffold_101:531980-534045:531923-534045:-	PB.6707.5,PB.6707.17,PB.6707.15,PB.6707.31,PB.6707.40,PB.6707.38,PB.6707.43	PB.6707.40,PB.6707.16,PB.6707.32,PB.6707.17,PB.6707.15,PB.6707.31,PB.6707.37,PB.6707.43,PB.6707.38,PB.6707.45,PB.6707.5
Scaffold_101	Ppup075400	Ppup075400;A3:Scaffold_101:583922-583999:583917-583999:-	PB.6714.5	PB.6714.2,PB.6714.5
Scaffold_101	Ppup075420	Ppup075420;A3:Scaffold_101:591630-591700:591627-591700:-	PB.6716.2	PB.6716.2,PB.6716.1
Scaffold_101	Ppup075530_Ppup075540	Ppup075530_Ppup075540;A3:Scaffold_101:689118-691812:689100-691812:-	PB.6725.2	PB.6725.7,PB.6725.2
Scaffold_101	Ppup075680	Ppup075680;A3:Scaffold_101:776375-776456:776372-776456:-	PB.6739.1,PB.6739.3,PB.6739.7,PB.6739.8,PB.6739.9,PB.6739.10,PB.6739.11,PB.6739.12,PB.6739.13	PB.6739.9,PB.6739.10,PB.6739.13,PB.6739.14,PB.6739.7,PB.6739.12,PB.6739.8,PB.6739.11,PB.6739.3,PB.6739.6,PB.6739.1
Scaffold_101	Ppup075680	Ppup075680;A3:Scaffold_101:773870-774235:772902-774235:-	PB.6739.7,PB.6739.10	PB.6739.9,PB.6739.10,PB.6739.13,PB.6739.7,PB.6739.12,PB.6739.8,PB.6739.11,PB.6739.3,PB.6739.6,PB.6739.1
Scaffold_101	Ppup075680	Ppup075680;A3:Scaffold_101:775286-776240:775181-776240:-	PB.6739.9,PB.6739.12	PB.6739.9,PB.6739.10,PB.6739.13,PB.6739.14,PB.6739.7,PB.6739.12,PB.6739.8,PB.6739.11,PB.6739.3,PB.6739.6,PB.6739.1
Scaffold_101	Ppup074750	Ppup074750;A3:Scaffold_101:103811-105348:103811-105357:+	PB.6659.2	PB.6659.4,PB.6659.2
Scaffold_101	Ppup075120	Ppup075120;A3:Scaffold_101:355734-355837:355734-355843:+	PB.6689.1,PB.6689.6,PB.6689.4	PB.6689.2,PB.6689.6,PB.6689.4,PB.6689.1
Scaffold_101	Ppup075120	Ppup075120;A3:Scaffold_101:355734-355837:355734-355879:+	PB.6689.1,PB.6689.6,PB.6689.4	PB.6689.4,PB.6689.3,PB.6689.7,PB.6689.5,PB.6689.6,PB.6689.1
Scaffold_101	Ppup075120	Ppup075120;A3:Scaffold_101:355734-355843:355734-355879:+	PB.6689.2	PB.6689.2,PB.6689.5,PB.6689.3,PB.6689.7
Scaffold_101	Ppup075140	Ppup075140;A3:Scaffold_101:366304-366532:366304-367535:+	PB.6691.7,PB.6691.1,PB.6691.3	PB.6691.4,PB.6691.1,PB.6691.2,PB.6691.3,PB.6691.6,PB.6691.7
Scaffold_101	Ppup075230	Ppup075230;A3:Scaffold_101:419037-419902:419037-419903:+	PB.6699.4	PB.6699.7,PB.6699.4
Scaffold_101	Ppup075380	Ppup075380;A3:Scaffold_101:560060-560136:560060-560145:+	PB.6712.3	PB.6712.3,PB.6712.1
Scaffold_101	Ppup075690	Ppup075690;A3:Scaffold_101:779339-779753:779339-779774:+	PB.6740.10,PB.6740.11,PB.6740.4,PB.6740.6,PB.6740.20	PB.6740.4,PB.6740.10,PB.6740.11,PB.6740.6,PB.6740.20,PB.6740.9
Scaffold_101	Ppup075690	Ppup075690;A3:Scaffold_101:779847-780224:779847-780415:+	PB.6740.10,PB.6740.14,PB.6740.17,PB.6740.6,PB.6740.26	PB.6740.4,PB.6740.26,PB.6740.10,PB.6740.14,PB.6740.17,PB.6740.6
Scaffold_101	Ppup075710	Ppup075710;A3:Scaffold_101:788784-789057:788784-789103:+	PB.6742.2	PB.6742.1,PB.6742.2
Scaffold_101	Ppup075760	Ppup075760;A3:Scaffold_101:806422-806511:806422-806516:+	PB.6744.7	PB.6744.3,PB.6744.7
Scaffold_101	Ppup075760	Ppup075760;A3:Scaffold_101:806422-806491:806422-806516:+	PB.6744.8	PB.6744.8,PB.6744.3
Scaffold_101	Ppup075760	Ppup075760;A3:Scaffold_101:806422-806491:806422-806511:+	PB.6744.8	PB.6744.8,PB.6744.7
Scaffold_101	Ppup075960	Ppup075960;A3:Scaffold_101:924059-924392:924059-924446:+	PB.6756.6	PB.6756.7,PB.6756.4,PB.6756.6,PB.6756.8,PB.6756.3
Scaffold_101	Ppup076180	Ppup076180;A3:Scaffold_101:1112743-1113774:1112743-1113789:+	PB.6777.2	PB.6777.1,PB.6777.2
Scaffold_101	Ppup076260_Ppup076270	Ppup076260_Ppup076270;A3:Scaffold_101:1146247-1146965:1146247-1149125:+	PB.6781.3,PB.6781.5,PB.6781.9,PB.6781.8	PB.6781.10,PB.6781.8,PB.6781.9,PB.6781.3,PB.6781.5
Scaffold_103	Ppup096440	Ppup096440;A3:Scaffold_103:287309-287903:287279-287903:-	PB.6807.1,PB.6807.3,PB.6807.7,PB.6807.8,PB.6807.9	PB.6807.5,PB.6807.9,PB.6807.6,PB.6807.2,PB.6807.3,PB.6807.1,PB.6807.4,PB.6807.8,PB.6807.7
Scaffold_103	Ppup096440	Ppup096440;A3:Scaffold_103:288832-289836:288790-289836:-	PB.6807.1,PB.6807.2,PB.6807.5,PB.6807.9	PB.6807.5,PB.6807.9,PB.6807.6,PB.6807.2,PB.6807.3,PB.6807.1,PB.6807.4,PB.6807.8,PB.6807.7
Scaffold_103	Ppup096440	Ppup096440;A3:Scaffold_103:289930-290224:289927-290224:-	PB.6807.1,PB.6807.2,PB.6807.3,PB.6807.4,PB.6807.5,PB.6807.6,PB.6807.8,PB.6807.9	PB.6807.5,PB.6807.9,PB.6807.6,PB.6807.2,PB.6807.3,PB.6807.1,PB.6807.4,PB.6807.8,PB.6807.7
Scaffold_103	Ppup096810	Ppup096810;A3:Scaffold_103:662819-664477:662807-664477:-	PB.6841.2	PB.6841.1,PB.6841.2
Scaffold_103	Ppup096870	Ppup096870;A3:Scaffold_103:770368-770719:770355-770719:-	MSTRG.1618.3	MSTRG.1618.2,MSTRG.1618.3
Scaffold_103	Ppup097100	Ppup097100;A3:Scaffold_103:1176233-1176298:1176176-1176298:-	PB.6855.1	PB.6855.1,PB.6855.2
Scaffold_103	Ppup096410	Ppup096410;A3:Scaffold_103:220006-222531:220006-222554:+	PB.6803.3,PB.6803.8	PB.6803.3,PB.6803.8,PB.6803.9
Scaffold_103	Ppup096470	Ppup096470;A3:Scaffold_103:345544-345708:345544-345729:+	PB.6810.11,PB.6810.8,PB.6810.6	PB.6810.7,PB.6810.6,PB.6810.4,PB.6810.11,PB.6810.3,PB.6810.8,PB.6810.10,PB.6810.1
Scaffold_103	Ppup096470	Ppup096470;A3:Scaffold_103:343614-343722:343614-343758:+	PB.6810.7,PB.6810.8	PB.6810.7,PB.6810.6,PB.6810.4,PB.6810.11,PB.6810.3,PB.6810.8,PB.6810.10,PB.6810.1
Scaffold_103	Ppup096760	Ppup096760;A3:Scaffold_103:607254-607448:607254-607463:+	PB.6832.2,PB.6832.3,PB.6832.7,PB.6832.5,PB.6832.10	PB.6832.11,PB.6832.3,PB.6832.7,PB.6832.2,PB.6832.5,PB.6832.10
Scaffold_111	Ppup029840	Ppup029840;A3:Scaffold_111:4316-4380:4316-4493:+	PB.6883.1	PB.6883.5,PB.6883.1
Scaffold_111	Ppup030170_Ppup030130_Ppup030160	Ppup030170_Ppup030130_Ppup030160;A3:Scaffold_111:482943-483807:482943-483822:+	PB.6905.3	PB.6905.1,PB.6905.3
Scaffold_111	Ppup029850	Ppup029850;A3:Scaffold_111:6629-6704:6612-6704:-	PB.6884.6,PB.6884.7,PB.6884.4,PB.6884.5,PB.6884.2,PB.6884.3,PB.6884.13,PB.6884.14	PB.6884.6,PB.6884.7,PB.6884.4,PB.6884.14,PB.6884.1,PB.6884.2,PB.6884.5,PB.6884.13,PB.6884.15,PB.6884.3
Scaffold_111	Ppup029850	Ppup029850;A3:Scaffold_111:9318-9393:9292-9393:-	PB.6884.5,PB.6884.14	PB.6884.4,PB.6884.14,PB.6884.1,PB.6884.2,PB.6884.5,PB.6884.15,PB.6884.3
Scaffold_111	Ppup030030	Ppup030030;A3:Scaffold_111:205483-205580:205477-205580:-	PB.6895.1	PB.6895.1,PB.6895.3
Scaffold_111	novelGenePB.6914	novelGenePB.6914;A3:Scaffold_111:809319-809547:808391-809547:-	PB.6914.4	PB.6914.6,PB.6914.4
Scaffold_118	Ppup097750	Ppup097750;A3:Scaffold_118:414232-414898:412966-414898:-	PB.6953.11,PB.6953.26	PB.6953.11,PB.6953.9,PB.6953.6,PB.6953.26,PB.6953.25,PB.6953.13,PB.6953.3
Scaffold_118	Ppup098250	Ppup098250;A3:Scaffold_118:1161852-1162773:1161708-1162773:-	PB.6988.3	PB.6988.3,PB.6988.5
Scaffold_118	Ppup097330	Ppup097330;A3:Scaffold_118:30519-33627:30519-33633:+	PB.6926.1	PB.6926.2,PB.6926.1
Scaffold_118	Ppup097490	Ppup097490;A3:Scaffold_118:151301-151377:151301-151415:+	PB.6936.2	PB.6936.1,PB.6936.2
Scaffold_118	Ppup097680	Ppup097680;A3:Scaffold_118:383553-383794:383553-383848:+	PB.6949.2,PB.6949.9,PB.6949.6,PB.6949.7,PB.6949.3,PB.6949.4	PB.6949.6,PB.6949.2,PB.6949.3,PB.6949.4,PB.6949.7,PB.6949.9,PB.6949.5,PB.6949.8
Scaffold_118	Ppup097950	Ppup097950;A3:Scaffold_118:580389-581751:580389-581778:+	PB.6967.10,PB.6967.2,PB.6967.9	PB.6967.10,PB.6967.2,PB.6967.9,PB.6967.8,PB.6967.3,PB.6967.4
Scaffold_118	Ppup097970	Ppup097970;A3:Scaffold_118:592313-592406:592313-592450:+	MSTRG.1843.1	MSTRG.1843.1,MSTRG.1843.2
Scaffold_118	Ppup098040	Ppup098040;A3:Scaffold_118:913908-914026:913908-914029:+	PB.6971.5,PB.6971.6	PB.6971.6,PB.6971.7,PB.6971.5
Scaffold_118	Ppup098060	Ppup098060;A3:Scaffold_118:929090-929166:929090-929167:+	PB.6975.12	PB.6975.10,PB.6975.5,PB.6975.7,PB.6975.1,PB.6975.12,PB.6975.8,PB.6975.11,PB.6975.2,PB.6975.4,PB.6975.3
Scaffold_119	Ppup069030	Ppup069030;A3:Scaffold_119:203592-203930:202147-203930:-	PB.7007.2	PB.7007.3,PB.7007.2,PB.7007.1,PB.7007.6
Scaffold_119	Ppup069060	Ppup069060;A3:Scaffold_119:231371-231466:231339-231466:-	PB.7009.2	PB.7009.2,PB.7009.4
Scaffold_119	Ppup069240	Ppup069240;A3:Scaffold_119:499801-500081:499780-500081:-	PB.7018.3,PB.7018.8,PB.7018.6,PB.7018.13,PB.7018.16,PB.7018.23,PB.7018.21,PB.7018.19	PB.7018.1,PB.7018.14,PB.7018.6,PB.7018.13,PB.7018.23,PB.7018.3,PB.7018.21,PB.7018.15,PB.7018.20,PB.7018.9,PB.7018.19,PB.7018.22,PB.7018.8,PB.7018.7,PB.7018.16
Scaffold_119	Ppup069050	Ppup069050;A3:Scaffold_119:223547-223639:223547-223648:+	PB.7008.1	PB.7008.1,PB.7008.2
Scaffold_119	Ppup069510	Ppup069510;A3:Scaffold_119:650382-650674:650382-650820:+	PB.7040.3	PB.7040.3,PB.7040.4
Scaffold_119	Ppup069710	Ppup069710;A3:Scaffold_119:957382-958001:957382-958022:+	PB.7053.1	PB.7053.2,PB.7053.1
Scaffold_119	Ppup069710	Ppup069710;A3:Scaffold_119:957382-958001:957382-958013:+	PB.7053.1	PB.7053.3,PB.7053.1
Scaffold_119	Ppup069710	Ppup069710;A3:Scaffold_119:957382-958013:957382-958022:+	PB.7053.3	PB.7053.2,PB.7053.3
Scaffold_122	Ppup076820	Ppup076820;A3:Scaffold_122:44688-44772:44688-44848:+	PB.7062.1	PB.7062.2,PB.7062.1
Scaffold_122	Ppup076890	Ppup076890;A3:Scaffold_122:122709-123119:122709-123161:+	PB.7067.1,PB.7067.3	PB.7067.1,PB.7067.3,PB.7067.2
Scaffold_122	Ppup077020	Ppup077020;A3:Scaffold_122:231376-231616:231376-231640:+	PB.7078.12,PB.7078.11,PB.7078.5,PB.7078.8,PB.7078.9,PB.7078.1,PB.7078.2,PB.7078.3	PB.7078.2,PB.7078.12,PB.7078.6,PB.7078.1,PB.7078.11,PB.7078.5,PB.7078.3,PB.7078.8,PB.7078.9
Scaffold_122	Ppup077020	Ppup077020;A3:Scaffold_122:231376-231616:231376-231627:+	PB.7078.12,PB.7078.11,PB.7078.5,PB.7078.8,PB.7078.9,PB.7078.1,PB.7078.2,PB.7078.3	PB.7078.2,PB.7078.12,PB.7078.7,PB.7078.1,PB.7078.11,PB.7078.5,PB.7078.3,PB.7078.8,PB.7078.9
Scaffold_122	Ppup077020	Ppup077020;A3:Scaffold_122:231794-231897:231794-231901:+	PB.7078.12,PB.7078.11,PB.7078.5,PB.7078.6,PB.7078.8,PB.7078.9,PB.7078.1,PB.7078.2,PB.7078.3	PB.7078.2,PB.7078.12,PB.7078.7,PB.7078.6,PB.7078.1,PB.7078.11,PB.7078.5,PB.7078.3,PB.7078.8,PB.7078.9
Scaffold_122	Ppup077020	Ppup077020;A3:Scaffold_122:231376-231627:231376-231640:+	PB.7078.7	PB.7078.7,PB.7078.6
Scaffold_122	Ppup077020	Ppup077020;A3:Scaffold_122:234208-234443:234208-234951:+	PB.7078.9	PB.7078.11,PB.7078.9
Scaffold_122	Ppup077020	Ppup077020;A3:Scaffold_122:236147-236225:236147-236249:+	PB.7078.2	PB.7078.2,PB.7078.3
Scaffold_122	Ppup077110	Ppup077110;A3:Scaffold_122:337589-338257:337589-338270:+	PB.7083.1,PB.7083.5,PB.7083.4,PB.7083.3,PB.7083.7,PB.7083.8,PB.7083.9,PB.7083.10,PB.7083.12,PB.7083.11,PB.7083.15,PB.7083.14	PB.7083.11,PB.7083.2,PB.7083.5,PB.7083.9,PB.7083.14,PB.7083.12,PB.7083.7,PB.7083.3,PB.7083.15,PB.7083.1,PB.7083.4,PB.7083.8,PB.7083.10
Scaffold_122	Ppup077110	Ppup077110;A3:Scaffold_122:333741-334135:333741-334158:+	PB.7083.7	PB.7083.11,PB.7083.2,PB.7083.5,PB.7083.9,PB.7083.14,PB.7083.6,PB.7083.12,PB.7083.7,PB.7083.3,PB.7083.15,PB.7083.1,PB.7083.4,PB.7083.8,PB.7083.10
Scaffold_122	Ppup077460	Ppup077460;A3:Scaffold_122:720631-720762:720631-720780:+	PB.7108.2	PB.7108.1,PB.7108.2
Scaffold_122	Ppup077530	Ppup077530;A3:Scaffold_122:771128-771425:771128-771445:+	PB.7114.1,PB.7114.4,PB.7114.7,PB.7114.8	PB.7114.4,PB.7114.8,PB.7114.5,PB.7114.7,PB.7114.1
Scaffold_122	Ppup077530	Ppup077530;A3:Scaffold_122:772168-772244:772168-772298:+	PB.7114.1,PB.7114.3,PB.7114.4,PB.7114.5,PB.7114.7,PB.7114.9	PB.7114.4,PB.7114.5,PB.7114.7,PB.7114.9,PB.7114.2,PB.7114.3,PB.7114.1
Scaffold_122	Ppup077530	Ppup077530;A3:Scaffold_122:772168-772244:772168-772295:+	PB.7114.1,PB.7114.3,PB.7114.4,PB.7114.5,PB.7114.7,PB.7114.9	PB.7114.4,PB.7114.8,PB.7114.5,PB.7114.7,PB.7114.9,PB.7114.3,PB.7114.1
Scaffold_122	Ppup077530	Ppup077530;A3:Scaffold_122:771128-771418:771128-771425:+	PB.7114.2	PB.7114.4,PB.7114.8,PB.7114.7,PB.7114.2,PB.7114.1
Scaffold_122	Ppup077530	Ppup077530;A3:Scaffold_122:771128-771418:771128-771445:+	PB.7114.2	PB.7114.5,PB.7114.2
Scaffold_122	Ppup077530	Ppup077530;A3:Scaffold_122:772168-772295:772168-772298:+	PB.7114.8	PB.7114.2,PB.7114.8
Scaffold_122	Ppup077530	Ppup077530;A3:Scaffold_122:771128-771203:771128-771425:+	PB.7114.9	PB.7114.4,PB.7114.8,PB.7114.7,PB.7114.9,PB.7114.1
Scaffold_122	Ppup077530	Ppup077530;A3:Scaffold_122:771128-771203:771128-771418:+	PB.7114.9	PB.7114.9,PB.7114.2
Scaffold_122	Ppup077530	Ppup077530;A3:Scaffold_122:771128-771203:771128-771445:+	PB.7114.9	PB.7114.9,PB.7114.5
Scaffold_122	Ppup077090_Ppup077080	Ppup077090_Ppup077080;A3:Scaffold_122:307693-307778:307690-307778:-	PB.7081.4,PB.7081.5	PB.7081.4,PB.7081.1,PB.7081.5
Scaffold_122	Ppup077190	Ppup077190;A3:Scaffold_122:524179-524885:524155-524885:-	PB.7086.2	PB.7086.2,PB.7086.3
Scaffold_122	Ppup077440	Ppup077440;A3:Scaffold_122:708592-708955:708559-708955:-	PB.7106.2	PB.7106.2,PB.7106.1
Scaffold_122	Ppup077470	Ppup077470;A3:Scaffold_122:723448-723955:723412-723955:-	PB.7109.2	PB.7109.2,PB.7109.1
Scaffold_122	Ppup077510	Ppup077510;A3:Scaffold_122:758451-758905:758427-758905:-	PB.7111.3,PB.7111.6,PB.7111.10,PB.7111.13,PB.7111.22	PB.7111.12,PB.7111.21,PB.7111.10,PB.7111.19,PB.7111.4,PB.7111.3,PB.7111.7,PB.7111.22,PB.7111.13,PB.7111.24,PB.7111.18,PB.7111.8,PB.7111.16,PB.7111.6
Scaffold_122	Ppup077510	Ppup077510;A3:Scaffold_122:756761-757229:756080-757229:-	PB.7111.5,PB.7111.6,PB.7111.7,PB.7111.12,PB.7111.13	PB.7111.12,PB.7111.7,PB.7111.13,PB.7111.14,PB.7111.18,PB.7111.8,PB.7111.5,PB.7111.6
Scaffold_126	Ppup061630	Ppup061630;A3:Scaffold_126:72709-72801:72685-72801:-	PB.7126.1	PB.7126.2,PB.7126.1
Scaffold_13	Ppup063070_Ppup063080	Ppup063070_Ppup063080;A3:Scaffold_13:1816965-1911620:1816944-1911620:-	PB.3738.6,PB.3738.13,PB.3738.9	PB.3738.9,PB.3738.6,PB.3738.5,PB.3738.13,PB.3738.12,PB.3738.4
Scaffold_13	Ppup063370	Ppup063370;A3:Scaffold_13:2366770-2366933:2366766-2366933:-	PB.3763.1,PB.3763.5,PB.3763.14,PB.3763.15,PB.3763.17,PB.3763.18	PB.3763.13,PB.3763.18,PB.3763.15,PB.3763.1,PB.3763.17,PB.3763.5,PB.3763.14
Scaffold_13	Ppup063450	Ppup063450;A3:Scaffold_13:2448527-2449140:2448468-2449140:-	PB.3770.3	PB.3770.2,PB.3770.3
Scaffold_13	Ppup063470	Ppup063470;A3:Scaffold_13:2461190-2461283:2461184-2461283:-	PB.3772.1,PB.3772.2	PB.3772.1,PB.3772.3,PB.3772.2,PB.3772.4
Scaffold_13	Ppup063560	Ppup063560;A3:Scaffold_13:2505762-2505927:2505347-2505927:-	PB.3779.5,PB.3779.10,PB.3779.14	PB.3779.8,PB.3779.5,PB.3779.10,PB.3779.14,PB.3779.6,PB.3779.15
Scaffold_13	Ppup063560_Ppup063570	Ppup063560_Ppup063570;A3:Scaffold_13:2506981-2508942:2506975-2508942:-	PB.3779.1,PB.3779.13	PB.3779.2,PB.3779.1,PB.3779.13
Scaffold_13	Ppup063560_Ppup063570	Ppup063560_Ppup063570;A3:Scaffold_13:2511968-2512049:2511966-2512049:-	PB.3779.1,PB.3779.13	PB.3779.2,PB.3779.1,PB.3779.13
Scaffold_13	Ppup064480	Ppup064480;A3:Scaffold_13:3489197-3489300:3489194-3489300:-	MSTRG.2248.2	MSTRG.2248.1,MSTRG.2248.2
Scaffold_13	Ppup064550	Ppup064550;A3:Scaffold_13:3534020-3534576:3533891-3534576:-	PB.3830.1,PB.3830.13,PB.3830.3,PB.3830.4,PB.3830.6,PB.3830.9,PB.3830.18	PB.3830.6,PB.3830.4,PB.3830.5,PB.3830.1,PB.3830.3,PB.3830.9,PB.3830.18,PB.3830.13
Scaffold_13	Ppup064680	Ppup064680;A3:Scaffold_13:3870672-3870820:3870572-3870820:-	PB.3842.12,PB.3842.7	PB.3842.14,PB.3842.8,PB.3842.13,PB.3842.16,PB.3842.15,PB.3842.12,PB.3842.7,PB.3842.10
Scaffold_13	Ppup062320	Ppup062320;A3:Scaffold_13:300968-301058:300968-301286:+	PB.3709.13,PB.3709.9	PB.3709.9,PB.3709.5,PB.3709.13,PB.3709.10
Scaffold_13	Ppup062460	Ppup062460;A3:Scaffold_13:492599-492611:492599-492612:+	PB.3718.3	PB.3718.2,PB.3718.3
Scaffold_13	Ppup062610	Ppup062610;A3:Scaffold_13:808589-809000:808589-809033:+	PB.3727.1	PB.3727.1,PB.3727.3
Scaffold_13	Ppup062660	Ppup062660;A3:Scaffold_13:878538-879235:878538-879250:+	PB.3731.2,PB.3731.8	PB.3731.6,PB.3731.4,PB.3731.9,PB.3731.8,PB.3731.2
Scaffold_13	Ppup063500	Ppup063500;A3:Scaffold_13:2474992-2475074:2474992-2475077:+	PB.3775.1,PB.3775.4	PB.3775.2,PB.3775.1,PB.3775.4
Scaffold_13	Ppup063840	Ppup063840;A3:Scaffold_13:2685755-2685850:2685755-2685853:+	PB.3792.1	PB.3792.4,PB.3792.1
Scaffold_13	Ppup063920	Ppup063920;A3:Scaffold_13:2751240-2751507:2751240-2751723:+	PB.3801.12,PB.3801.10	PB.3801.10,PB.3801.19,PB.3801.5,PB.3801.12
Scaffold_13	Ppup063920	Ppup063920;A3:Scaffold_13:2751240-2751507:2751240-2753844:+	PB.3801.12	PB.3801.15,PB.3801.9,PB.3801.20,PB.3801.12
Scaffold_13	Ppup063920	Ppup063920;A3:Scaffold_13:2751240-2751502:2751240-2751507:+	PB.3801.18,PB.3801.17,PB.3801.14,PB.3801.1,PB.3801.11,PB.3801.2	PB.3801.17,PB.3801.14,PB.3801.12,PB.3801.11,PB.3801.2,PB.3801.18,PB.3801.1,PB.3801.10
Scaffold_13	Ppup063920	Ppup063920;A3:Scaffold_13:2751240-2751502:2751240-2751723:+	PB.3801.18,PB.3801.17,PB.3801.14,PB.3801.1,PB.3801.11,PB.3801.2	PB.3801.17,PB.3801.14,PB.3801.11,PB.3801.2,PB.3801.18,PB.3801.1,PB.3801.5,PB.3801.19
Scaffold_13	Ppup063920	Ppup063920;A3:Scaffold_13:2751240-2751502:2751240-2753844:+	PB.3801.1	PB.3801.15,PB.3801.1,PB.3801.20,PB.3801.9
Scaffold_13	Ppup064000	Ppup064000;A3:Scaffold_13:2851810-2854029:2851810-2854044:+	PB.3809.8	PB.3809.5,PB.3809.8
Scaffold_13	Ppup064630	Ppup064630;A3:Scaffold_13:3822378-3822451:3822378-3822475:+	PB.3836.2	PB.3836.2,PB.3836.1
Scaffold_13	Ppup064990	Ppup064990;A3:Scaffold_13:4250680-4250757:4250680-4250776:+	MSTRG.2292.2	MSTRG.2292.1,MSTRG.2292.2
Scaffold_141	Ppup098720_Ppup098730	Ppup098720_Ppup098730;A3:Scaffold_141:186523-186626:186520-186626:-	PB.7149.5,PB.7149.7,PB.7149.9	PB.7149.2,PB.7149.7,PB.7149.4,PB.7149.5,PB.7149.9,PB.7149.1
Scaffold_143	Ppup015730	Ppup015730;A3:Scaffold_143:452876-452956:452867-452956:-	PB.7160.10,PB.7160.1	PB.7160.4,PB.7160.1,PB.7160.5,PB.7160.7,PB.7160.6,PB.7160.13,PB.7160.10
Scaffold_143	Ppup015730	Ppup015730;A3:Scaffold_143:454587-454788:454575-454788:-	PB.7160.1,PB.7160.4	PB.7160.4,PB.7160.1,PB.7160.5,PB.7160.13,PB.7160.10
Scaffold_143	Ppup015730	Ppup015730;A3:Scaffold_143:454587-455748:454575-455748:-	PB.7160.6	PB.7160.7,PB.7160.6
Scaffold_143	Ppup015790	Ppup015790;A3:Scaffold_143:485846-485914:485846-485929:+	PB.7166.3	PB.7166.3,PB.7166.2,PB.7166.1
Scaffold_147337	Ppup015880	Ppup015880;A3:Scaffold_147337:42043-42118:42038-42118:-	PB.8594.1	PB.8594.1,PB.8594.2
Scaffold_148	Ppup016230	Ppup016230;A3:Scaffold_148:430849-430946:430849-431023:+	PB.7184.5	PB.7184.5,PB.7184.2
Scaffold_150	Ppup130380	Ppup130380;A3:Scaffold_150:454025-454108:454025-454125:+	PB.7203.1	PB.7203.1,PB.7203.2
Scaffold_150	Ppup130520	Ppup130520;A3:Scaffold_150:834970-835415:834970-837069:+	PB.7208.13	PB.7208.19,PB.7208.8,PB.7208.21,PB.7208.13,PB.7208.12
Scaffold_150	Ppup130100	Ppup130100;A3:Scaffold_150:207981-208065:207953-208065:-	PB.7186.3	PB.7186.6,PB.7186.3,PB.7186.4
Scaffold_153	Ppup030870	Ppup030870;A3:Scaffold_153:13545-13621:13545-13622:+	PB.7219.2	PB.7219.9,PB.7219.6,PB.7219.2,PB.7219.4,PB.7219.8,PB.7219.5,PB.7219.7
Scaffold_153	Ppup030870	Ppup030870;A3:Scaffold_153:13758-13827:13758-13844:+	PB.7219.2,PB.7219.5,PB.7219.6,PB.7219.7,PB.7219.9	PB.7219.9,PB.7219.6,PB.7219.2,PB.7219.8,PB.7219.5,PB.7219.7
Scaffold_153	Ppup031750	Ppup031750;A3:Scaffold_153:846518-847609:846518-847655:+	PB.7270.2,PB.7270.3,PB.7270.6,PB.7270.7	PB.7270.2,PB.7270.7,PB.7270.5,PB.7270.6,PB.7270.3
Scaffold_153	Ppup031020	Ppup031020;A3:Scaffold_153:310456-311076:310453-311076:-	PB.7235.4,PB.7235.33,PB.7235.32	PB.7235.25,PB.7235.32,PB.7235.4,PB.7235.33,PB.7235.12,PB.7235.5,PB.7235.15,PB.7235.13,PB.7235.27
Scaffold_153	Ppup031510	Ppup031510;A3:Scaffold_153:529425-529560:529350-529560:-	PB.7252.2,PB.7252.7	PB.7252.6,PB.7252.2,PB.7252.3,PB.7252.7
Scaffold_158	Ppup107440	Ppup107440;A3:Scaffold_158:563772-563865:563737-563865:-	MSTRG.2583.1	MSTRG.2583.2,MSTRG.2583.1
Scaffold_159	Ppup107820	Ppup107820;A3:Scaffold_159:194922-194991:194904-194991:-	PB.7302.5	PB.7302.7,PB.7302.4,PB.7302.6,PB.7302.2,PB.7302.8,PB.7302.5
Scaffold_159	Ppup107820	Ppup107820;A3:Scaffold_159:226448-235865:226443-235865:-	PB.7302.7,PB.7302.2	PB.7302.2,PB.7302.5,PB.7302.7
Scaffold_159	Ppup107820	Ppup107820;A3:Scaffold_159:195261-195530:195246-195530:-	PB.7302.3	PB.7302.3,PB.7302.4,PB.7302.7,PB.7302.6,PB.7302.2,PB.7302.8,PB.7302.5
Scaffold_16	Ppup119510	Ppup119510;A3:Scaffold_16:658885-659083:658885-659154:+	PB.3878.1,PB.3878.15,PB.3878.2,PB.3878.7,PB.3878.9,PB.3878.10,PB.3878.14,PB.3878.3,PB.3878.5,PB.3878.17,PB.3878.18	PB.3878.10,PB.3878.6,PB.3878.17,PB.3878.2,PB.3878.7,PB.3878.5,PB.3878.14,PB.3878.15,PB.3878.9,PB.3878.18,PB.3878.1,PB.3878.3
Scaffold_16	Ppup119510	Ppup119510;A3:Scaffold_16:643959-644452:643959-644530:+	PB.3878.15	PB.3878.7,PB.3878.15
Scaffold_16	Ppup119510	Ppup119510;A3:Scaffold_16:643959-644452:643959-644463:+	PB.3878.15	PB.3878.10,PB.3878.6,PB.3878.5,PB.3878.14,PB.3878.15,PB.3878.3
Scaffold_16	Ppup119510	Ppup119510;A3:Scaffold_16:643959-644463:643959-644530:+	PB.3878.10,PB.3878.6,PB.3878.14,PB.3878.3,PB.3878.5	PB.3878.10,PB.3878.6,PB.3878.7,PB.3878.5,PB.3878.14,PB.3878.3
Scaffold_16	Ppup119530	Ppup119530;A3:Scaffold_16:681933-682018:681933-682054:+	PB.3880.5	PB.3880.1,PB.3880.5
Scaffold_16	Ppup120050	Ppup120050;A3:Scaffold_16:1814701-1814765:1814701-1814777:+	PB.3912.2	PB.3912.1,PB.3912.2
Scaffold_16	Ppup120330	Ppup120330;A3:Scaffold_16:2163521-2163755:2163521-2163773:+	PB.3934.1,PB.3934.5,PB.3934.6	PB.3934.5,PB.3934.6,PB.3934.1,PB.3934.3
Scaffold_16	Ppup120550	Ppup120550;A3:Scaffold_16:2656590-2656659:2656590-2656662:+	PB.3950.2	PB.3950.2,PB.3950.1
Scaffold_16	Ppup119990	Ppup119990;A3:Scaffold_16:1741793-1745766:1741688-1745766:-	MSTRG.2707.2	MSTRG.2707.2,MSTRG.2707.1
Scaffold_16	Ppup120290	Ppup120290;A3:Scaffold_16:2111568-2111764:2111533-2111764:-	PB.3932.1	PB.3932.1,PB.3932.2
Scaffold_165	Ppup161000	Ppup161000;A3:Scaffold_165:1401510-1401819:1401492-1401819:-	PB.7377.7	PB.7377.7,PB.7377.8,PB.7377.6,PB.7377.3,PB.7377.2
Scaffold_165	Ppup161160	Ppup161160;A3:Scaffold_165:1783487-1783597:1783466-1783597:-	PB.7389.1,PB.7389.2,PB.7389.3	PB.7389.2,PB.7389.4,PB.7389.3,PB.7389.1
Scaffold_165	Ppup161160	Ppup161160;A3:Scaffold_165:1783807-1784241:1783804-1784241:-	PB.7389.2	PB.7389.2,PB.7389.4,PB.7389.3,PB.7389.1
Scaffold_165	Ppup160440	Ppup160440;A3:Scaffold_165:519244-519414:519244-519483:+	PB.7348.1,PB.7348.2	PB.7348.5,PB.7348.2,PB.7348.1,PB.7348.4
Scaffold_166	Ppup161540	Ppup161540;A3:Scaffold_166:856488-856562:856437-856562:-	PB.7407.1	PB.7407.1,PB.7407.2
Scaffold_166	Ppup161560	Ppup161560;A3:Scaffold_166:892569-893183:892510-893183:-	PB.7409.4,PB.7409.9	PB.7409.10,PB.7409.4,PB.7409.14,PB.7409.24,PB.7409.9,PB.7409.26,PB.7409.15,PB.7409.27
Scaffold_166	Ppup161780	Ppup161780;A3:Scaffold_166:1105709-1106665:1105706-1106665:-	PB.7420.6	PB.7420.32,PB.7420.6,PB.7420.21
Scaffold_166	Ppup162080	Ppup162080;A3:Scaffold_166:1317892-1317971:1317889-1317971:-	PB.7436.1,PB.7436.2	PB.7436.1,PB.7436.3,PB.7436.2
Scaffold_166	Ppup162300	Ppup162300;A3:Scaffold_166:1524759-1524848:1524717-1524848:-	PB.7453.3	PB.7453.1,PB.7453.3
Scaffold_166	Ppup162360	Ppup162360;A3:Scaffold_166:1629576-1629673:1629249-1629673:-	PB.7458.4	PB.7458.6,PB.7458.4
Scaffold_166	Ppup162370	Ppup162370;A3:Scaffold_166:1644460-1646473:1644457-1646473:-	PB.7459.5	PB.7459.3,PB.7459.13,PB.7459.5
Scaffold_166	Ppup162560	Ppup162560;A3:Scaffold_166:1775584-1775727:1775548-1775727:-	MSTRG.2964.1	MSTRG.2964.2,MSTRG.2964.1
Scaffold_166	Ppup161910	Ppup161910;A3:Scaffold_166:1242550-1242718:1242550-1242748:+	PB.7427.1	PB.7427.2,PB.7427.1,PB.7427.3
Scaffold_166	Ppup162420	Ppup162420;A3:Scaffold_166:1666575-1667515:1666575-1667518:+	PB.7461.5,PB.7461.2,PB.7461.4	PB.7461.4,PB.7461.5,PB.7461.2,PB.7461.3
Scaffold_166	Ppup162550	Ppup162550;A3:Scaffold_166:1772363-1772434:1772363-1772456:+	PB.7468.2,PB.7468.3	PB.7468.2,PB.7468.1,PB.7468.3
Scaffold_167	Ppup108480	Ppup108480;A3:Scaffold_167:288996-292336:288996-292337:+	PB.7479.10	PB.7479.9,PB.7479.10,PB.7479.8
Scaffold_167	Ppup108380	Ppup108380;A3:Scaffold_167:131831-133718:131819-133718:-	PB.7476.1,PB.7476.3,PB.7476.4,PB.7476.6	PB.7476.4,PB.7476.1,PB.7476.3,PB.7476.2,PB.7476.6,PB.7476.5
Scaffold_17	Ppup081590	Ppup081590;A3:Scaffold_17:72402-72527:72402-72531:+	PB.3960.1,PB.3960.27,PB.3960.31,PB.3960.36,PB.3960.4,PB.3960.52,PB.3960.54,PB.3960.18,PB.3960.19,PB.3960.30,PB.3960.41,PB.3960.5,PB.3960.6,PB.3960.62,PB.3960.22,PB.3960.46,PB.3960.7	PB.3960.31,PB.3960.42,PB.3960.7,PB.3960.4,PB.3960.41,PB.3960.6,PB.3960.46,PB.3960.5,PB.3960.19,PB.3960.1,PB.3960.18,PB.3960.52,PB.3960.62,PB.3960.22,PB.3960.36,PB.3960.27,PB.3960.30,PB.3960.54
Scaffold_17	Ppup081590	Ppup081590;A3:Scaffold_17:73169-73215:73169-73230:+	PB.3960.1,PB.3960.15,PB.3960.21,PB.3960.24,PB.3960.27,PB.3960.35,PB.3960.49,PB.3960.52,PB.3960.59,PB.3960.12,PB.3960.13,PB.3960.18,PB.3960.41,PB.3960.44,PB.3960.56	PB.3960.48,PB.3960.59,PB.3960.12,PB.3960.1,PB.3960.36,PB.3960.38,PB.3960.35,PB.3960.42,PB.3960.49,PB.3960.17,PB.3960.19,PB.3960.44,PB.3960.18,PB.3960.14,PB.3960.26,PB.3960.30,PB.3960.29,PB.3960.11,PB.3960.41,PB.3960.24,PB.3960.52,PB.3960.22,PB.3960.15,PB.3960.2,PB.3960.13,PB.3960.16,PB.3960.56,PB.3960.27,PB.3960.21
Scaffold_17	Ppup081590	Ppup081590;A3:Scaffold_17:73015-73230:73015-73237:+	PB.3960.53,PB.3960.62,PB.3960.46	PB.3960.3,PB.3960.31,PB.3960.23,PB.3960.53,PB.3960.43,PB.3960.32,PB.3960.7,PB.3960.61,PB.3960.28,PB.3960.25,PB.3960.39,PB.3960.4,PB.3960.6,PB.3960.5,PB.3960.50,PB.3960.51,PB.3960.20,PB.3960.46,PB.3960.62,PB.3960.60,PB.3960.40,PB.3960.54
Scaffold_17	Ppup081590	Ppup081590;A3:Scaffold_17:74098-74701:74098-74736:+	PB.3960.22,PB.3960.46,PB.3960.7	PB.3960.22,PB.3960.7,PB.3960.40,PB.3960.46
Scaffold_17	Ppup081600_Ppup081590	Ppup081600_Ppup081590;A3:Scaffold_17:73015-73230:73015-73237:+	PB.3960.10	PB.3960.47,PB.3960.10,PB.3960.8
Scaffold_17	Ppup081600_Ppup081590	Ppup081600_Ppup081590;A3:Scaffold_17:73169-73215:73169-73230:+	PB.3960.37	PB.3960.63,PB.3960.37,PB.3960.9
Scaffold_17	Ppup081600	Ppup081600;A3:Scaffold_17:76209-76522:76209-76537:+	PB.3960.80	PB.3960.81,PB.3960.80,PB.3960.71
Scaffold_17	Ppup081600	Ppup081600;A3:Scaffold_17:76205-76522:76205-76537:+	PB.3960.70,PB.3960.72	PB.3960.72,PB.3960.69,PB.3960.78,PB.3960.65,PB.3960.64,PB.3960.67,PB.3960.74,PB.3960.70
Scaffold_17	Ppup082130	Ppup082130;A3:Scaffold_17:569475-569683:569475-569792:+	PB.3995.1,PB.3995.5	PB.3995.1,PB.3995.2,PB.3995.5
Scaffold_17	Ppup082130	Ppup082130;A3:Scaffold_17:572315-572384:572315-572401:+	PB.3995.1,PB.3995.2,PB.3995.6	PB.3995.6,PB.3995.1,PB.3995.2,PB.3995.5
Scaffold_17	Ppup082320	Ppup082320;A3:Scaffold_17:695881-695957:695881-695958:+	PB.4007.1,PB.4007.2,PB.4007.3,PB.4007.5,PB.4007.7,PB.4007.11,PB.4007.6,PB.4007.13,PB.4007.12	PB.4007.1,PB.4007.3,PB.4007.13,PB.4007.6,PB.4007.7,PB.4007.12,PB.4007.5,PB.4007.2,PB.4007.10,PB.4007.11
Scaffold_17	Ppup082320	Ppup082320;A3:Scaffold_17:697410-698149:697410-698152:+	PB.4007.1,PB.4007.2,PB.4007.7,PB.4007.6,PB.4007.10,PB.4007.13	PB.4007.1,PB.4007.13,PB.4007.6,PB.4007.7,PB.4007.12,PB.4007.2,PB.4007.10,PB.4007.11
Scaffold_17	Ppup082320	Ppup082320;A3:Scaffold_17:707755-708070:707755-708073:+	PB.4007.21,PB.4007.22,PB.4007.24	PB.4007.21,PB.4007.22,PB.4007.23,PB.4007.24
Scaffold_17	Ppup082500	Ppup082500;A3:Scaffold_17:948267-949805:948267-949833:+	PB.4017.4,PB.4017.5,PB.4017.2	PB.4017.3,PB.4017.4,PB.4017.5,PB.4017.2
Scaffold_17	Ppup082950	Ppup082950;A3:Scaffold_17:1394039-1394280:1394039-1394298:+	PB.4053.10,PB.4053.5,PB.4053.6,PB.4053.4,PB.4053.3,PB.4053.19,PB.4053.22,PB.4053.21	PB.4053.4,PB.4053.19,PB.4053.3,PB.4053.22,PB.4053.1,PB.4053.15,PB.4053.18,PB.4053.11,PB.4053.5,PB.4053.6,PB.4053.21,PB.4053.7,PB.4053.10
Scaffold_17	Ppup082950	Ppup082950;A3:Scaffold_17:1394475-1397989:1394475-1397993:+	PB.4053.3	PB.4053.15,PB.4053.3
Scaffold_17	Ppup082970	Ppup082970;A3:Scaffold_17:1401546-1401968:1401546-1401973:+	PB.4055.3,PB.4055.4,PB.4055.2,PB.4055.6,PB.4055.5,PB.4055.7	PB.4055.7,PB.4055.3,PB.4055.8,PB.4055.6,PB.4055.4,PB.4055.5,PB.4055.2
Scaffold_17	Ppup083100	Ppup083100;A3:Scaffold_17:1488938-1489039:1488938-1489068:+	PB.4068.1	PB.4068.1,PB.4068.2
Scaffold_17	Ppup083190	Ppup083190;A3:Scaffold_17:1524557-1524763:1524557-1524879:+	PB.4075.9,PB.4075.8,PB.4075.11,PB.4075.12	PB.4075.8,PB.4075.15,PB.4075.9,PB.4075.11,PB.4075.16,PB.4075.12
Scaffold_17	Ppup083190	Ppup083190;A3:Scaffold_17:1524557-1524728:1524557-1524763:+	PB.4075.10,PB.4075.14	PB.4075.14,PB.4075.8,PB.4075.10,PB.4075.9,PB.4075.11,PB.4075.12
Scaffold_17	Ppup083190	Ppup083190;A3:Scaffold_17:1524557-1524728:1524557-1524879:+	PB.4075.10,PB.4075.14	PB.4075.14,PB.4075.10,PB.4075.16,PB.4075.15
Scaffold_17	Ppup083190	Ppup083190;A3:Scaffold_17:1524512-1524763:1524512-1524879:+	PB.4075.2	PB.4075.2,PB.4075.1,PB.4075.7
Scaffold_17	Ppup083210	Ppup083210;A3:Scaffold_17:1532492-1532588:1532492-1532633:+	PB.4076.10,PB.4076.1,PB.4076.9,PB.4076.6,PB.4076.5	PB.4076.1,PB.4076.6,PB.4076.8,PB.4076.10,PB.4076.5,PB.4076.9
Scaffold_17	Ppup083440	Ppup083440;A3:Scaffold_17:1623541-1623623:1623541-1623632:+	PB.4087.6	PB.4087.6,PB.4087.8,PB.4087.1
Scaffold_17	Ppup083590	Ppup083590;A3:Scaffold_17:1812883-1812973:1812883-1812976:+	PB.4091.1,PB.4091.6,PB.4091.12	PB.4091.1,PB.4091.5,PB.4091.11,PB.4091.16,PB.4091.6,PB.4091.2,PB.4091.10,PB.4091.12
Scaffold_17	Ppup083740	Ppup083740;A3:Scaffold_17:1924595-1924687:1924595-1924725:+	MSTRG.3187.1	MSTRG.3187.2,MSTRG.3187.1
Scaffold_17	Ppup084200_Ppup084190	Ppup084200_Ppup084190;A3:Scaffold_17:2194597-2194693:2194597-2194716:+	PB.4128.5	PB.4128.6,PB.4128.5
Scaffold_17	Ppup084280	Ppup084280;A3:Scaffold_17:2262609-2262679:2262609-2262701:+	PB.4131.18	PB.4131.18,PB.4131.19
Scaffold_17	Ppup084510	Ppup084510;A3:Scaffold_17:2726627-2726707:2726627-2726719:+	PB.4150.14	PB.4150.14,PB.4150.13,PB.4150.2,PB.4150.4
Scaffold_17	Ppup084830	Ppup084830;A3:Scaffold_17:3283575-3284195:3283575-3284207:+	PB.4171.6,PB.4171.15,PB.4171.2,PB.4171.4,PB.4171.17	PB.4171.16,PB.4171.5,PB.4171.15,PB.4171.6,PB.4171.3,PB.4171.17,PB.4171.8,PB.4171.2,PB.4171.4,PB.4171.18
Scaffold_17	Ppup085350_Ppup085360	Ppup085350_Ppup085360;A3:Scaffold_17:3710015-3712491:3710015-3712518:+	PB.4206.1	PB.4206.2,PB.4206.1
Scaffold_17	Ppup085360	Ppup085360;A3:Scaffold_17:3710015-3712491:3710015-3712518:+	PB.4206.4,PB.4206.6,PB.4206.7	PB.4206.4,PB.4206.6,PB.4206.5,PB.4206.7
Scaffold_17	Ppup085970	Ppup085970;A3:Scaffold_17:4246611-4247049:4246611-4247132:+	PB.4249.4	PB.4249.4,PB.4249.5
Scaffold_17	Ppup086200	Ppup086200;A3:Scaffold_17:4412401-4412720:4412401-4412729:+	PB.4268.3	PB.4268.1,PB.4268.3
Scaffold_17	Ppup086320	Ppup086320;A3:Scaffold_17:4499800-4500006:4499800-4500012:+	PB.4276.3,PB.4276.4,PB.4276.5	PB.4276.5,PB.4276.9,PB.4276.3,PB.4276.4,PB.4276.1
Scaffold_17	Ppup086420	Ppup086420;A3:Scaffold_17:4587229-4587571:4587229-4587592:+	PB.4286.1,PB.4286.2,PB.4286.5,PB.4286.6	PB.4286.3,PB.4286.5,PB.4286.2,PB.4286.1,PB.4286.6
Scaffold_17	novelGenePB.3969	novelGenePB.3969;A3:Scaffold_17:212408-212473:212369-212473:-	PB.3969.1,PB.3969.4	PB.3969.1,PB.3969.6,PB.3969.4
Scaffold_17	novelGenePB.3969	novelGenePB.3969;A3:Scaffold_17:213959-214223:213932-214223:-	PB.3969.4,PB.3969.6	PB.3969.6,PB.3969.1,PB.3969.4
Scaffold_17	Ppup082030	Ppup082030;A3:Scaffold_17:526257-526358:526254-526358:-	MSTRG.3044.1	MSTRG.3044.1,MSTRG.3044.2
Scaffold_17	Ppup082660_Ppup082670	Ppup082660_Ppup082670;A3:Scaffold_17:1094470-1094699:1094467-1094699:-	PB.4031.3,PB.4031.6	PB.4031.6,PB.4031.5,PB.4031.3
Scaffold_17	Ppup082660_Ppup082670	Ppup082660_Ppup082670;A3:Scaffold_17:1092256-1092963:1092247-1092963:-	PB.4031.5	PB.4031.6,PB.4031.5
Scaffold_17	novelGeneMSTRG.3109	novelGeneMSTRG.3109;A3:Scaffold_17:1265757-1265850:1265577-1265850:-	MSTRG.3109.1,MSTRG.3109.5	MSTRG.3109.3,MSTRG.3109.1,MSTRG.3109.5,MSTRG.3109.4
Scaffold_17	Ppup082840	Ppup082840;A3:Scaffold_17:1293981-1294378:1293975-1294378:-	PB.4049.1,PB.4049.7,PB.4049.20,PB.4049.16	PB.4049.3,PB.4049.17,PB.4049.2,PB.4049.14,PB.4049.16,PB.4049.20,PB.4049.4,PB.4049.7,PB.4049.13,PB.4049.5,PB.4049.1,PB.4049.6,PB.4049.18,PB.4049.19
Scaffold_17	Ppup082840	Ppup082840;A3:Scaffold_17:1293981-1294378:1293979-1294378:-	PB.4049.1,PB.4049.7,PB.4049.20,PB.4049.16	PB.4049.16,PB.4049.20,PB.4049.7,PB.4049.15,PB.4049.1
Scaffold_17	Ppup082840	Ppup082840;A3:Scaffold_17:1293979-1294378:1293975-1294378:-	PB.4049.15	PB.4049.3,PB.4049.17,PB.4049.2,PB.4049.14,PB.4049.13,PB.4049.4,PB.4049.15,PB.4049.5,PB.4049.6,PB.4049.18,PB.4049.19
Scaffold_17	Ppup082990	Ppup082990;A3:Scaffold_17:1411061-1411152:1411037-1411152:-	PB.4057.1,PB.4057.2	PB.4057.1,PB.4057.2,PB.4057.3
Scaffold_17	Ppup083070	Ppup083070;A3:Scaffold_17:1474144-1476551:1474117-1476551:-	PB.4065.2,PB.4065.8	PB.4065.1,PB.4065.8,PB.4065.10,PB.4065.2
Scaffold_17	Ppup083750	Ppup083750;A3:Scaffold_17:1976091-1976151:1976072-1976151:-	PB.4104.8	PB.4104.1,PB.4104.20,PB.4104.8,PB.4104.26
Scaffold_17	Ppup084350	Ppup084350;A3:Scaffold_17:2594099-2594497:2594072-2594497:-	PB.4137.3,PB.4137.12,PB.4137.11,PB.4137.9	PB.4137.12,PB.4137.3,PB.4137.11,PB.4137.16,PB.4137.10,PB.4137.7,PB.4137.9,PB.4137.8
Scaffold_17	Ppup084350	Ppup084350;A3:Scaffold_17:2594099-2594497:2594091-2594497:-	PB.4137.3,PB.4137.12,PB.4137.11,PB.4137.9	PB.4137.12,PB.4137.3,PB.4137.11,PB.4137.9,PB.4137.17
Scaffold_17	Ppup084350	Ppup084350;A3:Scaffold_17:2594705-2595020:2594687-2595020:-	PB.4137.3,PB.4137.12,PB.4137.10,PB.4137.7	PB.4137.12,PB.4137.3,PB.4137.11,PB.4137.16,PB.4137.10,PB.4137.7,PB.4137.9,PB.4137.8
Scaffold_17	Ppup084350	Ppup084350;A3:Scaffold_17:2594091-2594497:2594072-2594497:-	PB.4137.17	PB.4137.16,PB.4137.10,PB.4137.7,PB.4137.17,PB.4137.8
Scaffold_17	Ppup084530	Ppup084530;A3:Scaffold_17:2739016-2739086:2738981-2739086:-	PB.4152.1,PB.4152.14	PB.4152.16,PB.4152.14,PB.4152.1
Scaffold_17	novelGeneMSTRG.3256	novelGeneMSTRG.3256;A3:Scaffold_17:2808151-2808365:2807942-2808365:-	MSTRG.3256.1	MSTRG.3256.3,MSTRG.3256.1
Scaffold_17	Ppup085760	Ppup085760;A3:Scaffold_17:4093008-4094466:4092996-4094466:-	PB.4228.2,PB.4228.8,PB.4228.11,PB.4228.14	PB.4228.2,PB.4228.4,PB.4228.14,PB.4228.3,PB.4228.1,PB.4228.12,PB.4228.13,PB.4228.11,PB.4228.9,PB.4228.8
Scaffold_17	Ppup085760	Ppup085760;A3:Scaffold_17:4091553-4092053:4091548-4092053:-	PB.4228.9	PB.4228.9,PB.4228.8
Scaffold_17	Ppup085850	Ppup085850;A3:Scaffold_17:4139767-4140077:4139436-4140077:-	PB.4237.3	PB.4237.5,PB.4237.3
Scaffold_173	Ppup163030	Ppup163030;A3:Scaffold_173:271023-271085:270866-271085:-	PB.7509.5	PB.7509.4,PB.7509.5
Scaffold_173	Ppup163200_Ppup163180	Ppup163200_Ppup163180;A3:Scaffold_173:380736-380806:380709-380806:-	PB.7513.2,PB.7513.4,PB.7513.5	PB.7513.1,PB.7513.2,PB.7513.4,PB.7513.3,PB.7513.5
Scaffold_173	Ppup163240	Ppup163240;A3:Scaffold_173:520649-520746:520628-520746:-	PB.7515.3,PB.7515.1	PB.7515.7,PB.7515.4,PB.7515.3,PB.7515.2,PB.7515.1
Scaffold_174	Ppup156530	Ppup156530;A3:Scaffold_174:743672-743758:743672-744227:+	PB.7540.19	PB.7540.22,PB.7540.3,PB.7540.19,PB.7540.7
Scaffold_174	Ppup156530	Ppup156530;A3:Scaffold_174:744967-745035:744967-745037:+	PB.7540.12	PB.7540.12,PB.7540.7
Scaffold_174	Ppup156110	Ppup156110;A3:Scaffold_174:181560-181869:180694-181869:-	PB.7516.6,PB.7516.8,PB.7516.9	PB.7516.9,PB.7516.8,PB.7516.6,PB.7516.2
Scaffold_174	Ppup156210	Ppup156210;A3:Scaffold_174:254348-254704:254336-254704:-	PB.7519.2,PB.7519.3	PB.7519.3,PB.7519.4,PB.7519.2,PB.7519.1
Scaffold_178	Ppup041960	Ppup041960;A3:Scaffold_178:313629-313996:313604-313996:-	PB.7554.11,PB.7554.3,PB.7554.13,PB.7554.14	PB.7554.3,PB.7554.13,PB.7554.11,PB.7554.14,PB.7554.5
Scaffold_178	Ppup041960	Ppup041960;A3:Scaffold_178:317803-318188:317801-318188:-	PB.7554.3,PB.7554.13	PB.7554.5,PB.7554.13,PB.7554.3,PB.7554.14
Scaffold_178	Ppup041950	Ppup041950;A3:Scaffold_178:285946-287883:285946-287905:+	PB.7551.2	PB.7551.1,PB.7551.2
Scaffold_178	Ppup042220	Ppup042220;A3:Scaffold_178:496978-520922:496978-520925:+	PB.7565.3	PB.7565.3,PB.7565.1
Scaffold_179	novelGeneMSTRG.3553	novelGeneMSTRG.3553;A3:Scaffold_179:351886-351969:351886-352011:+	MSTRG.3553.4	MSTRG.3553.2,MSTRG.3553.4
Scaffold_179	novelGeneMSTRG.3553	novelGeneMSTRG.3553;A3:Scaffold_179:351886-351964:351886-351969:+	MSTRG.3553.1	MSTRG.3553.1,MSTRG.3553.4
Scaffold_179	novelGeneMSTRG.3553	novelGeneMSTRG.3553;A3:Scaffold_179:351886-351964:351886-352011:+	MSTRG.3553.1	MSTRG.3553.2,MSTRG.3553.1
Scaffold_18	Ppup131320	Ppup131320;A3:Scaffold_18:1473351-1473528:1473351-1473539:+	PB.4318.3	PB.4318.3,PB.4318.2
Scaffold_18	Ppup132080	Ppup132080;A3:Scaffold_18:3006552-3006690:3006552-3006691:+	PB.4373.3	PB.4373.1,PB.4373.2,PB.4373.7,PB.4373.5,PB.4373.3,PB.4373.4
Scaffold_18	Ppup132080	Ppup132080;A3:Scaffold_18:3005809-3006130:3005809-3006133:+	PB.4373.2,PB.4373.5,PB.4373.7	PB.4373.1,PB.4373.3,PB.4373.7,PB.4373.5,PB.4373.2,PB.4373.4
Scaffold_18	novelGeneAS069	novelGeneAS069;A3:Scaffold_18:3179457-3179536:3179457-3179561:+	PB.4385.3,PB.4385.4	PB.4385.4,PB.4385.2,PB.4385.3
Scaffold_18	Ppup131510	Ppup131510;A3:Scaffold_18:2012406-2012476:2012391-2012476:-	PB.4332.1	PB.4332.2,PB.4332.1
Scaffold_18	Ppup132050	Ppup132050;A3:Scaffold_18:2985149-2985647:2985108-2985647:-	PB.4372.3	PB.4372.1,PB.4372.3,PB.4372.2
Scaffold_18	Ppup132070	Ppup132070;A3:Scaffold_18:2995440-2995520:2995430-2995520:-	MSTRG.3676.2	MSTRG.3676.1,MSTRG.3676.2
Scaffold_180	Ppup163540	Ppup163540;A3:Scaffold_180:317200-317268:317200-317284:+	PB.7579.1,PB.7579.2,PB.7579.32,PB.7579.31,PB.7579.19,PB.7579.18,PB.7579.12,PB.7579.13,PB.7579.14,PB.7579.17,PB.7579.23,PB.7579.25,PB.7579.27,PB.7579.29,PB.7579.6	PB.7579.23,PB.7579.1,PB.7579.14,PB.7579.25,PB.7579.6,PB.7579.12,PB.7579.27,PB.7579.32,PB.7579.28,PB.7579.13,PB.7579.17,PB.7579.19,PB.7579.29,PB.7579.2,PB.7579.16,PB.7579.18,PB.7579.31
Scaffold_180	Ppup163540	Ppup163540;A3:Scaffold_180:317200-317268:317200-317295:+	PB.7579.1,PB.7579.2,PB.7579.32,PB.7579.31,PB.7579.19,PB.7579.18,PB.7579.12,PB.7579.13,PB.7579.14,PB.7579.17,PB.7579.23,PB.7579.25,PB.7579.27,PB.7579.29,PB.7579.6	PB.7579.23,PB.7579.1,PB.7579.14,PB.7579.25,PB.7579.6,PB.7579.12,PB.7579.27,PB.7579.32,PB.7579.13,PB.7579.30,PB.7579.17,PB.7579.19,PB.7579.29,PB.7579.2,PB.7579.18,PB.7579.31
Scaffold_180	Ppup163540	Ppup163540;A3:Scaffold_180:317200-317284:317200-317295:+	PB.7579.16,PB.7579.28	PB.7579.30,PB.7579.28,PB.7579.16
Scaffold_180	Ppup163840	Ppup163840;A3:Scaffold_180:557707-557898:557707-557915:+	PB.7593.7	PB.7593.5,PB.7593.7,PB.7593.3
Scaffold_180	Ppup163890	Ppup163890;A3:Scaffold_180:631667-632001:631667-632074:+	PB.7600.1,PB.7600.2	PB.7600.2,PB.7600.4,PB.7600.1
Scaffold_180	Ppup163530	Ppup163530;A3:Scaffold_180:314573-314958:314472-314958:-	PB.7580.3	PB.7580.3,PB.7580.1
Scaffold_180	Ppup164260	Ppup164260;A3:Scaffold_180:1226507-1228725:1226490-1228725:-	PB.7614.2	PB.7614.5,PB.7614.6,PB.7614.3,PB.7614.2
Scaffold_180	Ppup164320	Ppup164320;A3:Scaffold_180:1264943-1265302:1264922-1265302:-	PB.7617.5,PB.7617.7	PB.7617.6,PB.7617.5,PB.7617.10,PB.7617.3,PB.7617.7,PB.7617.11
Scaffold_182	Ppup157240	Ppup157240;A3:Scaffold_182:524598-524946:524446-524946:-	PB.7641.4	PB.7641.3,PB.7641.4,PB.7641.18,PB.7641.15,PB.7641.5
Scaffold_186	Ppup086620	Ppup086620;A3:Scaffold_186:243363-243693:243363-243761:+	PB.7666.8	PB.7666.5,PB.7666.8
Scaffold_186	Ppup086620	Ppup086620;A3:Scaffold_186:243363-243693:243363-243804:+	PB.7666.8	PB.7666.6,PB.7666.8
Scaffold_186	Ppup086620	Ppup086620;A3:Scaffold_186:243363-243761:243363-243804:+	PB.7666.5	PB.7666.5,PB.7666.6
Scaffold_186	Ppup086660	Ppup086660;A3:Scaffold_186:342896-342975:342896-342977:+	PB.7670.3,PB.7670.5	PB.7670.5,PB.7670.2,PB.7670.3
Scaffold_186	Ppup086660	Ppup086660;A3:Scaffold_186:342896-342974:342896-342977:+	PB.7670.6	PB.7670.2,PB.7670.6
Scaffold_186	Ppup086660	Ppup086660;A3:Scaffold_186:342896-342974:342896-342975:+	PB.7670.6	PB.7670.3,PB.7670.6,PB.7670.5
Scaffold_186	Ppup086670	Ppup086670;A3:Scaffold_186:349007-349076:349007-349860:+	PB.7671.2	PB.7671.9,PB.7671.4,PB.7671.12,PB.7671.6,PB.7671.5,PB.7671.2
Scaffold_186	Ppup086730	Ppup086730;A3:Scaffold_186:513656-513749:513656-513907:+	PB.7677.3,PB.7677.5	PB.7677.4,PB.7677.3,PB.7677.5
Scaffold_186	Ppup086790_Ppup086800	Ppup086790_Ppup086800;A3:Scaffold_186:547729-548023:547729-548147:+	PB.7684.1	PB.7684.2,PB.7684.1
Scaffold_186	Ppup087280	Ppup087280;A3:Scaffold_186:992479-992570:992479-992573:+	MSTRG.3898.3	MSTRG.3898.3,MSTRG.3898.2,MSTRG.3898.1
Scaffold_186	Ppup087330	Ppup087330;A3:Scaffold_186:1007978-1008045:1007978-1008068:+	PB.7726.2,PB.7726.8,PB.7726.1	PB.7726.1,PB.7726.2,PB.7726.5,PB.7726.8
Scaffold_186	Ppup086460	Ppup086460;A3:Scaffold_186:89775-91179:89763-91179:-	PB.7649.10,PB.7649.5,PB.7649.3,PB.7649.7,PB.7649.28	PB.7649.3,PB.7649.5,PB.7649.4,PB.7649.7,PB.7649.10,PB.7649.28
Scaffold_186	Ppup086460	Ppup086460;A3:Scaffold_186:94038-95125:94002-95125:-	PB.7649.7	PB.7649.3,PB.7649.4,PB.7649.7,PB.7649.28
Scaffold_186	Ppup086460	Ppup086460;A3:Scaffold_186:93438-93517:93435-93517:-	PB.7649.28	PB.7649.3,PB.7649.5,PB.7649.4,PB.7649.7,PB.7649.10,PB.7649.28
Scaffold_186	Ppup086580	Ppup086580;A3:Scaffold_186:217175-217570:217159-217570:-	PB.7660.4,PB.7660.2,PB.7660.6,PB.7660.8,PB.7660.7	PB.7660.5,PB.7660.4,PB.7660.6,PB.7660.7,PB.7660.8,PB.7660.2
Scaffold_186	Ppup086580	Ppup086580;A3:Scaffold_186:216171-216265:216133-216265:-	PB.7660.6	PB.7660.5,PB.7660.4,PB.7660.6,PB.7660.8,PB.7660.7,PB.7660.2
Scaffold_186	Ppup086590	Ppup086590;A3:Scaffold_186:226138-226443:226125-226443:-	PB.7661.2	PB.7661.2,PB.7661.1,PB.7661.3
Scaffold_186	Ppup087450	Ppup087450;A3:Scaffold_186:1073427-1073729:1073409-1073729:-	PB.7736.2	PB.7736.4,PB.7736.2
Scaffold_188	Ppup042350	Ppup042350;A3:Scaffold_188:38051-38141:38051-38144:+	PB.7742.1,PB.7742.2,PB.7742.3	PB.7742.2,PB.7742.4,PB.7742.3,PB.7742.1
Scaffold_188	Ppup042350	Ppup042350;A3:Scaffold_188:37631-37716:37631-37719:+	PB.7742.2,PB.7742.4	PB.7742.2,PB.7742.4,PB.7742.3,PB.7742.1
Scaffold_188	Ppup042380	Ppup042380;A3:Scaffold_188:164513-165118:164513-166414:+	PB.7747.3,PB.7747.4,PB.7747.12	PB.7747.9,PB.7747.7,PB.7747.3,PB.7747.6,PB.7747.12,PB.7747.4,PB.7747.5
Scaffold_188	Ppup042410	Ppup042410;A3:Scaffold_188:176427-177117:176427-177122:+	PB.7749.3	PB.7749.3,PB.7749.1
Scaffold_188	Ppup042410	Ppup042410;A3:Scaffold_188:176427-177077:176427-177122:+	PB.7749.4	PB.7749.4,PB.7749.1
Scaffold_188	Ppup042410	Ppup042410;A3:Scaffold_188:176427-177077:176427-177117:+	PB.7749.4	PB.7749.3,PB.7749.4
Scaffold_188	Ppup042450	Ppup042450;A3:Scaffold_188:204734-204858:204734-204864:+	PB.7751.2	PB.7751.3,PB.7751.2
Scaffold_188	Ppup042450	Ppup042450;A3:Scaffold_188:204734-204858:204734-204861:+	PB.7751.2	PB.7751.1,PB.7751.2
Scaffold_188	Ppup042450	Ppup042450;A3:Scaffold_188:204734-204861:204734-204864:+	PB.7751.1	PB.7751.1,PB.7751.3
Scaffold_188	Ppup042670	Ppup042670;A3:Scaffold_188:324479-324567:324479-324633:+	PB.7767.2	PB.7767.1,PB.7767.2
Scaffold_188	novelGenePB.7774	novelGenePB.7774;A3:Scaffold_188:587871-587929:587871-588026:+	PB.7774.6,PB.7774.10,PB.7774.5,PB.7774.15,PB.7774.16	PB.7774.3,PB.7774.10,PB.7774.4,PB.7774.13,PB.7774.8,PB.7774.17,PB.7774.15,PB.7774.7,PB.7774.16,PB.7774.2,PB.7774.6,PB.7774.5,PB.7774.14
Scaffold_19	Ppup133030	Ppup133030;A3:Scaffold_19:735959-736029:735959-736062:+	PB.4424.5,PB.4424.7,PB.4424.1,PB.4424.2,PB.4424.12,PB.4424.10	PB.4424.10,PB.4424.12,PB.4424.1,PB.4424.8,PB.4424.2,PB.4424.7,PB.4424.5
Scaffold_19	Ppup133520	Ppup133520;A3:Scaffold_19:1665197-1665255:1665197-1665268:+	PB.4461.4,PB.4461.5,PB.4461.8	PB.4461.8,PB.4461.1,PB.4461.4,PB.4461.6,PB.4461.5,PB.4461.7,PB.4461.2,PB.4461.3
Scaffold_19	Ppup133960	Ppup133960;A3:Scaffold_19:2072899-2073410:2072899-2074808:+	PB.4495.22,PB.4495.25	PB.4495.25,PB.4495.8,PB.4495.22
Scaffold_19	Ppup134510	Ppup134510;A3:Scaffold_19:2791701-2791797:2791701-2791853:+	PB.4534.1,PB.4534.3	PB.4534.2,PB.4534.4,PB.4534.1,PB.4534.3
Scaffold_19	Ppup134900	Ppup134900;A3:Scaffold_19:3242152-3242979:3242152-3242997:+	PB.4566.4,PB.4566.8,PB.4566.10	PB.4566.10,PB.4566.8,PB.4566.12,PB.4566.4,PB.4566.1,PB.4566.7,PB.4566.5,PB.4566.11
Scaffold_19	Ppup134970	Ppup134970;A3:Scaffold_19:3427532-3429214:3427532-3429225:+	PB.4571.33,PB.4571.28	PB.4571.24,PB.4571.20,PB.4571.26,PB.4571.28,PB.4571.25,PB.4571.21,PB.4571.33,PB.4571.34
Scaffold_19	Ppup135280	Ppup135280;A3:Scaffold_19:4300431-4300513:4300431-4300516:+	PB.4586.5,PB.4586.4,PB.4586.2,PB.4586.3	PB.4586.10,PB.4586.4,PB.4586.2,PB.4586.5,PB.4586.7,PB.4586.3
Scaffold_19	Ppup135280	Ppup135280;A3:Scaffold_19:4297898-4298232:4297898-4298704:+	PB.4586.2	PB.4586.2,PB.4586.10
Scaffold_19	Ppup132510	Ppup132510;A3:Scaffold_19:27564-27638:27540-27638:-	PB.4393.2	PB.4393.2,PB.4393.3
Scaffold_19	Ppup132630	Ppup132630;A3:Scaffold_19:125094-125168:125091-125168:-	PB.4404.1	PB.4404.1,PB.4404.4
Scaffold_19	Ppup132630	Ppup132630;A3:Scaffold_19:126517-126861:126445-126861:-	PB.4404.1	PB.4404.1,PB.4404.4
Scaffold_19	Ppup132970_Ppup132960	Ppup132970_Ppup132960;A3:Scaffold_19:638124-638455:638099-638455:-	PB.4420.5,PB.4420.8,PB.4420.9	PB.4420.9,PB.4420.5,PB.4420.8,PB.4420.14
Scaffold_19	Ppup132970_Ppup132960	Ppup132970_Ppup132960;A3:Scaffold_19:638550-641280:638498-641280:-	PB.4420.5,PB.4420.9,PB.4420.14	PB.4420.9,PB.4420.5,PB.4420.8,PB.4420.14
Scaffold_19	Ppup133150	Ppup133150;A3:Scaffold_19:1163115-1164740:1163085-1164740:-	PB.4430.2,PB.4430.7,PB.4430.9	PB.4430.9,PB.4430.7,PB.4430.5,PB.4430.2
Scaffold_19	Ppup133150	Ppup133150;A3:Scaffold_19:1169529-1169637:1169526-1169637:-	PB.4430.2,PB.4430.5,PB.4430.9,PB.4430.15,PB.4430.11,PB.4430.14,PB.4430.16	PB.4430.15,PB.4430.14,PB.4430.2,PB.4430.16,PB.4430.5,PB.4430.9,PB.4430.11,PB.4430.10
Scaffold_19	Ppup133150	Ppup133150;A3:Scaffold_19:1172117-1172306:1172114-1172306:-	PB.4430.5,PB.4430.9,PB.4430.15,PB.4430.10,PB.4430.14,PB.4430.16	PB.4430.14,PB.4430.15,PB.4430.5,PB.4430.9,PB.4430.16,PB.4430.11,PB.4430.10
Scaffold_19	Ppup133150	Ppup133150;A3:Scaffold_19:1168769-1169145:1168748-1169145:-	PB.4430.15,PB.4430.14	PB.4430.14,PB.4430.15,PB.4430.2,PB.4430.16,PB.4430.5,PB.4430.9,PB.4430.11,PB.4430.10
Scaffold_19	Ppup133470	Ppup133470;A3:Scaffold_19:1596521-1596606:1596520-1596606:-	PB.4458.1	PB.4458.11,PB.4458.1,PB.4458.12
Scaffold_19	Ppup133470	Ppup133470;A3:Scaffold_19:1596523-1596606:1596521-1596606:-	PB.4458.2,PB.4458.13,PB.4458.5,PB.4458.6,PB.4458.9	PB.4458.13,PB.4458.5,PB.4458.9,PB.4458.6,PB.4458.2,PB.4458.1
Scaffold_19	Ppup133470	Ppup133470;A3:Scaffold_19:1596523-1596606:1596520-1596606:-	PB.4458.2,PB.4458.13,PB.4458.5,PB.4458.6,PB.4458.9	PB.4458.13,PB.4458.5,PB.4458.9,PB.4458.11,PB.4458.12,PB.4458.6,PB.4458.2
Scaffold_19	Ppup133470	Ppup133470;A3:Scaffold_19:1597542-1597879:1597527-1597879:-	PB.4458.2,PB.4458.5,PB.4458.9	PB.4458.13,PB.4458.5,PB.4458.9,PB.4458.11,PB.4458.12,PB.4458.6,PB.4458.2,PB.4458.1
Scaffold_19	Ppup133470	Ppup133470;A3:Scaffold_19:1598446-1598668:1598428-1598668:-	PB.4458.2,PB.4458.11,PB.4458.12,PB.4458.9	PB.4458.13,PB.4458.5,PB.4458.9,PB.4458.11,PB.4458.12,PB.4458.6,PB.4458.2,PB.4458.1
Scaffold_19	Ppup133470	Ppup133470;A3:Scaffold_19:1595916-1596008:1595895-1596008:-	PB.4458.11,PB.4458.13	PB.4458.13,PB.4458.5,PB.4458.9,PB.4458.12,PB.4458.11,PB.4458.6,PB.4458.2,PB.4458.1
Scaffold_19	Ppup133760	Ppup133760;A3:Scaffold_19:1800907-1801094:1800892-1801094:-	PB.4480.1	PB.4480.3,PB.4480.1,PB.4480.2
Scaffold_19	Ppup133780	Ppup133780;A3:Scaffold_19:1863357-1864761:1863338-1864761:-	PB.4482.12	PB.4482.12,PB.4482.17,PB.4482.4
Scaffold_19	Ppup133830	Ppup133830;A3:Scaffold_19:1890974-1892243:1890904-1892243:-	PB.4486.11	PB.4486.13,PB.4486.11
Scaffold_19	Ppup133890	Ppup133890;A3:Scaffold_19:1929474-1938807:1929471-1938807:-	PB.4489.1,PB.4489.14,PB.4489.9	PB.4489.9,PB.4489.14,PB.4489.7,PB.4489.1
Scaffold_19	Ppup133890	Ppup133890;A3:Scaffold_19:1923756-1924564:1923753-1924564:-	PB.4489.2,PB.4489.5,PB.4489.21,PB.4489.20,PB.4489.9	PB.4489.9,PB.4489.20,PB.4489.5,PB.4489.1,PB.4489.7,PB.4489.2,PB.4489.11,PB.4489.21,PB.4489.18,PB.4489.14,PB.4489.3,PB.4489.6,PB.4489.8,PB.4489.10
Scaffold_19	Ppup133890	Ppup133890;A3:Scaffold_19:1931149-1932093:1931146-1932093:-	PB.4489.8	PB.4489.8,PB.4489.24
Scaffold_19	Ppup134010	Ppup134010;A3:Scaffold_19:2151510-2154756:2151329-2154756:-	PB.4499.2,PB.4499.9,PB.4499.31,PB.4499.17	PB.4499.13,PB.4499.9,PB.4499.17,PB.4499.31,PB.4499.2
Scaffold_19	Ppup134010	Ppup134010;A3:Scaffold_19:2151558-2151674:2151510-2151674:-	PB.4499.20	PB.4499.16,PB.4499.20,PB.4499.19
Scaffold_19	Ppup134040	Ppup134040;A3:Scaffold_19:2168945-2169036:2168927-2169036:-	PB.4501.2	PB.4501.1,PB.4501.3,PB.4501.4,PB.4501.5,PB.4501.2
Scaffold_19	Ppup134040	Ppup134040;A3:Scaffold_19:2172317-2173382:2172314-2173382:-	PB.4501.2,PB.4501.3	PB.4501.2,PB.4501.3,PB.4501.1
Scaffold_19	novelGeneMSTRG.4186	novelGeneMSTRG.4186;A3:Scaffold_19:3525734-3525820:3525716-3525820:-	MSTRG.4186.2	MSTRG.4186.2,MSTRG.4186.1
Scaffold_19	Ppup135110	Ppup135110;A3:Scaffold_19:3822344-3823258:3822329-3823258:-	PB.4578.31	PB.4578.35,PB.4578.24,PB.4578.26,PB.4578.36,PB.4578.9,PB.4578.8,PB.4578.10,PB.4578.1,PB.4578.45,PB.4578.3,PB.4578.2,PB.4578.21,PB.4578.30,PB.4578.29,PB.4578.39,PB.4578.37,PB.4578.38,PB.4578.23,PB.4578.16,PB.4578.6,PB.4578.27,PB.4578.28,PB.4578.31
Scaffold_19	Ppup135300	Ppup135300;A3:Scaffold_19:4316018-4316272:4316000-4316272:-	PB.4589.1,PB.4589.2,PB.4589.12,PB.4589.8	PB.4589.11,PB.4589.4,PB.4589.2,PB.4589.7,PB.4589.1,PB.4589.12,PB.4589.8,PB.4589.13
Scaffold_19	Ppup135300	Ppup135300;A3:Scaffold_19:4316417-4316974:4316399-4316974:-	PB.4589.1,PB.4589.11,PB.4589.7,PB.4589.12,PB.4589.8	PB.4589.11,PB.4589.7,PB.4589.1,PB.4589.12,PB.4589.8,PB.4589.13
Scaffold_191	Ppup001310_Ppup001350_Ppup001360	Ppup001310_Ppup001350_Ppup001360;A3:Scaffold_191:476264-476336:476264-476339:+	PB.7781.3,PB.7781.8	PB.7781.5,PB.7781.8,PB.7781.3,PB.7781.4
Scaffold_198	Ppup157400	Ppup157400;A3:Scaffold_198:325865-371591:325865-371594:+	MSTRG.4245.5	MSTRG.4245.5,MSTRG.4245.2
Scaffold_198	Ppup157400	Ppup157400;A3:Scaffold_198:325865-370832:325865-371591:+	MSTRG.4245.7	MSTRG.4245.7,MSTRG.4245.5
Scaffold_198	Ppup157400	Ppup157400;A3:Scaffold_198:325865-370832:325865-371594:+	MSTRG.4245.7	MSTRG.4245.7,MSTRG.4245.2
Scaffold_2	Ppup109790	Ppup109790;A3:Scaffold_2:377044-377113:376972-377113:-	MSTRG.4267.11	MSTRG.4267.10,MSTRG.4267.11
Scaffold_2	Ppup110390	Ppup110390;A3:Scaffold_2:1007928-1008219:1007917-1008219:-	PB.927.2	PB.927.2,PB.927.1
Scaffold_2	Ppup110820	Ppup110820;A3:Scaffold_2:1806867-1811600:1806098-1811600:-	PB.955.149	PB.955.26,PB.955.18,PB.955.111,PB.955.149,PB.955.8
Scaffold_2	Ppup111640	Ppup111640;A3:Scaffold_2:2763714-2767027:2763699-2767027:-	PB.1020.1	PB.1020.1,PB.1020.2
Scaffold_2	Ppup111860	Ppup111860;A3:Scaffold_2:3059743-3066103:3059701-3066103:-	PB.1032.2,PB.1032.11,PB.1032.13,PB.1032.9	PB.1032.10,PB.1032.11,PB.1032.4,PB.1032.15,PB.1032.17,PB.1032.18,PB.1032.3,PB.1032.16,PB.1032.9,PB.1032.2,PB.1032.13,PB.1032.12,PB.1032.14
Scaffold_2	Ppup111860	Ppup111860;A3:Scaffold_2:3066506-3066578:3066485-3066578:-	PB.1032.2,PB.1032.3,PB.1032.4,PB.1032.11,PB.1032.12,PB.1032.13,PB.1032.17,PB.1032.18,PB.1032.10,PB.1032.9,PB.1032.29	PB.1032.10,PB.1032.11,PB.1032.4,PB.1032.15,PB.1032.29,PB.1032.17,PB.1032.18,PB.1032.3,PB.1032.16,PB.1032.9,PB.1032.27,PB.1032.2,PB.1032.28,PB.1032.13,PB.1032.12,PB.1032.14,PB.1032.30
Scaffold_2	Ppup111860	Ppup111860;A3:Scaffold_2:3072076-3072595:3072068-3072595:-	PB.1032.2,PB.1032.3,PB.1032.4,PB.1032.11,PB.1032.12,PB.1032.13,PB.1032.14,PB.1032.15,PB.1032.16,PB.1032.17,PB.1032.18,PB.1032.10,PB.1032.9,PB.1032.29,PB.1032.27,PB.1032.30	PB.1032.10,PB.1032.11,PB.1032.4,PB.1032.15,PB.1032.29,PB.1032.17,PB.1032.18,PB.1032.3,PB.1032.16,PB.1032.9,PB.1032.27,PB.1032.2,PB.1032.28,PB.1032.13,PB.1032.12,PB.1032.14,PB.1032.30
Scaffold_2	Ppup111860	Ppup111860;A3:Scaffold_2:3072761-3073145:3072749-3073145:-	PB.1032.4,PB.1032.13,PB.1032.17	PB.1032.10,PB.1032.11,PB.1032.4,PB.1032.15,PB.1032.29,PB.1032.17,PB.1032.18,PB.1032.3,PB.1032.16,PB.1032.9,PB.1032.27,PB.1032.2,PB.1032.28,PB.1032.13,PB.1032.12,PB.1032.14,PB.1032.30
Scaffold_2	Ppup112310	Ppup112310;A3:Scaffold_2:3558078-3558184:3558075-3558184:-	PB.1070.5,PB.1070.3,PB.1070.10	PB.1070.10,PB.1070.1,PB.1070.5,PB.1070.3,PB.1070.7
Scaffold_2	Ppup112450	Ppup112450;A3:Scaffold_2:3737509-3737819:3737472-3737819:-	PB.1081.2,PB.1081.4,PB.1081.9	PB.1081.4,PB.1081.2,PB.1081.9,PB.1081.5,PB.1081.12
Scaffold_2	Ppup112450	Ppup112450;A3:Scaffold_2:3737509-3737819:3737428-3737819:-	PB.1081.2,PB.1081.4,PB.1081.9	PB.1081.4,PB.1081.2,PB.1081.9,PB.1081.8
Scaffold_2	Ppup112450	Ppup112450;A3:Scaffold_2:3737472-3737819:3737428-3737819:-	PB.1081.5,PB.1081.12	PB.1081.12,PB.1081.5,PB.1081.8
Scaffold_2	Ppup112700	Ppup112700;A3:Scaffold_2:4526566-4526678:4526548-4526678:-	PB.1101.20	PB.1101.17,PB.1101.24,PB.1101.4,PB.1101.1,PB.1101.6,PB.1101.20,PB.1101.22,PB.1101.11,PB.1101.3,PB.1101.9,PB.1101.21,PB.1101.5
Scaffold_2	Ppup113080	Ppup113080;A3:Scaffold_2:5023204-5023783:5023181-5023783:-	PB.1119.1	PB.1119.1,PB.1119.2
Scaffold_2	Ppup113500	Ppup113500;A3:Scaffold_2:5683051-5683119:5683049-5683119:-	PB.1150.2	PB.1150.2,PB.1150.1,PB.1150.3
Scaffold_2	Ppup114450	Ppup114450;A3:Scaffold_2:6827744-6828106:6827743-6828106:-	PB.1203.2	PB.1203.1,PB.1203.2
Scaffold_2	Ppup114530	Ppup114530;A3:Scaffold_2:6923302-6923517:6922751-6923517:-	PB.1207.2	PB.1207.10,PB.1207.2,PB.1207.4
Scaffold_2	Ppup114530	Ppup114530;A3:Scaffold_2:6923302-6923517:6923147-6923517:-	PB.1207.2	PB.1207.6,PB.1207.2
Scaffold_2	Ppup114530	Ppup114530;A3:Scaffold_2:6923147-6923517:6922751-6923517:-	PB.1207.6	PB.1207.6,PB.1207.4,PB.1207.10
Scaffold_2	Ppup114560	Ppup114560;A3:Scaffold_2:6937633-6937694:6937576-6937694:-	PB.1208.3	PB.1208.7,PB.1208.3
Scaffold_2	Ppup114690	Ppup114690;A3:Scaffold_2:7411451-7411674:7411430-7411674:-	PB.1217.2,PB.1217.4	PB.1217.1,PB.1217.3,PB.1217.6,PB.1217.4,PB.1217.2
Scaffold_2	Ppup114850	Ppup114850;A3:Scaffold_2:8082501-8083368:8082500-8083368:-	PB.1225.2	PB.1225.2,PB.1225.4,PB.1225.3
Scaffold_2	Ppup115210	Ppup115210;A3:Scaffold_2:8438188-8438268:8438177-8438268:-	PB.1253.6,PB.1253.4,PB.1253.5,PB.1253.8,PB.1253.10,PB.1253.12,PB.1253.11,PB.1253.20	PB.1253.4,PB.1253.12,PB.1253.11,PB.1253.20,PB.1253.5,PB.1253.16,PB.1253.6,PB.1253.8,PB.1253.10
Scaffold_2	Ppup115290	Ppup115290;A3:Scaffold_2:8471892-8472549:8471874-8472549:-	PB.1261.1,PB.1261.4,PB.1261.2,PB.1261.5,PB.1261.10,PB.1261.11	PB.1261.5,PB.1261.2,PB.1261.11,PB.1261.4,PB.1261.7,PB.1261.10,PB.1261.1
Scaffold_2	Ppup115630	Ppup115630;A3:Scaffold_2:9445951-9475702:9445948-9475702:-	MSTRG.4757.1,MSTRG.4757.2,MSTRG.4757.6	MSTRG.4757.6,MSTRG.4757.1,MSTRG.4757.5,MSTRG.4757.2
Scaffold_2	Ppup109840	Ppup109840;A3:Scaffold_2:408666-408769:408666-408792:+	MSTRG.4271.1	MSTRG.4271.1,MSTRG.4271.2
Scaffold_2	Ppup110130	Ppup110130;A3:Scaffold_2:589239-589311:589239-589316:+	PB.905.1,PB.905.3	PB.905.3,PB.905.2,PB.905.1
Scaffold_2	Ppup110130	Ppup110130;A3:Scaffold_2:589713-589845:589713-589894:+	PB.905.2	PB.905.3,PB.905.2,PB.905.1
Scaffold_2	Ppup110190	Ppup110190;A3:Scaffold_2:613444-613645:613444-613798:+	PB.911.2	PB.911.4,PB.911.2
Scaffold_2	Ppup110270	Ppup110270;A3:Scaffold_2:661441-661768:661441-662539:+	PB.917.8	PB.917.8,PB.917.5,PB.917.2
Scaffold_2	novelGeneAS084	novelGeneAS084;A3:Scaffold_2:785425-785603:785425-785726:+	PB.925.1,PB.925.4	PB.925.4,PB.925.2,PB.925.1
Scaffold_2	Ppup110950	Ppup110950;A3:Scaffold_2:1939224-1939720:1939224-1939741:+	PB.967.4,PB.967.3	PB.967.3,PB.967.1,PB.967.2,PB.967.10,PB.967.4
Scaffold_2	Ppup111050	Ppup111050;A3:Scaffold_2:2019653-2020746:2019653-2020766:+	MSTRG.4371.4	MSTRG.4371.1,MSTRG.4371.4
Scaffold_2	Ppup111350	Ppup111350;A3:Scaffold_2:2442214-2442292:2442214-2442295:+	PB.994.1,PB.994.4	PB.994.4,PB.994.2,PB.994.1
Scaffold_2	Ppup111570	Ppup111570;A3:Scaffold_2:2728509-2729086:2728509-2729102:+	MSTRG.4415.2	MSTRG.4415.1,MSTRG.4415.2
Scaffold_2	Ppup111810	Ppup111810;A3:Scaffold_2:3035390-3035483:3035390-3035537:+	PB.1030.2	PB.1030.3,PB.1030.2
Scaffold_2	Ppup111810	Ppup111810;A3:Scaffold_2:3035390-3035462:3035390-3035483:+	PB.1030.4	PB.1030.4,PB.1030.2
Scaffold_2	Ppup111810	Ppup111810;A3:Scaffold_2:3035390-3035462:3035390-3035537:+	PB.1030.4	PB.1030.4,PB.1030.3
Scaffold_2	Ppup111930	Ppup111930;A3:Scaffold_2:3166887-3166959:3166887-3166986:+	PB.1039.11,PB.1039.1,PB.1039.9	PB.1039.9,PB.1039.11,PB.1039.4,PB.1039.1
Scaffold_2	Ppup111930	Ppup111930;A3:Scaffold_2:3166542-3166620:3166542-3166665:+	PB.1039.4,PB.1039.1,PB.1039.9	PB.1039.9,PB.1039.1,PB.1039.11,PB.1039.4
Scaffold_2	Ppup111950	Ppup111950;A3:Scaffold_2:3202671-3202753:3202671-3202766:+	PB.1041.1	PB.1041.2,PB.1041.1
Scaffold_2	Ppup112250	Ppup112250;A3:Scaffold_2:3523435-3523611:3523435-3523623:+	PB.1064.4,PB.1064.8,PB.1064.14,PB.1064.12	PB.1064.7,PB.1064.3,PB.1064.1,PB.1064.15,PB.1064.8,PB.1064.17,PB.1064.14,PB.1064.4,PB.1064.11,PB.1064.12
Scaffold_2	Ppup112780	Ppup112780;A3:Scaffold_2:4810837-4811291:4810837-4811372:+	MSTRG.4518.3	MSTRG.4518.3,MSTRG.4518.2
Scaffold_2	Ppup112780	Ppup112780;A3:Scaffold_2:4810837-4811279:4810837-4811291:+	MSTRG.4518.1	MSTRG.4518.3,MSTRG.4518.1
Scaffold_2	Ppup112780	Ppup112780;A3:Scaffold_2:4810837-4811279:4810837-4811372:+	MSTRG.4518.1	MSTRG.4518.2,MSTRG.4518.1
Scaffold_2	Ppup112900	Ppup112900;A3:Scaffold_2:4886301-4887058:4886301-4887073:+	PB.1110.2	PB.1110.2,PB.1110.1,PB.1110.3
Scaffold_2	Ppup113090	Ppup113090;A3:Scaffold_2:5031660-5031759:5031660-5031791:+	MSTRG.4544.1,MSTRG.4544.5,MSTRG.4544.7	MSTRG.4544.1,MSTRG.4544.5,MSTRG.4544.6,MSTRG.4544.7,MSTRG.4544.2,MSTRG.4544.3,MSTRG.4544.4
Scaffold_2	Ppup113090	Ppup113090;A3:Scaffold_2:5032266-5032375:5032266-5032455:+	MSTRG.4544.2,MSTRG.4544.3	MSTRG.4544.1,MSTRG.4544.6,MSTRG.4544.2,MSTRG.4544.3,MSTRG.4544.4
Scaffold_2	Ppup113230	Ppup113230;A3:Scaffold_2:5168643-5169011:5168643-5169044:+	PB.1130.2,PB.1130.5	PB.1130.4,PB.1130.5,PB.1130.1,PB.1130.2
Scaffold_2	Ppup113230	Ppup113230;A3:Scaffold_2:5170848-5170934:5170848-5170940:+	PB.1130.2,PB.1130.1,PB.1130.5	PB.1130.4,PB.1130.5,PB.1130.1,PB.1130.2
Scaffold_2	Ppup113400	Ppup113400;A3:Scaffold_2:5288161-5288380:5288161-5288501:+	MSTRG.4576.1	MSTRG.4576.1,MSTRG.4576.3
Scaffold_2	Ppup114240	Ppup114240;A3:Scaffold_2:6602357-6602565:6602357-6602601:+	PB.1193.1,PB.1193.2	PB.1193.1,PB.1193.2,PB.1193.6
Scaffold_2	Ppup114320	Ppup114320;A3:Scaffold_2:6690511-6690669:6690511-6690672:+	PB.1196.34	PB.1196.34,PB.1196.35
Scaffold_2	Ppup115020	Ppup115020;A3:Scaffold_2:8253711-8255777:8253711-8255852:+	PB.1239.1	PB.1239.1,PB.1239.2
Scaffold_2	Ppup115040	Ppup115040;A3:Scaffold_2:8280798-8281312:8280798-8281327:+	PB.1241.12,PB.1241.16,PB.1241.28	PB.1241.16,PB.1241.26,PB.1241.12,PB.1241.28,PB.1241.29,PB.1241.18,PB.1241.32,PB.1241.3
Scaffold_2	Ppup115040	Ppup115040;A3:Scaffold_2:8283345-8283489:8283345-8283498:+	PB.1241.16,PB.1241.18,PB.1241.29	PB.1241.16,PB.1241.26,PB.1241.12,PB.1241.29,PB.1241.18,PB.1241.32,PB.1241.3
Scaffold_2	Ppup115100	Ppup115100;A3:Scaffold_2:8321324-8323287:8321324-8323302:+	PB.1244.14	PB.1244.14,PB.1244.12,PB.1244.3,PB.1244.9
Scaffold_2	Ppup115100	Ppup115100;A3:Scaffold_2:8323084-8323301:8323084-8323302:+	PB.1244.1	PB.1244.1,PB.1244.13
Scaffold_2	Ppup115100	Ppup115100;A3:Scaffold_2:8323372-8323862:8323372-8323865:+	PB.1244.12	PB.1244.12,PB.1244.1,PB.1244.9,PB.1244.13
Scaffold_2	Ppup115130	Ppup115130;A3:Scaffold_2:8377497-8377570:8377497-8377573:+	PB.1247.14	PB.1247.11,PB.1247.1,PB.1247.2,PB.1247.14,PB.1247.12,PB.1247.4,PB.1247.15,PB.1247.8,PB.1247.9,PB.1247.3
Scaffold_2	Ppup115170	Ppup115170;A3:Scaffold_2:8400645-8402478:8400645-8402483:+	PB.1251.2	PB.1251.1,PB.1251.2
Scaffold_2	Ppup115270	Ppup115270;A3:Scaffold_2:8461327-8461390:8461327-8461453:+	PB.1257.2,PB.1257.3	PB.1257.1,PB.1257.3,PB.1257.2
Scaffold_2	Ppup115360	Ppup115360;A3:Scaffold_2:8511237-8511623:8511237-8511656:+	PB.1268.5	PB.1268.5,PB.1268.3,PB.1268.2
Scaffold_207	Ppup164570_Ppup164590_Ppup164580	Ppup164570_Ppup164590_Ppup164580;A3:Scaffold_207:244076-244720:243868-244720:-	PB.7792.1,PB.7792.19	PB.7792.1,PB.7792.18,PB.7792.19
Scaffold_207	Ppup164570_Ppup164590_Ppup164580	Ppup164570_Ppup164590_Ppup164580;A3:Scaffold_207:244076-244610:244065-244610:-	PB.7792.3	PB.7792.10,PB.7792.3
Scaffold_207	Ppup164570_Ppup164590_Ppup164580	Ppup164570_Ppup164590_Ppup164580;A3:Scaffold_207:244076-244560:244065-244560:-	PB.7792.8,PB.7792.15	PB.7792.6,PB.7792.15,PB.7792.8
Scaffold_207	Ppup164570_Ppup164590_Ppup164580	Ppup164570_Ppup164590_Ppup164580;A3:Scaffold_207:244114-244560:244065-244560:-	PB.7792.14	PB.7792.14,PB.7792.6
Scaffold_207	Ppup164570_Ppup164590_Ppup164580	Ppup164570_Ppup164590_Ppup164580;A3:Scaffold_207:244114-244560:244076-244560:-	PB.7792.14	PB.7792.14,PB.7792.15,PB.7792.8
Scaffold_21	Ppup047880	Ppup047880;A3:Scaffold_21:18943-19158:18943-19516:+	PB.4594.1	PB.4594.1,PB.4594.4
Scaffold_21	Ppup047880	Ppup047880;A3:Scaffold_21:18943-19158:18943-19644:+	PB.4594.1	PB.4594.1,PB.4594.6,PB.4594.8
Scaffold_21	Ppup047880	Ppup047880;A3:Scaffold_21:18943-19516:18943-19644:+	PB.4594.4	PB.4594.8,PB.4594.6,PB.4594.4
Scaffold_21	Ppup048450	Ppup048450;A3:Scaffold_21:416025-416080:416025-416101:+	PB.4631.13	PB.4631.13,PB.4631.8,PB.4631.4
Scaffold_21	Ppup048450	Ppup048450;A3:Scaffold_21:419576-419652:419576-419667:+	PB.4631.13	PB.4631.13,PB.4631.11
Scaffold_21	Ppup048450	Ppup048450;A3:Scaffold_21:419576-419652:419576-419653:+	PB.4631.13	PB.4631.13,PB.4631.3,PB.4631.5,PB.4631.4
Scaffold_21	Ppup048450	Ppup048450;A3:Scaffold_21:419576-419653:419576-419667:+	PB.4631.3,PB.4631.4,PB.4631.5	PB.4631.11,PB.4631.3,PB.4631.5,PB.4631.4
Scaffold_21	Ppup048800	Ppup048800;A3:Scaffold_21:792611-792689:792611-792692:+	PB.4643.7,PB.4643.10,PB.4643.1,PB.4643.4,PB.4643.3	PB.4643.1,PB.4643.3,PB.4643.4,PB.4643.7,PB.4643.10,PB.4643.11
Scaffold_21	Ppup049210	Ppup049210;A3:Scaffold_21:1249051-1249660:1249051-1249720:+	PB.4673.1,PB.4673.3	PB.4673.3,PB.4673.4,PB.4673.7,PB.4673.8,PB.4673.1
Scaffold_21	Ppup049290	Ppup049290;A3:Scaffold_21:1317437-1317526:1317437-1317532:+	PB.4677.2,PB.4677.7	PB.4677.6,PB.4677.7,PB.4677.2
Scaffold_21	Ppup050170	Ppup050170;A3:Scaffold_21:2800884-2801922:2800884-2801926:+	PB.4725.3	PB.4725.6,PB.4725.3
Scaffold_21	Ppup050320	Ppup050320;A3:Scaffold_21:2942354-2942599:2942354-2942614:+	PB.4736.2,PB.4736.5,PB.4736.14,PB.4736.16	PB.4736.5,PB.4736.8,PB.4736.12,PB.4736.14,PB.4736.13,PB.4736.1,PB.4736.16,PB.4736.15,PB.4736.20,PB.4736.19,PB.4736.2,PB.4736.3
Scaffold_21	Ppup050410	Ppup050410;A3:Scaffold_21:2991129-2993328:2991129-2993331:+	PB.4743.15,PB.4743.14,PB.4743.11,PB.4743.1,PB.4743.3,PB.4743.9,PB.4743.4,PB.4743.6	PB.4743.4,PB.4743.6,PB.4743.11,PB.4743.1,PB.4743.14,PB.4743.10,PB.4743.9,PB.4743.15,PB.4743.3
Scaffold_21	Ppup050480	Ppup050480;A3:Scaffold_21:3091965-3092293:3091965-3092296:+	PB.4746.2	PB.4746.1,PB.4746.2
Scaffold_21	Ppup050770	Ppup050770;A3:Scaffold_21:3372174-3372269:3372174-3372329:+	PB.4766.3	PB.4766.2,PB.4766.3
Scaffold_21	Ppup050800	Ppup050800;A3:Scaffold_21:3379681-3388237:3379681-3388244:+	PB.4768.5,PB.4768.4,PB.4768.7,PB.4768.3,PB.4768.2,PB.4768.1	PB.4768.3,PB.4768.2,PB.4768.10,PB.4768.4,PB.4768.1,PB.4768.7,PB.4768.5
Scaffold_21	Ppup050800	Ppup050800;A3:Scaffold_21:3394323-3398327:3394323-3398328:+	PB.4768.8	PB.4768.24,PB.4768.8,PB.4768.11,PB.4768.3,PB.4768.12,PB.4768.2,PB.4768.20,PB.4768.16,PB.4768.10,PB.4768.18,PB.4768.4,PB.4768.15,PB.4768.1,PB.4768.7,PB.4768.19,PB.4768.5
Scaffold_21	Ppup050810	Ppup050810;A3:Scaffold_21:3410434-3410776:3410434-3411178:+	PB.4769.2,PB.4769.1	PB.4769.3,PB.4769.2,PB.4769.6,PB.4769.5,PB.4769.4,PB.4769.1
Scaffold_21	Ppup047890	Ppup047890;A3:Scaffold_21:23712-23801:23700-23801:-	PB.4595.1,PB.4595.3,PB.4595.4,PB.4595.7,PB.4595.10,PB.4595.9	PB.4595.10,PB.4595.5,PB.4595.1,PB.4595.12,PB.4595.4,PB.4595.7,PB.4595.3,PB.4595.9
Scaffold_21	Ppup048090	Ppup048090;A3:Scaffold_21:167999-171742:161340-171742:-	MSTRGCarcass.4527.4	MSTRGCarcass.4527.4,MSTRGCarcass.4527.2
Scaffold_21	Ppup048090	Ppup048090;A3:Scaffold_21:169016-171742:161340-171742:-	MSTRGCarcass.4527.5	MSTRGCarcass.4527.5,MSTRGCarcass.4527.2
Scaffold_21	Ppup048090	Ppup048090;A3:Scaffold_21:169016-171742:167999-171742:-	MSTRGCarcass.4527.5	MSTRGCarcass.4527.4,MSTRGCarcass.4527.5
Scaffold_21	Ppup048340	Ppup048340;A3:Scaffold_21:340723-341432:340695-341432:-	PB.4622.12,PB.4622.17	PB.4622.17,PB.4622.12,PB.4622.2
Scaffold_21	Ppup048340	Ppup048340;A3:Scaffold_21:340723-340799:340695-340799:-	PB.4622.15,PB.4622.16,PB.4622.9,PB.4622.5	PB.4622.9,PB.4622.16,PB.4622.10,PB.4622.15,PB.4622.8,PB.4622.1,PB.4622.5
Scaffold_21	Ppup048420	Ppup048420;A3:Scaffold_21:391850-391947:391838-391947:-	PB.4628.19	PB.4628.19,PB.4628.18,PB.4628.23,PB.4628.20,PB.4628.27,PB.4628.11,PB.4628.6
Scaffold_21	Ppup048770	Ppup048770;A3:Scaffold_21:781716-781870:781704-781870:-	PB.4641.3	PB.4641.3,PB.4641.2
Scaffold_21	Ppup048770	Ppup048770;A3:Scaffold_21:781716-781870:781706-781870:-	PB.4641.3	PB.4641.6,PB.4641.3
Scaffold_21	Ppup048770	Ppup048770;A3:Scaffold_21:781706-781870:781704-781870:-	PB.4641.6	PB.4641.6,PB.4641.2
Scaffold_21	Ppup048840	Ppup048840;A3:Scaffold_21:808064-808154:807710-808154:-	PB.4646.2	PB.4646.2,PB.4646.1
Scaffold_21	Ppup048940	Ppup048940;A3:Scaffold_21:871357-871421:871308-871421:-	PB.4651.1	PB.4651.3,PB.4651.1
Scaffold_21	Ppup048940	Ppup048940;A3:Scaffold_21:871357-871421:871292-871421:-	PB.4651.1	PB.4651.4,PB.4651.1
Scaffold_21	Ppup048940	Ppup048940;A3:Scaffold_21:871308-871421:871292-871421:-	PB.4651.3	PB.4651.3,PB.4651.4
Scaffold_21	Ppup049100	Ppup049100;A3:Scaffold_21:1164899-1179839:1164896-1179839:-	PB.4662.1,PB.4662.2,PB.4662.3,PB.4662.5,PB.4662.8	PB.4662.5,PB.4662.8,PB.4662.1,PB.4662.9,PB.4662.3,PB.4662.2
Scaffold_21	Ppup049100	Ppup049100;A3:Scaffold_21:1164247-1164325:1164214-1164325:-	PB.4662.5,PB.4662.9	PB.4662.5,PB.4662.8,PB.4662.6,PB.4662.1,PB.4662.9
Scaffold_21	Ppup049480	Ppup049480;A3:Scaffold_21:1533736-1534284:1533707-1534284:-	PB.4691.23	PB.4691.23,PB.4691.24
Scaffold_21	Ppup049720	Ppup049720;A3:Scaffold_21:2184413-2184867:2184407-2184867:-	PB.4703.2	PB.4703.3,PB.4703.2
Scaffold_21	Ppup050210	Ppup050210;A3:Scaffold_21:2834902-2835000:2834901-2835000:-	PB.4728.3	PB.4728.2,PB.4728.1,PB.4728.3
Scaffold_21	Ppup050240	Ppup050240;A3:Scaffold_21:2859889-2860356:2859877-2860356:-	PB.4731.1	PB.4731.1,PB.4731.2
Scaffold_21	Ppup050380	Ppup050380;A3:Scaffold_21:2970730-2970903:2970716-2970903:-	PB.4742.7,PB.4742.4,PB.4742.2,PB.4742.28	PB.4742.28,PB.4742.4,PB.4742.29,PB.4742.2,PB.4742.3,PB.4742.6,PB.4742.7
Scaffold_21	Ppup050660	Ppup050660;A3:Scaffold_21:3260624-3260697:3258542-3260697:-	PB.4757.4	PB.4757.10,PB.4757.2,PB.4757.4
Scaffold_21	Ppup050690	Ppup050690;A3:Scaffold_21:3281685-3281762:3281669-3281762:-	PB.4760.3	PB.4760.1,PB.4760.2,PB.4760.3
Scaffold_21	Ppup050970	Ppup050970;A3:Scaffold_21:3609363-3609980:3609345-3609980:-	PB.4776.2,PB.4776.4,PB.4776.9	PB.4776.8,PB.4776.1,PB.4776.9,PB.4776.4,PB.4776.2,PB.4776.7
Scaffold_21	Ppup051070	Ppup051070;A3:Scaffold_21:3709108-3709232:3709081-3709232:-	PB.4780.2	PB.4780.1,PB.4780.2
Scaffold_217592	Ppup135410_Ppup135400	Ppup135410_Ppup135400;A3:Scaffold_217592:112217-112298:112201-112298:-	PB.8598.11	PB.8598.11,PB.8598.9
Scaffold_217592	Ppup135410_Ppup135400	Ppup135410_Ppup135400;A3:Scaffold_217592:111398-111498:111072-111498:-	PB.8598.8	PB.8598.7,PB.8598.8
Scaffold_219	Ppup151590	Ppup151590;A3:Scaffold_219:1192623-1192687:1192611-1192687:-	PB.7876.4	PB.7876.2,PB.7876.4
Scaffold_219	Ppup150740	Ppup150740;A3:Scaffold_219:298609-298692:298609-298695:+	PB.7814.2,PB.7814.3,PB.7814.1	PB.7814.1,PB.7814.3,PB.7814.2,PB.7814.6
Scaffold_219	Ppup151110	Ppup151110;A3:Scaffold_219:605579-605656:605579-605671:+	PB.7846.2,PB.7846.3	PB.7846.4,PB.7846.2,PB.7846.3
Scaffold_219	Ppup151280	Ppup151280;A3:Scaffold_219:750797-750853:750797-750869:+	PB.7854.9	PB.7854.2,PB.7854.6,PB.7854.12,PB.7854.5,PB.7854.9,PB.7854.1,PB.7854.3
Scaffold_219	Ppup151350_Ppup151340	Ppup151350_Ppup151340;A3:Scaffold_219:819440-820389:819440-820439:+	PB.7860.1,PB.7860.2,PB.7860.4,PB.7860.5,PB.7860.8	PB.7860.6,PB.7860.8,PB.7860.3,PB.7860.5,PB.7860.2,PB.7860.1,PB.7860.4
Scaffold_219	Ppup151350_Ppup151340	Ppup151350_Ppup151340;A3:Scaffold_219:822532-822779:822532-822790:+	PB.7860.4,PB.7860.6,PB.7860.8	PB.7860.8,PB.7860.6,PB.7860.5,PB.7860.4
Scaffold_219	Ppup151370	Ppup151370;A3:Scaffold_219:827365-827434:827365-827449:+	PB.7862.1	PB.7862.1,PB.7862.2
Scaffold_219857	Ppup150450	Ppup150450;A3:Scaffold_219857:10477-10916:10477-11267:+	MSTRG.5165.6	MSTRG.5165.2,MSTRG.5165.3,MSTRG.5165.6,MSTRG.5165.5
Scaffold_231	Ppup016900	Ppup016900;A3:Scaffold_231:383860-385490:383800-385490:-	PB.7901.1,PB.7901.3,PB.7901.11,PB.7901.12,PB.7901.7,PB.7901.15	PB.7901.3,PB.7901.8,PB.7901.12,PB.7901.7,PB.7901.15,PB.7901.11,PB.7901.1
Scaffold_231	Ppup016900	Ppup016900;A3:Scaffold_231:384291-385490:383860-385490:-	PB.7901.2,PB.7901.4,PB.7901.6,PB.7901.14	PB.7901.3,PB.7901.6,PB.7901.4,PB.7901.12,PB.7901.14,PB.7901.2,PB.7901.7,PB.7901.15,PB.7901.11,PB.7901.1
Scaffold_231	Ppup016900	Ppup016900;A3:Scaffold_231:384291-385490:383800-385490:-	PB.7901.2,PB.7901.4,PB.7901.6,PB.7901.14	PB.7901.8,PB.7901.6,PB.7901.4,PB.7901.14,PB.7901.2
Scaffold_238	Ppup152280	Ppup152280;A3:Scaffold_238:697497-700174:697385-700174:-	PB.7938.2	PB.7938.6,PB.7938.2,PB.7938.5
Scaffold_238	Ppup152340	Ppup152340;A3:Scaffold_238:749850-750049:749841-750049:-	PB.7941.3	PB.7941.3,PB.7941.6
Scaffold_247	Ppup001810	Ppup001810;A3:Scaffold_247:245096-245269:245096-245272:+	PB.8001.4,PB.8001.3,PB.8001.7,PB.8001.1,PB.8001.9	PB.8001.8,PB.8001.2,PB.8001.9,PB.8001.4,PB.8001.3,PB.8001.7,PB.8001.1
Scaffold_247	Ppup001810	Ppup001810;A3:Scaffold_247:244215-244754:244215-244772:+	PB.8001.1	PB.8001.8,PB.8001.2,PB.8001.9,PB.8001.4,PB.8001.3,PB.8001.7,PB.8001.1
Scaffold_247	Ppup001840	Ppup001840;A3:Scaffold_247:269452-269699:269452-269718:+	PB.8004.11,PB.8004.10,PB.8004.9,PB.8004.5,PB.8004.6,PB.8004.7,PB.8004.8,PB.8004.2,PB.8004.3,PB.8004.4,PB.8004.1	PB.8004.9,PB.8004.6,PB.8004.7,PB.8004.2,PB.8004.12,PB.8004.8,PB.8004.4,PB.8004.3,PB.8004.11,PB.8004.10,PB.8004.1,PB.8004.5
Scaffold_247	Ppup001840	Ppup001840;A3:Scaffold_247:272540-272809:272540-272880:+	PB.8004.7,PB.8004.3	PB.8004.9,PB.8004.6,PB.8004.7,PB.8004.2,PB.8004.8,PB.8004.4,PB.8004.3,PB.8004.10,PB.8004.1,PB.8004.5
Scaffold_247	Ppup001710	Ppup001710;A3:Scaffold_247:75420-77016:75368-77016:-	PB.7991.4,PB.7991.6	PB.7991.7,PB.7991.4,PB.7991.6
Scaffold_247	Ppup001710	Ppup001710;A3:Scaffold_247:75420-76805:75368-76805:-	PB.7991.5,PB.7991.17	PB.7991.5,PB.7991.14,PB.7991.17
Scaffold_248	Ppup002050	Ppup002050;A3:Scaffold_248:99149-160896:99149-160899:+	MSTRG.5453.1	MSTRG.5453.1,MSTRG.5453.2
Scaffold_25	Ppup165030	Ppup165030;A3:Scaffold_25:21418-21974:21418-22007:+	PB.4810.4	PB.4810.3,PB.4810.1,PB.4810.4
Scaffold_25	Ppup165050	Ppup165050;A3:Scaffold_25:95954-96527:95954-96545:+	PB.4813.8,PB.4813.13,PB.4813.3	PB.4813.8,PB.4813.13,PB.4813.2,PB.4813.4,PB.4813.12,PB.4813.3,PB.4813.9
Scaffold_25	Ppup165050	Ppup165050;A3:Scaffold_25:96613-99109:96613-99952:+	PB.4813.12,PB.4813.13	PB.4813.8,PB.4813.13,PB.4813.4,PB.4813.12,PB.4813.3
Scaffold_25	Ppup165050	Ppup165050;A3:Scaffold_25:96613-98523:96613-99952:+	PB.4813.2	PB.4813.2,PB.4813.4,PB.4813.8,PB.4813.3
Scaffold_25	Ppup165050	Ppup165050;A3:Scaffold_25:96613-98523:96613-99109:+	PB.4813.2	PB.4813.2,PB.4813.13,PB.4813.12
Scaffold_25	Ppup165080	Ppup165080;A3:Scaffold_25:112180-112550:112180-112562:+	PB.4816.2	PB.4816.1,PB.4816.2
Scaffold_25	Ppup165140	Ppup165140;A3:Scaffold_25:205153-205243:205153-205249:+	MSTRG.5475.2	MSTRG.5475.2,MSTRG.5475.3
Scaffold_25	novelGenePB.4825	novelGenePB.4825;A3:Scaffold_25:228066-228932:228066-228942:+	PB.4825.1	PB.4825.2,PB.4825.1
Scaffold_25	Ppup165660	Ppup165660;A3:Scaffold_25:753939-754044:753939-754107:+	MSTRG.5534.1	MSTRG.5534.1,MSTRG.5534.2
Scaffold_25	Ppup165910	Ppup165910;A3:Scaffold_25:890460-890532:890460-890545:+	PB.4874.17,PB.4874.16	PB.4874.17,PB.4874.16,PB.4874.18
Scaffold_25	Ppup166000	Ppup166000;A3:Scaffold_25:990829-991060:990829-991254:+	PB.4883.6,PB.4883.4	PB.4883.4,PB.4883.7,PB.4883.5,PB.4883.6
Scaffold_25	Ppup166470	Ppup166470;A3:Scaffold_25:1432293-1433246:1432293-1433285:+	PB.4920.2,PB.4920.3	PB.4920.5,PB.4920.2,PB.4920.1,PB.4920.4,PB.4920.3
Scaffold_25	Ppup166470	Ppup166470;A3:Scaffold_25:1435863-1436206:1435863-1436218:+	PB.4920.2,PB.4920.5	PB.4920.5,PB.4920.2,PB.4920.1,PB.4920.4,PB.4920.3
Scaffold_25	Ppup166580	Ppup166580;A3:Scaffold_25:1562243-1562509:1562243-1562512:+	PB.4934.6	PB.4934.6,PB.4934.2,PB.4934.3
Scaffold_25	Ppup166650	Ppup166650;A3:Scaffold_25:1597325-1597502:1597325-1597514:+	PB.4938.4,PB.4938.3,PB.4938.6,PB.4938.11,PB.4938.21,PB.4938.20	PB.4938.1,PB.4938.12,PB.4938.20,PB.4938.21,PB.4938.3,PB.4938.8,PB.4938.9,PB.4938.11,PB.4938.6,PB.4938.4,PB.4938.2,PB.4938.10,PB.4938.7,PB.4938.16,PB.4938.14,PB.4938.5,PB.4938.13
Scaffold_25	Ppup167230	Ppup167230;A3:Scaffold_25:2220509-2221148:2220509-2222084:+	PB.4975.1,PB.4975.2,PB.4975.5,PB.4975.4,PB.4975.9,PB.4975.8	PB.4975.4,PB.4975.1,PB.4975.11,PB.4975.10,PB.4975.5,PB.4975.6,PB.4975.2,PB.4975.8,PB.4975.12,PB.4975.9,PB.4975.7
Scaffold_25	Ppup167230	Ppup167230;A3:Scaffold_25:2213254-2214102:2213254-2214207:+	PB.4975.2	PB.4975.2,PB.4975.1
Scaffold_25	Ppup167470	Ppup167470;A3:Scaffold_25:2349968-2351875:2349968-2351889:+	PB.4992.1	PB.4992.2,PB.4992.1
Scaffold_25	Ppup167750	Ppup167750;A3:Scaffold_25:2911945-2912034:2911945-2912060:+	PB.5008.19,PB.5008.31,PB.5008.8,PB.5008.30,PB.5008.10,PB.5008.1,PB.5008.11,PB.5008.12,PB.5008.13,PB.5008.14,PB.5008.16,PB.5008.17,PB.5008.18,PB.5008.2,PB.5008.22,PB.5008.23,PB.5008.25,PB.5008.26,PB.5008.27,PB.5008.28,PB.5008.29,PB.5008.3,PB.5008.33,PB.5008.4,PB.5008.5,PB.5008.6,PB.5008.7,PB.5008.9,PB.5008.15	PB.5008.6,PB.5008.7,PB.5008.19,PB.5008.16,PB.5008.25,PB.5008.34,PB.5008.14,PB.5008.27,PB.5008.29,PB.5008.12,PB.5008.4,PB.5008.13,PB.5008.5,PB.5008.18,PB.5008.11,PB.5008.22,PB.5008.10,PB.5008.1,PB.5008.26,PB.5008.9,PB.5008.15,PB.5008.33,PB.5008.17,PB.5008.8,PB.5008.30,PB.5008.3,PB.5008.2,PB.5008.28,PB.5008.23,PB.5008.31
Scaffold_25	Ppup167750	Ppup167750;A3:Scaffold_25:2912316-2912408:2912316-2912410:+	PB.5008.16	PB.5008.26,PB.5008.7,PB.5008.31,PB.5008.30,PB.5008.19,PB.5008.16,PB.5008.9,PB.5008.15,PB.5008.2,PB.5008.34,PB.5008.5,PB.5008.18,PB.5008.29,PB.5008.17,PB.5008.4,PB.5008.23,PB.5008.8,PB.5008.13
Scaffold_25	Ppup168010	Ppup168010;A3:Scaffold_25:3113295-3113378:3113295-3116258:+	PB.5020.8	PB.5020.4,PB.5020.8,PB.5020.1
Scaffold_25	Ppup168100	Ppup168100;A3:Scaffold_25:3404036-3404123:3404036-3404136:+	PB.5025.6,PB.5025.5,PB.5025.1,PB.5025.2,PB.5025.12,PB.5025.13,PB.5025.11,PB.5025.14,PB.5025.8,PB.5025.10,PB.5025.15,PB.5025.16,PB.5025.17,PB.5025.18,PB.5025.20	PB.5025.5,PB.5025.13,PB.5025.12,PB.5025.20,PB.5025.1,PB.5025.10,PB.5025.14,PB.5025.16,PB.5025.6,PB.5025.2,PB.5025.8,PB.5025.15,PB.5025.17,PB.5025.19,PB.5025.18,PB.5025.11
Scaffold_25	Ppup168300	Ppup168300;A3:Scaffold_25:3882890-3883729:3882890-3883756:+	MSTRG.5761.2	MSTRG.5761.2,MSTRG.5761.1
Scaffold_25	novelGeneAS120	novelGeneAS120;A3:Scaffold_25:4726276-4726366:4726276-4726384:+	MSTRG.5829.1,MSTRG.5829.3	MSTRG.5829.1,MSTRG.5829.3,MSTRG.5829.4
Scaffold_25	Ppup169540	Ppup169540;A3:Scaffold_25:5202293-5202365:5202293-5202377:+	PB.5105.2	PB.5105.3,PB.5105.2
Scaffold_25	Ppup165680	Ppup165680;A3:Scaffold_25:766994-767084:766948-767084:-	PB.4859.2	PB.4859.2,PB.4859.1
Scaffold_25	Ppup166110_Ppup166120	Ppup166110_Ppup166120;A3:Scaffold_25:1097547-1097692:1097517-1097692:-	PB.4894.1,PB.4894.2,PB.4894.3,PB.4894.4,PB.4894.6	PB.4894.2,PB.4894.1,PB.4894.5,PB.4894.6,PB.4894.3,PB.4894.4
Scaffold_25	Ppup166110_Ppup166120	Ppup166110_Ppup166120;A3:Scaffold_25:1105096-1105303:1105091-1105303:-	PB.4894.2,PB.4894.3,PB.4894.4,PB.4894.5,PB.4894.6	PB.4894.2,PB.4894.1,PB.4894.5,PB.4894.6,PB.4894.3,PB.4894.4
Scaffold_25	Ppup166680	Ppup166680;A3:Scaffold_25:1625332-1626492:1625329-1626492:-	PB.4941.4,PB.4941.6,PB.4941.15,PB.4941.20	PB.4941.6,PB.4941.5,PB.4941.4,PB.4941.18,PB.4941.20,PB.4941.15
Scaffold_25	Ppup166710	Ppup166710;A3:Scaffold_25:1690566-1690626:1690543-1690626:-	PB.4942.4	PB.4942.9,PB.4942.5,PB.4942.4,PB.4942.3,PB.4942.1
Scaffold_25	Ppup166930	Ppup166930;A3:Scaffold_25:1926646-1927107:1926586-1927107:-	PB.4954.2	PB.4954.1,PB.4954.2
Scaffold_25	Ppup167320	Ppup167320;A3:Scaffold_25:2296964-2297041:2296937-2297041:-	PB.4982.2,PB.4982.4,PB.4982.6,PB.4982.3,PB.4982.10,PB.4982.13	PB.4982.4,PB.4982.10,PB.4982.6,PB.4982.13,PB.4982.3,PB.4982.2,PB.4982.8
Scaffold_25	Ppup167320	Ppup167320;A3:Scaffold_25:2296032-2296434:2296029-2296434:-	PB.4982.4	PB.4982.4,PB.4982.10
Scaffold_25	Ppup167320	Ppup167320;A3:Scaffold_25:2296977-2297041:2296964-2297041:-	PB.4982.12	PB.4982.4,PB.4982.10,PB.4982.6,PB.4982.12,PB.4982.13,PB.4982.3,PB.4982.2
Scaffold_25	Ppup167320	Ppup167320;A3:Scaffold_25:2296977-2297041:2296937-2297041:-	PB.4982.12	PB.4982.8,PB.4982.12
Scaffold_25	Ppup167580	Ppup167580;A3:Scaffold_25:2433618-2434262:2433477-2434262:-	PB.5001.2,PB.5001.4,PB.5001.19,PB.5001.12,PB.5001.14,PB.5001.11,PB.5001.21	PB.5001.21,PB.5001.16,PB.5001.19,PB.5001.11,PB.5001.1,PB.5001.22,PB.5001.14,PB.5001.2,PB.5001.12,PB.5001.8,PB.5001.4
Scaffold_25	Ppup167580	Ppup167580;A3:Scaffold_25:2433618-2434528:2433477-2434528:-	PB.5001.10,PB.5001.13	PB.5001.10,PB.5001.17,PB.5001.13
Scaffold_25	Ppup167600	Ppup167600;A3:Scaffold_25:2448984-2449057:2448981-2449057:-	PB.5002.11,PB.5002.23	PB.5002.11,PB.5002.9,PB.5002.23,PB.5002.16
Scaffold_25	Ppup167600	Ppup167600;A3:Scaffold_25:2448993-2449057:2448984-2449057:-	PB.5002.7	PB.5002.11,PB.5002.23,PB.5002.7
Scaffold_25	Ppup167600	Ppup167600;A3:Scaffold_25:2448993-2449057:2448981-2449057:-	PB.5002.7	PB.5002.9,PB.5002.7,PB.5002.16
Scaffold_25	Ppup167630	Ppup167630;A3:Scaffold_25:2456121-2456404:2455320-2456404:-	PB.5004.14	PB.5004.2,PB.5004.5,PB.5004.16,PB.5004.24,PB.5004.22,PB.5004.14,PB.5004.7,PB.5004.3,PB.5004.11,PB.5004.8,PB.5004.21
Scaffold_25	Ppup167630	Ppup167630;A3:Scaffold_25:2456121-2456404:2455520-2456404:-	PB.5004.14	PB.5004.14,PB.5004.4,PB.5004.20,PB.5004.15
Scaffold_25	Ppup167810	Ppup167810;A3:Scaffold_25:3017893-3018609:3017890-3018609:-	PB.5011.3	PB.5011.3,PB.5011.6,PB.5011.7
Scaffold_25	Ppup167810	Ppup167810;A3:Scaffold_25:3017893-3018609:3017891-3018609:-	PB.5011.3	PB.5011.3,PB.5011.1,PB.5011.8
Scaffold_25	Ppup167810	Ppup167810;A3:Scaffold_25:3017866-3018586:3017865-3018586:-	PB.5011.2	PB.5011.2,PB.5011.5
Scaffold_25	Ppup167810	Ppup167810;A3:Scaffold_25:3017891-3018609:3017890-3018609:-	PB.5011.1,PB.5011.8	PB.5011.1,PB.5011.6,PB.5011.8,PB.5011.7
Scaffold_25	Ppup168250	Ppup168250;A3:Scaffold_25:3822328-3822397:3822255-3822397:-	PB.5029.4	PB.5029.4,PB.5029.5
Scaffold_25	Ppup168270	Ppup168270;A3:Scaffold_25:3836127-3836204:3836058-3836204:-	PB.5031.1,PB.5031.10,PB.5031.11,PB.5031.12,PB.5031.5,PB.5031.6,PB.5031.4,PB.5031.14,PB.5031.18,PB.5031.21	PB.5031.4,PB.5031.18,PB.5031.12,PB.5031.1,PB.5031.10,PB.5031.21,PB.5031.14,PB.5031.11,PB.5031.6,PB.5031.13,PB.5031.5
Scaffold_25	Ppup168270	Ppup168270;A3:Scaffold_25:3836127-3836204:3836109-3836204:-	PB.5031.1,PB.5031.10,PB.5031.11,PB.5031.12,PB.5031.5,PB.5031.6,PB.5031.4,PB.5031.14,PB.5031.18,PB.5031.21	PB.5031.4,PB.5031.18,PB.5031.23,PB.5031.12,PB.5031.1,PB.5031.10,PB.5031.21,PB.5031.14,PB.5031.11,PB.5031.6,PB.5031.5
Scaffold_25	Ppup168270	Ppup168270;A3:Scaffold_25:3836109-3836204:3836058-3836204:-	PB.5031.23	PB.5031.23,PB.5031.13
Scaffold_25	Ppup168280	Ppup168280;A3:Scaffold_25:3845690-3848923:3844745-3848923:-	PB.5032.15	PB.5032.6,PB.5032.19,PB.5032.2,PB.5032.15,PB.5032.29,PB.5032.9,PB.5032.5,PB.5032.17,PB.5032.27,PB.5032.16,PB.5032.26,PB.5032.8,PB.5032.3,PB.5032.25,PB.5032.4,PB.5032.7,PB.5032.23
Scaffold_25	Ppup169380	Ppup169380;A3:Scaffold_25:4911445-4911517:4911433-4911517:-	PB.5095.2	PB.5095.2,PB.5095.1
Scaffold_25	novelGeneAS121	novelGeneAS121;A3:Scaffold_25:5330245-5330328:5330239-5330328:-	MSTRG.5865.3	MSTRG.5865.4,MSTRG.5865.3
Scaffold_25	Ppup169770	Ppup169770;A3:Scaffold_25:5584260-5585145:5584245-5585145:-	PB.5121.2,PB.5121.3,PB.5121.5,PB.5121.15,PB.5121.21	PB.5121.17,PB.5121.21,PB.5121.1,PB.5121.3,PB.5121.22,PB.5121.5,PB.5121.15,PB.5121.4,PB.5121.2
Scaffold_25	Ppup169820	Ppup169820;A3:Scaffold_25:5655684-5655747:5655672-5655747:-	PB.5126.2	PB.5126.2,PB.5126.5,PB.5126.6,PB.5126.4,PB.5126.3,PB.5126.1
Scaffold_26	novelGeneAS122	novelGeneAS122;A3:Scaffold_26:49603-49689:49337-49689:-	PB.5131.1	PB.5131.1,PB.5131.6
Scaffold_26	novelGeneAS122	novelGeneAS122;A3:Scaffold_26:49606-49689:49603-49689:-	PB.5131.2,PB.5131.3,PB.5131.5,PB.5131.7	PB.5131.7,PB.5131.2,PB.5131.5,PB.5131.1,PB.5131.3
Scaffold_26	novelGeneAS122	novelGeneAS122;A3:Scaffold_26:49606-49689:49337-49689:-	PB.5131.2,PB.5131.3,PB.5131.5,PB.5131.7	PB.5131.6,PB.5131.7,PB.5131.2,PB.5131.5,PB.5131.3
Scaffold_26	Ppup002250	Ppup002250;A3:Scaffold_26:57841-58229:57837-58229:-	PB.5132.1	PB.5132.9,PB.5132.1
Scaffold_26	Ppup002300	Ppup002300;A3:Scaffold_26:161462-162153:161438-162153:-	PB.5136.1	PB.5136.2,PB.5136.1
Scaffold_26	Ppup002680	Ppup002680;A3:Scaffold_26:1279854-1279922:1279842-1279922:-	PB.5153.1,PB.5153.5,PB.5153.6,PB.5153.7	PB.5153.7,PB.5153.1,PB.5153.6,PB.5153.2,PB.5153.5
Scaffold_26	Ppup002680	Ppup002680;A3:Scaffold_26:1278712-1278771:1278672-1278771:-	PB.5153.2,PB.5153.5	PB.5153.7,PB.5153.2,PB.5153.5
Scaffold_26	Ppup002780	Ppup002780;A3:Scaffold_26:1616401-1616483:1616383-1616483:-	PB.5159.2	PB.5159.2,PB.5159.4,PB.5159.6,PB.5159.5
Scaffold_26	Ppup002810	Ppup002810;A3:Scaffold_26:1634083-1634161:1634071-1634161:-	PB.5164.12,PB.5164.3,PB.5164.8,PB.5164.7	PB.5164.12,PB.5164.3,PB.5164.4,PB.5164.7,PB.5164.8
Scaffold_26	Ppup002870	Ppup002870;A3:Scaffold_26:1709698-1709768:1709685-1709768:-	PB.5169.2	PB.5169.1,PB.5169.2
Scaffold_26	Ppup003040	Ppup003040;A3:Scaffold_26:1794478-1794719:1794456-1794719:-	PB.5185.3,PB.5185.2	PB.5185.9,PB.5185.1,PB.5185.2,PB.5185.13,PB.5185.15,PB.5185.4,PB.5185.3,PB.5185.10
Scaffold_26	Ppup003170	Ppup003170;A3:Scaffold_26:1876127-1876518:1876117-1876518:-	PB.5198.4	PB.5198.4,PB.5198.3,PB.5198.16,PB.5198.2,PB.5198.5
Scaffold_26	Ppup003170	Ppup003170;A3:Scaffold_26:1874407-1875963:1874385-1875963:-	PB.5198.3	PB.5198.4,PB.5198.5,PB.5198.2,PB.5198.3
Scaffold_26	Ppup003420_Ppup003370	Ppup003420_Ppup003370;A3:Scaffold_26:2138268-2172757:2136566-2172757:-	PB.5210.21	PB.5210.19,PB.5210.21
Scaffold_26	Ppup004200	Ppup004200;A3:Scaffold_26:2943915-2944762:2943890-2944762:-	PB.5274.7	PB.5274.7,PB.5274.8
Scaffold_26	Ppup002290	Ppup002290;A3:Scaffold_26:158000-158191:158000-158493:+	PB.5135.3	PB.5135.3,PB.5135.1,PB.5135.2
Scaffold_26	Ppup002790	Ppup002790;A3:Scaffold_26:1622825-1623081:1622825-1623177:+	PB.5161.1	PB.5161.2,PB.5161.1,PB.5161.3
Scaffold_26	Ppup002970	Ppup002970;A3:Scaffold_26:1753450-1753527:1753450-1753556:+	PB.5179.4	PB.5179.3,PB.5179.2,PB.5179.4
Scaffold_26	Ppup003070	Ppup003070;A3:Scaffold_26:1827579-1827909:1827579-1827913:+	PB.5187.2,PB.5187.4	PB.5187.3,PB.5187.4,PB.5187.2
Scaffold_26	Ppup003120	Ppup003120;A3:Scaffold_26:1847462-1847536:1847462-1847539:+	PB.5193.1,PB.5193.2,PB.5193.4,PB.5193.7,PB.5193.11	PB.5193.7,PB.5193.2,PB.5193.11,PB.5193.1,PB.5193.5,PB.5193.4
Scaffold_26	Ppup003130	Ppup003130;A3:Scaffold_26:1852767-1852850:1852767-1852868:+	PB.5194.1	PB.5194.2,PB.5194.1
Scaffold_26	Ppup003150	Ppup003150;A3:Scaffold_26:1863031-1863132:1863031-1863143:+	PB.5196.1	PB.5196.1,PB.5196.2
Scaffold_26	Ppup003240	Ppup003240;A3:Scaffold_26:2076962-2078054:2076962-2078196:+	PB.5206.1	PB.5206.3,PB.5206.1
Scaffold_26	Ppup003270	Ppup003270;A3:Scaffold_26:2097742-2097829:2097742-2097845:+	PB.5209.3	PB.5209.1,PB.5209.4,PB.5209.3
Scaffold_26	Ppup003970	Ppup003970;A3:Scaffold_26:2578180-2578275:2578180-2578364:+	PB.5252.2	PB.5252.2,PB.5252.3
Scaffold_26	Ppup003970	Ppup003970;A3:Scaffold_26:2578180-2578275:2578180-2578407:+	PB.5252.2	PB.5252.4,PB.5252.2
Scaffold_26	Ppup003970	Ppup003970;A3:Scaffold_26:2578180-2578364:2578180-2578407:+	PB.5252.3	PB.5252.4,PB.5252.3
Scaffold_26	Ppup004150	Ppup004150;A3:Scaffold_26:2854048-2854330:2854048-2854345:+	PB.5267.2,PB.5267.10,PB.5267.3	PB.5267.7,PB.5267.8,PB.5267.9,PB.5267.3,PB.5267.4,PB.5267.1,PB.5267.2,PB.5267.10
Scaffold_26	Ppup004330	Ppup004330;A3:Scaffold_26:3121519-3121720:3121519-3121723:+	PB.5285.7,PB.5285.1,PB.5285.2,PB.5285.4,PB.5285.5	PB.5285.5,PB.5285.1,PB.5285.3,PB.5285.7,PB.5285.4,PB.5285.2
Scaffold_26	Ppup004420	Ppup004420;A3:Scaffold_26:3199026-3200118:3199026-3200136:+	PB.5291.1	PB.5291.1,PB.5291.2
Scaffold_260	Ppup109150	Ppup109150;A3:Scaffold_260:539391-540069:539391-540073:+	PB.8029.19	PB.8029.7,PB.8029.2,PB.8029.19,PB.8029.5,PB.8029.15,PB.8029.16,PB.8029.17,PB.8029.11
Scaffold_260	Ppup109310	Ppup109310;A3:Scaffold_260:641100-641212:641100-641215:+	PB.8041.2,PB.8041.3	PB.8041.2,PB.8041.1,PB.8041.3
Scaffold_260	Ppup109000	Ppup109000;A3:Scaffold_260:199041-199449:199026-199449:-	PB.8016.1,PB.8016.3,PB.8016.4	PB.8016.4,PB.8016.1,PB.8016.2,PB.8016.3
Scaffold_260	Ppup109070	Ppup109070;A3:Scaffold_260:307038-307369:307025-307369:-	PB.8021.5	PB.8021.2,PB.8021.3,PB.8021.5,PB.8021.1
Scaffold_260	Ppup109240	Ppup109240;A3:Scaffold_260:600656-600722:600641-600722:-	PB.8034.1,PB.8034.4	PB.8034.3,PB.8034.2,PB.8034.1,PB.8034.4
Scaffold_261	Ppup148040	Ppup148040;A3:Scaffold_261:196356-238095:196356-238101:+	MSTRG.6166.2	MSTRG.6166.3,MSTRG.6166.2
Scaffold_267	Ppup136130	Ppup136130;A3:Scaffold_267:419306-419586:419286-419586:-	PB.8074.4	PB.8074.7,PB.8074.2,PB.8074.1,PB.8074.4,PB.8074.8
Scaffold_26870	Ppup158210	Ppup158210;A3:Scaffold_26870:26763-26853:26763-27050:+	PB.8585.2	PB.8585.7,PB.8585.5,PB.8585.3,PB.8585.6,PB.8585.11,PB.8585.2
Scaffold_269	Ppup099490	Ppup099490;A3:Scaffold_269:139397-139483:139205-139483:-	PB.8089.2,PB.8089.5	PB.8089.5,PB.8089.1,PB.8089.2
Scaffold_269	Ppup099520_Ppup099570_Ppup099560	Ppup099520_Ppup099570_Ppup099560;A3:Scaffold_269:199977-203116:199959-203116:-	PB.8091.1	PB.8091.1,PB.8091.2
Scaffold_27	Ppup052390	Ppup052390;A3:Scaffold_27:300776-302196:300776-302212:+	PB.5317.33	PB.5317.33,PB.5317.34
Scaffold_27	Ppup052490	Ppup052490;A3:Scaffold_27:378539-380021:378539-380024:+	PB.5324.3,PB.5324.4	PB.5324.3,PB.5324.1,PB.5324.4
Scaffold_27	Ppup052740	Ppup052740;A3:Scaffold_27:725468-730986:725468-731084:+	PB.5347.5	PB.5347.6,PB.5347.9,PB.5347.8,PB.5347.4,PB.5347.5,PB.5347.7,PB.5347.11
Scaffold_27	Ppup052910	Ppup052910;A3:Scaffold_27:940530-940605:940530-940609:+	MSTRG.6314.2	MSTRG.6314.2,MSTRG.6314.1
Scaffold_27	Ppup053310	Ppup053310;A3:Scaffold_27:1960804-1962084:1960804-1962087:+	PB.5388.1,PB.5388.11,PB.5388.8,PB.5388.7,PB.5388.9,PB.5388.6,PB.5388.14,PB.5388.13,PB.5388.16,PB.5388.12	PB.5388.16,PB.5388.13,PB.5388.9,PB.5388.14,PB.5388.8,PB.5388.12,PB.5388.10,PB.5388.6,PB.5388.7,PB.5388.11,PB.5388.1
Scaffold_27	Ppup053750	Ppup053750;A3:Scaffold_27:2553663-2553901:2553663-2553946:+	PB.5413.2,PB.5413.3	PB.5413.3,PB.5413.2,PB.5413.1
Scaffold_27	Ppup053810	Ppup053810;A3:Scaffold_27:2656443-2656518:2656443-2656988:+	PB.5419.5	PB.5419.3,PB.5419.1,PB.5419.11,PB.5419.5,PB.5419.7,PB.5419.4,PB.5419.2
Scaffold_27	Ppup053810	Ppup053810;A3:Scaffold_27:2662186-2662638:2662186-2663529:+	PB.5419.6,PB.5419.14	PB.5419.3,PB.5419.14,PB.5419.1,PB.5419.6,PB.5419.12,PB.5419.11,PB.5419.7
Scaffold_27	Ppup053810	Ppup053810;A3:Scaffold_27:2658980-2659322:2658980-2660650:+	PB.5419.12	PB.5419.7,PB.5419.12,PB.5419.11
Scaffold_27	Ppup053830	Ppup053830;A3:Scaffold_27:2675834-2676367:2675834-2676409:+	PB.5421.2,PB.5421.7	PB.5421.7,PB.5421.3,PB.5421.2
Scaffold_27	Ppup053830	Ppup053830;A3:Scaffold_27:2675834-2676325:2675834-2676367:+	PB.5421.1,PB.5421.5	PB.5421.5,PB.5421.7,PB.5421.2,PB.5421.1
Scaffold_27	Ppup053830	Ppup053830;A3:Scaffold_27:2675834-2676325:2675834-2676409:+	PB.5421.1,PB.5421.5	PB.5421.5,PB.5421.3,PB.5421.1
Scaffold_27	Ppup054020	Ppup054020;A3:Scaffold_27:2985550-2985813:2985550-2985836:+	PB.5436.8,PB.5436.7,PB.5436.12,PB.5436.15	PB.5436.7,PB.5436.4,PB.5436.24,PB.5436.1,PB.5436.12,PB.5436.5,PB.5436.17,PB.5436.8,PB.5436.13,PB.5436.21,PB.5436.10,PB.5436.15,PB.5436.16,PB.5436.19,PB.5436.11,PB.5436.2,PB.5436.23
Scaffold_27	Ppup054360	Ppup054360;A3:Scaffold_27:3275163-3277052:3275163-3278172:+	PB.5462.2	PB.5462.2,PB.5462.3
Scaffold_27	Ppup054470	Ppup054470;A3:Scaffold_27:3413271-3413348:3413271-3413365:+	PB.5472.1	PB.5472.1,PB.5472.2
Scaffold_27	Ppup054560	Ppup054560;A3:Scaffold_27:3442315-3442393:3442315-3442417:+	PB.5478.4,PB.5478.1,PB.5478.2,PB.5478.3	PB.5478.1,PB.5478.3,PB.5478.2,PB.5478.5,PB.5478.4
Scaffold_27	Ppup052820	Ppup052820;A3:Scaffold_27:814594-821565:814590-821565:-	PB.5355.2	PB.5355.4,PB.5355.2
Scaffold_27	Ppup053150	Ppup053150;A3:Scaffold_27:1705263-1705552:1704911-1705552:-	PB.5378.12	PB.5378.6,PB.5378.9,PB.5378.3,PB.5378.12,PB.5378.7,PB.5378.4
Scaffold_27	Ppup053250	Ppup053250;A3:Scaffold_27:1831232-1831310:1831211-1831310:-	MSTRG.6341.1	MSTRG.6341.2,MSTRG.6341.1
Scaffold_27	Ppup053430	Ppup053430;A3:Scaffold_27:2025368-2027407:2025364-2027407:-	PB.5394.13	PB.5394.13,PB.5394.19
Scaffold_27	Ppup053760	Ppup053760;A3:Scaffold_27:2568101-2569429:2568044-2569429:-	PB.5414.1,PB.5414.4	PB.5414.1,PB.5414.2,PB.5414.4
Scaffold_27	Ppup053760	Ppup053760;A3:Scaffold_27:2568101-2569429:2568047-2569429:-	PB.5414.1,PB.5414.4	PB.5414.3,PB.5414.1,PB.5414.4
Scaffold_27	Ppup053760	Ppup053760;A3:Scaffold_27:2568047-2569429:2568044-2569429:-	PB.5414.3	PB.5414.3,PB.5414.2
Scaffold_27	Ppup054060	Ppup054060;A3:Scaffold_27:3034770-3035722:3034749-3035722:-	PB.5440.1	PB.5440.4,PB.5440.1
Scaffold_27	Ppup054380	Ppup054380;A3:Scaffold_27:3282739-3282823:3282722-3282823:-	PB.5463.1,PB.5463.3,PB.5463.7	PB.5463.3,PB.5463.4,PB.5463.1,PB.5463.7
Scaffold_27	Ppup054530	Ppup054530;A3:Scaffold_27:3433820-3433919:3433763-3433919:-	PB.5476.2	PB.5476.3,PB.5476.5,PB.5476.2
Scaffold_272	Ppup032990	Ppup032990;A3:Scaffold_272:29054-29200:29054-29221:+	PB.8092.1,PB.8092.2	PB.8092.1,PB.8092.3,PB.8092.4,PB.8092.2
Scaffold_272	Ppup033270	Ppup033270;A3:Scaffold_272:281607-282142:281607-282151:+	PB.8115.8	PB.8115.4,PB.8115.8,PB.8115.5
Scaffold_272	Ppup033360	Ppup033360;A3:Scaffold_272:343501-351891:343501-351945:+	PB.8122.1,PB.8122.2,PB.8122.3,PB.8122.7	PB.8122.3,PB.8122.4,PB.8122.5,PB.8122.7,PB.8122.1,PB.8122.2
Scaffold_272	Ppup033110	Ppup033110;A3:Scaffold_272:151756-151843:151723-151843:-	PB.8102.2	PB.8102.1,PB.8102.4,PB.8102.2
Scaffold_272	Ppup033160	Ppup033160;A3:Scaffold_272:180344-180992:180322-180992:-	PB.8108.5	PB.8108.4,PB.8108.1,PB.8108.5
Scaffold_272	Ppup033420	Ppup033420;A3:Scaffold_272:393969-394349:393807-394349:-	PB.8127.2,PB.8127.1,PB.8127.4,PB.8127.5,PB.8127.3,PB.8127.10,PB.8127.11	PB.8127.4,PB.8127.11,PB.8127.2,PB.8127.1,PB.8127.3,PB.8127.6,PB.8127.10,PB.8127.9,PB.8127.5
Scaffold_272	Ppup033450	Ppup033450;A3:Scaffold_272:410010-410080:409995-410080:-	PB.8132.1	PB.8132.2,PB.8132.1
Scaffold_272	Ppup033530	Ppup033530;A3:Scaffold_272:445235-446400:445232-446400:-	PB.8135.7	PB.8135.7,PB.8135.13,PB.8135.3,PB.8135.4,PB.8135.11,PB.8135.9
Scaffold_274	Ppup152710	Ppup152710;A3:Scaffold_274:79188-79245:79166-79245:-	PB.8148.2	PB.8148.2,PB.8148.3
Scaffold_274	Ppup152750	Ppup152750;A3:Scaffold_274:102167-103827:102167-103829:+	PB.8151.1	PB.8151.1,PB.8151.6
Scaffold_274	Ppup152870	Ppup152870;A3:Scaffold_274:301019-302657:301019-302668:+	PB.8158.15,PB.8158.16,PB.8158.17	PB.8158.17,PB.8158.1,PB.8158.3,PB.8158.9,PB.8158.18,PB.8158.19,PB.8158.15,PB.8158.16,PB.8158.8,PB.8158.13,PB.8158.10
Scaffold_274	Ppup153070	Ppup153070;A3:Scaffold_274:384314-384642:384314-384739:+	PB.8168.21	PB.8168.11,PB.8168.18,PB.8168.17,PB.8168.19,PB.8168.21,PB.8168.22,PB.8168.16,PB.8168.8,PB.8168.3,PB.8168.1,PB.8168.23,PB.8168.14,PB.8168.9,PB.8168.20,PB.8168.2,PB.8168.15,PB.8168.12,PB.8168.10,PB.8168.13
Scaffold_28	Ppup017480	Ppup017480;A3:Scaffold_28:106267-106343:106255-106343:-	PB.5495.3,PB.5495.1,PB.5495.2,PB.5495.19,PB.5495.21,PB.5495.14,PB.5495.12,PB.5495.18,PB.5495.25	PB.5495.10,PB.5495.2,PB.5495.11,PB.5495.14,PB.5495.15,PB.5495.1,PB.5495.21,PB.5495.12,PB.5495.3,PB.5495.18,PB.5495.19,PB.5495.25
Scaffold_28	Ppup017480	Ppup017480;A3:Scaffold_28:102507-102598:102465-102598:-	PB.5495.2,PB.5495.14,PB.5495.10	PB.5495.10,PB.5495.2,PB.5495.11,PB.5495.14,PB.5495.15,PB.5495.1,PB.5495.21,PB.5495.12,PB.5495.3,PB.5495.18,PB.5495.19
Scaffold_28	Ppup017870	Ppup017870;A3:Scaffold_28:1039471-1039999:1039459-1039999:-	PB.5517.3	PB.5517.1,PB.5517.3
Scaffold_28	Ppup018600	Ppup018600;A3:Scaffold_28:1644919-1645070:1644916-1645070:-	PB.5567.5,PB.5567.8,PB.5567.14	PB.5567.12,PB.5567.4,PB.5567.3,PB.5567.8,PB.5567.13,PB.5567.2,PB.5567.5,PB.5567.14,PB.5567.15,PB.5567.7,PB.5567.6
Scaffold_28	Ppup018610	Ppup018610;A3:Scaffold_28:1649409-1649496:1649406-1649496:-	PB.5568.1	PB.5568.5,PB.5568.2,PB.5568.1,PB.5568.6
Scaffold_28	Ppup018630	Ppup018630;A3:Scaffold_28:1703546-1703660:1703528-1703660:-	PB.5569.2,PB.5569.5,PB.5569.7	PB.5569.2,PB.5569.8,PB.5569.1,PB.5569.5,PB.5569.3,PB.5569.4,PB.5569.7
Scaffold_28	Ppup018650	Ppup018650;A3:Scaffold_28:1711359-1711438:1711342-1711438:-	PB.5571.13	PB.5571.10,PB.5571.14,PB.5571.6,PB.5571.16,PB.5571.3,PB.5571.19,PB.5571.9,PB.5571.12,PB.5571.4,PB.5571.13,PB.5571.5
Scaffold_28	Ppup018650	Ppup018650;A3:Scaffold_28:1712221-1712319:1712196-1712319:-	PB.5571.16	PB.5571.10,PB.5571.14,PB.5571.16,PB.5571.2,PB.5571.19,PB.5571.4,PB.5571.13,PB.5571.5
Scaffold_28	Ppup018680	Ppup018680;A3:Scaffold_28:1725915-1725990:1725898-1725990:-	PB.5574.2	PB.5574.2,PB.5574.1
Scaffold_28	Ppup018760	Ppup018760;A3:Scaffold_28:1778193-1779342:1778175-1779342:-	PB.5582.12,PB.5582.14	PB.5582.12,PB.5582.14,PB.5582.16,PB.5582.15,PB.5582.20,PB.5582.4,PB.5582.9,PB.5582.13,PB.5582.26,PB.5582.31
Scaffold_28	Ppup018860	Ppup018860;A3:Scaffold_28:1985160-1985238:1985154-1985238:-	PB.5591.2,PB.5591.9,PB.5591.10	PB.5591.9,PB.5591.2,PB.5591.13,PB.5591.10
Scaffold_28	Ppup018860	Ppup018860;A3:Scaffold_28:1988356-1988591:1988341-1988591:-	PB.5591.9	PB.5591.9,PB.5591.2,PB.5591.10
Scaffold_28	novelGenePB.5600	novelGenePB.5600;A3:Scaffold_28:2120830-2121360:2120827-2121360:-	PB.5600.2	PB.5600.2,PB.5600.4
Scaffold_28	novelGenePB.5600	novelGenePB.5600;A3:Scaffold_28:2120831-2121360:2120830-2121360:-	PB.5600.3,PB.5600.5	PB.5600.2,PB.5600.5,PB.5600.3
Scaffold_28	novelGenePB.5600	novelGenePB.5600;A3:Scaffold_28:2120831-2121360:2120827-2121360:-	PB.5600.3,PB.5600.5	PB.5600.4,PB.5600.5,PB.5600.3
Scaffold_28	Ppup017390	Ppup017390;A3:Scaffold_28:74653-74737:74653-74740:+	PB.5487.1,PB.5487.2,PB.5487.3,PB.5487.7,PB.5487.11,PB.5487.13,PB.5487.4,PB.5487.9	PB.5487.3,PB.5487.11,PB.5487.4,PB.5487.2,PB.5487.9,PB.5487.1,PB.5487.7,PB.5487.13,PB.5487.6
Scaffold_28	Ppup017690	Ppup017690;A3:Scaffold_28:220643-220709:220643-220822:+	PB.5508.2,PB.5508.7	PB.5508.6,PB.5508.7,PB.5508.2,PB.5508.3
Scaffold_28	Ppup017700	Ppup017700;A3:Scaffold_28:241555-243740:241555-244034:+	PB.5509.3	PB.5509.14,PB.5509.1,PB.5509.12,PB.5509.2,PB.5509.15,PB.5509.11,PB.5509.4,PB.5509.3
Scaffold_28	Ppup017950	Ppup017950;A3:Scaffold_28:1152317-1152397:1152317-1152409:+	PB.5523.15,PB.5523.9,PB.5523.10,PB.5523.12,PB.5523.3,PB.5523.6,PB.5523.7,PB.5523.16,PB.5523.17,PB.5523.18,PB.5523.19,PB.5523.20,PB.5523.21,PB.5523.24,PB.5523.25	PB.5523.9,PB.5523.10,PB.5523.7,PB.5523.22,PB.5523.5,PB.5523.16,PB.5523.26,PB.5523.15,PB.5523.25,PB.5523.14,PB.5523.17,PB.5523.20,PB.5523.19,PB.5523.37,PB.5523.1,PB.5523.21,PB.5523.3,PB.5523.18,PB.5523.12,PB.5523.24,PB.5523.6,PB.5523.23
Scaffold_28	Ppup017950	Ppup017950;A3:Scaffold_28:1152882-1152957:1152882-1152960:+	PB.5523.5,PB.5523.10,PB.5523.1,PB.5523.12,PB.5523.6,PB.5523.7,PB.5523.16,PB.5523.17,PB.5523.26,PB.5523.18,PB.5523.19,PB.5523.20,PB.5523.21,PB.5523.22,PB.5523.23,PB.5523.24,PB.5523.37	PB.5523.9,PB.5523.10,PB.5523.7,PB.5523.22,PB.5523.5,PB.5523.16,PB.5523.26,PB.5523.15,PB.5523.25,PB.5523.14,PB.5523.17,PB.5523.20,PB.5523.19,PB.5523.37,PB.5523.1,PB.5523.21,PB.5523.18,PB.5523.3,PB.5523.12,PB.5523.24,PB.5523.6,PB.5523.23
Scaffold_28	Ppup017950	Ppup017950;A3:Scaffold_28:1151414-1151684:1151414-1151714:+	PB.5523.9,PB.5523.10,PB.5523.1,PB.5523.3,PB.5523.17,PB.5523.21,PB.5523.22	PB.5523.9,PB.5523.10,PB.5523.7,PB.5523.22,PB.5523.5,PB.5523.16,PB.5523.15,PB.5523.25,PB.5523.14,PB.5523.17,PB.5523.19,PB.5523.37,PB.5523.1,PB.5523.21,PB.5523.3,PB.5523.18,PB.5523.24,PB.5523.6,PB.5523.23
Scaffold_28	Ppup018140	Ppup018140;A3:Scaffold_28:1233846-1234623:1233846-1235885:+	PB.5538.14	PB.5538.14,PB.5538.15,PB.5538.18,PB.5538.17,PB.5538.16,PB.5538.11
Scaffold_28	Ppup018550	Ppup018550;A3:Scaffold_28:1557823-1557950:1557823-1557962:+	PB.5562.1	PB.5562.6,PB.5562.1
Scaffold_28	Ppup018590	Ppup018590;A3:Scaffold_28:1621629-1621860:1621629-1621872:+	MSTRG.6680.2,MSTRG.6680.5	MSTRG.6680.3,MSTRG.6680.2,MSTRG.6680.5,MSTRG.6680.1
Scaffold_28	Ppup018780	Ppup018780;A3:Scaffold_28:1808482-1809002:1808482-1809020:+	PB.5584.1	PB.5584.2,PB.5584.1
Scaffold_28	Ppup019100	Ppup019100;A3:Scaffold_28:2191013-2191075:2191013-2191102:+	PB.5610.4	PB.5610.2,PB.5610.1,PB.5610.5,PB.5610.4
Scaffold_285	Ppup099800	Ppup099800;A3:Scaffold_285:342212-342592:342142-342592:-	PB.8201.15	PB.8201.6,PB.8201.15
Scaffold_285	Ppup099850	Ppup099850;A3:Scaffold_285:366516-366875:366475-366875:-	PB.8205.12,PB.8205.15	PB.8205.13,PB.8205.15,PB.8205.12
Scaffold_285	Ppup099860	Ppup099860;A3:Scaffold_285:416929-454990:416920-454990:-	MSTRG.6793.1	MSTRG.6793.2,MSTRG.6793.1
Scaffold_292	Ppup153590	Ppup153590;A3:Scaffold_292:318777-318857:318774-318857:-	PB.8216.4,PB.8216.7,PB.8216.3,PB.8216.10	PB.8216.3,PB.8216.7,PB.8216.11,PB.8216.10,PB.8216.4
Scaffold_3	Ppup121910	Ppup121910;A3:Scaffold_3:18725-18792:18725-18798:+	PB.1287.2	PB.1287.2,PB.1287.1
Scaffold_3	Ppup122120	Ppup122120;A3:Scaffold_3:347063-347202:347063-347204:+	PB.1306.7,PB.1306.9	PB.1306.1,PB.1306.12,PB.1306.10,PB.1306.8,PB.1306.9,PB.1306.7,PB.1306.13,PB.1306.15
Scaffold_3	Ppup122270	Ppup122270;A3:Scaffold_3:488971-489422:488971-489424:+	PB.1315.7	PB.1315.5,PB.1315.3,PB.1315.4,PB.1315.1,PB.1315.7,PB.1315.2
Scaffold_3	Ppup122550	Ppup122550;A3:Scaffold_3:748498-748626:748498-748635:+	PB.1330.2	PB.1330.1,PB.1330.2
Scaffold_3	Ppup122670	Ppup122670;A3:Scaffold_3:927109-927607:927109-927672:+	PB.1336.1,PB.1336.7	PB.1336.7,PB.1336.4,PB.1336.1
Scaffold_3	Ppup122880	Ppup122880;A3:Scaffold_3:1101478-1101536:1101478-1101554:+	PB.1346.7	PB.1346.2,PB.1346.1,PB.1346.3,PB.1346.5,PB.1346.7,PB.1346.4
Scaffold_3	Ppup122940	Ppup122940;A3:Scaffold_3:1272282-1273348:1272282-1273364:+	PB.1349.3	PB.1349.3,PB.1349.2
Scaffold_3	Ppup123010	Ppup123010;A3:Scaffold_3:1538023-1538121:1538023-1538126:+	PB.1351.1,PB.1351.2,PB.1351.4	PB.1351.4,PB.1351.1,PB.1351.2,PB.1351.3
Scaffold_3	Ppup123120	Ppup123120;A3:Scaffold_3:1573488-1573677:1573488-1574024:+	PB.1355.3,PB.1355.1	PB.1355.1,PB.1355.4,PB.1355.3,PB.1355.2
Scaffold_3	Ppup123260	Ppup123260;A3:Scaffold_3:1921528-1923507:1921528-1923525:+	PB.1361.3,PB.1361.5	PB.1361.6,PB.1361.2,PB.1361.1,PB.1361.11,PB.1361.10,PB.1361.12,PB.1361.3,PB.1361.5,PB.1361.9
Scaffold_3	Ppup123340	Ppup123340;A3:Scaffold_3:2040073-2040423:2040073-2040438:+	PB.1365.5,PB.1365.14,PB.1365.17	PB.1365.17,PB.1365.7,PB.1365.15,PB.1365.1,PB.1365.14,PB.1365.20,PB.1365.18,PB.1365.5,PB.1365.10,PB.1365.21
Scaffold_3	Ppup123420	Ppup123420;A3:Scaffold_3:2260817-2261024:2260817-2261029:+	PB.1369.2,PB.1369.3	PB.1369.2,PB.1369.3,PB.1369.1
Scaffold_3	Ppup123420	Ppup123420;A3:Scaffold_3:2262988-2263694:2262988-2263759:+	PB.1369.3	PB.1369.3,PB.1369.1
Scaffold_3	Ppup123810	Ppup123810;A3:Scaffold_3:2648269-2649124:2648269-2649127:+	PB.1385.1	PB.1385.2,PB.1385.1
Scaffold_3	Ppup123810	Ppup123810;A3:Scaffold_3:2655590-2655682:2655590-2655695:+	PB.1385.8	PB.1385.3,PB.1385.2,PB.1385.1,PB.1385.8
Scaffold_3	Ppup123820	Ppup123820;A3:Scaffold_3:2663368-2663447:2663368-2663453:+	PB.1386.7,PB.1386.12	PB.1386.7,PB.1386.12,PB.1386.11
Scaffold_3	Ppup124100	Ppup124100;A3:Scaffold_3:2845164-2845383:2845164-2846427:+	PB.1408.4	PB.1408.1,PB.1408.4
Scaffold_3	Ppup124190	Ppup124190;A3:Scaffold_3:2895713-2896241:2895713-2896375:+	PB.1416.4	PB.1416.4,PB.1416.5
Scaffold_3	Ppup124250	Ppup124250;A3:Scaffold_3:3007630-3007690:3007630-3007706:+	PB.1421.14	PB.1421.14,PB.1421.8,PB.1421.15,PB.1421.9,PB.1421.12,PB.1421.3,PB.1421.5,PB.1421.2,PB.1421.13,PB.1421.1,PB.1421.11,PB.1421.7,PB.1421.10
Scaffold_3	Ppup124290	Ppup124290;A3:Scaffold_3:3053327-3053403:3053327-3053427:+	PB.1424.2,PB.1424.3,PB.1424.8,PB.1424.9,PB.1424.6	PB.1424.4,PB.1424.7,PB.1424.8,PB.1424.3,PB.1424.9,PB.1424.1,PB.1424.2,PB.1424.5,PB.1424.6
Scaffold_3	Ppup124590	Ppup124590;A3:Scaffold_3:3504851-3505045:3504851-3505066:+	PB.1446.2	PB.1446.2,PB.1446.5
Scaffold_3	Ppup125320	Ppup125320;A3:Scaffold_3:4549785-4549955:4549785-4550027:+	MSTRG.7159.1,MSTRG.7159.2	MSTRG.7159.4,MSTRG.7159.2,MSTRG.7159.1
Scaffold_3	Ppup125730	Ppup125730;A3:Scaffold_3:4792960-4794901:4792960-4795049:+	PB.1551.3	PB.1551.7,PB.1551.2,PB.1551.3
Scaffold_3	Ppup125860	Ppup125860;A3:Scaffold_3:4872533-4873012:4872533-4874158:+	PB.1561.15,PB.1561.19	PB.1561.19,PB.1561.15,PB.1561.20
Scaffold_3	Ppup126030	Ppup126030;A3:Scaffold_3:4986472-4986675:4986472-4986735:+	PB.1574.1,PB.1574.3,PB.1574.4	PB.1574.3,PB.1574.5,PB.1574.4,PB.1574.1,PB.1574.2
Scaffold_3	Ppup126550	Ppup126550;A3:Scaffold_3:6030370-6030447:6030370-6030459:+	PB.1605.1,PB.1605.5,PB.1605.4	PB.1605.8,PB.1605.4,PB.1605.5,PB.1605.1
Scaffold_3	Ppup126930	Ppup126930;A3:Scaffold_3:6335278-6335362:6335278-6335388:+	PB.1634.8	PB.1634.11,PB.1634.2,PB.1634.8,PB.1634.9,PB.1634.15
Scaffold_3	Ppup127000	Ppup127000;A3:Scaffold_3:6389430-6389584:6389430-6389602:+	PB.1639.2,PB.1639.6,PB.1639.7	PB.1639.3,PB.1639.4,PB.1639.2,PB.1639.11,PB.1639.6,PB.1639.7,PB.1639.8,PB.1639.9
Scaffold_3	Ppup127010	Ppup127010;A3:Scaffold_3:6401049-6401150:6401049-6401153:+	MSTRG.7301.1,MSTRG.7301.2	MSTRG.7301.1,MSTRG.7301.3,MSTRG.7301.2
Scaffold_3	Ppup127150	Ppup127150;A3:Scaffold_3:6524453-6524528:6524453-6524545:+	MSTRG.7310.1	MSTRG.7310.1,MSTRG.7310.2
Scaffold_3	Ppup127190	Ppup127190;A3:Scaffold_3:6598183-6598279:6598183-6598329:+	PB.1648.2	PB.1648.1,PB.1648.5,PB.1648.4,PB.1648.2
Scaffold_3	Ppup127340	Ppup127340;A3:Scaffold_3:6713415-6713642:6713415-6713645:+	PB.1661.1,PB.1661.10,PB.1661.9,PB.1661.4,PB.1661.5,PB.1661.8,PB.1661.11,PB.1661.12,PB.1661.14,PB.1661.6,PB.1661.7,PB.1661.15,PB.1661.16,PB.1661.18	PB.1661.4,PB.1661.1,PB.1661.18,PB.1661.9,PB.1661.11,PB.1661.5,PB.1661.10,PB.1661.6,PB.1661.7,PB.1661.16,PB.1661.8,PB.1661.14,PB.1661.17,PB.1661.12,PB.1661.15
Scaffold_3	Ppup127340	Ppup127340;A3:Scaffold_3:6714691-6714753:6714691-6714783:+	PB.1661.4,PB.1661.11,PB.1661.6,PB.1661.15	PB.1661.4,PB.1661.1,PB.1661.18,PB.1661.11,PB.1661.9,PB.1661.5,PB.1661.6,PB.1661.10,PB.1661.7,PB.1661.16,PB.1661.8,PB.1661.14,PB.1661.17,PB.1661.12,PB.1661.15
Scaffold_3	Ppup127840	Ppup127840;A3:Scaffold_3:7795742-7795930:7795742-7795963:+	PB.1687.3	PB.1687.1,PB.1687.3
Scaffold_3	Ppup127980	Ppup127980;A3:Scaffold_3:7846016-7846260:7846016-7847666:+	PB.1691.2	PB.1691.2,PB.1691.7
Scaffold_3	Ppup127980	Ppup127980;A3:Scaffold_3:7846419-7847092:7846419-7847666:+	PB.1691.4	PB.1691.4,PB.1691.6
Scaffold_3	Ppup122010	Ppup122010;A3:Scaffold_3:170563-170612:170542-170612:-	PB.1298.3	PB.1298.1,PB.1298.2,PB.1298.3
Scaffold_3	Ppup122040	Ppup122040;A3:Scaffold_3:184153-186065:183712-186065:-	PB.1301.1	PB.1301.2,PB.1301.1,PB.1301.3,PB.1301.5
Scaffold_3	Ppup122040	Ppup122040;A3:Scaffold_3:187382-189381:187379-189381:-	PB.1301.9	PB.1301.2,PB.1301.5,PB.1301.8,PB.1301.13,PB.1301.9,PB.1301.6,PB.1301.1,PB.1301.3,PB.1301.10,PB.1301.12
Scaffold_3	Ppup122300	Ppup122300;A3:Scaffold_3:497355-497440:497352-497440:-	PB.1318.1	PB.1318.1,PB.1318.2
Scaffold_3	Ppup122320	Ppup122320;A3:Scaffold_3:515263-517246:515218-517246:-	PB.1376.10	PB.1376.10,PB.1376.1,PB.1376.11,PB.1376.9
Scaffold_3	Ppup122470	Ppup122470;A3:Scaffold_3:641345-643000:638680-643000:-	PB.1376.25,PB.1376.39,PB.1376.31	PB.1376.39,PB.1376.31,PB.1376.27,PB.1376.25
Scaffold_3	Ppup122610	Ppup122610;A3:Scaffold_3:777047-778027:776988-778027:-	MSTRG.6910.1	MSTRG.6910.2,MSTRG.6910.1
Scaffold_3	Ppup122620	Ppup122620;A3:Scaffold_3:786349-787783:786348-787783:-	PB.1376.75	PB.1376.74,PB.1376.77,PB.1376.75
Scaffold_3	Ppup123000	Ppup123000;A3:Scaffold_3:1533131-1533601:1533128-1533601:-	MSTRG.6949.1	MSTRG.6949.1,MSTRG.6949.2
Scaffold_3	Ppup123130	Ppup123130;A3:Scaffold_3:1630941-1631014:1630924-1631014:-	PB.1376.162	PB.1376.161,PB.1376.162
Scaffold_3	Ppup123200	Ppup123200;A3:Scaffold_3:1880231-1880299:1880228-1880299:-	PB.1376.201	PB.1376.204,PB.1376.199,PB.1376.201,PB.1376.200
Scaffold_3	Ppup123560	Ppup123560;A3:Scaffold_3:2333236-2333336:2333233-2333336:-	MSTRG.7000.1	MSTRG.7000.2,MSTRG.7000.1
Scaffold_3	Ppup123940	Ppup123940;A3:Scaffold_3:2740549-2740749:2740510-2740749:-	PB.1393.10,PB.1393.8	PB.1393.10,PB.1393.5,PB.1393.8,PB.1393.6,PB.1393.7
Scaffold_3	Ppup123940	Ppup123940;A3:Scaffold_3:2738288-2738611:2738195-2738611:-	PB.1393.7	PB.1393.7,PB.1393.5,PB.1393.10
Scaffold_3	Ppup123940	Ppup123940;A3:Scaffold_3:2741924-2742006:2741912-2742006:-	PB.1393.5,PB.1393.6,PB.1393.8,PB.1393.22,PB.1393.12,PB.1393.14,PB.1393.15,PB.1393.16,PB.1393.17,PB.1393.18,PB.1393.19,PB.1393.20	PB.1393.17,PB.1393.20,PB.1393.14,PB.1393.16,PB.1393.19,PB.1393.8,PB.1393.22,PB.1393.5,PB.1393.12,PB.1393.18,PB.1393.6,PB.1393.15,PB.1393.21
Scaffold_3	Ppup123940	Ppup123940;A3:Scaffold_3:2742206-2742509:2742197-2742509:-	PB.1393.5	PB.1393.20,PB.1393.16,PB.1393.19,PB.1393.8,PB.1393.22,PB.1393.5,PB.1393.12,PB.1393.21,PB.1393.6,PB.1393.15
Scaffold_3	Ppup123940	Ppup123940;A3:Scaffold_3:2745195-2745495:2745189-2745495:-	PB.1393.5,PB.1393.6,PB.1393.8,PB.1393.12,PB.1393.13,PB.1393.14,PB.1393.15,PB.1393.16,PB.1393.17,PB.1393.18,PB.1393.19,PB.1393.20,PB.1393.21	PB.1393.17,PB.1393.20,PB.1393.14,PB.1393.16,PB.1393.19,PB.1393.13,PB.1393.8,PB.1393.5,PB.1393.12,PB.1393.18,PB.1393.6,PB.1393.15,PB.1393.21,PB.1393.22
Scaffold_3	Ppup123940	Ppup123940;A3:Scaffold_3:2745702-2745976:2745671-2745976:-	PB.1393.5,PB.1393.6,PB.1393.8,PB.1393.12,PB.1393.13,PB.1393.14,PB.1393.15,PB.1393.17,PB.1393.18,PB.1393.19,PB.1393.20,PB.1393.21	PB.1393.17,PB.1393.20,PB.1393.14,PB.1393.16,PB.1393.19,PB.1393.13,PB.1393.8,PB.1393.5,PB.1393.12,PB.1393.18,PB.1393.6,PB.1393.15,PB.1393.21
Scaffold_3	Ppup123940	Ppup123940;A3:Scaffold_3:2743972-2744395:2742649-2744395:-	PB.1393.17	PB.1393.17,PB.1393.12,PB.1393.22,PB.1393.5,PB.1393.8,PB.1393.21,PB.1393.6
Scaffold_3	Ppup124580	Ppup124580;A3:Scaffold_3:3496545-3496682:3496515-3496682:-	PB.1445.1,PB.1445.2	PB.1445.1,PB.1445.4,PB.1445.2
Scaffold_3	Ppup124640	Ppup124640;A3:Scaffold_3:3531923-3532049:3531920-3532049:-	MSTRG.7086.2,MSTRG.7086.3	MSTRG.7086.3,MSTRG.7086.2,MSTRG.7086.1
Scaffold_3	Ppup124830	Ppup124830;A3:Scaffold_3:3859717-3859795:3859625-3859795:-	PB.1468.17	PB.1468.17,PB.1468.3
Scaffold_3	Ppup125650	Ppup125650;A3:Scaffold_3:4727938-4728011:4727809-4728011:-	PB.1541.1,PB.1541.2,PB.1541.4,PB.1541.5,PB.1541.6	PB.1541.2,PB.1541.3,PB.1541.6,PB.1541.4,PB.1541.1,PB.1541.5
Scaffold_3	Ppup126110	Ppup126110;A3:Scaffold_3:5032848-5036187:5032846-5036187:-	PB.1578.2	PB.1578.4,PB.1578.1,PB.1578.2
Scaffold_3	Ppup126110	Ppup126110;A3:Scaffold_3:5037713-5043599:5037674-5043599:-	PB.1578.2	PB.1578.4,PB.1578.1,PB.1578.2
Scaffold_3	Ppup126110	Ppup126110;A3:Scaffold_3:5029258-5030839:5029244-5030839:-	PB.1578.4	PB.1578.1,PB.1578.4,PB.1578.2
Scaffold_3	Ppup126130	Ppup126130;A3:Scaffold_3:5111530-5111624:5111516-5111624:-	PB.1580.12,PB.1580.4,PB.1580.18,PB.1580.26,PB.1580.27	PB.1580.13,PB.1580.19,PB.1580.4,PB.1580.12,PB.1580.1,PB.1580.9,PB.1580.31,PB.1580.29,PB.1580.18,PB.1580.27,PB.1580.26
Scaffold_3	Ppup126130	Ppup126130;A3:Scaffold_3:5116464-5116538:5115943-5116538:-	PB.1580.13	PB.1580.13,PB.1580.4,PB.1580.9,PB.1580.1,PB.1580.29,PB.1580.7,PB.1580.28,PB.1580.26
Scaffold_3	Ppup126560	Ppup126560;A3:Scaffold_3:6040452-6040648:6040447-6040648:-	PB.1606.1,PB.1606.9,PB.1606.2,PB.1606.3,PB.1606.8,PB.1606.11,PB.1606.10,PB.1606.13,PB.1606.12,PB.1606.17,PB.1606.19,PB.1606.18,PB.1606.23,PB.1606.25,PB.1606.26	PB.1606.8,PB.1606.13,PB.1606.3,PB.1606.2,PB.1606.9,PB.1606.17,PB.1606.18,PB.1606.12,PB.1606.25,PB.1606.23,PB.1606.11,PB.1606.1,PB.1606.19,PB.1606.16,PB.1606.26,PB.1606.10
Scaffold_3	Ppup126660	Ppup126660;A3:Scaffold_3:6123445-6123529:6123429-6123529:-	PB.1613.1	PB.1613.1,PB.1613.2
Scaffold_3	Ppup127040	Ppup127040;A3:Scaffold_3:6417754-6417834:6417739-6417834:-	PB.1642.1,PB.1642.11,PB.1642.2,PB.1642.6,PB.1642.7	PB.1642.14,PB.1642.11,PB.1642.2,PB.1642.7,PB.1642.1,PB.1642.6
Scaffold_3	Ppup127040	Ppup127040;A3:Scaffold_3:6419606-6419714:6419603-6419714:-	PB.1642.11,PB.1642.14,PB.1642.7	PB.1642.14,PB.1642.2,PB.1642.7,PB.1642.11
Scaffold_3	Ppup127200	Ppup127200;A3:Scaffold_3:6600968-6601342:6600583-6601342:-	PB.1649.4	PB.1649.4,PB.1649.5
Scaffold_3	Ppup127200	Ppup127200;A3:Scaffold_3:6600968-6601342:6600595-6601342:-	PB.1649.4	PB.1649.4,PB.1649.6
Scaffold_3	Ppup127200	Ppup127200;A3:Scaffold_3:6600595-6601342:6600583-6601342:-	PB.1649.6	PB.1649.5,PB.1649.6
Scaffold_3	Ppup127660	Ppup127660;A3:Scaffold_3:7431268-7431344:7431245-7431344:-	PB.1683.10	PB.1683.10,PB.1683.15,PB.1683.1,PB.1683.7
Scaffold_3	Ppup127810	Ppup127810;A3:Scaffold_3:7707959-7730211:7707947-7730211:-	PB.1685.10,PB.1685.1,PB.1685.2,PB.1685.5,PB.1685.6,PB.1685.7,PB.1685.8,PB.1685.15	PB.1685.10,PB.1685.6,PB.1685.7,PB.1685.5,PB.1685.1,PB.1685.3,PB.1685.2,PB.1685.15,PB.1685.8
Scaffold_3	Ppup127810	Ppup127810;A3:Scaffold_3:7677877-7678025:7677841-7678025:-	PB.1685.2	PB.1685.10,PB.1685.6,PB.1685.7,PB.1685.5,PB.1685.1,PB.1685.4,PB.1685.3,PB.1685.2,PB.1685.8
Scaffold_3	Ppup127810	Ppup127810;A3:Scaffold_3:7675224-7676008:7674775-7676008:-	PB.1685.7	PB.1685.8,PB.1685.7
Scaffold_3	Ppup127830	Ppup127830;A3:Scaffold_3:7770046-7770337:7770025-7770337:-	PB.1686.4	PB.1686.4,PB.1686.1,PB.1686.2
Scaffold_30	Ppup071370	Ppup071370;A3:Scaffold_30:1731864-1733684:1731864-1733687:+	PB.5679.1,PB.5679.4	PB.5679.2,PB.5679.1,PB.5679.4
Scaffold_30	Ppup071390	Ppup071390;A3:Scaffold_30:1752854-1753104:1752854-1753125:+	PB.5680.3,PB.5680.13	PB.5680.3,PB.5680.13,PB.5680.15,PB.5680.2
Scaffold_30	Ppup070660	Ppup070660;A3:Scaffold_30:562728-562808:562700-562808:-	PB.5648.1,PB.5648.2,PB.5648.3,PB.5648.4,PB.5648.6,PB.5648.7	PB.5648.7,PB.5648.4,PB.5648.2,PB.5648.6,PB.5648.1,PB.5648.5,PB.5648.3
Scaffold_30	Ppup071010_Ppup071020	Ppup071010_Ppup071020;A3:Scaffold_30:1401561-1401663:1401551-1401663:-	PB.5659.39	PB.5659.27,PB.5659.28,PB.5659.23,PB.5659.15,PB.5659.33,PB.5659.35,PB.5659.31,PB.5659.12,PB.5659.9,PB.5659.32,PB.5659.17,PB.5659.13,PB.5659.22,PB.5659.34,PB.5659.39,PB.5659.2,PB.5659.36,PB.5659.3,PB.5659.11
Scaffold_30	Ppup071010_Ppup071020	Ppup071010_Ppup071020;A3:Scaffold_30:1401589-1401663:1401561-1401663:-	PB.5659.10,PB.5659.24	PB.5659.39,PB.5659.10,PB.5659.24
Scaffold_30	Ppup071010_Ppup071020	Ppup071010_Ppup071020;A3:Scaffold_30:1401589-1401663:1401551-1401663:-	PB.5659.10,PB.5659.24	PB.5659.27,PB.5659.28,PB.5659.11,PB.5659.23,PB.5659.15,PB.5659.33,PB.5659.35,PB.5659.31,PB.5659.12,PB.5659.9,PB.5659.32,PB.5659.24,PB.5659.10,PB.5659.17,PB.5659.22,PB.5659.34,PB.5659.2,PB.5659.36,PB.5659.3,PB.5659.13
Scaffold_30	Ppup071010_Ppup071020	Ppup071010_Ppup071020;A3:Scaffold_30:1403044-1403111:1403034-1403111:-	PB.5659.10,PB.5659.11,PB.5659.12,PB.5659.13,PB.5659.15,PB.5659.17,PB.5659.21,PB.5659.22,PB.5659.24,PB.5659.27,PB.5659.28,PB.5659.29,PB.5659.30,PB.5659.31,PB.5659.32,PB.5659.33,PB.5659.34,PB.5659.35,PB.5659.36,PB.5659.5,PB.5659.6,PB.5659.7,PB.5659.8,PB.5659.9,PB.5659.2,PB.5659.3	PB.5659.7,PB.5659.27,PB.5659.28,PB.5659.11,PB.5659.8,PB.5659.23,PB.5659.15,PB.5659.21,PB.5659.33,PB.5659.35,PB.5659.29,PB.5659.31,PB.5659.12,PB.5659.9,PB.5659.32,PB.5659.24,PB.5659.10,PB.5659.17,PB.5659.22,PB.5659.34,PB.5659.2,PB.5659.6,PB.5659.30,PB.5659.5,PB.5659.36,PB.5659.3,PB.5659.13
Scaffold_30	Ppup071010_Ppup071020	Ppup071010_Ppup071020;A3:Scaffold_30:1401415-1401484:1401380-1401484:-	PB.5659.11,PB.5659.9	PB.5659.9,PB.5659.12,PB.5659.21,PB.5659.33,PB.5659.28,PB.5659.11,PB.5659.17,PB.5659.13,PB.5659.15
Scaffold_30	Ppup071010_Ppup071020	Ppup071010_Ppup071020;A3:Scaffold_30:1403296-1403355:1403272-1403355:-	PB.5659.11,PB.5659.15,PB.5659.17,PB.5659.22,PB.5659.30,PB.5659.34,PB.5659.5	PB.5659.7,PB.5659.27,PB.5659.28,PB.5659.8,PB.5659.23,PB.5659.15,PB.5659.21,PB.5659.33,PB.5659.35,PB.5659.29,PB.5659.31,PB.5659.12,PB.5659.9,PB.5659.32,PB.5659.24,PB.5659.10,PB.5659.13,PB.5659.17,PB.5659.22,PB.5659.34,PB.5659.2,PB.5659.6,PB.5659.30,PB.5659.5,PB.5659.4,PB.5659.36,PB.5659.3,PB.5659.11
Scaffold_30	Ppup071020	Ppup071020;A3:Scaffold_30:1403296-1403355:1403272-1403355:-	PB.5659.45	PB.5659.51,PB.5659.45,PB.5659.48,PB.5659.49
Scaffold_30	Ppup071210	Ppup071210;A3:Scaffold_30:1611866-1612142:1611767-1612142:-	PB.5668.2	PB.5668.1,PB.5668.2
Scaffold_30	Ppup071410	Ppup071410;A3:Scaffold_30:1776431-1776548:1775933-1776548:-	PB.5683.4	PB.5683.3,PB.5683.4
Scaffold_31	Ppup136340_Ppup136320	Ppup136340_Ppup136320;A3:Scaffold_31:142744-143242:142744-143378:+	PB.5695.3	PB.5695.3,PB.5695.6,PB.5695.4
Scaffold_318	Ppup121540	Ppup121540;A3:Scaffold_318:357132-357212:357132-357237:+	MSTRG.7515.3	MSTRG.7515.1,MSTRG.7515.3
Scaffold_318	Ppup121650	Ppup121650;A3:Scaffold_318:509793-511038:509793-511056:+	PB.8260.4	PB.8260.4,PB.8260.5
Scaffold_318	Ppup121530	Ppup121530;A3:Scaffold_318:356166-356246:356150-356246:-	PB.8250.2	PB.8250.1,PB.8250.2
Scaffold_318	Ppup121660_Ppup121670	Ppup121660_Ppup121670;A3:Scaffold_318:515059-515265:515056-515265:-	PB.8261.12	PB.8261.1,PB.8261.11,PB.8261.3,PB.8261.7,PB.8261.12
Scaffold_33	Ppup136690_Ppup136700	Ppup136690_Ppup136700;A3:Scaffold_33:394610-395432:394610-395435:+	PB.5710.1	PB.5710.1,PB.5710.2,PB.5710.3
Scaffold_33	Ppup136740	Ppup136740;A3:Scaffold_33:544369-544469:544369-544470:+	PB.5716.1	PB.5716.5,PB.5716.6,PB.5716.1,PB.5716.2,PB.5716.4
Scaffold_33	Ppup136740	Ppup136740;A3:Scaffold_33:542178-542370:542178-542456:+	PB.5716.2	PB.5716.5,PB.5716.6,PB.5716.1,PB.5716.2,PB.5716.4
Scaffold_33	novelGenePB.5711	novelGenePB.5711;A3:Scaffold_33:407875-409659:407158-409659:-	PB.5711.25	PB.5711.25,PB.5711.7
Scaffold_33	novelGenePB.5711	novelGenePB.5711;A3:Scaffold_33:419012-419481:419009-419481:-	PB.5711.8	PB.5711.19,PB.5711.2,PB.5711.18,PB.5711.7,PB.5711.6,PB.5711.9,PB.5711.8,PB.5711.3
Scaffold_33	Ppup136900	Ppup136900;A3:Scaffold_33:993583-1006948:993508-1006948:-	PB.5722.13	PB.5722.14,PB.5722.13
Scaffold_33	Ppup136900	Ppup136900;A3:Scaffold_33:993583-1006948:993317-1006948:-	PB.5722.13	PB.5722.16,PB.5722.13
Scaffold_33	Ppup136900	Ppup136900;A3:Scaffold_33:993508-1006948:993317-1006948:-	PB.5722.14	PB.5722.16,PB.5722.14
Scaffold_33	Ppup136950	Ppup136950;A3:Scaffold_33:1175506-1175610:1175503-1175610:-	MSTRG.7590.1	MSTRG.7590.2,MSTRG.7590.1
Scaffold_35	Ppup020000	Ppup020000;A3:Scaffold_35:302606-303493:302591-303493:-	PB.5756.2	PB.5756.1,PB.5756.2
Scaffold_35	Ppup020100	Ppup020100;A3:Scaffold_35:345246-345324:345243-345324:-	PB.5763.20,PB.5763.22	PB.5763.24,PB.5763.20,PB.5763.22,PB.5763.19
Scaffold_35	Ppup020270	Ppup020270;A3:Scaffold_35:454080-454156:454068-454156:-	PB.5777.1	PB.5777.2,PB.5777.1
Scaffold_35	Ppup020500	Ppup020500;A3:Scaffold_35:1069270-1069672:1069261-1069672:-	PB.5794.1,PB.5794.4,PB.5794.7,PB.5794.3,PB.5794.2,PB.5794.5,PB.5794.6,PB.5794.15,PB.5794.16,PB.5794.17,PB.5794.10,PB.5794.12,PB.5794.14,PB.5794.24	PB.5794.10,PB.5794.24,PB.5794.11,PB.5794.14,PB.5794.2,PB.5794.16,PB.5794.1,PB.5794.15,PB.5794.18,PB.5794.4,PB.5794.6,PB.5794.5,PB.5794.17,PB.5794.12,PB.5794.29,PB.5794.13,PB.5794.3,PB.5794.7
Scaffold_35	Ppup020500	Ppup020500;A3:Scaffold_35:1069995-1071177:1069927-1071177:-	PB.5794.7,PB.5794.11,PB.5794.13,PB.5794.17	PB.5794.11,PB.5794.16,PB.5794.13,PB.5794.7,PB.5794.17
Scaffold_35	Ppup020500	Ppup020500;A3:Scaffold_35:1069995-1071887:1069927-1071887:-	PB.5794.6,PB.5794.10,PB.5794.29	PB.5794.10,PB.5794.14,PB.5794.2,PB.5794.6,PB.5794.29
Scaffold_35	Ppup020500	Ppup020500;A3:Scaffold_35:1066319-1066439:1066298-1066439:-	PB.5794.13	PB.5794.10,PB.5794.11,PB.5794.16,PB.5794.18,PB.5794.3,PB.5794.17,PB.5794.24,PB.5794.14,PB.5794.15,PB.5794.6,PB.5794.13,PB.5794.7,PB.5794.5,PB.5794.12,PB.5794.19,PB.5794.1,PB.5794.2,PB.5794.4,PB.5794.29
Scaffold_35	Ppup020590	Ppup020590;A3:Scaffold_35:1148530-1148610:1148518-1148610:-	PB.5803.1,PB.5803.3,PB.5803.4,PB.5803.5,PB.5803.9,PB.5803.10,PB.5803.11	PB.5803.5,PB.5803.6,PB.5803.2,PB.5803.9,PB.5803.1,PB.5803.3,PB.5803.7,PB.5803.10,PB.5803.4,PB.5803.11
Scaffold_35	Ppup020590	Ppup020590;A3:Scaffold_35:1148776-1148957:1148746-1148957:-	PB.5803.1,PB.5803.2,PB.5803.4,PB.5803.6,PB.5803.9,PB.5803.10,PB.5803.11	PB.5803.5,PB.5803.6,PB.5803.2,PB.5803.9,PB.5803.1,PB.5803.3,PB.5803.7,PB.5803.10,PB.5803.4,PB.5803.11
Scaffold_35	Ppup020730	Ppup020730;A3:Scaffold_35:1303139-1303242:1303136-1303242:-	PB.5816.2	PB.5816.2,PB.5816.5
Scaffold_35	Ppup021150	Ppup021150;A3:Scaffold_35:1732131-1732222:1732104-1732222:-	PB.5851.11,PB.5851.8,PB.5851.13	PB.5851.11,PB.5851.12,PB.5851.13,PB.5851.8
Scaffold_35	Ppup021150	Ppup021150;A3:Scaffold_35:1732332-1732495:1732131-1732495:-	PB.5851.5	PB.5851.9,PB.5851.5
Scaffold_35	Ppup021180	Ppup021180;A3:Scaffold_35:1742854-1742925:1742842-1742925:-	PB.5854.1,PB.5854.3	PB.5854.5,PB.5854.1,PB.5854.3
Scaffold_35	Ppup021520	Ppup021520;A3:Scaffold_35:1968281-1968378:1968266-1968378:-	MSTRG.7834.1	MSTRG.7834.1,MSTRG.7834.3
Scaffold_35	Ppup021570	Ppup021570;A3:Scaffold_35:2020018-2020124:2019974-2020124:-	PB.5889.6,PB.5889.15	PB.5889.10,PB.5889.14,PB.5889.1,PB.5889.13,PB.5889.2,PB.5889.6,PB.5889.4,PB.5889.9,PB.5889.15
Scaffold_35	Ppup021710	Ppup021710;A3:Scaffold_35:2096299-2099700:2095300-2099700:-	PB.5898.3	PB.5898.9,PB.5898.3
Scaffold_35	Ppup019690	Ppup019690;A3:Scaffold_35:67359-67439:67359-67477:+	PB.5732.3,PB.5732.2	PB.5732.1,PB.5732.3,PB.5732.2
Scaffold_35	Ppup019840	Ppup019840;A3:Scaffold_35:171213-171300:171213-171343:+	PB.5744.1	PB.5744.3,PB.5744.1,PB.5744.2
Scaffold_35	Ppup019930	Ppup019930;A3:Scaffold_35:240438-240542:240438-240545:+	PB.5751.5,PB.5751.15,PB.5751.36,PB.5751.39,PB.5751.34,PB.5751.14,PB.5751.28,PB.5751.31,PB.5751.13,PB.5751.27,PB.5751.17,PB.5751.24,PB.5751.25,PB.5751.22,PB.5751.20,PB.5751.45,PB.5751.48,PB.5751.46,PB.5751.50,PB.5751.58,PB.5751.67,PB.5751.68,PB.5751.76,PB.5751.64,PB.5751.81,PB.5751.84,PB.5751.73,PB.5751.77	PB.5751.77,PB.5751.17,PB.5751.76,PB.5751.34,PB.5751.81,PB.5751.73,PB.5751.13,PB.5751.68,PB.5751.15,PB.5751.39,PB.5751.25,PB.5751.46,PB.5751.14,PB.5751.5,PB.5751.28,PB.5751.64,PB.5751.58,PB.5751.48,PB.5751.66,PB.5751.67,PB.5751.36,PB.5751.31,PB.5751.24,PB.5751.20,PB.5751.45,PB.5751.84,PB.5751.27,PB.5751.22,PB.5751.50
Scaffold_35	Ppup019930	Ppup019930;A3:Scaffold_35:240414-240542:240414-240545:+	PB.5751.33,PB.5751.41,PB.5751.43,PB.5751.19,PB.5751.37,PB.5751.38,PB.5751.29,PB.5751.32,PB.5751.4,PB.5751.30,PB.5751.3,PB.5751.1,PB.5751.2,PB.5751.23,PB.5751.21,PB.5751.11,PB.5751.12,PB.5751.47,PB.5751.44,PB.5751.7,PB.5751.8,PB.5751.9,PB.5751.60,PB.5751.51,PB.5751.53,PB.5751.54,PB.5751.59,PB.5751.52,PB.5751.56,PB.5751.57,PB.5751.82,PB.5751.80,PB.5751.74,PB.5751.78,PB.5751.61,PB.5751.69,PB.5751.71…	PB.5751.61,PB.5751.35,PB.5751.69,PB.5751.63,PB.5751.60,PB.5751.74,PB.5751.79,PB.5751.4,PB.5751.2,PB.5751.41,PB.5751.85,PB.5751.8,PB.5751.51,PB.5751.23,PB.5751.7,PB.5751.71,PB.5751.19,PB.5751.44,PB.5751.80,PB.5751.86,PB.5751.32,PB.5751.9,PB.5751.21,PB.5751.65,PB.5751.3,PB.5751.1,PB.5751.37,PB.5751.83,PB.5751.33,PB.5751.11,PB.5751.54,PB.5751.75,PB.5751.56,PB.5751.53,PB.5751.43,PB.5751.30,PB.5751.12…
Scaffold_35	Ppup020230	Ppup020230;A3:Scaffold_35:429019-430305:429019-430308:+	PB.5773.10,PB.5773.14,PB.5773.28,PB.5773.31,PB.5773.32	PB.5773.14,PB.5773.28,PB.5773.31,PB.5773.32,PB.5773.10,PB.5773.33
Scaffold_35	Ppup020230	Ppup020230;A3:Scaffold_35:429019-429434:429019-430305:+	PB.5773.18,PB.5773.19,PB.5773.4,PB.5773.7	PB.5773.14,PB.5773.19,PB.5773.28,PB.5773.31,PB.5773.18,PB.5773.32,PB.5773.4,PB.5773.10,PB.5773.7
Scaffold_35	Ppup020230	Ppup020230;A3:Scaffold_35:429019-429434:429019-430308:+	PB.5773.18,PB.5773.19,PB.5773.4,PB.5773.7	PB.5773.18,PB.5773.4,PB.5773.19,PB.5773.7,PB.5773.33
Scaffold_35	Ppup020360	Ppup020360;A3:Scaffold_35:845878-848490:845878-848493:+	PB.5784.12	PB.5784.11,PB.5784.12
Scaffold_35	Ppup020770	Ppup020770;A3:Scaffold_35:1340404-1340474:1340404-1340492:+	PB.5819.2	PB.5819.2,PB.5819.1
Scaffold_35	Ppup021070	Ppup021070;A3:Scaffold_35:1694856-1694941:1694856-1694957:+	PB.5844.1,PB.5844.11,PB.5844.5,PB.5844.7,PB.5844.10,PB.5844.16,PB.5844.17	PB.5844.10,PB.5844.17,PB.5844.5,PB.5844.11,PB.5844.1,PB.5844.7,PB.5844.15,PB.5844.16
Scaffold_35	Ppup021300	Ppup021300;A3:Scaffold_35:1825213-1825572:1825213-1825607:+	PB.5865.1,PB.5865.3	PB.5865.3,PB.5865.1,PB.5865.2
Scaffold_35	Ppup021300	Ppup021300;A3:Scaffold_35:1826945-1827585:1826945-1829226:+	PB.5865.1	PB.5865.4,PB.5865.3,PB.5865.1,PB.5865.2
Scaffold_35	Ppup021300	Ppup021300;A3:Scaffold_35:1857174-1857360:1857174-1857375:+	PB.5866.7,PB.5866.12	PB.5866.3,PB.5866.10,PB.5866.1,PB.5866.12,PB.5866.11,PB.5866.14,PB.5866.6,PB.5866.5,PB.5866.4,PB.5866.2,PB.5866.13,PB.5866.15,PB.5866.8,PB.5866.7
Scaffold_35	Ppup021690	Ppup021690;A3:Scaffold_35:2078207-2078538:2078207-2078574:+	PB.5896.1,PB.5896.4	PB.5896.4,PB.5896.3,PB.5896.1
Scaffold_35	Ppup022310	Ppup022310;A3:Scaffold_35:2994118-2994187:2994118-2994220:+	PB.5936.1	PB.5936.4,PB.5936.1,PB.5936.5
Scaffold_35	Ppup022310	Ppup022310;A3:Scaffold_35:2994118-2994187:2994118-2994258:+	PB.5936.1	PB.5936.6,PB.5936.1
Scaffold_35	Ppup022310	Ppup022310;A3:Scaffold_35:2994118-2994220:2994118-2994258:+	PB.5936.5,PB.5936.4	PB.5936.6,PB.5936.4,PB.5936.5
Scaffold_361	Ppup100630	Ppup100630;A3:Scaffold_361:56014-56117:55999-56117:-	PB.8290.2,PB.8290.10,PB.8290.12	PB.8290.3,PB.8290.2,PB.8290.10,PB.8290.9,PB.8290.12,PB.8290.8
Scaffold_361	Ppup100630	Ppup100630;A3:Scaffold_361:57238-57355:57235-57355:-	PB.8290.10,PB.8290.9,PB.8290.12	PB.8290.3,PB.8290.2,PB.8290.10,PB.8290.9,PB.8290.12
Scaffold_361	Ppup100570	Ppup100570;A3:Scaffold_361:29553-29657:29553-29675:+	PB.8287.1	PB.8287.3,PB.8287.1,PB.8287.4
Scaffold_361	Ppup100890	Ppup100890;A3:Scaffold_361:340972-341045:340972-341048:+	PB.8307.1	PB.8307.1,PB.8307.2
Scaffold_361	Ppup101160	Ppup101160;A3:Scaffold_361:561427-561642:561427-561706:+	PB.8326.10,PB.8326.8,PB.8326.3,PB.8326.2,PB.8326.11	PB.8326.3,PB.8326.11,PB.8326.5,PB.8326.8,PB.8326.10,PB.8326.2
Scaffold_361	Ppup101160	Ppup101160;A3:Scaffold_361:561427-561585:561427-561642:+	PB.8326.9,PB.8326.7,PB.8326.1	PB.8326.3,PB.8326.11,PB.8326.8,PB.8326.10,PB.8326.2,PB.8326.1,PB.8326.9,PB.8326.7
Scaffold_361	Ppup101160	Ppup101160;A3:Scaffold_361:561427-561585:561427-561706:+	PB.8326.9,PB.8326.7,PB.8326.1	PB.8326.1,PB.8326.5,PB.8326.7,PB.8326.9
Scaffold_375	novelGeneMSTRG.8048	novelGeneMSTRG.8048;A3:Scaffold_375:148166-148295:148166-148314:+	MSTRG.8048.1	MSTRG.8048.2,MSTRG.8048.1
Scaffold_38	Ppup088860_Ppup088870	Ppup088860_Ppup088870;A3:Scaffold_38:814693-814768:814693-814783:+	PB.5941.1	PB.5941.3,PB.5941.2,PB.5941.1,PB.5941.5
Scaffold_387	Ppup034100	Ppup034100;A3:Scaffold_387:142184-142277:142180-142277:-	PB.8369.8,PB.8369.9	PB.8369.3,PB.8369.8,PB.8369.9
Scaffold_387	Ppup034100	Ppup034100;A3:Scaffold_387:149999-161143:149978-161143:-	PB.8369.9,PB.8369.19,PB.8369.10,PB.8369.12	PB.8369.19,PB.8369.13,PB.8369.10,PB.8369.11,PB.8369.12,PB.8369.9
Scaffold_4	Ppup005600	Ppup005600;A3:Scaffold_4:252885-252976:252873-252976:-	PB.1703.1,PB.1703.2,PB.1703.13	PB.1703.3,PB.1703.2,PB.1703.1,PB.1703.13
Scaffold_4	Ppup005890	Ppup005890;A3:Scaffold_4:839320-839406:839317-839406:-	PB.1723.3	PB.1723.3,PB.1723.1,PB.1723.2
Scaffold_4	Ppup006120	Ppup006120;A3:Scaffold_4:1168646-1168994:1168631-1168994:-	PB.1742.1	PB.1742.2,PB.1742.1
Scaffold_4	Ppup006210	Ppup006210;A3:Scaffold_4:1299566-1299640:1299527-1299640:-	PB.1747.1	PB.1747.1,PB.1747.4
Scaffold_4	Ppup006310	Ppup006310;A3:Scaffold_4:1377494-1377555:1377469-1377555:-	PB.1758.1	PB.1758.1,PB.1758.2
Scaffold_4	Ppup006490	Ppup006490;A3:Scaffold_4:1488105-1489206:1488082-1489206:-	PB.1777.3,PB.1777.4,PB.1777.7	PB.1777.1,PB.1777.4,PB.1777.3,PB.1777.7
Scaffold_4	Ppup006810	Ppup006810;A3:Scaffold_4:1887963-1888842:1887815-1888842:-	PB.1799.1,PB.1799.4	PB.1799.4,PB.1799.2,PB.1799.1
Scaffold_4	Ppup006820	Ppup006820;A3:Scaffold_4:1899985-1902308:1899944-1902308:-	PB.1801.2	PB.1801.3,PB.1801.2
Scaffold_4	novelGenePB.1810	novelGenePB.1810;A3:Scaffold_4:2112242-2112305:2112234-2112305:-	PB.1810.10	PB.1810.10,PB.1810.11,PB.1810.9,PB.1810.8,PB.1810.13
Scaffold_4	Ppup007130	Ppup007130;A3:Scaffold_4:2302071-2303738:2302065-2303738:-	PB.1821.3	PB.1821.3,PB.1821.2
Scaffold_4	Ppup007780	Ppup007780;A3:Scaffold_4:3006863-3007124:3006859-3007124:-	PB.1865.5	PB.1865.1,PB.1865.3,PB.1865.5
Scaffold_4	Ppup007900	Ppup007900;A3:Scaffold_4:3149095-3149209:3149080-3149209:-	MSTRG.8313.3	MSTRG.8313.2,MSTRG.8313.3
Scaffold_4	Ppup008830	Ppup008830;A3:Scaffold_4:4327951-4328542:4327769-4328542:-	PB.1899.2	PB.1899.2,PB.1899.6
Scaffold_4	Ppup008830	Ppup008830;A3:Scaffold_4:4327951-4328542:4327662-4328542:-	PB.1899.2	PB.1899.8,PB.1899.2
Scaffold_4	Ppup008830	Ppup008830;A3:Scaffold_4:4327769-4328542:4327662-4328542:-	PB.1899.6	PB.1899.8,PB.1899.6
Scaffold_4	Ppup009890	Ppup009890;A3:Scaffold_4:5847398-5847468:5847397-5847468:-	PB.1959.1	PB.1959.2,PB.1959.3,PB.1959.4,PB.1959.1,PB.1959.5
Scaffold_4	Ppup009930	Ppup009930;A3:Scaffold_4:5905571-5906608:5905340-5906608:-	PB.1964.4	PB.1964.4,PB.1964.3
Scaffold_4	Ppup010000	Ppup010000;A3:Scaffold_4:5969442-5973418:5969388-5973418:-	PB.1969.2	PB.1969.1,PB.1969.2
Scaffold_4	Ppup010330	Ppup010330;A3:Scaffold_4:6407532-6410030:6406569-6410030:-	PB.1994.1,PB.1994.4	PB.1994.4,PB.1994.5,PB.1994.1
Scaffold_4	Ppup010640	Ppup010640;A3:Scaffold_4:6784671-6784739:6784659-6784739:-	PB.2013.1,PB.2013.10,PB.2013.9,PB.2013.12,PB.2013.6,PB.2013.7	PB.2013.8,PB.2013.1,PB.2013.12,PB.2013.13,PB.2013.11,PB.2013.5,PB.2013.6,PB.2013.2,PB.2013.9,PB.2013.10,PB.2013.7
Scaffold_4	Ppup010640	Ppup010640;A3:Scaffold_4:6784671-6784739:6784647-6784739:-	PB.2013.1,PB.2013.10,PB.2013.9,PB.2013.12,PB.2013.6,PB.2013.7	PB.2013.1,PB.2013.12,PB.2013.3,PB.2013.6,PB.2013.9,PB.2013.10,PB.2013.7
Scaffold_4	Ppup010640	Ppup010640;A3:Scaffold_4:6785139-6785413:6785124-6785413:-	PB.2013.1,PB.2013.11,PB.2013.5,PB.2013.9,PB.2013.2,PB.2013.3,PB.2013.4	PB.2013.4,PB.2013.8,PB.2013.1,PB.2013.3,PB.2013.6,PB.2013.13,PB.2013.2,PB.2013.11,PB.2013.5,PB.2013.9,PB.2013.10,PB.2013.7
Scaffold_4	Ppup010640	Ppup010640;A3:Scaffold_4:6786109-6786410:6786104-6786410:-	PB.2013.1,PB.2013.10,PB.2013.11,PB.2013.5,PB.2013.9,PB.2013.12,PB.2013.2,PB.2013.4,PB.2013.6,PB.2013.7,PB.2013.8	PB.2013.4,PB.2013.8,PB.2013.1,PB.2013.12,PB.2013.6,PB.2013.13,PB.2013.11,PB.2013.5,PB.2013.2,PB.2013.9,PB.2013.10,PB.2013.7
Scaffold_4	Ppup010640	Ppup010640;A3:Scaffold_4:6784659-6784739:6784647-6784739:-	PB.2013.11,PB.2013.13,PB.2013.5,PB.2013.2,PB.2013.8	PB.2013.8,PB.2013.3,PB.2013.13,PB.2013.2,PB.2013.11,PB.2013.5
Scaffold_4	Ppup010640	Ppup010640;A3:Scaffold_4:6785686-6785851:6785665-6785851:-	PB.2013.11,PB.2013.5,PB.2013.9,PB.2013.12,PB.2013.2,PB.2013.4,PB.2013.6,PB.2013.7,PB.2013.8	PB.2013.4,PB.2013.8,PB.2013.1,PB.2013.12,PB.2013.3,PB.2013.6,PB.2013.13,PB.2013.2,PB.2013.5,PB.2013.11,PB.2013.9,PB.2013.10,PB.2013.7
Scaffold_4	Ppup011120	Ppup011120;A3:Scaffold_4:7178203-7178348:7178164-7178348:-	PB.2042.3	PB.2042.6,PB.2042.3
Scaffold_4	Ppup011120	Ppup011120;A3:Scaffold_4:7178203-7180514:7178164-7180514:-	PB.2042.2,PB.2042.5	PB.2042.2,PB.2042.5,PB.2042.1
Scaffold_4	Ppup011240	Ppup011240;A3:Scaffold_4:7328510-7328578:7328346-7328578:-	PB.2052.1,PB.2052.5	PB.2052.4,PB.2052.5,PB.2052.1,PB.2052.2,PB.2052.3
Scaffold_4	Ppup011240	Ppup011240;A3:Scaffold_4:7325484-7325555:7325478-7325555:-	PB.2052.3,PB.2052.5	PB.2052.2,PB.2052.3,PB.2052.5
Scaffold_4	Ppup011270	Ppup011270;A3:Scaffold_4:7390679-7390780:7390674-7390780:-	PB.2055.6	PB.2055.6,PB.2055.9,PB.2055.15
Scaffold_4	Ppup011470	Ppup011470;A3:Scaffold_4:7570387-7570503:7570254-7570503:-	PB.2069.2	PB.2069.6,PB.2069.2,PB.2069.5
Scaffold_4	Ppup011520	Ppup011520;A3:Scaffold_4:7654701-7654892:7654691-7654892:-	PB.2076.2	PB.2076.2,PB.2076.1
Scaffold_4	Ppup011740	Ppup011740;A3:Scaffold_4:8281905-8281978:8281902-8281978:-	PB.2087.3	PB.2087.3,PB.2087.5,PB.2087.2
Scaffold_4	Ppup005490	Ppup005490;A3:Scaffold_4:47949-48013:47949-48016:+	PB.1694.3	PB.1694.3,PB.1694.1
Scaffold_4	Ppup005560	Ppup005560;A3:Scaffold_4:146354-147982:146354-149829:+	PB.1700.2	PB.1700.2,PB.1700.8
Scaffold_4	Ppup005560_Ppup005570	Ppup005560_Ppup005570;A3:Scaffold_4:146354-149829:146354-151141:+	PB.1700.3	PB.1700.3,PB.1700.6
Scaffold_4	Ppup005560_Ppup005570	Ppup005560_Ppup005570;A3:Scaffold_4:146354-149829:146354-151159:+	PB.1700.3	PB.1700.3,PB.1700.7
Scaffold_4	Ppup005560_Ppup005570	Ppup005560_Ppup005570;A3:Scaffold_4:146354-151141:146354-151159:+	PB.1700.6	PB.1700.7,PB.1700.6
Scaffold_4	Ppup005700_Ppup005690	Ppup005700_Ppup005690;A3:Scaffold_4:339642-340379:339642-340438:+	PB.1707.3	PB.1707.4,PB.1707.3
Scaffold_4	Ppup005970	Ppup005970;A3:Scaffold_4:1012655-1012795:1012655-1012930:+	PB.1729.8,PB.1729.1,PB.1729.9	PB.1729.1,PB.1729.2,PB.1729.8,PB.1729.6,PB.1729.9
Scaffold_4	Ppup006040	Ppup006040;A3:Scaffold_4:1041718-1041794:1041718-1041806:+	PB.1735.3,PB.1735.5	PB.1735.4,PB.1735.3,PB.1735.5
Scaffold_4	Ppup006090	Ppup006090;A3:Scaffold_4:1144181-1144517:1144181-1144559:+	PB.1739.3,PB.1739.2	PB.1739.2,PB.1739.1,PB.1739.3
Scaffold_4	Ppup006350	Ppup006350;A3:Scaffold_4:1385838-1386386:1385838-1386420:+	PB.1761.1	PB.1761.1,PB.1761.2
Scaffold_4	Ppup006360	Ppup006360;A3:Scaffold_4:1397117-1397217:1397117-1397235:+	PB.1762.2	PB.1762.1,PB.1762.4,PB.1762.2
Scaffold_4	Ppup006500	Ppup006500;A3:Scaffold_4:1496759-1496845:1496759-1496848:+	PB.1778.3	PB.1778.5,PB.1778.3
Scaffold_4	Ppup006720	Ppup006720;A3:Scaffold_4:1707160-1707452:1707160-1707467:+	PB.1794.5,PB.1794.6,PB.1794.7,PB.1794.8	PB.1794.7,PB.1794.8,PB.1794.4,PB.1794.5,PB.1794.1,PB.1794.6
Scaffold_4	Ppup007300	Ppup007300;A3:Scaffold_4:2419767-2419838:2419767-2420025:+	PB.1832.4	PB.1832.1,PB.1832.4
Scaffold_4	Ppup007330	Ppup007330;A3:Scaffold_4:2484129-2484194:2484129-2484203:+	PB.1834.1,PB.1834.4,PB.1834.12	PB.1834.10,PB.1834.12,PB.1834.5,PB.1834.6,PB.1834.8,PB.1834.2,PB.1834.7,PB.1834.1,PB.1834.4,PB.1834.9,PB.1834.3
Scaffold_4	Ppup007690	Ppup007690;A3:Scaffold_4:2914247-2914324:2914247-2914344:+	PB.1859.2	PB.1859.1,PB.1859.13,PB.1859.2,PB.1859.12
Scaffold_4	Ppup007830	Ppup007830;A3:Scaffold_4:3051134-3053319:3051134-3053344:+	PB.1866.6,PB.1866.14,PB.1866.29,PB.1866.30	PB.1866.5,PB.1866.13,PB.1866.3,PB.1866.2,PB.1866.16,PB.1866.26,PB.1866.1,PB.1866.17,PB.1866.25,PB.1866.23,PB.1866.33,PB.1866.19,PB.1866.35,PB.1866.21,PB.1866.9,PB.1866.28,PB.1866.8,PB.1866.18,PB.1866.30,PB.1866.6,PB.1866.22,PB.1866.32,PB.1866.15,PB.1866.24,PB.1866.11,PB.1866.27,PB.1866.4,PB.1866.29,PB.1866.34,PB.1866.12,PB.1866.10,PB.1866.14,PB.1866.20,PB.1866.31,PB.1866.7
Scaffold_4	Ppup007850	Ppup007850;A3:Scaffold_4:3066948-3067460:3066948-3067527:+	PB.1867.3	PB.1867.2,PB.1867.3
Scaffold_4	Ppup007870	Ppup007870;A3:Scaffold_4:3084452-3086929:3084452-3086943:+	PB.1870.4	PB.1870.4,PB.1870.1
Scaffold_4	Ppup007970	Ppup007970;A3:Scaffold_4:3323762-3324459:3323762-3324498:+	PB.1873.1	PB.1873.1,PB.1873.2
Scaffold_4	Ppup008030_Ppup008080	Ppup008030_Ppup008080;A3:Scaffold_4:3456545-3506050:3456545-3506603:+	PB.1879.36,PB.1879.267,PB.1879.198	PB.1879.180,PB.1879.267,PB.1879.36,PB.1879.198,PB.1879.97
Scaffold_4	Ppup008030_Ppup008580	Ppup008030_Ppup008580;A3:Scaffold_4:3449164-3451112:3449164-3451115:+	PB.1879.202	PB.1879.270,PB.1879.202
Scaffold_4	Ppup008680	Ppup008680;A3:Scaffold_4:4002214-4002322:4002214-4002340:+	PB.1883.4,PB.1883.2	PB.1883.1,PB.1883.3,PB.1883.4,PB.1883.2
Scaffold_4	Ppup008760	Ppup008760;A3:Scaffold_4:4049389-4049716:4049389-4049739:+	PB.1889.13	PB.1889.10,PB.1889.6,PB.1889.13,PB.1889.18
Scaffold_4	Ppup008770	Ppup008770;A3:Scaffold_4:4090312-4090421:4090312-4090434:+	PB.1891.2,PB.1891.8,PB.1891.12,PB.1891.13,PB.1891.6,PB.1891.10,PB.1891.9	PB.1891.13,PB.1891.10,PB.1891.9,PB.1891.12,PB.1891.4,PB.1891.3,PB.1891.2,PB.1891.6,PB.1891.8
Scaffold_4	Ppup008770	Ppup008770;A3:Scaffold_4:4089204-4090164:4089204-4090276:+	PB.1891.3,PB.1891.8,PB.1891.12,PB.1891.6,PB.1891.4,PB.1891.10,PB.1891.9	PB.1891.10,PB.1891.9,PB.1891.12,PB.1891.4,PB.1891.3,PB.1891.2,PB.1891.6,PB.1891.8
Scaffold_4	novelGenePB.1892	novelGenePB.1892;A3:Scaffold_4:4109592-4109704:4109592-4109822:+	PB.1892.3,PB.1892.1	PB.1892.1,PB.1892.2,PB.1892.3
Scaffold_4	Ppup009420	Ppup009420;A3:Scaffold_4:5230336-5230622:5230336-5230625:+	PB.1929.6,PB.1929.2	PB.1929.6,PB.1929.2,PB.1929.1
Scaffold_4	Ppup009470	Ppup009470;A3:Scaffold_4:5308115-5308556:5308115-5308667:+	PB.1932.1,PB.1932.8,PB.1932.9,PB.1932.2,PB.1932.10	PB.1932.2,PB.1932.8,PB.1932.5,PB.1932.9,PB.1932.1,PB.1932.10
Scaffold_4	Ppup009470	Ppup009470;A3:Scaffold_4:5310327-5310398:5310327-5310408:+	PB.1932.1,PB.1932.5,PB.1932.2,PB.1932.4,PB.1932.10,PB.1932.11,PB.1932.12,PB.1932.13,PB.1932.14	PB.1932.2,PB.1932.12,PB.1932.13,PB.1932.14,PB.1932.8,PB.1932.5,PB.1932.4,PB.1932.1,PB.1932.10,PB.1932.11
Scaffold_4	Ppup009660	Ppup009660;A3:Scaffold_4:5495800-5495884:5495800-5495911:+	PB.1946.1,PB.1946.6	PB.1946.2,PB.1946.1,PB.1946.6
Scaffold_4	Ppup009660	Ppup009660;A3:Scaffold_4:5495800-5495872:5495800-5495884:+	PB.1946.4	PB.1946.4,PB.1946.1,PB.1946.6
Scaffold_4	Ppup009660	Ppup009660;A3:Scaffold_4:5495800-5495872:5495800-5495911:+	PB.1946.4	PB.1946.2,PB.1946.4
Scaffold_4	Ppup009830	Ppup009830;A3:Scaffold_4:5624063-5624119:5624063-5624145:+	PB.1953.2	PB.1953.7,PB.1953.3,PB.1953.5,PB.1953.2
Scaffold_4	Ppup010170	Ppup010170;A3:Scaffold_4:6254138-6256194:6254138-6256703:+	PB.1980.8,PB.1980.4	PB.1980.4,PB.1980.16,PB.1980.8
Scaffold_4	Ppup010170_Ppup010180	Ppup010170_Ppup010180;A3:Scaffold_4:6260087-6260866:6260087-6261653:+	PB.1980.20	PB.1980.22,PB.1980.24,PB.1980.20,PB.1980.12,PB.1980.9
Scaffold_4	Ppup010170_Ppup010180	Ppup010170_Ppup010180;A3:Scaffold_4:6260087-6260866:6260087-6262002:+	PB.1980.20	PB.1980.20,PB.1980.14
Scaffold_4	Ppup010920	Ppup010920;A3:Scaffold_4:7023502-7027011:7023502-7027017:+	PB.2027.1,PB.2027.7,PB.2027.10,PB.2027.9	PB.2027.4,PB.2027.7,PB.2027.9,PB.2027.10,PB.2027.11,PB.2027.8,PB.2027.1
Scaffold_4	Ppup010940	Ppup010940;A3:Scaffold_4:7035582-7037872:7035582-7037896:+	PB.2029.1,PB.2029.16,PB.2029.6,PB.2029.17,PB.2029.20,PB.2029.22,PB.2029.25,PB.2029.24	PB.2029.16,PB.2029.20,PB.2029.24,PB.2029.1,PB.2029.17,PB.2029.6,PB.2029.22,PB.2029.25,PB.2029.14
Scaffold_4	Ppup010940	Ppup010940;A3:Scaffold_4:7039508-7041838:7039508-7041958:+	PB.2029.16,PB.2029.2,PB.2029.26,PB.2029.6	PB.2029.16,PB.2029.2,PB.2029.11,PB.2029.10,PB.2029.5,PB.2029.19,PB.2029.26,PB.2029.24,PB.2029.8,PB.2029.1,PB.2029.28,PB.2029.17,PB.2029.6,PB.2029.14,PB.2029.22,PB.2029.25,PB.2029.3
Scaffold_4	Ppup010970_Ppup010990	Ppup010970_Ppup010990;A3:Scaffold_4:7065382-7065570:7065382-7065603:+	PB.2031.2	PB.2031.3,PB.2031.2
Scaffold_4	Ppup011170	Ppup011170;A3:Scaffold_4:7203379-7204987:7203379-7205014:+	PB.2045.3	PB.2045.4,PB.2045.6,PB.2045.3,PB.2045.1
Scaffold_4	Ppup011430	Ppup011430;A3:Scaffold_4:7451755-7451900:7451755-7451915:+	PB.2063.7,PB.2063.4,PB.2063.8	PB.2063.4,PB.2063.1,PB.2063.9,PB.2063.2,PB.2063.7,PB.2063.8,PB.2063.5,PB.2063.10
Scaffold_4	Ppup011610	Ppup011610;A3:Scaffold_4:8092952-8094011:8092952-8094049:+	PB.2082.2,PB.2082.9	PB.2082.2,PB.2082.7,PB.2082.9
Scaffold_4	Ppup011610	Ppup011610;A3:Scaffold_4:8092952-8093921:8092952-8094011:+	PB.2082.4	PB.2082.2,PB.2082.4,PB.2082.9
Scaffold_4	Ppup011610	Ppup011610;A3:Scaffold_4:8092952-8093921:8092952-8094049:+	PB.2082.4	PB.2082.4,PB.2082.7
Scaffold_4	Ppup011810	Ppup011810;A3:Scaffold_4:8390854-8432079:8390854-8432100:+	PB.2089.2,PB.2089.5,PB.2089.6,PB.2089.14,PB.2089.7	PB.2089.14,PB.2089.10,PB.2089.2,PB.2089.5,PB.2089.3,PB.2089.6,PB.2089.8,PB.2089.7
Scaffold_4	Ppup011810	Ppup011810;A3:Scaffold_4:8426764-8432079:8426764-8432100:+	PB.2089.41	PB.2089.42,PB.2089.41,PB.2089.38,PB.2089.39
Scaffold_40	Ppup005000	Ppup005000;A3:Scaffold_40:89693-90114:89693-90126:+	PB.5944.3	PB.5944.3,PB.5944.1
Scaffold_403	novelGeneMSTRG.8652	novelGeneMSTRG.8652;A3:Scaffold_403:10739-10811:10739-10861:+	MSTRG.8652.2,MSTRG.8652.1,MSTRG.8652.3	MSTRG.8652.3,MSTRG.8652.1,MSTRG.8652.2,MSTRG.8652.4
Scaffold_404	Ppup023010	Ppup023010;A3:Scaffold_404:39965-40039:39965-40053:+	PB.8380.3,PB.8380.2	PB.8380.3,PB.8380.4,PB.8380.2
Scaffold_404	Ppup023070	Ppup023070;A3:Scaffold_404:104825-105261:104825-105309:+	MSTRGCarcass.8055.2	MSTRGCarcass.8055.1,MSTRGCarcass.8055.2
Scaffold_415	Ppup023330	Ppup023330;A3:Scaffold_415:181446-186697:181446-186742:+	PB.8393.3,PB.8393.7	PB.8393.7,PB.8393.2,PB.8393.4,PB.8393.1,PB.8393.3
Scaffold_427	Ppup005310_Ppup005300	Ppup005310_Ppup005300;A3:Scaffold_427:64457-75362:64454-75362:-	PB.8402.2,PB.8402.3,PB.8402.4,PB.8402.6,PB.8402.8	PB.8402.3,PB.8402.6,PB.8402.5,PB.8402.8,PB.8402.4,PB.8402.2
Scaffold_449	Ppup005380	Ppup005380;A3:Scaffold_449:31409-31487:31409-31586:+	MSTRG.8765.2	MSTRG.8765.2,MSTRG.8765.1
Scaffold_45	Ppup055720	Ppup055720;A3:Scaffold_45:348815-350437:348812-350437:-	PB.5961.9	PB.5961.9,PB.5961.16
Scaffold_462	Ppup023680	Ppup023680;A3:Scaffold_462:93733-93812:93733-93815:+	PB.8418.1,PB.8418.4,PB.8418.6,PB.8418.7,PB.8418.12	PB.8418.14,PB.8418.11,PB.8418.12,PB.8418.10,PB.8418.16,PB.8418.7,PB.8418.1,PB.8418.6,PB.8418.8,PB.8418.4
Scaffold_462	Ppup023680	Ppup023680;A3:Scaffold_462:94246-95545:94246-95554:+	PB.8418.16	PB.8418.14,PB.8418.10,PB.8418.16,PB.8418.7,PB.8418.6,PB.8418.4
Scaffold_481	Ppup072780	Ppup072780;A3:Scaffold_481:11333-45615:11333-45812:+	MSTRG.8898.1	MSTRG.8898.2,MSTRG.8898.1
Scaffold_485	Ppup170780	Ppup170780;A3:Scaffold_485:42306-42392:42306-42396:+	MSTRG.8901.1,MSTRG.8901.2,MSTRG.8901.4	MSTRG.8901.4,MSTRG.8901.2,MSTRG.8901.1,MSTRG.8901.3
Scaffold_49	Ppup056640	Ppup056640;A3:Scaffold_49:453994-454701:453994-454825:+	PB.6007.2	PB.6007.2,PB.6007.1
Scaffold_49	Ppup056640	Ppup056640;A3:Scaffold_49:454125-454701:454125-454825:+	PB.6007.5	PB.6007.7,PB.6007.5
Scaffold_49	Ppup056640	Ppup056640;A3:Scaffold_49:454182-454701:454182-454825:+	PB.6007.8	PB.6007.6,PB.6007.8
Scaffold_5	Ppup024370	Ppup024370;A3:Scaffold_5:227012-227231:227007-227231:-	PB.2122.7,PB.2122.8	PB.2122.11,PB.2122.7,PB.2122.9,PB.2122.8
Scaffold_5	Ppup024750	Ppup024750;A3:Scaffold_5:638244-638529:638220-638529:-	PB.2155.3,PB.2155.5,PB.2155.6,PB.2155.7,PB.2155.1	PB.2155.5,PB.2155.4,PB.2155.1,PB.2155.7,PB.2155.2,PB.2155.3,PB.2155.6
Scaffold_5	Ppup025110	Ppup025110;A3:Scaffold_5:1169464-1169560:1169459-1169560:-	MSTRG.9015.1	MSTRG.9015.3,MSTRG.9015.1,MSTRG.9015.2
Scaffold_5	Ppup025130	Ppup025130;A3:Scaffold_5:1175272-1175633:1175260-1175633:-	PB.2159.1,PB.2159.9	PB.2159.9,PB.2159.4,PB.2159.10,PB.2159.1
Scaffold_5	Ppup025130	Ppup025130;A3:Scaffold_5:1175272-1175833:1175260-1175833:-	PB.2159.5,PB.2159.13	PB.2159.6,PB.2159.13,PB.2159.5,PB.2159.11
Scaffold_5	Ppup025490	Ppup025490;A3:Scaffold_5:1402690-1402817:1402663-1402817:-	PB.2171.1,PB.2171.2,PB.2171.11,PB.2171.10,PB.2171.5,PB.2171.6,PB.2171.12	PB.2171.5,PB.2171.6,PB.2171.11,PB.2171.1,PB.2171.12,PB.2171.2,PB.2171.9,PB.2171.10,PB.2171.8
Scaffold_5	Ppup025490	Ppup025490;A3:Scaffold_5:1403853-1411597:1403852-1411597:-	PB.2171.12	PB.2171.5,PB.2171.6,PB.2171.11,PB.2171.1,PB.2171.12,PB.2171.2,PB.2171.9,PB.2171.10,PB.2171.8
Scaffold_5	Ppup025770	Ppup025770;A3:Scaffold_5:1844733-1844968:1844703-1844968:-	PB.2195.2	PB.2195.4,PB.2195.2
Scaffold_5	Ppup025820	Ppup025820;A3:Scaffold_5:1872702-1873011:1872277-1873011:-	PB.2200.4	PB.2200.6,PB.2200.4,PB.2200.7
Scaffold_5	Ppup025880	Ppup025880;A3:Scaffold_5:1897341-1900161:1897300-1900161:-	PB.2204.4,PB.2204.7,PB.2204.8,PB.2204.15,PB.2204.20,PB.2204.21,PB.2204.29,PB.2204.31	PB.2204.7,PB.2204.8,PB.2204.24,PB.2204.4,PB.2204.31,PB.2204.15,PB.2204.21,PB.2204.20,PB.2204.29
Scaffold_5	Ppup026550	Ppup026550;A3:Scaffold_5:3089694-3089793:3089673-3089793:-	PB.2246.2,PB.2246.8,PB.2246.13,PB.2246.16,PB.2246.18	PB.2246.1,PB.2246.2,PB.2246.12,PB.2246.13,PB.2246.9,PB.2246.19,PB.2246.16,PB.2246.8,PB.2246.18
Scaffold_5	Ppup026630	Ppup026630;A3:Scaffold_5:3155528-3155941:3155056-3155941:-	PB.2252.2	PB.2252.2,PB.2252.4,PB.2252.5,PB.2252.14
Scaffold_5	Ppup026630	Ppup026630;A3:Scaffold_5:3152344-3152510:3152323-3152510:-	PB.2252.5	PB.2252.5,PB.2252.8,PB.2252.1,PB.2252.3,PB.2252.2,PB.2252.4,PB.2252.14
Scaffold_5	Ppup026900_Ppup026930	Ppup026900_Ppup026930;A3:Scaffold_5:3534061-3535730:3534058-3535730:-	PB.2279.1	PB.2279.1,PB.2279.2
Scaffold_5	Ppup026960	Ppup026960;A3:Scaffold_5:3557830-3559028:3557825-3559028:-	PB.2283.2,PB.2283.3,PB.2283.4	PB.2283.1,PB.2283.3,PB.2283.5,PB.2283.2,PB.2283.4,PB.2283.7
Scaffold_5	Ppup027150	Ppup027150;A3:Scaffold_5:3833581-3833715:3833575-3833715:-	PB.2300.9,PB.2300.5,PB.2300.6,PB.2300.7,PB.2300.1,PB.2300.4,PB.2300.2,PB.2300.3,PB.2300.15,PB.2300.19,PB.2300.20,PB.2300.13,PB.2300.14,PB.2300.21,PB.2300.18	PB.2300.6,PB.2300.1,PB.2300.13,PB.2300.18,PB.2300.23,PB.2300.3,PB.2300.20,PB.2300.2,PB.2300.14,PB.2300.9,PB.2300.19,PB.2300.21,PB.2300.5,PB.2300.7,PB.2300.15,PB.2300.4
Scaffold_5	Ppup027150	Ppup027150;A3:Scaffold_5:3832510-3833186:3832434-3833186:-	PB.2300.5,PB.2300.4,PB.2300.2	PB.2300.6,PB.2300.1,PB.2300.3,PB.2300.2,PB.2300.9,PB.2300.5,PB.2300.7,PB.2300.4
Scaffold_5	Ppup027240	Ppup027240;A3:Scaffold_5:3941463-3953094:3941454-3953094:-	PB.2307.7	PB.2307.12,PB.2307.7
Scaffold_5	Ppup027240	Ppup027240;A3:Scaffold_5:3941463-3953094:3941457-3953094:-	PB.2307.7	PB.2307.14,PB.2307.9,PB.2307.13,PB.2307.7
Scaffold_5	Ppup027240	Ppup027240;A3:Scaffold_5:3941457-3953094:3941454-3953094:-	PB.2307.13,PB.2307.14,PB.2307.9	PB.2307.14,PB.2307.12,PB.2307.9,PB.2307.13
Scaffold_5	Ppup027240	Ppup027240;A3:Scaffold_5:3996384-3996782:3996382-3996782:-	PB.2307.16	PB.2307.16,PB.2307.14
Scaffold_5	Ppup027580	Ppup027580;A3:Scaffold_5:4416098-4416174:4416095-4416174:-	MSTRG.9222.1	MSTRG.9222.2,MSTRG.9222.1
Scaffold_5	Ppup027810	Ppup027810;A3:Scaffold_5:4859867-4859936:4859856-4859936:-	PB.2340.11	PB.2340.7,PB.2340.33,PB.2340.42,PB.2340.49,PB.2340.48,PB.2340.45,PB.2340.19,PB.2340.30,PB.2340.46,PB.2340.11,PB.2340.28,PB.2340.52,PB.2340.35,PB.2340.4,PB.2340.6,PB.2340.26,PB.2340.47,PB.2340.13,PB.2340.29,PB.2340.41,PB.2340.14,PB.2340.36,PB.2340.5,PB.2340.12,PB.2340.39
Scaffold_5	Ppup027810	Ppup027810;A3:Scaffold_5:4860143-4860207:4860122-4860207:-	PB.2340.29	PB.2340.7,PB.2340.33,PB.2340.42,PB.2340.49,PB.2340.48,PB.2340.45,PB.2340.19,PB.2340.30,PB.2340.46,PB.2340.11,PB.2340.28,PB.2340.52,PB.2340.35,PB.2340.4,PB.2340.6,PB.2340.26,PB.2340.47,PB.2340.13,PB.2340.29,PB.2340.41,PB.2340.14,PB.2340.36,PB.2340.5,PB.2340.12,PB.2340.39
Scaffold_5	Ppup028260	Ppup028260;A3:Scaffold_5:5766422-5766498:5766400-5766498:-	PB.2379.1	PB.2379.1,PB.2379.2
Scaffold_5	Ppup028280	Ppup028280;A3:Scaffold_5:5775478-5775659:5775463-5775659:-	PB.2381.1,PB.2381.7,PB.2381.8	PB.2381.7,PB.2381.9,PB.2381.1,PB.2381.8
Scaffold_5	Ppup028370	Ppup028370;A3:Scaffold_5:5886153-5887454:5886140-5887454:-	MSTRG.9294.3	MSTRG.9294.3,MSTRG.9294.2
Scaffold_5	Ppup028600	Ppup028600;A3:Scaffold_5:6534540-6538297:6534537-6538297:-	PB.2405.1	PB.2405.1,PB.2405.7,PB.2405.4,PB.2405.3
Scaffold_5	Ppup028600	Ppup028600;A3:Scaffold_5:6529409-6529729:6529361-6529729:-	PB.2405.7	PB.2405.1,PB.2405.7,PB.2405.4,PB.2405.3
Scaffold_5	Ppup028650	Ppup028650;A3:Scaffold_5:6591626-6591986:6591612-6591986:-	PB.2408.3	PB.2408.1,PB.2408.3,PB.2408.2
Scaffold_5	Ppup028780	Ppup028780;A3:Scaffold_5:6787156-6787752:6787141-6787752:-	PB.2416.4	PB.2416.4,PB.2416.2
Scaffold_5	novelGeneAS199	novelGeneAS199;A3:Scaffold_5:6827334-6827409:6827331-6827409:-	PB.2424.15	PB.2424.8,PB.2424.15
Scaffold_5	Ppup024160	Ppup024160;A3:Scaffold_5:28003-28532:28003-28583:+	PB.2105.3,PB.2105.4,PB.2105.8	PB.2105.1,PB.2105.4,PB.2105.8,PB.2105.7,PB.2105.3
Scaffold_5	Ppup024160	Ppup024160;A3:Scaffold_5:27743-27816:27743-27837:+	PB.2105.4,PB.2105.1,PB.2105.7,PB.2105.8	PB.2105.1,PB.2105.4,PB.2105.8,PB.2105.7,PB.2105.3
Scaffold_5	Ppup024220	Ppup024220;A3:Scaffold_5:88655-109859:88655-109860:+	PB.2108.1	PB.2108.1,PB.2108.2
Scaffold_5	Ppup024270	Ppup024270;A3:Scaffold_5:155258-155595:155258-156776:+	PB.2114.2,PB.2114.3	PB.2114.2,PB.2114.3,PB.2114.7,PB.2114.11
Scaffold_5	Ppup024270	Ppup024270;A3:Scaffold_5:155258-155595:155258-157735:+	PB.2114.2,PB.2114.3	PB.2114.2,PB.2114.3,PB.2114.12
Scaffold_5	Ppup024270	Ppup024270;A3:Scaffold_5:155258-156776:155258-157735:+	PB.2114.7	PB.2114.12,PB.2114.7
Scaffold_5	Ppup024510	Ppup024510;A3:Scaffold_5:396097-397154:396097-397185:+	PB.2130.2,PB.2130.3	PB.2130.2,PB.2130.4,PB.2130.3
Scaffold_5	Ppup024510	Ppup024510;A3:Scaffold_5:436064-436136:436064-436160:+	PB.2130.2,PB.2130.4	PB.2130.2,PB.2130.4,PB.2130.3
Scaffold_5	Ppup024560	Ppup024560;A3:Scaffold_5:489525-491334:489525-491355:+	PB.2134.3,PB.2134.4,PB.2134.5	PB.2134.4,PB.2134.2,PB.2134.5,PB.2134.3
Scaffold_5	Ppup024560	Ppup024560;A3:Scaffold_5:485731-485817:485731-485820:+	PB.2134.2,PB.2134.4,PB.2134.5	PB.2134.2,PB.2134.4,PB.2134.5,PB.2134.3
Scaffold_5	Ppup024560	Ppup024560;A3:Scaffold_5:487426-487542:487426-487557:+	PB.2134.2,PB.2134.4	PB.2134.2,PB.2134.4,PB.2134.5
Scaffold_5	Ppup024690	Ppup024690;A3:Scaffold_5:586157-587011:586157-587064:+	PB.2145.1,PB.2145.3,PB.2145.2	PB.2145.4,PB.2145.1,PB.2145.2,PB.2145.3
Scaffold_5	Ppup024980	Ppup024980;A3:Scaffold_5:1027059-1027118:1027059-1027131:+	PB.2153.10	PB.2153.1,PB.2153.5,PB.2153.7,PB.2153.10,PB.2153.6,PB.2153.11,PB.2153.9,PB.2153.4,PB.2153.3
Scaffold_5	Ppup025690	Ppup025690;A3:Scaffold_5:1646448-1647018:1646448-1647030:+	PB.2188.1,PB.2188.11,PB.2188.9	PB.2188.9,PB.2188.3,PB.2188.2,PB.2188.4,PB.2188.6,PB.2188.1,PB.2188.11,PB.2188.7
Scaffold_5	Ppup025690	Ppup025690;A3:Scaffold_5:1644563-1645049:1644563-1645061:+	PB.2188.3	PB.2188.7,PB.2188.3
Scaffold_5	Ppup025690	Ppup025690;A3:Scaffold_5:1644637-1645049:1644637-1645061:+	PB.2188.4,PB.2188.5,PB.2188.9	PB.2188.5,PB.2188.9,PB.2188.4,PB.2188.6,PB.2188.11
Scaffold_5	Ppup025790	Ppup025790;A3:Scaffold_5:1864124-1864235:1864124-1865612:+	PB.2197.3,PB.2197.2,PB.2197.1	PB.2197.5,PB.2197.3,PB.2197.1,PB.2197.2,PB.2197.4
Scaffold_5	Ppup025810	Ppup025810;A3:Scaffold_5:1869194-1869281:1869194-1869286:+	MSTRG.9073.2	MSTRG.9073.3,MSTRG.9073.2
Scaffold_5	Ppup025910	Ppup025910;A3:Scaffold_5:1915185-1915246:1915185-1915451:+	PB.2207.4,PB.2207.3	PB.2207.4,PB.2207.13,PB.2207.6,PB.2207.11,PB.2207.9,PB.2207.12,PB.2207.7,PB.2207.8,PB.2207.1,PB.2207.3,PB.2207.5,PB.2207.10,PB.2207.14
Scaffold_5	Ppup026430	Ppup026430;A3:Scaffold_5:2991674-2992325:2991674-2992406:+	MSTRG.9126.2	MSTRG.9126.3,MSTRG.9126.2
Scaffold_5	Ppup026450	Ppup026450;A3:Scaffold_5:3047986-3048061:3047986-3048064:+	PB.2240.1,PB.2240.2,PB.2240.4,PB.2240.3	PB.2240.2,PB.2240.4,PB.2240.3,PB.2240.5,PB.2240.1
Scaffold_5	Ppup026560	Ppup026560;A3:Scaffold_5:3094901-3095373:3094901-3095539:+	MSTRG.9138.3	MSTRG.9138.3,MSTRG.9138.1
Scaffold_5	Ppup026860	Ppup026860;A3:Scaffold_5:3356152-3356227:3356152-3356265:+	PB.2272.4	PB.2272.2,PB.2272.4,PB.2272.1
Scaffold_5	Ppup027050	Ppup027050;A3:Scaffold_5:3786338-3786937:3786338-3786941:+	PB.2291.6,PB.2291.3,PB.2291.2,PB.2291.1	PB.2291.6,PB.2291.7,PB.2291.5,PB.2291.3,PB.2291.2,PB.2291.1
Scaffold_5	Ppup027120	Ppup027120;A3:Scaffold_5:3813884-3813998:3813884-3814001:+	PB.2297.5,PB.2297.8	PB.2297.6,PB.2297.5,PB.2297.8,PB.2297.10,PB.2297.3
Scaffold_5	Ppup027250	Ppup027250;A3:Scaffold_5:4003276-4003348:4003276-4003368:+	PB.2308.1,PB.2308.3,PB.2308.4,PB.2308.8	PB.2308.4,PB.2308.5,PB.2308.3,PB.2308.8,PB.2308.1
Scaffold_5	Ppup027250	Ppup027250;A3:Scaffold_5:4003276-4003348:4003276-4003387:+	PB.2308.1,PB.2308.3,PB.2308.4,PB.2308.8	PB.2308.4,PB.2308.6,PB.2308.3,PB.2308.8,PB.2308.1
Scaffold_5	Ppup027250	Ppup027250;A3:Scaffold_5:4003276-4003368:4003276-4003387:+	PB.2308.5	PB.2308.5,PB.2308.6
Scaffold_5	Ppup027270	Ppup027270;A3:Scaffold_5:4010229-4010319:4010229-4010330:+	PB.2310.2,PB.2310.9,PB.2310.5,PB.2310.1,PB.2310.10	PB.2310.1,PB.2310.2,PB.2310.10,PB.2310.5,PB.2310.7,PB.2310.9
Scaffold_5	Ppup027410	Ppup027410;A3:Scaffold_5:4092289-4092374:4092289-4092404:+	PB.2319.2,PB.2319.4,PB.2319.9	PB.2319.2,PB.2319.9,PB.2319.4,PB.2319.8,PB.2319.6
Scaffold_5	Ppup027680	Ppup027680;A3:Scaffold_5:4621994-4622217:4621994-4622235:+	PB.2328.1	PB.2328.2,PB.2328.1
Scaffold_5	Ppup027790	Ppup027790;A3:Scaffold_5:4849124-4849485:4849124-4849494:+	PB.2338.1	PB.2338.1,PB.2338.2
Scaffold_5	Ppup027920	Ppup027920;A3:Scaffold_5:4977395-4977428:4977395-4977430:+	MSTRG.9255.2	MSTRG.9255.4,MSTRG.9255.2
Scaffold_5	Ppup027920	Ppup027920;A3:Scaffold_5:4977395-4977426:4977395-4977428:+	MSTRG.9255.3	MSTRG.9255.3,MSTRG.9255.2
Scaffold_5	Ppup027920	Ppup027920;A3:Scaffold_5:4977395-4977426:4977395-4977430:+	MSTRG.9255.3	MSTRG.9255.4,MSTRG.9255.3
Scaffold_5	Ppup028400	Ppup028400;A3:Scaffold_5:5901442-5901513:5901442-5901535:+	PB.2390.1,PB.2390.4,PB.2390.5,PB.2390.6,PB.2390.8,PB.2390.9,PB.2390.10,PB.2390.11,PB.2390.12,PB.2390.13,PB.2390.14,PB.2390.17,PB.2390.19,PB.2390.20	PB.2390.10,PB.2390.11,PB.2390.8,PB.2390.9,PB.2390.6,PB.2390.17,PB.2390.4,PB.2390.19,PB.2390.1,PB.2390.5,PB.2390.12,PB.2390.15,PB.2390.14,PB.2390.20,PB.2390.13
Scaffold_5	Ppup028400	Ppup028400;A3:Scaffold_5:5901697-5901786:5901697-5901843:+	PB.2390.1,PB.2390.4,PB.2390.5,PB.2390.6,PB.2390.8,PB.2390.9,PB.2390.11,PB.2390.12,PB.2390.13,PB.2390.15,PB.2390.14,PB.2390.17,PB.2390.19,PB.2390.20	PB.2390.11,PB.2390.10,PB.2390.8,PB.2390.9,PB.2390.6,PB.2390.17,PB.2390.4,PB.2390.19,PB.2390.1,PB.2390.5,PB.2390.12,PB.2390.15,PB.2390.14,PB.2390.20,PB.2390.13
Scaffold_5	Ppup028440	Ppup028440;A3:Scaffold_5:5925734-5925822:5925734-5925837:+	PB.2395.4,PB.2395.5,PB.2395.1,PB.2395.2,PB.2395.3	PB.2395.3,PB.2395.2,PB.2395.1,PB.2395.7,PB.2395.4,PB.2395.5
Scaffold_5	Ppup028440	Ppup028440;A3:Scaffold_5:5927406-5927872:5927406-5927925:+	PB.2395.4,PB.2395.2,PB.2395.3	PB.2395.3,PB.2395.2,PB.2395.1,PB.2395.4,PB.2395.5
Scaffold_5	Ppup028440	Ppup028440;A3:Scaffold_5:5924281-5924754:5924281-5924769:+	PB.2395.3	PB.2395.3,PB.2395.2,PB.2395.1,PB.2395.7,PB.2395.4,PB.2395.5
Scaffold_5	Ppup028470	Ppup028470;A3:Scaffold_5:5959122-5959298:5959122-5959322:+	PB.2396.15,PB.2396.13,PB.2396.10,PB.2396.5,PB.2396.3	PB.2396.10,PB.2396.7,PB.2396.17,PB.2396.5,PB.2396.15,PB.2396.11,PB.2396.3,PB.2396.13,PB.2396.2,PB.2396.12
Scaffold_5	Ppup028810	Ppup028810;A3:Scaffold_5:6811571-6811771:6811571-6811792:+	PB.2420.2,PB.2420.1,PB.2420.6,PB.2420.3,PB.2420.7,PB.2420.4,PB.2420.8,PB.2420.11,PB.2420.10,PB.2420.14	PB.2420.11,PB.2420.10,PB.2420.1,PB.2420.14,PB.2420.3,PB.2420.8,PB.2420.7,PB.2420.4,PB.2420.12,PB.2420.6,PB.2420.2
Scaffold_50	Ppup116510	Ppup116510;A3:Scaffold_50:24032-24602:23452-24602:-	PB.6013.2,PB.6013.10	PB.6013.10,PB.6013.2,PB.6013.3
Scaffold_50	Ppup116510	Ppup116510;A3:Scaffold_50:24032-24602:23537-24602:-	PB.6013.2,PB.6013.10	PB.6013.8,PB.6013.7,PB.6013.10,PB.6013.2,PB.6013.16,PB.6013.6
Scaffold_50	Ppup116510	Ppup116510;A3:Scaffold_50:23537-24602:23452-24602:-	PB.6013.6,PB.6013.7,PB.6013.8,PB.6013.16	PB.6013.8,PB.6013.7,PB.6013.3,PB.6013.16,PB.6013.6
Scaffold_50	Ppup116570	Ppup116570;A3:Scaffold_50:67794-70464:67462-70464:-	PB.6017.1,PB.6017.2	PB.6017.1,PB.6017.2,PB.6017.3,PB.6017.4
Scaffold_50	Ppup116740	Ppup116740;A3:Scaffold_50:325300-325375:325278-325375:-	PB.6031.2	PB.6031.4,PB.6031.3,PB.6031.1,PB.6031.2
Scaffold_50	novelGeneAS200	novelGeneAS200;A3:Scaffold_50:530238-530323:530208-530323:-	MSTRG.9386.3	MSTRG.9386.3,MSTRG.9386.2
Scaffold_50	Ppup116930	Ppup116930;A3:Scaffold_50:696497-697477:696449-697477:-	PB.6039.13,PB.6039.15,PB.6039.2,PB.6039.6	PB.6039.7,PB.6039.15,PB.6039.13,PB.6039.2,PB.6039.6,PB.6039.16,PB.6039.12
Scaffold_50	Ppup116930	Ppup116930;A3:Scaffold_50:696497-696973:696449-696973:-	PB.6039.20,PB.6039.21,PB.6039.4	PB.6039.14,PB.6039.21,PB.6039.5,PB.6039.20,PB.6039.11,PB.6039.4
Scaffold_50	Ppup116930	Ppup116930;A3:Scaffold_50:699590-701350:698993-701350:-	PB.6039.4,PB.6039.5,PB.6039.6,PB.6039.7	PB.6039.7,PB.6039.13,PB.6039.5,PB.6039.6,PB.6039.20,PB.6039.12,PB.6039.11,PB.6039.4
Scaffold_50	Ppup117110	Ppup117110;A3:Scaffold_50:903594-903724:903582-903724:-	PB.6051.1,PB.6051.2,PB.6051.9,PB.6051.13,PB.6051.14,PB.6051.16,PB.6051.17,PB.6051.3,PB.6051.8,PB.6051.19	PB.6051.8,PB.6051.9,PB.6051.1,PB.6051.3,PB.6051.13,PB.6051.17,PB.6051.15,PB.6051.2,PB.6051.4,PB.6051.16,PB.6051.19,PB.6051.14
Scaffold_50	Ppup117110	Ppup117110;A3:Scaffold_50:904402-904570:904316-904570:-	PB.6051.1,PB.6051.2,PB.6051.12,PB.6051.14,PB.6051.15,PB.6051.16,PB.6051.17,PB.6051.3,PB.6051.4,PB.6051.19,PB.6051.20,PB.6051.21	PB.6051.12,PB.6051.3,PB.6051.1,PB.6051.9,PB.6051.17,PB.6051.15,PB.6051.2,PB.6051.4,PB.6051.16,PB.6051.20,PB.6051.19,PB.6051.21,PB.6051.14
Scaffold_50	Ppup117110	Ppup117110;A3:Scaffold_50:904987-905121:904971-905121:-	PB.6051.1,PB.6051.2,PB.6051.9,PB.6051.10,PB.6051.11,PB.6051.12,PB.6051.13,PB.6051.14,PB.6051.15,PB.6051.17,PB.6051.4,PB.6051.7,PB.6051.8,PB.6051.19,PB.6051.20,PB.6051.21,PB.6051.23	PB.6051.9,PB.6051.17,PB.6051.2,PB.6051.12,PB.6051.16,PB.6051.3,PB.6051.1,PB.6051.15,PB.6051.4,PB.6051.20,PB.6051.11,PB.6051.14,PB.6051.7,PB.6051.8,PB.6051.23,PB.6051.13,PB.6051.10,PB.6051.21,PB.6051.19
Scaffold_50	Ppup117170	Ppup117170;A3:Scaffold_50:1006716-1007090:1006692-1007090:-	PB.6056.1,PB.6056.2,PB.6056.8	PB.6056.5,PB.6056.2,PB.6056.8,PB.6056.1
Scaffold_50	Ppup116760	Ppup116760;A3:Scaffold_50:338066-338225:338066-338237:+	PB.6033.1,PB.6033.13,PB.6033.6,PB.6033.10,PB.6033.8,PB.6033.22,PB.6033.24,PB.6033.30	PB.6033.22,PB.6033.24,PB.6033.13,PB.6033.21,PB.6033.1,PB.6033.8,PB.6033.30,PB.6033.6,PB.6033.10
Scaffold_50	Ppup116760	Ppup116760;A3:Scaffold_50:338066-338198:338066-338225:+	PB.6033.14,PB.6033.15,PB.6033.16,PB.6033.11,PB.6033.20,PB.6033.2,PB.6033.3,PB.6033.9,PB.6033.19,PB.6033.25,PB.6033.26,PB.6033.27,PB.6033.23,PB.6033.28,PB.6033.29,PB.6033.31,PB.6033.32,PB.6033.33	PB.6033.32,PB.6033.8,PB.6033.28,PB.6033.27,PB.6033.16,PB.6033.14,PB.6033.25,PB.6033.2,PB.6033.19,PB.6033.15,PB.6033.11,PB.6033.3,PB.6033.26,PB.6033.23,PB.6033.1,PB.6033.30,PB.6033.20,PB.6033.33,PB.6033.22,PB.6033.24,PB.6033.31,PB.6033.29,PB.6033.13,PB.6033.9,PB.6033.6,PB.6033.10
Scaffold_50	Ppup116760	Ppup116760;A3:Scaffold_50:338066-338198:338066-338237:+	PB.6033.14,PB.6033.15,PB.6033.16,PB.6033.11,PB.6033.20,PB.6033.2,PB.6033.3,PB.6033.9,PB.6033.19,PB.6033.25,PB.6033.26,PB.6033.27,PB.6033.23,PB.6033.28,PB.6033.29,PB.6033.31,PB.6033.32,PB.6033.33	PB.6033.32,PB.6033.28,PB.6033.27,PB.6033.16,PB.6033.14,PB.6033.25,PB.6033.2,PB.6033.19,PB.6033.21,PB.6033.15,PB.6033.11,PB.6033.3,PB.6033.26,PB.6033.23,PB.6033.20,PB.6033.33,PB.6033.31,PB.6033.29,PB.6033.9
Scaffold_50	Ppup116770	Ppup116770;A3:Scaffold_50:350538-350623:350538-350626:+	PB.6034.2,PB.6034.3	PB.6034.2,PB.6034.1,PB.6034.3
Scaffold_50	Ppup117040	Ppup117040;A3:Scaffold_50:777017-781555:777017-781560:+	PB.6047.5,PB.6047.6,PB.6047.9	PB.6047.6,PB.6047.5,PB.6047.9,PB.6047.10,PB.6047.1,PB.6047.4,PB.6047.3
Scaffold_50	Ppup117060	Ppup117060;A3:Scaffold_50:801278-802581:801278-803068:+	PB.6049.1	PB.6049.1,PB.6049.4
Scaffold_50	Ppup117290	Ppup117290;A3:Scaffold_50:1131993-1133109:1131993-1133112:+	PB.6066.4,PB.6066.7	PB.6066.8,PB.6066.3,PB.6066.9,PB.6066.6,PB.6066.4,PB.6066.13,PB.6066.7
Scaffold_53	Ppup137670	Ppup137670;A3:Scaffold_53:930826-930916:930826-930928:+	MSTRG.9538.2	MSTRG.9538.2,MSTRG.9538.1
Scaffold_53	novelGenePB.6144	novelGenePB.6144;A3:Scaffold_53:1825227-1825413:1825227-1825416:+	PB.6144.5	PB.6144.5,PB.6144.4,PB.6144.3
Scaffold_53	Ppup137480	Ppup137480;A3:Scaffold_53:546512-546584:546503-546584:-	PB.6097.1,PB.6097.5,PB.6097.2,PB.6097.10,PB.6097.12	PB.6097.10,PB.6097.5,PB.6097.12,PB.6097.4,PB.6097.2,PB.6097.1
Scaffold_54	Ppup035500	Ppup035500;A3:Scaffold_54:757317-757430:757254-757430:-	PB.6180.1	PB.6180.2,PB.6180.1
Scaffold_54	Ppup035730_Ppup035740	Ppup035730_Ppup035740;A3:Scaffold_54:994567-995361:994564-995361:-	PB.6200.9,PB.6200.22	PB.6200.9,PB.6200.22,PB.6200.21,PB.6200.14,PB.6200.8,PB.6200.1,PB.6200.7
Scaffold_54	Ppup035800	Ppup035800;A3:Scaffold_54:1021422-1023369:1021383-1023369:-	PB.6204.1,PB.6204.2,PB.6204.5,PB.6204.6,PB.6204.12	PB.6204.2,PB.6204.3,PB.6204.6,PB.6204.12,PB.6204.7,PB.6204.5,PB.6204.1,PB.6204.13
Scaffold_54	Ppup035830	Ppup035830;A3:Scaffold_54:1039928-1040269:1039924-1040269:-	MSTRG.9656.2	MSTRG.9656.1,MSTRG.9656.2
Scaffold_54	Ppup035900	Ppup035900;A3:Scaffold_54:1068380-1068485:1068378-1068485:-	PB.6214.2	PB.6214.2,PB.6214.1,PB.6214.3
Scaffold_54	Ppup035100	Ppup035100;A3:Scaffold_54:305915-306026:305915-306063:+	PB.6156.7,PB.6156.1,PB.6156.4,PB.6156.5,PB.6156.9,PB.6156.8	PB.6156.9,PB.6156.1,PB.6156.5,PB.6156.7,PB.6156.4,PB.6156.6,PB.6156.8
Scaffold_54	Ppup035280	Ppup035280;A3:Scaffold_54:651412-651817:651412-651835:+	PB.6168.4	PB.6168.4,PB.6168.11
Scaffold_54	Ppup035280	Ppup035280;A3:Scaffold_54:651333-651835:651333-651867:+	PB.6168.5	PB.6168.5,PB.6168.1
Scaffold_54	Ppup035350	Ppup035350;A3:Scaffold_54:694003-694131:694003-694142:+	PB.6173.3	PB.6173.3,PB.6173.2
Scaffold_54	Ppup035600	Ppup035600;A3:Scaffold_54:839660-840048:839660-840069:+	PB.6187.6,PB.6187.4,PB.6187.5,PB.6187.13	PB.6187.4,PB.6187.13,PB.6187.3,PB.6187.5,PB.6187.6
Scaffold_54	Ppup035670	Ppup035670;A3:Scaffold_54:953727-954032:953727-954053:+	PB.6196.3,PB.6196.12,PB.6196.17,PB.6196.15	PB.6196.4,PB.6196.17,PB.6196.13,PB.6196.12,PB.6196.15,PB.6196.3
Scaffold_553	Ppup057080	Ppup057080;A3:Scaffold_553:456269-456387:456269-456403:+	MSTRG.9763.1	MSTRG.9763.1,MSTRG.9763.2
Scaffold_558	novelGeneMSTRG.9778	novelGeneMSTRG.9778;A3:Scaffold_558:42202-43199:42202-43228:+	MSTRG.9778.1	MSTRG.9778.2,MSTRG.9778.1
Scaffold_559	novelGeneMSTRG.9780	novelGeneMSTRG.9780;A3:Scaffold_559:8659-9979:8659-9993:+	MSTRG.9780.2	MSTRG.9780.1,MSTRG.9780.2
Scaffold_575	Ppup154520	Ppup154520;A3:Scaffold_575:207867-212357:207856-212357:-	PB.8479.1	PB.8479.4,PB.8479.5,PB.8479.3,PB.8479.1,PB.8479.2,PB.8479.8
Scaffold_575	Ppup154560	Ppup154560;A3:Scaffold_575:242514-244205:242499-244205:-	PB.8483.3	PB.8483.3,PB.8483.4,PB.8483.2
Scaffold_575	Ppup154560	Ppup154560;A3:Scaffold_575:240620-242191:240617-242191:-	PB.8483.4	PB.8483.2,PB.8483.3,PB.8483.4
Scaffold_575	Ppup154610	Ppup154610;A3:Scaffold_575:281412-281611:281409-281611:-	PB.8488.9,PB.8488.10,PB.8488.2,PB.8488.32,PB.8488.38,PB.8488.33,PB.8488.20,PB.8488.37,PB.8488.39,PB.8488.43,PB.8488.44	PB.8488.43,PB.8488.3,PB.8488.38,PB.8488.37,PB.8488.32,PB.8488.44,PB.8488.11,PB.8488.19,PB.8488.10,PB.8488.39,PB.8488.33,PB.8488.20,PB.8488.35,PB.8488.2,PB.8488.9
Scaffold_575	Ppup154610	Ppup154610;A3:Scaffold_575:283009-283099:283008-283099:-	PB.8488.20	PB.8488.19,PB.8488.33,PB.8488.20,PB.8488.9,PB.8488.42,PB.8488.37,PB.8488.1,PB.8488.4,PB.8488.27,PB.8488.29,PB.8488.2,PB.8488.43,PB.8488.10,PB.8488.39,PB.8488.26,PB.8488.32,PB.8488.24,PB.8488.44,PB.8488.35,PB.8488.41
Scaffold_6	Ppup057310	Ppup057310;A3:Scaffold_6:118416-118636:118416-118639:+	PB.2431.2,PB.2431.10,PB.2431.15	PB.2431.3,PB.2431.10,PB.2431.2,PB.2431.15
Scaffold_6	novelGeneAS210	novelGeneAS210;A3:Scaffold_6:410402-410513:410402-410528:+	PB.2451.10,PB.2451.1,PB.2451.12,PB.2451.13,PB.2451.15,PB.2451.16,PB.2451.17,PB.2451.3,PB.2451.4,PB.2451.5,PB.2451.7,PB.2451.8,PB.2451.9,PB.2451.11,PB.2451.2	PB.2451.10,PB.2451.15,PB.2451.13,PB.2451.16,PB.2451.17,PB.2451.8,PB.2451.2,PB.2451.14,PB.2451.5,PB.2451.1,PB.2451.3,PB.2451.9,PB.2451.11,PB.2451.4,PB.2451.6,PB.2451.12,PB.2451.7
Scaffold_6	novelGeneAS210	novelGeneAS210;A3:Scaffold_6:411511-411589:411511-411600:+	PB.2451.1,PB.2451.12,PB.2451.13,PB.2451.14,PB.2451.16,PB.2451.17,PB.2451.3,PB.2451.4,PB.2451.5,PB.2451.6,PB.2451.8,PB.2451.9,PB.2451.11,PB.2451.2	PB.2451.13,PB.2451.14,PB.2451.16,PB.2451.17,PB.2451.8,PB.2451.7,PB.2451.5,PB.2451.1,PB.2451.3,PB.2451.9,PB.2451.11,PB.2451.4,PB.2451.6,PB.2451.12,PB.2451.2
Scaffold_6	novelGeneAS210	novelGeneAS210;A3:Scaffold_6:409645-410016:409645-410051:+	PB.2451.16	PB.2451.10,PB.2451.14,PB.2451.13,PB.2451.16,PB.2451.11,PB.2451.6,PB.2451.12,PB.2451.7
Scaffold_6	novelGeneAS210	novelGeneAS210;A3:Scaffold_6:409645-409870:409645-410051:+	PB.2451.17	PB.2451.10,PB.2451.14,PB.2451.13,PB.2451.17,PB.2451.11,PB.2451.6,PB.2451.12,PB.2451.7
Scaffold_6	novelGeneAS210	novelGeneAS210;A3:Scaffold_6:409645-409870:409645-410016:+	PB.2451.17	PB.2451.16,PB.2451.17
Scaffold_6	novelGeneAS210	novelGeneAS210;A3:Scaffold_6:409512-410016:409512-410051:+	PB.2451.8	PB.2451.8,PB.2451.9
Scaffold_6	novelGeneAS210	novelGeneAS210;A3:Scaffold_6:414304-414902:414304-414918:+	PB.2452.14	PB.2452.13,PB.2452.14
Scaffold_6	novelGeneAS210	novelGeneAS210;A3:Scaffold_6:414304-414869:414304-414918:+	PB.2452.20	PB.2452.13,PB.2452.20
Scaffold_6	novelGeneAS210	novelGeneAS210;A3:Scaffold_6:414304-414869:414304-414902:+	PB.2452.20	PB.2452.20,PB.2452.14
Scaffold_6	novelGeneAS210	novelGeneAS210;A3:Scaffold_6:414304-414785:414304-414918:+	PB.2452.27	PB.2452.27,PB.2452.13
Scaffold_6	novelGeneAS210	novelGeneAS210;A3:Scaffold_6:414304-414785:414304-414902:+	PB.2452.27	PB.2452.27,PB.2452.14
Scaffold_6	novelGeneAS210	novelGeneAS210;A3:Scaffold_6:414304-414785:414304-414869:+	PB.2452.27	PB.2452.27,PB.2452.20
Scaffold_6	Ppup057710	Ppup057710;A3:Scaffold_6:672498-672565:672498-672608:+	PB.2454.3,PB.2454.1,PB.2454.2	PB.2454.3,PB.2454.1,PB.2454.2,PB.2454.11
Scaffold_6	Ppup057710	Ppup057710;A3:Scaffold_6:672498-672546:672498-672608:+	PB.2454.6	PB.2454.11,PB.2454.6
Scaffold_6	Ppup057710	Ppup057710;A3:Scaffold_6:672498-672546:672498-672565:+	PB.2454.6	PB.2454.3,PB.2454.6,PB.2454.2,PB.2454.1
Scaffold_6	Ppup057750	Ppup057750;A3:Scaffold_6:701640-701817:701640-701835:+	PB.2458.1,PB.2458.3,PB.2458.6,PB.2458.8,PB.2458.22,PB.2458.13,PB.2458.25,PB.2458.29	PB.2458.3,PB.2458.1,PB.2458.13,PB.2458.22,PB.2458.6,PB.2458.25,PB.2458.12,PB.2458.29,PB.2458.8
Scaffold_6	Ppup057750	Ppup057750;A3:Scaffold_6:701640-701814:701640-701817:+	PB.2458.14	PB.2458.3,PB.2458.1,PB.2458.14,PB.2458.22,PB.2458.6,PB.2458.13,PB.2458.25,PB.2458.29,PB.2458.8
Scaffold_6	Ppup057750	Ppup057750;A3:Scaffold_6:701640-701814:701640-701835:+	PB.2458.14	PB.2458.14,PB.2458.12
Scaffold_6	Ppup057760	Ppup057760;A3:Scaffold_6:723330-723605:723330-723638:+	PB.2460.7,PB.2460.8,PB.2460.25,PB.2460.28	PB.2460.15,PB.2460.18,PB.2460.7,PB.2460.29,PB.2460.25,PB.2460.28,PB.2460.9,PB.2460.8
Scaffold_6	Ppup057760	Ppup057760;A3:Scaffold_6:722901-722978:722901-722984:+	PB.2460.8,PB.2460.9,PB.2460.11,PB.2460.18,PB.2460.25,PB.2460.24,PB.2460.26,PB.2460.27,PB.2460.28,PB.2460.29	PB.2460.11,PB.2460.27,PB.2460.18,PB.2460.7,PB.2460.26,PB.2460.24,PB.2460.29,PB.2460.25,PB.2460.28,PB.2460.9,PB.2460.8
Scaffold_6	Ppup057760	Ppup057760;A3:Scaffold_6:723330-723539:723330-723605:+	PB.2460.11,PB.2460.24,PB.2460.26,PB.2460.27	PB.2460.11,PB.2460.7,PB.2460.26,PB.2460.24,PB.2460.25,PB.2460.28,PB.2460.27,PB.2460.8
Scaffold_6	Ppup057760	Ppup057760;A3:Scaffold_6:723330-723539:723330-723638:+	PB.2460.11,PB.2460.24,PB.2460.26,PB.2460.27	PB.2460.11,PB.2460.15,PB.2460.18,PB.2460.26,PB.2460.24,PB.2460.9,PB.2460.29,PB.2460.27
Scaffold_6	novelGenePB.2526	novelGenePB.2526;A3:Scaffold_6:1823586-1823658:1823586-1823679:+	PB.2526.2	PB.2526.1,PB.2526.2
Scaffold_6	Ppup058780_Ppup058790	Ppup058780_Ppup058790;A3:Scaffold_6:2266463-2267625:2266463-2267643:+	PB.2533.2	PB.2533.2,PB.2533.3
Scaffold_6	Ppup058890	Ppup058890;A3:Scaffold_6:2441740-2441828:2441740-2441833:+	PB.2540.2	PB.2540.2,PB.2540.1
Scaffold_6	Ppup058980	Ppup058980;A3:Scaffold_6:2531385-2531533:2531385-2531711:+	PB.2547.1	PB.2547.2,PB.2547.1
Scaffold_6	Ppup059740	Ppup059740;A3:Scaffold_6:3680992-3681043:3680992-3681067:+	PB.2592.10	PB.2592.10,PB.2592.12,PB.2592.5,PB.2592.11,PB.2592.1,PB.2592.4
Scaffold_6	Ppup059950	Ppup059950;A3:Scaffold_6:3884020-3885306:3884020-3885318:+	PB.2611.2,PB.2611.1,PB.2611.8,PB.2611.10	PB.2611.2,PB.2611.3,PB.2611.6,PB.2611.1,PB.2611.9,PB.2611.8,PB.2611.7,PB.2611.10
Scaffold_6	Ppup060190	Ppup060190;A3:Scaffold_6:4662587-4663974:4662587-4664268:+	PB.2622.1	PB.2622.2,PB.2622.1
Scaffold_6	Ppup060380	Ppup060380;A3:Scaffold_6:5021506-5021689:5021506-5021724:+	PB.2635.1	PB.2635.1,PB.2635.2
Scaffold_6	Ppup057460	Ppup057460;A3:Scaffold_6:250172-250240:250161-250240:-	PB.2437.1,PB.2437.2,PB.2437.3,PB.2437.4	PB.2437.1,PB.2437.5,PB.2437.4,PB.2437.3,PB.2437.2
Scaffold_6	Ppup057460	Ppup057460;A3:Scaffold_6:250356-250828:250338-250828:-	PB.2437.2	PB.2437.3,PB.2437.2
Scaffold_6	Ppup057460	Ppup057460;A3:Scaffold_6:250356-250828:250326-250828:-	PB.2437.2	PB.2437.2,PB.2437.5,PB.2437.4
Scaffold_6	Ppup057460	Ppup057460;A3:Scaffold_6:250338-250828:250326-250828:-	PB.2437.3	PB.2437.3,PB.2437.5,PB.2437.4
Scaffold_6	Ppup057820	Ppup057820;A3:Scaffold_6:781072-781588:781069-781588:-	PB.2467.2,PB.2467.20,PB.2467.14	PB.2467.3,PB.2467.14,PB.2467.18,PB.2467.1,PB.2467.2,PB.2467.15,PB.2467.20,PB.2467.11,PB.2467.22
Scaffold_6	Ppup058440	Ppup058440;A3:Scaffold_6:1719649-1719730:1719628-1719730:-	PB.2511.2	PB.2511.2,PB.2511.1
Scaffold_6	Ppup058680_Ppup058690	Ppup058680_Ppup058690;A3:Scaffold_6:1866689-1866753:1866681-1866753:-	PB.2531.1	PB.2531.5,PB.2531.1
Scaffold_6	Ppup058880	Ppup058880;A3:Scaffold_6:2438945-2439361:2438930-2439361:-	PB.2539.3,PB.2539.7,PB.2539.8,PB.2539.9,PB.2539.16	PB.2539.9,PB.2539.13,PB.2539.3,PB.2539.16,PB.2539.8,PB.2539.11,PB.2539.7
Scaffold_6	Ppup059060	Ppup059060;A3:Scaffold_6:2577013-2577208:2576983-2577208:-	PB.2554.2,PB.2554.7	PB.2554.5,PB.2554.4,PB.2554.9,PB.2554.8,PB.2554.7,PB.2554.6,PB.2554.1,PB.2554.2,PB.2554.3
Scaffold_6	Ppup059100	Ppup059100;A3:Scaffold_6:2647332-2647417:2647329-2647417:-	PB.2558.2	PB.2558.2,PB.2558.1
Scaffold_6	Ppup059210	Ppup059210;A3:Scaffold_6:2704019-2704107:2704016-2704107:-	MSTRG.10041.1,MSTRG.10041.4	MSTRG.10041.4,MSTRG.10041.1,MSTRG.10041.5
Scaffold_6	Ppup059780	Ppup059780;A3:Scaffold_6:3717025-3717763:3717013-3717763:-	PB.2596.15,PB.2596.21,PB.2596.30,PB.2596.13,PB.2596.16,PB.2596.18,PB.2596.6,PB.2596.7,PB.2596.11,PB.2596.31	PB.2596.3,PB.2596.18,PB.2596.16,PB.2596.15,PB.2596.7,PB.2596.8,PB.2596.21,PB.2596.31,PB.2596.11,PB.2596.6,PB.2596.13,PB.2596.30
Scaffold_6	Ppup059780	Ppup059780;A3:Scaffold_6:3717025-3717685:3717013-3717685:-	PB.2596.25,PB.2596.29,PB.2596.24,PB.2596.5,PB.2596.36,PB.2596.34	PB.2596.34,PB.2596.36,PB.2596.10,PB.2596.24,PB.2596.14,PB.2596.20,PB.2596.5,PB.2596.29,PB.2596.25
Scaffold_6	Ppup060150	Ppup060150;A3:Scaffold_6:4590968-4591224:4590953-4591224:-	PB.2619.4,PB.2619.1	PB.2619.4,PB.2619.1,PB.2619.3
Scaffold_6	Ppup060150	Ppup060150;A3:Scaffold_6:4587260-4587709:4587239-4587709:-	PB.2619.1,PB.2619.3	PB.2619.4,PB.2619.1,PB.2619.3
Scaffold_6	Ppup060150	Ppup060150;A3:Scaffold_6:4592280-4593568:4592231-4593568:-	PB.2619.1	PB.2619.1,PB.2619.3
Scaffold_612	Ppup128890	Ppup128890;A3:Scaffold_612:20396-20457:20361-20457:-	PB.8511.4	PB.8511.4,PB.8511.5
Scaffold_63	Ppup073690	Ppup073690;A3:Scaffold_63:193753-194018:193753-194128:+	MSTRG.10221.2	MSTRG.10221.1,MSTRG.10221.2
Scaffold_631	Ppup171630	Ppup171630;A3:Scaffold_631:63869-64026:63869-64029:+	PB.8530.1,PB.8530.4	PB.8530.6,PB.8530.4,PB.8530.1
Scaffold_631	Ppup171650	Ppup171650;A3:Scaffold_631:111229-111286:111216-111286:-	PB.8531.2	PB.8531.3,PB.8531.2,PB.8531.1,PB.8531.4
Scaffold_634	Ppup036470	Ppup036470;A3:Scaffold_634:102900-103010:102876-103010:-	PB.8544.12	PB.8544.6,PB.8544.29,PB.8544.22,PB.8544.15,PB.8544.28,PB.8544.12,PB.8544.11,PB.8544.14,PB.8544.27,PB.8544.25
Scaffold_634	Ppup036470	Ppup036470;A3:Scaffold_634:100836-100912:100812-100912:-	PB.8544.14,PB.8544.20	PB.8544.14,PB.8544.20,PB.8544.15
Scaffold_64	Ppup012830	Ppup012830;A3:Scaffold_64:38910-39044:38910-39134:+	PB.6278.2	PB.6278.2,PB.6278.3
Scaffold_64	Ppup012830	Ppup012830;A3:Scaffold_64:39974-40052:39974-40073:+	PB.6278.2,PB.6278.3,PB.6278.6	PB.6278.5,PB.6278.6,PB.6278.2,PB.6278.3
Scaffold_64	Ppup013180	Ppup013180;A3:Scaffold_64:433217-433480:432916-433480:-	PB.6303.1	PB.6303.3,PB.6303.1,PB.6303.2
Scaffold_64	Ppup013200	Ppup013200;A3:Scaffold_64:442355-442535:442351-442535:-	PB.6304.1,PB.6304.3	PB.6304.4,PB.6304.1,PB.6304.3
Scaffold_658	Ppup102580	Ppup102580;A3:Scaffold_658:123956-124068:123956-124080:+	PB.8561.6,PB.8561.23	PB.8561.21,PB.8561.1,PB.8561.8,PB.8561.4,PB.8561.2,PB.8561.7,PB.8561.16,PB.8561.22,PB.8561.19,PB.8561.3,PB.8561.20,PB.8561.9,PB.8561.15,PB.8561.26,PB.8561.25,PB.8561.6,PB.8561.11,PB.8561.23
Scaffold_660	Ppup138480	Ppup138480;A3:Scaffold_660:192631-192712:192619-192712:-	MSTRG.10334.1,PB.8566.1,PB.8566.4	PB.8566.4,PB.8566.1,MSTRG.10334.1,PB.8566.2
Scaffold_67	Ppup074180	Ppup074180;A3:Scaffold_67:499327-499398:499325-499398:-	PB.6316.5	PB.6316.4,PB.6316.6,PB.6316.11,PB.6316.5,PB.6316.3,PB.6316.9
Scaffold_69	Ppup103000_Ppup102960	Ppup103000_Ppup102960;A3:Scaffold_69:538006-602980:537838-602980:-	PB.6338.1,PB.6338.2,PB.6338.3	PB.6338.3,PB.6338.2,PB.6338.4,PB.6338.1
Scaffold_7	Ppup172490	Ppup172490;A3:Scaffold_7:716631-716752:716631-717156:+	PB.2657.2	PB.2657.2,PB.2657.3
Scaffold_7	Ppup172620	Ppup172620;A3:Scaffold_7:819913-820290:819913-820293:+	MSTRG.10440.2	MSTRG.10440.2,MSTRG.10440.3
Scaffold_7	Ppup172620	Ppup172620;A3:Scaffold_7:820737-820796:820737-820810:+	MSTRG.10440.3	MSTRG.10440.2,MSTRG.10440.3
Scaffold_7	Ppup173320	Ppup173320;A3:Scaffold_7:2473295-2473600:2473295-2473612:+	PB.2700.11,PB.2700.1,PB.2700.4,PB.2700.14,PB.2700.7	PB.2700.14,PB.2700.9,PB.2700.2,PB.2700.16,PB.2700.11,PB.2700.1,PB.2700.3,PB.2700.10,PB.2700.7,PB.2700.4,PB.2700.15
Scaffold_7	Ppup173320	Ppup173320;A3:Scaffold_7:2476855-2477028:2476855-2477046:+	PB.2700.11,PB.2700.2,PB.2700.3,PB.2700.10,PB.2700.1,PB.2700.7,PB.2700.9	PB.2700.4,PB.2700.14,PB.2700.9,PB.2700.2,PB.2700.16,PB.2700.11,PB.2700.1,PB.2700.10,PB.2700.7,PB.2700.3,PB.2700.15
Scaffold_7	Ppup173320_Ppup173330	Ppup173320_Ppup173330;A3:Scaffold_7:2476855-2477028:2476855-2477046:+	PB.2700.13,PB.2700.5,PB.2700.20,PB.2700.35	PB.2700.8,PB.2700.13,PB.2700.5,PB.2700.20,PB.2700.35
Scaffold_7	Ppup173320_Ppup173330	Ppup173320_Ppup173330;A3:Scaffold_7:2473295-2473600:2473295-2473612:+	PB.2700.20	PB.2700.8,PB.2700.20,PB.2700.13,PB.2700.5
Scaffold_7	Ppup173920	Ppup173920;A3:Scaffold_7:3251862-3252132:3251862-3252138:+	PB.2748.1,PB.2748.5	PB.2748.2,PB.2748.5,PB.2748.1
Scaffold_7	Ppup174120	Ppup174120;A3:Scaffold_7:3981644-3981938:3981644-3981953:+	PB.2766.1,PB.2766.2	PB.2766.2,PB.2766.4,PB.2766.1
Scaffold_7	Ppup174390	Ppup174390;A3:Scaffold_7:4507687-4507762:4507687-4507765:+	PB.2792.2,PB.2792.1	PB.2792.2,PB.2792.1,PB.2792.3,PB.2792.4
Scaffold_7	Ppup174890	Ppup174890;A3:Scaffold_7:4989906-4997480:4989906-4997483:+	PB.2823.4	PB.2823.4,PB.2823.1
Scaffold_7	Ppup175200	Ppup175200;A3:Scaffold_7:5202246-5203960:5202246-5204128:+	PB.2846.2,PB.2846.7,PB.2846.9,PB.2846.15	PB.2846.2,PB.2846.15,PB.2846.12,PB.2846.9,PB.2846.7
Scaffold_7	Ppup175200	Ppup175200;A3:Scaffold_7:5202162-5203960:5202162-5204128:+	PB.2846.3,PB.2846.11	PB.2846.11,PB.2846.4,PB.2846.6,PB.2846.3
Scaffold_7	Ppup175200	Ppup175200;A3:Scaffold_7:5199523-5199611:5199523-5199612:+	PB.2846.8	PB.2846.13,PB.2846.2,PB.2846.11,PB.2846.14,PB.2846.5,PB.2846.4,PB.2846.6,PB.2846.3,PB.2846.15,PB.2846.12,PB.2846.9,PB.2846.7,PB.2846.8
Scaffold_7	Ppup175270	Ppup175270;A3:Scaffold_7:5255745-5255829:5255745-5255841:+	PB.2851.4,PB.2851.5,PB.2851.6,PB.2851.7	PB.2851.4,PB.2851.6,PB.2851.5,PB.2851.8,PB.2851.7
Scaffold_7	Ppup172230	Ppup172230;A3:Scaffold_7:123745-126470:123729-126470:-	PB.2643.1	PB.2643.1,PB.2643.2
Scaffold_7	Ppup173170	Ppup173170;A3:Scaffold_7:2265335-2265603:2265304-2265603:-	PB.2692.1	PB.2692.1,PB.2692.2
Scaffold_7	Ppup173200_Ppup173210	Ppup173200_Ppup173210;A3:Scaffold_7:2284881-2285270:2284833-2285270:-	PB.2696.1	PB.2696.1,PB.2696.2
Scaffold_7	Ppup173440	Ppup173440;A3:Scaffold_7:2757238-2757548:2757217-2757548:-	PB.2709.2	PB.2709.3,PB.2709.2
Scaffold_7	Ppup174190	Ppup174190;A3:Scaffold_7:4075982-4076071:4075952-4076071:-	PB.2771.1,PB.2771.2,PB.2771.4,PB.2771.6,PB.2771.8	PB.2771.6,PB.2771.3,PB.2771.1,PB.2771.7,PB.2771.8,PB.2771.2,PB.2771.4
Scaffold_7	Ppup174330	Ppup174330;A3:Scaffold_7:4284663-4285086:4284642-4285086:-	PB.2784.1	PB.2784.1,PB.2784.2
Scaffold_7	Ppup175350	Ppup175350;A3:Scaffold_7:5350108-5350832:5350049-5350832:-	PB.2856.11,PB.2856.2	PB.2856.6,PB.2856.11,PB.2856.2
Scaffold_7	Ppup175350	Ppup175350;A3:Scaffold_7:5350645-5350832:5350108-5350832:-	PB.2856.4	PB.2856.4,PB.2856.11,PB.2856.2
Scaffold_7	Ppup175350	Ppup175350;A3:Scaffold_7:5350645-5350832:5350049-5350832:-	PB.2856.4	PB.2856.6,PB.2856.4
Scaffold_70	Ppup149480	Ppup149480;A3:Scaffold_70:207793-207874:207791-207874:-	PB.6342.3	PB.6342.1,PB.6342.3,PB.6342.4
Scaffold_70	Ppup149590	Ppup149590;A3:Scaffold_70:434866-434968:434849-434968:-	MSTRG.10687.2	MSTRG.10687.2,MSTRG.10687.1
Scaffold_72	Ppup103150	Ppup103150;A3:Scaffold_72:247405-250077:247405-250078:+	PB.6365.5	PB.6365.5,PB.6365.3
Scaffold_72	Ppup103150	Ppup103150;A3:Scaffold_72:254033-254191:254033-254206:+	PB.6365.5	PB.6365.5,PB.6365.3
Scaffold_72	Ppup103160	Ppup103160;A3:Scaffold_72:266856-266989:266856-267007:+	PB.6366.6,PB.6366.11	PB.6366.6,PB.6366.1,PB.6366.9,PB.6366.10,PB.6366.11,PB.6366.7
Scaffold_72	Ppup103260	Ppup103260;A3:Scaffold_72:415818-415898:415818-415978:+	PB.6373.2	PB.6373.2,PB.6373.6,PB.6373.5,PB.6373.1,PB.6373.4
Scaffold_72	Ppup103270	Ppup103270;A3:Scaffold_72:422803-423167:422803-423188:+	PB.6374.1,PB.6374.5	PB.6374.1,PB.6374.3,PB.6374.5
Scaffold_72	Ppup103130	Ppup103130;A3:Scaffold_72:221121-221420:221118-221420:-	PB.6363.2,PB.6363.3	PB.6363.2,PB.6363.3,PB.6363.4
Scaffold_79	Ppup037560	Ppup037560;A3:Scaffold_79:882186-882759:882180-882759:-	PB.6425.1	PB.6425.2,PB.6425.4,PB.6425.1
Scaffold_79	Ppup038010	Ppup038010;A3:Scaffold_79:1382419-1382504:1382396-1382504:-	PB.6449.5	PB.6449.7,PB.6449.4,PB.6449.6,PB.6449.5
Scaffold_79	Ppup038150	Ppup038150;A3:Scaffold_79:1515790-1515836:1515773-1515836:-	PB.6453.6,PB.6453.10,PB.6453.3	PB.6453.1,PB.6453.6,PB.6453.8,PB.6453.4,PB.6453.3,PB.6453.10,PB.6453.2,PB.6453.9,PB.6453.5
Scaffold_79	Ppup038180	Ppup038180;A3:Scaffold_79:1533198-1534080:1533180-1534080:-	PB.6456.1	PB.6456.2,PB.6456.3,PB.6456.1
Scaffold_79	Ppup036920	Ppup036920;A3:Scaffold_79:262738-269034:262738-269037:+	PB.6392.1	PB.6392.1,PB.6392.2
Scaffold_79	Ppup036990	Ppup036990;A3:Scaffold_79:386818-388315:386818-388318:+	MSTRG.10772.2,MSTRG.10772.3,MSTRG.10772.6,MSTRG.10772.8	MSTRG.10772.7,MSTRG.10772.3,MSTRG.10772.1,MSTRG.10772.6,MSTRG.10772.4,MSTRG.10772.5,MSTRG.10772.8,MSTRG.10772.9,MSTRG.10772.2
Scaffold_79	Ppup037010	Ppup037010;A3:Scaffold_79:418937-419593:418937-420479:+	PB.6398.6	PB.6398.6,PB.6398.1,PB.6398.8,PB.6398.3
Scaffold_79	Ppup037330	Ppup037330;A3:Scaffold_79:622177-623507:622177-623513:+	PB.6409.4	PB.6409.3,PB.6409.4,PB.6409.14,PB.6409.7,PB.6409.16,PB.6409.15,PB.6409.13,PB.6409.6,PB.6409.8
Scaffold_79	Ppup037330	Ppup037330;A3:Scaffold_79:622177-622408:622177-623513:+	PB.6409.12	PB.6409.3,PB.6409.14,PB.6409.12,PB.6409.7,PB.6409.16,PB.6409.15,PB.6409.13,PB.6409.6,PB.6409.8
Scaffold_79	Ppup037330	Ppup037330;A3:Scaffold_79:622177-622408:622177-623507:+	PB.6409.12	PB.6409.12,PB.6409.4
Scaffold_79	Ppup037330	Ppup037330;A3:Scaffold_79:629433-631195:629433-631204:+	PB.6409.6,PB.6409.13,PB.6409.15,PB.6409.8	PB.6409.14,PB.6409.12,PB.6409.15,PB.6409.13,PB.6409.6,PB.6409.8
Scaffold_79	Ppup037330	Ppup037330;A3:Scaffold_79:631420-633490:631420-633610:+	PB.6409.15	PB.6409.15,PB.6409.8
Scaffold_79	Ppup037470	Ppup037470;A3:Scaffold_79:765531-765790:765531-765976:+	PB.6415.1	PB.6415.2,PB.6415.1,PB.6415.3
Scaffold_79	Ppup037470	Ppup037470;A3:Scaffold_79:764718-765216:764718-765288:+	PB.6415.2	PB.6415.2,PB.6415.1,PB.6415.3
Scaffold_79	Ppup038240	Ppup038240;A3:Scaffold_79:1568667-1568869:1568667-1569018:+	PB.6461.7	PB.6461.7,PB.6461.1
Scaffold_79	Ppup038270	Ppup038270;A3:Scaffold_79:1580307-1580383:1580307-1580385:+	PB.6463.1	PB.6463.3,PB.6463.1
Scaffold_79	Ppup038270	Ppup038270;A3:Scaffold_79:1581146-1581305:1581146-1581345:+	PB.6463.1	PB.6463.3,PB.6463.1
Scaffold_79	Ppup038420	Ppup038420;A3:Scaffold_79:1673103-1673442:1673103-1673478:+	PB.6472.1,PB.6472.2,PB.6472.3,PB.6472.10,PB.6472.6,PB.6472.5	PB.6472.6,PB.6472.10,PB.6472.3,PB.6472.5,PB.6472.2,PB.6472.9,PB.6472.15,PB.6472.1
Scaffold_79	Ppup038450	Ppup038450;A3:Scaffold_79:1743971-1745852:1743971-1745855:+	PB.6473.4	PB.6473.4,PB.6473.1
Scaffold_79	Ppup038450	Ppup038450;A3:Scaffold_79:1743971-1745831:1743971-1745852:+	PB.6473.2	PB.6473.4,PB.6473.2
Scaffold_79	Ppup038450	Ppup038450;A3:Scaffold_79:1743971-1745831:1743971-1745855:+	PB.6473.2	PB.6473.1,PB.6473.2
Scaffold_8	Ppup090540	Ppup090540;A3:Scaffold_8:740984-741081:740984-741111:+	PB.2877.1,PB.2877.3,PB.2877.5,PB.2877.6,PB.2877.7,PB.2877.9	PB.2877.5,PB.2877.4,PB.2877.6,PB.2877.1,PB.2877.3,PB.2877.11,PB.2877.7,PB.2877.9
Scaffold_8	Ppup090820	Ppup090820;A3:Scaffold_8:909286-909472:909286-910142:+	PB.2899.2	PB.2899.6,PB.2899.2,PB.2899.5
Scaffold_8	Ppup091320	Ppup091320;A3:Scaffold_8:1290354-1290418:1290354-1290436:+	PB.2939.1	PB.2939.1,PB.2939.2
Scaffold_8	novelGeneAS238	novelGeneAS238;A3:Scaffold_8:2008185-2008256:2008185-2008286:+	PB.2998.2	PB.2998.1,PB.2998.2,PB.2998.3
Scaffold_8	Ppup092640	Ppup092640;A3:Scaffold_8:2306442-2306533:2306442-2306549:+	MSTRGCarcass.10231.1	MSTRGCarcass.10231.2,MSTRGCarcass.10231.1
Scaffold_8	Ppup092910	Ppup092910;A3:Scaffold_8:2693139-2694321:2693139-2694336:+	PB.3048.3	PB.3048.3,PB.3048.5,PB.3048.2
Scaffold_8	Ppup092930	Ppup092930;A3:Scaffold_8:2721714-2723170:2721714-2724103:+	MSTRG.11098.2,MSTRG.11098.3	MSTRG.11098.1,MSTRG.11098.3,MSTRG.11098.2
Scaffold_8	Ppup093430_Ppup093440	Ppup093430_Ppup093440;A3:Scaffold_8:3352455-3352522:3352455-3352596:+	PB.3082.1	PB.3082.7,PB.3082.1,PB.3082.4,PB.3082.3,PB.3082.6
Scaffold_8	Ppup093500	Ppup093500;A3:Scaffold_8:3368856-3369206:3368856-3369268:+	PB.3093.5	PB.3093.5,PB.3093.6,PB.3093.4,PB.3093.3
Scaffold_8	Ppup093500	Ppup093500;A3:Scaffold_8:3369089-3369206:3369089-3369268:+	PB.3093.8	PB.3093.1,PB.3093.8
Scaffold_8	Ppup093660	Ppup093660;A3:Scaffold_8:3467621-3467696:3467621-3467720:+	PB.3108.2	PB.3108.3,PB.3108.2,PB.3108.1
Scaffold_8	Ppup094010	Ppup094010;A3:Scaffold_8:3848916-3855269:3848916-3855275:+	PB.3115.4	PB.3115.4,PB.3115.2
Scaffold_8	Ppup094290	Ppup094290;A3:Scaffold_8:4067171-4067271:4067171-4067342:+	PB.3126.5,PB.3126.9	PB.3126.5,PB.3126.9,PB.3126.11
Scaffold_8	Ppup094290	Ppup094290;A3:Scaffold_8:4067171-4067271:4067171-4067335:+	PB.3126.5,PB.3126.9	PB.3126.5,PB.3126.2,PB.3126.9
Scaffold_8	Ppup094290	Ppup094290;A3:Scaffold_8:4067171-4067271:4067171-4067821:+	PB.3126.9	PB.3126.9,PB.3126.13
Scaffold_8	Ppup094290	Ppup094290;A3:Scaffold_8:4067171-4067335:4067171-4067342:+	PB.3126.2	PB.3126.2,PB.3126.11
Scaffold_8	Ppup094490	Ppup094490;A3:Scaffold_8:4334797-4334868:4334797-4334913:+	MSTRG.11220.1	MSTRG.11220.2,MSTRG.11220.1
Scaffold_8	Ppup094510	Ppup094510;A3:Scaffold_8:4345714-4346246:4345714-4346291:+	PB.3137.12,PB.3137.10	PB.3137.13,PB.3137.12,PB.3137.10
Scaffold_8	Ppup094510	Ppup094510;A3:Scaffold_8:4345714-4346246:4345714-4346348:+	PB.3137.12,PB.3137.10	PB.3137.9,PB.3137.12,PB.3137.10,PB.3137.14
Scaffold_8	Ppup094510	Ppup094510;A3:Scaffold_8:4345714-4346291:4345714-4346348:+	PB.3137.13	PB.3137.9,PB.3137.13,PB.3137.14
Scaffold_8	Ppup094560	Ppup094560;A3:Scaffold_8:4374076-4374138:4374076-4374147:+	PB.3147.2,PB.3147.1,PB.3147.4	PB.3147.3,PB.3147.2,PB.3147.1,PB.3147.4
Scaffold_8	Ppup094770	Ppup094770;A3:Scaffold_8:4448952-4449012:4448952-4449030:+	PB.3166.1,PB.3166.8,PB.3166.7,PB.3166.2	PB.3166.1,PB.3166.2,PB.3166.7,PB.3166.3,PB.3166.5,PB.3166.8,PB.3166.4
Scaffold_8	Ppup094800	Ppup094800;A3:Scaffold_8:4471360-4471641:4471360-4471737:+	PB.3168.5	PB.3168.5,PB.3168.6
Scaffold_8	Ppup095170	Ppup095170;A3:Scaffold_8:4995722-4995800:4995722-4995803:+	PB.3192.1	PB.3192.1,PB.3192.3
Scaffold_8	Ppup095200	Ppup095200;A3:Scaffold_8:5011411-5012170:5011411-5012173:+	PB.3194.6,PB.3194.7	PB.3194.7,PB.3194.2,PB.3194.1,PB.3194.4,PB.3194.6
Scaffold_8	Ppup095200	Ppup095200;A3:Scaffold_8:5042207-5042295:5042207-5042298:+	PB.3194.2,PB.3194.10,PB.3194.12,PB.3194.15,PB.3194.18	PB.3194.12,PB.3194.2,PB.3194.15,PB.3194.18,PB.3194.4,PB.3194.10,PB.3194.14
Scaffold_8	Ppup095370	Ppup095370;A3:Scaffold_8:5178267-5178384:5178267-5178402:+	PB.3205.11,PB.3205.4,PB.3205.9,PB.3205.8,PB.3205.14,PB.3205.17,PB.3205.18,PB.3205.22,PB.3205.30,PB.3205.19,PB.3205.28,PB.3205.32,PB.3205.37,PB.3205.38,PB.3205.35,PB.3205.46,PB.3205.48,PB.3205.49	PB.3205.35,PB.3205.36,PB.3205.21,PB.3205.43,PB.3205.47,PB.3205.32,PB.3205.37,PB.3205.24,PB.3205.52,PB.3205.10,PB.3205.7,PB.3205.11,PB.3205.3,PB.3205.25,PB.3205.16,PB.3205.18,PB.3205.44,PB.3205.27,PB.3205.30,PB.3205.19,PB.3205.40,PB.3205.5,PB.3205.14,PB.3205.48,PB.3205.49,PB.3205.51,PB.3205.41,PB.3205.2,PB.3205.17,PB.3205.22,PB.3205.9,PB.3205.1,PB.3205.4,PB.3205.50,PB.3205.46,PB.3205.20,PB.3205.8,…
Scaffold_8	Ppup095370	Ppup095370;A3:Scaffold_8:5178267-5178384:5178267-5178387:+	PB.3205.11,PB.3205.4,PB.3205.9,PB.3205.8,PB.3205.14,PB.3205.17,PB.3205.18,PB.3205.22,PB.3205.30,PB.3205.19,PB.3205.28,PB.3205.32,PB.3205.37,PB.3205.38,PB.3205.35,PB.3205.46,PB.3205.48,PB.3205.49	PB.3205.35,PB.3205.23,PB.3205.42,PB.3205.6,PB.3205.32,PB.3205.37,PB.3205.11,PB.3205.18,PB.3205.45,PB.3205.30,PB.3205.19,PB.3205.14,PB.3205.48,PB.3205.49,PB.3205.26,PB.3205.17,PB.3205.53,PB.3205.22,PB.3205.9,PB.3205.4,PB.3205.46,PB.3205.8,PB.3205.28,PB.3205.38,PB.3205.33
Scaffold_8	Ppup095370	Ppup095370;A3:Scaffold_8:5158660-5164286:5158660-5164301:+	PB.3205.12,PB.3205.4,PB.3205.2,PB.3205.3,PB.3205.6,PB.3205.18,PB.3205.29,PB.3205.20,PB.3205.32,PB.3205.37,PB.3205.40,PB.3205.44	PB.3205.35,PB.3205.36,PB.3205.21,PB.3205.23,PB.3205.42,PB.3205.6,PB.3205.43,PB.3205.32,PB.3205.37,PB.3205.24,PB.3205.10,PB.3205.7,PB.3205.3,PB.3205.11,PB.3205.25,PB.3205.16,PB.3205.18,PB.3205.44,PB.3205.27,PB.3205.40,PB.3205.30,PB.3205.19,PB.3205.5,PB.3205.14,PB.3205.41,PB.3205.2,PB.3205.26,PB.3205.17,PB.3205.22,PB.3205.1,PB.3205.9,PB.3205.4,PB.3205.20,PB.3205.8,PB.3205.12,PB.3205.39,PB.3205.28,P…
Scaffold_8	Ppup095370	Ppup095370;A3:Scaffold_8:5178267-5178387:5178267-5178402:+	PB.3205.6,PB.3205.23,PB.3205.26,PB.3205.42,PB.3205.33,PB.3205.45,PB.3205.53	PB.3205.36,PB.3205.21,PB.3205.42,PB.3205.23,PB.3205.6,PB.3205.43,PB.3205.47,PB.3205.24,PB.3205.52,PB.3205.10,PB.3205.7,PB.3205.3,PB.3205.25,PB.3205.16,PB.3205.44,PB.3205.45,PB.3205.27,PB.3205.40,PB.3205.5,PB.3205.51,PB.3205.41,PB.3205.2,PB.3205.26,PB.3205.53,PB.3205.1,PB.3205.50,PB.3205.20,PB.3205.12,PB.3205.39,PB.3205.29,PB.3205.33
Scaffold_8	Ppup095530	Ppup095530;A3:Scaffold_8:5258374-5258895:5258374-5258928:+	PB.3216.2	PB.3216.3,PB.3216.2,PB.3216.1
Scaffold_8	Ppup095640	Ppup095640;A3:Scaffold_8:5343892-5344561:5343892-5345871:+	PB.3223.13	PB.3223.26,PB.3223.18,PB.3223.13
Scaffold_8	Ppup095730_Ppup095740	Ppup095730_Ppup095740;A3:Scaffold_8:5429320-5429514:5429320-5429538:+	PB.3231.3	PB.3231.3,PB.3231.4
Scaffold_8	Ppup095740	Ppup095740;A3:Scaffold_8:5429320-5429514:5429320-5429538:+	PB.3231.8,PB.3231.11,PB.3231.6,PB.3231.18,PB.3231.22	PB.3231.21,PB.3231.14,PB.3231.22,PB.3231.11,PB.3231.12,PB.3231.18,PB.3231.20,PB.3231.6,PB.3231.9,PB.3231.8
Scaffold_8	Ppup095790	Ppup095790;A3:Scaffold_8:5464243-5465656:5464243-5465929:+	PB.3237.11,PB.3237.4	PB.3237.8,PB.3237.4,PB.3237.11,PB.3237.10
Scaffold_8	Ppup095790	Ppup095790;A3:Scaffold_8:5464243-5464813:5464243-5465656:+	PB.3237.3,PB.3237.2,PB.3237.5	PB.3237.2,PB.3237.4,PB.3237.3,PB.3237.11,PB.3237.5
Scaffold_8	Ppup095790	Ppup095790;A3:Scaffold_8:5464243-5464813:5464243-5465929:+	PB.3237.3,PB.3237.2,PB.3237.5	PB.3237.2,PB.3237.3,PB.3237.10,PB.3237.5,PB.3237.8
Scaffold_8	Ppup095890	Ppup095890;A3:Scaffold_8:5551038-5551141:5551038-5551340:+	PB.3248.2	PB.3248.1,PB.3248.2
Scaffold_8	Ppup096010	Ppup096010;A3:Scaffold_8:5742425-5742506:5742425-5742509:+	MSTRG.11359.1	MSTRG.11359.1,MSTRG.11359.2
Scaffold_8	Ppup096030_Ppup096020	Ppup096030_Ppup096020;A3:Scaffold_8:5950496-5950983:5950496-5950986:+	PB.3260.5,PB.3260.6	PB.3260.5,PB.3260.6,PB.3260.2,PB.3260.7
Scaffold_8	Ppup096030_Ppup096020	Ppup096030_Ppup096020;A3:Scaffold_8:5960977-5962053:5960977-5962056:+	PB.3260.5,PB.3260.6	PB.3260.5,PB.3260.6,PB.3260.7
Scaffold_8	Ppup090780	Ppup090780;A3:Scaffold_8:882279-883897:882133-883897:-	PB.2895.1	PB.2895.2,PB.2895.1
Scaffold_8	Ppup090990	Ppup090990;A3:Scaffold_8:1043824-1043904:1043821-1043904:-	PB.2914.2,PB.2914.4,PB.2914.5,PB.2914.6,PB.2914.21,PB.2914.13,PB.2914.14,PB.2914.15,PB.2914.17,PB.2914.18,PB.2914.20,PB.2914.22	PB.2914.15,PB.2914.6,PB.2914.21,PB.2914.22,PB.2914.5,PB.2914.14,PB.2914.20,PB.2914.11,PB.2914.17,PB.2914.4,PB.2914.18,PB.2914.2,PB.2914.13
Scaffold_8	Ppup090990	Ppup090990;A3:Scaffold_8:1044520-1045444:1044517-1045444:-	PB.2914.2,PB.2914.5,PB.2914.6,PB.2914.11,PB.2914.15	PB.2914.15,PB.2914.6,PB.2914.5,PB.2914.11,PB.2914.17,PB.2914.2
Scaffold_8	Ppup091190	Ppup091190;A3:Scaffold_8:1179878-1179953:1179794-1179953:-	PB.2929.1,PB.2929.4,PB.2929.9,PB.2929.10	PB.2929.5,PB.2929.10,PB.2929.1,PB.2929.11,PB.2929.9,PB.2929.4
Scaffold_8	Ppup091760	Ppup091760;A3:Scaffold_8:1517516-1523142:1517514-1523142:-	PB.2962.10	PB.2962.26,PB.2962.27,PB.2962.10,PB.2962.7,PB.2962.4,PB.2962.28,PB.2962.6
Scaffold_8	Ppup091760	Ppup091760;A3:Scaffold_8:1525508-1570978:1525505-1570978:-	PB.2962.10,PB.2962.9	PB.2962.9,PB.2962.10,PB.2962.27,PB.2962.28
Scaffold_8	Ppup091760	Ppup091760;A3:Scaffold_8:1517520-1523142:1517514-1523142:-	PB.2962.9	PB.2962.26,PB.2962.27,PB.2962.9,PB.2962.7,PB.2962.4,PB.2962.28,PB.2962.6
Scaffold_8	Ppup091760	Ppup091760;A3:Scaffold_8:1517520-1523142:1517516-1523142:-	PB.2962.9	PB.2962.9,PB.2962.10
Scaffold_8	Ppup091800_Ppup091810	Ppup091800_Ppup091810;A3:Scaffold_8:1591495-1591566:1591483-1591566:-	PB.2969.4	PB.2969.2,PB.2969.4
Scaffold_8	Ppup091930	Ppup091930;A3:Scaffold_8:1790025-1790116:1790013-1790116:-	PB.2977.7	PB.2977.1,PB.2977.7
Scaffold_8	Ppup091930	Ppup091930;A3:Scaffold_8:1790025-1790116:1790022-1790116:-	PB.2977.7	PB.2977.7,PB.2977.29,PB.2977.11
Scaffold_8	Ppup091930	Ppup091930;A3:Scaffold_8:1790022-1790116:1790013-1790116:-	PB.2977.11,PB.2977.29	PB.2977.1,PB.2977.29,PB.2977.11
Scaffold_8	Ppup091960	Ppup091960;A3:Scaffold_8:1809308-1811684:1809302-1811684:-	PB.2980.2	PB.2980.6,PB.2980.2,PB.2980.1
Scaffold_8	novelGeneAS239	novelGeneAS239;A3:Scaffold_8:2516013-2516096:2515998-2516096:-	PB.3045.2	PB.3045.1,PB.3045.2
Scaffold_8	Ppup093230	Ppup093230;A3:Scaffold_8:3171219-3171794:3171207-3171794:-	PB.3073.2,PB.3073.7,PB.3073.15,PB.3073.27,PB.3073.32,PB.3073.33,PB.3073.37,PB.3073.40,PB.3073.41	PB.3073.41,PB.3073.15,PB.3073.42,PB.3073.32,PB.3073.27,PB.3073.3,PB.3073.34,PB.3073.2,PB.3073.13,PB.3073.37,PB.3073.8,PB.3073.40,PB.3073.29,PB.3073.36,PB.3073.33,PB.3073.7,PB.3073.25,PB.3073.39,PB.3073.5
Scaffold_8	Ppup093230	Ppup093230;A3:Scaffold_8:3171235-3171794:3171219-3171794:-	PB.3073.30	PB.3073.41,PB.3073.37,PB.3073.33,PB.3073.7,PB.3073.2,PB.3073.15,PB.3073.30,PB.3073.40,PB.3073.32,PB.3073.27
Scaffold_8	Ppup093230	Ppup093230;A3:Scaffold_8:3171235-3171794:3171207-3171794:-	PB.3073.30	PB.3073.36,PB.3073.8,PB.3073.34,PB.3073.13,PB.3073.30,PB.3073.25,PB.3073.29,PB.3073.42,PB.3073.39,PB.3073.5,PB.3073.3
Scaffold_8	Ppup093320	Ppup093320;A3:Scaffold_8:3218280-3218893:3218277-3218893:-	PB.3079.1,PB.3079.10,PB.3079.7,PB.3079.9,PB.3079.2,PB.3079.3,PB.3079.4	PB.3079.1,PB.3079.6,PB.3079.7,PB.3079.4,PB.3079.3,PB.3079.10,PB.3079.2,PB.3079.9
Scaffold_8	Ppup093320	Ppup093320;A3:Scaffold_8:3217398-3217507:3217377-3217507:-	PB.3079.7,PB.3079.4	PB.3079.3,PB.3079.1,PB.3079.6,PB.3079.7,PB.3079.4,PB.3079.10,PB.3079.2,PB.3079.9
Scaffold_8	Ppup093320	Ppup093320;A3:Scaffold_8:3214410-3216302:3214397-3216302:-	PB.3079.6	PB.3079.1,PB.3079.6,PB.3079.7,PB.3079.4,PB.3079.10,PB.3079.2,PB.3079.9
Scaffold_8	Ppup093630	Ppup093630;A3:Scaffold_8:3441600-3442727:3441559-3442727:-	PB.3106.1,PB.3106.8	PB.3106.8,PB.3106.1,PB.3106.3
Scaffold_8	Ppup093630	Ppup093630;A3:Scaffold_8:3441612-3443668:3441600-3443668:-	PB.3106.4	PB.3106.4,PB.3106.6
Scaffold_8	Ppup093630	Ppup093630;A3:Scaffold_8:3441612-3442727:3441600-3442727:-	PB.3106.5,PB.3106.7	PB.3106.8,PB.3106.7,PB.3106.1,PB.3106.5
Scaffold_8	Ppup093630	Ppup093630;A3:Scaffold_8:3441612-3442727:3441559-3442727:-	PB.3106.5,PB.3106.7	PB.3106.7,PB.3106.3,PB.3106.5
Scaffold_8	Ppup093840	Ppup093840;A3:Scaffold_8:3533439-3533667:3533415-3533667:-	PB.3109.2	PB.3109.1,PB.3109.4,PB.3109.2
Scaffold_8	Ppup093870_Ppup093880	Ppup093870_Ppup093880;A3:Scaffold_8:3563455-3564348:3562920-3564348:-	PB.3112.5	PB.3112.5,PB.3112.3,PB.3112.2,PB.3112.1,PB.3112.6
Scaffold_8	Ppup094280	Ppup094280;A3:Scaffold_8:4056448-4056517:4056424-4056517:-	PB.3125.1	PB.3125.1,PB.3125.2
Scaffold_8	Ppup094610	Ppup094610;A3:Scaffold_8:4392793-4392871:4392754-4392871:-	PB.3152.2,PB.3152.14	PB.3152.2,PB.3152.1,PB.3152.10,PB.3152.15,PB.3152.14,PB.3152.7
Scaffold_8	Ppup094610	Ppup094610;A3:Scaffold_8:4392793-4392871:4392782-4392871:-	PB.3152.2,PB.3152.14	PB.3152.2,PB.3152.6,PB.3152.3,PB.3152.13,PB.3152.14
Scaffold_8	Ppup094610	Ppup094610;A3:Scaffold_8:4392782-4392871:4392754-4392871:-	PB.3152.3,PB.3152.6,PB.3152.13	PB.3152.6,PB.3152.1,PB.3152.3,PB.3152.15,PB.3152.13,PB.3152.10,PB.3152.7
Scaffold_8	Ppup094670	Ppup094670;A3:Scaffold_8:4422129-4422214:4422100-4422214:-	PB.3157.2	PB.3157.2,PB.3157.3
Scaffold_8	Ppup094820	Ppup094820;A3:Scaffold_8:4481492-4481864:4481477-4481864:-	PB.3170.1,PB.3170.16,PB.3170.12,PB.3170.11,PB.3170.3,PB.3170.5,PB.3170.7,PB.3170.19	PB.3170.1,PB.3170.3,PB.3170.12,PB.3170.16,PB.3170.19,PB.3170.2,PB.3170.6,PB.3170.8,PB.3170.11,PB.3170.4,PB.3170.10,PB.3170.7,PB.3170.5
Scaffold_8	Ppup095000	Ppup095000;A3:Scaffold_8:4549938-4550015:4549936-4550015:-	PB.3179.1,PB.3179.2,PB.3179.4,PB.3179.6,PB.3179.5,PB.3179.7	PB.3179.7,PB.3179.5,PB.3179.1,PB.3179.3,PB.3179.6,PB.3179.2,PB.3179.4
Scaffold_8	Ppup095000	Ppup095000;A3:Scaffold_8:4548365-4548492:4548345-4548492:-	PB.3179.2,PB.3179.3,PB.3179.4,PB.3179.5	PB.3179.7,PB.3179.5,PB.3179.1,PB.3179.3,PB.3179.6,PB.3179.2,PB.3179.4
Scaffold_8	Ppup095010	Ppup095010;A3:Scaffold_8:4568853-4569184:4568835-4569184:-	PB.3181.1,PB.3181.9,PB.3181.8,PB.3181.12,PB.3181.14	PB.3181.8,PB.3181.3,PB.3181.1,PB.3181.13,PB.3181.14,PB.3181.12,PB.3181.10,PB.3181.9,PB.3181.11,PB.3181.2
Scaffold_8	Ppup095010	Ppup095010;A3:Scaffold_8:4567366-4568263:4567285-4568263:-	PB.3181.3,PB.3181.10,PB.3181.9	PB.3181.8,PB.3181.3,PB.3181.1,PB.3181.12,PB.3181.10,PB.3181.9,PB.3181.11,PB.3181.2
Scaffold_8	Ppup095040_Ppup095030	Ppup095040_Ppup095030;A3:Scaffold_8:4594101-4594386:4594079-4594386:-	PB.3184.3	PB.3184.2,PB.3184.3
Scaffold_8	Ppup095760	Ppup095760;A3:Scaffold_8:5445238-5445350:5445141-5445350:-	PB.3233.1,PB.3233.5	PB.3233.5,PB.3233.9,PB.3233.1
Scaffold_82	Ppup175640	Ppup175640;A3:Scaffold_82:122839-122924:122839-122942:+	PB.6485.1	PB.6485.5,PB.6485.1
Scaffold_82	Ppup175640	Ppup175640;A3:Scaffold_82:124912-125027:124912-125045:+	PB.6485.1,PB.6485.3,PB.6485.5	PB.6485.6,PB.6485.3,PB.6485.1,PB.6485.5
Scaffold_82	Ppup175850	Ppup175850;A3:Scaffold_82:375097-375537:375097-375659:+	MSTRG.11417.2	MSTRG.11417.1,MSTRG.11417.2
Scaffold_9	Ppup038890	Ppup038890;A3:Scaffold_9:75803-77975:75803-78011:+	PB.3275.2,PB.3275.3	PB.3275.2,PB.3275.1,PB.3275.6,PB.3275.4,PB.3275.3
Scaffold_9	Ppup039020_Ppup039040_Ppup039030	Ppup039020_Ppup039040_Ppup039030;A3:Scaffold_9:474184-474797:474184-474803:+	PB.3287.2,PB.3287.1,PB.3287.7,PB.3287.3,PB.3287.4,PB.3287.5	PB.3287.2,PB.3287.8,PB.3287.5,PB.3287.1,PB.3287.7,PB.3287.4,PB.3287.3
Scaffold_9	Ppup039020_Ppup039040_Ppup039030	Ppup039020_Ppup039040_Ppup039030;A3:Scaffold_9:461251-461574:461251-461805:+	PB.3287.4	PB.3287.2,PB.3287.8,PB.3287.1,PB.3287.7,PB.3287.4,PB.3287.3
Scaffold_9	Ppup039310	Ppup039310;A3:Scaffold_9:765926-766653:765926-766671:+	PB.3303.5,PB.3303.7	PB.3303.4,PB.3303.5,PB.3303.12,PB.3303.7
Scaffold_9	Ppup039430	Ppup039430;A3:Scaffold_9:1433245-1433321:1433245-1433370:+	PB.3313.1,PB.3313.3,PB.3313.4	PB.3313.1,PB.3313.2,PB.3313.4,PB.3313.3
Scaffold_9	novelGeneMSTRG.11577	novelGeneMSTRG.11577;A3:Scaffold_9:1973496-1973556:1973496-1973561:+	MSTRG.11577.2	MSTRG.11577.1,MSTRG.11577.2
Scaffold_9	Ppup039960	Ppup039960;A3:Scaffold_9:2191543-2191601:2191543-2191637:+	PB.3346.2,PB.3346.5,PB.3346.8,PB.3346.4	PB.3346.4,PB.3346.8,PB.3346.2,PB.3346.5,PB.3346.10
Scaffold_9	Ppup039960	Ppup039960;A3:Scaffold_9:2191543-2191601:2191543-2191625:+	PB.3346.2,PB.3346.5,PB.3346.8,PB.3346.4	PB.3346.4,PB.3346.8,PB.3346.2,PB.3346.5,PB.3346.6
Scaffold_9	Ppup039960	Ppup039960;A3:Scaffold_9:2191543-2191625:2191543-2191637:+	PB.3346.6	PB.3346.6,PB.3346.10
Scaffold_9	Ppup040260	Ppup040260;A3:Scaffold_9:2360235-2360578:2360235-2360581:+	MSTRG.11599.2	MSTRG.11599.2,MSTRG.11599.1
Scaffold_9	Ppup040860	Ppup040860;A3:Scaffold_9:2977249-2987977:2977249-2988072:+	PB.3410.1	PB.3410.2,PB.3410.1
Scaffold_9	Ppup040870	Ppup040870;A3:Scaffold_9:2992238-2992618:2992238-2992875:+	PB.3413.5	PB.3413.5,PB.3413.1
Scaffold_9	novelGenePB.3426	novelGenePB.3426;A3:Scaffold_9:3633235-3633399:3633235-3633444:+	PB.3426.5	PB.3426.5,PB.3426.4,PB.3426.1,PB.3426.2,PB.3426.6
Scaffold_9	novelGeneMSTRG.11521	novelGeneMSTRG.11521;A3:Scaffold_9:909656-910356:909642-910356:-	MSTRG.11521.4	MSTRG.11521.3,MSTRG.11521.4
Scaffold_9	Ppup039380	Ppup039380;A3:Scaffold_9:1087783-1178181:1087778-1178181:-	MSTRG.11531.5,MSTRG.11531.3,MSTRG.11531.2	MSTRG.11531.3,MSTRG.11531.1,MSTRG.11531.5,MSTRG.11531.6,MSTRG.11531.2
Scaffold_9	Ppup039620	Ppup039620;A3:Scaffold_9:1541947-1542008:1541944-1542008:-	PB.3326.1,PB.3326.3,PB.3326.4	PB.3326.1,PB.3326.2,PB.3326.4,PB.3326.3
Scaffold_9	Ppup039620	Ppup039620;A3:Scaffold_9:1545365-1545436:1545356-1545436:-	PB.3326.1,PB.3326.2,PB.3326.3,PB.3326.5	PB.3326.3,PB.3326.5,PB.3326.1,PB.3326.4,PB.3326.2
Scaffold_9	Ppup039740	Ppup039740;A3:Scaffold_9:1630431-1630574:1630397-1630574:-	PB.3338.1,PB.3338.3	PB.3338.3,PB.3338.4,PB.3338.1
Scaffold_9	Ppup041290	Ppup041290;A3:Scaffold_9:4149535-4154366:4149517-4154366:-	PB.3437.2	PB.3437.1,PB.3437.2
Scaffold_9	Ppup041520	Ppup041520;A3:Scaffold_9:4432754-4444653:4432661-4444653:-	PB.3453.29	PB.3453.30,PB.3453.29,PB.3453.27,PB.3453.32
Scaffold_91	Ppup176080	Ppup176080;A3:Scaffold_91:75992-76071:75992-76083:+	PB.6518.1,PB.6518.3,PB.6518.5	PB.6518.2,PB.6518.1,PB.6518.5,PB.6518.3
Scaffold_91	Ppup176080	Ppup176080;A3:Scaffold_91:76157-76234:76157-76258:+	PB.6518.3,PB.6518.4	PB.6518.6,PB.6518.1,PB.6518.5,PB.6518.2,PB.6518.3,PB.6518.7,PB.6518.4
Scaffold_91	Ppup176080	Ppup176080;A3:Scaffold_91:76526-76579:76526-76597:+	PB.6518.3	PB.6518.6,PB.6518.1,PB.6518.5,PB.6518.2,PB.6518.3,PB.6518.7,PB.6518.4
Scaffold_91	Ppup176230_Ppup176240	Ppup176230_Ppup176240;A3:Scaffold_91:692442-696805:692442-696808:+	PB.6525.1,PB.6525.5	PB.6525.5,PB.6525.2,PB.6525.1
Scaffold_91	Ppup176450	Ppup176450;A3:Scaffold_91:1050578-1050890:1050578-1051055:+	PB.6545.14,PB.6545.16,PB.6545.18,PB.6545.19,PB.6545.9,PB.6545.10,PB.6545.12,PB.6545.13,PB.6545.3,PB.6545.4,PB.6545.8,PB.6545.1,PB.6545.11,PB.6545.2,PB.6545.6,PB.6545.7	PB.6545.13,PB.6545.2,PB.6545.3,PB.6545.19,PB.6545.1,PB.6545.7,PB.6545.11,PB.6545.16,PB.6545.8,PB.6545.17,PB.6545.12,PB.6545.10,PB.6545.14,PB.6545.4,PB.6545.15,PB.6545.9,PB.6545.18,PB.6545.6
Scaffold_91	Ppup176160	Ppup176160;A3:Scaffold_91:312120-312197:312074-312197:-	PB.6522.1,PB.6522.3,PB.6522.4	PB.6522.3,PB.6522.6,PB.6522.4,PB.6522.1
Scaffold_91	Ppup176270	Ppup176270;A3:Scaffold_91:857566-860040:857218-860040:-	PB.6531.12,PB.6531.26	PB.6531.26,PB.6531.1,PB.6531.12,PB.6531.28
Scaffold_91	Ppup176390	Ppup176390;A3:Scaffold_91:982252-986543:982243-986543:-	PB.6540.5	PB.6540.2,PB.6540.4,PB.6540.3,PB.6540.5
Scaffold_92	Ppup013940	Ppup013940;A3:Scaffold_92:591243-591325:591240-591325:-	PB.6550.4	PB.6550.4,PB.6550.3
Scaffold_92	Ppup014350_Ppup014340	Ppup014350_Ppup014340;A3:Scaffold_92:909655-909734:909643-909734:-	PB.6582.10	PB.6582.10,PB.6582.5
Scaffold_92	Ppup014360	Ppup014360;A3:Scaffold_92:917232-917299:917217-917299:-	PB.6583.1,PB.6583.3	PB.6583.5,PB.6583.4,PB.6583.3,PB.6583.1,PB.6583.2
Scaffold_92	Ppup014110	Ppup014110;A3:Scaffold_92:694663-694906:694663-694927:+	PB.6561.3,PB.6561.6,PB.6561.7	PB.6561.10,PB.6561.1,PB.6561.6,PB.6561.9,PB.6561.7,PB.6561.8,PB.6561.3,PB.6561.4
Scaffold_92	Ppup014330	Ppup014330;A3:Scaffold_92:901599-901967:901599-901970:+	PB.6581.2,PB.6581.3,PB.6581.4,PB.6581.1,PB.6581.6,PB.6581.11,PB.6581.14,PB.6581.18,PB.6581.13,PB.6581.8,PB.6581.10,PB.6581.15,PB.6581.19,PB.6581.9	PB.6581.2,PB.6581.19,PB.6581.16,PB.6581.15,PB.6581.14,PB.6581.10,PB.6581.4,PB.6581.8,PB.6581.3,PB.6581.18,PB.6581.6,PB.6581.1,PB.6581.13,PB.6581.9,PB.6581.5,PB.6581.7,PB.6581.11
Scaffold_92	Ppup014330	Ppup014330;A3:Scaffold_92:900358-901099:900358-901105:+	PB.6581.5	PB.6581.2,PB.6581.14,PB.6581.1,PB.6581.5,PB.6581.13,PB.6581.7
Scaffold_92	Ppup014330	Ppup014330;A3:Scaffold_92:900358-901099:900358-901103:+	PB.6581.5	PB.6581.11,PB.6581.5
Scaffold_92	Ppup014330	Ppup014330;A3:Scaffold_92:900358-901103:900358-901105:+	PB.6581.11	PB.6581.2,PB.6581.14,PB.6581.1,PB.6581.13,PB.6581.7,PB.6581.11
Scaffold_94	Ppup029460	Ppup029460;A3:Scaffold_94:797321-797398:797306-797398:-	PB.6604.2	PB.6604.1,PB.6604.2
Scaffold_98	Ppup079810_Ppup079800	Ppup079810_Ppup079800;A3:Scaffold_98:97864-98327:97855-98327:-	PB.6614.15	PB.6614.15,PB.6614.11
Scaffold_98	Ppup079920	Ppup079920;A3:Scaffold_98:303758-303844:303740-303844:-	PB.6620.2	PB.6620.2,PB.6620.1
Scaffold_98	Ppup079940	Ppup079940;A3:Scaffold_98:346386-346657:346383-346657:-	MSTRG.11884.2	MSTRG.11884.1,MSTRG.11884.2
Scaffold_98	Ppup079870	Ppup079870;A3:Scaffold_98:260133-260370:260133-260389:+	PB.6615.10,PB.6615.3,PB.6615.6,PB.6615.9	PB.6615.1,PB.6615.6,PB.6615.9,PB.6615.10,PB.6615.5,PB.6615.3
Scaffold_98	Ppup079870	Ppup079870;A3:Scaffold_98:260133-260370:260133-260394:+	PB.6615.10,PB.6615.3,PB.6615.6,PB.6615.9	PB.6615.6,PB.6615.7,PB.6615.2,PB.6615.9,PB.6615.10,PB.6615.4,PB.6615.3
Scaffold_98	Ppup079870	Ppup079870;A3:Scaffold_98:261172-262364:261172-262455:+	PB.6615.10,PB.6615.11,PB.6615.4,PB.6615.2	PB.6615.1,PB.6615.2,PB.6615.10,PB.6615.11,PB.6615.4,PB.6615.3
Scaffold_98	Ppup079870	Ppup079870;A3:Scaffold_98:260133-260389:260133-260394:+	PB.6615.1,PB.6615.5	PB.6615.1,PB.6615.7,PB.6615.2,PB.6615.5,PB.6615.4
Scaffold_98	Ppup080190	Ppup080190;A3:Scaffold_98:722784-723752:722784-723836:+	PB.6634.4,PB.6634.9,PB.6634.10	PB.6634.6,PB.6634.1,PB.6634.10,PB.6634.9,PB.6634.8,PB.6634.4
Scaffold_98	Ppup080230	Ppup080230;A3:Scaffold_98:814594-814697:814594-814711:+	PB.6639.4	PB.6639.5,PB.6639.4
Scaffold_98	Ppup080230	Ppup080230;A3:Scaffold_98:814594-814691:814594-814697:+	PB.6639.3	PB.6639.4,PB.6639.3
Scaffold_98	Ppup080230	Ppup080230;A3:Scaffold_98:814594-814691:814594-814711:+	PB.6639.3	PB.6639.5,PB.6639.3
Scaffold_98	Ppup080310_Ppup080300	Ppup080310_Ppup080300;A3:Scaffold_98:969196-969633:969196-969645:+	MSTRG.11922.2	MSTRG.11922.1,MSTRG.11922.2
Scaffold_993	Ppup155290	Ppup155290;A3:Scaffold_993:121384-121552:121294-121552:-	PB.8580.1	PB.8580.1,PB.8580.2
Scaffold_993	Ppup155290	Ppup155290;A3:Scaffold_993:121384-121552:121305-121552:-	PB.8580.1	PB.8580.1,PB.8580.3
Scaffold_993	Ppup155290	Ppup155290;A3:Scaffold_993:121305-121552:121294-121552:-	PB.8580.3	PB.8580.3,PB.8580.2
seqname	gene_id	event_id	alternative_transcripts	total_transcripts
Scaffold_0	Ppup138780	Ppup138780;A5:Scaffold_0:396627-396709:396627-396724:-	PB.8.7,PB.8.9,PB.8.10,PB.8.14	PB.8.10,PB.8.15,PB.8.5,PB.8.13,PB.8.14,PB.8.2,PB.8.9,PB.8.1,PB.8.7,PB.8.6,PB.8.12
Scaffold_0	Ppup138880	Ppup138880;A5:Scaffold_0:688375-688990:688375-689228:-	PB.16.3,PB.16.4	PB.16.2,PB.16.4,PB.16.1,PB.16.5,PB.16.3
Scaffold_0	Ppup138970	Ppup138970;A5:Scaffold_0:724520-726774:724520-727189:-	MSTRG.23.3	MSTRG.23.3,MSTRG.23.1
Scaffold_0	Ppup138970	Ppup138970;A5:Scaffold_0:724520-726774:724520-726861:-	MSTRG.23.3	MSTRG.23.3,MSTRG.23.2
Scaffold_0	Ppup138970	Ppup138970;A5:Scaffold_0:724520-726861:724520-727189:-	MSTRG.23.2	MSTRG.23.2,MSTRG.23.1
Scaffold_0	Ppup138980	Ppup138980;A5:Scaffold_0:737148-737244:737148-737246:-	PB.21.2,PB.21.1,PB.21.22,PB.21.5,PB.21.14,PB.21.19,PB.21.3,PB.21.15,PB.21.20,PB.21.21,PB.21.4,PB.21.7,PB.21.8,PB.21.10,PB.21.16,PB.21.18,PB.21.9,PB.21.24,PB.21.23,PB.21.25,PB.21.26,PB.21.27	PB.21.4,PB.21.24,PB.21.5,PB.21.20,PB.21.21,PB.21.2,PB.21.7,PB.21.3,PB.21.18,PB.21.9,PB.21.23,PB.21.10,PB.21.28,PB.21.15,PB.21.26,PB.21.1,PB.21.14,PB.21.8,PB.21.16,PB.21.25,PB.21.27,PB.21.22,PB.21.19
Scaffold_0	Ppup138980	Ppup138980;A5:Scaffold_0:737148-737243:737148-737244:-	PB.21.6	PB.21.4,PB.21.24,PB.21.5,PB.21.20,PB.21.21,PB.21.2,PB.21.7,PB.21.3,PB.21.27,PB.21.18,PB.21.9,PB.21.23,PB.21.10,PB.21.15,PB.21.26,PB.21.1,PB.21.14,PB.21.8,PB.21.16,PB.21.25,PB.21.6,PB.21.22,PB.21.19
Scaffold_0	Ppup138980	Ppup138980;A5:Scaffold_0:737148-737243:737148-737246:-	PB.21.6	PB.21.6,PB.21.28
Scaffold_0	Ppup138980	Ppup138980;A5:Scaffold_0:737803-740186:737803-740240:-	PB.21.19,PB.21.23	PB.21.4,PB.21.19,PB.21.23
Scaffold_0	Ppup138980	Ppup138980;A5:Scaffold_0:737803-739679:737803-740186:-	PB.21.3,PB.21.25	PB.21.25,PB.21.23,PB.21.3,PB.21.19
Scaffold_0	Ppup138980	Ppup138980;A5:Scaffold_0:737803-739679:737803-740240:-	PB.21.3,PB.21.25	PB.21.4,PB.21.25,PB.21.3
Scaffold_0	Ppup138980	Ppup138980;A5:Scaffold_0:737803-740405:737803-740534:-	PB.21.15,PB.21.20,PB.21.7,PB.21.26	PB.21.20,PB.21.21,PB.21.2,PB.21.7,PB.21.8,PB.21.15,PB.21.26,PB.21.27
Scaffold_0	Ppup138980	Ppup138980;A5:Scaffold_0:737803-740240:737803-740534:-	PB.21.4	PB.21.21,PB.21.4,PB.21.2,PB.21.8,PB.21.27
Scaffold_0	Ppup138980	Ppup138980;A5:Scaffold_0:737803-740240:737803-740405:-	PB.21.4	PB.21.20,PB.21.4,PB.21.7,PB.21.15,PB.21.26
Scaffold_0	Ppup138980	Ppup138980;A5:Scaffold_0:737803-738835:737803-739110:-	PB.21.28	PB.21.14,PB.21.28
Scaffold_0	Ppup139160	Ppup139160;A5:Scaffold_0:837743-840021:837743-840180:-	PB.39.3	PB.39.1,PB.39.2,PB.39.3
Scaffold_0	Ppup139660_Ppup139650	Ppup139660_Ppup139650;A5:Scaffold_0:1720264-1722446:1720264-1723157:-	PB.70.4	PB.70.4,PB.70.1,PB.70.2
Scaffold_0	Ppup139870	Ppup139870;A5:Scaffold_0:1993607-1993976:1993607-1994156:-	PB.89.11	PB.89.10,PB.89.11
Scaffold_0	Ppup139870	Ppup139870;A5:Scaffold_0:1993607-1993976:1993607-1994076:-	PB.89.11	PB.89.6,PB.89.11
Scaffold_0	Ppup139870	Ppup139870;A5:Scaffold_0:1993607-1993886:1993607-1994156:-	PB.89.2	PB.89.10,PB.89.2
Scaffold_0	Ppup139870	Ppup139870;A5:Scaffold_0:1993607-1993886:1993607-1993976:-	PB.89.2	PB.89.11,PB.89.2
Scaffold_0	Ppup139870	Ppup139870;A5:Scaffold_0:1993607-1993886:1993607-1994076:-	PB.89.2	PB.89.6,PB.89.2
Scaffold_0	Ppup139870	Ppup139870;A5:Scaffold_0:1993607-1994076:1993607-1994156:-	PB.89.6	PB.89.6,PB.89.10
Scaffold_0	Ppup139870	Ppup139870;A5:Scaffold_0:1993607-1994306:1993607-1994640:-	PB.89.1,PB.89.19	PB.89.19,PB.89.20,PB.89.7,PB.89.1
Scaffold_0	Ppup140010	Ppup140010;A5:Scaffold_0:2234452-2235007:2234452-2235442:-	PB.98.1,PB.98.13	PB.98.12,PB.98.1,PB.98.11,PB.98.3,PB.98.13
Scaffold_0	Ppup140010	Ppup140010;A5:Scaffold_0:2234452-2235007:2234452-2236031:-	PB.98.1,PB.98.13	PB.98.13,PB.98.1,PB.98.17,PB.98.4
Scaffold_0	Ppup140010	Ppup140010;A5:Scaffold_0:2234452-2235007:2234452-2235976:-	PB.98.1,PB.98.13	PB.98.13,PB.98.1,PB.98.14
Scaffold_0	Ppup140010	Ppup140010;A5:Scaffold_0:2234452-2235442:2234452-2236031:-	PB.98.3,PB.98.12	PB.98.17,PB.98.12,PB.98.3,PB.98.4
Scaffold_0	Ppup140010	Ppup140010;A5:Scaffold_0:2234452-2235442:2234452-2235976:-	PB.98.3,PB.98.12	PB.98.12,PB.98.14,PB.98.3
Scaffold_0	Ppup140010	Ppup140010;A5:Scaffold_0:2234452-2235976:2234452-2236031:-	PB.98.14	PB.98.17,PB.98.14,PB.98.4
Scaffold_0	Ppup140140	Ppup140140;A5:Scaffold_0:2313005-2313083:2313005-2313084:-	PB.110.7	PB.110.2,PB.110.11,PB.110.1,PB.110.7,PB.110.12,PB.110.10
Scaffold_0	novelGeneAS003	novelGeneAS003;A5:Scaffold_0:3381335-3382769:3381335-3382871:-	PB.146.21	PB.146.5,PB.146.20,PB.146.21,PB.146.2
Scaffold_0	novelGeneAS003	novelGeneAS003;A5:Scaffold_0:3381335-3385082:3381335-3385134:-	PB.146.18	PB.146.4,PB.146.3,PB.146.19,PB.146.13,PB.146.18
Scaffold_0	Ppup140870	Ppup140870;A5:Scaffold_0:3476000-3476177:3476000-3476230:-	PB.158.3,PB.158.8	PB.158.8,PB.158.3,PB.158.4
Scaffold_0	Ppup140870	Ppup140870;A5:Scaffold_0:3476000-3476580:3476000-3476709:-	PB.158.10,PB.158.9	PB.158.12,PB.158.10,PB.158.9
Scaffold_0	Ppup140870	Ppup140870;A5:Scaffold_0:3476000-3476709:3476000-3477079:-	PB.158.12	PB.158.7,PB.158.12,PB.158.2,PB.158.6,PB.158.1
Scaffold_0	Ppup140970	Ppup140970;A5:Scaffold_0:3704396-3704468:3704396-3705393:-	PB.166.1	PB.166.3,PB.166.1
Scaffold_0	Ppup140970	Ppup140970;A5:Scaffold_0:3704396-3705393:3704396-3705431:-	PB.166.3	PB.166.3,PB.166.2
Scaffold_0	Ppup140980	Ppup140980;A5:Scaffold_0:3707829-3708516:3707829-3708874:-	PB.167.2,PB.167.6	PB.167.6,PB.167.2,PB.167.4,PB.167.5,PB.167.8
Scaffold_0	Ppup141140	Ppup141140;A5:Scaffold_0:4451427-4452960:4451427-4453281:-	PB.179.1,PB.179.2	PB.179.2,PB.179.3,PB.179.1,PB.179.8
Scaffold_0	Ppup141160	Ppup141160;A5:Scaffold_0:4461335-4462140:4461335-4462172:-	PB.181.4	PB.181.2,PB.181.4
Scaffold_0	Ppup141160	Ppup141160;A5:Scaffold_0:4461335-4462140:4461335-4462624:-	PB.181.4	PB.181.6,PB.181.8,PB.181.12,PB.181.4
Scaffold_0	Ppup141160	Ppup141160;A5:Scaffold_0:4461335-4462624:4461335-4462781:-	PB.181.6,PB.181.8,PB.181.12	PB.181.6,PB.181.9,PB.181.12,PB.181.11,PB.181.13,PB.181.1,PB.181.8
Scaffold_0	Ppup141230	Ppup141230;A5:Scaffold_0:4518107-4518430:4518107-4518436:-	PB.186.3	PB.186.3,PB.186.7
Scaffold_0	Ppup141230	Ppup141230;A5:Scaffold_0:4518107-4518430:4518107-4518968:-	PB.186.3	PB.186.2,PB.186.3
Scaffold_0	Ppup141230	Ppup141230;A5:Scaffold_0:4518107-4518430:4518107-4518960:-	PB.186.3	PB.186.4,PB.186.3,PB.186.6
Scaffold_0	Ppup141230	Ppup141230;A5:Scaffold_0:4518107-4518960:4518107-4518968:-	PB.186.4,PB.186.6	PB.186.2,PB.186.4,PB.186.6
Scaffold_0	Ppup141330	Ppup141330;A5:Scaffold_0:4567208-4567464:4567208-4567619:-	PB.195.5	PB.195.6,PB.195.4,PB.195.3,PB.195.5,PB.195.9
Scaffold_0	Ppup141530	Ppup141530;A5:Scaffold_0:4664187-4666384:4664187-4666483:-	PB.209.11,PB.209.15	PB.209.8,PB.209.19,PB.209.11,PB.209.20,PB.209.17,PB.209.5,PB.209.1,PB.209.15
Scaffold_0	Ppup141670	Ppup141670;A5:Scaffold_0:4720764-4721013:4720764-4721034:-	PB.217.2,PB.217.7,PB.217.9,PB.217.11,PB.217.13,PB.217.15	PB.217.1,PB.217.12,PB.217.14,PB.217.4,PB.217.9,PB.217.11,PB.217.15,PB.217.13,PB.217.2,PB.217.3,PB.217.8,PB.217.16,PB.217.7,PB.217.10
Scaffold_0	Ppup141700	Ppup141700;A5:Scaffold_0:4736157-4736801:4736157-4737209:-	PB.218.3	PB.218.10,PB.218.3,PB.218.4,PB.218.15
Scaffold_0	Ppup141700	Ppup141700;A5:Scaffold_0:4736157-4736498:4736157-4736801:-	PB.218.5,PB.218.2,PB.218.11,PB.218.9,PB.218.12,PB.218.14	PB.218.3,PB.218.11,PB.218.12,PB.218.9,PB.218.5,PB.218.2,PB.218.14
Scaffold_0	Ppup141700	Ppup141700;A5:Scaffold_0:4736157-4736498:4736157-4737209:-	PB.218.5,PB.218.2,PB.218.11,PB.218.9,PB.218.12,PB.218.14	PB.218.11,PB.218.4,PB.218.12,PB.218.9,PB.218.10,PB.218.5,PB.218.15,PB.218.2,PB.218.14
Scaffold_0	Ppup141730	Ppup141730;A5:Scaffold_0:4753058-4753129:4753058-4753155:-	PB.221.2	PB.221.1,PB.221.2
Scaffold_0	Ppup141850	Ppup141850;A5:Scaffold_0:4875592-4875824:4875592-4876037:-	PB.230.3	PB.230.3,PB.230.5
Scaffold_0	Ppup142590	Ppup142590;A5:Scaffold_0:6069858-6070568:6069858-6070581:-	PB.286.4	PB.286.4,PB.286.2
Scaffold_0	Ppup142720	Ppup142720;A5:Scaffold_0:6243318-6243412:6243318-6243801:-	MSTRG.344.9	MSTRG.344.9,MSTRG.344.8
Scaffold_0	Ppup143040_Ppup143030	Ppup143040_Ppup143030;A5:Scaffold_0:6855012-6884276:6855012-6884278:-	PB.329.3	PB.329.2,PB.329.3
Scaffold_0	Ppup143230	Ppup143230;A5:Scaffold_0:7391258-7391971:7391258-7392658:-	PB.344.18	PB.344.22,PB.344.1,PB.344.16,PB.344.4,PB.344.19,PB.344.8,PB.344.7,PB.344.20,PB.344.18,PB.344.21
Scaffold_0	Ppup143700	Ppup143700;A5:Scaffold_0:8629304-8630300:8629304-8630383:-	PB.373.3	PB.373.3,PB.373.1
Scaffold_0	Ppup143910	Ppup143910;A5:Scaffold_0:9284571-9286214:9284571-9286539:-	PB.386.3	PB.386.1,PB.386.4,PB.386.3,PB.386.5
Scaffold_0	Ppup143920	Ppup143920;A5:Scaffold_0:9294161-9294579:9294161-9294704:-	PB.388.13	PB.388.13,PB.388.1,PB.388.11,PB.388.6,PB.388.10
Scaffold_0	Ppup143920	Ppup143920;A5:Scaffold_0:9294161-9294704:9294161-9295378:-	PB.388.10,PB.388.11	PB.388.12,PB.388.10,PB.388.11
Scaffold_0	Ppup144230	Ppup144230;A5:Scaffold_0:9677405-9698663:9677405-9698790:-	MSTRG.465.1	MSTRG.465.2,MSTRG.465.1
Scaffold_0	Ppup144280	Ppup144280;A5:Scaffold_0:9935954-9938169:9935954-9938313:-	PB.406.3,PB.406.5,PB.406.8	PB.406.1,PB.406.8,PB.406.7,PB.406.3,PB.406.5
Scaffold_0	Ppup144320_Ppup144300	Ppup144320_Ppup144300;A5:Scaffold_0:9944682-9945387:9944682-9945440:-	PB.407.2	PB.407.3,PB.407.2
Scaffold_0	Ppup144560	Ppup144560;A5:Scaffold_0:10346160-10347902:10346160-10348475:-	PB.427.1	PB.427.1,PB.427.2,PB.427.3
Scaffold_0	Ppup144820	Ppup144820;A5:Scaffold_0:10620917-10625472:10620917-10626014:-	PB.450.1	PB.450.3,PB.450.1
Scaffold_0	novelGenePB.451	novelGenePB.451;A5:Scaffold_0:10631062-10631660:10631062-10631690:-	PB.451.3	PB.451.2,PB.451.3
Scaffold_0	Ppup144960	Ppup144960;A5:Scaffold_0:10697294-10697433:10697294-10697444:-	PB.461.1	PB.461.1,PB.461.6,PB.461.3
Scaffold_0	Ppup145290	Ppup145290;A5:Scaffold_0:11121623-11127871:11121623-11127927:-	PB.486.3	PB.486.2,PB.486.3,PB.486.1
Scaffold_0	Ppup145510	Ppup145510;A5:Scaffold_0:11450747-11451279:11450747-11451428:-	PB.499.6	PB.499.5,PB.499.16,PB.499.17,PB.499.6
Scaffold_0	Ppup146120	Ppup146120;A5:Scaffold_0:12024211-12024488:12024211-12024489:-	PB.553.1	PB.553.1,PB.553.2
Scaffold_0	Ppup146280	Ppup146280;A5:Scaffold_0:12235465-12237132:12235465-12237210:-	PB.562.5,PB.562.10,PB.562.21,PB.562.27,PB.562.29,PB.562.30,PB.562.37,PB.562.45,PB.562.49,PB.562.47	PB.562.37,PB.562.47,PB.562.5,PB.562.10,PB.562.53,PB.562.49,PB.562.45,PB.562.27,PB.562.38,PB.562.29,PB.562.30,PB.562.21,PB.562.24
Scaffold_0	Ppup146280	Ppup146280;A5:Scaffold_0:12235465-12237027:12235465-12237132:-	PB.562.17,PB.562.26,PB.562.31,PB.562.36,PB.562.46	PB.562.37,PB.562.47,PB.562.5,PB.562.10,PB.562.31,PB.562.26,PB.562.49,PB.562.45,PB.562.27,PB.562.29,PB.562.36,PB.562.30,PB.562.21,PB.562.32,PB.562.46,PB.562.17
Scaffold_0	Ppup146280	Ppup146280;A5:Scaffold_0:12235465-12237027:12235465-12237210:-	PB.562.17,PB.562.26,PB.562.31,PB.562.36,PB.562.46	PB.562.53,PB.562.31,PB.562.26,PB.562.38,PB.562.36,PB.562.24,PB.562.46,PB.562.17
Scaffold_0	Ppup146370	Ppup146370;A5:Scaffold_0:12275585-12276688:12275585-12278627:-	PB.572.4	PB.572.4,PB.572.2
Scaffold_0	novelGeneMSTRG.668	novelGeneMSTRG.668;A5:Scaffold_0:12580350-12580521:12580350-12580526:-	MSTRG.668.2	MSTRG.668.1,MSTRG.668.2
Scaffold_0	Ppup146570	Ppup146570;A5:Scaffold_0:12774085-12774770:12774085-12775004:-	PB.587.8	PB.587.8,PB.587.7,PB.587.21
Scaffold_0	Ppup146570	Ppup146570;A5:Scaffold_0:12774085-12775004:12774085-12775229:-	PB.587.7,PB.587.21	PB.587.7,PB.587.1,PB.587.23,PB.587.21
Scaffold_0	Ppup146570	Ppup146570;A5:Scaffold_0:12774085-12775496:12774085-12775569:-	PB.587.10,PB.587.5,PB.587.22	PB.587.20,PB.587.22,PB.587.24,PB.587.28,PB.587.25,PB.587.5,PB.587.6,PB.587.2,PB.587.10
Scaffold_0	Ppup146570	Ppup146570;A5:Scaffold_0:12774085-12775496:12774085-12775520:-	PB.587.10,PB.587.5,PB.587.22	PB.587.19,PB.587.4,PB.587.22,PB.587.5,PB.587.10
Scaffold_0	Ppup146570	Ppup146570;A5:Scaffold_0:12774085-12775332:12774085-12775496:-	PB.587.3	PB.587.3,PB.587.22,PB.587.5,PB.587.10
Scaffold_0	Ppup146570	Ppup146570;A5:Scaffold_0:12774085-12775332:12774085-12775569:-	PB.587.3	PB.587.20,PB.587.3,PB.587.24,PB.587.28,PB.587.25,PB.587.6,PB.587.2
Scaffold_0	Ppup146570	Ppup146570;A5:Scaffold_0:12774085-12775332:12774085-12775520:-	PB.587.3	PB.587.4,PB.587.19,PB.587.3
Scaffold_0	Ppup146570	Ppup146570;A5:Scaffold_0:12774085-12775229:12774085-12775496:-	PB.587.1	PB.587.22,PB.587.5,PB.587.1,PB.587.10
Scaffold_0	Ppup146570	Ppup146570;A5:Scaffold_0:12774085-12775229:12774085-12775332:-	PB.587.1	PB.587.3,PB.587.1
Scaffold_0	Ppup146570	Ppup146570;A5:Scaffold_0:12774085-12775229:12774085-12775569:-	PB.587.1	PB.587.1,PB.587.20,PB.587.24,PB.587.28,PB.587.25,PB.587.6,PB.587.2
Scaffold_0	Ppup146570	Ppup146570;A5:Scaffold_0:12774085-12775229:12774085-12775520:-	PB.587.1	PB.587.4,PB.587.19,PB.587.1
Scaffold_0	Ppup146570	Ppup146570;A5:Scaffold_0:12774085-12775520:12774085-12775569:-	PB.587.4,PB.587.19	PB.587.19,PB.587.4,PB.587.20,PB.587.24,PB.587.28,PB.587.25,PB.587.6,PB.587.2
Scaffold_0	Ppup147170	Ppup147170;A5:Scaffold_0:13528568-13528660:13528568-13528707:-	PB.630.2	PB.630.2,PB.630.1
Scaffold_0	Ppup138770	Ppup138770;A5:Scaffold_0:391453-391543:391435-391543:+	PB.7.2	PB.7.2,MSTRG.7.2,PB.7.1
Scaffold_0	Ppup139070	Ppup139070;A5:Scaffold_0:776599-776683:776590-776683:+	PB.29.4,PB.29.1,PB.29.10,PB.29.11,PB.29.5,PB.29.9,PB.29.8	PB.29.11,PB.29.2,PB.29.7,PB.29.6,PB.29.10,PB.29.8,PB.29.5,PB.29.1,PB.29.9,PB.29.3,PB.29.4
Scaffold_0	Ppup139070	Ppup139070;A5:Scaffold_0:778577-779446:778549-779446:+	PB.30.2	PB.30.4,PB.30.5,PB.30.2
Scaffold_0	Ppup139070	Ppup139070;A5:Scaffold_0:778577-779440:778549-779440:+	PB.30.6	PB.30.6,PB.30.3
Scaffold_0	Ppup139130	Ppup139130;A5:Scaffold_0:821186-821331:821085-821331:+	PB.36.12	PB.36.12,PB.36.9
Scaffold_0	Ppup139510	Ppup139510;A5:Scaffold_0:1492433-1494160:1492295-1494160:+	PB.58.2	PB.58.2,PB.58.3
Scaffold_0	Ppup139800	Ppup139800;A5:Scaffold_0:1899234-1899339:1899210-1899339:+	PB.83.19,PB.83.16,PB.83.15,PB.83.2,PB.83.3	PB.83.15,PB.83.2,PB.83.14,PB.83.6,PB.83.11,PB.83.19,PB.83.18,PB.83.3,PB.83.16
Scaffold_0	Ppup140070	Ppup140070;A5:Scaffold_0:2286355-2286430:2286328-2286430:+	PB.104.2	PB.104.2,PB.104.3
Scaffold_0	Ppup140190	Ppup140190;A5:Scaffold_0:2334659-2334974:2334647-2334974:+	PB.113.3,PB.113.4	PB.113.2,PB.113.5,PB.113.4,PB.113.1,PB.113.3
Scaffold_0	Ppup140390	Ppup140390;A5:Scaffold_0:2812239-2812325:2812183-2812325:+	PB.129.5	PB.129.5,PB.129.6
Scaffold_0	Ppup140440	Ppup140440;A5:Scaffold_0:3009676-3010387:3008906-3010387:+	PB.134.4	PB.134.2,PB.134.4
Scaffold_0	Ppup140440	Ppup140440;A5:Scaffold_0:3005132-3008112:3004927-3008112:+	PB.134.7,PB.134.9	PB.134.2,PB.134.5,PB.134.8,PB.134.9,PB.134.7,PB.134.3,PB.134.4
Scaffold_0	Ppup140440	Ppup140440;A5:Scaffold_0:3007325-3008112:3007184-3008112:+	PB.134.10	PB.134.10,PB.134.11
Scaffold_0	Ppup140720	Ppup140720;A5:Scaffold_0:3368363-3369133:3368342-3369133:+	PB.143.8,PB.143.5	PB.143.6,PB.143.8,PB.143.5
Scaffold_0	Ppup140720	Ppup140720;A5:Scaffold_0:3369672-3369853:3369393-3369853:+	PB.143.14	PB.143.14,PB.143.5,PB.143.2,PB.143.4,PB.143.1,PB.143.3,PB.143.6,PB.143.8
Scaffold_0	Ppup140860	Ppup140860;A5:Scaffold_0:3465718-3465867:3465429-3465867:+	PB.157.3	PB.157.2,PB.157.3,PB.157.1
Scaffold_0	Ppup141460	Ppup141460;A5:Scaffold_0:4619075-4619195:4619063-4619195:+	PB.201.9,PB.201.10,PB.201.3,PB.201.5	PB.201.9,PB.201.6,PB.201.5,PB.201.3,PB.201.8,PB.201.4,PB.201.7,PB.201.10
Scaffold_0	Ppup141800	Ppup141800;A5:Scaffold_0:4794378-4799479:4794303-4799479:+	PB.225.27,PB.225.19,PB.225.28,PB.225.29,PB.225.23,PB.225.22	PB.225.19,PB.225.23,PB.225.18,PB.225.29,PB.225.28,PB.225.22,PB.225.27
Scaffold_0	Ppup141800	Ppup141800;A5:Scaffold_0:4794442-4799479:4794378-4799479:+	PB.225.21,PB.225.20	PB.225.19,PB.225.21,PB.225.20,PB.225.23,PB.225.29,PB.225.28,PB.225.22,PB.225.27
Scaffold_0	Ppup141800	Ppup141800;A5:Scaffold_0:4794442-4799479:4794303-4799479:+	PB.225.21,PB.225.20	PB.225.20,PB.225.21,PB.225.18
Scaffold_0	Ppup141800	Ppup141800;A5:Scaffold_0:4796562-4799479:4796465-4799479:+	PB.225.34,PB.225.33,PB.225.37,PB.225.32,PB.225.35,PB.225.38	PB.225.35,PB.225.33,PB.225.32,PB.225.34,PB.225.37,PB.225.36,PB.225.38
Scaffold_0	Ppup141800	Ppup141800;A5:Scaffold_0:4799164-4799479:4799024-4799479:+	PB.225.63,PB.225.64	PB.225.62,PB.225.59,PB.225.61,PB.225.63,PB.225.64
Scaffold_0	Ppup141800	Ppup141800;A5:Scaffold_0:4799313-4799479:4799024-4799479:+	PB.225.69,PB.225.68,PB.225.66,PB.225.70	PB.225.69,PB.225.68,PB.225.62,PB.225.59,PB.225.61,PB.225.66,PB.225.70
Scaffold_0	Ppup141800	Ppup141800;A5:Scaffold_0:4799313-4799479:4799164-4799479:+	PB.225.69,PB.225.68,PB.225.66,PB.225.70	PB.225.69,PB.225.68,PB.225.63,PB.225.66,PB.225.70,PB.225.64
Scaffold_0	Ppup141800	Ppup141800;A5:Scaffold_0:4799313-4799479:4799230-4799479:+	PB.225.69,PB.225.68,PB.225.66,PB.225.70	PB.225.69,PB.225.68,PB.225.67,PB.225.65,PB.225.66,PB.225.70
Scaffold_0	Ppup141800	Ppup141800;A5:Scaffold_0:4799230-4799479:4799024-4799479:+	PB.225.65,PB.225.67	PB.225.67,PB.225.65,PB.225.62,PB.225.59,PB.225.61
Scaffold_0	Ppup141800	Ppup141800;A5:Scaffold_0:4799230-4799479:4799164-4799479:+	PB.225.65,PB.225.67	PB.225.65,PB.225.63,PB.225.67,PB.225.64
Scaffold_0	Ppup142050_Ppup142060	Ppup142050_Ppup142060;A5:Scaffold_0:5173788-5175568:5173773-5175568:+	PB.244.34	PB.244.27,PB.244.34
Scaffold_0	Ppup142050_Ppup142060	Ppup142050_Ppup142060;A5:Scaffold_0:5173788-5175532:5173773-5175532:+	PB.244.49	PB.244.52,PB.244.49,PB.244.24
Scaffold_0	Ppup142050_Ppup142060_Ppup142070	Ppup142050_Ppup142060_Ppup142070;A5:Scaffold_0:5173773-5175471:5173769-5175471:+	PB.244.43	PB.244.42,PB.244.43
Scaffold_0	Ppup142520	Ppup142520;A5:Scaffold_0:5896413-5896844:5896411-5896844:+	PB.279.7	PB.279.2,PB.279.3,PB.279.9,PB.279.7,PB.279.10,PB.279.11,PB.279.1
Scaffold_0	novelGeneAS012	novelGeneAS012;A5:Scaffold_0:7595530-7602556:7595521-7602556:+	PB.345.2	PB.345.1,PB.345.2
Scaffold_0	novelGeneAS013	novelGeneAS013;A5:Scaffold_0:8031741-8031815:8031736-8031815:+	PB.357.2,PB.357.4,PB.357.5,PB.357.1	PB.357.5,PB.357.1,PB.357.4,PB.357.3,PB.357.2
Scaffold_0	Ppup143660	Ppup143660;A5:Scaffold_0:8561322-8561956:8561259-8561956:+	PB.370.9,PB.370.2,PB.370.1,PB.370.15,PB.370.16	PB.370.13,PB.370.25,PB.370.7,PB.370.9,PB.370.18,PB.370.15,PB.370.12,PB.370.19,PB.370.1,PB.370.16,PB.370.2
Scaffold_0	Ppup143660	Ppup143660;A5:Scaffold_0:8463582-8466998:8463293-8466998:+	PB.370.7,PB.370.1	PB.370.13,PB.370.7,PB.370.9,PB.370.12,PB.370.1,PB.370.2
Scaffold_0	Ppup143690	Ppup143690;A5:Scaffold_0:8614948-8615946:8614822-8615946:+	PB.372.13	PB.372.1,PB.372.11,PB.372.10,PB.372.13
Scaffold_0	Ppup143690	Ppup143690;A5:Scaffold_0:8619243-8621656:8618710-8621656:+	PB.372.16	PB.372.17,PB.372.16
Scaffold_0	Ppup143690	Ppup143690;A5:Scaffold_0:8620180-8621656:8620173-8621656:+	PB.372.20,PB.372.21	PB.372.21,PB.372.20,PB.372.24
Scaffold_0	Ppup144260	Ppup144260;A5:Scaffold_0:9834010-9834092:9834009-9834092:+	PB.404.7	PB.404.5,PB.404.7,PB.404.1
Scaffold_0	Ppup144380_Ppup144390	Ppup144380_Ppup144390;A5:Scaffold_0:10004643-10004980:10004454-10004980:+	PB.412.7	PB.412.6,PB.412.7,PB.412.5,PB.412.3,PB.412.2
Scaffold_0	Ppup144460	Ppup144460;A5:Scaffold_0:10065846-10065915:10065702-10065915:+	PB.418.2,PB.418.16,PB.418.14,PB.418.3,PB.418.5	PB.418.12,PB.418.16,PB.418.5,PB.418.3,PB.418.14,PB.418.2,PB.418.8
Scaffold_0	Ppup144460	Ppup144460;A5:Scaffold_0:10065846-10065915:10065842-10065915:+	PB.418.2,PB.418.16,PB.418.14,PB.418.3,PB.418.5	PB.418.16,PB.418.5,PB.418.7,PB.418.3,PB.418.14,PB.418.2
Scaffold_0	Ppup144460	Ppup144460;A5:Scaffold_0:10065842-10065915:10065702-10065915:+	PB.418.7	PB.418.12,PB.418.7,PB.418.8
Scaffold_0	Ppup144570	Ppup144570;A5:Scaffold_0:10352111-10352406:10351119-10352406:+	PB.428.7	PB.428.4,PB.428.7
Scaffold_0	Ppup144610	Ppup144610;A5:Scaffold_0:10383234-10384104:10383180-10384104:+	PB.432.5	PB.432.5,PB.432.3
Scaffold_0	Ppup144760	Ppup144760;A5:Scaffold_0:10595635-10596272:10595444-10596272:+	PB.445.1,PB.445.11,PB.445.4,PB.445.10	PB.445.4,PB.445.14,PB.445.1,PB.445.10,PB.445.11
Scaffold_0	Ppup144760	Ppup144760;A5:Scaffold_0:10595635-10596272:10595230-10596272:+	PB.445.11,PB.445.10	PB.445.3,PB.445.10,PB.445.11
Scaffold_0	Ppup144760	Ppup144760;A5:Scaffold_0:10595444-10596272:10595230-10596272:+	PB.445.14	PB.445.3,PB.445.14
Scaffold_0	Ppup144760	Ppup144760;A5:Scaffold_0:10595244-10595330:10595222-10595330:+	PB.445.4,PB.445.7	PB.445.4,PB.445.7,PB.445.1
Scaffold_0	Ppup144880	Ppup144880;A5:Scaffold_0:10660668-10660824:10660662-10660824:+	PB.455.19,PB.455.20,PB.455.21	PB.455.20,PB.455.21,PB.455.17,PB.455.19
Scaffold_0	Ppup144950	Ppup144950;A5:Scaffold_0:10686616-10686685:10686612-10686685:+	PB.460.5	PB.460.5,PB.460.4
Scaffold_0	Ppup145020	Ppup145020;A5:Scaffold_0:10720027-10720151:10719886-10720151:+	PB.466.2	PB.466.3,PB.466.2
Scaffold_0	Ppup145250	Ppup145250;A5:Scaffold_0:10975239-10975621:10974885-10975621:+	PB.485.2	PB.485.1,PB.485.2
Scaffold_0	Ppup145760	Ppup145760;A5:Scaffold_0:11616055-11616131:11615641-11616131:+	PB.521.9	PB.521.8,PB.521.9,PB.521.6
Scaffold_0	Ppup145760	Ppup145760;A5:Scaffold_0:11616061-11616131:11616055-11616131:+	PB.521.10	PB.521.10,PB.521.9
Scaffold_0	Ppup145930	Ppup145930;A5:Scaffold_0:11856021-11856148:11855894-11856148:+	PB.535.2	PB.535.2,PB.535.3
Scaffold_0	Ppup146010	Ppup146010;A5:Scaffold_0:11953905-11954070:11953852-11954070:+	PB.543.3	PB.543.3,PB.543.2
Scaffold_0	Ppup146230	Ppup146230;A5:Scaffold_0:12130071-12139777:12130070-12139777:+	PB.557.6,PB.557.1,PB.557.2,PB.557.3	PB.557.3,PB.557.12,PB.557.6,PB.557.2,PB.557.1
Scaffold_0	Ppup146230	Ppup146230;A5:Scaffold_0:12173657-12174111:12173624-12174111:+	PB.557.6,PB.557.1,PB.557.3,PB.557.4,PB.557.12,PB.557.13	PB.557.3,PB.557.12,PB.557.4,PB.557.14,PB.557.13,PB.557.6,PB.557.2,PB.557.1
Scaffold_0	Ppup146310	Ppup146310;A5:Scaffold_0:12251751-12251882:12251740-12251882:+	PB.566.1	PB.566.1,PB.566.2
Scaffold_0	Ppup147090	Ppup147090;A5:Scaffold_0:13422774-13424186:13422657-13424186:+	PB.627.13	PB.627.16,PB.627.13
Scaffold_0	Ppup147090	Ppup147090;A5:Scaffold_0:13422778-13424186:13422774-13424186:+	PB.627.17	PB.627.17,PB.627.13
Scaffold_0	Ppup147090	Ppup147090;A5:Scaffold_0:13422778-13424186:13422657-13424186:+	PB.627.17	PB.627.17,PB.627.16
Scaffold_0	Ppup147120	Ppup147120;A5:Scaffold_0:13492761-13492844:13492757-13492844:+	PB.628.6,PB.628.11,PB.628.13,PB.628.15,PB.628.16,PB.628.3,PB.628.4,PB.628.5,PB.628.7,PB.628.8,PB.628.9,PB.628.22,PB.628.24	PB.628.11,PB.628.9,PB.628.13,PB.628.6,PB.628.8,PB.628.4,PB.628.7,PB.628.15,PB.628.24,PB.628.5,PB.628.3,PB.628.22,PB.628.12,PB.628.16
Scaffold_1	Ppup042910	Ppup042910;A5:Scaffold_1:15170-15579:15134-15579:+	PB.632.2,PB.632.3	PB.632.4,PB.632.8,PB.632.6,PB.632.2,PB.632.11,PB.632.3,PB.632.1,PB.632.7
Scaffold_1	Ppup042910	Ppup042910;A5:Scaffold_1:18620-20320:17350-20320:+	PB.632.11	PB.632.4,PB.632.7,PB.632.8,PB.632.6,PB.632.2,PB.632.3,PB.632.1,PB.632.11
Scaffold_1	Ppup043150	Ppup043150;A5:Scaffold_1:189480-189767:188999-189767:+	PB.643.4	PB.643.4,PB.643.3
Scaffold_1	Ppup043480	Ppup043480;A5:Scaffold_1:547002-547638:546544-547638:+	PB.668.1,PB.668.5,PB.668.3,PB.668.4	PB.668.5,PB.668.3,PB.668.4,PB.668.2,PB.668.1
Scaffold_1	Ppup043580	Ppup043580;A5:Scaffold_1:653189-653430:653046-653430:+	PB.676.3	PB.676.1,PB.676.3
Scaffold_1	Ppup043700	Ppup043700;A5:Scaffold_1:872778-876668:872480-876668:+	PB.687.8	PB.687.8,PB.687.10
Scaffold_1	Ppup043720	Ppup043720;A5:Scaffold_1:945500-949419:945353-949419:+	PB.691.2	PB.691.6,PB.691.2
Scaffold_1	Ppup043740	Ppup043740;A5:Scaffold_1:1036840-1037282:1035517-1037282:+	MSTRGCarcass.848.2	MSTRGCarcass.848.2,MSTRGCarcass.848.1
Scaffold_1	Ppup043740	Ppup043740;A5:Scaffold_1:1073481-1073728:1070529-1073728:+	MSTRGCarcass.848.3	MSTRGCarcass.848.2,MSTRGCarcass.848.3
Scaffold_1	Ppup043900	Ppup043900;A5:Scaffold_1:1418868-1420255:1418759-1420255:+	MSTRG.826.3	MSTRG.826.1,MSTRG.826.3
Scaffold_1	Ppup043930	Ppup043930;A5:Scaffold_1:1449610-1450400:1449596-1450400:+	MSTRG.829.1	MSTRG.829.1,MSTRG.829.2
Scaffold_1	Ppup044000	Ppup044000;A5:Scaffold_1:1595537-1596703:1595122-1596703:+	PB.707.5	PB.707.5,PB.707.4
Scaffold_1	Ppup044590_Ppup044600	Ppup044590_Ppup044600;A5:Scaffold_1:2669348-2670393:2669285-2670393:+	PB.731.1,PB.731.2,PB.731.3,PB.731.13,PB.731.19,PB.731.21,PB.731.25	PB.731.2,PB.731.13,PB.731.25,PB.731.3,PB.731.19,PB.731.14,PB.731.21,PB.731.1
Scaffold_1	Ppup044590_Ppup044600	Ppup044590_Ppup044600;A5:Scaffold_1:2669348-2670405:2669285-2670405:+	PB.731.4,PB.731.5,PB.731.9,PB.731.22,PB.731.23	PB.731.9,PB.731.10,PB.731.24,PB.731.4,PB.731.5,PB.731.15,PB.731.23,PB.731.22,PB.731.7
Scaffold_1	Ppup044590_Ppup044600	Ppup044590_Ppup044600;A5:Scaffold_1:2669348-2670390:2669285-2670390:+	PB.731.12	PB.731.20,PB.731.6,PB.731.12
Scaffold_1	Ppup044590_Ppup044600	Ppup044590_Ppup044600;A5:Scaffold_1:2540869-2541756:2540853-2541756:+	PB.731.19,PB.731.22,PB.731.23,PB.731.24	PB.731.21,PB.731.24,PB.731.19,PB.731.23,PB.731.20,PB.731.22
Scaffold_1	Ppup044750	Ppup044750;A5:Scaffold_1:2947815-2948039:2947589-2948039:+	PB.742.35,PB.742.45,PB.742.69,PB.742.73	PB.742.73,PB.742.69,PB.742.35,PB.742.51,PB.742.45
Scaffold_1	Ppup044790	Ppup044790;A5:Scaffold_1:3012236-3014248:3010764-3014248:+	PB.747.6	PB.747.2,PB.747.8,PB.747.6,PB.747.12,PB.747.11,PB.747.14,PB.747.7,PB.747.1,PB.747.9,PB.747.13
Scaffold_1	Ppup044790	Ppup044790;A5:Scaffold_1:3010061-3010126:3010037-3010126:+	PB.747.7	PB.747.14,PB.747.7
Scaffold_1	Ppup044790	Ppup044790;A5:Scaffold_1:3007141-3008779:3007029-3008779:+	PB.747.12	PB.747.11,PB.747.14,PB.747.13,PB.747.12
Scaffold_1	Ppup045470	Ppup045470;A5:Scaffold_1:4472584-4473611:4472536-4473611:+	PB.781.4,PB.781.2	PB.781.4,PB.781.2,PB.781.3,PB.781.1
Scaffold_1	Ppup045470	Ppup045470;A5:Scaffold_1:4479544-4481736:4479518-4481736:+	PB.781.8	PB.781.9,PB.781.8,PB.781.10
Scaffold_1	Ppup045560	Ppup045560;A5:Scaffold_1:4624071-4634523:4624061-4634523:+	PB.787.6,PB.787.5,PB.787.4	PB.787.7,PB.787.3,PB.787.8,PB.787.4,PB.787.6,PB.787.5
Scaffold_1	Ppup045570	Ppup045570;A5:Scaffold_1:4651848-4652647:4651778-4652647:+	PB.788.7	PB.788.9,PB.788.2,PB.788.8,PB.788.7
Scaffold_1	Ppup045720	Ppup045720;A5:Scaffold_1:4907177-4907671:4906880-4907671:+	PB.791.9	PB.791.8,PB.791.9
Scaffold_1	Ppup045770	Ppup045770;A5:Scaffold_1:4927306-4927395:4927301-4927395:+	MSTRG.960.1	MSTRG.960.2,MSTRG.960.1
Scaffold_1	Ppup046170	Ppup046170;A5:Scaffold_1:6084987-6085665:6084942-6085665:+	PB.819.6,PB.819.8,PB.819.9,PB.819.10	PB.819.7,PB.819.8,PB.819.6,PB.819.9,PB.819.10
Scaffold_1	Ppup046280	Ppup046280;A5:Scaffold_1:6156400-6156859:6156363-6156859:+	PB.826.2,PB.826.3,PB.826.4	PB.826.1,PB.826.4,PB.826.3,PB.826.2
Scaffold_1	Ppup046280	Ppup046280;A5:Scaffold_1:6156572-6156859:6156363-6156859:+	PB.826.5	PB.826.5,PB.826.1
Scaffold_1	Ppup046280	Ppup046280;A5:Scaffold_1:6156572-6156859:6156400-6156859:+	PB.826.5	PB.826.5,PB.826.4,PB.826.3,PB.826.2
Scaffold_1	Ppup046790	Ppup046790;A5:Scaffold_1:7138575-7138668:7138431-7138668:+	PB.849.10	PB.849.10,PB.849.7,PB.849.3,PB.849.1
Scaffold_1	Ppup046790	Ppup046790;A5:Scaffold_1:7138575-7138668:7138392-7138668:+	PB.849.10	PB.849.10,PB.849.2
Scaffold_1	Ppup046790	Ppup046790;A5:Scaffold_1:7138575-7138668:7138449-7138668:+	PB.849.10	PB.849.10,PB.849.8,PB.849.9
Scaffold_1	Ppup046790	Ppup046790;A5:Scaffold_1:7138431-7138668:7138392-7138668:+	PB.849.1,PB.849.3,PB.849.7	PB.849.2,PB.849.7,PB.849.3,PB.849.1
Scaffold_1	Ppup046790	Ppup046790;A5:Scaffold_1:7138449-7138668:7138431-7138668:+	PB.849.8,PB.849.9	PB.849.1,PB.849.8,PB.849.7,PB.849.3,PB.849.9
Scaffold_1	Ppup046790	Ppup046790;A5:Scaffold_1:7138449-7138668:7138392-7138668:+	PB.849.8,PB.849.9	PB.849.8,PB.849.2,PB.849.9
Scaffold_1	Ppup046810	Ppup046810;A5:Scaffold_1:7172459-7172537:7172436-7172537:+	PB.850.7	PB.850.4,PB.850.3,PB.850.7,PB.850.10,PB.850.8,PB.850.1,PB.850.2,PB.850.9,PB.850.11
Scaffold_1	Ppup046890	Ppup046890;A5:Scaffold_1:7263313-7263400:7263236-7263400:+	PB.856.9	PB.856.7,PB.856.9
Scaffold_1	Ppup043200	Ppup043200;A5:Scaffold_1:240326-242209:240326-242233:-	PB.647.2	PB.647.1,PB.647.2
Scaffold_1	Ppup043410_Ppup043400	Ppup043410_Ppup043400;A5:Scaffold_1:436050-439594:436050-439779:-	PB.660.7	PB.660.7,PB.660.2
Scaffold_1	Ppup043440	Ppup043440;A5:Scaffold_1:456309-456775:456309-457084:-	PB.663.1,PB.663.3,PB.663.16	PB.663.4,PB.663.1,PB.663.16,PB.663.3
Scaffold_1	Ppup043440	Ppup043440;A5:Scaffold_1:456309-456775:456309-457095:-	PB.663.1,PB.663.3,PB.663.16	PB.663.1,PB.663.11,PB.663.16,PB.663.3
Scaffold_1	Ppup043440	Ppup043440;A5:Scaffold_1:456309-457084:456309-457095:-	PB.663.4	PB.663.4,PB.663.11
Scaffold_1	Ppup043570	Ppup043570;A5:Scaffold_1:651737-651884:651737-652143:-	PB.677.2	PB.677.1,PB.677.7,PB.677.2
Scaffold_1	Ppup043830	Ppup043830;A5:Scaffold_1:1260546-1260688:1260546-1260766:-	PB.700.8	PB.700.8,PB.700.6,PB.700.11,PB.700.1,PB.700.5,PB.700.10,PB.700.12
Scaffold_1	Ppup044210	Ppup044210;A5:Scaffold_1:1921773-1922030:1921773-1922181:-	PB.718.2	PB.718.2,PB.718.4
Scaffold_1	Ppup044570	Ppup044570;A5:Scaffold_1:2352647-2352942:2352647-2352943:-	PB.734.2	PB.734.1,PB.734.2
Scaffold_1	Ppup044570	Ppup044570;A5:Scaffold_1:2358293-2359074:2358293-2359078:-	PB.734.2	PB.734.1,PB.734.2
Scaffold_1	Ppup045290	Ppup045290;A5:Scaffold_1:4255554-4255788:4255554-4255820:-	MSTRG.921.3	MSTRG.921.3,MSTRG.921.2
Scaffold_1	Ppup045430	Ppup045430;A5:Scaffold_1:4405490-4408204:4405490-4408335:-	PB.777.1,PB.777.6	PB.777.1,PB.777.6,PB.777.2
Scaffold_1	Ppup045430	Ppup045430;A5:Scaffold_1:4405490-4408204:4405490-4408451:-	PB.777.1,PB.777.6	PB.777.4,PB.777.1,PB.777.6
Scaffold_1	Ppup045430	Ppup045430;A5:Scaffold_1:4405490-4408335:4405490-4408451:-	PB.777.2	PB.777.4,PB.777.2
Scaffold_1	Ppup045540	Ppup045540;A5:Scaffold_1:4552912-4553554:4552912-4553560:-	PB.786.4	PB.786.3,PB.786.1,PB.786.4
Scaffold_1	Ppup045860	Ppup045860;A5:Scaffold_1:5074820-5083292:5074820-5083328:-	PB.803.2,PB.803.5,PB.803.11	PB.803.12,PB.803.11,PB.803.2,PB.803.5,PB.803.13
Scaffold_1	Ppup045890_Ppup045860	Ppup045890_Ppup045860;A5:Scaffold_1:5245526-5246286:5245526-5246315:-	PB.803.1,PB.803.18,PB.803.19,PB.803.23	PB.803.10,PB.803.1,PB.803.19,PB.803.18,PB.803.23
Scaffold_1	Ppup045890_Ppup045860	Ppup045890_Ppup045860;A5:Scaffold_1:5245526-5246038:5245526-5246286:-	PB.803.8	PB.803.1,PB.803.8,PB.803.19,PB.803.18,PB.803.23
Scaffold_1	Ppup045890_Ppup045860	Ppup045890_Ppup045860;A5:Scaffold_1:5245526-5246038:5245526-5246315:-	PB.803.8	PB.803.10,PB.803.8
Scaffold_1	Ppup045990	Ppup045990;A5:Scaffold_1:5690584-5691020:5690584-5691021:-	PB.808.2	PB.808.4,PB.808.2
Scaffold_1	Ppup046190	Ppup046190;A5:Scaffold_1:6097934-6098155:6097934-6098733:-	PB.821.7,PB.821.11	PB.821.11,PB.821.5,PB.821.9,PB.821.7,PB.821.8,PB.821.3
Scaffold_1	Ppup046730	Ppup046730;A5:Scaffold_1:7095472-7095551:7095472-7095927:-	PB.846.3	PB.846.3,PB.846.5,PB.846.2
Scaffold_1	Ppup046730	Ppup046730;A5:Scaffold_1:7095472-7095551:7095472-7095778:-	PB.846.3	PB.846.3,PB.846.4
Scaffold_1	Ppup046730	Ppup046730;A5:Scaffold_1:7095472-7095778:7095472-7095927:-	PB.846.4	PB.846.4,PB.846.5,PB.846.2
Scaffold_10	Ppup104020	Ppup104020;A5:Scaffold_10:942216-942287:942170-942287:+	PB.3495.7,PB.3495.8,PB.3495.4	PB.3495.1,PB.3495.7,PB.3495.6,PB.3495.4,PB.3495.8,PB.3495.3
Scaffold_10	Ppup104060	Ppup104060;A5:Scaffold_10:959765-960158:959748-960158:+	PB.3499.3	PB.3499.5,PB.3499.3
Scaffold_10	Ppup104060	Ppup104060;A5:Scaffold_10:959765-960158:958805-960158:+	PB.3499.3	PB.3499.9,PB.3499.3
Scaffold_10	Ppup104060	Ppup104060;A5:Scaffold_10:959748-960158:958805-960158:+	PB.3499.5	PB.3499.5,PB.3499.9
Scaffold_10	Ppup104210	Ppup104210;A5:Scaffold_10:1152444-1152525:1152388-1152525:+	PB.3511.8,PB.3511.1	PB.3511.1,PB.3511.5,PB.3511.8
Scaffold_10	Ppup104210	Ppup104210;A5:Scaffold_10:1152444-1152525:1152402-1152525:+	PB.3511.8,PB.3511.1	PB.3511.1,PB.3511.2,PB.3511.8
Scaffold_10	Ppup104210	Ppup104210;A5:Scaffold_10:1152402-1152525:1152388-1152525:+	PB.3511.2	PB.3511.2,PB.3511.5
Scaffold_10	Ppup104340	Ppup104340;A5:Scaffold_10:1398848-1399270:1398449-1399270:+	PB.3518.5	PB.3518.2,PB.3518.1,PB.3518.3,PB.3518.5,PB.3518.4
Scaffold_10	Ppup104490	Ppup104490;A5:Scaffold_10:1619737-1620573:1619725-1620573:+	PB.3532.2,PB.3532.5	PB.3532.3,PB.3532.6,PB.3532.2,PB.3532.5,PB.3532.1
Scaffold_10	Ppup104710	Ppup104710;A5:Scaffold_10:1883088-1883161:1883034-1883161:+	PB.3547.10,PB.3547.1,PB.3547.4,PB.3547.5	PB.3547.1,PB.3547.7,PB.3547.3,PB.3547.5,PB.3547.10,PB.3547.4
Scaffold_10	Ppup104760	Ppup104760;A5:Scaffold_10:1917862-1918656:1917560-1918656:+	PB.3550.5	PB.3550.5,PB.3550.1
Scaffold_10	Ppup104760	Ppup104760;A5:Scaffold_10:1917910-1918656:1917862-1918656:+	PB.3550.20,PB.3550.17	PB.3550.17,PB.3550.12,PB.3550.16,PB.3550.20,PB.3550.9,PB.3550.14,PB.3550.5,PB.3550.8
Scaffold_10	Ppup104760	Ppup104760;A5:Scaffold_10:1918320-1918656:1917862-1918656:+	PB.3550.21	PB.3550.21,PB.3550.12,PB.3550.16,PB.3550.9,PB.3550.14,PB.3550.5,PB.3550.8
Scaffold_10	Ppup104760	Ppup104760;A5:Scaffold_10:1918320-1918656:1917910-1918656:+	PB.3550.21	PB.3550.17,PB.3550.21,PB.3550.20
Scaffold_10	Ppup104760	Ppup104760;A5:Scaffold_10:1918320-1918656:1918123-1918656:+	PB.3550.21	PB.3550.22,PB.3550.21
Scaffold_10	Ppup104760	Ppup104760;A5:Scaffold_10:1918123-1918656:1917862-1918656:+	PB.3550.22	PB.3550.22,PB.3550.12,PB.3550.16,PB.3550.9,PB.3550.14,PB.3550.5,PB.3550.8
Scaffold_10	Ppup104760	Ppup104760;A5:Scaffold_10:1918123-1918656:1917910-1918656:+	PB.3550.22	PB.3550.22,PB.3550.17,PB.3550.20
Scaffold_10	novelGenePB.3602	novelGenePB.3602;A5:Scaffold_10:2578698-2578807:2578625-2578807:+	PB.3602.1	PB.3602.2,PB.3602.4,PB.3602.1,PB.3602.3
Scaffold_10	Ppup105470	Ppup105470;A5:Scaffold_10:2627976-2628236:2627967-2628236:+	PB.3606.2,PB.3606.5,PB.3606.4	PB.3606.5,PB.3606.2,PB.3606.3,PB.3606.4
Scaffold_10	Ppup105480	Ppup105480;A5:Scaffold_10:2631650-2633132:2631639-2633132:+	MSTRG.1257.2	MSTRG.1257.1,MSTRG.1257.2
Scaffold_10	Ppup105870	Ppup105870;A5:Scaffold_10:3531537-3531612:3531532-3531612:+	PB.3635.52	PB.3635.52,PB.3635.30
Scaffold_10	Ppup105870_Ppup105880	Ppup105870_Ppup105880;A5:Scaffold_10:3539069-3539136:3539053-3539136:+	PB.3635.16,PB.3635.17,PB.3635.37,PB.3635.40,PB.3635.42,PB.3635.43,PB.3635.44,PB.3635.62	PB.3635.40,PB.3635.37,PB.3635.44,PB.3635.43,PB.3635.3,PB.3635.17,PB.3635.36,PB.3635.42,PB.3635.16,PB.3635.62
Scaffold_10	Ppup105870_Ppup105880	Ppup105870_Ppup105880;A5:Scaffold_10:3538296-3538392:3538291-3538392:+	PB.3635.62	PB.3635.40,PB.3635.37,PB.3635.44,PB.3635.3,PB.3635.17,PB.3635.36,PB.3635.9,PB.3635.42,PB.3635.16,PB.3635.8,PB.3635.62,PB.3635.41
Scaffold_10	Ppup105880	Ppup105880;A5:Scaffold_10:3536555-3538166:3535178-3538166:+	PB.3635.71	PB.3635.71,PB.3635.72
Scaffold_10	Ppup106230	Ppup106230;A5:Scaffold_10:3970098-3971650:3969739-3971650:+	PB.3667.6,PB.3667.3	PB.3667.3,PB.3667.6,PB.3667.4
Scaffold_10	Ppup106350	Ppup106350;A5:Scaffold_10:4016105-4016186:4016066-4016186:+	PB.3676.4	PB.3676.8,PB.3676.4
Scaffold_10	Ppup106640	Ppup106640;A5:Scaffold_10:4273558-4274204:4273539-4274204:+	PB.3687.1	PB.3687.2,PB.3687.1
Scaffold_10	Ppup106640	Ppup106640;A5:Scaffold_10:4274130-4274204:4273765-4274204:+	PB.3687.4	PB.3687.5,PB.3687.4
Scaffold_10	Ppup106640	Ppup106640;A5:Scaffold_10:4274130-4274204:4274079-4274204:+	PB.3687.4	PB.3687.4,PB.3687.6
Scaffold_10	Ppup106660	Ppup106660;A5:Scaffold_10:4280885-4281347:4280584-4281347:+	PB.3688.1,PB.3688.2,PB.3688.4	PB.3688.4,PB.3688.5,PB.3688.1,PB.3688.2
Scaffold_10	Ppup106780_Ppup106760	Ppup106780_Ppup106760;A5:Scaffold_10:4364474-4364566:4364377-4364566:+	PB.3693.5	PB.3693.1,PB.3693.5
Scaffold_10	novelGeneAS031	novelGeneAS031;A5:Scaffold_10:920336-920553:920336-920985:-	MSTRG.1125.11	MSTRG.1125.11,MSTRG.1125.4
Scaffold_10	novelGeneAS031	novelGeneAS031;A5:Scaffold_10:918608-920553:918608-920661:-	MSTRG.1125.12	MSTRG.1125.2,MSTRG.1125.12
Scaffold_10	novelGeneAS031	novelGeneAS031;A5:Scaffold_10:918284-919905:918284-920553:-	MSTRG.1125.13	MSTRG.1125.13,MSTRG.1125.6
Scaffold_10	novelGeneAS031	novelGeneAS031;A5:Scaffold_10:920984-921093:920984-921201:-	MSTRG.1125.13,MSTRG.1125.8	MSTRG.1125.2,MSTRG.1125.12,MSTRG.1125.13,MSTRG.1125.14,MSTRG.1125.8
Scaffold_10	novelGeneAS031	novelGeneAS031;A5:Scaffold_10:920444-920553:920444-920985:-	MSTRG.1125.3	MSTRG.1125.3,MSTRG.1125.16
Scaffold_10	novelGeneAS031	novelGeneAS031;A5:Scaffold_10:920768-920985:920768-921201:-	MSTRG.1125.7	MSTRG.1125.7,MSTRG.1125.6
Scaffold_10	novelGeneAS031	novelGeneAS031;A5:Scaffold_10:920768-920877:920768-920985:-	MSTRG.1125.9	MSTRG.1125.15,MSTRG.1125.7,MSTRG.1125.9
Scaffold_10	Ppup104050	Ppup104050;A5:Scaffold_10:950788-951097:950788-952084:-	PB.3498.1,PB.3498.4	PB.3498.1,PB.3498.2,PB.3498.5,PB.3498.4
Scaffold_10	Ppup104480	Ppup104480;A5:Scaffold_10:1618190-1618397:1618190-1618433:-	PB.3531.4	PB.3531.3,PB.3531.7,PB.3531.1,PB.3531.9,PB.3531.4,PB.3531.5
Scaffold_10	Ppup104620	Ppup104620;A5:Scaffold_10:1738273-1738496:1738273-1738552:-	MSTRG.1187.3	MSTRG.1187.4,MSTRG.1187.3
Scaffold_10	Ppup105060_Ppup105070	Ppup105060_Ppup105070;A5:Scaffold_10:2298769-2299268:2298769-2299273:-	PB.3577.5	PB.3577.5,PB.3577.2
Scaffold_10	Ppup105060_Ppup105070	Ppup105060_Ppup105070;A5:Scaffold_10:2298769-2299051:2298769-2299273:-	PB.3577.7	PB.3577.2,PB.3577.7
Scaffold_10	Ppup105060_Ppup105070	Ppup105060_Ppup105070;A5:Scaffold_10:2298769-2299051:2298769-2299268:-	PB.3577.7	PB.3577.5,PB.3577.7
Scaffold_10	Ppup105580	Ppup105580;A5:Scaffold_10:2798267-2799158:2798267-2799482:-	PB.3611.2,PB.3611.1,PB.3611.5,PB.3611.3,PB.3611.6	PB.3611.3,PB.3611.6,PB.3611.2,PB.3611.1,PB.3611.4,PB.3611.5
Scaffold_10	Ppup105580	Ppup105580;A5:Scaffold_10:2798267-2799135:2798267-2799158:-	PB.3611.7	PB.3611.3,PB.3611.6,PB.3611.2,PB.3611.1,PB.3611.7,PB.3611.5
Scaffold_10	Ppup105800	Ppup105800;A5:Scaffold_10:3335715-3339890:3335715-3340034:-	PB.3630.4,PB.3630.8,PB.3630.13,PB.3630.16,PB.3630.19,PB.3630.21,PB.3630.34	PB.3630.4,PB.3630.35,PB.3630.13,PB.3630.34,PB.3630.19,PB.3630.8,PB.3630.11,PB.3630.16,PB.3630.3,PB.3630.22,PB.3630.21,PB.3630.5,PB.3630.9,PB.3630.2
Scaffold_10	Ppup105800	Ppup105800;A5:Scaffold_10:3340167-3341016:3340167-3341107:-	PB.3630.16	PB.3630.13,PB.3630.40,PB.3630.19,PB.3630.8,PB.3630.16,PB.3630.21,PB.3630.20,PB.3630.2,PB.3630.4,PB.3630.24,PB.3630.35,PB.3630.9,PB.3630.29,PB.3630.3,PB.3630.5,PB.3630.30,PB.3630.34,PB.3630.11,PB.3630.22
Scaffold_10	Ppup105800	Ppup105800;A5:Scaffold_10:3335014-3339890:3335014-3340034:-	PB.3630.24,PB.3630.29,PB.3630.40	PB.3630.24,PB.3630.30,PB.3630.40,PB.3630.29,PB.3630.38,PB.3630.20
Scaffold_10	Ppup105800	Ppup105800;A5:Scaffold_10:3335014-3340034:3335014-3341016:-	PB.3630.38	PB.3630.31,PB.3630.38
Scaffold_10	Ppup105890	Ppup105890;A5:Scaffold_10:3544615-3544921:3544615-3545448:-	PB.3636.7	PB.3636.9,PB.3636.7,PB.3636.15,PB.3636.1
Scaffold_10	Ppup105980	Ppup105980;A5:Scaffold_10:3603614-3604725:3603614-3605156:-	PB.3644.9	PB.3644.9,PB.3644.4,PB.3644.1,PB.3644.13
Scaffold_10	Ppup106040_Ppup106020	Ppup106040_Ppup106020;A5:Scaffold_10:3715422-3715951:3715422-3716005:-	PB.3650.2	PB.3650.2,PB.3650.8,PB.3650.1
Scaffold_10	Ppup106040_Ppup106020	Ppup106040_Ppup106020;A5:Scaffold_10:3751809-3753363:3751809-3753643:-	PB.3650.8	PB.3650.2,PB.3650.8,PB.3650.1
Scaffold_10	Ppup106040	Ppup106040;A5:Scaffold_10:3751809-3753363:3751809-3753643:-	PB.3650.15,PB.3650.17	PB.3650.18,PB.3650.17,PB.3650.14,PB.3650.20,PB.3650.15
Scaffold_10	Ppup106040	Ppup106040;A5:Scaffold_10:3715422-3715951:3715422-3716005:-	PB.3650.17,PB.3650.20	PB.3650.18,PB.3650.17,PB.3650.20,PB.3650.15,PB.3650.21
Scaffold_10	Ppup106190	Ppup106190;A5:Scaffold_10:3841321-3842551:3841321-3842572:-	PB.3664.1,PB.3664.13,PB.3664.15,PB.3664.6,PB.3664.7,PB.3664.16,PB.3664.19,PB.3664.21,PB.3664.23,PB.3664.25,PB.3664.32,PB.3664.33,PB.3664.36,PB.3664.37	PB.3664.28,PB.3664.15,PB.3664.17,PB.3664.24,PB.3664.22,PB.3664.7,PB.3664.33,PB.3664.16,PB.3664.6,PB.3664.20,PB.3664.32,PB.3664.36,PB.3664.13,PB.3664.30,PB.3664.37,PB.3664.23,PB.3664.25,PB.3664.39,PB.3664.12,PB.3664.1,PB.3664.14,PB.3664.19,PB.3664.9,PB.3664.21,PB.3664.2
Scaffold_10	Ppup106470	Ppup106470;A5:Scaffold_10:4064709-4064777:4064709-4064842:-	PB.3694.14	PB.3694.15,PB.3694.14
Scaffold_10	Ppup106520	Ppup106520;A5:Scaffold_10:4222740-4222843:4222740-4223189:-	PB.3694.32	PB.3694.28,PB.3694.33,PB.3694.23,PB.3694.32
Scaffold_10	novelGenePB.3694	novelGenePB.3694;A5:Scaffold_10:4352019-4352129:4352019-4352132:-	PB.3694.58,PB.3694.62	PB.3694.60,PB.3694.62,PB.3694.58
Scaffold_10	Ppup106570	Ppup106570;A5:Scaffold_10:4250309-4250415:4250309-4250612:-	PB.3694.41	PB.3694.42,PB.3694.39,PB.3694.41
Scaffold_101	Ppup074720	Ppup074720;A5:Scaffold_101:70792-70864:70792-70895:-	PB.6656.4	PB.6656.1,PB.6656.5,PB.6656.7,PB.6656.8,PB.6656.3,PB.6656.6,PB.6656.4
Scaffold_101	Ppup074880	Ppup074880;A5:Scaffold_101:183309-183378:183309-184328:-	PB.6672.2	PB.6672.3,PB.6672.2,PB.6672.5
Scaffold_101	Ppup074930	Ppup074930;A5:Scaffold_101:211486-211878:211486-212263:-	PB.6676.12	PB.6676.7,PB.6676.12,PB.6676.9
Scaffold_101	Ppup074960	Ppup074960;A5:Scaffold_101:225085-225194:225085-225200:-	PB.6679.6,PB.6679.2,PB.6679.8,PB.6679.10,PB.6679.22,PB.6679.23	PB.6679.1,PB.6679.2,PB.6679.6,PB.6679.13,PB.6679.23,PB.6679.10,PB.6679.22,PB.6679.8,PB.6679.12,PB.6679.14
Scaffold_101	Ppup074960	Ppup074960;A5:Scaffold_101:225085-225194:225085-225196:-	PB.6679.6,PB.6679.2,PB.6679.8,PB.6679.10,PB.6679.22,PB.6679.23	PB.6679.2,PB.6679.6,PB.6679.23,PB.6679.20,PB.6679.10,PB.6679.22,PB.6679.8
Scaffold_101	Ppup074960	Ppup074960;A5:Scaffold_101:227210-227877:227210-228009:-	PB.6679.10	PB.6679.20,PB.6679.10
Scaffold_101	Ppup074960	Ppup074960;A5:Scaffold_101:225085-225196:225085-225200:-	PB.6679.20	PB.6679.13,PB.6679.20,PB.6679.1,PB.6679.12,PB.6679.14
Scaffold_101	Ppup075260	Ppup075260;A5:Scaffold_101:476659-480561:476659-480672:-	PB.6702.18	PB.6702.5,PB.6702.4,PB.6702.18
Scaffold_101	Ppup075330	Ppup075330;A5:Scaffold_101:531980-533859:531980-534045:-	PB.6707.29	PB.6707.40,PB.6707.29,PB.6707.17,PB.6707.15,PB.6707.31,PB.6707.43,PB.6707.38,PB.6707.5
Scaffold_101	Ppup075540	Ppup075540;A5:Scaffold_101:694181-694800:694181-695031:-	PB.6725.12	PB.6725.12,PB.6725.11
Scaffold_101	Ppup075540	Ppup075540;A5:Scaffold_101:694181-694800:694181-694991:-	PB.6725.12	PB.6725.13,PB.6725.12
Scaffold_101	Ppup075540	Ppup075540;A5:Scaffold_101:694181-694991:694181-695031:-	PB.6725.13	PB.6725.13,PB.6725.11
Scaffold_101	Ppup075720	Ppup075720;A5:Scaffold_101:793500-794249:793500-794271:-	MSTRG.1502.1	MSTRG.1502.1,MSTRG.1502.2
Scaffold_101	Ppup075750	Ppup075750;A5:Scaffold_101:803292-803365:803292-803374:-	PB.6745.4,PB.6745.5	PB.6745.9,PB.6745.2,PB.6745.6,PB.6745.5,PB.6745.4
Scaffold_101	Ppup075750	Ppup075750;A5:Scaffold_101:803292-803361:803292-803365:-	PB.6745.7	PB.6745.5,PB.6745.4,PB.6745.7
Scaffold_101	Ppup075750	Ppup075750;A5:Scaffold_101:803292-803361:803292-803374:-	PB.6745.7	PB.6745.2,PB.6745.6,PB.6745.9,PB.6745.7
Scaffold_101	Ppup075920	Ppup075920;A5:Scaffold_101:888972-889158:888972-889168:-	PB.6753.9,PB.6753.14,PB.6753.7,PB.6753.22,PB.6753.21	PB.6753.9,PB.6753.8,PB.6753.14,PB.6753.30,PB.6753.7,PB.6753.21,PB.6753.22
Scaffold_101	Ppup075920	Ppup075920;A5:Scaffold_101:888972-889158:888972-889159:-	PB.6753.9,PB.6753.14,PB.6753.7,PB.6753.22,PB.6753.21	PB.6753.9,PB.6753.14,PB.6753.7,PB.6753.21,PB.6753.20,PB.6753.22
Scaffold_101	Ppup075920	Ppup075920;A5:Scaffold_101:894632-904304:894632-904308:-	PB.6753.5,PB.6753.7,PB.6753.18,PB.6753.30	PB.6753.20,PB.6753.30,PB.6753.7,PB.6753.5,PB.6753.2,PB.6753.18,PB.6753.17
Scaffold_101	Ppup075920	Ppup075920;A5:Scaffold_101:888972-889159:888972-889168:-	PB.6753.20	PB.6753.20,PB.6753.8,PB.6753.30
Scaffold_101	Ppup076010	Ppup076010;A5:Scaffold_101:964363-964631:964363-964704:-	PB.6760.1,PB.6760.2,PB.6760.4	PB.6760.1,PB.6760.2,PB.6760.4,PB.6760.6
Scaffold_101	Ppup076010	Ppup076010;A5:Scaffold_101:964708-965596:964708-965862:-	PB.6760.1	PB.6760.1,PB.6760.2,PB.6760.4
Scaffold_101	Ppup076010	Ppup076010;A5:Scaffold_101:968124-968245:968124-968289:-	PB.6760.2	PB.6760.3,PB.6760.7,PB.6760.2
Scaffold_101	Ppup076060	Ppup076060;A5:Scaffold_101:995476-996577:995476-996594:-	PB.6764.2	PB.6764.3,PB.6764.2
Scaffold_101	Ppup076060	Ppup076060;A5:Scaffold_101:995476-996565:995476-996577:-	PB.6764.4	PB.6764.4,PB.6764.2
Scaffold_101	Ppup076060	Ppup076060;A5:Scaffold_101:995476-996565:995476-996594:-	PB.6764.4	PB.6764.3,PB.6764.4
Scaffold_101	Ppup076240	Ppup076240;A5:Scaffold_101:1140952-1141281:1140952-1141508:-	PB.6780.3	PB.6780.3,PB.6780.2
Scaffold_101	Ppup076290	Ppup076290;A5:Scaffold_101:1163810-1163917:1163810-1163999:-	PB.6783.1	PB.6783.4,PB.6783.1
Scaffold_101	Ppup076290	Ppup076290;A5:Scaffold_101:1163810-1163999:1163810-1164222:-	PB.6783.4	PB.6783.4,PB.6783.2
Scaffold_101	Ppup074750	Ppup074750;A5:Scaffold_101:95319-95952:95252-95952:+	PB.6659.1,PB.6659.2,PB.6659.4	PB.6659.4,PB.6659.2,PB.6659.3,PB.6659.1
Scaffold_101	Ppup075110	Ppup075110;A5:Scaffold_101:353268-353350:353264-353350:+	MSTRG.1445.2	MSTRG.1445.1,MSTRG.1445.2
Scaffold_101	Ppup075160	Ppup075160;A5:Scaffold_101:372764-374388:372680-374388:+	PB.6692.2	PB.6692.2,PB.6692.3,PB.6692.1
Scaffold_101	Ppup075190	Ppup075190;A5:Scaffold_101:398400-399535:398328-399535:+	PB.6694.21	PB.6694.5,PB.6694.7,PB.6694.1,PB.6694.21,PB.6694.2
Scaffold_101	Ppup075380	Ppup075380;A5:Scaffold_101:565097-570031:565028-570031:+	PB.6712.3	PB.6712.3,PB.6712.1
Scaffold_101	Ppup075450	Ppup075450;A5:Scaffold_101:617563-617896:617506-617896:+	PB.6720.6	PB.6720.5,PB.6720.4,PB.6720.6,PB.6720.3
Scaffold_101	Ppup075550	Ppup075550;A5:Scaffold_101:696855-696923:696748-696923:+	PB.6726.1,PB.6726.2,PB.6726.5	PB.6726.2,PB.6726.5,PB.6726.4,PB.6726.1,PB.6726.3
Scaffold_101	Ppup075580	Ppup075580;A5:Scaffold_101:718843-718942:718822-718942:+	PB.6729.1,PB.6729.5	PB.6729.3,PB.6729.1,PB.6729.5,PB.6729.6
Scaffold_101	Ppup075690	Ppup075690;A5:Scaffold_101:779864-780224:779847-780224:+	PB.6740.11,PB.6740.20	PB.6740.26,PB.6740.10,PB.6740.14,PB.6740.17,PB.6740.11,PB.6740.20,PB.6740.6
Scaffold_101	Ppup075690	Ppup075690;A5:Scaffold_101:779532-779753:779436-779753:+	PB.6740.17	PB.6740.14,PB.6740.17
Scaffold_101	Ppup075690	Ppup075690;A5:Scaffold_101:779343-779410:779339-779410:+	PB.6740.2	PB.6740.3,PB.6740.14,PB.6740.17,PB.6740.2,PB.6740.19
Scaffold_101	Ppup075690	Ppup075690;A5:Scaffold_101:779532-780224:779436-780224:+	PB.6740.19,PB.6740.21	PB.6740.3,PB.6740.23,PB.6740.21,PB.6740.2,PB.6740.19
Scaffold_101	Ppup075690	Ppup075690;A5:Scaffold_101:779532-780224:779339-780224:+	PB.6740.21	PB.6740.12,PB.6740.7,PB.6740.21,PB.6740.18
Scaffold_101	Ppup075690	Ppup075690;A5:Scaffold_101:779436-780224:779339-780224:+	PB.6740.23	PB.6740.12,PB.6740.23,PB.6740.7,PB.6740.18
Scaffold_101	Ppup075690	Ppup075690;A5:Scaffold_101:779726-780224:779532-780224:+	PB.6740.25	PB.6740.21,PB.6740.19,PB.6740.25
Scaffold_103	Ppup096380	Ppup096380;A5:Scaffold_103:149983-150116:149983-150128:-	PB.6800.4	PB.6800.2,PB.6800.4,PB.6800.1
Scaffold_103	Ppup096450	Ppup096450;A5:Scaffold_103:300936-301069:300936-301073:-	PB.6808.2	PB.6808.1,PB.6808.2
Scaffold_103	Ppup096810	Ppup096810;A5:Scaffold_103:661206-662547:661206-662553:-	PB.6841.1	PB.6841.1,PB.6841.2
Scaffold_103	Ppup096980	Ppup096980;A5:Scaffold_103:829436-829533:829436-830097:-	PB.6850.8	PB.6850.5,PB.6850.8,PB.6850.18
Scaffold_103	Ppup096980	Ppup096980;A5:Scaffold_103:829436-830205:829436-830427:-	PB.6850.4	PB.6850.4,PB.6850.3,PB.6850.10
Scaffold_103	Ppup096980	Ppup096980;A5:Scaffold_103:829436-830205:829436-830342:-	PB.6850.4	PB.6850.4,PB.6850.7
Scaffold_103	Ppup096980	Ppup096980;A5:Scaffold_103:829436-830427:829436-830598:-	PB.6850.3,PB.6850.10	PB.6850.2,PB.6850.3,PB.6850.10
Scaffold_103	Ppup096980	Ppup096980;A5:Scaffold_103:829436-830342:829436-830427:-	PB.6850.7	PB.6850.7,PB.6850.3,PB.6850.10
Scaffold_103	Ppup096980	Ppup096980;A5:Scaffold_103:829436-830342:829436-830598:-	PB.6850.7	PB.6850.7,PB.6850.2
Scaffold_103	Ppup097110	Ppup097110;A5:Scaffold_103:1236442-1241816:1236442-1245774:-	PB.6858.1	PB.6858.3,PB.6858.1
Scaffold_103	Ppup096400	Ppup096400;A5:Scaffold_103:217710-217816:217642-217816:+	PB.6802.2,PB.6802.11	PB.6802.9,PB.6802.2,PB.6802.11
Scaffold_103	Ppup096400	Ppup096400;A5:Scaffold_103:215857-215942:215746-215942:+	PB.6802.7	PB.6802.1,PB.6802.7
Scaffold_103	Ppup096410	Ppup096410;A5:Scaffold_103:220020-222531:220006-222531:+	PB.6803.4	PB.6803.4,PB.6803.8,PB.6803.3
Scaffold_103	Ppup096410	Ppup096410;A5:Scaffold_103:222795-222879:222790-222879:+	PB.6803.7	PB.6803.4,PB.6803.7,PB.6803.9,PB.6803.8,PB.6803.3
Scaffold_103	Ppup096620	Ppup096620;A5:Scaffold_103:489334-489473:489159-489473:+	PB.6818.7	PB.6818.6,PB.6818.7,PB.6818.14,PB.6818.13,PB.6818.4,PB.6818.10,PB.6818.15
Scaffold_103	Ppup096620	Ppup096620;A5:Scaffold_103:486480-489065:485808-489065:+	PB.6818.14	PB.6818.13,PB.6818.14
Scaffold_103	Ppup096760	Ppup096760;A5:Scaffold_103:606033-607152:606030-607152:+	PB.6832.2,PB.6832.7	PB.6832.11,PB.6832.7,PB.6832.2,PB.6832.5,PB.6832.10
Scaffold_103	Ppup096950	Ppup096950;A5:Scaffold_103:818596-818725:818446-818725:+	PB.6847.3,PB.6847.5	PB.6847.5,PB.6847.1,PB.6847.3
Scaffold_105	novelGeneAS042	novelGeneAS042;A5:Scaffold_105:3729-94887:3729-95092:-	MSTRG.1648.1	MSTRG.1648.1,MSTRG.1648.2
Scaffold_111	Ppup029840	Ppup029840;A5:Scaffold_111:4408-4493:4316-4493:+	PB.6883.2	PB.6883.2,PB.6883.5
Scaffold_111	Ppup029910	Ppup029910;A5:Scaffold_111:23060-23290:22869-23290:+	PB.6888.3	PB.6888.1,PB.6888.3
Scaffold_111	Ppup030250	Ppup030250;A5:Scaffold_111:515762-516830:515762-516901:-	PB.6911.7	PB.6911.2,PB.6911.9,PB.6911.5,PB.6911.8,PB.6911.10,PB.6911.7
Scaffold_111	novelGenePB.6914	novelGenePB.6914;A5:Scaffold_111:809319-809520:809319-809547:-	PB.6914.10	PB.6914.4,PB.6914.10
Scaffold_118	Ppup097650	Ppup097650;A5:Scaffold_118:361463-361964:361463-362129:-	PB.6945.2	PB.6945.10,PB.6945.1,PB.6945.2
Scaffold_118	Ppup097650	Ppup097650;A5:Scaffold_118:361463-361964:361463-362074:-	PB.6945.2	PB.6945.9,PB.6945.2,PB.6945.6
Scaffold_118	Ppup097650	Ppup097650;A5:Scaffold_118:361463-361785:361463-362129:-	PB.6945.4	PB.6945.10,PB.6945.1,PB.6945.4
Scaffold_118	Ppup097650	Ppup097650;A5:Scaffold_118:361463-361785:361463-361964:-	PB.6945.4	PB.6945.2,PB.6945.4
Scaffold_118	Ppup097650	Ppup097650;A5:Scaffold_118:361463-361785:361463-361845:-	PB.6945.4	PB.6945.5,PB.6945.8,PB.6945.4
Scaffold_118	Ppup097650	Ppup097650;A5:Scaffold_118:361463-361785:361463-362074:-	PB.6945.4	PB.6945.9,PB.6945.4,PB.6945.6
Scaffold_118	Ppup097650	Ppup097650;A5:Scaffold_118:361463-361845:361463-362129:-	PB.6945.5,PB.6945.8	PB.6945.5,PB.6945.1,PB.6945.8,PB.6945.10
Scaffold_118	Ppup097650	Ppup097650;A5:Scaffold_118:361463-361845:361463-361964:-	PB.6945.5,PB.6945.8	PB.6945.5,PB.6945.8,PB.6945.2
Scaffold_118	Ppup097650	Ppup097650;A5:Scaffold_118:361463-361845:361463-362074:-	PB.6945.5,PB.6945.8	PB.6945.9,PB.6945.5,PB.6945.8,PB.6945.6
Scaffold_118	Ppup097650	Ppup097650;A5:Scaffold_118:361463-362074:361463-362129:-	PB.6945.6,PB.6945.9	PB.6945.9,PB.6945.10,PB.6945.1,PB.6945.6
Scaffold_118	Ppup097670	Ppup097670;A5:Scaffold_118:376189-376510:376189-376519:-	PB.6948.2	PB.6948.1,PB.6948.2
Scaffold_118	Ppup097750	Ppup097750;A5:Scaffold_118:412966-413221:412966-413370:-	PB.6953.15	PB.6953.15,PB.6953.14
Scaffold_118	Ppup097750	Ppup097750;A5:Scaffold_118:412966-413221:412966-414193:-	PB.6953.15	PB.6953.15,PB.6953.8
Scaffold_118	Ppup097780	Ppup097780;A5:Scaffold_118:429727-429894:429727-430408:-	PB.6956.10	PB.6956.10,PB.6956.4
Scaffold_118	Ppup098380	Ppup098380;A5:Scaffold_118:1438715-1438957:1438715-1439110:-	PB.6997.1	PB.6997.1,PB.6997.2
Scaffold_118	Ppup098430	Ppup098430;A5:Scaffold_118:1464158-1464423:1464158-1464578:-	PB.6999.1,PB.6999.4,PB.6999.7	PB.6999.3,PB.6999.4,PB.6999.5,PB.6999.1,PB.6999.7,PB.6999.8
Scaffold_118	Ppup097320	Ppup097320;A5:Scaffold_118:20436-21909:20072-21909:+	PB.6925.1,PB.6925.3	PB.6925.1,PB.6925.4,PB.6925.3
Scaffold_118	Ppup097320	Ppup097320;A5:Scaffold_118:22449-23112:22443-23112:+	PB.6925.1	PB.6925.1,PB.6925.4,PB.6925.3
Scaffold_118	Ppup097400	Ppup097400;A5:Scaffold_118:83856-84928:83823-84928:+	MSTRGVenom.1404.1	MSTRGVenom.1404.2,MSTRGVenom.1404.1
Scaffold_118	Ppup097400	Ppup097400;A5:Scaffold_118:83979-84928:83823-84928:+	MSTRGVenom.1404.3	MSTRGVenom.1404.2,MSTRGVenom.1404.3
Scaffold_118	Ppup097400	Ppup097400;A5:Scaffold_118:83979-84928:83856-84928:+	MSTRGVenom.1404.3	MSTRGVenom.1404.3,MSTRGVenom.1404.1
Scaffold_118	Ppup097470	Ppup097470;A5:Scaffold_118:143838-144375:143650-144375:+	PB.6934.2	PB.6934.4,PB.6934.2,PB.6934.5
Scaffold_118	Ppup097470	Ppup097470;A5:Scaffold_118:143838-144375:143694-144375:+	PB.6934.2	PB.6934.3,PB.6934.2
Scaffold_118	Ppup097470	Ppup097470;A5:Scaffold_118:143989-144375:143838-144375:+	PB.6934.1,PB.6934.7,PB.6934.8	PB.6934.1,PB.6934.8,PB.6934.2,PB.6934.7
Scaffold_118	Ppup097470	Ppup097470;A5:Scaffold_118:143989-144375:143650-144375:+	PB.6934.1,PB.6934.7	PB.6934.1,PB.6934.5,PB.6934.4,PB.6934.7
Scaffold_118	Ppup097470	Ppup097470;A5:Scaffold_118:143989-144375:143694-144375:+	PB.6934.1,PB.6934.7	PB.6934.1,PB.6934.3,PB.6934.7
Scaffold_118	Ppup097470	Ppup097470;A5:Scaffold_118:143694-144375:143650-144375:+	PB.6934.3	PB.6934.4,PB.6934.3,PB.6934.5
Scaffold_118	Ppup097680	Ppup097680;A5:Scaffold_118:381993-382883:381955-382883:+	PB.6949.2,PB.6949.6,PB.6949.8,PB.6949.4,PB.6949.5	PB.6949.6,PB.6949.2,PB.6949.3,PB.6949.4,PB.6949.5,PB.6949.9,PB.6949.7,PB.6949.8
Scaffold_118	Ppup097870	Ppup097870;A5:Scaffold_118:498537-498724:498482-498724:+	PB.6961.3	PB.6961.2,PB.6961.3
Scaffold_118	Ppup098110	Ppup098110;A5:Scaffold_118:959521-965351:959442-965351:+	PB.6978.3	PB.6978.3,PB.6978.4
Scaffold_118	Ppup098360	Ppup098360;A5:Scaffold_118:1408815-1409316:1407590-1409316:+	PB.6996.1	PB.6996.1,PB.6996.6
Scaffold_118	Ppup098360	Ppup098360;A5:Scaffold_118:1408046-1408531:1407590-1408531:+	PB.6996.7	PB.6996.4,PB.6996.2,PB.6996.7
Scaffold_118	Ppup098420	Ppup098420;A5:Scaffold_118:1457355-1457931:1456605-1457931:+	PB.6998.3	PB.6998.3,PB.6998.2
Scaffold_119	Ppup069270	Ppup069270;A5:Scaffold_119:539430-541789:539430-541873:-	PB.7020.2	PB.7020.1,PB.7020.2
Scaffold_119	Ppup069270	Ppup069270;A5:Scaffold_119:539430-541789:539430-541820:-	PB.7020.2	PB.7020.4,PB.7020.2
Scaffold_119	Ppup069270	Ppup069270;A5:Scaffold_119:539430-541661:539430-541873:-	PB.7020.3	PB.7020.1,PB.7020.3
Scaffold_119	Ppup069270	Ppup069270;A5:Scaffold_119:539430-541661:539430-541789:-	PB.7020.3	PB.7020.2,PB.7020.3
Scaffold_119	Ppup069270	Ppup069270;A5:Scaffold_119:539430-541661:539430-541820:-	PB.7020.3	PB.7020.4,PB.7020.3
Scaffold_119	Ppup069270	Ppup069270;A5:Scaffold_119:539430-541820:539430-541873:-	PB.7020.4	PB.7020.4,PB.7020.1
Scaffold_119	Ppup069450	Ppup069450;A5:Scaffold_119:636397-636474:636397-636659:-	PB.7034.1	PB.7034.1,PB.7034.2
Scaffold_119	Ppup069510	Ppup069510;A5:Scaffold_119:650404-650674:650382-650674:+	PB.7040.2	PB.7040.3,PB.7040.2
Scaffold_119	Ppup069510	Ppup069510;A5:Scaffold_119:657158-658015:657155-658015:+	PB.7040.4	PB.7040.1,PB.7040.2,PB.7040.3,PB.7040.5,PB.7040.4
Scaffold_119	Ppup069530	Ppup069530;A5:Scaffold_119:699051-699386:699015-699386:+	PB.7043.2	PB.7043.1,PB.7043.2
Scaffold_12	Ppup015110	Ppup015110;A5:Scaffold_12:314651-352969:314040-352969:+	PB.3703.10,PB.3703.3	PB.3703.3,PB.3703.10,PB.3703.5,PB.3703.7,PB.3703.1
Scaffold_12	Ppup015110	Ppup015110;A5:Scaffold_12:314040-314493:313735-314493:+	PB.3703.13,PB.3703.12	PB.3703.13,PB.3703.11,PB.3703.12
Scaffold_12	Ppup015110	Ppup015110;A5:Scaffold_12:314233-314493:314040-314493:+	PB.3703.4,PB.3703.6	PB.3703.13,PB.3703.12,PB.3703.4,PB.3703.6
Scaffold_12	Ppup015110	Ppup015110;A5:Scaffold_12:314233-314493:313735-314493:+	PB.3703.4	PB.3703.11,PB.3703.4
Scaffold_120	Ppup107050	Ppup107050;A5:Scaffold_120:27996-113776:27996-113997:-	MSTRG.1982.1	MSTRG.1982.2,MSTRG.1982.1
Scaffold_122	Ppup076850	Ppup076850;A5:Scaffold_122:72392-73845:72375-73845:+	PB.7064.1	PB.7064.1,PB.7064.4
Scaffold_122	Ppup076890	Ppup076890;A5:Scaffold_122:115532-116237:115514-116237:+	PB.7065.3	PB.7065.3,PB.7065.6
Scaffold_122	Ppup076890	Ppup076890;A5:Scaffold_122:115757-116237:115532-116237:+	PB.7065.4	PB.7065.3,PB.7065.4
Scaffold_122	Ppup076890	Ppup076890;A5:Scaffold_122:115757-116237:115514-116237:+	PB.7065.4	PB.7065.4,PB.7065.6
Scaffold_122	Ppup076890	Ppup076890;A5:Scaffold_122:115757-116237:115600-116237:+	PB.7065.4	PB.7065.8,PB.7065.4,PB.7065.7
Scaffold_122	Ppup076890	Ppup076890;A5:Scaffold_122:115600-116237:115532-116237:+	PB.7065.7,PB.7065.8	PB.7065.8,PB.7065.3,PB.7065.7
Scaffold_122	Ppup076890	Ppup076890;A5:Scaffold_122:115600-116237:115514-116237:+	PB.7065.7,PB.7065.8	PB.7065.8,PB.7065.6,PB.7065.7
Scaffold_122	Ppup076900	Ppup076900;A5:Scaffold_122:152079-152284:152064-152284:+	PB.7068.5,PB.7068.9,PB.7068.11,PB.7068.13,PB.7068.21,PB.7068.18	PB.7068.5,PB.7068.9,PB.7068.18,PB.7068.11,PB.7068.15,PB.7068.13,PB.7068.14,PB.7068.23,PB.7068.2,PB.7068.19,PB.7068.21,PB.7068.12
Scaffold_122	Ppup077110	Ppup077110;A5:Scaffold_122:335718-336148:335707-336148:+	PB.7083.5,PB.7083.10	PB.7083.5,PB.7083.7,PB.7083.10
Scaffold_122	Ppup077110	Ppup077110;A5:Scaffold_122:321034-321118:320815-321118:+	PB.7083.8	PB.7083.2,PB.7083.5,PB.7083.6,PB.7083.3,PB.7083.7,PB.7083.1,PB.7083.4,PB.7083.8
Scaffold_122	Ppup077250	Ppup077250;A5:Scaffold_122:579067-579405:578956-579405:+	PB.7090.2	PB.7090.2,PB.7090.7,PB.7090.6
Scaffold_122	Ppup077250	Ppup077250;A5:Scaffold_122:577340-577763:577250-577763:+	PB.7090.7	PB.7090.2,PB.7090.1,PB.7090.7,PB.7090.6
Scaffold_122	Ppup077520	Ppup077520;A5:Scaffold_122:761009-761663:760955-761663:+	PB.7112.11,PB.7112.12,PB.7112.10	PB.7112.9,PB.7112.10,PB.7112.11,PB.7112.12
Scaffold_122	Ppup077520	Ppup077520;A5:Scaffold_122:761367-761663:761009-761663:+	PB.7112.13	PB.7112.13,PB.7112.10,PB.7112.11,PB.7112.12
Scaffold_122	Ppup077520	Ppup077520;A5:Scaffold_122:761367-761663:760955-761663:+	PB.7112.13	PB.7112.13,PB.7112.9
Scaffold_122	Ppup077090_Ppup077100	Ppup077090_Ppup077100;A5:Scaffold_122:318045-318755:318045-318994:-	PB.7082.6	PB.7082.6,PB.7082.1
Scaffold_122	Ppup077090_Ppup077100	Ppup077090_Ppup077100;A5:Scaffold_122:318045-318755:318045-318780:-	PB.7082.6	PB.7082.6,PB.7082.7
Scaffold_122	Ppup077090_Ppup077100	Ppup077090_Ppup077100;A5:Scaffold_122:318045-318780:318045-318994:-	PB.7082.7	PB.7082.7,PB.7082.1
Scaffold_122	Ppup077310	Ppup077310;A5:Scaffold_122:610724-610962:610724-611727:-	PB.7095.1	PB.7095.6,PB.7095.1
Scaffold_122	Ppup077510	Ppup077510;A5:Scaffold_122:758427-758744:758427-758905:-	PB.7111.5	PB.7111.12,PB.7111.21,PB.7111.19,PB.7111.4,PB.7111.7,PB.7111.24,PB.7111.18,PB.7111.8,PB.7111.5,PB.7111.16
Scaffold_13	Ppup062600	Ppup062600;A5:Scaffold_13:768799-772593:768799-772894:-	PB.3726.2	PB.3726.25,PB.3726.18,PB.3726.2
Scaffold_13	Ppup063070_Ppup063080	Ppup063070_Ppup063080;A5:Scaffold_13:1800031-1802404:1800031-1802413:-	PB.3738.6,PB.3738.4,PB.3738.9	PB.3738.9,PB.3738.6,PB.3738.5,PB.3738.13,PB.3738.12,PB.3738.4
Scaffold_13	Ppup063140	Ppup063140;A5:Scaffold_13:2129399-2141186:2129399-2141389:-	PB.3744.2	PB.3744.2,PB.3744.4
Scaffold_13	Ppup063190	Ppup063190;A5:Scaffold_13:2173227-2173470:2173227-2173813:-	PB.3749.1	PB.3749.2,PB.3749.1,PB.3749.4
Scaffold_13	Ppup063190	Ppup063190;A5:Scaffold_13:2173227-2173470:2173227-2173826:-	PB.3749.1	PB.3749.1,PB.3749.3
Scaffold_13	Ppup063190	Ppup063190;A5:Scaffold_13:2173227-2173813:2173227-2173826:-	PB.3749.2,PB.3749.4	PB.3749.2,PB.3749.3,PB.3749.4
Scaffold_13	Ppup063290	Ppup063290;A5:Scaffold_13:2257747-2257888:2257747-2258012:-	MSTRG.2163.6	MSTRG.2163.7,MSTRG.2163.6,MSTRG.2163.8
Scaffold_13	Ppup063370	Ppup063370;A5:Scaffold_13:2366770-2366933:2366770-2366942:-	PB.3763.1,PB.3763.5,PB.3763.14,PB.3763.15,PB.3763.17,PB.3763.18	PB.3763.4,PB.3763.3,PB.3763.18,PB.3763.16,PB.3763.15,PB.3763.11,PB.3763.1,PB.3763.17,PB.3763.5,PB.3763.14,PB.3763.10,PB.3763.7
Scaffold_13	Ppup063370	Ppup063370;A5:Scaffold_13:2367032-2369500:2367032-2369698:-	PB.3763.14	PB.3763.13,PB.3763.4,PB.3763.3,PB.3763.11,PB.3763.1,PB.3763.17,PB.3763.5,PB.3763.14
Scaffold_13	Ppup063810	Ppup063810;A5:Scaffold_13:2675757-2675850:2675757-2676078:-	MSTRG.2208.2	MSTRG.2208.2,MSTRG.2208.1
Scaffold_13	Ppup063970	Ppup063970;A5:Scaffold_13:2791534-2791599:2791534-2791611:-	PB.3806.3	PB.3806.3,PB.3806.2
Scaffold_13	Ppup064410	Ppup064410;A5:Scaffold_13:3452170-3452699:3452170-3452785:-	PB.3825.2	PB.3825.2,PB.3825.1
Scaffold_13	Ppup064420	Ppup064420;A5:Scaffold_13:3456185-3456704:3456185-3456727:-	PB.3826.1,PB.3826.2,PB.3826.7	PB.3826.7,PB.3826.1,PB.3826.2,PB.3826.8,PB.3826.3
Scaffold_13	Ppup064420	Ppup064420;A5:Scaffold_13:3456185-3456625:3456185-3456704:-	PB.3826.5,PB.3826.6	PB.3826.7,PB.3826.5,PB.3826.1,PB.3826.6,PB.3826.2
Scaffold_13	Ppup064420	Ppup064420;A5:Scaffold_13:3456185-3456625:3456185-3456727:-	PB.3826.5,PB.3826.6	PB.3826.6,PB.3826.8,PB.3826.5,PB.3826.3
Scaffold_13	Ppup064550	Ppup064550;A5:Scaffold_13:3533390-3533500:3533390-3533509:-	PB.3830.1,PB.3830.14,PB.3830.4,PB.3830.5,PB.3830.6,PB.3830.9,PB.3830.18	PB.3830.6,PB.3830.4,PB.3830.5,PB.3830.1,PB.3830.9,PB.3830.18,PB.3830.13,PB.3830.14
Scaffold_13	Ppup064680	Ppup064680;A5:Scaffold_13:3869972-3870457:3869972-3873084:-	PB.3842.4	PB.3842.4,PB.3842.18
Scaffold_13	Ppup062320	Ppup062320;A5:Scaffold_13:300968-301286:300905-301286:+	PB.3709.10,PB.3709.5	PB.3709.3,PB.3709.5,PB.3709.1,PB.3709.10
Scaffold_13	Ppup062620	Ppup062620;A5:Scaffold_13:821601-821808:821584-821808:+	PB.3728.5	PB.3728.1,PB.3728.2,PB.3728.5
Scaffold_13	Ppup062660	Ppup062660;A5:Scaffold_13:876497-876760:876491-876760:+	PB.3731.2,PB.3731.6,PB.3731.4	PB.3731.4,PB.3731.8,PB.3731.9,PB.3731.6,PB.3731.2
Scaffold_13	Ppup063240_Ppup063230	Ppup063240_Ppup063230;A5:Scaffold_13:2111372-2112897:2111107-2112897:+	MSTRGVenom.1655.2	MSTRGVenom.1655.1,MSTRGVenom.1655.2
Scaffold_13	Ppup063260	Ppup063260;A5:Scaffold_13:2243134-2244078:2243113-2244078:+	PB.3755.7	PB.3755.7,PB.3755.3,PB.3755.2,PB.3755.1,PB.3755.4
Scaffold_13	Ppup064250	Ppup064250;A5:Scaffold_13:3253362-3253444:3253358-3253444:+	PB.3817.1	PB.3817.2,PB.3817.1
Scaffold_13	Ppup064320	Ppup064320;A5:Scaffold_13:3332975-3337791:3332803-3337791:+	PB.3821.6,PB.3821.3	PB.3821.6,PB.3821.4,PB.3821.3,PB.3821.10
Scaffold_13	Ppup064330_Ppup064320	Ppup064330_Ppup064320;A5:Scaffold_13:3332975-3337791:3332803-3337791:+	PB.3821.8	PB.3821.5,PB.3821.8
Scaffold_13	Ppup064880	Ppup064880;A5:Scaffold_13:4101637-4102369:4101625-4102369:+	PB.3853.11,PB.3853.1,PB.3853.2,PB.3853.6,PB.3853.9,PB.3853.4,PB.3853.8	PB.3853.2,PB.3853.4,PB.3853.10,PB.3853.6,PB.3853.9,PB.3853.1,PB.3853.5,PB.3853.3,PB.3853.8,PB.3853.11,PB.3853.7
Scaffold_131	Ppup098490	Ppup098490;A5:Scaffold_131:38921-39007:38921-39232:-	PB.7137.4	PB.7137.3,PB.7137.4
Scaffold_131	Ppup098490	Ppup098490;A5:Scaffold_131:38921-39232:38921-39421:-	PB.7137.3	PB.7137.3,PB.7137.1
Scaffold_142	Ppup000720_Ppup000820	Ppup000720_Ppup000820;A5:Scaffold_142:354324-354380:354324-354392:-	MSTRG.2360.2,MSTRG.2360.3	MSTRG.2360.2,MSTRG.2360.1,MSTRG.2360.3
Scaffold_142	Ppup000820	Ppup000820;A5:Scaffold_142:354324-354392:354324-354503:-	MSTRG.2360.4	MSTRG.2360.4,MSTRG.2360.5
Scaffold_143	Ppup015780	Ppup015780;A5:Scaffold_143:472294-472600:472173-472600:+	PB.7165.2	PB.7165.2,PB.7165.1
Scaffold_143	Ppup015780	Ppup015780;A5:Scaffold_143:472528-472600:472294-472600:+	PB.7165.3	PB.7165.3,PB.7165.2
Scaffold_147337	Ppup015890	Ppup015890;A5:Scaffold_147337:34820-47658:34812-47658:+	PB.8593.3	PB.8593.2,PB.8593.3
Scaffold_147337	Ppup015890	Ppup015890;A5:Scaffold_147337:34833-47658:34820-47658:+	PB.8593.1	PB.8593.1,PB.8593.3
Scaffold_147337	Ppup015890	Ppup015890;A5:Scaffold_147337:34833-47658:34812-47658:+	PB.8593.1	PB.8593.2,PB.8593.1
Scaffold_147337	Ppup015890	Ppup015890;A5:Scaffold_147337:47588-47658:46956-47658:+	PB.8593.14	PB.8593.14,PB.8593.7
Scaffold_148	Ppup016130	Ppup016130;A5:Scaffold_148:340870-340935:340870-341257:-	PB.7177.41	PB.7177.41,PB.7177.43
Scaffold_150	Ppup130130	Ppup130130;A5:Scaffold_150:230498-231319:230224-231319:+	MSTRG.2436.2	MSTRG.2436.1,MSTRG.2436.2
Scaffold_150	Ppup130130	Ppup130130;A5:Scaffold_150:230664-231319:230224-231319:+	MSTRG.2436.3	MSTRG.2436.1,MSTRG.2436.3
Scaffold_150	Ppup130130	Ppup130130;A5:Scaffold_150:230664-231319:230498-231319:+	MSTRG.2436.3	MSTRG.2436.3,MSTRG.2436.2
Scaffold_150	Ppup130130	Ppup130130;A5:Scaffold_150:230690-231319:230224-231319:+	MSTRG.2436.4	MSTRG.2436.4,MSTRG.2436.1
Scaffold_150	Ppup130130	Ppup130130;A5:Scaffold_150:230690-231319:230498-231319:+	MSTRG.2436.4	MSTRG.2436.4,MSTRG.2436.2
Scaffold_150	Ppup130130	Ppup130130;A5:Scaffold_150:230690-231319:230664-231319:+	MSTRG.2436.4	MSTRG.2436.4,MSTRG.2436.3
Scaffold_150	Ppup130130	Ppup130130;A5:Scaffold_150:230733-231319:230224-231319:+	MSTRG.2436.5	MSTRG.2436.1,MSTRG.2436.5
Scaffold_150	Ppup130130	Ppup130130;A5:Scaffold_150:230733-231319:230498-231319:+	MSTRG.2436.5	MSTRG.2436.5,MSTRG.2436.2
Scaffold_150	Ppup130130	Ppup130130;A5:Scaffold_150:230733-231319:230664-231319:+	MSTRG.2436.5	MSTRG.2436.3,MSTRG.2436.5
Scaffold_150	Ppup130130	Ppup130130;A5:Scaffold_150:230733-231319:230690-231319:+	MSTRG.2436.5	MSTRG.2436.4,MSTRG.2436.5
Scaffold_150	Ppup130170	Ppup130170;A5:Scaffold_150:287406-288061:287143-288061:+	PB.7190.9	PB.7190.7,PB.7190.8,PB.7190.9
Scaffold_150	Ppup130170	Ppup130170;A5:Scaffold_150:295576-295683:295559-295683:+	PB.7190.16,PB.7190.19	PB.7190.16,PB.7190.19,PB.7190.17
Scaffold_150	Ppup130280	Ppup130280;A5:Scaffold_150:385506-385597:385481-385597:+	PB.7196.2	PB.7196.1,PB.7196.2
Scaffold_150	Ppup130520_Ppup130510	Ppup130520_Ppup130510;A5:Scaffold_150:835456-837069:835444-837069:+	PB.7208.2,PB.7208.3,PB.7208.6	PB.7208.3,PB.7208.6,PB.7208.4,PB.7208.2
Scaffold_150	Ppup130520_Ppup130510	Ppup130520_Ppup130510;A5:Scaffold_150:838499-841111:838495-841111:+	PB.7208.2,PB.7208.3,PB.7208.4,PB.7208.6	PB.7208.4,PB.7208.1,PB.7208.6,PB.7208.3,PB.7208.2
Scaffold_150	Ppup130520_Ppup130510	Ppup130520_Ppup130510;A5:Scaffold_150:722502-723498:722477-723498:+	PB.7208.3	PB.7208.3,PB.7208.4,PB.7208.1,PB.7208.2
Scaffold_150	Ppup130520	Ppup130520;A5:Scaffold_150:833981-834878:833972-834878:+	PB.7208.10,PB.7208.7,PB.7208.8,PB.7208.9,PB.7208.13,PB.7208.11,PB.7208.12,PB.7208.14,PB.7208.17,PB.7208.18,PB.7208.19,PB.7208.20,PB.7208.21,PB.7208.23,PB.7208.25	PB.7208.22,PB.7208.14,PB.7208.10,PB.7208.19,PB.7208.8,PB.7208.9,PB.7208.20,PB.7208.21,PB.7208.23,PB.7208.18,PB.7208.13,PB.7208.12,PB.7208.7,PB.7208.11,PB.7208.25,PB.7208.17
Scaffold_150	Ppup130520	Ppup130520;A5:Scaffold_150:835456-837069:835444-837069:+	PB.7208.10,PB.7208.9,PB.7208.11,PB.7208.18,PB.7208.20,PB.7208.23,PB.7208.25	PB.7208.14,PB.7208.10,PB.7208.20,PB.7208.9,PB.7208.23,PB.7208.18,PB.7208.11,PB.7208.25
Scaffold_150	Ppup130520	Ppup130520;A5:Scaffold_150:829572-829650:829547-829650:+	PB.7208.20	PB.7208.18,PB.7208.20,PB.7208.19,PB.7208.17
Scaffold_150	Ppup130150	Ppup130150;A5:Scaffold_150:274904-275840:274904-275882:-	PB.7188.4	PB.7188.4,PB.7188.1
Scaffold_153	Ppup030870	Ppup030870;A5:Scaffold_153:14817-15564:14816-15564:+	PB.7219.2	PB.7219.6,PB.7219.2
Scaffold_153	Ppup031100	Ppup031100;A5:Scaffold_153:354038-354357:353802-354357:+	PB.7238.12,PB.7238.13,PB.7238.14,PB.7238.9,PB.7238.11,PB.7238.15	PB.7238.9,PB.7238.14,PB.7238.12,PB.7238.13,PB.7238.10,PB.7238.15,PB.7238.11
Scaffold_153	Ppup031130	Ppup031130;A5:Scaffold_153:387627-387906:387496-387906:+	PB.7242.2	PB.7242.2,PB.7242.3
Scaffold_153	Ppup031560	Ppup031560;A5:Scaffold_153:562740-562855:562707-562855:+	PB.7257.8,PB.7257.5,PB.7257.7	PB.7257.8,PB.7257.3,PB.7257.7,PB.7257.6,PB.7257.5,PB.7257.9
Scaffold_153	Ppup031560	Ppup031560;A5:Scaffold_153:562914-563015:562707-563015:+	PB.7257.2	PB.7257.2,PB.7257.4
Scaffold_153	Ppup031580	Ppup031580;A5:Scaffold_153:566082-566796:565992-566796:+	PB.7258.7,PB.7258.4	PB.7258.3,PB.7258.8,PB.7258.4,PB.7258.1,PB.7258.7
Scaffold_153	Ppup031580	Ppup031580;A5:Scaffold_153:566082-567313:565992-567313:+	PB.7258.6	PB.7258.9,PB.7258.5,PB.7258.2,PB.7258.6
Scaffold_153	Ppup031660	Ppup031660;A5:Scaffold_153:716966-717181:716906-717181:+	PB.7265.6,PB.7265.5	PB.7265.2,PB.7265.6,PB.7265.1,PB.7265.5,PB.7265.3
Scaffold_153	Ppup031700	Ppup031700;A5:Scaffold_153:742158-743413:741772-743413:+	PB.7267.5	PB.7267.7,PB.7267.5
Scaffold_153	Ppup031750	Ppup031750;A5:Scaffold_153:842768-846280:841975-846280:+	PB.7270.2	PB.7270.6,PB.7270.2
Scaffold_153	Ppup031020	Ppup031020;A5:Scaffold_153:310453-310917:310453-311076:-	PB.7235.14,PB.7235.10,PB.7235.11,PB.7235.31,PB.7235.9,PB.7235.7	PB.7235.11,PB.7235.25,PB.7235.9,PB.7235.13,PB.7235.12,PB.7235.31,PB.7235.7,PB.7235.5,PB.7235.15,PB.7235.14,PB.7235.27,PB.7235.10
Scaffold_153	Ppup031510	Ppup031510;A5:Scaffold_153:529425-529524:529425-529560:-	PB.7252.1	PB.7252.7,PB.7252.2,PB.7252.1
Scaffold_153	Ppup031540	Ppup031540;A5:Scaffold_153:552386-553638:552386-554382:-	PB.7255.2,PB.7255.1,PB.7255.9,PB.7255.18,PB.7255.28,PB.7255.25	PB.7255.13,PB.7255.26,PB.7255.1,PB.7255.5,PB.7255.9,PB.7255.2,PB.7255.18,PB.7255.25,PB.7255.7,PB.7255.28
Scaffold_153	Ppup031540	Ppup031540;A5:Scaffold_153:552386-553638:552386-554238:-	PB.7255.2,PB.7255.1,PB.7255.9,PB.7255.18,PB.7255.28,PB.7255.25	PB.7255.1,PB.7255.6,PB.7255.9,PB.7255.2,PB.7255.27,PB.7255.12,PB.7255.18,PB.7255.25,PB.7255.28
Scaffold_153	Ppup031540	Ppup031540;A5:Scaffold_153:552386-554238:552386-554382:-	PB.7255.6,PB.7255.12,PB.7255.27	PB.7255.13,PB.7255.26,PB.7255.5,PB.7255.6,PB.7255.27,PB.7255.12,PB.7255.7
Scaffold_153	Ppup031800	Ppup031800;A5:Scaffold_153:877957-878152:877957-878297:-	PB.7273.3	PB.7273.6,PB.7273.3
Scaffold_154	Ppup155920_Ppup155990	Ppup155920_Ppup155990;A5:Scaffold_154:243383-280078:243383-280117:-	MSTRG.2542.1	MSTRG.2542.2,MSTRG.2542.1
Scaffold_157	Ppup150360_Ppup150370	Ppup150360_Ppup150370;A5:Scaffold_157:139023-203359:138804-203359:+	MSTRG.2565.1	MSTRG.2565.2,MSTRG.2565.1
Scaffold_157	Ppup150360_Ppup150370	Ppup150360_Ppup150370;A5:Scaffold_157:139023-203359:138706-203359:+	MSTRG.2565.1	MSTRG.2565.4,MSTRG.2565.1
Scaffold_157	Ppup150360_Ppup150370	Ppup150360_Ppup150370;A5:Scaffold_157:138804-203359:138706-203359:+	MSTRG.2565.2	MSTRG.2565.2,MSTRG.2565.4
Scaffold_157	Ppup150360_Ppup150370	Ppup150360_Ppup150370;A5:Scaffold_157:139027-203359:139023-203359:+	MSTRG.2565.3	MSTRG.2565.3,MSTRG.2565.1
Scaffold_157	Ppup150360_Ppup150370	Ppup150360_Ppup150370;A5:Scaffold_157:139027-203359:138804-203359:+	MSTRG.2565.3	MSTRG.2565.2,MSTRG.2565.3
Scaffold_157	Ppup150360_Ppup150370	Ppup150360_Ppup150370;A5:Scaffold_157:139027-203359:138706-203359:+	MSTRG.2565.3	MSTRG.2565.3,MSTRG.2565.4
Scaffold_158	Ppup107340	Ppup107340;A5:Scaffold_158:429388-429495:429226-429495:+	MSTRG.2580.3	MSTRG.2580.2,MSTRG.2580.3
Scaffold_158	Ppup107340	Ppup107340;A5:Scaffold_158:429425-429495:429226-429495:+	MSTRG.2580.4	MSTRG.2580.2,MSTRG.2580.4
Scaffold_158	Ppup107340	Ppup107340;A5:Scaffold_158:429425-429495:429388-429495:+	MSTRG.2580.4	MSTRG.2580.3,MSTRG.2580.4
Scaffold_158	Ppup107280	Ppup107280;A5:Scaffold_158:301049-301640:301049-301801:-	PB.7283.4	PB.7283.6,PB.7283.4
Scaffold_159	Ppup107790	Ppup107790;A5:Scaffold_159:157941-158241:157941-158376:-	PB.7299.1,PB.7299.5,PB.7299.3,PB.7299.4	PB.7299.5,PB.7299.8,PB.7299.4,PB.7299.1,PB.7299.3
Scaffold_159	Ppup107820	Ppup107820;A5:Scaffold_159:195739-197191:195739-197224:-	PB.7302.5,PB.7302.2,PB.7302.3,PB.7302.4,PB.7302.8	PB.7302.3,PB.7302.4,PB.7302.7,PB.7302.6,PB.7302.2,PB.7302.8,PB.7302.5
Scaffold_159	Ppup108020	Ppup108020;A5:Scaffold_159:667755-667982:667515-667982:+	PB.7319.5	PB.7319.2,PB.7319.4,PB.7319.5,PB.7319.3
Scaffold_16	Ppup119370	Ppup119370;A5:Scaffold_16:400432-400631:400222-400631:+	PB.3871.10	PB.3871.8,PB.3871.1,PB.3871.10,PB.3871.3,PB.3871.5,PB.3871.2
Scaffold_16	Ppup119400	Ppup119400;A5:Scaffold_16:415212-415620:413761-415620:+	PB.3872.40,PB.3872.42,PB.3872.37	PB.3872.26,PB.3872.15,PB.3872.22,PB.3872.14,PB.3872.37,PB.3872.19,PB.3872.29,PB.3872.42,PB.3872.16,PB.3872.5,PB.3872.13,PB.3872.11,PB.3872.4,PB.3872.8,PB.3872.2,PB.3872.20,PB.3872.35,PB.3872.36,PB.3872.23,PB.3872.7,PB.3872.18,PB.3872.10,PB.3872.40,PB.3872.31,PB.3872.25,PB.3872.21,PB.3872.32,PB.3872.24,PB.3872.17,PB.3872.9,PB.3872.1,PB.3872.34
Scaffold_16	Ppup119400	Ppup119400;A5:Scaffold_16:415212-415620:414700-415620:+	PB.3872.40,PB.3872.42,PB.3872.37	PB.3872.43,PB.3872.42,PB.3872.40,PB.3872.37
Scaffold_16	Ppup119400	Ppup119400;A5:Scaffold_16:414700-415620:413761-415620:+	PB.3872.43	PB.3872.26,PB.3872.15,PB.3872.22,PB.3872.14,PB.3872.19,PB.3872.29,PB.3872.16,PB.3872.5,PB.3872.43,PB.3872.13,PB.3872.11,PB.3872.4,PB.3872.8,PB.3872.2,PB.3872.20,PB.3872.35,PB.3872.36,PB.3872.23,PB.3872.7,PB.3872.18,PB.3872.10,PB.3872.31,PB.3872.25,PB.3872.21,PB.3872.32,PB.3872.24,PB.3872.17,PB.3872.9,PB.3872.1,PB.3872.34
Scaffold_16	Ppup119510	Ppup119510;A5:Scaffold_16:660492-660891:659989-660891:+	PB.3878.2,PB.3878.3	PB.3878.2,PB.3878.7,PB.3878.5,PB.3878.15,PB.3878.3
Scaffold_16	Ppup119530	Ppup119530;A5:Scaffold_16:680454-681630:680450-681630:+	PB.3880.5	PB.3880.7,PB.3880.5
Scaffold_16	Ppup119530	Ppup119530;A5:Scaffold_16:680480-681630:680450-681630:+	PB.3880.1,PB.3880.8	PB.3880.8,PB.3880.7,PB.3880.1
Scaffold_16	Ppup119530	Ppup119530;A5:Scaffold_16:680480-681630:680454-681630:+	PB.3880.1,PB.3880.8	PB.3880.8,PB.3880.5,PB.3880.1
Scaffold_16	Ppup119550	Ppup119550;A5:Scaffold_16:714491-714563:714480-714563:+	PB.3883.1,PB.3883.3	PB.3883.5,PB.3883.3,PB.3883.1,PB.3883.2
Scaffold_16	Ppup120140	Ppup120140;A5:Scaffold_16:2038240-2038445:2037240-2038445:+	PB.3919.1,PB.3919.7	PB.3919.1,PB.3919.3,PB.3919.7,PB.3919.6,PB.3919.4
Scaffold_16	Ppup120140	Ppup120140;A5:Scaffold_16:2038240-2038445:2037448-2038445:+	PB.3919.1,PB.3919.7	PB.3919.1,PB.3919.8,PB.3919.9,PB.3919.7
Scaffold_16	Ppup120140	Ppup120140;A5:Scaffold_16:2041071-2042576:2040993-2042576:+	PB.3919.3,PB.3919.8,PB.3919.10	PB.3919.1,PB.3919.10,PB.3919.9,PB.3919.8,PB.3919.3,PB.3919.6
Scaffold_16	Ppup120140	Ppup120140;A5:Scaffold_16:2037448-2038445:2037240-2038445:+	PB.3919.8	PB.3919.6,PB.3919.8,PB.3919.4,PB.3919.3
Scaffold_16	Ppup120610	Ppup120610;A5:Scaffold_16:2684692-2695081:2684407-2695081:+	PB.3956.2	PB.3956.1,PB.3956.2
Scaffold_16	Ppup120610	Ppup120610;A5:Scaffold_16:2693409-2695081:2684856-2695081:+	PB.3956.3	PB.3956.4,PB.3956.3
Scaffold_16	Ppup119680_Ppup119700	Ppup119680_Ppup119700;A5:Scaffold_16:1286323-1293498:1286323-1293499:-	PB.3892.1	PB.3892.2,PB.3892.1,PB.3892.3
Scaffold_16	Ppup120070_Ppup120060	Ppup120070_Ppup120060;A5:Scaffold_16:1820748-1820827:1820748-1820952:-	PB.3914.2,PB.3914.5	PB.3914.8,PB.3914.2,PB.3914.5
Scaffold_16	Ppup120280	Ppup120280;A5:Scaffold_16:2100755-2101804:2100755-2102001:-	PB.3931.1	PB.3931.1,PB.3931.2
Scaffold_16	Ppup120560	Ppup120560;A5:Scaffold_16:2659434-2659526:2659434-2659559:-	PB.3951.2,PB.3951.4	PB.3951.2,PB.3951.5,PB.3951.6,PB.3951.4
Scaffold_160	Ppup147380	Ppup147380;A5:Scaffold_160:247211-287551:247211-287697:-	MSTRG.2760.2	MSTRG.2760.1,MSTRG.2760.2
Scaffold_164	novelGeneMSTRG.2779	novelGeneMSTRG.2779;A5:Scaffold_164:167051-278346:166823-278346:+	MSTRG.2779.2	MSTRG.2779.2,MSTRG.2779.1
Scaffold_165	Ppup160820_Ppup160810	Ppup160820_Ppup160810;A5:Scaffold_165:992431-992900:992431-992911:-	PB.7369.2	PB.7369.1,PB.7369.2
Scaffold_165	Ppup161000	Ppup161000;A5:Scaffold_165:1401492-1401819:1401492-1401837:-	PB.7377.2,PB.7377.3,PB.7377.6,PB.7377.8	PB.7377.8,PB.7377.6,PB.7377.4,PB.7377.3,PB.7377.2
Scaffold_165	Ppup161000	Ppup161000;A5:Scaffold_165:1404001-1404078:1404001-1404081:-	PB.7377.2,PB.7377.3,PB.7377.4,PB.7377.7	PB.7377.7,PB.7377.8,PB.7377.6,PB.7377.4,PB.7377.3,PB.7377.2
Scaffold_165	Ppup161000	Ppup161000;A5:Scaffold_165:1405214-1405328:1405214-1405465:-	PB.7377.2,PB.7377.4,PB.7377.8	PB.7377.8,PB.7377.6,PB.7377.4,PB.7377.3,PB.7377.2
Scaffold_165	Ppup161120	Ppup161120;A5:Scaffold_165:1626861-1627026:1626861-1627351:-	PB.7387.8,PB.7387.10	PB.7387.11,PB.7387.2,PB.7387.10,PB.7387.5,PB.7387.8,PB.7387.3,PB.7387.4,PB.7387.6,PB.7387.1
Scaffold_165	Ppup161150	Ppup161150;A5:Scaffold_165:1776123-1776413:1776123-1776438:-	PB.7388.4	PB.7388.1,PB.7388.6,PB.7388.9,PB.7388.2,PB.7388.4,PB.7388.3
Scaffold_165	Ppup160350	Ppup160350;A5:Scaffold_165:454031-454763:453937-454763:+	PB.7341.6	PB.7341.1,PB.7341.6,PB.7341.4
Scaffold_165	Ppup160350	Ppup160350;A5:Scaffold_165:454400-454763:454308-454763:+	PB.7341.8	PB.7341.7,PB.7341.8
Scaffold_165	Ppup160840	Ppup160840;A5:Scaffold_165:1194913-1197442:1194444-1197442:+	MSTRG.2829.2	MSTRG.2829.1,MSTRG.2829.2
Scaffold_165	Ppup160910	Ppup160910;A5:Scaffold_165:1272794-1272863:1272788-1272863:+	PB.7373.1,PB.7373.10	PB.7373.8,PB.7373.10,PB.7373.1,PB.7373.4
Scaffold_165	Ppup160950	Ppup160950;A5:Scaffold_165:1385153-1385603:1385060-1385603:+	PB.7374.1	PB.7374.1,PB.7374.2
Scaffold_165	Ppup160950	Ppup160950;A5:Scaffold_165:1385153-1385603:1385130-1385603:+	PB.7374.1	PB.7374.1,PB.7374.3
Scaffold_165	Ppup160950	Ppup160950;A5:Scaffold_165:1385130-1385603:1385060-1385603:+	PB.7374.3	PB.7374.2,PB.7374.3
Scaffold_165	Ppup160950	Ppup160950;A5:Scaffold_165:1385213-1385603:1385153-1385603:+	PB.7374.4	PB.7374.1,PB.7374.4
Scaffold_165	Ppup160950	Ppup160950;A5:Scaffold_165:1385213-1385603:1385060-1385603:+	PB.7374.4	PB.7374.2,PB.7374.4
Scaffold_165	Ppup160950	Ppup160950;A5:Scaffold_165:1385213-1385603:1385130-1385603:+	PB.7374.4	PB.7374.3,PB.7374.4
Scaffold_165	Ppup161050	Ppup161050;A5:Scaffold_165:1427293-1427773:1427083-1427773:+	PB.7382.6	PB.7382.1,PB.7382.6,PB.7382.3
Scaffold_165	Ppup161050	Ppup161050;A5:Scaffold_165:1427455-1427773:1427083-1427773:+	PB.7382.7	PB.7382.7,PB.7382.1,PB.7382.3
Scaffold_165	Ppup161050	Ppup161050;A5:Scaffold_165:1427455-1427773:1427293-1427773:+	PB.7382.7	PB.7382.7,PB.7382.6
Scaffold_165	Ppup161200	Ppup161200;A5:Scaffold_165:1841400-1841461:1841209-1841461:+	MSTRGVenom.2193.2	MSTRGVenom.2193.2,MSTRGVenom.2193.1
[truncated: 11,203 more rows]
