# Supplementary material for: Comprehensive isoform-level analysis reveals the contribution of alternative isoforms to venom evolution and repertoire diversity
Source: HighWire-hosted journal article supplement (doi:10.1101/gr.277707.123), 2023-09-01
Supplement: Supplemental_Tables_S1_to_S19.zip [file Supplemental_Table_S7.xlsx]

## Sheet: Sheet1
Supplemental Table S7. Gene ontology (GO) enrichment analysis revealed that the 3220 AS genes are enriched in multiple biological regulation processes (p < 0.05, false discovery rate adjusted, FDR-adjusted)
GO	NS	enrichment	name	ratio_in_study	ratio_in_pop	p_uncorrected	depth	study_count	p_fdr_bh	study_items
GO:0065007	BP	e	biological regulation	1314/2424	4564/10157	1.03669e-25	1	1314	3.86272e-22	Ppup001710.1, Ppup001720.1, Ppup001800.1, Ppup001810.1, Ppup001870.1, Ppup002240.1, Ppup002250.1, Ppup002450.1, Ppup002780.1, Ppup002790.1, Ppup002870.1, Ppup002890.1, Ppup002900.1, Ppup003070.1, Ppup003100.1, Ppup003170.1, Ppup003230.1, Ppup003620.1, Ppup003740.1, Ppup003910.1, Ppup003930.1, Ppup004080.1, Ppup004140.1, Ppup004150.1, Ppup004180.1, Ppup004410.1, Ppup004420.1, Ppup004450.1, Ppup004…
GO:0050789	BP	e	regulation of biological process	1197/2424	4177/10157	5.04788e-21	2	1197	1.41063e-17	Ppup001710.1, Ppup001720.1, Ppup001800.1, Ppup001810.1, Ppup001870.1, Ppup002240.1, Ppup002250.1, Ppup002450.1, Ppup002780.1, Ppup002790.1, Ppup002870.1, Ppup002890.1, Ppup002900.1, Ppup003070.1, Ppup003100.1, Ppup003170.1, Ppup003230.1, Ppup003620.1, Ppup003740.1, Ppup003910.1, Ppup003930.1, Ppup004080.1, Ppup004150.1, Ppup004180.1, Ppup004410.1, Ppup004450.1, Ppup004550.1, Ppup005260.1, Ppup005…
GO:0050794	BP	e	regulation of cellular process	1121/2424	3893/10157	7.96527e-20	3	1121	1.48393e-16	Ppup001710.1, Ppup001720.1, Ppup001800.1, Ppup001810.1, Ppup001870.1, Ppup002240.1, Ppup002250.1, Ppup002780.1, Ppup002790.1, Ppup002870.1, Ppup002890.1, Ppup002900.1, Ppup003070.1, Ppup003100.1, Ppup003170.1, Ppup003230.1, Ppup003620.1, Ppup003740.1, Ppup003910.1, Ppup004080.1, Ppup004150.1, Ppup004180.1, Ppup004410.1, Ppup004450.1, Ppup004550.1, Ppup005260.1, Ppup005280.1, Ppup005320.1, Ppup005…
GO:0051179	BP	e	localization	645/2424	2048/10157	8.89942e-19	1	645	1.42111e-15	Ppup001870.1, Ppup002230.1, Ppup002250.1, Ppup002280.1, Ppup002480.1, Ppup002870.1, Ppup003030.1, Ppup003040.1, Ppup003070.1, Ppup003170.1, Ppup003230.1, Ppup003780.1, Ppup004080.1, Ppup004150.1, Ppup004180.1, Ppup004330.1, Ppup004410.1, Ppup004420.1, Ppup004540.1, Ppup005260.1, Ppup005470.1, Ppup005830.1, Ppup005970.1, Ppup006040.1, Ppup006390.1, Ppup006410.1, Ppup006440.1, Ppup006490.1, Ppup006…
GO:0051234	BP	e	establishment of localization	566/2424	1804/10157	9.33801e-16	2	566	1.30475e-12	Ppup001870.1, Ppup002230.1, Ppup002250.1, Ppup002280.1, Ppup002480.1, Ppup002870.1, Ppup003030.1, Ppup003040.1, Ppup003070.1, Ppup003230.1, Ppup003780.1, Ppup004080.1, Ppup004180.1, Ppup004330.1, Ppup004410.1, Ppup004420.1, Ppup004540.1, Ppup005260.1, Ppup005470.1, Ppup005830.1, Ppup006040.1, Ppup006390.1, Ppup006410.1, Ppup006440.1, Ppup006490.1, Ppup006500.1, Ppup006550.1, Ppup006730.1, Ppup006…
GO:0006810	BP	e	transport	550/2424	1745/10157	1.07197e-15	3	550	1.33139e-12	Ppup001870.1, Ppup002230.1, Ppup002250.1, Ppup002280.1, Ppup002480.1, Ppup002870.1, Ppup003030.1, Ppup003040.1, Ppup003070.1, Ppup003230.1, Ppup003780.1, Ppup004080.1, Ppup004180.1, Ppup004330.1, Ppup004410.1, Ppup004420.1, Ppup004540.1, Ppup005260.1, Ppup005470.1, Ppup005830.1, Ppup006040.1, Ppup006390.1, Ppup006410.1, Ppup006440.1, Ppup006490.1, Ppup006500.1, Ppup006550.1, Ppup006730.1, Ppup006…
GO:0048518	BP	e	positive regulation of biological process	628/2424	2068/10157	2.56328e-14	3	628	2.83236e-11	Ppup001710.1, Ppup001800.1, Ppup001870.1, Ppup002780.1, Ppup002890.1, Ppup003070.1, Ppup003170.1, Ppup003230.1, Ppup003620.1, Ppup003910.1, Ppup004150.1, Ppup004410.1, Ppup004550.1, Ppup005280.1, Ppup005320.1, Ppup005470.1, Ppup005490.1, Ppup005940.1, Ppup005970.1, Ppup006190.1, Ppup006210.1, Ppup006390.1, Ppup006440.1, Ppup006490.1, Ppup006500.1, Ppup006720.1, Ppup006810.1, Ppup006950.1, Ppup006…
GO:0019222	BP	e	regulation of metabolic process	721/2424	2426/10157	2.86351e-14	3	721	2.83236e-11	Ppup001710.1, Ppup001800.1, Ppup001810.1, Ppup001870.1, Ppup002450.1, Ppup002890.1, Ppup003100.1, Ppup003230.1, Ppup003620.1, Ppup003740.1, Ppup003910.1, Ppup003930.1, Ppup004410.1, Ppup004550.1, Ppup005280.1, Ppup005320.1, Ppup005470.1, Ppup005940.1, Ppup006210.1, Ppup006360.1, Ppup006490.1, Ppup006660.1, Ppup006720.1, Ppup007300.1, Ppup007710.1, Ppup007830.1, Ppup008020.1, Ppup008030.1, Ppup008…
GO:0048522	BP	e	positive regulation of cellular process	589/2424	1921/10157	3.04065e-14	4	589	2.83236e-11	Ppup001710.1, Ppup001800.1, Ppup001870.1, Ppup002780.1, Ppup002890.1, Ppup003070.1, Ppup003170.1, Ppup003230.1, Ppup003620.1, Ppup003910.1, Ppup004150.1, Ppup004410.1, Ppup004550.1, Ppup005280.1, Ppup005320.1, Ppup005490.1, Ppup005940.1, Ppup005970.1, Ppup006210.1, Ppup006390.1, Ppup006440.1, Ppup006490.1, Ppup006500.1, Ppup006720.1, Ppup006810.1, Ppup006950.1, Ppup007260.1, Ppup007300.1, Ppup007…
GO:0031323	BP	e	regulation of cellular metabolic process	656/2424	2182/10157	5.2768e-14	4	656	4.53723e-11	Ppup001710.1, Ppup001800.1, Ppup001810.1, Ppup001870.1, Ppup002890.1, Ppup003100.1, Ppup003620.1, Ppup003740.1, Ppup004410.1, Ppup004550.1, Ppup005280.1, Ppup005320.1, Ppup005470.1, Ppup005940.1, Ppup006210.1, Ppup006360.1, Ppup006490.1, Ppup006660.1, Ppup006720.1, Ppup007300.1, Ppup007710.1, Ppup007830.1, Ppup008020.1, Ppup008030.1, Ppup008570.1, Ppup008760.1, Ppup009680.1, Ppup010070.1, Ppup010…
GO:0080090	BP	e	regulation of primary metabolic process	641/2424	2125/10157	5.77832e-14	4	641	4.61357e-11	Ppup001710.1, Ppup001800.1, Ppup001810.1, Ppup001870.1, Ppup002450.1, Ppup002890.1, Ppup003100.1, Ppup003620.1, Ppup003740.1, Ppup004410.1, Ppup004550.1, Ppup005280.1, Ppup005320.1, Ppup005470.1, Ppup005940.1, Ppup006210.1, Ppup006360.1, Ppup006490.1, Ppup006660.1, Ppup006720.1, Ppup007300.1, Ppup007710.1, Ppup007830.1, Ppup008020.1, Ppup008030.1, Ppup008570.1, Ppup008760.1, Ppup009680.1, Ppup010…
GO:0060255	BP	e	regulation of macromolecule metabolic process	667/2424	2261/10157	2.43987e-12	4	667	1.60429e-09	Ppup001710.1, Ppup001800.1, Ppup001810.1, Ppup001870.1, Ppup002450.1, Ppup002890.1, Ppup003100.1, Ppup003230.1, Ppup003620.1, Ppup003740.1, Ppup003910.1, Ppup003930.1, Ppup004410.1, Ppup004550.1, Ppup005280.1, Ppup005320.1, Ppup005470.1, Ppup006210.1, Ppup006360.1, Ppup006490.1, Ppup006660.1, Ppup006720.1, Ppup007300.1, Ppup007710.1, Ppup007830.1, Ppup008020.1, Ppup008030.1, Ppup008570.1, Ppup008…
GO:0051171	BP	e	regulation of nitrogen compound metabolic process	616/2424	2067/10157	3.59413e-12	4	616	2.11448e-09	Ppup001710.1, Ppup001800.1, Ppup001810.1, Ppup001870.1, Ppup002450.1, Ppup002890.1, Ppup003100.1, Ppup003620.1, Ppup003740.1, Ppup004410.1, Ppup004550.1, Ppup005280.1, Ppup005320.1, Ppup005470.1, Ppup006210.1, Ppup006360.1, Ppup006490.1, Ppup006660.1, Ppup006720.1, Ppup007300.1, Ppup007710.1, Ppup007830.1, Ppup008020.1, Ppup008030.1, Ppup008570.1, Ppup008760.1, Ppup009680.1, Ppup010070.1, Ppup010…
GO:0023051	BP	e	regulation of signaling	340/2424	1038/10157	6.53182e-12	3	340	3.65063e-09	Ppup001710.1, Ppup001800.1, Ppup002780.1, Ppup003170.1, Ppup003230.1, Ppup004150.1, Ppup004410.1, Ppup004450.1, Ppup004550.1, Ppup005260.1, Ppup005280.1, Ppup005320.1, Ppup005470.1, Ppup005490.1, Ppup005940.1, Ppup006490.1, Ppup006500.1, Ppup006810.1, Ppup006990.1, Ppup007130.1, Ppup007690.1, Ppup008700.1, Ppup008760.1, Ppup008830.1, Ppup009190.1, Ppup009230.1, Ppup009730.1, Ppup010070.1, Ppup010…
GO:0048519	BP	e	negative regulation of biological process	528/2424	1740/10157	9.66096e-12	3	528	5.14239e-09	Ppup001710.1, Ppup001720.1, Ppup001800.1, Ppup003100.1, Ppup003170.1, Ppup003620.1, Ppup003740.1, Ppup003910.1, Ppup003930.1, Ppup004080.1, Ppup004410.1, Ppup005320.1, Ppup005470.1, Ppup005490.1, Ppup005940.1, Ppup006360.1, Ppup006490.1, Ppup006550.1, Ppup006660.1, Ppup006720.1, Ppup006810.1, Ppup006990.1, Ppup007690.1, Ppup007710.1, Ppup008700.1, Ppup008760.1, Ppup008830.1, Ppup009190.1, Ppup009…
GO:0010646	BP	e	regulation of cell communication	340/2424	1050/10157	3.2126e-11	4	340	1.56132e-08	Ppup001710.1, Ppup001800.1, Ppup002780.1, Ppup003170.1, Ppup003230.1, Ppup004150.1, Ppup004410.1, Ppup004450.1, Ppup004550.1, Ppup005260.1, Ppup005280.1, Ppup005320.1, Ppup005470.1, Ppup005490.1, Ppup005940.1, Ppup006490.1, Ppup006500.1, Ppup006810.1, Ppup006990.1, Ppup007130.1, Ppup007690.1, Ppup008700.1, Ppup008760.1, Ppup008830.1, Ppup009190.1, Ppup009230.1, Ppup009730.1, Ppup009830.1, Ppup010…
GO:0016043	BP	e	cellular component organization	702/2424	2441/10157	1.45664e-10	3	702	6.51292e-08	Ppup001720.1, Ppup001800.1, Ppup001870.1, Ppup002900.1, Ppup003030.1, Ppup003070.1, Ppup003100.1, Ppup003120.1, Ppup003170.1, Ppup003230.1, Ppup003620.1, Ppup003780.1, Ppup003910.1, Ppup003930.1, Ppup003990.1, Ppup004080.1, Ppup004180.1, Ppup004200.1, Ppup005470.1, Ppup005490.1, Ppup005800.1, Ppup005970.1, Ppup006390.1, Ppup006440.1, Ppup006500.1, Ppup006710.1, Ppup006810.1, Ppup006950.1, Ppup007…
GO:0009966	BP	e	regulation of signal transduction	283/2424	857/10157	2.14214e-10	5	283	8.55172e-08	Ppup001710.1, Ppup001800.1, Ppup003170.1, Ppup004150.1, Ppup004410.1, Ppup004450.1, Ppup004550.1, Ppup005260.1, Ppup005280.1, Ppup005320.1, Ppup005470.1, Ppup005490.1, Ppup005940.1, Ppup006490.1, Ppup006500.1, Ppup006810.1, Ppup006990.1, Ppup007690.1, Ppup008700.1, Ppup008760.1, Ppup009230.1, Ppup009730.1, Ppup010070.1, Ppup010210.1, Ppup010280.1, Ppup010900.1, Ppup011100.1, Ppup012830.1, Ppup013…
GO:0010468	BP	e	regulation of gene expression	503/2424	1677/10157	2.74067e-10	5	503	1.05639e-07	Ppup001710.1, Ppup001800.1, Ppup001810.1, Ppup001870.1, Ppup002890.1, Ppup003100.1, Ppup003230.1, Ppup003620.1, Ppup003740.1, Ppup003910.1, Ppup003930.1, Ppup004410.1, Ppup004550.1, Ppup005280.1, Ppup005470.1, Ppup006210.1, Ppup006360.1, Ppup006660.1, Ppup006720.1, Ppup007300.1, Ppup007710.1, Ppup007830.1, Ppup008020.1, Ppup008030.1, Ppup008570.1, Ppup008690.1, Ppup008760.1, Ppup009680.1, Ppup009…
GO:1902531	BP	e	regulation of intracellular signal transduction	168/2424	459/10157	3.70248e-10	6	168	1.37954e-07	Ppup001800.1, Ppup003170.1, Ppup004410.1, Ppup004550.1, Ppup005280.1, Ppup005320.1, Ppup005470.1, Ppup005490.1, Ppup005940.1, Ppup006490.1, Ppup006500.1, Ppup006810.1, Ppup008700.1, Ppup008760.1, Ppup009230.1, Ppup009730.1, Ppup010070.1, Ppup010210.1, Ppup012830.1, Ppup013130.1, Ppup014250.1, Ppup016190.1, Ppup017930.1, Ppup018870.1, Ppup019150.1, Ppup019460.1, Ppup019990.1, Ppup021150.1, Ppup021…
GO:0006796	BP	e	phosphate-containing compound metabolic process	280/2424	851/10157	4.26433e-10	4	280	1.53763e-07	Ppup001740.1, Ppup001870.1, Ppup002290.1, Ppup003740.1, Ppup004080.1, Ppup004450.1, Ppup004480.1, Ppup005210.1, Ppup005320.1, Ppup005470.1, Ppup005850.1, Ppup006440.1, Ppup008760.1, Ppup008980.1, Ppup009730.1, Ppup009850.1, Ppup009900.1, Ppup010210.1, Ppup011260.1, Ppup011470.1, Ppup011620.1, Ppup014100.1, Ppup014250.1, Ppup015780.1, Ppup016890.1, Ppup017930.1, Ppup018550.1, Ppup018610.1, Ppup018…
GO:0051252	BP	e	regulation of RNA metabolic process	418/2424	1360/10157	4.52068e-10	6	418	1.57913e-07	Ppup001710.1, Ppup001810.1, Ppup001870.1, Ppup002890.1, Ppup003100.1, Ppup003620.1, Ppup004410.1, Ppup004550.1, Ppup005280.1, Ppup005470.1, Ppup006210.1, Ppup006360.1, Ppup006660.1, Ppup007300.1, Ppup007710.1, Ppup007830.1, Ppup008020.1, Ppup008030.1, Ppup008570.1, Ppup008760.1, Ppup009680.1, Ppup010940.1, Ppup011100.1, Ppup011200.1, Ppup011560.1, Ppup011730.1, Ppup013200.1, Ppup013940.1, Ppup014…
GO:0051128	BP	e	regulation of cellular component organization	305/2424	943/10157	5.62791e-10	4	305	1.90633e-07	Ppup001710.1, Ppup001800.1, Ppup003070.1, Ppup003910.1, Ppup004180.1, Ppup004410.1, Ppup005280.1, Ppup005470.1, Ppup005490.1, Ppup005970.1, Ppup006390.1, Ppup006440.1, Ppup006490.1, Ppup006810.1, Ppup006950.1, Ppup008680.1, Ppup009190.1, Ppup010280.1, Ppup011260.1, Ppup011300.1, Ppup011620.1, Ppup013930.1, Ppup016230.1, Ppup017480.1, Ppup017930.1, Ppup018070.1, Ppup018270.1, Ppup018600.1, Ppup018…
GO:0071702	BP	e	organic substance transport	329/2424	1031/10157	6.07718e-10	4	329	1.99208e-07	Ppup002230.1, Ppup002480.1, Ppup003030.1, Ppup003230.1, Ppup003780.1, Ppup004080.1, Ppup004180.1, Ppup004330.1, Ppup004420.1, Ppup004540.1, Ppup005830.1, Ppup006390.1, Ppup006410.1, Ppup006490.1, Ppup006550.1, Ppup006730.1, Ppup006950.1, Ppup007130.1, Ppup007170.1, Ppup008770.1, Ppup009830.1, Ppup010230.1, Ppup010920.1, Ppup011180.1, Ppup011300.1, Ppup011610.1, Ppup012830.1, Ppup013010.1, Ppup013…
GO:0071840	BP	e	cellular component organization or biogenesis	708/2424	2481/10157	6.2375e-10	2	708	1.99208e-07	Ppup001720.1, Ppup001800.1, Ppup001870.1, Ppup002900.1, Ppup003030.1, Ppup003070.1, Ppup003100.1, Ppup003120.1, Ppup003170.1, Ppup003230.1, Ppup003620.1, Ppup003780.1, Ppup003910.1, Ppup003930.1, Ppup003990.1, Ppup004080.1, Ppup004180.1, Ppup004200.1, Ppup005470.1, Ppup005490.1, Ppup005800.1, Ppup005970.1, Ppup006390.1, Ppup006440.1, Ppup006500.1, Ppup006710.1, Ppup006810.1, Ppup006950.1, Ppup007…
GO:0016310	BP	e	phosphorylation	131/2424	338/10157	6.72384e-10	5	131	2.08775e-07	Ppup004450.1, Ppup005320.1, Ppup005470.1, Ppup008760.1, Ppup008980.1, Ppup009730.1, Ppup009900.1, Ppup011260.1, Ppup011620.1, Ppup014100.1, Ppup018550.1, Ppup018610.1, Ppup018760.1, Ppup019650.1, Ppup019930.1, Ppup021150.1, Ppup021180.1, Ppup021190.1, Ppup023070.1, Ppup024220.1, Ppup025490.1, Ppup026440.1, Ppup026550.1, Ppup027810.1, Ppup028810.1, Ppup029910.1, Ppup030870.1, Ppup031100.1, Ppup035…
GO:0016192	BP	e	vesicle-mediated transport	204/2424	586/10157	8.81583e-10	4	204	2.59325e-07	Ppup001870.1, Ppup002280.1, Ppup003030.1, Ppup003070.1, Ppup003230.1, Ppup003780.1, Ppup004080.1, Ppup004180.1, Ppup004330.1, Ppup004410.1, Ppup004540.1, Ppup005830.1, Ppup006040.1, Ppup006390.1, Ppup006440.1, Ppup006490.1, Ppup006550.1, Ppup007260.1, Ppup008830.1, Ppup009830.1, Ppup010280.1, Ppup010330.1, Ppup012590.1, Ppup013930.1, Ppup017870.1, Ppup018240.1, Ppup018840.1, Ppup019690.1, Ppup019…
GO:0048523	BP	e	negative regulation of cellular process	470/2424	1563/10157	9.99583e-10	4	470	2.82786e-07	Ppup001710.1, Ppup001720.1, Ppup001800.1, Ppup003100.1, Ppup003620.1, Ppup003740.1, Ppup003910.1, Ppup004080.1, Ppup004410.1, Ppup005320.1, Ppup005470.1, Ppup005490.1, Ppup005940.1, Ppup006360.1, Ppup006490.1, Ppup006550.1, Ppup006660.1, Ppup006720.1, Ppup006990.1, Ppup007690.1, Ppup007710.1, Ppup008700.1, Ppup008760.1, Ppup008830.1, Ppup009190.1, Ppup009230.1, Ppup009730.1, Ppup009830.1, Ppup010…
GO:0048583	BP	e	regulation of response to stimulus	365/2424	1169/10157	1.01194e-09	3	365	2.82786e-07	Ppup001710.1, Ppup001720.1, Ppup001800.1, Ppup003100.1, Ppup003170.1, Ppup004150.1, Ppup004410.1, Ppup004450.1, Ppup004550.1, Ppup005260.1, Ppup005280.1, Ppup005320.1, Ppup005470.1, Ppup005490.1, Ppup005940.1, Ppup006190.1, Ppup006490.1, Ppup006500.1, Ppup006810.1, Ppup006990.1, Ppup007690.1, Ppup008700.1, Ppup008760.1, Ppup009230.1, Ppup009730.1, Ppup010070.1, Ppup010210.1, Ppup010280.1, Ppup010…
GO:0006793	BP	e	phosphorus metabolic process	281/2424	862/10157	1.19882e-09	3	281	3.2684e-07	Ppup001740.1, Ppup001870.1, Ppup002290.1, Ppup003740.1, Ppup004080.1, Ppup004450.1, Ppup004480.1, Ppup005210.1, Ppup005320.1, Ppup005470.1, Ppup005850.1, Ppup006440.1, Ppup008760.1, Ppup008980.1, Ppup009730.1, Ppup009850.1, Ppup009900.1, Ppup010210.1, Ppup011260.1, Ppup011470.1, Ppup011620.1, Ppup014100.1, Ppup014250.1, Ppup015780.1, Ppup016890.1, Ppup017930.1, Ppup018550.1, Ppup018610.1, Ppup018…
GO:0065008	BP	e	regulation of biological quality	438/2424	1447/10157	1.55298e-09	2	438	4.13315e-07	Ppup001710.1, Ppup001870.1, Ppup002240.1, Ppup002250.1, Ppup002890.1, Ppup003170.1, Ppup003230.1, Ppup003620.1, Ppup004080.1, Ppup004140.1, Ppup004150.1, Ppup004180.1, Ppup004420.1, Ppup004540.1, Ppup005470.1, Ppup005490.1, Ppup005830.1, Ppup005940.1, Ppup006190.1, Ppup006500.1, Ppup006720.1, Ppup006810.1, Ppup006950.1, Ppup007130.1, Ppup007260.1, Ppup007780.1, Ppup008030.1, Ppup008570.1, Ppup008…
GO:0044087	BP	e	regulation of cellular component biogenesis	136/2424	364/10157	4.32882e-09	4	136	1.12529e-06	Ppup003910.1, Ppup004180.1, Ppup005280.1, Ppup005490.1, Ppup005970.1, Ppup006810.1, Ppup008680.1, Ppup009190.1, Ppup010280.1, Ppup017480.1, Ppup017930.1, Ppup018070.1, Ppup018600.1, Ppup018690.1, Ppup021210.1, Ppup021300.1, Ppup021570.1, Ppup022170.1, Ppup023730.1, Ppup024690.1, Ppup027280.1, Ppup027500.1, Ppup027690.1, Ppup028400.1, Ppup029350.1, Ppup029460.1, Ppup031100.1, Ppup031510.1, Ppup036…
GO:0010629	BP	e	negative regulation of gene expression	209/2424	615/10157	5.25608e-09	6	209	1.33528e-06	Ppup003100.1, Ppup003620.1, Ppup003740.1, Ppup003930.1, Ppup005470.1, Ppup006360.1, Ppup006660.1, Ppup008760.1, Ppup011100.1, Ppup011200.1, Ppup011560.1, Ppup013200.1, Ppup014330.1, Ppup017950.1, Ppup018270.1, Ppup018600.1, Ppup018630.1, Ppup018690.1, Ppup018870.1, Ppup018890.1, Ppup019000.1, Ppup019150.1, Ppup019950.1, Ppup020310.1, Ppup021070.1, Ppup021150.1, Ppup022280.1, Ppup023730.1, Ppup024…
GO:0010605	BP	e	negative regulation of macromolecule metabolic process	274/2424	853/10157	1.02057e-08	5	274	2.53508e-06	Ppup001710.1, Ppup003100.1, Ppup003620.1, Ppup003740.1, Ppup003930.1, Ppup005320.1, Ppup005470.1, Ppup006360.1, Ppup006660.1, Ppup006720.1, Ppup008760.1, Ppup010070.1, Ppup010390.1, Ppup011100.1, Ppup011200.1, Ppup011260.1, Ppup011560.1, Ppup012830.1, Ppup013200.1, Ppup014250.1, Ppup014330.1, Ppup015890.1, Ppup017950.1, Ppup018270.1, Ppup018600.1, Ppup018630.1, Ppup018690.1, Ppup018870.1, Ppup018…
GO:0009892	BP	e	negative regulation of metabolic process	294/2424	928/10157	1.39258e-08	4	294	3.38397e-06	Ppup001710.1, Ppup003100.1, Ppup003620.1, Ppup003740.1, Ppup003930.1, Ppup005320.1, Ppup005470.1, Ppup006360.1, Ppup006660.1, Ppup006720.1, Ppup008760.1, Ppup010070.1, Ppup010390.1, Ppup011100.1, Ppup011120.1, Ppup011200.1, Ppup011260.1, Ppup011560.1, Ppup012830.1, Ppup013200.1, Ppup014250.1, Ppup014330.1, Ppup015890.1, Ppup017950.1, Ppup018270.1, Ppup018600.1, Ppup018630.1, Ppup018690.1, Ppup018…
GO:0009893	BP	e	positive regulation of metabolic process	370/2424	1212/10157	1.6006e-08	4	370	3.8067e-06	Ppup001870.1, Ppup003230.1, Ppup003620.1, Ppup004410.1, Ppup004550.1, Ppup005280.1, Ppup005320.1, Ppup005470.1, Ppup005940.1, Ppup006210.1, Ppup006490.1, Ppup006720.1, Ppup007300.1, Ppup007710.1, Ppup008030.1, Ppup008570.1, Ppup008760.1, Ppup009830.1, Ppup011100.1, Ppup011120.1, Ppup013130.1, Ppup013200.1, Ppup014100.1, Ppup015730.1, Ppup015890.1, Ppup016230.1, Ppup016860.1, Ppup017930.1, Ppup017…
GO:0009894	BP	e	regulation of catabolic process	129/2424	347/10157	1.8389e-08	4	129	4.28234e-06	Ppup001710.1, Ppup004410.1, Ppup005320.1, Ppup005470.1, Ppup008760.1, Ppup011120.1, Ppup011260.1, Ppup011300.1, Ppup011730.1, Ppup015890.1, Ppup020080.1, Ppup020310.1, Ppup020690.1, Ppup021300.1, Ppup025880.1, Ppup025910.1, Ppup026550.1, Ppup026630.1, Ppup026790.1, Ppup026960.1, Ppup027120.1, Ppup027280.1, Ppup027520.1, Ppup028280.1, Ppup028400.1, Ppup029350.1, Ppup029460.1, Ppup030870.1, Ppup036…
GO:0019219	BP	e	regulation of nucleobase-containing compound metabolic process	435/2424	1460/10157	1.94001e-08	5	435	4.4256e-06	Ppup001710.1, Ppup001800.1, Ppup001810.1, Ppup001870.1, Ppup002890.1, Ppup003100.1, Ppup003620.1, Ppup004410.1, Ppup004550.1, Ppup005280.1, Ppup005470.1, Ppup006210.1, Ppup006360.1, Ppup006660.1, Ppup007300.1, Ppup007710.1, Ppup007830.1, Ppup008020.1, Ppup008030.1, Ppup008570.1, Ppup008760.1, Ppup009680.1, Ppup010940.1, Ppup011100.1, Ppup011200.1, Ppup011560.1, Ppup011730.1, Ppup013200.1, Ppup013…
GO:0006996	BP	e	organelle organization	350/2424	1140/10157	2.37617e-08	4	350	5.31218e-06	Ppup001720.1, Ppup001800.1, Ppup001870.1, Ppup003070.1, Ppup003170.1, Ppup003780.1, Ppup003910.1, Ppup003990.1, Ppup004080.1, Ppup004180.1, Ppup005470.1, Ppup005490.1, Ppup006390.1, Ppup006500.1, Ppup006710.1, Ppup006950.1, Ppup007260.1, Ppup007460.1, Ppup007560.1, Ppup007690.1, Ppup008690.1, Ppup008980.1, Ppup009830.1, Ppup009920.1, Ppup010280.1, Ppup010900.1, Ppup011180.1, Ppup011270.1, Ppup012…
GO:0006468	BP	e	protein phosphorylation	105/2424	269/10157	2.44758e-08	7	105	5.36452e-06	Ppup005320.1, Ppup005470.1, Ppup008760.1, Ppup008980.1, Ppup009730.1, Ppup011260.1, Ppup014100.1, Ppup018550.1, Ppup018610.1, Ppup018760.1, Ppup019650.1, Ppup019930.1, Ppup021150.1, Ppup021180.1, Ppup021190.1, Ppup023070.1, Ppup025490.1, Ppup026440.1, Ppup027810.1, Ppup028810.1, Ppup029910.1, Ppup030870.1, Ppup031100.1, Ppup035600.1, Ppup035940.1, Ppup036080.1, Ppup037330.1, Ppup037560.1, Ppup044…
GO:0009889	BP	e	regulation of biosynthetic process	445/2424	1502/10157	2.83705e-08	4	445	6.09856e-06	Ppup001710.1, Ppup001870.1, Ppup002890.1, Ppup003100.1, Ppup003620.1, Ppup003740.1, Ppup004410.1, Ppup004550.1, Ppup005280.1, Ppup005320.1, Ppup005470.1, Ppup006210.1, Ppup006360.1, Ppup006660.1, Ppup006720.1, Ppup007300.1, Ppup007710.1, Ppup007830.1, Ppup008020.1, Ppup008030.1, Ppup008570.1, Ppup008760.1, Ppup009680.1, Ppup010940.1, Ppup011100.1, Ppup011120.1, Ppup011200.1, Ppup011560.1, Ppup013…
GO:0051641	BP	e	cellular localization	314/2424	1012/10157	3.97605e-08	2	314	8.38571e-06	Ppup003030.1, Ppup003070.1, Ppup003170.1, Ppup003230.1, Ppup003780.1, Ppup004080.1, Ppup004180.1, Ppup004330.1, Ppup004540.1, Ppup005470.1, Ppup005830.1, Ppup006390.1, Ppup006440.1, Ppup006950.1, Ppup007260.1, Ppup007710.1, Ppup008770.1, Ppup009830.1, Ppup010210.1, Ppup010280.1, Ppup011180.1, Ppup011220.1, Ppup011300.1, Ppup012590.1, Ppup012830.1, Ppup013930.1, Ppup015740.1, Ppup015890.1, Ppup016…
GO:0071705	BP	e	nitrogen compound transport	270/2424	850/10157	4.23511e-08	4	270	8.76668e-06	Ppup003030.1, Ppup003230.1, Ppup003780.1, Ppup004080.1, Ppup004180.1, Ppup004330.1, Ppup004420.1, Ppup004540.1, Ppup005830.1, Ppup006390.1, Ppup006410.1, Ppup006490.1, Ppup006550.1, Ppup006730.1, Ppup006950.1, Ppup007130.1, Ppup007170.1, Ppup008770.1, Ppup009830.1, Ppup010920.1, Ppup011180.1, Ppup011300.1, Ppup012830.1, Ppup013010.1, Ppup013950.1, Ppup015740.1, Ppup016860.1, Ppup017870.1, Ppup018…
GO:0046486	BP	e	glycerolipid metabolic process	62/2424	138/10157	5.06356e-08	5	62	1.02199e-05	Ppup004450.1, Ppup006440.1, Ppup010210.1, Ppup011620.1, Ppup017930.1, Ppup020690.1, Ppup022260.1, Ppup024220.1, Ppup025880.1, Ppup027260.1, Ppup028400.1, Ppup029370.1, Ppup030030.1, Ppup033140.1, Ppup033260.1, Ppup037910.1, Ppup040660.1, Ppup040690.1, Ppup044790.1, Ppup052290.1, Ppup062600.1, Ppup062660.1, Ppup075760.1, Ppup081980.1, Ppup082890.1, Ppup085530.1, Ppup092170.1, Ppup092480.1, Ppup094…
GO:0051246	BP	e	regulation of protein metabolic process	273/2424	862/10157	5.12001e-08	5	273	1.02199e-05	Ppup001710.1, Ppup001800.1, Ppup002450.1, Ppup003740.1, Ppup004410.1, Ppup004550.1, Ppup005280.1, Ppup005320.1, Ppup005470.1, Ppup006490.1, Ppup006720.1, Ppup008760.1, Ppup010070.1, Ppup010390.1, Ppup011260.1, Ppup012830.1, Ppup013130.1, Ppup013200.1, Ppup014250.1, Ppup016860.1, Ppup017930.1, Ppup018270.1, Ppup018680.1, Ppup019150.1, Ppup019810.1, Ppup020080.1, Ppup020310.1, Ppup021150.1, Ppup022…
GO:0008150	BP	e	biological_process	2149/2424	8665/10157	5.51677e-08	0	2149	1.08187e-05	Ppup000250.1, Ppup001710.1, Ppup001720.1, Ppup001730.1, Ppup001740.1, Ppup001760.1, Ppup001800.1, Ppup001810.1, Ppup001870.1, Ppup002230.1, Ppup002240.1, Ppup002250.1, Ppup002280.1, Ppup002290.1, Ppup002450.1, Ppup002480.1, Ppup002530.1, Ppup002680.1, Ppup002780.1, Ppup002790.1, Ppup002810.1, Ppup002870.1, Ppup002890.1, Ppup002900.1, Ppup002910.1, Ppup003030.1, Ppup003040.1, Ppup003070.1, Ppup003…
GO:0051649	BP	e	establishment of localization in cell	278/2424	882/10157	5.66656e-08	3	278	1.09208e-05	Ppup001870.1, Ppup003030.1, Ppup003070.1, Ppup003780.1, Ppup004080.1, Ppup004180.1, Ppup004330.1, Ppup004420.1, Ppup004540.1, Ppup005470.1, Ppup005830.1, Ppup006390.1, Ppup006440.1, Ppup006950.1, Ppup007130.1, Ppup007260.1, Ppup008770.1, Ppup008830.1, Ppup009830.1, Ppup010280.1, Ppup010330.1, Ppup010920.1, Ppup011180.1, Ppup011300.1, Ppup012590.1, Ppup012830.1, Ppup015740.1, Ppup015890.1, Ppup016…
GO:0031326	BP	e	regulation of cellular biosynthetic process	436/2424	1477/10157	6.99619e-08	5	436	1.32548e-05	Ppup001710.1, Ppup001870.1, Ppup002890.1, Ppup003100.1, Ppup003620.1, Ppup003740.1, Ppup004410.1, Ppup004550.1, Ppup005280.1, Ppup005320.1, Ppup005470.1, Ppup006210.1, Ppup006360.1, Ppup006660.1, Ppup006720.1, Ppup007300.1, Ppup007710.1, Ppup007830.1, Ppup008020.1, Ppup008030.1, Ppup008570.1, Ppup008760.1, Ppup009680.1, Ppup010940.1, Ppup011100.1, Ppup011120.1, Ppup011200.1, Ppup011560.1, Ppup013…
GO:0010556	BP	e	regulation of macromolecule biosynthetic process	426/2424	1445/10157	1.12672e-07	5	426	2.06467e-05	Ppup001710.1, Ppup001870.1, Ppup002890.1, Ppup003100.1, Ppup003620.1, Ppup003740.1, Ppup004410.1, Ppup004550.1, Ppup005280.1, Ppup005320.1, Ppup005470.1, Ppup006210.1, Ppup006360.1, Ppup006660.1, Ppup006720.1, Ppup007300.1, Ppup007710.1, Ppup007830.1, Ppup008020.1, Ppup008030.1, Ppup008570.1, Ppup008760.1, Ppup009680.1, Ppup010940.1, Ppup011100.1, Ppup011200.1, Ppup011560.1, Ppup013200.1, Ppup013…
GO:0032268	BP	e	regulation of cellular protein metabolic process	246/2424	770/10157	1.18866e-07	6	246	2.1303e-05	Ppup001710.1, Ppup001800.1, Ppup003740.1, Ppup004410.1, Ppup004550.1, Ppup005280.1, Ppup005320.1, Ppup005470.1, Ppup006490.1, Ppup006720.1, Ppup008760.1, Ppup010070.1, Ppup010390.1, Ppup011260.1, Ppup012830.1, Ppup013130.1, Ppup013200.1, Ppup014250.1, Ppup016860.1, Ppup017930.1, Ppup018270.1, Ppup018680.1, Ppup019810.1, Ppup020080.1, Ppup020310.1, Ppup021150.1, Ppup022170.1, Ppup024570.1, Ppup025…
GO:0051172	BP	e	negative regulation of nitrogen compound metabolic process	231/2424	716/10157	1.20065e-07	5	231	2.1303e-05	Ppup001710.1, Ppup003100.1, Ppup003620.1, Ppup003740.1, Ppup005320.1, Ppup005470.1, Ppup006360.1, Ppup006660.1, Ppup006720.1, Ppup008760.1, Ppup010070.1, Ppup010390.1, Ppup011100.1, Ppup011200.1, Ppup011260.1, Ppup011560.1, Ppup012830.1, Ppup013200.1, Ppup014250.1, Ppup015890.1, Ppup017950.1, Ppup018270.1, Ppup018600.1, Ppup018630.1, Ppup018690.1, Ppup018870.1, Ppup018890.1, Ppup019000.1, Ppup019…
GO:0033043	BP	e	regulation of organelle organization	182/2424	541/10157	1.42463e-07	5	182	2.4882e-05	Ppup001710.1, Ppup001800.1, Ppup005470.1, Ppup005490.1, Ppup006390.1, Ppup006440.1, Ppup006810.1, Ppup009190.1, Ppup011260.1, Ppup011300.1, Ppup016230.1, Ppup017480.1, Ppup017930.1, Ppup018270.1, Ppup018600.1, Ppup018680.1, Ppup018760.1, Ppup019810.1, Ppup021180.1, Ppup021210.1, Ppup021300.1, Ppup021570.1, Ppup022170.1, Ppup025690.1, Ppup025950.1, Ppup027250.1, Ppup027280.1, Ppup027780.1, Ppup028…
GO:0033036	BP	e	macromolecule localization	286/2424	919/10157	1.52941e-07	2	286	2.63012e-05	Ppup003030.1, Ppup003170.1, Ppup003230.1, Ppup003780.1, Ppup004150.1, Ppup004180.1, Ppup004330.1, Ppup004540.1, Ppup005830.1, Ppup005970.1, Ppup006390.1, Ppup006410.1, Ppup006490.1, Ppup006550.1, Ppup006730.1, Ppup006950.1, Ppup007170.1, Ppup007710.1, Ppup008770.1, Ppup009830.1, Ppup010280.1, Ppup011180.1, Ppup011220.1, Ppup011300.1, Ppup012830.1, Ppup013010.1, Ppup013930.1, Ppup015740.1, Ppup016…
GO:0036211	BP	e	protein modification process	375/2424	1255/10157	1.89298e-07	5	375	3.15817e-05	Ppup001710.1, Ppup001720.1, Ppup001730.1, Ppup001800.1, Ppup002450.1, Ppup002900.1, Ppup003120.1, Ppup003610.1, Ppup003620.1, Ppup004240.1, Ppup004410.1, Ppup004570.1, Ppup005260.1, Ppup005320.1, Ppup005470.1, Ppup006830.1, Ppup008630.1, Ppup008730.1, Ppup008760.1, Ppup008980.1, Ppup009730.1, Ppup010900.1, Ppup011260.1, Ppup011800.1, Ppup012810.1, Ppup012830.1, Ppup012980.1, Ppup013200.1, Ppup014…
GO:0006464	BP	e	cellular protein modification process	375/2424	1255/10157	1.89298e-07	6	375	3.15817e-05	Ppup001710.1, Ppup001720.1, Ppup001730.1, Ppup001800.1, Ppup002450.1, Ppup002900.1, Ppup003120.1, Ppup003610.1, Ppup003620.1, Ppup004240.1, Ppup004410.1, Ppup004570.1, Ppup005260.1, Ppup005320.1, Ppup005470.1, Ppup006830.1, Ppup008630.1, Ppup008730.1, Ppup008760.1, Ppup008980.1, Ppup009730.1, Ppup010900.1, Ppup011260.1, Ppup011800.1, Ppup012810.1, Ppup012830.1, Ppup012980.1, Ppup013200.1, Ppup014…
GO:2000112	BP	e	regulation of cellular macromolecule biosynthetic process	420/2424	1428/10157	2.01523e-07	6	420	3.31268e-05	Ppup001710.1, Ppup001870.1, Ppup002890.1, Ppup003100.1, Ppup003620.1, Ppup003740.1, Ppup004410.1, Ppup004550.1, Ppup005280.1, Ppup005470.1, Ppup006210.1, Ppup006360.1, Ppup006660.1, Ppup006720.1, Ppup007300.1, Ppup007710.1, Ppup007830.1, Ppup008020.1, Ppup008030.1, Ppup008570.1, Ppup008760.1, Ppup009680.1, Ppup010940.1, Ppup011100.1, Ppup011200.1, Ppup011560.1, Ppup013200.1, Ppup013940.1, Ppup014…
GO:0031325	BP	e	positive regulation of cellular metabolic process	336/2424	1110/10157	2.47191e-07	5	336	4.00449e-05	Ppup001870.1, Ppup003620.1, Ppup004410.1, Ppup004550.1, Ppup005280.1, Ppup005320.1, Ppup005940.1, Ppup006210.1, Ppup006490.1, Ppup006720.1, Ppup007300.1, Ppup007710.1, Ppup008030.1, Ppup008570.1, Ppup008760.1, Ppup011100.1, Ppup011120.1, Ppup013130.1, Ppup013200.1, Ppup014100.1, Ppup015730.1, Ppup016860.1, Ppup017930.1, Ppup017950.1, Ppup018270.1, Ppup018590.1, Ppup018630.1, Ppup018680.1, Ppup018…
GO:0031329	BP	e	regulation of cellular catabolic process	108/2424	290/10157	2.60946e-07	5	108	4.16693e-05	Ppup001710.1, Ppup004410.1, Ppup005320.1, Ppup005470.1, Ppup008760.1, Ppup011120.1, Ppup011260.1, Ppup011300.1, Ppup011730.1, Ppup015890.1, Ppup020080.1, Ppup020310.1, Ppup020690.1, Ppup021300.1, Ppup025880.1, Ppup025910.1, Ppup026550.1, Ppup026790.1, Ppup027120.1, Ppup027280.1, Ppup027520.1, Ppup028280.1, Ppup028400.1, Ppup029350.1, Ppup029460.1, Ppup030870.1, Ppup036470.1, Ppup037330.1, Ppup037…
GO:1903311	BP	e	regulation of mRNA metabolic process	66/2424	155/10157	2.94192e-07	7	66	4.63166e-05	Ppup001810.1, Ppup010940.1, Ppup011730.1, Ppup014110.1, Ppup015890.1, Ppup020310.1, Ppup024270.1, Ppup024750.1, Ppup026790.1, Ppup027070.1, Ppup027520.1, Ppup035260.1, Ppup036470.1, Ppup037010.1, Ppup040010.1, Ppup040060.1, Ppup046960.1, Ppup058640.1, Ppup059210.1, Ppup059780.1, Ppup064000.1, Ppup075680.1, Ppup075970.1, Ppup076900.1, Ppup077510.1, Ppup084660.1, Ppup085930.1, Ppup085980.1, Ppup086…
GO:0031324	BP	e	negative regulation of cellular metabolic process	249/2424	792/10157	4.40399e-07	5	249	6.74353e-05	Ppup001710.1, Ppup003100.1, Ppup003620.1, Ppup003740.1, Ppup005320.1, Ppup005470.1, Ppup006360.1, Ppup006660.1, Ppup006720.1, Ppup008760.1, Ppup010070.1, Ppup010390.1, Ppup011100.1, Ppup011120.1, Ppup011200.1, Ppup011260.1, Ppup011560.1, Ppup012830.1, Ppup013200.1, Ppup014250.1, Ppup015890.1, Ppup017950.1, Ppup018270.1, Ppup018600.1, Ppup018630.1, Ppup018690.1, Ppup018870.1, Ppup018890.1, Ppup019…
GO:0008104	BP	e	protein localization	274/2424	887/10157	5.70892e-07	3	274	8.62355e-05	Ppup003030.1, Ppup003170.1, Ppup003230.1, Ppup003780.1, Ppup004150.1, Ppup004180.1, Ppup004330.1, Ppup004540.1, Ppup005830.1, Ppup005970.1, Ppup006390.1, Ppup006410.1, Ppup006490.1, Ppup006550.1, Ppup006730.1, Ppup006950.1, Ppup007170.1, Ppup007710.1, Ppup008770.1, Ppup009830.1, Ppup010280.1, Ppup011180.1, Ppup011220.1, Ppup011300.1, Ppup012830.1, Ppup013010.1, Ppup013930.1, Ppup015740.1, Ppup016…
GO:0031399	BP	e	regulation of protein modification process	163/2424	484/10157	5.84874e-07	7	163	8.71697e-05	Ppup001800.1, Ppup004410.1, Ppup004550.1, Ppup005280.1, Ppup005320.1, Ppup005470.1, Ppup006490.1, Ppup006720.1, Ppup010070.1, Ppup013130.1, Ppup013200.1, Ppup014250.1, Ppup017930.1, Ppup018270.1, Ppup018680.1, Ppup019810.1, Ppup021150.1, Ppup022170.1, Ppup024570.1, Ppup026440.1, Ppup026960.1, Ppup027280.1, Ppup027410.1, Ppup027520.1, Ppup027810.1, Ppup028810.1, Ppup029910.1, Ppup030870.1, Ppup033…
GO:1903506	BP	e	regulation of nucleic acid-templated transcription	363/2424	1222/10157	6.28236e-07	8	363	9.24003e-05	Ppup001710.1, Ppup001870.1, Ppup002890.1, Ppup003100.1, Ppup003620.1, Ppup004410.1, Ppup004550.1, Ppup005280.1, Ppup005470.1, Ppup006210.1, Ppup006360.1, Ppup006660.1, Ppup007300.1, Ppup007710.1, Ppup007830.1, Ppup008020.1, Ppup008030.1, Ppup008570.1, Ppup008760.1, Ppup009680.1, Ppup010940.1, Ppup011100.1, Ppup011200.1, Ppup011560.1, Ppup013200.1, Ppup013940.1, Ppup014100.1, Ppup014260.1, Ppup014…
GO:2001141	BP	e	regulation of RNA biosynthetic process	363/2424	1223/10157	6.38063e-07	7	363	9.26269e-05	Ppup001710.1, Ppup001870.1, Ppup002890.1, Ppup003100.1, Ppup003620.1, Ppup004410.1, Ppup004550.1, Ppup005280.1, Ppup005470.1, Ppup006210.1, Ppup006360.1, Ppup006660.1, Ppup007300.1, Ppup007710.1, Ppup007830.1, Ppup008020.1, Ppup008030.1, Ppup008570.1, Ppup008760.1, Ppup009680.1, Ppup010940.1, Ppup011100.1, Ppup011200.1, Ppup011560.1, Ppup013200.1, Ppup013940.1, Ppup014100.1, Ppup014260.1, Ppup014…
GO:0019216	BP	e	regulation of lipid metabolic process	45/2424	96/10157	7.91806e-07	5	45	0.000113472	Ppup003100.1, Ppup005470.1, Ppup005940.1, Ppup011120.1, Ppup017930.1, Ppup019820.1, Ppup020690.1, Ppup021300.1, Ppup025880.1, Ppup028400.1, Ppup040660.1, Ppup043200.1, Ppup045850.1, Ppup046270.1, Ppup047250.1, Ppup051070.1, Ppup052580.1, Ppup054230.1, Ppup058400.1, Ppup060140.1, Ppup075750.1, Ppup077440.1, Ppup099800.1, Ppup102180.1, Ppup103510.1, Ppup104600.1, Ppup106130.1, Ppup109420.1, Ppup109…
GO:0045834	BP	e	positive regulation of lipid metabolic process	25/2424	42/10157	8.10116e-07	6	25	0.000114626	Ppup005940.1, Ppup011120.1, Ppup017930.1, Ppup021300.1, Ppup025880.1, Ppup040660.1, Ppup043200.1, Ppup046270.1, Ppup047250.1, Ppup052580.1, Ppup060140.1, Ppup075750.1, Ppup077440.1, Ppup103510.1, Ppup104600.1, Ppup109420.1, Ppup109430.1, Ppup110130.1, Ppup120140.1, Ppup126550.1, Ppup140050.1, Ppup140980.1, Ppup152730.1, Ppup153110.1, Ppup162270.1
GO:0006355	BP	e	regulation of transcription, DNA-templated	361/2424	1218/10157	8.77117e-07	9	361	0.000121773	Ppup001710.1, Ppup001870.1, Ppup002890.1, Ppup003100.1, Ppup003620.1, Ppup004410.1, Ppup004550.1, Ppup005280.1, Ppup005470.1, Ppup006210.1, Ppup006360.1, Ppup006660.1, Ppup007300.1, Ppup007710.1, Ppup007830.1, Ppup008020.1, Ppup008030.1, Ppup008570.1, Ppup008760.1, Ppup009680.1, Ppup010940.1, Ppup011100.1, Ppup011200.1, Ppup011560.1, Ppup013200.1, Ppup013940.1, Ppup014100.1, Ppup014260.1, Ppup014…
GO:0043412	BP	e	macromolecule modification	400/2424	1368/10157	8.82414e-07	4	400	0.000121773	Ppup001710.1, Ppup001720.1, Ppup001730.1, Ppup001800.1, Ppup002450.1, Ppup002900.1, Ppup003120.1, Ppup003610.1, Ppup003620.1, Ppup004240.1, Ppup004410.1, Ppup004570.1, Ppup005260.1, Ppup005320.1, Ppup005470.1, Ppup006720.1, Ppup006830.1, Ppup008630.1, Ppup008730.1, Ppup008760.1, Ppup008980.1, Ppup009730.1, Ppup010900.1, Ppup011260.1, Ppup011800.1, Ppup012810.1, Ppup012830.1, Ppup012980.1, Ppup013…
GO:0051253	BP	e	negative regulation of RNA metabolic process	151/2424	445/10157	8.98698e-07	7	151	0.000122508	Ppup003100.1, Ppup003620.1, Ppup005470.1, Ppup006360.1, Ppup006660.1, Ppup008760.1, Ppup011100.1, Ppup011200.1, Ppup011560.1, Ppup013200.1, Ppup015890.1, Ppup017950.1, Ppup018270.1, Ppup018600.1, Ppup018630.1, Ppup018690.1, Ppup018870.1, Ppup018890.1, Ppup019000.1, Ppup019150.1, Ppup019950.1, Ppup020310.1, Ppup022280.1, Ppup023730.1, Ppup024160.1, Ppup024730.1, Ppup025760.1, Ppup026550.1, Ppup026…
GO:2000113	BP	e	negative regulation of cellular macromolecule biosynthetic process	161/2424	480/10157	9.32933e-07	7	161	0.000125643	Ppup003100.1, Ppup003620.1, Ppup003740.1, Ppup006360.1, Ppup006660.1, Ppup008760.1, Ppup011100.1, Ppup011200.1, Ppup011560.1, Ppup013200.1, Ppup017950.1, Ppup018270.1, Ppup018600.1, Ppup018630.1, Ppup018690.1, Ppup018870.1, Ppup018890.1, Ppup019000.1, Ppup019150.1, Ppup019950.1, Ppup020310.1, Ppup021150.1, Ppup022280.1, Ppup024160.1, Ppup024730.1, Ppup025760.1, Ppup026550.1, Ppup026790.1, Ppup026…
GO:1905269	BP	e	positive regulation of chromatin organization	28/2424	50/10157	1.01326e-06	8	28	0.000134835	Ppup016230.1, Ppup019810.1, Ppup035070.1, Ppup035890.1, Ppup037880.1, Ppup039960.1, Ppup042410.1, Ppup043580.1, Ppup049720.1, Ppup055320.1, Ppup058840.1, Ppup061660.1, Ppup075380.1, Ppup080180.1, Ppup091190.1, Ppup103700.1, Ppup108340.1, Ppup122630.1, Ppup123820.1, Ppup130950.1, Ppup133560.1, Ppup140050.1, Ppup143120.1, Ppup143800.1, Ppup145760.1, Ppup154760.1, Ppup174120.1, Ppup176270.1
GO:0051239	BP	e	regulation of multicellular organismal process	276/2424	900/10157	1.03432e-06	3	276	0.000136019	Ppup001800.1, Ppup002780.1, Ppup002890.1, Ppup003170.1, Ppup003230.1, Ppup003910.1, Ppup004150.1, Ppup004180.1, Ppup004410.1, Ppup005280.1, Ppup005320.1, Ppup005470.1, Ppup005490.1, Ppup006350.1, Ppup006950.1, Ppup006990.1, Ppup007690.1, Ppup008680.1, Ppup010280.1, Ppup011120.1, Ppup011220.1, Ppup014250.1, Ppup017950.1, Ppup018070.1, Ppup018590.1, Ppup018680.1, Ppup018760.1, Ppup018960.1, Ppup019…
GO:0010558	BP	e	negative regulation of macromolecule biosynthetic process	163/2424	488/10157	1.13104e-06	6	163	0.000147009	Ppup003100.1, Ppup003620.1, Ppup003740.1, Ppup005320.1, Ppup006360.1, Ppup006660.1, Ppup008760.1, Ppup011100.1, Ppup011200.1, Ppup011560.1, Ppup013200.1, Ppup017950.1, Ppup018270.1, Ppup018600.1, Ppup018630.1, Ppup018690.1, Ppup018870.1, Ppup018890.1, Ppup019000.1, Ppup019150.1, Ppup019950.1, Ppup020310.1, Ppup021150.1, Ppup022280.1, Ppup024160.1, Ppup024730.1, Ppup025760.1, Ppup026550.1, Ppup026…
GO:0031327	BP	e	negative regulation of cellular biosynthetic process	164/2424	492/10157	1.2446e-06	6	164	0.00015991	Ppup003100.1, Ppup003620.1, Ppup003740.1, Ppup005320.1, Ppup006360.1, Ppup006660.1, Ppup008760.1, Ppup011100.1, Ppup011200.1, Ppup011560.1, Ppup013200.1, Ppup017950.1, Ppup018270.1, Ppup018600.1, Ppup018630.1, Ppup018690.1, Ppup018870.1, Ppup018890.1, Ppup019000.1, Ppup019150.1, Ppup019950.1, Ppup020310.1, Ppup021150.1, Ppup022280.1, Ppup024160.1, Ppup024730.1, Ppup025760.1, Ppup026550.1, Ppup026…
GO:0006820	BP	e	anion transport	85/2424	222/10157	1.3826e-06	5	85	0.000175622	Ppup002250.1, Ppup004080.1, Ppup004420.1, Ppup007130.1, Ppup010230.1, Ppup019440.1, Ppup020100.1, Ppup024330.1, Ppup025130.1, Ppup025890.1, Ppup028060.1, Ppup030030.1, Ppup031080.1, Ppup031630.1, Ppup031750.1, Ppup035920.1, Ppup038150.1, Ppup040030.1, Ppup043200.1, Ppup046230.1, Ppup047250.1, Ppup048030.1, Ppup051070.1, Ppup053500.1, Ppup053760.1, Ppup055920.1, Ppup057970.1, Ppup058400.1, Ppup060…
GO:0050793	BP	e	regulation of developmental process	264/2424	858/10157	1.40164e-06	3	264	0.00017604	Ppup001800.1, Ppup001870.1, Ppup002890.1, Ppup003100.1, Ppup003170.1, Ppup004180.1, Ppup004410.1, Ppup005320.1, Ppup005470.1, Ppup005490.1, Ppup005940.1, Ppup006350.1, Ppup006950.1, Ppup007690.1, Ppup008020.1, Ppup008680.1, Ppup010280.1, Ppup011560.1, Ppup017950.1, Ppup018590.1, Ppup018680.1, Ppup018760.1, Ppup018960.1, Ppup019100.1, Ppup019160.1, Ppup019930.1, Ppup020310.1, Ppup020690.1, Ppup021…
GO:0000184	BP	e	nuclear-transcribed mRNA catabolic process, nonsense-mediated decay	20/2424	31/10157	1.73156e-06	10	20	0.00021506	Ppup040060.1, Ppup062360.1, Ppup063920.1, Ppup069530.1, Ppup081980.1, Ppup085930.1, Ppup106600.1, Ppup111560.1, Ppup114880.1, Ppup122820.1, Ppup130210.1, Ppup139980.1, Ppup140390.1, Ppup141140.1, Ppup154750.1, Ppup161050.1, Ppup168280.1, Ppup171890.1, Ppup174190.1, Ppup175850.1
GO:0000381	BP	e	regulation of alternative mRNA splicing, via spliceosome	29/2424	53/10157	1.7555e-06	10	29	0.000215637	Ppup010940.1, Ppup014110.1, Ppup024270.1, Ppup024750.1, Ppup027070.1, Ppup035260.1, Ppup037010.1, Ppup046960.1, Ppup075680.1, Ppup075970.1, Ppup077510.1, Ppup085930.1, Ppup085980.1, Ppup092260.1, Ppup095370.1, Ppup096090.1, Ppup096760.1, Ppup104050.1, Ppup104060.1, Ppup115130.1, Ppup115630.1, Ppup123010.1, Ppup130520.1, Ppup130950.1, Ppup134050.1, Ppup139070.1, Ppup139080.1, Ppup168280.1, Ppup173…
GO:0009890	BP	e	negative regulation of biosynthetic process	165/2424	499/10157	1.934e-06	5	165	0.000234981	Ppup003100.1, Ppup003620.1, Ppup003740.1, Ppup005320.1, Ppup006360.1, Ppup006660.1, Ppup008760.1, Ppup011100.1, Ppup011120.1, Ppup011200.1, Ppup011560.1, Ppup013200.1, Ppup017950.1, Ppup018270.1, Ppup018600.1, Ppup018630.1, Ppup018690.1, Ppup018870.1, Ppup018890.1, Ppup019000.1, Ppup019150.1, Ppup019950.1, Ppup020310.1, Ppup021150.1, Ppup022280.1, Ppup024160.1, Ppup024730.1, Ppup025760.1, Ppup026…
GO:0031401	BP	e	positive regulation of protein modification process	107/2424	298/10157	2.30436e-06	8	107	0.000276969	Ppup004410.1, Ppup004550.1, Ppup005280.1, Ppup006490.1, Ppup013130.1, Ppup013200.1, Ppup017930.1, Ppup018680.1, Ppup019810.1, Ppup022170.1, Ppup024570.1, Ppup026440.1, Ppup026960.1, Ppup027410.1, Ppup027810.1, Ppup028810.1, Ppup030870.1, Ppup035070.1, Ppup035890.1, Ppup035940.1, Ppup036080.1, Ppup036980.1, Ppup037560.1, Ppup037880.1, Ppup039960.1, Ppup040150.1, Ppup042410.1, Ppup043580.1, Ppup044…
GO:1902532	BP	e	negative regulation of intracellular signal transduction	52/2424	120/10157	2.40562e-06	7	52	0.000286064	Ppup005490.1, Ppup005940.1, Ppup008700.1, Ppup009230.1, Ppup009730.1, Ppup010070.1, Ppup012830.1, Ppup014250.1, Ppup016190.1, Ppup018870.1, Ppup021300.1, Ppup026960.1, Ppup027280.1, Ppup027490.1, Ppup030870.1, Ppup036980.1, Ppup045860.1, Ppup046770.1, Ppup054230.1, Ppup057830.1, Ppup065950.1, Ppup075720.1, Ppup076390.1, Ppup083600.1, Ppup086580.1, Ppup092000.1, Ppup094070.1, Ppup096980.1, Ppup104…
GO:0035556	BP	e	intracellular signal transduction	154/2424	462/10157	2.44482e-06	5	154	0.000286457	Ppup002870.1, Ppup003170.1, Ppup003230.1, Ppup004450.1, Ppup005470.1, Ppup008630.1, Ppup008680.1, Ppup008760.1, Ppup009730.1, Ppup010070.1, Ppup011260.1, Ppup011620.1, Ppup016230.1, Ppup017410.1, Ppup018270.1, Ppup018610.1, Ppup018760.1, Ppup020290.1, Ppup021180.1, Ppup021300.1, Ppup022170.1, Ppup024220.1, Ppup025490.1, Ppup026440.1, Ppup027240.1, Ppup027520.1, Ppup027810.1, Ppup028260.1, Ppup028…
GO:0032502	BP	e	developmental process	622/2424	2250/10157	2.46018e-06	1	622	0.000286457	Ppup001710.1, Ppup001800.1, Ppup001870.1, Ppup002900.1, Ppup002910.1, Ppup003100.1, Ppup003170.1, Ppup003740.1, Ppup003910.1, Ppup004180.1, Ppup004410.1, Ppup005460.1, Ppup005470.1, Ppup005600.1, Ppup006210.1, Ppup006350.1, Ppup006360.1, Ppup006410.1, Ppup006440.1, Ppup006500.1, Ppup006660.1, Ppup006730.1, Ppup006950.1, Ppup007260.1, Ppup007460.1, Ppup007560.1, Ppup007690.1, Ppup008020.1, Ppup008…
GO:0000956	BP	e	nuclear-transcribed mRNA catabolic process	36/2424	73/10157	2.49656e-06	9	36	0.000287696	Ppup014330.1, Ppup025790.1, Ppup026790.1, Ppup027520.1, Ppup031100.1, Ppup037010.1, Ppup040060.1, Ppup043500.1, Ppup062360.1, Ppup063920.1, Ppup069530.1, Ppup081980.1, Ppup084660.1, Ppup085930.1, Ppup094560.1, Ppup106600.1, Ppup109030.1, Ppup111560.1, Ppup114880.1, Ppup122610.1, Ppup122820.1, Ppup130210.1, Ppup138980.1, Ppup139980.1, Ppup140390.1, Ppup141140.1, Ppup141700.1, Ppup141730.1, Ppup144…
GO:0046907	BP	e	intracellular transport	220/2424	701/10157	2.6399e-06	4	220	0.00030111	Ppup003030.1, Ppup003070.1, Ppup003780.1, Ppup004080.1, Ppup004180.1, Ppup004330.1, Ppup004540.1, Ppup005470.1, Ppup006390.1, Ppup006950.1, Ppup007260.1, Ppup008770.1, Ppup009830.1, Ppup011180.1, Ppup011300.1, Ppup012590.1, Ppup012830.1, Ppup015740.1, Ppup016860.1, Ppup018600.1, Ppup018840.1, Ppup019690.1, Ppup019820.1, Ppup020270.1, Ppup020290.1, Ppup020500.1, Ppup021570.1, Ppup021780.1, Ppup021…
GO:0015698	BP	e	inorganic anion transport	21/2424	34/10157	2.68525e-06	6	21	0.000303189	Ppup002250.1, Ppup019440.1, Ppup020100.1, Ppup025890.1, Ppup031750.1, Ppup040030.1, Ppup046230.1, Ppup048030.1, Ppup053760.1, Ppup055920.1, Ppup071180.1, Ppup073340.1, Ppup076180.1, Ppup085610.1, Ppup085660.1, Ppup091990.1, Ppup097320.1, Ppup106580.1, Ppup109260.1, Ppup122620.1, Ppup162630.1
GO:0051247	BP	e	positive regulation of protein metabolic process	153/2424	460/10157	3.07049e-06	6	153	0.000343219	Ppup004410.1, Ppup004550.1, Ppup005280.1, Ppup005320.1, Ppup006490.1, Ppup006720.1, Ppup008760.1, Ppup013130.1, Ppup013200.1, Ppup016860.1, Ppup017930.1, Ppup018680.1, Ppup019810.1, Ppup020080.1, Ppup022170.1, Ppup024570.1, Ppup026440.1, Ppup026960.1, Ppup027410.1, Ppup027810.1, Ppup028810.1, Ppup029460.1, Ppup030870.1, Ppup035070.1, Ppup035890.1, Ppup035940.1, Ppup036080.1, Ppup036980.1, Ppup037…
GO:0006402	BP	e	mRNA catabolic process	39/2424	83/10157	3.74915e-06	8	39	0.000414931	Ppup014330.1, Ppup025790.1, Ppup026790.1, Ppup027520.1, Ppup031100.1, Ppup037010.1, Ppup040010.1, Ppup040060.1, Ppup043500.1, Ppup062360.1, Ppup063920.1, Ppup064000.1, Ppup069530.1, Ppup081980.1, Ppup084660.1, Ppup085930.1, Ppup094560.1, Ppup106600.1, Ppup109030.1, Ppup111560.1, Ppup114880.1, Ppup122610.1, Ppup122820.1, Ppup130210.1, Ppup138980.1, Ppup139980.1, Ppup140390.1, Ppup141140.1, Ppup141…
GO:0010604	BP	e	positive regulation of macromolecule metabolic process	332/2424	1128/10157	5.06426e-06	5	332	0.000554984	Ppup001870.1, Ppup003230.1, Ppup003620.1, Ppup004410.1, Ppup004550.1, Ppup005280.1, Ppup005320.1, Ppup005470.1, Ppup006210.1, Ppup006490.1, Ppup006720.1, Ppup007300.1, Ppup007710.1, Ppup008030.1, Ppup008570.1, Ppup008760.1, Ppup009830.1, Ppup011100.1, Ppup013130.1, Ppup013200.1, Ppup014100.1, Ppup015730.1, Ppup015890.1, Ppup016230.1, Ppup016860.1, Ppup017930.1, Ppup017950.1, Ppup018270.1, Ppup018…
GO:0009628	BP	e	response to abiotic stimulus	133/2424	392/10157	5.19842e-06	2	133	0.000564155	Ppup001720.1, Ppup002240.1, Ppup002900.1, Ppup004150.1, Ppup004450.1, Ppup005470.1, Ppup009230.1, Ppup009340.1, Ppup010470.1, Ppup011260.1, Ppup017950.1, Ppup018070.1, Ppup018300.1, Ppup019150.1, Ppup019460.1, Ppup021070.1, Ppup021090.1, Ppup021150.1, Ppup021470.1, Ppup024560.1, Ppup025100.1, Ppup027250.1, Ppup027280.1, Ppup027810.1, Ppup028600.1, Ppup030870.1, Ppup031700.1, Ppup035800.1, Ppup037…
GO:0006644	BP	e	phospholipid metabolic process	70/2424	180/10157	5.65341e-06	5	70	0.000607633	Ppup001870.1, Ppup004080.1, Ppup004450.1, Ppup006440.1, Ppup010210.1, Ppup017930.1, Ppup020690.1, Ppup022260.1, Ppup024220.1, Ppup026430.1, Ppup027260.1, Ppup028400.1, Ppup029370.1, Ppup030030.1, Ppup033140.1, Ppup033260.1, Ppup035350.1, Ppup037910.1, Ppup038150.1, Ppup040660.1, Ppup040690.1, Ppup040870.1, Ppup044790.1, Ppup046270.1, Ppup062660.1, Ppup070660.1, Ppup075760.1, Ppup081980.1, Ppup082…
GO:0009056	BP	e	catabolic process	331/2424	1126/10157	5.94311e-06	2	331	0.000632686	Ppup001710.1, Ppup001760.1, Ppup001870.1, Ppup002240.1, Ppup002290.1, Ppup002450.1, Ppup002530.1, Ppup002680.1, Ppup002780.1, Ppup002900.1, Ppup003610.1, Ppup004410.1, Ppup004570.1, Ppup005210.1, Ppup005460.1, Ppup005470.1, Ppup006440.1, Ppup006490.1, Ppup006830.1, Ppup008760.1, Ppup009900.1, Ppup011120.1, Ppup011300.1, Ppup012830.1, Ppup014330.1, Ppup015760.1, Ppup017930.1, Ppup018680.1, Ppup018…
GO:0010638	BP	e	positive regulation of organelle organization	86/2424	233/10157	7.74971e-06	6	86	0.000817229	Ppup006390.1, Ppup006440.1, Ppup016230.1, Ppup017930.1, Ppup018270.1, Ppup018600.1, Ppup019810.1, Ppup021210.1, Ppup027280.1, Ppup029460.1, Ppup031100.1, Ppup031510.1, Ppup035070.1, Ppup035890.1, Ppup037880.1, Ppup039960.1, Ppup040260.1, Ppup042150.1, Ppup042410.1, Ppup043580.1, Ppup044250.1, Ppup046970.1, Ppup047070.1, Ppup047890.1, Ppup049720.1, Ppup050170.1, Ppup052230.1, Ppup055320.1, Ppup057…
GO:0051173	BP	e	positive regulation of nitrogen compound metabolic process	308/2424	1042/10157	8.34424e-06	5	308	0.0008717	Ppup001870.1, Ppup003620.1, Ppup004410.1, Ppup004550.1, Ppup005280.1, Ppup005320.1, Ppup006210.1, Ppup006490.1, Ppup006720.1, Ppup007300.1, Ppup007710.1, Ppup008030.1, Ppup008570.1, Ppup008760.1, Ppup011100.1, Ppup013130.1, Ppup013200.1, Ppup014100.1, Ppup015730.1, Ppup016860.1, Ppup017930.1, Ppup017950.1, Ppup018270.1, Ppup018590.1, Ppup018630.1, Ppup018680.1, Ppup018690.1, Ppup018960.1, Ppup019…
GO:0032879	BP	e	regulation of localization	250/2424	823/10157	8.74866e-06	3	250	0.000905486	Ppup002250.1, Ppup002780.1, Ppup003070.1, Ppup003170.1, Ppup003230.1, Ppup003910.1, Ppup004150.1, Ppup004180.1, Ppup005470.1, Ppup005490.1, Ppup005940.1, Ppup006490.1, Ppup007130.1, Ppup007260.1, Ppup008830.1, Ppup009830.1, Ppup010280.1, Ppup010330.1, Ppup011220.1, Ppup011470.1, Ppup012830.1, Ppup013930.1, Ppup014250.1, Ppup014360.1, Ppup015730.1, Ppup017930.1, Ppup018550.1, Ppup018600.1, Ppup019…
GO:0008582	BP	e	regulation of synaptic growth at neuromuscular junction	23/2424	41/10157	9.0309e-06	7	23	0.000926123	Ppup008680.1, Ppup022170.1, Ppup027690.1, Ppup039090.1, Ppup046770.1, Ppup048860.1, Ppup059940.1, Ppup064250.1, Ppup071370.1, Ppup074880.1, Ppup084450.1, Ppup090820.1, Ppup101280.1, Ppup109360.1, Ppup112480.1, Ppup120140.1, Ppup126170.1, Ppup133890.1, Ppup150610.1, Ppup151290.1, Ppup167630.1, Ppup168760.1, Ppup174910.1
GO:0051130	BP	e	positive regulation of cellular component organization	145/2424	439/10157	9.55346e-06	5	145	0.000970805	Ppup003070.1, Ppup003910.1, Ppup005280.1, Ppup005970.1, Ppup006390.1, Ppup006440.1, Ppup006490.1, Ppup006950.1, Ppup008680.1, Ppup010280.1, Ppup016230.1, Ppup017930.1, Ppup018070.1, Ppup018270.1, Ppup018600.1, Ppup018680.1, Ppup018760.1, Ppup019810.1, Ppup021210.1, Ppup022170.1, Ppup024690.1, Ppup027280.1, Ppup027500.1, Ppup029460.1, Ppup030870.1, Ppup031100.1, Ppup031510.1, Ppup035070.1, Ppup035…
GO:0006650	BP	e	glycerophospholipid metabolic process	50/2424	118/10157	9.67496e-06	6	50	0.000974294	Ppup004450.1, Ppup006440.1, Ppup010210.1, Ppup017930.1, Ppup020690.1, Ppup022260.1, Ppup024220.1, Ppup027260.1, Ppup028400.1, Ppup029370.1, Ppup030030.1, Ppup033140.1, Ppup033260.1, Ppup037910.1, Ppup040660.1, Ppup040690.1, Ppup044790.1, Ppup062660.1, Ppup075760.1, Ppup081980.1, Ppup082890.1, Ppup085530.1, Ppup092170.1, Ppup092480.1, Ppup094070.1, Ppup094670.1, Ppup106250.1, Ppup106260.1, Ppup106…
GO:1902903	BP	e	regulation of supramolecular fiber organization	51/2424	122/10157	1.37518e-05	5	51	0.00137248	Ppup005490.1, Ppup006810.1, Ppup009190.1, Ppup018600.1, Ppup021210.1, Ppup022170.1, Ppup027280.1, Ppup036980.1, Ppup042150.1, Ppup043440.1, Ppup044250.1, Ppup057310.1, Ppup064390.1, Ppup071370.1, Ppup075230.1, Ppup077190.1, Ppup080260.1, Ppup084280.1, Ppup084510.1, Ppup086470.1, Ppup086510.1, Ppup086990.1, Ppup087280.1, Ppup090820.1, Ppup094070.1, Ppup098040.1, Ppup101280.1, Ppup103270.1, Ppup106…
GO:0030036	BP	e	actin cytoskeleton organization	67/2424	174/10157	1.39057e-05	6	67	0.00137556	Ppup003170.1, Ppup003910.1, Ppup005490.1, Ppup006500.1, Ppup013930.1, Ppup020230.1, Ppup020360.1, Ppup020370.1, Ppup021210.1, Ppup022170.1, Ppup025490.1, Ppup026370.1, Ppup027500.1, Ppup036980.1, Ppup042150.1, Ppup043440.1, Ppup043740.1, Ppup044250.1, Ppup046730.1, Ppup049290.1, Ppup049760.1, Ppup052710.1, Ppup053540.1, Ppup057310.1, Ppup057910.1, Ppup058240.1, Ppup059740.1, Ppup064390.1, Ppup070…
GO:0065009	BP	e	regulation of molecular function	197/2424	632/10157	1.70167e-05	2	197	0.00165403	Ppup003100.1, Ppup003170.1, Ppup003230.1, Ppup003910.1, Ppup004150.1, Ppup005280.1, Ppup005320.1, Ppup005470.1, Ppup006720.1, Ppup006810.1, Ppup007260.1, Ppup008760.1, Ppup009830.1, Ppup010280.1, Ppup010390.1, Ppup011220.1, Ppup011300.1, Ppup012830.1, Ppup013130.1, Ppup013200.1, Ppup015730.1, Ppup017930.1, Ppup018680.1, Ppup018760.1, Ppup018860.1, Ppup019150.1, Ppup019820.1, Ppup020270.1, Ppup021…
GO:0006629	BP	e	lipid metabolic process	182/2424	579/10157	1.88868e-05	3	182	0.00181997	Ppup001760.1, Ppup001870.1, Ppup002240.1, Ppup002530.1, Ppup002680.1, Ppup003590.1, Ppup003830.1, Ppup004080.1, Ppup004240.1, Ppup004450.1, Ppup005460.1, Ppup005470.1, Ppup006190.1, Ppup006440.1, Ppup010210.1, Ppup011120.1, Ppup011610.1, Ppup011620.1, Ppup017930.1, Ppup018240.1, Ppup019930.1, Ppup020690.1, Ppup021420.1, Ppup022030.1, Ppup022260.1, Ppup024220.1, Ppup025880.1, Ppup026430.1, Ppup027…
GO:0006641	BP	e	triglyceride metabolic process	13/2424	18/10157	1.96538e-05	7	13	0.00187769	Ppup025880.1, Ppup062600.1, Ppup092170.1, Ppup101160.1, Ppup106350.1, Ppup113500.1, Ppup130100.1, Ppup136110.1, Ppup137390.1, Ppup140980.1, Ppup153110.1, Ppup153590.1, Ppup162420.1
GO:0044255	BP	e	cellular lipid metabolic process	151/2424	468/10157	2.31621e-05	4	151	0.00217435	Ppup001760.1, Ppup001870.1, Ppup002240.1, Ppup002530.1, Ppup002680.1, Ppup003590.1, Ppup004080.1, Ppup004240.1, Ppup004450.1, Ppup005460.1, Ppup005470.1, Ppup006190.1, Ppup006440.1, Ppup010210.1, Ppup011120.1, Ppup011620.1, Ppup017930.1, Ppup018240.1, Ppup020690.1, Ppup022030.1, Ppup022260.1, Ppup024220.1, Ppup025880.1, Ppup026430.1, Ppup027260.1, Ppup027910.1, Ppup027920.1, Ppup027930.1, Ppup028…
GO:0008654	BP	e	phospholipid biosynthetic process	43/2424	99/10157	2.32473e-05	6	43	0.00217435	Ppup001870.1, Ppup004450.1, Ppup006440.1, Ppup017930.1, Ppup020690.1, Ppup027260.1, Ppup028400.1, Ppup030030.1, Ppup035350.1, Ppup037910.1, Ppup040660.1, Ppup040690.1, Ppup040870.1, Ppup044790.1, Ppup046270.1, Ppup062660.1, Ppup085530.1, Ppup085970.1, Ppup092170.1, Ppup095540.1, Ppup095760.1, Ppup106250.1, Ppup106260.1, Ppup106700.1, Ppup115200.1, Ppup122020.1, Ppup123980.1, Ppup126400.1, Ppup127…
GO:0090407	BP	e	organophosphate biosynthetic process	89/2424	250/10157	2.33425e-05	5	89	0.00217435	Ppup001740.1, Ppup001870.1, Ppup003740.1, Ppup004450.1, Ppup004480.1, Ppup005850.1, Ppup006440.1, Ppup009850.1, Ppup011470.1, Ppup016890.1, Ppup017930.1, Ppup020690.1, Ppup027260.1, Ppup028400.1, Ppup030030.1, Ppup035350.1, Ppup037910.1, Ppup040660.1, Ppup040690.1, Ppup040870.1, Ppup044790.1, Ppup045850.1, Ppup046270.1, Ppup046280.1, Ppup050190.1, Ppup052580.1, Ppup052600.1, Ppup058980.1, Ppup062…
GO:0048024	BP	e	regulation of mRNA splicing, via spliceosome	33/2424	70/10157	2.65018e-05	9	33	0.00244824	Ppup001810.1, Ppup010940.1, Ppup014110.1, Ppup024270.1, Ppup024750.1, Ppup027070.1, Ppup035260.1, Ppup037010.1, Ppup046960.1, Ppup059210.1, Ppup075680.1, Ppup075970.1, Ppup077510.1, Ppup085930.1, Ppup085980.1, Ppup092260.1, Ppup095370.1, Ppup096090.1, Ppup096760.1, Ppup104050.1, Ppup104060.1, Ppup112260.1, Ppup115130.1, Ppup115630.1, Ppup123010.1, Ppup123910.1, Ppup130520.1, Ppup130950.1, Ppup134…
GO:0032956	BP	e	regulation of actin cytoskeleton organization	47/2424	112/10157	2.70857e-05	7	47	0.00248168	Ppup005490.1, Ppup006810.1, Ppup009190.1, Ppup018600.1, Ppup021210.1, Ppup022170.1, Ppup027280.1, Ppup028810.1, Ppup036980.1, Ppup042150.1, Ppup043440.1, Ppup044250.1, Ppup057310.1, Ppup064390.1, Ppup071370.1, Ppup075230.1, Ppup084230.1, Ppup084280.1, Ppup084510.1, Ppup086470.1, Ppup086990.1, Ppup090820.1, Ppup094070.1, Ppup098040.1, Ppup101280.1, Ppup103270.1, Ppup109160.1, Ppup110820.1, Ppup114…
GO:0050684	BP	e	regulation of mRNA processing	43/2424	101/10157	3.06456e-05	8	43	0.00278501	Ppup001810.1, Ppup010940.1, Ppup014110.1, Ppup024270.1, Ppup024750.1, Ppup027070.1, Ppup035260.1, Ppup037010.1, Ppup046960.1, Ppup059210.1, Ppup059780.1, Ppup075680.1, Ppup075970.1, Ppup077510.1, Ppup085930.1, Ppup085980.1, Ppup090910.1, Ppup092260.1, Ppup095370.1, Ppup096090.1, Ppup096760.1, Ppup103700.1, Ppup104050.1, Ppup104060.1, Ppup112260.1, Ppup115130.1, Ppup115630.1, Ppup123010.1, Ppup123…
GO:0015031	BP	e	protein transport	199/2424	647/10157	3.28684e-05	7	199	0.00292853	Ppup003030.1, Ppup003230.1, Ppup003780.1, Ppup004180.1, Ppup004330.1, Ppup004540.1, Ppup005830.1, Ppup006390.1, Ppup006410.1, Ppup006490.1, Ppup006550.1, Ppup006730.1, Ppup006950.1, Ppup007170.1, Ppup008770.1, Ppup009830.1, Ppup011180.1, Ppup011300.1, Ppup012830.1, Ppup013010.1, Ppup015740.1, Ppup017870.1, Ppup018840.1, Ppup019990.1, Ppup020270.1, Ppup020290.1, Ppup020500.1, Ppup020630.1, Ppup021…
GO:0046890	BP	e	regulation of lipid biosynthetic process	24/2424	46/10157	3.32728e-05	6	24	0.00292853	Ppup011120.1, Ppup017930.1, Ppup040660.1, Ppup043200.1, Ppup045850.1, Ppup046270.1, Ppup047250.1, Ppup051070.1, Ppup060140.1, Ppup075750.1, Ppup102180.1, Ppup103510.1, Ppup104600.1, Ppup106130.1, Ppup109420.1, Ppup109430.1, Ppup110130.1, Ppup126800.1, Ppup140050.1, Ppup152730.1, Ppup153110.1, Ppup160900.1, Ppup162270.1, Ppup171790.1
GO:1904396	BP	e	regulation of neuromuscular junction development	24/2424	46/10157	3.32728e-05	6	24	0.00292853	Ppup008680.1, Ppup022170.1, Ppup027690.1, Ppup039090.1, Ppup046770.1, Ppup048860.1, Ppup059940.1, Ppup064250.1, Ppup071370.1, Ppup074880.1, Ppup084450.1, Ppup090820.1, Ppup101280.1, Ppup103510.1, Ppup109360.1, Ppup112480.1, Ppup120140.1, Ppup126170.1, Ppup133890.1, Ppup150610.1, Ppup151290.1, Ppup167630.1, Ppup168760.1, Ppup174910.1
GO:0046889	BP	e	positive regulation of lipid biosynthetic process	17/2424	28/10157	3.37869e-05	7	17	0.00295054	Ppup011120.1, Ppup017930.1, Ppup040660.1, Ppup043200.1, Ppup046270.1, Ppup047250.1, Ppup060140.1, Ppup075750.1, Ppup103510.1, Ppup104600.1, Ppup109420.1, Ppup109430.1, Ppup110130.1, Ppup140050.1, Ppup152730.1, Ppup153110.1, Ppup162270.1
GO:0015807	BP	e	L-amino acid transport	14/2424	21/10157	3.8268e-05	9	14	0.00331597	Ppup004420.1, Ppup028060.1, Ppup031630.1, Ppup077110.1, Ppup085610.1, Ppup086080.1, Ppup106580.1, Ppup114070.1, Ppup130380.1, Ppup132870.1, Ppup136740.1, Ppup141890.1, Ppup153300.1, Ppup154630.1
GO:0032535	BP	e	regulation of cellular component size	52/2424	129/10157	3.91254e-05	4	52	0.00336418	Ppup005490.1, Ppup006810.1, Ppup009190.1, Ppup018600.1, Ppup020100.1, Ppup021210.1, Ppup021300.1, Ppup022170.1, Ppup027280.1, Ppup031080.1, Ppup036980.1, Ppup042150.1, Ppup043440.1, Ppup044250.1, Ppup046770.1, Ppup064390.1, Ppup071180.1, Ppup071370.1, Ppup075230.1, Ppup075410.1, Ppup084280.1, Ppup084350.1, Ppup084510.1, Ppup086470.1, Ppup086990.1, Ppup090820.1, Ppup098040.1, Ppup101280.1, Ppup106…
GO:0007010	BP	e	cytoskeleton organization	144/2424	446/10157	4.03013e-05	5	144	0.00343884	Ppup003170.1, Ppup003910.1, Ppup005490.1, Ppup006500.1, Ppup006950.1, Ppup007460.1, Ppup008980.1, Ppup009830.1, Ppup010900.1, Ppup013930.1, Ppup018680.1, Ppup018760.1, Ppup019100.1, Ppup019160.1, Ppup020230.1, Ppup020360.1, Ppup020370.1, Ppup020500.1, Ppup021210.1, Ppup022170.1, Ppup025490.1, Ppup026370.1, Ppup027050.1, Ppup027500.1, Ppup035600.1, Ppup036980.1, Ppup039150.1, Ppup040210.1, Ppup040…
GO:0015833	BP	e	peptide transport	199/2424	649/10157	4.13703e-05	6	199	0.0034878	Ppup003030.1, Ppup003230.1, Ppup003780.1, Ppup004180.1, Ppup004330.1, Ppup004540.1, Ppup005830.1, Ppup006390.1, Ppup006410.1, Ppup006490.1, Ppup006550.1, Ppup006730.1, Ppup006950.1, Ppup007170.1, Ppup008770.1, Ppup009830.1, Ppup011180.1, Ppup011300.1, Ppup012830.1, Ppup013010.1, Ppup015740.1, Ppup017870.1, Ppup018840.1, Ppup019990.1, Ppup020270.1, Ppup020290.1, Ppup020500.1, Ppup020630.1, Ppup021…
GO:0030029	BP	e	actin filament-based process	70/2424	188/10157	4.17262e-05	2	70	0.0034878	Ppup003170.1, Ppup003910.1, Ppup005490.1, Ppup006500.1, Ppup013930.1, Ppup020230.1, Ppup020360.1, Ppup020370.1, Ppup021210.1, Ppup022170.1, Ppup025490.1, Ppup026370.1, Ppup027500.1, Ppup036980.1, Ppup042150.1, Ppup043440.1, Ppup043740.1, Ppup044250.1, Ppup046730.1, Ppup049290.1, Ppup049760.1, Ppup052710.1, Ppup053540.1, Ppup057310.1, Ppup057910.1, Ppup058240.1, Ppup058840.1, Ppup059740.1, Ppup064…
GO:0042886	BP	e	amide transport	204/2424	667/10157	4.18111e-05	5	204	0.0034878	Ppup003030.1, Ppup003230.1, Ppup003780.1, Ppup004180.1, Ppup004330.1, Ppup004540.1, Ppup005830.1, Ppup006390.1, Ppup006410.1, Ppup006490.1, Ppup006550.1, Ppup006730.1, Ppup006950.1, Ppup007170.1, Ppup008770.1, Ppup009830.1, Ppup011180.1, Ppup011300.1, Ppup012830.1, Ppup013010.1, Ppup015740.1, Ppup017870.1, Ppup018840.1, Ppup019990.1, Ppup020270.1, Ppup020290.1, Ppup020500.1, Ppup020630.1, Ppup021…
GO:1901888	BP	e	regulation of cell junction assembly	35/2424	78/10157	4.4801e-05	5	35	0.00368919	Ppup003910.1, Ppup008680.1, Ppup010280.1, Ppup022170.1, Ppup027280.1, Ppup027690.1, Ppup039090.1, Ppup046770.1, Ppup048860.1, Ppup052710.1, Ppup057310.1, Ppup059940.1, Ppup064250.1, Ppup071370.1, Ppup074880.1, Ppup084230.1, Ppup084450.1, Ppup086470.1, Ppup090820.1, Ppup101280.1, Ppup103270.1, Ppup109360.1, Ppup112100.1, Ppup112480.1, Ppup116890.1, Ppup120140.1, Ppup122670.1, Ppup126170.1, Ppup133…
GO:0045184	BP	e	establishment of protein localization	205/2424	672/10157	4.48855e-05	4	205	0.00368919	Ppup003030.1, Ppup003230.1, Ppup003780.1, Ppup004180.1, Ppup004330.1, Ppup004540.1, Ppup005830.1, Ppup006390.1, Ppup006410.1, Ppup006490.1, Ppup006550.1, Ppup006730.1, Ppup006950.1, Ppup007170.1, Ppup008770.1, Ppup009830.1, Ppup011180.1, Ppup011300.1, Ppup012830.1, Ppup013010.1, Ppup015740.1, Ppup017870.1, Ppup018840.1, Ppup019990.1, Ppup020270.1, Ppup020290.1, Ppup020500.1, Ppup020630.1, Ppup021…
GO:0006639	BP	e	acylglycerol metabolic process	18/2424	31/10157	4.6068e-05	6	18	0.00375874	Ppup004450.1, Ppup011620.1, Ppup025880.1, Ppup033140.1, Ppup052290.1, Ppup062600.1, Ppup062660.1, Ppup092170.1, Ppup101160.1, Ppup106350.1, Ppup113500.1, Ppup130100.1, Ppup136110.1, Ppup137390.1, Ppup140980.1, Ppup153110.1, Ppup153590.1, Ppup162420.1
GO:1903507	BP	e	negative regulation of nucleic acid-templated transcription	132/2424	405/10157	4.90146e-05	9	132	0.00392712	Ppup003100.1, Ppup003620.1, Ppup006360.1, Ppup006660.1, Ppup008760.1, Ppup011100.1, Ppup011200.1, Ppup011560.1, Ppup013200.1, Ppup017950.1, Ppup018270.1, Ppup018600.1, Ppup018630.1, Ppup018690.1, Ppup018870.1, Ppup018890.1, Ppup019000.1, Ppup019150.1, Ppup019950.1, Ppup022280.1, Ppup024160.1, Ppup024730.1, Ppup025760.1, Ppup026550.1, Ppup026960.1, Ppup027520.1, Ppup033160.1, Ppup033420.1, Ppup035…
GO:1902679	BP	e	negative regulation of RNA biosynthetic process	132/2424	405/10157	4.90146e-05	8	132	0.00392712	Ppup003100.1, Ppup003620.1, Ppup006360.1, Ppup006660.1, Ppup008760.1, Ppup011100.1, Ppup011200.1, Ppup011560.1, Ppup013200.1, Ppup017950.1, Ppup018270.1, Ppup018600.1, Ppup018630.1, Ppup018690.1, Ppup018870.1, Ppup018890.1, Ppup019000.1, Ppup019150.1, Ppup019950.1, Ppup022280.1, Ppup024160.1, Ppup024730.1, Ppup025760.1, Ppup026550.1, Ppup026960.1, Ppup027520.1, Ppup033160.1, Ppup033420.1, Ppup035…
GO:0006811	BP	e	ion transport	157/2424	496/10157	4.91856e-05	4	157	0.00392712	Ppup002250.1, Ppup003040.1, Ppup004080.1, Ppup004420.1, Ppup005470.1, Ppup006500.1, Ppup007130.1, Ppup007780.1, Ppup010230.1, Ppup011220.1, Ppup011380.1, Ppup017880.1, Ppup018310.1, Ppup019440.1, Ppup020100.1, Ppup020860.1, Ppup021490.1, Ppup024330.1, Ppup025130.1, Ppup025890.1, Ppup027280.1, Ppup028060.1, Ppup029430.1, Ppup030030.1, Ppup031080.1, Ppup031510.1, Ppup031630.1, Ppup031750.1, Ppup035…
GO:2001252	BP	e	positive regulation of chromosome organization	34/2424	75/10157	5.31392e-05	7	34	0.0042127	Ppup016230.1, Ppup018270.1, Ppup019810.1, Ppup035070.1, Ppup035890.1, Ppup037880.1, Ppup039960.1, Ppup042410.1, Ppup043580.1, Ppup049720.1, Ppup055320.1, Ppup058840.1, Ppup061660.1, Ppup075380.1, Ppup080180.1, Ppup082130.1, Ppup091190.1, Ppup095620.1, Ppup101230.1, Ppup103700.1, Ppup108340.1, Ppup122630.1, Ppup123820.1, Ppup126130.1, Ppup130950.1, Ppup133560.1, Ppup140050.1, Ppup143120.1, Ppup143…
GO:0000122	BP	e	negative regulation of transcription by RNA polymerase II	89/2424	255/10157	5.46921e-05	11	89	0.00427805	Ppup003100.1, Ppup006360.1, Ppup011100.1, Ppup011200.1, Ppup013200.1, Ppup017950.1, Ppup018270.1, Ppup018690.1, Ppup019000.1, Ppup019150.1, Ppup022280.1, Ppup024160.1, Ppup024730.1, Ppup025760.1, Ppup027520.1, Ppup033160.1, Ppup033420.1, Ppup035800.1, Ppup035840.1, Ppup036470.1, Ppup037010.1, Ppup037560.1, Ppup037880.1, Ppup039050.1, Ppup039090.1, Ppup046570.1, Ppup048770.1, Ppup049720.1, Ppup052…
GO:0032269	BP	e	negative regulation of cellular protein metabolic process	93/2424	269/10157	6.11374e-05	7	93	0.00474579	Ppup001710.1, Ppup003740.1, Ppup006720.1, Ppup010070.1, Ppup010390.1, Ppup011260.1, Ppup012830.1, Ppup014250.1, Ppup020310.1, Ppup021150.1, Ppup025910.1, Ppup026360.1, Ppup026790.1, Ppup027280.1, Ppup027520.1, Ppup035890.1, Ppup037560.1, Ppup038210.1, Ppup040010.1, Ppup041140.1, Ppup043500.1, Ppup046570.1, Ppup049720.1, Ppup050410.1, Ppup053660.1, Ppup053970.1, Ppup054230.1, Ppup057750.1, Ppup057…
GO:0032970	BP	e	regulation of actin filament-based process	49/2424	122/10157	6.2038e-05	4	49	0.00478249	Ppup003230.1, Ppup005490.1, Ppup006810.1, Ppup009190.1, Ppup018600.1, Ppup021210.1, Ppup022170.1, Ppup027280.1, Ppup028810.1, Ppup036980.1, Ppup042150.1, Ppup043440.1, Ppup044250.1, Ppup057310.1, Ppup064390.1, Ppup071370.1, Ppup075230.1, Ppup084230.1, Ppup084280.1, Ppup084510.1, Ppup086470.1, Ppup086990.1, Ppup090820.1, Ppup094070.1, Ppup098040.1, Ppup101280.1, Ppup103270.1, Ppup109160.1, Ppup110…
GO:0045892	BP	e	negative regulation of transcription, DNA-templated	131/2424	404/10157	6.326e-05	10	131	0.00482325	Ppup003100.1, Ppup003620.1, Ppup006360.1, Ppup006660.1, Ppup008760.1, Ppup011100.1, Ppup011200.1, Ppup011560.1, Ppup013200.1, Ppup017950.1, Ppup018270.1, Ppup018600.1, Ppup018630.1, Ppup018690.1, Ppup018870.1, Ppup018890.1, Ppup019000.1, Ppup019150.1, Ppup019950.1, Ppup022280.1, Ppup024160.1, Ppup024730.1, Ppup025760.1, Ppup026550.1, Ppup026960.1, Ppup027520.1, Ppup033160.1, Ppup033420.1, Ppup035…
GO:0044267	BP	e	cellular protein metabolic process	406/2424	1446/10157	6.34298e-05	5	406	0.00482325	Ppup001710.1, Ppup001720.1, Ppup001730.1, Ppup001800.1, Ppup001870.1, Ppup002240.1, Ppup002450.1, Ppup002900.1, Ppup003120.1, Ppup003610.1, Ppup003620.1, Ppup004240.1, Ppup004410.1, Ppup004570.1, Ppup005260.1, Ppup005320.1, Ppup005470.1, Ppup005780.1, Ppup006830.1, Ppup008630.1, Ppup008730.1, Ppup008760.1, Ppup008980.1, Ppup009730.1, Ppup010900.1, Ppup011260.1, Ppup011800.1, Ppup012810.1, Ppup012…
GO:0017148	BP	e	negative regulation of translation	28/2424	58/10157	6.62985e-05	8	28	0.00497372	Ppup003740.1, Ppup020310.1, Ppup021150.1, Ppup026790.1, Ppup027280.1, Ppup027520.1, Ppup040010.1, Ppup043500.1, Ppup050410.1, Ppup057750.1, Ppup064000.1, Ppup074180.1, Ppup076900.1, Ppup084660.1, Ppup085930.1, Ppup086780.1, Ppup095850.1, Ppup109030.1, Ppup122670.1, Ppup123910.1, Ppup139800.1, Ppup141700.1, Ppup142660.1, Ppup144760.1, Ppup162290.1, Ppup167300.1, Ppup168280.1, Ppup173830.1
GO:0007626	BP	e	locomotory behavior	45/2424	110/10157	6.77363e-05	2	45	0.00504771	Ppup001870.1, Ppup005470.1, Ppup010280.1, Ppup018590.1, Ppup018600.1, Ppup024570.1, Ppup027280.1, Ppup037560.1, Ppup040750.1, Ppup040930.1, Ppup044730.1, Ppup045860.1, Ppup055840.1, Ppup058840.1, Ppup059350.1, Ppup059820.1, Ppup062660.1, Ppup064000.1, Ppup074880.1, Ppup075690.1, Ppup086960.1, Ppup094290.1, Ppup096260.1, Ppup098040.1, Ppup104550.1, Ppup109360.1, Ppup113230.1, Ppup120090.1, Ppup120…
GO:1901575	BP	e	organic substance catabolic process	294/2424	1013/10157	7.26075e-05	3	294	0.00537488	Ppup001710.1, Ppup001760.1, Ppup001870.1, Ppup002240.1, Ppup002290.1, Ppup002450.1, Ppup002530.1, Ppup002680.1, Ppup002780.1, Ppup002900.1, Ppup003610.1, Ppup004410.1, Ppup004570.1, Ppup005210.1, Ppup005460.1, Ppup005470.1, Ppup006440.1, Ppup006490.1, Ppup006830.1, Ppup008760.1, Ppup009900.1, Ppup011120.1, Ppup012830.1, Ppup014330.1, Ppup015760.1, Ppup017930.1, Ppup018680.1, Ppup018870.1, Ppup019…
GO:0009896	BP	e	positive regulation of catabolic process	65/2424	175/10157	7.3154e-05	5	65	0.00537971	Ppup005320.1, Ppup011120.1, Ppup020080.1, Ppup020310.1, Ppup021300.1, Ppup025880.1, Ppup025910.1, Ppup026790.1, Ppup027280.1, Ppup027520.1, Ppup029460.1, Ppup030870.1, Ppup037330.1, Ppup039790.1, Ppup040010.1, Ppup040060.1, Ppup049010.1, Ppup049570.1, Ppup050100.1, Ppup050680.1, Ppup050770.1, Ppup052760.1, Ppup057460.1, Ppup057490.1, Ppup057970.1, Ppup061620.1, Ppup063940.1, Ppup064000.1, Ppup075…
GO:0046839	BP	e	phospholipid dephosphorylation	10/2424	13/10157	8.15052e-05	6	10	0.00586558	Ppup006440.1, Ppup010210.1, Ppup020690.1, Ppup028400.1, Ppup033260.1, Ppup094070.1, Ppup134680.1, Ppup139130.1, Ppup145920.1, Ppup163850.1
GO:0090630	BP	e	activation of GTPase activity	18/2424	32/10157	8.18898e-05	7	18	0.00586558	Ppup011300.1, Ppup020270.1, Ppup027280.1, Ppup027780.1, Ppup029350.1, Ppup036980.1, Ppup052710.1, Ppup059100.1, Ppup074730.1, Ppup086170.1, Ppup114050.1, Ppup115270.1, Ppup144610.1, Ppup145510.1, Ppup145520.1, Ppup147010.1, Ppup162720.1, Ppup169780.1
GO:0006638	BP	e	neutral lipid metabolic process	18/2424	32/10157	8.18898e-05	5	18	0.00586558	Ppup004450.1, Ppup011620.1, Ppup025880.1, Ppup033140.1, Ppup052290.1, Ppup062600.1, Ppup062660.1, Ppup092170.1, Ppup101160.1, Ppup106350.1, Ppup113500.1, Ppup130100.1, Ppup136110.1, Ppup137390.1, Ppup140980.1, Ppup153110.1, Ppup153590.1, Ppup162420.1
GO:0051174	BP	e	regulation of phosphorus metabolic process	138/2424	431/10157	8.23847e-05	5	138	0.00586558	Ppup001800.1, Ppup003100.1, Ppup004550.1, Ppup005280.1, Ppup005320.1, Ppup006490.1, Ppup006720.1, Ppup010070.1, Ppup013130.1, Ppup014250.1, Ppup017930.1, Ppup019820.1, Ppup020690.1, Ppup021150.1, Ppup022170.1, Ppup024570.1, Ppup026440.1, Ppup027280.1, Ppup027410.1, Ppup027520.1, Ppup027810.1, Ppup028400.1, Ppup028810.1, Ppup029910.1, Ppup030870.1, Ppup035940.1, Ppup036080.1, Ppup036980.1, Ppup037…
GO:0019220	BP	e	regulation of phosphate metabolic process	138/2424	431/10157	8.23847e-05	6	138	0.00586558	Ppup001800.1, Ppup003100.1, Ppup004550.1, Ppup005280.1, Ppup005320.1, Ppup006490.1, Ppup006720.1, Ppup010070.1, Ppup013130.1, Ppup014250.1, Ppup017930.1, Ppup019820.1, Ppup020690.1, Ppup021150.1, Ppup022170.1, Ppup024570.1, Ppup026440.1, Ppup027280.1, Ppup027410.1, Ppup027520.1, Ppup027810.1, Ppup028400.1, Ppup028810.1, Ppup029910.1, Ppup030870.1, Ppup035940.1, Ppup036080.1, Ppup036980.1, Ppup037…
GO:0043085	BP	e	positive regulation of catalytic activity	90/2424	260/10157	8.48854e-05	4	90	0.00600538	Ppup006810.1, Ppup007260.1, Ppup011300.1, Ppup013130.1, Ppup013200.1, Ppup015730.1, Ppup018680.1, Ppup020270.1, Ppup022170.1, Ppup027050.1, Ppup027280.1, Ppup027780.1, Ppup027810.1, Ppup028810.1, Ppup029350.1, Ppup030870.1, Ppup035940.1, Ppup036080.1, Ppup036980.1, Ppup040150.1, Ppup042910.1, Ppup043550.1, Ppup044130.1, Ppup044250.1, Ppup047250.1, Ppup049760.1, Ppup052710.1, Ppup053660.1, Ppup057…
GO:0032270	BP	e	positive regulation of cellular protein metabolic process	139/2424	434/10157	8.583e-05	7	139	0.00603401	Ppup004410.1, Ppup004550.1, Ppup005280.1, Ppup005320.1, Ppup006490.1, Ppup006720.1, Ppup008760.1, Ppup013130.1, Ppup013200.1, Ppup016860.1, Ppup017930.1, Ppup018680.1, Ppup019810.1, Ppup020080.1, Ppup022170.1, Ppup024570.1, Ppup026440.1, Ppup026960.1, Ppup027410.1, Ppup027810.1, Ppup028810.1, Ppup029460.1, Ppup030870.1, Ppup035070.1, Ppup035890.1, Ppup035940.1, Ppup036080.1, Ppup036980.1, Ppup037…
GO:0050790	BP	e	regulation of catalytic activity	147/2424	463/10157	8.87972e-05	3	147	0.0062036	Ppup003100.1, Ppup003170.1, Ppup005320.1, Ppup006720.1, Ppup006810.1, Ppup007260.1, Ppup010390.1, Ppup011300.1, Ppup012830.1, Ppup013130.1, Ppup013200.1, Ppup015730.1, Ppup018680.1, Ppup018860.1, Ppup019820.1, Ppup020270.1, Ppup022170.1, Ppup022290.1, Ppup026360.1, Ppup027050.1, Ppup027280.1, Ppup027780.1, Ppup027810.1, Ppup028810.1, Ppup029350.1, Ppup029910.1, Ppup030870.1, Ppup035940.1, Ppup036…
GO:0006357	BP	e	regulation of transcription by RNA polymerase II	246/2424	833/10157	9.26884e-05	10	246	0.00643522	Ppup001870.1, Ppup003100.1, Ppup004410.1, Ppup004550.1, Ppup006360.1, Ppup007710.1, Ppup008020.1, Ppup008030.1, Ppup008570.1, Ppup010940.1, Ppup011100.1, Ppup011200.1, Ppup013200.1, Ppup013940.1, Ppup014100.1, Ppup014360.1, Ppup015790.1, Ppup017950.1, Ppup018270.1, Ppup018550.1, Ppup018590.1, Ppup018630.1, Ppup018690.1, Ppup019000.1, Ppup019100.1, Ppup019150.1, Ppup019160.1, Ppup019460.1, Ppup019…
GO:0110053	BP	e	regulation of actin filament organization	37/2424	86/10157	0.000101842	8	37	0.00702707	Ppup005490.1, Ppup006810.1, Ppup009190.1, Ppup018600.1, Ppup021210.1, Ppup022170.1, Ppup027280.1, Ppup036980.1, Ppup042150.1, Ppup043440.1, Ppup044250.1, Ppup057310.1, Ppup064390.1, Ppup071370.1, Ppup075230.1, Ppup084280.1, Ppup084510.1, Ppup086470.1, Ppup086990.1, Ppup090820.1, Ppup094070.1, Ppup098040.1, Ppup101280.1, Ppup109160.1, Ppup114260.1, Ppup115500.1, Ppup122880.1, Ppup126790.1, Ppup134…
GO:0051494	BP	e	negative regulation of cytoskeleton organization	24/2424	48/10157	0.000105489	7	24	0.0072174	Ppup005490.1, Ppup009190.1, Ppup021210.1, Ppup025690.1, Ppup043440.1, Ppup043580.1, Ppup064390.1, Ppup077190.1, Ppup080260.1, Ppup084280.1, Ppup084510.1, Ppup087280.1, Ppup094070.1, Ppup098040.1, Ppup106040.1, Ppup106190.1, Ppup114260.1, Ppup122880.1, Ppup126790.1, Ppup134010.1, Ppup142060.1, Ppup144180.1, Ppup150900.1, Ppup165030.1
GO:0044248	BP	e	cellular catabolic process	277/2424	953/10157	0.000105891	3	277	0.0072174	Ppup001710.1, Ppup001760.1, Ppup001870.1, Ppup002240.1, Ppup002290.1, Ppup002450.1, Ppup002780.1, Ppup002900.1, Ppup003610.1, Ppup004410.1, Ppup004570.1, Ppup005210.1, Ppup005460.1, Ppup005470.1, Ppup006490.1, Ppup008760.1, Ppup011120.1, Ppup011300.1, Ppup012830.1, Ppup014330.1, Ppup015760.1, Ppup018680.1, Ppup018860.1, Ppup018870.1, Ppup019010.1, Ppup019030.1, Ppup019430.1, Ppup019820.1, Ppup020…
GO:0045934	BP	e	negative regulation of nucleobase-containing compound metabolic process	153/2424	488/10157	0.000107859	6	153	0.00729131	Ppup003100.1, Ppup003620.1, Ppup005470.1, Ppup006360.1, Ppup006660.1, Ppup008760.1, Ppup011100.1, Ppup011200.1, Ppup011560.1, Ppup013200.1, Ppup015890.1, Ppup017950.1, Ppup018270.1, Ppup018600.1, Ppup018630.1, Ppup018690.1, Ppup018870.1, Ppup018890.1, Ppup019000.1, Ppup019150.1, Ppup019950.1, Ppup020310.1, Ppup022280.1, Ppup023730.1, Ppup024160.1, Ppup024730.1, Ppup025760.1, Ppup026550.1, Ppup026…
GO:0051248	BP	e	negative regulation of protein metabolic process	98/2424	289/10157	0.000108304	6	98	0.00729131	Ppup001710.1, Ppup003740.1, Ppup005320.1, Ppup006720.1, Ppup010070.1, Ppup010390.1, Ppup011260.1, Ppup012830.1, Ppup014250.1, Ppup019150.1, Ppup020310.1, Ppup021150.1, Ppup025910.1, Ppup026360.1, Ppup026630.1, Ppup026790.1, Ppup027280.1, Ppup027520.1, Ppup035890.1, Ppup037560.1, Ppup038210.1, Ppup040010.1, Ppup041140.1, Ppup043500.1, Ppup046570.1, Ppup049720.1, Ppup050410.1, Ppup053660.1, Ppup053…
GO:0032940	BP	e	secretion by cell	75/2424	211/10157	0.000114506	5	75	0.00761876	Ppup001870.1, Ppup004180.1, Ppup005830.1, Ppup006950.1, Ppup007130.1, Ppup008830.1, Ppup010330.1, Ppup017870.1, Ppup018240.1, Ppup027680.1, Ppup039720.1, Ppup040260.1, Ppup043610.1, Ppup048800.1, Ppup048860.1, Ppup050340.1, Ppup052220.1, Ppup052260.1, Ppup053510.1, Ppup054430.1, Ppup058040.1, Ppup063500.1, Ppup075410.1, Ppup076820.1, Ppup081800.1, Ppup082260.1, Ppup082790.1, Ppup084510.1, Ppup085…
GO:0043484	BP	e	regulation of RNA splicing	35/2424	81/10157	0.000116328	7	35	0.00769419	Ppup001810.1, Ppup009680.1, Ppup010940.1, Ppup014110.1, Ppup024270.1, Ppup024750.1, Ppup027070.1, Ppup035260.1, Ppup037010.1, Ppup046960.1, Ppup059210.1, Ppup075680.1, Ppup075970.1, Ppup077280.1, Ppup077510.1, Ppup085930.1, Ppup085980.1, Ppup092260.1, Ppup095370.1, Ppup096090.1, Ppup096760.1, Ppup104050.1, Ppup104060.1, Ppup112260.1, Ppup115130.1, Ppup115630.1, Ppup123010.1, Ppup123910.1, Ppup130…
GO:0051056	BP	e	regulation of small GTPase mediated signal transduction	39/2424	93/10157	0.000118256	7	39	0.0077757	Ppup003170.1, Ppup005490.1, Ppup006810.1, Ppup019990.1, Ppup028100.1, Ppup031560.1, Ppup036980.1, Ppup037540.1, Ppup042150.1, Ppup042910.1, Ppup044340.1, Ppup048090.1, Ppup048770.1, Ppup049450.1, Ppup052710.1, Ppup057830.1, Ppup060010.1, Ppup065980.1, Ppup074730.1, Ppup075890.1, Ppup084510.1, Ppup086530.1, Ppup087220.1, Ppup093070.1, Ppup095200.1, Ppup095470.1, Ppup098070.1, Ppup111590.1, Ppup114…
GO:0009987	BP	e	cellular process	1869/2424	7530/10157	0.000128534	1	1869	0.00840204	Ppup000250.1, Ppup001710.1, Ppup001720.1, Ppup001730.1, Ppup001740.1, Ppup001760.1, Ppup001800.1, Ppup001810.1, Ppup001870.1, Ppup002240.1, Ppup002250.1, Ppup002280.1, Ppup002290.1, Ppup002450.1, Ppup002480.1, Ppup002530.1, Ppup002680.1, Ppup002780.1, Ppup002790.1, Ppup002870.1, Ppup002900.1, Ppup003030.1, Ppup003070.1, Ppup003100.1, Ppup003120.1, Ppup003130.1, Ppup003170.1, Ppup003230.1, Ppup003…
GO:0051049	BP	e	regulation of transport	169/2424	549/10157	0.000135867	4	169	0.00882979	Ppup002250.1, Ppup002780.1, Ppup003070.1, Ppup003230.1, Ppup004150.1, Ppup004180.1, Ppup005470.1, Ppup005940.1, Ppup006490.1, Ppup007130.1, Ppup007260.1, Ppup008830.1, Ppup009830.1, Ppup010280.1, Ppup010330.1, Ppup011220.1, Ppup011470.1, Ppup013930.1, Ppup014360.1, Ppup017930.1, Ppup019200.1, Ppup020290.1, Ppup020500.1, Ppup020690.1, Ppup020860.1, Ppup021570.1, Ppup022290.1, Ppup024510.1, Ppup025…
GO:0006513	BP	e	protein monoubiquitination	18/2424	33/10157	0.00014015	10	18	0.00905548	Ppup002900.1, Ppup013200.1, Ppup025910.1, Ppup039050.1, Ppup039790.1, Ppup046570.1, Ppup059220.1, Ppup059860.1, Ppup064640.1, Ppup097330.1, Ppup109850.1, Ppup126030.1, Ppup126130.1, Ppup128890.1, Ppup133560.1, Ppup146820.1, Ppup161000.1, Ppup173170.1
GO:0007611	BP	e	learning or memory	45/2424	113/10157	0.000141822	5	45	0.00911085	Ppup004150.1, Ppup006360.1, Ppup006440.1, Ppup009470.1, Ppup017930.1, Ppup018140.1, Ppup025100.1, Ppup027690.1, Ppup038960.1, Ppup043580.1, Ppup045860.1, Ppup050410.1, Ppup055840.1, Ppup058840.1, Ppup064850.1, Ppup064880.1, Ppup071370.1, Ppup075230.1, Ppup082260.1, Ppup086620.1, Ppup086990.1, Ppup091240.1, Ppup095850.1, Ppup096260.1, Ppup098040.1, Ppup101280.1, Ppup123780.1, Ppup126170.1, Ppup127…
GO:0015748	BP	e	organophosphate ester transport	20/2424	38/10157	0.000147658	5	20	0.00943155	Ppup030030.1, Ppup043200.1, Ppup046230.1, Ppup047250.1, Ppup053500.1, Ppup058400.1, Ppup060140.1, Ppup064670.1, Ppup075760.1, Ppup082260.1, Ppup094530.1, Ppup104600.1, Ppup109420.1, Ppup109430.1, Ppup132510.1, Ppup134340.1, Ppup144560.1, Ppup162270.1, Ppup166000.1, Ppup166680.1
GO:0140352	BP	e	export from cell	77/2424	220/10157	0.000160776	4	77	0.0102111	Ppup001870.1, Ppup004180.1, Ppup005830.1, Ppup006950.1, Ppup007130.1, Ppup008830.1, Ppup010330.1, Ppup017870.1, Ppup018240.1, Ppup027680.1, Ppup039720.1, Ppup040260.1, Ppup043610.1, Ppup048800.1, Ppup048860.1, Ppup050340.1, Ppup052220.1, Ppup052260.1, Ppup053510.1, Ppup054430.1, Ppup058040.1, Ppup063500.1, Ppup075410.1, Ppup076820.1, Ppup081800.1, Ppup082260.1, Ppup082790.1, Ppup084510.1, Ppup085…
GO:0016071	BP	e	mRNA metabolic process	133/2424	418/10157	0.000168316	7	133	0.0106296	Ppup001810.1, Ppup003970.1, Ppup007300.1, Ppup009470.1, Ppup009660.1, Ppup009680.1, Ppup010940.1, Ppup014110.1, Ppup014330.1, Ppup016840.1, Ppup016860.1, Ppup016900.1, Ppup017570.1, Ppup023010.1, Ppup023850.1, Ppup024160.1, Ppup024270.1, Ppup025790.1, Ppup026630.1, Ppup026790.1, Ppup026830.1, Ppup027020.1, Ppup027070.1, Ppup027520.1, Ppup027950.1, Ppup031100.1, Ppup032990.1, Ppup035260.1, Ppup037…
GO:0043547	BP	e	positive regulation of GTPase activity	29/2424	64/10157	0.000170332	6	29	0.0106441	Ppup006810.1, Ppup007260.1, Ppup011300.1, Ppup020270.1, Ppup027280.1, Ppup027780.1, Ppup029350.1, Ppup036980.1, Ppup042910.1, Ppup049760.1, Ppup052710.1, Ppup057830.1, Ppup059100.1, Ppup065980.1, Ppup074730.1, Ppup084510.1, Ppup086170.1, Ppup093070.1, Ppup098430.1, Ppup114050.1, Ppup115270.1, Ppup144610.1, Ppup145510.1, Ppup145520.1, Ppup145860.1, Ppup147010.1, Ppup156210.1, Ppup162720.1, Ppup169…
GO:0010506	BP	e	regulation of autophagy	44/2424	110/10157	0.000170451	6	44	0.0106441	Ppup005470.1, Ppup011260.1, Ppup011300.1, Ppup021300.1, Ppup025910.1, Ppup026550.1, Ppup027280.1, Ppup028280.1, Ppup028400.1, Ppup029350.1, Ppup030870.1, Ppup043150.1, Ppup046770.1, Ppup049570.1, Ppup051070.1, Ppup057460.1, Ppup058670.1, Ppup075680.1, Ppup076900.1, Ppup077340.1, Ppup083070.1, Ppup095370.1, Ppup101240.1, Ppup106330.1, Ppup110950.1, Ppup116340.1, Ppup116700.1, Ppup122670.1, Ppup122…
GO:0050807	BP	e	regulation of synapse organization	42/2424	104/10157	0.000178911	5	42	0.0111104	Ppup004410.1, Ppup008680.1, Ppup009190.1, Ppup010280.1, Ppup011620.1, Ppup018680.1, Ppup022170.1, Ppup027690.1, Ppup039090.1, Ppup042410.1, Ppup046770.1, Ppup048860.1, Ppup050970.1, Ppup052710.1, Ppup059940.1, Ppup064250.1, Ppup071370.1, Ppup074880.1, Ppup075890.1, Ppup084450.1, Ppup086270.1, Ppup086420.1, Ppup090820.1, Ppup098040.1, Ppup101280.1, Ppup103270.1, Ppup103510.1, Ppup109360.1, Ppup112…
GO:0007029	BP	e	endoplasmic reticulum organization	11/2424	16/10157	0.000180531	5	11	0.011149	Ppup006390.1, Ppup021890.1, Ppup075690.1, Ppup090610.1, Ppup092790.1, Ppup096440.1, Ppup123420.1, Ppup140100.1, Ppup145250.1, Ppup145260.1, Ppup167630.1
GO:0048856	BP	e	anatomical structure development	436/2424	1581/10157	0.000194962	2	436	0.0119741	Ppup001800.1, Ppup001870.1, Ppup002910.1, Ppup003170.1, Ppup003740.1, Ppup003910.1, Ppup004180.1, Ppup004410.1, Ppup005460.1, Ppup005470.1, Ppup005600.1, Ppup006210.1, Ppup006350.1, Ppup006360.1, Ppup006410.1, Ppup006440.1, Ppup006500.1, Ppup006660.1, Ppup006730.1, Ppup006950.1, Ppup007260.1, Ppup007690.1, Ppup008030.1, Ppup008570.1, Ppup009190.1, Ppup009340.1, Ppup009820.1, Ppup010230.1, Ppup011…
GO:0032271	BP	e	regulation of protein polymerization	33/2424	76/10157	0.000197865	6	33	0.012086	Ppup005490.1, Ppup006810.1, Ppup009190.1, Ppup018600.1, Ppup021210.1, Ppup022170.1, Ppup036980.1, Ppup042150.1, Ppup044250.1, Ppup064390.1, Ppup075230.1, Ppup077190.1, Ppup080260.1, Ppup084280.1, Ppup084510.1, Ppup086470.1, Ppup086510.1, Ppup086990.1, Ppup090820.1, Ppup106040.1, Ppup109160.1, Ppup114260.1, Ppup115500.1, Ppup122880.1, Ppup123810.1, Ppup126790.1, Ppup135110.1, Ppup140100.1, Ppup142…
GO:0034249	BP	e	negative regulation of cellular amide metabolic process	28/2424	61/10157	0.000205953	6	28	0.0125116	Ppup003740.1, Ppup020310.1, Ppup021150.1, Ppup026790.1, Ppup027280.1, Ppup027520.1, Ppup040010.1, Ppup043500.1, Ppup050410.1, Ppup057750.1, Ppup064000.1, Ppup074180.1, Ppup076900.1, Ppup084660.1, Ppup085930.1, Ppup086780.1, Ppup095850.1, Ppup109030.1, Ppup122670.1, Ppup123910.1, Ppup139800.1, Ppup141700.1, Ppup142660.1, Ppup144760.1, Ppup162290.1, Ppup167300.1, Ppup168280.1, Ppup173830.1
GO:0046887	BP	e	positive regulation of hormone secretion	15/2424	26/10157	0.000221052	8	15	0.0133563	Ppup005940.1, Ppup010280.1, Ppup011470.1, Ppup017930.1, Ppup037880.1, Ppup062600.1, Ppup069310.1, Ppup075960.1, Ppup086470.1, Ppup108180.1, Ppup109260.1, Ppup137390.1, Ppup138910.1, Ppup165290.1, Ppup172340.1
GO:0072583	BP	e	clathrin-dependent endocytosis	13/2424	21/10157	0.000222595	7	13	0.0133773	Ppup003030.1, Ppup004540.1, Ppup006040.1, Ppup006490.1, Ppup012590.1, Ppup063370.1, Ppup076850.1, Ppup092470.1, Ppup094800.1, Ppup109160.1, Ppup113230.1, Ppup135110.1, Ppup145980.1
GO:0045017	BP	e	glycerolipid biosynthetic process	31/2424	71/10157	0.000225196	6	31	0.0134612	Ppup004450.1, Ppup006440.1, Ppup017930.1, Ppup020690.1, Ppup027260.1, Ppup028400.1, Ppup030030.1, Ppup037910.1, Ppup040660.1, Ppup040690.1, Ppup044790.1, Ppup062660.1, Ppup085530.1, Ppup092170.1, Ppup106250.1, Ppup106260.1, Ppup106700.1, Ppup115200.1, Ppup123980.1, Ppup126400.1, Ppup131820.1, Ppup134680.1, Ppup135100.1, Ppup137390.1, Ppup141050.1, Ppup147010.1, Ppup152280.1, Ppup153110.1, Ppup162…
GO:0006836	BP	e	neurotransmitter transport	39/2424	95/10157	0.000228865	4	39	0.0136077	Ppup004180.1, Ppup004420.1, Ppup005830.1, Ppup006440.1, Ppup006950.1, Ppup007130.1, Ppup010920.1, Ppup028600.1, Ppup031630.1, Ppup048860.1, Ppup052260.1, Ppup052820.1, Ppup054430.1, Ppup073370.1, Ppup077110.1, Ppup085610.1, Ppup085760.1, Ppup086080.1, Ppup090730.1, Ppup096580.1, Ppup099520.1, Ppup106580.1, Ppup106640.1, Ppup107790.1, Ppup108120.1, Ppup113230.1, Ppup114130.1, Ppup116570.1, Ppup117…
GO:0030832	BP	e	regulation of actin filament length	30/2424	67/10157	0.000235081	8	30	0.0138302	Ppup005490.1, Ppup006810.1, Ppup009190.1, Ppup018600.1, Ppup021210.1, Ppup022170.1, Ppup036980.1, Ppup042150.1, Ppup043440.1, Ppup044250.1, Ppup064390.1, Ppup071370.1, Ppup075230.1, Ppup084280.1, Ppup084510.1, Ppup086990.1, Ppup090820.1, Ppup101280.1, Ppup109160.1, Ppup114260.1, Ppup115500.1, Ppup122880.1, Ppup126790.1, Ppup135110.1, Ppup142060.1, Ppup143960.1, Ppup145020.1, Ppup150900.1, Ppup165…
GO:0008064	BP	e	regulation of actin polymerization or depolymerization	30/2424	67/10157	0.000235081	9	30	0.0138302	Ppup005490.1, Ppup006810.1, Ppup009190.1, Ppup018600.1, Ppup021210.1, Ppup022170.1, Ppup036980.1, Ppup042150.1, Ppup043440.1, Ppup044250.1, Ppup064390.1, Ppup071370.1, Ppup075230.1, Ppup084280.1, Ppup084510.1, Ppup086990.1, Ppup090820.1, Ppup101280.1, Ppup109160.1, Ppup114260.1, Ppup115500.1, Ppup122880.1, Ppup126790.1, Ppup135110.1, Ppup142060.1, Ppup143960.1, Ppup145020.1, Ppup150900.1, Ppup165…
GO:0010033	BP	e	response to organic substance	173/2424	570/10157	0.000264673	3	173	0.0154896	Ppup002480.1, Ppup002900.1, Ppup003740.1, Ppup003910.1, Ppup004410.1, Ppup005940.1, Ppup006210.1, Ppup006830.1, Ppup008760.1, Ppup013130.1, Ppup017950.1, Ppup018270.1, Ppup018690.1, Ppup018870.1, Ppup019150.1, Ppup019460.1, Ppup019930.1, Ppup020080.1, Ppup021070.1, Ppup021090.1, Ppup022030.1, Ppup022310.1, Ppup024220.1, Ppup025100.1, Ppup025880.1, Ppup026790.1, Ppup027280.1, Ppup031510.1, Ppup031…
GO:0003333	BP	e	amino acid transmembrane transport	16/2424	29/10157	0.000276317	9	16	0.0160868	Ppup004420.1, Ppup028060.1, Ppup031080.1, Ppup031630.1, Ppup077110.1, Ppup085610.1, Ppup086080.1, Ppup106580.1, Ppup127030.1, Ppup130380.1, Ppup138970.1, Ppup141890.1, Ppup143690.1, Ppup153300.1, Ppup154630.1, Ppup168300.1
GO:0050890	BP	e	cognition	46/2424	118/10157	0.000284999	4	46	0.0165063	Ppup004150.1, Ppup006360.1, Ppup006440.1, Ppup009470.1, Ppup017930.1, Ppup018140.1, Ppup025100.1, Ppup027690.1, Ppup038960.1, Ppup043580.1, Ppup045860.1, Ppup050410.1, Ppup055840.1, Ppup058840.1, Ppup064850.1, Ppup064880.1, Ppup071370.1, Ppup075230.1, Ppup082260.1, Ppup086620.1, Ppup086990.1, Ppup091240.1, Ppup095850.1, Ppup096260.1, Ppup098040.1, Ppup101280.1, Ppup123780.1, Ppup126170.1, Ppup127…
GO:0043984	BP	e	histone H4-K16 acetylation	8/2424	10/10157	0.000292009	13	8	0.0166535	Ppup008730.1, Ppup018690.1, Ppup021480.1, Ppup043600.1, Ppup050210.1, Ppup094820.1, Ppup174340.1, Ppup176270.1
GO:0031937	BP	e	positive regulation of chromatin silencing	8/2424	10/10157	0.000292009	11	8	0.0166535	Ppup016230.1, Ppup055320.1, Ppup075380.1, Ppup080180.1, Ppup091190.1, Ppup143120.1, Ppup145760.1, Ppup154760.1
GO:0046856	BP	e	phosphatidylinositol dephosphorylation	8/2424	10/10157	0.000292009	8	8	0.0166535	Ppup006440.1, Ppup010210.1, Ppup020690.1, Ppup028400.1, Ppup033260.1, Ppup094070.1, Ppup134680.1, Ppup163850.1
GO:0044265	BP	e	cellular macromolecule catabolic process	158/2424	515/10157	0.000299199	5	158	0.0169769	Ppup001710.1, Ppup002450.1, Ppup002900.1, Ppup003610.1, Ppup004410.1, Ppup004570.1, Ppup005470.1, Ppup006490.1, Ppup008760.1, Ppup012830.1, Ppup014330.1, Ppup018680.1, Ppup018870.1, Ppup019010.1, Ppup019430.1, Ppup019820.1, Ppup020080.1, Ppup021070.1, Ppup023010.1, Ppup023070.1, Ppup025790.1, Ppup026220.1, Ppup026790.1, Ppup026960.1, Ppup027520.1, Ppup028140.1, Ppup031100.1, Ppup031510.1, Ppup031…
GO:0032007	BP	e	negative regulation of TOR signaling	14/2424	24/10157	0.000307011	8	14	0.0173322	Ppup009730.1, Ppup016190.1, Ppup018870.1, Ppup021300.1, Ppup026960.1, Ppup027280.1, Ppup030870.1, Ppup046770.1, Ppup057830.1, Ppup092000.1, Ppup134150.1, Ppup138770.1, Ppup149590.1, Ppup171790.1
GO:0002682	BP	e	regulation of immune system process	98/2424	297/10157	0.000309342	3	98	0.017376	Ppup002890.1, Ppup005470.1, Ppup008760.1, Ppup018600.1, Ppup019220.1, Ppup020500.1, Ppup022030.1, Ppup025760.1, Ppup026660.1, Ppup026790.1, Ppup027200.1, Ppup027500.1, Ppup027520.1, Ppup027790.1, Ppup027810.1, Ppup030870.1, Ppup035960.1, Ppup036280.1, Ppup037880.1, Ppup040010.1, Ppup043580.1, Ppup043740.1, Ppup045480.1, Ppup048850.1, Ppup050170.1, Ppup050410.1, Ppup052950.1, Ppup052960.1, Ppup053…
GO:0061919	BP	e	process utilizing autophagic mechanism	42/2424	106/10157	0.000322813	2	42	0.0179523	Ppup011300.1, Ppup018860.1, Ppup019820.1, Ppup020080.1, Ppup021570.1, Ppup022310.1, Ppup027050.1, Ppup028400.1, Ppup029460.1, Ppup030870.1, Ppup031510.1, Ppup031700.1, Ppup048770.1, Ppup049570.1, Ppup051070.1, Ppup053410.1, Ppup058440.1, Ppup063060.1, Ppup075710.1, Ppup076390.1, Ppup084770.1, Ppup085530.1, Ppup086320.1, Ppup095230.1, Ppup099200.1, Ppup106330.1, Ppup110950.1, Ppup116340.1, Ppup119…
GO:0006914	BP	e	autophagy	42/2424	106/10157	0.000322813	4	42	0.0179523	Ppup011300.1, Ppup018860.1, Ppup019820.1, Ppup020080.1, Ppup021570.1, Ppup022310.1, Ppup027050.1, Ppup028400.1, Ppup029460.1, Ppup030870.1, Ppup031510.1, Ppup031700.1, Ppup048770.1, Ppup049570.1, Ppup051070.1, Ppup053410.1, Ppup058440.1, Ppup063060.1, Ppup075710.1, Ppup076390.1, Ppup084770.1, Ppup085530.1, Ppup086320.1, Ppup095230.1, Ppup099200.1, Ppup106330.1, Ppup110950.1, Ppup116340.1, Ppup119…
GO:0042325	BP	e	regulation of phosphorylation	120/2424	376/10157	0.000333103	7	120	0.0184328	Ppup001800.1, Ppup003100.1, Ppup005280.1, Ppup005320.1, Ppup006490.1, Ppup006720.1, Ppup010070.1, Ppup013130.1, Ppup014250.1, Ppup017930.1, Ppup019820.1, Ppup021150.1, Ppup022170.1, Ppup024570.1, Ppup026440.1, Ppup027280.1, Ppup027410.1, Ppup027520.1, Ppup027810.1, Ppup028810.1, Ppup029910.1, Ppup030870.1, Ppup035940.1, Ppup036080.1, Ppup036980.1, Ppup037560.1, Ppup044130.1, Ppup044250.1, Ppup046…
GO:2000026	BP	e	regulation of multicellular organismal development	191/2424	642/10157	0.00039532	4	191	0.0216273	Ppup001800.1, Ppup002890.1, Ppup003170.1, Ppup004180.1, Ppup004410.1, Ppup005470.1, Ppup005490.1, Ppup006350.1, Ppup006950.1, Ppup007690.1, Ppup008680.1, Ppup010280.1, Ppup017950.1, Ppup018590.1, Ppup018680.1, Ppup018760.1, Ppup018960.1, Ppup019930.1, Ppup020690.1, Ppup022170.1, Ppup024220.1, Ppup024560.1, Ppup024570.1, Ppup024730.1, Ppup025100.1, Ppup025690.1, Ppup025760.1, Ppup026370.1, Ppup026…
GO:0006887	BP	e	exocytosis	50/2424	133/10157	0.000437217	6	50	0.0236097	Ppup001870.1, Ppup004180.1, Ppup008830.1, Ppup010330.1, Ppup018240.1, Ppup027680.1, Ppup040260.1, Ppup043610.1, Ppup048800.1, Ppup048860.1, Ppup050340.1, Ppup052220.1, Ppup052260.1, Ppup053510.1, Ppup054430.1, Ppup058040.1, Ppup063500.1, Ppup075410.1, Ppup081800.1, Ppup082260.1, Ppup082790.1, Ppup084510.1, Ppup086420.1, Ppup086490.1, Ppup091630.1, Ppup093240.1, Ppup093840.1, Ppup096670.1, Ppup097…
GO:0010648	BP	e	negative regulation of cell communication	131/2424	420/10157	0.000444032	5	131	0.0237483	Ppup005490.1, Ppup005940.1, Ppup006490.1, Ppup006990.1, Ppup007690.1, Ppup008700.1, Ppup008760.1, Ppup008830.1, Ppup009230.1, Ppup009730.1, Ppup010070.1, Ppup011100.1, Ppup012830.1, Ppup014250.1, Ppup016190.1, Ppup017930.1, Ppup018870.1, Ppup019690.1, Ppup020310.1, Ppup020690.1, Ppup021300.1, Ppup021570.1, Ppup023070.1, Ppup024220.1, Ppup024370.1, Ppup024510.1, Ppup024730.1, Ppup026960.1, Ppup027…
GO:0023057	BP	e	negative regulation of signaling	131/2424	420/10157	0.000444032	4	131	0.0237483	Ppup005490.1, Ppup005940.1, Ppup006490.1, Ppup006990.1, Ppup007690.1, Ppup008700.1, Ppup008760.1, Ppup008830.1, Ppup009230.1, Ppup009730.1, Ppup010070.1, Ppup011100.1, Ppup012830.1, Ppup014250.1, Ppup016190.1, Ppup017930.1, Ppup018870.1, Ppup019690.1, Ppup020310.1, Ppup020690.1, Ppup021300.1, Ppup021570.1, Ppup023070.1, Ppup024220.1, Ppup024370.1, Ppup024510.1, Ppup024730.1, Ppup026960.1, Ppup027…
GO:0046474	BP	e	glycerophospholipid biosynthetic process	29/2424	67/10157	0.000451078	7	29	0.0240102	Ppup004450.1, Ppup006440.1, Ppup017930.1, Ppup020690.1, Ppup027260.1, Ppup028400.1, Ppup030030.1, Ppup037910.1, Ppup040660.1, Ppup040690.1, Ppup044790.1, Ppup085530.1, Ppup092170.1, Ppup106250.1, Ppup106260.1, Ppup106700.1, Ppup115200.1, Ppup123980.1, Ppup126400.1, Ppup131820.1, Ppup134680.1, Ppup135100.1, Ppup141050.1, Ppup147010.1, Ppup152280.1, Ppup153110.1, Ppup162420.1, Ppup167390.1, Ppup175…
GO:0051493	BP	e	regulation of cytoskeleton organization	71/2424	205/10157	0.000471541	6	71	0.0249805	Ppup005490.1, Ppup006810.1, Ppup009190.1, Ppup018600.1, Ppup018760.1, Ppup021210.1, Ppup022170.1, Ppup025690.1, Ppup025950.1, Ppup027280.1, Ppup028810.1, Ppup031510.1, Ppup036980.1, Ppup040670.1, Ppup042150.1, Ppup043440.1, Ppup043580.1, Ppup044250.1, Ppup053460.1, Ppup055320.1, Ppup057310.1, Ppup064390.1, Ppup071370.1, Ppup075230.1, Ppup077190.1, Ppup080260.1, Ppup084230.1, Ppup084280.1, Ppup084…
GO:0015914	BP	e	phospholipid transport	17/2424	32/10157	0.000486908	7	17	0.0255524	Ppup030030.1, Ppup043200.1, Ppup047250.1, Ppup053500.1, Ppup058400.1, Ppup060140.1, Ppup075760.1, Ppup082260.1, Ppup094530.1, Ppup104600.1, Ppup109420.1, Ppup109430.1, Ppup132510.1, Ppup134340.1, Ppup162270.1, Ppup166000.1, Ppup166680.1
GO:0044093	BP	e	positive regulation of molecular function	114/2424	358/10157	0.000496184	3	114	0.025797	Ppup003230.1, Ppup003910.1, Ppup005280.1, Ppup006810.1, Ppup007260.1, Ppup009830.1, Ppup011220.1, Ppup011300.1, Ppup013130.1, Ppup013200.1, Ppup015730.1, Ppup018680.1, Ppup019150.1, Ppup020270.1, Ppup021180.1, Ppup022170.1, Ppup026440.1, Ppup027050.1, Ppup027280.1, Ppup027780.1, Ppup027810.1, Ppup028810.1, Ppup029350.1, Ppup030870.1, Ppup035940.1, Ppup036080.1, Ppup036980.1, Ppup037560.1, Ppup040…
GO:0030833	BP	e	regulation of actin filament polymerization	26/2424	58/10157	0.000506539	10	26	0.0262134	Ppup005490.1, Ppup006810.1, Ppup009190.1, Ppup018600.1, Ppup021210.1, Ppup022170.1, Ppup036980.1, Ppup042150.1, Ppup044250.1, Ppup064390.1, Ppup075230.1, Ppup084280.1, Ppup084510.1, Ppup086990.1, Ppup090820.1, Ppup109160.1, Ppup114260.1, Ppup115500.1, Ppup122880.1, Ppup126790.1, Ppup135110.1, Ppup142060.1, Ppup143960.1, Ppup145020.1, Ppup150900.1, Ppup171700.1
GO:0051443	BP	e	positive regulation of ubiquitin-protein transferase activity	10/2424	15/10157	0.00052802	11	10	0.0270613	Ppup013200.1, Ppup018680.1, Ppup040150.1, Ppup053660.1, Ppup059860.1, Ppup079510.1, Ppup082970.1, Ppup090640.1, Ppup139970.1, Ppup141010.1
GO:0051345	BP	e	positive regulation of hydrolase activity	44/2424	114/10157	0.000530186	5	44	0.0270613	Ppup006810.1, Ppup007260.1, Ppup011300.1, Ppup020270.1, Ppup027050.1, Ppup027280.1, Ppup027780.1, Ppup029350.1, Ppup036980.1, Ppup042910.1, Ppup043550.1, Ppup049760.1, Ppup052710.1, Ppup057830.1, Ppup059100.1, Ppup061710.1, Ppup063210.1, Ppup065980.1, Ppup074730.1, Ppup075920.1, Ppup077440.1, Ppup084510.1, Ppup086170.1, Ppup092470.1, Ppup093070.1, Ppup095230.1, Ppup098430.1, Ppup103700.1, Ppup114…
GO:0040007	BP	e	growth	61/2424	171/10157	0.000533048	1	61	0.0270837	Ppup003740.1, Ppup003910.1, Ppup004410.1, Ppup005470.1, Ppup006660.1, Ppup006950.1, Ppup008830.1, Ppup019930.1, Ppup022170.1, Ppup024570.1, Ppup027500.1, Ppup028360.1, Ppup028600.1, Ppup030870.1, Ppup031080.1, Ppup035600.1, Ppup035960.1, Ppup036080.1, Ppup039560.1, Ppup043580.1, Ppup045860.1, Ppup046770.1, Ppup049480.1, Ppup058220.1, Ppup058400.1, Ppup062600.1, Ppup063260.1, Ppup071370.1, Ppup073…
GO:0031331	BP	e	positive regulation of cellular catabolic process	56/2424	154/10157	0.000544267	6	56	0.0275286	Ppup005320.1, Ppup011120.1, Ppup020080.1, Ppup020310.1, Ppup021300.1, Ppup025880.1, Ppup025910.1, Ppup026790.1, Ppup027280.1, Ppup027520.1, Ppup029460.1, Ppup030870.1, Ppup037330.1, Ppup040010.1, Ppup040060.1, Ppup049010.1, Ppup049570.1, Ppup050100.1, Ppup052760.1, Ppup057460.1, Ppup057490.1, Ppup057970.1, Ppup061620.1, Ppup064000.1, Ppup075680.1, Ppup075920.1, Ppup076390.1, Ppup076900.1, Ppup084…
GO:0048869	BP	e	cellular developmental process	290/2424	1025/10157	0.000577065	2	290	0.029056	Ppup001710.1, Ppup001870.1, Ppup003100.1, Ppup003170.1, Ppup003740.1, Ppup003910.1, Ppup005470.1, Ppup006660.1, Ppup006950.1, Ppup007560.1, Ppup008030.1, Ppup008570.1, Ppup009190.1, Ppup009830.1, Ppup011100.1, Ppup011180.1, Ppup011200.1, Ppup011560.1, Ppup013930.1, Ppup014060.1, Ppup014270.1, Ppup014360.1, Ppup015880.1, Ppup015890.1, Ppup017950.1, Ppup018070.1, Ppup018590.1, Ppup018600.1, Ppup018…
GO:0009968	BP	e	negative regulation of signal transduction	120/2424	381/10157	0.000579978	6	120	0.0290717	Ppup005490.1, Ppup005940.1, Ppup006490.1, Ppup006990.1, Ppup007690.1, Ppup008700.1, Ppup008760.1, Ppup009230.1, Ppup009730.1, Ppup010070.1, Ppup011100.1, Ppup012830.1, Ppup014250.1, Ppup016190.1, Ppup018870.1, Ppup019690.1, Ppup020310.1, Ppup020690.1, Ppup021300.1, Ppup021570.1, Ppup023070.1, Ppup024220.1, Ppup024370.1, Ppup024510.1, Ppup024730.1, Ppup026960.1, Ppup027280.1, Ppup027490.1, Ppup027…
GO:0051093	BP	e	negative regulation of developmental process	82/2424	245/10157	0.000604566	4	82	0.0300348	Ppup001800.1, Ppup003100.1, Ppup003170.1, Ppup004410.1, Ppup005320.1, Ppup005490.1, Ppup005940.1, Ppup007690.1, Ppup018960.1, Ppup020310.1, Ppup020690.1, Ppup024220.1, Ppup024730.1, Ppup025690.1, Ppup026310.1, Ppup026790.1, Ppup026960.1, Ppup027280.1, Ppup027410.1, Ppup027690.1, Ppup028100.1, Ppup028360.1, Ppup030870.1, Ppup035800.1, Ppup035960.1, Ppup039090.1, Ppup043150.1, Ppup043200.1, Ppup052…
GO:0048584	BP	e	positive regulation of response to stimulus	173/2424	578/10157	0.000619016	4	173	0.0306166	Ppup001710.1, Ppup001800.1, Ppup004150.1, Ppup004410.1, Ppup004550.1, Ppup005280.1, Ppup005490.1, Ppup006190.1, Ppup006490.1, Ppup006500.1, Ppup008760.1, Ppup010210.1, Ppup010280.1, Ppup010900.1, Ppup011100.1, Ppup011470.1, Ppup013130.1, Ppup017410.1, Ppup017930.1, Ppup019150.1, Ppup019460.1, Ppup019930.1, Ppup020080.1, Ppup020500.1, Ppup022170.1, Ppup024570.1, Ppup025490.1, Ppup026660.1, Ppup026…
GO:0042221	BP	e	response to chemical	226/2424	780/10157	0.000641435	2	226	0.0315857	Ppup002480.1, Ppup002900.1, Ppup003740.1, Ppup003910.1, Ppup004140.1, Ppup004410.1, Ppup005940.1, Ppup006210.1, Ppup006830.1, Ppup008760.1, Ppup009230.1, Ppup009340.1, Ppup009830.1, Ppup013130.1, Ppup013150.1, Ppup017950.1, Ppup018270.1, Ppup018690.1, Ppup018870.1, Ppup019150.1, Ppup019460.1, Ppup019930.1, Ppup020080.1, Ppup021070.1, Ppup021090.1, Ppup021150.1, Ppup021780.1, Ppup022030.1, Ppup022…
GO:0023056	BP	e	positive regulation of signaling	143/2424	467/10157	0.000678356	4	143	0.0331938	Ppup001710.1, Ppup001800.1, Ppup002780.1, Ppup004150.1, Ppup004410.1, Ppup004550.1, Ppup005280.1, Ppup005490.1, Ppup005940.1, Ppup006490.1, Ppup006500.1, Ppup009190.1, Ppup010210.1, Ppup010280.1, Ppup010900.1, Ppup011100.1, Ppup011470.1, Ppup013130.1, Ppup017930.1, Ppup019150.1, Ppup019460.1, Ppup019930.1, Ppup022170.1, Ppup024570.1, Ppup025100.1, Ppup026790.1, Ppup026960.1, Ppup027200.1, Ppup027…
GO:0050803	BP	e	regulation of synapse structure or activity	9/2424	13/10157	0.000680031	3	9	0.0331938	Ppup012590.1, Ppup048860.1, Ppup090730.1, Ppup113230.1, Ppup116570.1, Ppup135110.1, Ppup137460.1, Ppup150610.1, Ppup172980.1
GO:0043087	BP	e	regulation of GTPase activity	36/2424	90/10157	0.000683426	5	36	0.0332145	Ppup003170.1, Ppup006810.1, Ppup007260.1, Ppup011300.1, Ppup018860.1, Ppup020270.1, Ppup027280.1, Ppup027780.1, Ppup029350.1, Ppup036980.1, Ppup042910.1, Ppup044250.1, Ppup049760.1, Ppup052710.1, Ppup057830.1, Ppup059100.1, Ppup065980.1, Ppup074730.1, Ppup075890.1, Ppup084510.1, Ppup086170.1, Ppup093070.1, Ppup098430.1, Ppup114050.1, Ppup115270.1, Ppup134680.1, Ppup144610.1, Ppup145510.1, Ppup145…
GO:0006869	BP	e	lipid transport	47/2424	126/10157	0.000694906	5	47	0.0336262	Ppup002480.1, Ppup011610.1, Ppup030030.1, Ppup031510.1, Ppup038150.1, Ppup043200.1, Ppup047250.1, Ppup051070.1, Ppup053500.1, Ppup057820.1, Ppup058400.1, Ppup060140.1, Ppup075190.1, Ppup075410.1, Ppup075760.1, Ppup082200.1, Ppup082260.1, Ppup094530.1, Ppup104600.1, Ppup109420.1, Ppup109430.1, Ppup112480.1, Ppup116490.1, Ppup116890.1, Ppup123320.1, Ppup127190.1, Ppup127210.1, Ppup130100.1, Ppup132…
GO:0051050	BP	e	positive regulation of transport	86/2424	261/10157	0.000698112	5	86	0.0336358	Ppup002780.1, Ppup003070.1, Ppup003230.1, Ppup005940.1, Ppup006490.1, Ppup007260.1, Ppup009830.1, Ppup010280.1, Ppup011220.1, Ppup011470.1, Ppup017930.1, Ppup020500.1, Ppup020690.1, Ppup021570.1, Ppup026440.1, Ppup027200.1, Ppup027680.1, Ppup029460.1, Ppup031510.1, Ppup036980.1, Ppup037880.1, Ppup040410.1, Ppup043200.1, Ppup047070.1, Ppup050170.1, Ppup050340.1, Ppup054230.1, Ppup057910.1, Ppup059…
GO:0006886	BP	e	intracellular protein transport	115/2424	365/10157	0.00071072	8	115	0.0340052	Ppup003030.1, Ppup004180.1, Ppup004330.1, Ppup004540.1, Ppup006950.1, Ppup008770.1, Ppup011180.1, Ppup011300.1, Ppup012830.1, Ppup015740.1, Ppup018840.1, Ppup020270.1, Ppup020290.1, Ppup020500.1, Ppup021570.1, Ppup021780.1, Ppup021890.1, Ppup025920.1, Ppup026960.1, Ppup027780.1, Ppup028260.1, Ppup029350.1, Ppup029460.1, Ppup033490.1, Ppup035750.1, Ppup038210.1, Ppup043570.1, Ppup044210.1, Ppup046…
GO:0042176	BP	e	regulation of protein catabolic process	52/2424	143/10157	0.000725313	6	52	0.0345002	Ppup001710.1, Ppup004410.1, Ppup005320.1, Ppup008760.1, Ppup011260.1, Ppup020080.1, Ppup025910.1, Ppup026630.1, Ppup026960.1, Ppup029460.1, Ppup037330.1, Ppup037560.1, Ppup038210.1, Ppup039790.1, Ppup046570.1, Ppup049010.1, Ppup050100.1, Ppup050680.1, Ppup050770.1, Ppup052760.1, Ppup053460.1, Ppup057490.1, Ppup057970.1, Ppup061620.1, Ppup063940.1, Ppup075920.1, Ppup076390.1, Ppup080280.1, Ppup087…
GO:0043648	BP	e	dicarboxylic acid metabolic process	25/2424	56/10157	0.000731187	6	25	0.0346322	Ppup010470.1, Ppup022030.1, Ppup029370.1, Ppup037550.1, Ppup043390.1, Ppup055840.1, Ppup083660.1, Ppup084410.1, Ppup085610.1, Ppup096410.1, Ppup111050.1, Ppup113550.1, Ppup125740.1, Ppup137610.1, Ppup138850.1, Ppup141310.1, Ppup145850.1, Ppup156530.1, Ppup160640.1, Ppup160680.1, Ppup161150.1, Ppup167240.1, Ppup168100.1, Ppup175870.1, Ppup176440.1
GO:0006656	BP	e	phosphatidylcholine biosynthetic process	5/2424	5/10157	0.000771739	8	5	0.0363987	Ppup030030.1, Ppup044790.1, Ppup092170.1, Ppup115200.1, Ppup162420.1
GO:0043254	BP	e	regulation of protein-containing complex assembly	50/2424	137/10157	0.000813437	5	50	0.0382042	Ppup005280.1, Ppup005490.1, Ppup005970.1, Ppup006810.1, Ppup009190.1, Ppup018070.1, Ppup018600.1, Ppup018690.1, Ppup021210.1, Ppup022170.1, Ppup029460.1, Ppup036980.1, Ppup042150.1, Ppup044250.1, Ppup062600.1, Ppup063940.1, Ppup064390.1, Ppup075230.1, Ppup075330.1, Ppup077190.1, Ppup080260.1, Ppup082200.1, Ppup084280.1, Ppup084510.1, Ppup086470.1, Ppup086510.1, Ppup086990.1, Ppup087090.1, Ppup090…
GO:0043691	BP	e	reverse cholesterol transport	8/2424	11/10157	0.000845651	8	8	0.0394724	Ppup043200.1, Ppup047250.1, Ppup060140.1, Ppup104600.1, Ppup109420.1, Ppup109430.1, Ppup130100.1, Ppup162270.1
GO:0015711	BP	e	organic anion transport	67/2424	194/10157	0.000847502	6	67	0.0394724	Ppup004080.1, Ppup004420.1, Ppup007130.1, Ppup010230.1, Ppup024330.1, Ppup025130.1, Ppup028060.1, Ppup030030.1, Ppup031080.1, Ppup031630.1, Ppup035920.1, Ppup038150.1, Ppup043200.1, Ppup046230.1, Ppup047250.1, Ppup051070.1, Ppup053500.1, Ppup057970.1, Ppup058400.1, Ppup060140.1, Ppup063970.1, Ppup064670.1, Ppup074560.1, Ppup074640.1, Ppup075760.1, Ppup077110.1, Ppup079800.1, Ppup082200.1, Ppup082…
GO:0046903	BP	e	secretion	79/2424	237/10157	0.000869825	4	79	0.040344	Ppup001870.1, Ppup004180.1, Ppup005830.1, Ppup006950.1, Ppup007130.1, Ppup008830.1, Ppup010330.1, Ppup017870.1, Ppup018240.1, Ppup024220.1, Ppup027680.1, Ppup038150.1, Ppup039720.1, Ppup040260.1, Ppup043610.1, Ppup048800.1, Ppup048860.1, Ppup050340.1, Ppup052220.1, Ppup052260.1, Ppup053500.1, Ppup053510.1, Ppup054430.1, Ppup058040.1, Ppup063500.1, Ppup075410.1, Ppup076820.1, Ppup081800.1, Ppup082…
GO:0031058	BP	e	positive regulation of histone modification	17/2424	34/10157	0.000911665	9	17	0.0418581	Ppup019810.1, Ppup035070.1, Ppup035890.1, Ppup037880.1, Ppup039960.1, Ppup042410.1, Ppup043580.1, Ppup049720.1, Ppup061660.1, Ppup108340.1, Ppup122630.1, Ppup123820.1, Ppup130950.1, Ppup133560.1, Ppup140050.1, Ppup143800.1, Ppup176270.1
GO:0006457	BP	e	protein folding	39/2424	101/10157	0.000913704	2	39	0.0418581	Ppup002900.1, Ppup004040.1, Ppup010330.1, Ppup018070.1, Ppup018300.1, Ppup021070.1, Ppup025690.1, Ppup025820.1, Ppup026830.1, Ppup027490.1, Ppup028830.1, Ppup039150.1, Ppup053850.1, Ppup059830.1, Ppup061580.1, Ppup063060.1, Ppup069400.1, Ppup075210.1, Ppup075920.1, Ppup076830.1, Ppup083350.1, Ppup087100.1, Ppup094490.1, Ppup094610.1, Ppup094800.1, Ppup096980.1, Ppup099390.1, Ppup101230.1, Ppup103…
GO:0016477	BP	e	cell migration	83/2424	251/10157	0.000919903	4	83	0.0419701	Ppup001870.1, Ppup003170.1, Ppup003910.1, Ppup004200.1, Ppup005460.1, Ppup005490.1, Ppup010900.1, Ppup011200.1, Ppup017950.1, Ppup018760.1, Ppup021210.1, Ppup021490.1, Ppup022170.1, Ppup025130.1, Ppup026660.1, Ppup026670.1, Ppup027500.1, Ppup036280.1, Ppup037540.1, Ppup039320.1, Ppup042150.1, Ppup043440.1, Ppup047250.1, Ppup048860.1, Ppup053410.1, Ppup057910.1, Ppup058840.1, Ppup059820.1, Ppup060…
GO:0042593	BP	e	glucose homeostasis	19/2424	39/10157	0.0009333	6	19	0.0422365	Ppup009900.1, Ppup026550.1, Ppup030870.1, Ppup040860.1, Ppup062600.1, Ppup074930.1, Ppup075380.1, Ppup094070.1, Ppup106330.1, Ppup108180.1, Ppup119950.1, Ppup124080.1, Ppup138910.1, Ppup152140.1, Ppup157280.1, Ppup162500.1, Ppup165290.1, Ppup171790.1, Ppup176270.1
GO:0033500	BP	e	carbohydrate homeostasis	19/2424	39/10157	0.0009333	5	19	0.0422365	Ppup009900.1, Ppup026550.1, Ppup030870.1, Ppup040860.1, Ppup062600.1, Ppup074930.1, Ppup075380.1, Ppup094070.1, Ppup106330.1, Ppup108180.1, Ppup119950.1, Ppup124080.1, Ppup138910.1, Ppup152140.1, Ppup157280.1, Ppup162500.1, Ppup165290.1, Ppup171790.1, Ppup176270.1
GO:0098656	BP	e	anion transmembrane transport	35/2424	88/10157	0.000943451	6	35	0.0422529	Ppup002250.1, Ppup004420.1, Ppup020100.1, Ppup025890.1, Ppup028060.1, Ppup031080.1, Ppup031630.1, Ppup035920.1, Ppup040030.1, Ppup046230.1, Ppup051070.1, Ppup053760.1, Ppup057970.1, Ppup071180.1, Ppup074560.1, Ppup074640.1, Ppup076180.1, Ppup077110.1, Ppup085610.1, Ppup086080.1, Ppup097640.1, Ppup106580.1, Ppup109260.1, Ppup122620.1, Ppup127000.1, Ppup127030.1, Ppup130380.1, Ppup133180.1, Ppup138…
GO:0062012	BP	e	regulation of small molecule metabolic process	35/2424	88/10157	0.000943451	4	35	0.0422529	Ppup005470.1, Ppup005940.1, Ppup011120.1, Ppup025880.1, Ppup026550.1, Ppup043200.1, Ppup045850.1, Ppup046270.1, Ppup051070.1, Ppup052580.1, Ppup052760.1, Ppup057830.1, Ppup075960.1, Ppup094070.1, Ppup095640.1, Ppup097870.1, Ppup102180.1, Ppup103510.1, Ppup104600.1, Ppup106130.1, Ppup109420.1, Ppup109430.1, Ppup114980.1, Ppup114990.1, Ppup123340.1, Ppup125780.1, Ppup126800.1, Ppup140050.1, Ppup144…
GO:0030707	BP	e	ovarian follicle cell development	22/2424	48/10157	0.000945001	6	22	0.0422529	Ppup018590.1, Ppup031700.1, Ppup039090.1, Ppup042450.1, Ppup045950.1, Ppup050410.1, Ppup058840.1, Ppup065950.1, Ppup086980.1, Ppup095850.1, Ppup109360.1, Ppup114260.1, Ppup135110.1, Ppup135280.1, Ppup137460.1, Ppup142950.1, Ppup145680.1, Ppup146090.1, Ppup165510.1, Ppup173180.1, Ppup173790.1, Ppup173910.1
GO:0001932	BP	e	regulation of protein phosphorylation	104/2424	328/10157	0.000972888	8	104	0.0433264	Ppup001800.1, Ppup005280.1, Ppup005320.1, Ppup006490.1, Ppup006720.1, Ppup010070.1, Ppup013130.1, Ppup014250.1, Ppup017930.1, Ppup021150.1, Ppup022170.1, Ppup024570.1, Ppup026440.1, Ppup027280.1, Ppup027410.1, Ppup027520.1, Ppup027810.1, Ppup028810.1, Ppup029910.1, Ppup030870.1, Ppup035940.1, Ppup036080.1, Ppup036980.1, Ppup037560.1, Ppup044130.1, Ppup044250.1, Ppup046070.1, Ppup048770.1, Ppup049…
GO:0090102	BP	e	cochlea development	6/2424	7/10157	0.0010244	3	6	0.0451708	Ppup071180.1, Ppup086420.1, Ppup099460.1, Ppup124670.1, Ppup140860.1, Ppup173320.1
GO:0046326	BP	e	positive regulation of glucose import	6/2424	7/10157	0.0010244	8	6	0.0451708	Ppup036980.1, Ppup062600.1, Ppup075760.1, Ppup086080.1, Ppup103510.1, Ppup106330.1
GO:0045595	BP	e	regulation of cell differentiation	170/2424	573/10157	0.00102643	4	170	0.0451708	Ppup001800.1, Ppup002890.1, Ppup004180.1, Ppup004410.1, Ppup005320.1, Ppup005490.1, Ppup005940.1, Ppup006950.1, Ppup007690.1, Ppup008020.1, Ppup010280.1, Ppup017950.1, Ppup018680.1, Ppup018760.1, Ppup019930.1, Ppup020310.1, Ppup021200.1, Ppup022170.1, Ppup024220.1, Ppup025100.1, Ppup025690.1, Ppup025760.1, Ppup026310.1, Ppup026370.1, Ppup026790.1, Ppup026960.1, Ppup027050.1, Ppup027280.1, Ppup027…
GO:0034248	BP	e	regulation of cellular amide metabolic process	68/2424	200/10157	0.00104156	5	68	0.045657	Ppup003740.1, Ppup006720.1, Ppup016860.1, Ppup017930.1, Ppup020310.1, Ppup021150.1, Ppup026790.1, Ppup027120.1, Ppup027200.1, Ppup027280.1, Ppup027490.1, Ppup027520.1, Ppup040010.1, Ppup043200.1, Ppup043500.1, Ppup046770.1, Ppup050410.1, Ppup057750.1, Ppup062590.1, Ppup063480.1, Ppup064000.1, Ppup069240.1, Ppup074180.1, Ppup074810.1, Ppup075580.1, Ppup076830.1, Ppup076900.1, Ppup077340.1, Ppup077…
GO:0015850	BP	e	organic hydroxy compound transport	20/2424	43/10157	0.00106351	5	20	0.0462567	Ppup002480.1, Ppup031510.1, Ppup043200.1, Ppup047250.1, Ppup057820.1, Ppup060140.1, Ppup075190.1, Ppup075410.1, Ppup076820.1, Ppup082200.1, Ppup104600.1, Ppup109420.1, Ppup109430.1, Ppup122880.1, Ppup123320.1, Ppup130100.1, Ppup137980.1, Ppup144280.1, Ppup162270.1, Ppup165030.1
GO:1902904	BP	e	negative regulation of supramolecular fiber organization	20/2424	43/10157	0.00106351	6	20	0.0462567	Ppup005490.1, Ppup009190.1, Ppup021210.1, Ppup043440.1, Ppup064390.1, Ppup077190.1, Ppup080260.1, Ppup084280.1, Ppup084510.1, Ppup087280.1, Ppup094070.1, Ppup098040.1, Ppup106040.1, Ppup114260.1, Ppup122880.1, Ppup126790.1, Ppup134010.1, Ppup142060.1, Ppup150900.1, Ppup165030.1
GO:0046843	BP	e	dorsal appendage formation	12/2424	21/10157	0.00107533	3	12	0.0464093	Ppup022170.1, Ppup031700.1, Ppup052950.1, Ppup052960.1, Ppup113610.1, Ppup135110.1, Ppup140190.1, Ppup142950.1, Ppup145680.1, Ppup146090.1, Ppup152870.1, Ppup165510.1
GO:0048512	BP	e	circadian behavior	12/2424	21/10157	0.00107533	3	12	0.0464093	Ppup018590.1, Ppup040750.1, Ppup040930.1, Ppup045860.1, Ppup058840.1, Ppup064000.1, Ppup104550.1, Ppup109360.1, Ppup130180.1, Ppup143520.1, Ppup144280.1, Ppup168340.1
GO:0051963	BP	e	regulation of synapse assembly	26/2424	60/10157	0.00113382	6	26	0.0487457	Ppup008680.1, Ppup010280.1, Ppup022170.1, Ppup027690.1, Ppup039090.1, Ppup046770.1, Ppup048860.1, Ppup052710.1, Ppup059940.1, Ppup064250.1, Ppup071370.1, Ppup074880.1, Ppup084450.1, Ppup090820.1, Ppup101280.1, Ppup103270.1, Ppup109360.1, Ppup112480.1, Ppup120140.1, Ppup126170.1, Ppup133890.1, Ppup150610.1, Ppup151290.1, Ppup167630.1, Ppup168760.1, Ppup174910.1
GO:0043244	BP	e	regulation of protein-containing complex disassembly	19/2424	40/10157	0.00116368	5	19	0.0498377	Ppup005470.1, Ppup009190.1, Ppup011300.1, Ppup021210.1, Ppup024160.1, Ppup043440.1, Ppup064390.1, Ppup087280.1, Ppup101240.1, Ppup106040.1, Ppup114260.1, Ppup120140.1, Ppup126790.1, Ppup140310.1, Ppup142060.1, Ppup150900.1, Ppup151290.1, Ppup165030.1, Ppup167630.1
GO:0034976	BP	e	response to endoplasmic reticulum stress	36/2424	92/10157	0.00122147	4	36	0.0517183	Ppup002900.1, Ppup006830.1, Ppup017930.1, Ppup020080.1, Ppup021070.1, Ppup021150.1, Ppup022310.1, Ppup031560.1, Ppup038210.1, Ppup048420.1, Ppup061580.1, Ppup063300.1, Ppup070550.1, Ppup075210.1, Ppup075690.1, Ppup075920.1, Ppup087100.1, Ppup092790.1, Ppup094800.1, Ppup095780.1, Ppup106300.1, Ppup106350.1, Ppup110550.1, Ppup111430.1, Ppup114920.1, Ppup116770.1, Ppup122830.1, Ppup126800.1, Ppup127…
GO:0048167	BP	e	regulation of synaptic plasticity	24/2424	55/10157	0.0012477	7	24	0.0526295	Ppup004150.1, Ppup018140.1, Ppup018680.1, Ppup019200.1, Ppup025100.1, Ppup038420.1, Ppup038960.1, Ppup043580.1, Ppup048770.1, Ppup052260.1, Ppup052710.1, Ppup054430.1, Ppup064880.1, Ppup075410.1, Ppup098040.1, Ppup101280.1, Ppup106330.1, Ppup108120.1, Ppup113560.1, Ppup122880.1, Ppup135110.1, Ppup150610.1, Ppup165290.1, Ppup174910.1
GO:0048585	BP	e	negative regulation of response to stimulus	142/2424	469/10157	0.00126419	4	142	0.0531244	Ppup003100.1, Ppup005490.1, Ppup005940.1, Ppup006490.1, Ppup006990.1, Ppup007690.1, Ppup008700.1, Ppup008760.1, Ppup009230.1, Ppup009730.1, Ppup010070.1, Ppup010330.1, Ppup011100.1, Ppup011120.1, Ppup012830.1, Ppup014250.1, Ppup016190.1, Ppup018600.1, Ppup018870.1, Ppup019690.1, Ppup020310.1, Ppup020690.1, Ppup021300.1, Ppup021570.1, Ppup023070.1, Ppup024220.1, Ppup024370.1, Ppup024510.1, Ppup024…
GO:0007169	BP	e	transmembrane receptor protein tyrosine kinase signaling pathway	43/2424	115/10157	0.00127476	7	43	0.053368	Ppup010070.1, Ppup014250.1, Ppup017950.1, Ppup022170.1, Ppup024220.1, Ppup036080.1, Ppup042910.1, Ppup046770.1, Ppup052710.1, Ppup054440.1, Ppup058240.1, Ppup062600.1, Ppup063940.1, Ppup075890.1, Ppup077440.1, Ppup083740.1, Ppup086470.1, Ppup086530.1, Ppup087280.1, Ppup092980.1, Ppup098070.1, Ppup101280.1, Ppup103510.1, Ppup110290.1, Ppup111240.1, Ppup112420.1, Ppup114050.1, Ppup114300.1, Ppup116…
GO:0006325	BP	e	chromatin organization	133/2424	437/10157	0.00129569	4	133	0.0540417	Ppup001800.1, Ppup003100.1, Ppup003120.1, Ppup003620.1, Ppup003930.1, Ppup005470.1, Ppup007710.1, Ppup008730.1, Ppup011100.1, Ppup011260.1, Ppup012980.1, Ppup013200.1, Ppup014100.1, Ppup015790.1, Ppup018270.1, Ppup018600.1, Ppup018630.1, Ppup018690.1, Ppup018870.1, Ppup018890.1, Ppup019100.1, Ppup019150.1, Ppup019160.1, Ppup019460.1, Ppup019810.1, Ppup019950.1, Ppup021480.1, Ppup022280.1, Ppup025…
GO:0007165	BP	e	signal transduction	347/2424	1261/10157	0.0013138	4	347	0.0545078	Ppup002240.1, Ppup002790.1, Ppup002870.1, Ppup002900.1, Ppup003170.1, Ppup003230.1, Ppup004410.1, Ppup004450.1, Ppup005470.1, Ppup006350.1, Ppup006490.1, Ppup006810.1, Ppup007690.1, Ppup008630.1, Ppup008680.1, Ppup008760.1, Ppup008980.1, Ppup009680.1, Ppup009730.1, Ppup009830.1, Ppup010070.1, Ppup010900.1, Ppup011260.1, Ppup011620.1, Ppup014250.1, Ppup015110.1, Ppup016230.1, Ppup017410.1, Ppup017…
GO:0030301	BP	e	cholesterol transport	16/2424	32/10157	0.00132149	7	16	0.0545078	Ppup002480.1, Ppup031510.1, Ppup043200.1, Ppup047250.1, Ppup057820.1, Ppup060140.1, Ppup075190.1, Ppup075410.1, Ppup104600.1, Ppup109420.1, Ppup109430.1, Ppup123320.1, Ppup130100.1, Ppup137980.1, Ppup162270.1, Ppup165030.1
GO:1905954	BP	e	positive regulation of lipid localization	16/2424	32/10157	0.00132149	5	16	0.0545078	Ppup005940.1, Ppup017930.1, Ppup027250.1, Ppup037880.1, Ppup043200.1, Ppup047250.1, Ppup054230.1, Ppup060140.1, Ppup082260.1, Ppup104600.1, Ppup109420.1, Ppup109430.1, Ppup120280.1, Ppup130100.1, Ppup140970.1, Ppup162270.1
GO:0016241	BP	e	regulation of macroautophagy	21/2424	46/10157	0.00137472	7	21	0.0564951	Ppup011300.1, Ppup021300.1, Ppup025910.1, Ppup027280.1, Ppup028400.1, Ppup029350.1, Ppup046770.1, Ppup051070.1, Ppup057460.1, Ppup058670.1, Ppup076900.1, Ppup083070.1, Ppup101240.1, Ppup116340.1, Ppup122830.1, Ppup134150.1, Ppup140310.1, Ppup141670.1, Ppup160690.1, Ppup171790.1, Ppup174280.1
GO:0070647	BP	e	protein modification by small protein conjugation or removal	144/2424	478/10157	0.00140176	7	144	0.0573952	Ppup001710.1, Ppup001720.1, Ppup001730.1, Ppup002450.1, Ppup002900.1, Ppup003610.1, Ppup004410.1, Ppup004570.1, Ppup008630.1, Ppup008760.1, Ppup010900.1, Ppup012830.1, Ppup013200.1, Ppup018680.1, Ppup018690.1, Ppup018870.1, Ppup019010.1, Ppup019430.1, Ppup020080.1, Ppup021280.1, Ppup021570.1, Ppup023000.1, Ppup023070.1, Ppup023680.1, Ppup024220.1, Ppup024570.1, Ppup025110.1, Ppup025910.1, Ppup026…
GO:0009185	BP	e	ribonucleoside diphosphate metabolic process	15/2424	29/10157	0.00141907	8	15	0.0574191	Ppup009900.1, Ppup026550.1, Ppup039110.1, Ppup040860.1, Ppup052600.1, Ppup074930.1, Ppup075960.1, Ppup113400.1, Ppup117160.1, Ppup119950.1, Ppup122750.1, Ppup123890.1, Ppup152140.1, Ppup162500.1, Ppup167240.1
GO:0009179	BP	e	purine ribonucleoside diphosphate metabolic process	15/2424	29/10157	0.00141907	9	15	0.0574191	Ppup009900.1, Ppup026550.1, Ppup039110.1, Ppup040860.1, Ppup052600.1, Ppup074930.1, Ppup075960.1, Ppup113400.1, Ppup117160.1, Ppup119950.1, Ppup122750.1, Ppup123890.1, Ppup152140.1, Ppup162500.1, Ppup167240.1
GO:0009135	BP	e	purine nucleoside diphosphate metabolic process	15/2424	29/10157	0.00141907	8	15	0.0574191	Ppup009900.1, Ppup026550.1, Ppup039110.1, Ppup040860.1, Ppup052600.1, Ppup074930.1, Ppup075960.1, Ppup113400.1, Ppup117160.1, Ppup119950.1, Ppup122750.1, Ppup123890.1, Ppup152140.1, Ppup162500.1, Ppup167240.1
GO:1901564	BP	e	organonitrogen compound metabolic process	655/2424	2496/10157	0.00142289	3	655	0.0574191	Ppup001710.1, Ppup001720.1, Ppup001730.1, Ppup001740.1, Ppup001800.1, Ppup001870.1, Ppup002240.1, Ppup002290.1, Ppup002450.1, Ppup002780.1, Ppup002900.1, Ppup003120.1, Ppup003130.1, Ppup003610.1, Ppup003620.1, Ppup003740.1, Ppup004080.1, Ppup004240.1, Ppup004410.1, Ppup004480.1, Ppup004570.1, Ppup005260.1, Ppup005320.1, Ppup005460.1, Ppup005470.1, Ppup005780.1, Ppup005850.1, Ppup005940.1, Ppup006…
GO:0006401	BP	e	RNA catabolic process	39/2424	102/10157	0.00143926	7	39	0.0577231	Ppup014330.1, Ppup025790.1, Ppup026790.1, Ppup027520.1, Ppup031100.1, Ppup037010.1, Ppup040010.1, Ppup040060.1, Ppup043500.1, Ppup062360.1, Ppup063920.1, Ppup064000.1, Ppup069530.1, Ppup081980.1, Ppup084660.1, Ppup085930.1, Ppup094560.1, Ppup106600.1, Ppup109030.1, Ppup111560.1, Ppup114880.1, Ppup122610.1, Ppup122820.1, Ppup130210.1, Ppup138980.1, Ppup139980.1, Ppup140390.1, Ppup141140.1, Ppup141…
GO:0046578	BP	e	regulation of Ras protein signal transduction	30/2424	74/10157	0.00144075	8	30	0.0577231	Ppup005490.1, Ppup019990.1, Ppup028100.1, Ppup031560.1, Ppup036980.1, Ppup037540.1, Ppup042910.1, Ppup048090.1, Ppup048770.1, Ppup049450.1, Ppup057830.1, Ppup060010.1, Ppup065980.1, Ppup075890.1, Ppup084510.1, Ppup086530.1, Ppup093070.1, Ppup095200.1, Ppup095470.1, Ppup098070.1, Ppup111590.1, Ppup114050.1, Ppup114420.1, Ppup115110.1, Ppup125780.1, Ppup126130.1, Ppup132140.1, Ppup144610.1, Ppup146…
GO:0022603	BP	e	regulation of anatomical structure morphogenesis	99/2424	312/10157	0.00146749	4	99	0.0585844	Ppup001870.1, Ppup002890.1, Ppup003170.1, Ppup004410.1, Ppup005470.1, Ppup005490.1, Ppup006350.1, Ppup006950.1, Ppup007690.1, Ppup017950.1, Ppup018760.1, Ppup019100.1, Ppup019160.1, Ppup022170.1, Ppup026790.1, Ppup027250.1, Ppup027410.1, Ppup028360.1, Ppup030870.1, Ppup037560.1, Ppup039090.1, Ppup042910.1, Ppup046770.1, Ppup048090.1, Ppup050410.1, Ppup052710.1, Ppup057490.1, Ppup058840.1, Ppup059…
GO:0009891	BP	e	positive regulation of biosynthetic process	196/2424	676/10157	0.00148196	5	196	0.0589514	Ppup001870.1, Ppup003620.1, Ppup004410.1, Ppup004550.1, Ppup005280.1, Ppup006210.1, Ppup006720.1, Ppup007300.1, Ppup007710.1, Ppup008030.1, Ppup008570.1, Ppup008760.1, Ppup011100.1, Ppup011120.1, Ppup014100.1, Ppup015730.1, Ppup016860.1, Ppup017930.1, Ppup017950.1, Ppup018270.1, Ppup018590.1, Ppup018630.1, Ppup018690.1, Ppup018960.1, Ppup019150.1, Ppup019460.1, Ppup019810.1, Ppup019930.1, Ppup019…
GO:1903036	BP	e	positive regulation of response to wounding	9/2424	14/10157	0.00150089	6	9	0.0591932	Ppup005490.1, Ppup022170.1, Ppup025490.1, Ppup084510.1, Ppup111240.1, Ppup120140.1, Ppup144260.1, Ppup149470.1, Ppup167630.1
GO:1902882	BP	e	regulation of response to oxidative stress	9/2424	14/10157	0.00150089	5	9	0.0591932	Ppup027280.1, Ppup027490.1, Ppup084440.1, Ppup122830.1, Ppup124080.1, Ppup134150.1, Ppup138770.1, Ppup151000.1, Ppup173320.1
GO:0043647	BP	e	inositol phosphate metabolic process	11/2424	19/10157	0.00150922	6	11	0.0591932	Ppup006440.1, Ppup020690.1, Ppup062660.1, Ppup092480.1, Ppup094070.1, Ppup111860.1, Ppup130150.1, Ppup134680.1, Ppup142860.1, Ppup156220.1, Ppup163850.1
GO:0090277	BP	e	positive regulation of peptide hormone secretion	11/2424	19/10157	0.00150922	9	11	0.0591932	Ppup010280.1, Ppup011470.1, Ppup017930.1, Ppup069310.1, Ppup075960.1, Ppup086470.1, Ppup108180.1, Ppup109260.1, Ppup137390.1, Ppup138910.1, Ppup165290.1
GO:0030336	BP	e	negative regulation of cell migration	19/2424	41/10157	0.00152494	7	19	0.0596006	Ppup005490.1, Ppup014250.1, Ppup025700.1, Ppup026310.1, Ppup050970.1, Ppup057310.1, Ppup057830.1, Ppup075760.1, Ppup076820.1, Ppup085360.1, Ppup093860.1, Ppup111590.1, Ppup116890.1, Ppup127050.1, Ppup132570.1, Ppup138480.1, Ppup145860.1, Ppup146370.1, Ppup165990.1
GO:0051254	BP	e	positive regulation of RNA metabolic process	176/2424	600/10157	0.001556	7	176	0.0606027	Ppup001870.1, Ppup003620.1, Ppup004410.1, Ppup004550.1, Ppup005280.1, Ppup006210.1, Ppup007300.1, Ppup007710.1, Ppup008030.1, Ppup008570.1, Ppup008760.1, Ppup011100.1, Ppup014100.1, Ppup017950.1, Ppup018270.1, Ppup018590.1, Ppup018630.1, Ppup018690.1, Ppup018960.1, Ppup019150.1, Ppup019460.1, Ppup019810.1, Ppup019930.1, Ppup019950.1, Ppup020310.1, Ppup021150.1, Ppup021470.1, Ppup023680.1, Ppup023…
GO:0006865	BP	e	amino acid transport	25/2424	58/10157	0.00163041	8	25	0.0626281	Ppup004080.1, Ppup004420.1, Ppup007130.1, Ppup024330.1, Ppup025130.1, Ppup028060.1, Ppup031080.1, Ppup031630.1, Ppup063970.1, Ppup077110.1, Ppup085610.1, Ppup086080.1, Ppup106580.1, Ppup107280.1, Ppup114070.1, Ppup127030.1, Ppup130380.1, Ppup132870.1, Ppup136740.1, Ppup138970.1, Ppup141890.1, Ppup143690.1, Ppup153300.1, Ppup154630.1, Ppup168300.1
GO:0009895	BP	e	negative regulation of catabolic process	35/2424	90/10157	0.00167426	5	35	0.0640921	Ppup001710.1, Ppup011260.1, Ppup015890.1, Ppup020310.1, Ppup020690.1, Ppup021300.1, Ppup025910.1, Ppup026550.1, Ppup026630.1, Ppup027120.1, Ppup027280.1, Ppup029350.1, Ppup037560.1, Ppup038210.1, Ppup040060.1, Ppup046570.1, Ppup046770.1, Ppup052760.1, Ppup076900.1, Ppup077340.1, Ppup099550.1, Ppup111390.1, Ppup116700.1, Ppup125780.1, Ppup127830.1, Ppup130220.1, Ppup140390.1, Ppup140970.1, Ppup141…
GO:0016458	BP	e	gene silencing	37/2424	97/10157	0.0016824	7	37	0.0641837	Ppup013200.1, Ppup018600.1, Ppup018870.1, Ppup021070.1, Ppup022280.1, Ppup025760.1, Ppup027520.1, Ppup039420.1, Ppup039960.1, Ppup040060.1, Ppup040370.1, Ppup040380.1, Ppup050210.1, Ppup050410.1, Ppup053830.1, Ppup054240.1, Ppup064000.1, Ppup084660.1, Ppup086780.1, Ppup093510.1, Ppup104340.1, Ppup108160.1, Ppup112450.1, Ppup123330.1, Ppup123820.1, Ppup127650.1, Ppup139070.1, Ppup139080.1, Ppup140…
GO:0016311	BP	e	dephosphorylation	31/2424	77/10157	0.00174327	5	31	0.0662681	Ppup006440.1, Ppup008760.1, Ppup010210.1, Ppup014250.1, Ppup020690.1, Ppup024690.1, Ppup025970.1, Ppup027240.1, Ppup028400.1, Ppup030870.1, Ppup033260.1, Ppup050270.1, Ppup050810.1, Ppup062600.1, Ppup070550.1, Ppup070580.1, Ppup075750.1, Ppup086620.1, Ppup094070.1, Ppup095740.1, Ppup099800.1, Ppup110470.1, Ppup115930.1, Ppup123560.1, Ppup125780.1, Ppup126560.1, Ppup134680.1, Ppup139130.1, Ppup145…
GO:0051241	BP	e	negative regulation of multicellular organismal process	87/2424	270/10157	0.00178894	4	87	0.0673291	Ppup003170.1, Ppup004410.1, Ppup005320.1, Ppup005490.1, Ppup011120.1, Ppup014250.1, Ppup018960.1, Ppup019150.1, Ppup020310.1, Ppup020690.1, Ppup024220.1, Ppup024730.1, Ppup025690.1, Ppup026440.1, Ppup026790.1, Ppup026960.1, Ppup027280.1, Ppup027410.1, Ppup027690.1, Ppup028360.1, Ppup030870.1, Ppup035800.1, Ppup035960.1, Ppup039090.1, Ppup043150.1, Ppup045480.1, Ppup049000.1, Ppup057750.1, Ppup057…
GO:0048589	BP	e	developmental growth	58/2424	168/10157	0.00180344	2	58	0.0676473	Ppup003740.1, Ppup003910.1, Ppup004410.1, Ppup005470.1, Ppup006660.1, Ppup006950.1, Ppup008830.1, Ppup022170.1, Ppup024570.1, Ppup027500.1, Ppup028360.1, Ppup028600.1, Ppup030870.1, Ppup031080.1, Ppup035600.1, Ppup036080.1, Ppup039560.1, Ppup043580.1, Ppup045860.1, Ppup046770.1, Ppup049480.1, Ppup058220.1, Ppup058400.1, Ppup062600.1, Ppup063260.1, Ppup071370.1, Ppup073000.1, Ppup074880.1, Ppup077…
GO:0007610	BP	e	behavior	114/2424	369/10157	0.00181775	1	114	0.0679557	Ppup001870.1, Ppup004150.1, Ppup005470.1, Ppup006360.1, Ppup006440.1, Ppup009470.1, Ppup010280.1, Ppup017930.1, Ppup018140.1, Ppup018590.1, Ppup018600.1, Ppup021350.1, Ppup021710.1, Ppup024570.1, Ppup025100.1, Ppup025880.1, Ppup027280.1, Ppup027690.1, Ppup037560.1, Ppup038210.1, Ppup038960.1, Ppup039560.1, Ppup040750.1, Ppup040930.1, Ppup043580.1, Ppup044730.1, Ppup045860.1, Ppup050410.1, Ppup055…
GO:0006757	BP	e	ATP generation from ADP	12/2424	22/10157	0.0018551	11	12	0.0682116	Ppup009900.1, Ppup026550.1, Ppup039110.1, Ppup040860.1, Ppup074930.1, Ppup075960.1, Ppup117160.1, Ppup119950.1, Ppup123890.1, Ppup152140.1, Ppup162500.1, Ppup167240.1
GO:0006536	BP	e	glutamate metabolic process	12/2424	22/10157	0.0018551	9	12	0.0682116	Ppup010470.1, Ppup022030.1, Ppup029370.1, Ppup055840.1, Ppup085610.1, Ppup125740.1, Ppup145850.1, Ppup156530.1, Ppup160680.1, Ppup161150.1, Ppup168100.1, Ppup176440.1
GO:0006096	BP	e	glycolytic process	12/2424	22/10157	0.0018551	12	12	0.0682116	Ppup009900.1, Ppup026550.1, Ppup039110.1, Ppup040860.1, Ppup074930.1, Ppup075960.1, Ppup117160.1, Ppup119950.1, Ppup123890.1, Ppup152140.1, Ppup162500.1, Ppup167240.1
GO:0060537	BP	e	muscle tissue development	12/2424	22/10157	0.0018551	4	12	0.0682116	Ppup005470.1, Ppup006210.1, Ppup018590.1, Ppup022260.1, Ppup028360.1, Ppup043550.1, Ppup043740.1, Ppup054060.1, Ppup074720.1, Ppup124100.1, Ppup132570.1, Ppup156210.1
GO:0098661	BP	e	inorganic anion transmembrane transport	12/2424	22/10157	0.0018551	7	12	0.0682116	Ppup002250.1, Ppup020100.1, Ppup025890.1, Ppup040030.1, Ppup046230.1, Ppup053760.1, Ppup071180.1, Ppup076180.1, Ppup085610.1, Ppup106580.1, Ppup109260.1, Ppup122620.1
GO:0080134	BP	e	regulation of response to stress	124/2424	407/10157	0.00198213	4	124	0.0723187	Ppup001720.1, Ppup003100.1, Ppup005470.1, Ppup005490.1, Ppup008700.1, Ppup008760.1, Ppup009230.1, Ppup010330.1, Ppup011120.1, Ppup017410.1, Ppup019220.1, Ppup020080.1, Ppup020500.1, Ppup021150.1, Ppup022030.1, Ppup022170.1, Ppup024570.1, Ppup025490.1, Ppup026660.1, Ppup026960.1, Ppup027200.1, Ppup027280.1, Ppup027490.1, Ppup027500.1, Ppup027520.1, Ppup028600.1, Ppup028810.1, Ppup035940.1, Ppup037…
GO:0010508	BP	e	positive regulation of autophagy	20/2424	44/10157	0.00200509	7	20	0.0723187	Ppup021300.1, Ppup025910.1, Ppup027280.1, Ppup030870.1, Ppup049570.1, Ppup057460.1, Ppup075680.1, Ppup076900.1, Ppup095370.1, Ppup101240.1, Ppup110950.1, Ppup116340.1, Ppup134150.1, Ppup135110.1, Ppup140310.1, Ppup145680.1, Ppup161610.1, Ppup169690.1, Ppup171790.1, Ppup174280.1
GO:1902475	BP	e	L-alpha-amino acid transmembrane transport	8/2424	12/10157	0.00200562	10	8	0.0723187	Ppup004420.1, Ppup077110.1, Ppup085610.1, Ppup086080.1, Ppup106580.1, Ppup130380.1, Ppup141890.1, Ppup154630.1
GO:1900407	BP	e	regulation of cellular response to oxidative stress	8/2424	12/10157	0.00200562	6	8	0.0723187	Ppup027280.1, Ppup027490.1, Ppup084440.1, Ppup122830.1, Ppup124080.1, Ppup138770.1, Ppup151000.1, Ppup173320.1
GO:0034375	BP	e	high-density lipoprotein particle remodeling	8/2424	12/10157	0.00200562	8	8	0.0723187	Ppup043200.1, Ppup047250.1, Ppup060140.1, Ppup104600.1, Ppup109420.1, Ppup109430.1, Ppup130100.1, Ppup162270.1
GO:0050885	BP	e	neuromuscular process controlling balance	8/2424	12/10157	0.00200562	5	8	0.0723187	Ppup001870.1, Ppup004550.1, Ppup010280.1, Ppup038960.1, Ppup085610.1, Ppup098040.1, Ppup106290.1, Ppup173320.1
GO:0019538	BP	e	protein metabolic process	480/2424	1797/10157	0.00205856	4	480	0.0737519	Ppup001710.1, Ppup001720.1, Ppup001730.1, Ppup001800.1, Ppup001870.1, Ppup002240.1, Ppup002450.1, Ppup002900.1, Ppup003120.1, Ppup003610.1, Ppup003620.1, Ppup004080.1, Ppup004240.1, Ppup004410.1, Ppup004570.1, Ppup005260.1, Ppup005320.1, Ppup005470.1, Ppup005780.1, Ppup005940.1, Ppup006490.1, Ppup006830.1, Ppup008630.1, Ppup008730.1, Ppup008760.1, Ppup008980.1, Ppup009730.1, Ppup010280.1, Ppup010…
GO:0006090	BP	e	pyruvate metabolic process	17/2424	35/10157	0.00208781	7	17	0.0743226	Ppup009900.1, Ppup026550.1, Ppup039110.1, Ppup040860.1, Ppup074370.1, Ppup074930.1, Ppup075960.1, Ppup083190.1, Ppup096400.1, Ppup117160.1, Ppup119950.1, Ppup123890.1, Ppup131510.1, Ppup138850.1, Ppup152140.1, Ppup162500.1, Ppup167240.1
GO:0031062	BP	e	positive regulation of histone methylation	10/2424	17/10157	0.00211582	10	10	0.0743226	Ppup019810.1, Ppup035890.1, Ppup037880.1, Ppup039960.1, Ppup049720.1, Ppup061660.1, Ppup108340.1, Ppup123820.1, Ppup133560.1, Ppup176270.1
GO:1902369	BP	e	negative regulation of RNA catabolic process	10/2424	17/10157	0.00211582	8	10	0.0743226	Ppup015890.1, Ppup020310.1, Ppup027120.1, Ppup040060.1, Ppup076900.1, Ppup111390.1, Ppup140390.1, Ppup146680.1, Ppup154550.1, Ppup168420.1
GO:0045475	BP	e	locomotor rhythm	10/2424	17/10157	0.00211582	4	10	0.0743226	Ppup018590.1, Ppup040750.1, Ppup040930.1, Ppup045860.1, Ppup058840.1, Ppup064000.1, Ppup104550.1, Ppup109360.1, Ppup143520.1, Ppup144280.1
GO:0015804	BP	e	neutral amino acid transport	10/2424	17/10157	0.00211582	9	10	0.0743226	Ppup004420.1, Ppup028060.1, Ppup031630.1, Ppup063970.1, Ppup106580.1, Ppup114070.1, Ppup132870.1, Ppup136740.1, Ppup141890.1, Ppup153300.1
GO:0032024	BP	e	positive regulation of insulin secretion	10/2424	17/10157	0.00211582	10	10	0.0743226	Ppup010280.1, Ppup011470.1, Ppup017930.1, Ppup069310.1, Ppup075960.1, Ppup086470.1, Ppup109260.1, Ppup137390.1, Ppup138910.1, Ppup165290.1
GO:0046031	BP	e	ADP metabolic process	14/2424	27/10157	0.00212768	10	14	0.0743226	Ppup009900.1, Ppup026550.1, Ppup039110.1, Ppup040860.1, Ppup052600.1, Ppup074930.1, Ppup075960.1, Ppup113400.1, Ppup117160.1, Ppup119950.1, Ppup123890.1, Ppup152140.1, Ppup162500.1, Ppup167240.1
GO:1901879	BP	e	regulation of protein depolymerization	14/2424	27/10157	0.00212768	6	14	0.0743226	Ppup009190.1, Ppup021210.1, Ppup043440.1, Ppup064390.1, Ppup087280.1, Ppup106040.1, Ppup114260.1, Ppup120140.1, Ppup126790.1, Ppup142060.1, Ppup150900.1, Ppup151290.1, Ppup165030.1, Ppup167630.1
GO:0031330	BP	e	negative regulation of cellular catabolic process	31/2424	79/10157	0.00214971	6	31	0.0746257	Ppup001710.1, Ppup011260.1, Ppup015890.1, Ppup020310.1, Ppup020690.1, Ppup021300.1, Ppup025910.1, Ppup026550.1, Ppup027120.1, Ppup027280.1, Ppup029350.1, Ppup037560.1, Ppup038210.1, Ppup040060.1, Ppup046570.1, Ppup046770.1, Ppup076900.1, Ppup077340.1, Ppup099550.1, Ppup111390.1, Ppup116700.1, Ppup127830.1, Ppup130220.1, Ppup140390.1, Ppup141670.1, Ppup146680.1, Ppup154550.1, Ppup160690.1, Ppup161…
GO:0007613	BP	e	memory	31/2424	79/10157	0.00214971	6	31	0.0746257	Ppup004150.1, Ppup006360.1, Ppup009470.1, Ppup017930.1, Ppup027690.1, Ppup038960.1, Ppup043580.1, Ppup045860.1, Ppup058840.1, Ppup064850.1, Ppup064880.1, Ppup075230.1, Ppup086620.1, Ppup095850.1, Ppup096260.1, Ppup098040.1, Ppup101280.1, Ppup123780.1, Ppup127980.1, Ppup133890.1, Ppup135080.1, Ppup135110.1, Ppup137460.1, Ppup139640.1, Ppup143530.1, Ppup145680.1, Ppup147780.1, Ppup150610.1, Ppup152…
GO:1905952	BP	e	regulation of lipid localization	23/2424	54/10157	0.0021617	4	23	0.0748096	Ppup005940.1, Ppup017930.1, Ppup024580.1, Ppup027250.1, Ppup037880.1, Ppup040660.1, Ppup043200.1, Ppup047250.1, Ppup054230.1, Ppup060140.1, Ppup062600.1, Ppup075760.1, Ppup082260.1, Ppup104600.1, Ppup109420.1, Ppup109430.1, Ppup120280.1, Ppup130100.1, Ppup133890.1, Ppup137390.1, Ppup140970.1, Ppup140980.1, Ppup162270.1
GO:0010647	BP	e	positive regulation of cell communication	145/2424	486/10157	0.00221588	5	145	0.0764477	Ppup001710.1, Ppup001800.1, Ppup002780.1, Ppup004150.1, Ppup004410.1, Ppup004550.1, Ppup005280.1, Ppup005490.1, Ppup005940.1, Ppup006490.1, Ppup006500.1, Ppup009190.1, Ppup009830.1, Ppup010210.1, Ppup010280.1, Ppup010900.1, Ppup011100.1, Ppup011470.1, Ppup013130.1, Ppup017930.1, Ppup019150.1, Ppup019460.1, Ppup019930.1, Ppup022170.1, Ppup024570.1, Ppup025100.1, Ppup026790.1, Ppup026960.1, Ppup027…
GO:0034097	BP	e	response to cytokine	38/2424	102/10157	0.00226771	4	38	0.0775183	Ppup002480.1, Ppup003740.1, Ppup019460.1, Ppup021090.1, Ppup022030.1, Ppup025100.1, Ppup026790.1, Ppup035800.1, Ppup038890.1, Ppup043580.1, Ppup049720.1, Ppup053150.1, Ppup075430.1, Ppup083660.1, Ppup086420.1, Ppup093050.1, Ppup094070.1, Ppup094610.1, Ppup110010.1, Ppup112100.1, Ppup112420.1, Ppup113130.1, Ppup115100.1, Ppup122670.1, Ppup122870.1, Ppup123000.1, Ppup123010.1, Ppup123820.1, Ppup124…
GO:0034329	BP	e	cell junction assembly	38/2424	102/10157	0.00226771	5	38	0.0775183	Ppup005970.1, Ppup008830.1, Ppup010280.1, Ppup024570.1, Ppup026370.1, Ppup041140.1, Ppup042910.1, Ppup055840.1, Ppup057830.1, Ppup074880.1, Ppup083090.1, Ppup087280.1, Ppup098040.1, Ppup101280.1, Ppup103510.1, Ppup103750.1, Ppup109360.1, Ppup112480.1, Ppup115170.1, Ppup123780.1, Ppup125740.1, Ppup127350.1, Ppup133260.1, Ppup134010.1, Ppup137460.1, Ppup137670.1, Ppup137940.1, Ppup139130.1, Ppup144…
GO:0009605	BP	e	response to external stimulus	188/2424	650/10157	0.00230538	2	188	0.0785656	Ppup002240.1, Ppup003740.1, Ppup003830.1, Ppup004450.1, Ppup005940.1, Ppup006950.1, Ppup008030.1, Ppup008570.1, Ppup009440.1, Ppup009730.1, Ppup010940.1, Ppup011620.1, Ppup012590.1, Ppup013130.1, Ppup016190.1, Ppup017930.1, Ppup018590.1, Ppup019150.1, Ppup019220.1, Ppup020730.1, Ppup021150.1, Ppup021300.1, Ppup022030.1, Ppup022170.1, Ppup022290.1, Ppup024330.1, Ppup024560.1, Ppup026000.1, Ppup026…
GO:0019637	BP	e	organophosphate metabolic process	156/2424	528/10157	0.00231636	4	156	0.0787	Ppup001740.1, Ppup001870.1, Ppup002290.1, Ppup003740.1, Ppup004080.1, Ppup004450.1, Ppup004480.1, Ppup005210.1, Ppup005850.1, Ppup006440.1, Ppup009850.1, Ppup009900.1, Ppup010210.1, Ppup011470.1, Ppup015780.1, Ppup016890.1, Ppup017930.1, Ppup020690.1, Ppup022260.1, Ppup024220.1, Ppup026430.1, Ppup026550.1, Ppup027260.1, Ppup028300.1, Ppup028400.1, Ppup029370.1, Ppup030030.1, Ppup033140.1, Ppup033…
GO:0006897	BP	e	endocytosis	54/2424	156/10157	0.0023316	5	54	0.0787267	Ppup003030.1, Ppup003070.1, Ppup003230.1, Ppup004080.1, Ppup004410.1, Ppup004540.1, Ppup006040.1, Ppup006440.1, Ppup006490.1, Ppup010280.1, Ppup012590.1, Ppup013930.1, Ppup018840.1, Ppup027410.1, Ppup037330.1, Ppup039450.1, Ppup048090.1, Ppup050380.1, Ppup050680.1, Ppup056640.1, Ppup057970.1, Ppup063370.1, Ppup063520.1, Ppup065980.1, Ppup076300.1, Ppup076850.1, Ppup085760.1, Ppup092470.1, Ppup093…
GO:0048511	BP	e	rhythmic process	46/2424	129/10157	0.0024369	1	46	0.0815559	Ppup001800.1, Ppup003620.1, Ppup003740.1, Ppup004410.1, Ppup008760.1, Ppup010190.1, Ppup014260.1, Ppup018590.1, Ppup019150.1, Ppup019460.1, Ppup019930.1, Ppup026960.1, Ppup037010.1, Ppup037330.1, Ppup037540.1, Ppup040750.1, Ppup040930.1, Ppup045860.1, Ppup058370.1, Ppup058840.1, Ppup059960.1, Ppup064000.1, Ppup064880.1, Ppup075260.1, Ppup075380.1, Ppup091970.1, Ppup095740.1, Ppup104550.1, Ppup109…
GO:0032006	BP	e	regulation of TOR signaling	24/2424	57/10157	0.00259498	7	24	0.0865235	Ppup005470.1, Ppup009730.1, Ppup010210.1, Ppup016190.1, Ppup018870.1, Ppup021300.1, Ppup026960.1, Ppup027280.1, Ppup030870.1, Ppup035420.1, Ppup035600.1, Ppup044250.1, Ppup046770.1, Ppup057830.1, Ppup075710.1, Ppup092000.1, Ppup116700.1, Ppup134150.1, Ppup138770.1, Ppup139120.1, Ppup140310.1, Ppup149590.1, Ppup154630.1, Ppup171790.1
GO:0043981	BP	e	histone H4-K5 acetylation	7/2424	10/10157	0.00261629	13	7	0.0865235	Ppup008730.1, Ppup018690.1, Ppup021480.1, Ppup094820.1, Ppup105670.1, Ppup174340.1, Ppup176270.1
GO:0048013	BP	e	ephrin receptor signaling pathway	7/2424	10/10157	0.00261629	8	7	0.0865235	Ppup042910.1, Ppup052710.1, Ppup062600.1, Ppup075890.1, Ppup114300.1, Ppup132140.1, Ppup171780.1
GO:0043982	BP	e	histone H4-K8 acetylation	7/2424	10/10157	0.00261629	13	7	0.0865235	Ppup008730.1, Ppup018690.1, Ppup021480.1, Ppup094820.1, Ppup105670.1, Ppup174340.1, Ppup176270.1
GO:0050905	BP	e	neuromuscular process	11/2424	20/10157	0.00263509	4	11	0.0866325	Ppup001870.1, Ppup004550.1, Ppup005470.1, Ppup010280.1, Ppup038960.1, Ppup085610.1, Ppup090610.1, Ppup098040.1, Ppup106290.1, Ppup137940.1, Ppup173320.1
GO:0006821	BP	e	chloride transport	11/2424	20/10157	0.00263509	7	11	0.0866325	Ppup002250.1, Ppup019440.1, Ppup020100.1, Ppup048030.1, Ppup053760.1, Ppup071180.1, Ppup076180.1, Ppup085610.1, Ppup106580.1, Ppup109260.1, Ppup122620.1
GO:0031110	BP	e	regulation of microtubule polymerization or depolymerization	15/2424	31/10157	0.00270858	8	15	0.0882697	Ppup009190.1, Ppup025690.1, Ppup043440.1, Ppup077190.1, Ppup080260.1, Ppup086470.1, Ppup086510.1, Ppup087280.1, Ppup106040.1, Ppup114260.1, Ppup120140.1, Ppup123810.1, Ppup140100.1, Ppup151290.1, Ppup167630.1
GO:1902275	BP	e	regulation of chromatin organization	39/2424	106/10157	0.00271929	7	39	0.088361	Ppup001710.1, Ppup005470.1, Ppup011260.1, Ppup016230.1, Ppup018270.1, Ppup019810.1, Ppup033420.1, Ppup035070.1, Ppup035890.1, Ppup037880.1, Ppup039960.1, Ppup042410.1, Ppup043580.1, Ppup049720.1, Ppup055320.1, Ppup057830.1, Ppup058370.1, Ppup058840.1, Ppup061660.1, Ppup075380.1, Ppup080180.1, Ppup091190.1, Ppup091670.1, Ppup103700.1, Ppup106650.1, Ppup108340.1, Ppup112530.1, Ppup122630.1, Ppup123…
GO:0009416	BP	e	response to light stimulus	44/2424	123/10157	0.00275285	4	44	0.0891925	Ppup002240.1, Ppup002900.1, Ppup004150.1, Ppup004450.1, Ppup019150.1, Ppup019460.1, Ppup021090.1, Ppup025100.1, Ppup030870.1, Ppup035800.1, Ppup037540.1, Ppup039790.1, Ppup040660.1, Ppup052220.1, Ppup052820.1, Ppup062660.1, Ppup064880.1, Ppup079870.1, Ppup082200.1, Ppup085610.1, Ppup086080.1, Ppup096580.1, Ppup099550.1, Ppup100850.1, Ppup104550.1, Ppup109360.1, Ppup115100.1, Ppup123620.1, Ppup125…
GO:0070482	BP	e	response to oxygen levels	28/2424	70/10157	0.0027799	3	28	0.0898085	Ppup009230.1, Ppup009340.1, Ppup017950.1, Ppup027280.1, Ppup037880.1, Ppup041520.1, Ppup043150.1, Ppup046850.1, Ppup047070.1, Ppup048420.1, Ppup052760.1, Ppup054410.1, Ppup065950.1, Ppup081850.1, Ppup094510.1, Ppup101240.1, Ppup122830.1, Ppup122880.1, Ppup124080.1, Ppup126660.1, Ppup137540.1, Ppup141850.1, Ppup143800.1, Ppup144410.1, Ppup152000.1, Ppup156210.1, Ppup161610.1, Ppup165090.1
GO:0051336	BP	e	regulation of hydrolase activity	75/2424	231/10157	0.00289771	4	75	0.0929229	Ppup003170.1, Ppup006810.1, Ppup007260.1, Ppup010390.1, Ppup011300.1, Ppup012830.1, Ppup018860.1, Ppup020270.1, Ppup022290.1, Ppup026360.1, Ppup027050.1, Ppup027280.1, Ppup027780.1, Ppup029350.1, Ppup036980.1, Ppup037900.1, Ppup041140.1, Ppup042910.1, Ppup043550.1, Ppup044250.1, Ppup049760.1, Ppup052710.1, Ppup053660.1, Ppup057830.1, Ppup058370.1, Ppup059100.1, Ppup061620.1, Ppup061710.1, Ppup063…
GO:0032880	BP	e	regulation of protein localization	101/2424	326/10157	0.00290124	4	101	0.0929229	Ppup002780.1, Ppup003910.1, Ppup009830.1, Ppup010280.1, Ppup011470.1, Ppup014360.1, Ppup015730.1, Ppup017930.1, Ppup018600.1, Ppup024510.1, Ppup025880.1, Ppup026440.1, Ppup026960.1, Ppup027680.1, Ppup029460.1, Ppup030870.1, Ppup035600.1, Ppup037330.1, Ppup038210.1, Ppup043200.1, Ppup044000.1, Ppup047070.1, Ppup048770.1, Ppup049390.1, Ppup050170.1, Ppup050680.1, Ppup050970.1, Ppup053460.1, Ppup057…
GO:2000146	BP	e	negative regulation of cell motility	19/2424	42/10157	0.0029315	6	19	0.0936237	Ppup005490.1, Ppup014250.1, Ppup025700.1, Ppup026310.1, Ppup050970.1, Ppup057310.1, Ppup057830.1, Ppup075760.1, Ppup076820.1, Ppup085360.1, Ppup093860.1, Ppup111590.1, Ppup116890.1, Ppup127050.1, Ppup132570.1, Ppup138480.1, Ppup145860.1, Ppup146370.1, Ppup165990.1
GO:0034367	BP	e	protein-containing complex remodeling	9/2424	15/10157	0.0029602	5	9	0.0937368	Ppup043200.1, Ppup047250.1, Ppup060140.1, Ppup104600.1, Ppup109420.1, Ppup109430.1, Ppup130100.1, Ppup162270.1, Ppup173970.1
GO:0018108	BP	e	peptidyl-tyrosine phosphorylation	9/2424	15/10157	0.0029602	9	9	0.0937368	Ppup036080.1, Ppup058840.1, Ppup071370.1, Ppup077440.1, Ppup086990.1, Ppup101280.1, Ppup109280.1, Ppup116900.1, Ppup174910.1
GO:0010390	BP	e	histone monoubiquitination	9/2424	15/10157	0.0029602	11	9	0.0937368	Ppup013200.1, Ppup025910.1, Ppup039050.1, Ppup039790.1, Ppup046570.1, Ppup128890.1, Ppup133560.1, Ppup146820.1, Ppup161000.1
GO:0051240	BP	e	positive regulation of multicellular organismal process	124/2424	412/10157	0.00312932	4	124	0.0981139	Ppup001800.1, Ppup002780.1, Ppup003170.1, Ppup003910.1, Ppup004150.1, Ppup005280.1, Ppup006950.1, Ppup006990.1, Ppup008680.1, Ppup010280.1, Ppup018680.1, Ppup018760.1, Ppup019930.1, Ppup021150.1, Ppup024220.1, Ppup024510.1, Ppup024560.1, Ppup024570.1, Ppup025100.1, Ppup026960.1, Ppup027050.1, Ppup030870.1, Ppup036080.1, Ppup037560.1, Ppup037880.1, Ppup039090.1, Ppup040580.1, Ppup040760.1, Ppup043…
GO:0036302	BP	e	atrioventricular canal development	4/2424	4/10157	0.0032378	3	4	0.0981139	Ppup044420.1, Ppup062600.1, Ppup100570.1, Ppup144880.1
GO:0046321	BP	e	positive regulation of fatty acid oxidation	4/2424	4/10157	0.0032378	8	4	0.0981139	Ppup005940.1, Ppup011120.1, Ppup025880.1, Ppup052580.1
GO:0048312	BP	e	intracellular distribution of mitochondria	4/2424	4/10157	0.0032378	7	4	0.0981139	Ppup043580.1, Ppup110920.1, Ppup140190.1, Ppup176270.1
GO:0006537	BP	e	glutamate biosynthetic process	4/2424	4/10157	0.0032378	10	4	0.0981139	Ppup085610.1, Ppup145850.1, Ppup156530.1, Ppup176440.1
GO:0099170	BP	e	postsynaptic modulation of chemical synaptic transmission	4/2424	4/10157	0.0032378	7	4	0.0981139	Ppup049010.1, Ppup123220.1, Ppup137540.1, Ppup142660.1
GO:0002115	BP	e	store-operated calcium entry	4/2424	4/10157	0.0032378	9	4	0.0981139	Ppup075540.1, Ppup097670.1, Ppup109830.1, Ppup109840.1
GO:0010635	BP	e	regulation of mitochondrial fusion	4/2424	4/10157	0.0032378	7	4	0.0981139	Ppup062320.1, Ppup075690.1, Ppup101240.1, Ppup141950.1
GO:0045175	BP	e	basal protein localization	4/2424	4/10157	0.0032378	4	4	0.0981139	Ppup109360.1, Ppup112420.1, Ppup122440.1, Ppup137460.1
GO:0046037	BP	e	GMP metabolic process	4/2424	4/10157	0.0032378	10	4	0.0981139	Ppup050580.1, Ppup105390.1, Ppup122750.1, Ppup122800.1
GO:1901031	BP	e	regulation of response to reactive oxygen species	6/2424	8/10157	0.00326539	6	6	0.0981139	Ppup027490.1, Ppup084440.1, Ppup124080.1, Ppup134150.1, Ppup138770.1, Ppup173320.1
GO:0072499	BP	e	photoreceptor cell axon guidance	6/2424	8/10157	0.00326539	5	6	0.0981139	Ppup009190.1, Ppup071370.1, Ppup114050.1, Ppup142060.1, Ppup150610.1, Ppup166580.1
GO:0010866	BP	e	regulation of triglyceride biosynthetic process	6/2424	8/10157	0.00326539	7	6	0.0981139	Ppup040660.1, Ppup047250.1, Ppup060140.1, Ppup075750.1, Ppup153110.1, Ppup162270.1
GO:0043457	BP	e	regulation of cellular respiration	6/2424	8/10157	0.00326539	6	6	0.0981139	Ppup027490.1, Ppup052760.1, Ppup062450.1, Ppup063940.1, Ppup101240.1, Ppup133270.1
GO:0010828	BP	e	positive regulation of glucose transmembrane transport	6/2424	8/10157	0.00326539	7	6	0.0981139	Ppup036980.1, Ppup062600.1, Ppup075760.1, Ppup086080.1, Ppup103510.1, Ppup106330.1
GO:0099177	BP	e	regulation of trans-synaptic signaling	54/2424	158/10157	0.00337647	5	54	0.100462	Ppup004150.1, Ppup007130.1, Ppup008830.1, Ppup009190.1, Ppup010280.1, Ppup010330.1, Ppup011620.1, Ppup013930.1, Ppup017930.1, Ppup018140.1, Ppup018680.1, Ppup019200.1, Ppup020690.1, Ppup022290.1, Ppup025100.1, Ppup037900.1, Ppup038420.1, Ppup038960.1, Ppup043580.1, Ppup048770.1, Ppup049010.1, Ppup050970.1, Ppup052260.1, Ppup052710.1, Ppup054430.1, Ppup064880.1, Ppup075410.1, Ppup076820.1, Ppup085…
GO:0050804	BP	e	modulation of chemical synaptic transmission	54/2424	158/10157	0.00337647	6	54	0.100462	Ppup004150.1, Ppup007130.1, Ppup008830.1, Ppup009190.1, Ppup010280.1, Ppup010330.1, Ppup011620.1, Ppup013930.1, Ppup017930.1, Ppup018140.1, Ppup018680.1, Ppup019200.1, Ppup020690.1, Ppup022290.1, Ppup025100.1, Ppup037900.1, Ppup038420.1, Ppup038960.1, Ppup043580.1, Ppup048770.1, Ppup049010.1, Ppup050970.1, Ppup052260.1, Ppup052710.1, Ppup054430.1, Ppup064880.1, Ppup075410.1, Ppup076820.1, Ppup085…
GO:0007015	BP	e	actin filament organization	38/2424	103/10157	0.0033793	5	38	0.100462	Ppup004200.1, Ppup016190.1, Ppup017690.1, Ppup020360.1, Ppup020370.1, Ppup021210.1, Ppup022170.1, Ppup026370.1, Ppup027050.1, Ppup042150.1, Ppup059740.1, Ppup063140.1, Ppup063520.1, Ppup064390.1, Ppup086470.1, Ppup087330.1, Ppup090780.1, Ppup090820.1, Ppup091240.1, Ppup092160.1, Ppup092470.1, Ppup101280.1, Ppup103510.1, Ppup110670.1, Ppup110820.1, Ppup119510.1, Ppup122680.1, Ppup126130.1, Ppup126…
GO:0046777	BP	e	protein autophosphorylation	27/2424	67/10157	0.00353038	8	27	0.104398	Ppup009730.1, Ppup018760.1, Ppup021150.1, Ppup025490.1, Ppup026440.1, Ppup027810.1, Ppup028810.1, Ppup030870.1, Ppup035940.1, Ppup036080.1, Ppup058840.1, Ppup071370.1, Ppup077440.1, Ppup081980.1, Ppup083740.1, Ppup086990.1, Ppup093660.1, Ppup095370.1, Ppup100660.1, Ppup101280.1, Ppup110950.1, Ppup122670.1, Ppup125290.1, Ppup126170.1, Ppup133890.1, Ppup174740.1, Ppup174910.1
GO:0007030	BP	e	Golgi organization	27/2424	67/10157	0.00353038	5	27	0.104398	Ppup001800.1, Ppup003990.1, Ppup006390.1, Ppup007260.1, Ppup020770.1, Ppup027780.1, Ppup028260.1, Ppup042910.1, Ppup044000.1, Ppup046930.1, Ppup050340.1, Ppup057910.1, Ppup058320.1, Ppup084510.1, Ppup090760.1, Ppup096970.1, Ppup107840.1, Ppup110550.1, Ppup111240.1, Ppup125290.1, Ppup141230.1, Ppup145250.1, Ppup145260.1, Ppup151260.1, Ppup160900.1, Ppup166680.1, Ppup167630.1
GO:0009612	BP	e	response to mechanical stimulus	16/2424	34/10157	0.00367961	3	16	0.108524	Ppup024560.1, Ppup052530.1, Ppup055840.1, Ppup062600.1, Ppup065840.1, Ppup071180.1, Ppup081850.1, Ppup086470.1, Ppup086960.1, Ppup091760.1, Ppup099860.1, Ppup101240.1, Ppup115160.1, Ppup123000.1, Ppup137940.1, Ppup140860.1
GO:0070863	BP	e	positive regulation of protein exit from endoplasmic reticulum	5/2424	6/10157	0.00371099	9	5	0.108564	Ppup094530.1, Ppup141160.1, Ppup145250.1, Ppup145260.1, Ppup172490.1
GO:0043063	BP	e	intercellular bridge organization	5/2424	6/10157	0.00371099	5	5	0.108564	Ppup053540.1, Ppup086990.1, Ppup101280.1, Ppup139640.1, Ppup160440.1
GO:0030725	BP	e	germline ring canal formation	5/2424	6/10157	0.00371099	6	5	0.108564	Ppup053540.1, Ppup086990.1, Ppup101280.1, Ppup139640.1, Ppup160440.1
GO:0032370	BP	e	positive regulation of lipid transport	10/2424	18/10157	0.00374893	6	10	0.108564	Ppup005940.1, Ppup017930.1, Ppup037880.1, Ppup043200.1, Ppup054230.1, Ppup082260.1, Ppup104600.1, Ppup109420.1, Ppup109430.1, Ppup130100.1
GO:0045887	BP	e	positive regulation of synaptic growth at neuromuscular junction	10/2424	18/10157	0.00374893	8	10	0.108564	Ppup008680.1, Ppup039090.1, Ppup046770.1, Ppup048860.1, Ppup074880.1, Ppup090820.1, Ppup109360.1, Ppup120140.1, Ppup126170.1, Ppup168760.1
GO:1905809	BP	e	negative regulation of synapse organization	10/2424	18/10157	0.00374893	6	10	0.108564	Ppup004410.1, Ppup027690.1, Ppup059940.1, Ppup064250.1, Ppup071370.1, Ppup075890.1, Ppup084450.1, Ppup101280.1, Ppup120140.1, Ppup174910.1
GO:0006541	BP	e	glutamine metabolic process	10/2424	18/10157	0.00374893	9	10	0.108564	Ppup029370.1, Ppup037640.1, Ppup050190.1, Ppup052590.1, Ppup105390.1, Ppup125730.1, Ppup125740.1, Ppup133900.1, Ppup145850.1, Ppup176440.1
GO:0010608	BP	e	posttranscriptional regulation of gene expression	71/2424	219/10157	0.00379276	6	71	0.109549	Ppup003740.1, Ppup003910.1, Ppup006720.1, Ppup011730.1, Ppup015890.1, Ppup016860.1, Ppup020310.1, Ppup021070.1, Ppup021150.1, Ppup026790.1, Ppup027120.1, Ppup027280.1, Ppup027490.1, Ppup027520.1, Ppup035260.1, Ppup036470.1, Ppup040010.1, Ppup043500.1, Ppup046770.1, Ppup050410.1, Ppup057750.1, Ppup058640.1, Ppup062590.1, Ppup063480.1, Ppup064000.1, Ppup069240.1, Ppup074180.1, Ppup074810.1, Ppup076…
GO:0022604	BP	e	regulation of cell morphogenesis	61/2424	184/10157	0.00387574	5	61	0.11137	Ppup001870.1, Ppup004410.1, Ppup005470.1, Ppup005490.1, Ppup006950.1, Ppup018760.1, Ppup019100.1, Ppup019160.1, Ppup022170.1, Ppup028360.1, Ppup030870.1, Ppup042910.1, Ppup046770.1, Ppup048090.1, Ppup050410.1, Ppup052710.1, Ppup057490.1, Ppup058840.1, Ppup059650.1, Ppup063520.1, Ppup071180.1, Ppup071370.1, Ppup075380.1, Ppup075410.1, Ppup075720.1, Ppup075890.1, Ppup077190.1, Ppup077340.1, Ppup083…
GO:0062013	BP	e	positive regulation of small molecule metabolic process	14/2424	29/10157	0.0039151	5	14	0.112213	Ppup005940.1, Ppup011120.1, Ppup025880.1, Ppup043200.1, Ppup046270.1, Ppup052580.1, Ppup103510.1, Ppup104600.1, Ppup109420.1, Ppup109430.1, Ppup123340.1, Ppup145020.1, Ppup168410.1, Ppup171790.1
GO:0048878	BP	e	chemical homeostasis	102/2424	333/10157	0.00398494	4	102	0.113922	Ppup001870.1, Ppup002250.1, Ppup003230.1, Ppup004080.1, Ppup004140.1, Ppup006500.1, Ppup007260.1, Ppup008700.1, Ppup009820.1, Ppup009830.1, Ppup009900.1, Ppup011380.1, Ppup017930.1, Ppup020100.1, Ppup020860.1, Ppup021350.1, Ppup021490.1, Ppup025890.1, Ppup026440.1, Ppup026550.1, Ppup028600.1, Ppup029430.1, Ppup030870.1, Ppup039980.1, Ppup040860.1, Ppup042450.1, Ppup043200.1, Ppup046770.1, Ppup046…
GO:0031032	BP	e	actomyosin structure organization	29/2424	75/10157	0.00402492	7	29	0.114772	Ppup003910.1, Ppup020230.1, Ppup020360.1, Ppup020370.1, Ppup021210.1, Ppup026370.1, Ppup043740.1, Ppup046730.1, Ppup049760.1, Ppup053540.1, Ppup057310.1, Ppup057910.1, Ppup064390.1, Ppup074720.1, Ppup076830.1, Ppup091990.1, Ppup096760.1, Ppup101280.1, Ppup103510.1, Ppup110820.1, Ppup119510.1, Ppup123560.1, Ppup126130.1, Ppup135110.1, Ppup139640.1, Ppup142060.1, Ppup143220.1, Ppup143230.1, Ppup160…
GO:0042326	BP	e	negative regulation of phosphorylation	36/2424	98/10157	0.00404618	8	36	0.115029	Ppup006720.1, Ppup010070.1, Ppup014250.1, Ppup052760.1, Ppup053970.1, Ppup054230.1, Ppup057830.1, Ppup058220.1, Ppup058670.1, Ppup075230.1, Ppup075720.1, Ppup083600.1, Ppup087280.1, Ppup094070.1, Ppup096980.1, Ppup099800.1, Ppup104470.1, Ppup109280.1, Ppup111590.1, Ppup115210.1, Ppup115500.1, Ppup116770.1, Ppup123000.1, Ppup125780.1, Ppup126550.1, Ppup126790.1, Ppup135110.1, Ppup138480.1, Ppup140…
GO:0031328	BP	e	positive regulation of cellular biosynthetic process	190/2424	665/10157	0.00405697	6	190	0.115029	Ppup001870.1, Ppup003620.1, Ppup004410.1, Ppup004550.1, Ppup005280.1, Ppup006210.1, Ppup006720.1, Ppup007300.1, Ppup007710.1, Ppup008030.1, Ppup008570.1, Ppup008760.1, Ppup011100.1, Ppup011120.1, Ppup014100.1, Ppup015730.1, Ppup016860.1, Ppup017930.1, Ppup017950.1, Ppup018270.1, Ppup018590.1, Ppup018630.1, Ppup018690.1, Ppup018960.1, Ppup019150.1, Ppup019460.1, Ppup019810.1, Ppup019930.1, Ppup019…
GO:0034368	BP	e	protein-lipid complex remodeling	8/2424	13/10157	0.00412656	6	8	0.115029	Ppup043200.1, Ppup047250.1, Ppup060140.1, Ppup104600.1, Ppup109420.1, Ppup109430.1, Ppup130100.1, Ppup162270.1
GO:0000289	BP	e	nuclear-transcribed mRNA poly(A) tail shortening	8/2424	13/10157	0.00412656	10	8	0.115029	Ppup027520.1, Ppup031100.1, Ppup084660.1, Ppup094560.1, Ppup138980.1, Ppup139980.1, Ppup141700.1, Ppup144760.1
GO:0042219	BP	e	cellular modified amino acid catabolic process	8/2424	13/10157	0.00412656	5	8	0.115029	Ppup022030.1, Ppup033140.1, Ppup043390.1, Ppup046080.1, Ppup115020.1, Ppup125320.1, Ppup160680.1, Ppup168100.1
GO:0016334	BP	e	establishment or maintenance of polarity of follicular epithelium	8/2424	13/10157	0.00412656	3	8	0.115029	Ppup027500.1, Ppup041140.1, Ppup085930.1, Ppup086980.1, Ppup109360.1, Ppup137460.1, Ppup160910.1, Ppup168280.1
GO:0045886	BP	e	negative regulation of synaptic growth at neuromuscular junction	8/2424	13/10157	0.00412656	8	8	0.115029	Ppup027690.1, Ppup059940.1, Ppup064250.1, Ppup071370.1, Ppup084450.1, Ppup101280.1, Ppup120140.1, Ppup174910.1
GO:0034369	BP	e	plasma lipoprotein particle remodeling	8/2424	13/10157	0.00412656	7	8	0.115029	Ppup043200.1, Ppup047250.1, Ppup060140.1, Ppup104600.1, Ppup109420.1, Ppup109430.1, Ppup130100.1, Ppup162270.1
GO:1904397	BP	e	negative regulation of neuromuscular junction development	8/2424	13/10157	0.00412656	7	8	0.115029	Ppup027690.1, Ppup059940.1, Ppup064250.1, Ppup071370.1, Ppup084450.1, Ppup101280.1, Ppup120140.1, Ppup174910.1
GO:1903532	BP	e	positive regulation of secretion by cell	32/2424	84/10157	0.00425741	7	32	0.118381	Ppup002780.1, Ppup005940.1, Ppup010280.1, Ppup011470.1, Ppup017930.1, Ppup020500.1, Ppup021570.1, Ppup027680.1, Ppup031510.1, Ppup037880.1, Ppup043200.1, Ppup057910.1, Ppup062600.1, Ppup069310.1, Ppup075960.1, Ppup082620.1, Ppup086470.1, Ppup104600.1, Ppup106480.1, Ppup107790.1, Ppup108180.1, Ppup109260.1, Ppup109420.1, Ppup109430.1, Ppup113560.1, Ppup137390.1, Ppup138910.1, Ppup140050.1, Ppup144…
GO:0040008	BP	e	regulation of growth	83/2424	264/10157	0.00428379	3	83	0.118819	Ppup005470.1, Ppup008680.1, Ppup022170.1, Ppup024220.1, Ppup024270.1, Ppup025260.1, Ppup027410.1, Ppup027690.1, Ppup028360.1, Ppup030870.1, Ppup031080.1, Ppup035800.1, Ppup037540.1, Ppup038210.1, Ppup039090.1, Ppup040150.1, Ppup040580.1, Ppup042930.1, Ppup043150.1, Ppup046070.1, Ppup046770.1, Ppup048090.1, Ppup048850.1, Ppup048860.1, Ppup056640.1, Ppup057830.1, Ppup059940.1, Ppup064250.1, Ppup065…
GO:0051338	BP	e	regulation of transferase activity	69/2424	213/10157	0.00434367	4	69	0.119004	Ppup003100.1, Ppup005320.1, Ppup006720.1, Ppup013130.1, Ppup013200.1, Ppup015730.1, Ppup018680.1, Ppup019820.1, Ppup022170.1, Ppup027280.1, Ppup027810.1, Ppup028810.1, Ppup029910.1, Ppup030870.1, Ppup035940.1, Ppup036080.1, Ppup040150.1, Ppup044130.1, Ppup044250.1, Ppup046070.1, Ppup053660.1, Ppup053970.1, Ppup058670.1, Ppup059860.1, Ppup062600.1, Ppup075760.1, Ppup075960.1, Ppup077440.1, Ppup079…
GO:0015918	BP	e	sterol transport	16/2424	35/10157	0.00458341	6	16	0.125265	Ppup002480.1, Ppup031510.1, Ppup043200.1, Ppup047250.1, Ppup057820.1, Ppup060140.1, Ppup075190.1, Ppup075410.1, Ppup104600.1, Ppup109420.1, Ppup109430.1, Ppup123320.1, Ppup130100.1, Ppup137980.1, Ppup162270.1, Ppup165030.1
GO:1903508	BP	e	positive regulation of nucleic acid-templated transcription	159/2424	549/10157	0.00461614	9	159	0.125556	Ppup001870.1, Ppup003620.1, Ppup004410.1, Ppup004550.1, Ppup005280.1, Ppup006210.1, Ppup007300.1, Ppup007710.1, Ppup008030.1, Ppup008570.1, Ppup008760.1, Ppup011100.1, Ppup014100.1, Ppup017950.1, Ppup018270.1, Ppup018590.1, Ppup018630.1, Ppup018690.1, Ppup018960.1, Ppup019150.1, Ppup019460.1, Ppup019810.1, Ppup019930.1, Ppup019950.1, Ppup021150.1, Ppup021470.1, Ppup023680.1, Ppup023850.1, Ppup024…
GO:0055085	BP	e	transmembrane transport	105/2424	345/10157	0.00461653	4	105	0.125556	Ppup002250.1, Ppup002480.1, Ppup002870.1, Ppup004420.1, Ppup006500.1, Ppup007780.1, Ppup010230.1, Ppup011120.1, Ppup015740.1, Ppup017880.1, Ppup018310.1, Ppup020100.1, Ppup020860.1, Ppup021490.1, Ppup025890.1, Ppup027280.1, Ppup028060.1, Ppup031080.1, Ppup031630.1, Ppup035920.1, Ppup040030.1, Ppup042660.1, Ppup043200.1, Ppup043610.1, Ppup046230.1, Ppup047250.1, Ppup049510.1, Ppup051070.1, Ppup052…
GO:0043467	BP	e	regulation of generation of precursor metabolites and energy	20/2424	46/10157	0.00466662	5	20	0.12661	Ppup027490.1, Ppup052760.1, Ppup062450.1, Ppup063940.1, Ppup094070.1, Ppup095640.1, Ppup097870.1, Ppup101240.1, Ppup103510.1, Ppup123000.1, Ppup123340.1, Ppup125780.1, Ppup133270.1, Ppup140050.1, Ppup145020.1, Ppup152710.1, Ppup160690.1, Ppup168410.1, Ppup171790.1, Ppup176270.1
GO:0009057	BP	e	macromolecule catabolic process	172/2424	599/10157	0.0048262	4	172	0.129993	Ppup001710.1, Ppup001870.1, Ppup002450.1, Ppup002780.1, Ppup002900.1, Ppup003610.1, Ppup004410.1, Ppup004570.1, Ppup005470.1, Ppup006490.1, Ppup006830.1, Ppup008760.1, Ppup012830.1, Ppup014330.1, Ppup018680.1, Ppup018870.1, Ppup019010.1, Ppup019430.1, Ppup019820.1, Ppup020080.1, Ppup021070.1, Ppup022310.1, Ppup023010.1, Ppup023070.1, Ppup025790.1, Ppup026220.1, Ppup026790.1, Ppup026960.1, Ppup027…
GO:0008610	BP	e	lipid biosynthetic process	85/2424	272/10157	0.00484149	4	85	0.130092	Ppup001870.1, Ppup002240.1, Ppup003590.1, Ppup003830.1, Ppup004450.1, Ppup006190.1, Ppup006440.1, Ppup011610.1, Ppup017930.1, Ppup018240.1, Ppup019930.1, Ppup020690.1, Ppup027260.1, Ppup027910.1, Ppup027920.1, Ppup027930.1, Ppup028400.1, Ppup030030.1, Ppup035350.1, Ppup037910.1, Ppup040660.1, Ppup040690.1, Ppup040870.1, Ppup044790.1, Ppup045430.1, Ppup045460.1, Ppup045850.1, Ppup045990.1, Ppup046…
GO:0016574	BP	e	histone ubiquitination	12/2424	23/10157	0.0049185	10	12	0.131844	Ppup013200.1, Ppup018870.1, Ppup025910.1, Ppup039050.1, Ppup039790.1, Ppup046570.1, Ppup091670.1, Ppup128890.1, Ppup133560.1, Ppup146820.1, Ppup147030.1, Ppup161000.1
GO:0036293	BP	e	response to decreased oxygen levels	26/2424	65/10157	0.00493139	4	26	0.131873	Ppup009230.1, Ppup009340.1, Ppup017950.1, Ppup027280.1, Ppup037880.1, Ppup041520.1, Ppup043150.1, Ppup047070.1, Ppup048420.1, Ppup052760.1, Ppup054410.1, Ppup065950.1, Ppup081850.1, Ppup094510.1, Ppup101240.1, Ppup122830.1, Ppup122880.1, Ppup124080.1, Ppup126660.1, Ppup137540.1, Ppup141850.1, Ppup143800.1, Ppup144410.1, Ppup152000.1, Ppup156210.1, Ppup165090.1
GO:0022412	BP	e	cellular process involved in reproduction in multicellular organism	116/2424	386/10157	0.00501466	2	116	0.13378	Ppup001870.1, Ppup007260.1, Ppup008030.1, Ppup008570.1, Ppup011200.1, Ppup015880.1, Ppup015890.1, Ppup017950.1, Ppup018070.1, Ppup018590.1, Ppup018600.1, Ppup018870.1, Ppup021210.1, Ppup021300.1, Ppup021490.1, Ppup022170.1, Ppup022280.1, Ppup024270.1, Ppup026670.1, Ppup027050.1, Ppup027070.1, Ppup027240.1, Ppup027410.1, Ppup027500.1, Ppup031020.1, Ppup031700.1, Ppup037540.1, Ppup037770.1, Ppup039…
GO:0051603	BP	e	proteolysis involved in cellular protein catabolic process	126/2424	424/10157	0.00513326	6	126	0.136618	Ppup001710.1, Ppup002450.1, Ppup002900.1, Ppup003610.1, Ppup004410.1, Ppup004570.1, Ppup005470.1, Ppup006490.1, Ppup006830.1, Ppup008760.1, Ppup010900.1, Ppup012830.1, Ppup018680.1, Ppup018870.1, Ppup019010.1, Ppup019430.1, Ppup019820.1, Ppup020080.1, Ppup021070.1, Ppup022310.1, Ppup023070.1, Ppup026220.1, Ppup026960.1, Ppup028140.1, Ppup031510.1, Ppup031610.1, Ppup033270.1, Ppup038210.1, Ppup039…
GO:0099643	BP	e	signal release from synapse	20/2424	47/10157	0.00520434	7	20	0.138165	Ppup004180.1, Ppup005830.1, Ppup006950.1, Ppup007130.1, Ppup008830.1, Ppup010330.1, Ppup027680.1, Ppup048860.1, Ppup052260.1, Ppup054430.1, Ppup085760.1, Ppup099520.1, Ppup106640.1, Ppup107790.1, Ppup108120.1, Ppup113230.1, Ppup123560.1, Ppup132870.1, Ppup135280.1, Ppup170780.1
GO:0031047	BP	e	gene silencing by RNA	22/2424	53/10157	0.00522845	8	22	0.138165	Ppup021070.1, Ppup027520.1, Ppup040060.1, Ppup040370.1, Ppup040380.1, Ppup050410.1, Ppup054240.1, Ppup064000.1, Ppup084660.1, Ppup086780.1, Ppup093510.1, Ppup108160.1, Ppup112450.1, Ppup123330.1, Ppup139070.1, Ppup139080.1, Ppup141700.1, Ppup144760.1, Ppup145500.1, Ppup154750.1, Ppup162290.1, Ppup167300.1
GO:0002066	BP	e	columnar/cuboidal epithelial cell development	22/2424	53/10157	0.00522845	5	22	0.138165	Ppup018590.1, Ppup031700.1, Ppup039090.1, Ppup042450.1, Ppup045950.1, Ppup050410.1, Ppup058840.1, Ppup065950.1, Ppup086980.1, Ppup095850.1, Ppup109360.1, Ppup114260.1, Ppup135110.1, Ppup135280.1, Ppup137460.1, Ppup142950.1, Ppup145680.1, Ppup146090.1, Ppup165510.1, Ppup173180.1, Ppup173790.1, Ppup173910.1
GO:0019752	BP	e	carboxylic acid metabolic process	137/2424	466/10157	0.00533436	5	137	0.139208	Ppup001760.1, Ppup001870.1, Ppup002290.1, Ppup003130.1, Ppup003740.1, Ppup005460.1, Ppup005600.1, Ppup006190.1, Ppup006550.1, Ppup009640.1, Ppup009900.1, Ppup010470.1, Ppup011120.1, Ppup019840.1, Ppup022030.1, Ppup024400.1, Ppup025130.1, Ppup025770.1, Ppup025880.1, Ppup026550.1, Ppup027910.1, Ppup027920.1, Ppup027930.1, Ppup028780.1, Ppup029370.1, Ppup031730.1, Ppup037550.1, Ppup037640.1, Ppup039…
GO:0045893	BP	e	positive regulation of transcription, DNA-templated	158/2424	547/10157	0.00533958	10	158	0.139208	Ppup001870.1, Ppup003620.1, Ppup004410.1, Ppup004550.1, Ppup005280.1, Ppup006210.1, Ppup007300.1, Ppup007710.1, Ppup008030.1, Ppup008570.1, Ppup008760.1, Ppup011100.1, Ppup014100.1, Ppup017950.1, Ppup018270.1, Ppup018590.1, Ppup018630.1, Ppup018690.1, Ppup018960.1, Ppup019150.1, Ppup019460.1, Ppup019810.1, Ppup019930.1, Ppup019950.1, Ppup021150.1, Ppup021470.1, Ppup023680.1, Ppup023850.1, Ppup024…
GO:1902476	BP	e	chloride transmembrane transport	9/2424	16/10157	0.00534267	8	9	0.139208	Ppup002250.1, Ppup020100.1, Ppup053760.1, Ppup071180.1, Ppup076180.1, Ppup085610.1, Ppup106580.1, Ppup109260.1, Ppup122620.1
GO:0043666	BP	e	regulation of phosphoprotein phosphatase activity	9/2424	16/10157	0.00534267	9	9	0.139208	Ppup027280.1, Ppup041140.1, Ppup053660.1, Ppup063210.1, Ppup099430.1, Ppup101030.1, Ppup112100.1, Ppup121540.1, Ppup149470.1
GO:0018212	BP	e	peptidyl-tyrosine modification	9/2424	16/10157	0.00534267	8	9	0.139208	Ppup036080.1, Ppup058840.1, Ppup071370.1, Ppup077440.1, Ppup086990.1, Ppup101280.1, Ppup109280.1, Ppup116900.1, Ppup174910.1
GO:0033344	BP	e	cholesterol efflux	9/2424	16/10157	0.00534267	8	9	0.139208	Ppup002480.1, Ppup043200.1, Ppup047250.1, Ppup060140.1, Ppup104600.1, Ppup109420.1, Ppup109430.1, Ppup137980.1, Ppup162270.1
GO:1902680	BP	e	positive regulation of RNA biosynthetic process	159/2424	550/10157	0.00542089	8	159	0.140918	Ppup001870.1, Ppup003620.1, Ppup004410.1, Ppup004550.1, Ppup005280.1, Ppup006210.1, Ppup007300.1, Ppup007710.1, Ppup008030.1, Ppup008570.1, Ppup008760.1, Ppup011100.1, Ppup014100.1, Ppup017950.1, Ppup018270.1, Ppup018590.1, Ppup018630.1, Ppup018690.1, Ppup018960.1, Ppup019150.1, Ppup019460.1, Ppup019810.1, Ppup019930.1, Ppup019950.1, Ppup021150.1, Ppup021470.1, Ppup023680.1, Ppup023850.1, Ppup024…
GO:0048638	BP	e	regulation of developmental growth	49/2424	144/10157	0.00562421	4	49	0.145516	Ppup005470.1, Ppup008680.1, Ppup022170.1, Ppup024220.1, Ppup027410.1, Ppup027690.1, Ppup028360.1, Ppup035800.1, Ppup039090.1, Ppup040580.1, Ppup043150.1, Ppup046770.1, Ppup048090.1, Ppup048850.1, Ppup048860.1, Ppup059940.1, Ppup064250.1, Ppup065950.1, Ppup071370.1, Ppup074880.1, Ppup075380.1, Ppup075410.1, Ppup077340.1, Ppup084450.1, Ppup090610.1, Ppup090820.1, Ppup092170.1, Ppup094460.1, Ppup101…
GO:0031532	BP	e	actin cytoskeleton reorganization	13/2424	27/10157	0.00568671	7	13	0.145516	Ppup006500.1, Ppup020360.1, Ppup020370.1, Ppup022170.1, Ppup025490.1, Ppup044250.1, Ppup049290.1, Ppup052710.1, Ppup070550.1, Ppup092160.1, Ppup114050.1, Ppup119510.1, Ppup147010.1
GO:1902414	BP	e	protein localization to cell junction	13/2424	27/10157	0.00568671	4	13	0.145516	Ppup004150.1, Ppup005970.1, Ppup010280.1, Ppup024560.1, Ppup075410.1, Ppup106330.1, Ppup109360.1, Ppup123780.1, Ppup130860.1, Ppup137460.1, Ppup140190.1, Ppup145860.1, Ppup152740.1
GO:0070887	BP	e	cellular response to chemical stimulus	128/2424	434/10157	0.00571456	3	128	0.145516	Ppup002480.1, Ppup003910.1, Ppup004140.1, Ppup004410.1, Ppup008760.1, Ppup009230.1, Ppup009340.1, Ppup009830.1, Ppup017950.1, Ppup018270.1, Ppup018690.1, Ppup018870.1, Ppup019150.1, Ppup019930.1, Ppup021070.1, Ppup021090.1, Ppup021150.1, Ppup024220.1, Ppup025100.1, Ppup025880.1, Ppup026790.1, Ppup027280.1, Ppup027810.1, Ppup031700.1, Ppup035070.1, Ppup035800.1, Ppup036980.1, Ppup037880.1, Ppup038…
GO:0007632	BP	e	visual behavior	7/2424	11/10157	0.00571492	5	7	0.145516	Ppup004150.1, Ppup082200.1, Ppup086080.1, Ppup126170.1, Ppup145930.1, Ppup153590.1, Ppup156210.1
GO:0031623	BP	e	receptor internalization	7/2424	11/10157	0.00571492	7	7	0.145516	Ppup004540.1, Ppup006490.1, Ppup050680.1, Ppup103270.1, Ppup113560.1, Ppup135110.1, Ppup164060.1
GO:1901985	BP	e	positive regulation of protein acetylation	7/2424	11/10157	0.00571492	9	7	0.145516	Ppup026960.1, Ppup035070.1, Ppup042410.1, Ppup043580.1, Ppup122630.1, Ppup140050.1, Ppup171790.1
GO:0097581	BP	e	lamellipodium organization	7/2424	11/10157	0.00571492	6	7	0.145516	Ppup007460.1, Ppup042910.1, Ppup086470.1, Ppup097870.1, Ppup104480.1, Ppup110970.1, Ppup169680.1
GO:0045070	BP	e	positive regulation of viral genome replication	7/2424	11/10157	0.00571492	7	7	0.145516	Ppup007260.1, Ppup027520.1, Ppup040060.1, Ppup076900.1, Ppup107050.1, Ppup138480.1, Ppup145020.1
GO:0000209	BP	e	protein polyubiquitination	52/2424	155/10157	0.00576745	10	52	0.146387	Ppup001730.1, Ppup002900.1, Ppup003610.1, Ppup004410.1, Ppup004570.1, Ppup008760.1, Ppup012830.1, Ppup018870.1, Ppup024570.1, Ppup026790.1, Ppup031660.1, Ppup033270.1, Ppup047070.1, Ppup049010.1, Ppup049390.1, Ppup050100.1, Ppup050170.1, Ppup050680.1, Ppup059220.1, Ppup059860.1, Ppup064640.1, Ppup076330.1, Ppup076390.1, Ppup079510.1, Ppup085820.1, Ppup086580.1, Ppup090640.1, Ppup090810.1, Ppup092…
GO:0071310	BP	e	cellular response to organic substance	92/2424	299/10157	0.00577535	4	92	0.146387	Ppup002480.1, Ppup003910.1, Ppup004410.1, Ppup008760.1, Ppup017950.1, Ppup018690.1, Ppup018870.1, Ppup019150.1, Ppup019930.1, Ppup021070.1, Ppup021090.1, Ppup024220.1, Ppup025100.1, Ppup025880.1, Ppup026790.1, Ppup031700.1, Ppup035800.1, Ppup036980.1, Ppup037880.1, Ppup038890.1, Ppup040750.1, Ppup043580.1, Ppup049720.1, Ppup058670.1, Ppup062600.1, Ppup063060.1, Ppup075210.1, Ppup075380.1, Ppup075…
GO:0045935	BP	e	positive regulation of nucleobase-containing compound metabolic process	185/2424	652/10157	0.00586971	6	185	0.148443	Ppup001870.1, Ppup003620.1, Ppup004410.1, Ppup004550.1, Ppup005280.1, Ppup006210.1, Ppup007300.1, Ppup007710.1, Ppup008030.1, Ppup008570.1, Ppup008760.1, Ppup011100.1, Ppup014100.1, Ppup015730.1, Ppup017950.1, Ppup018270.1, Ppup018590.1, Ppup018630.1, Ppup018690.1, Ppup018960.1, Ppup019150.1, Ppup019460.1, Ppup019810.1, Ppup019930.1, Ppup019950.1, Ppup020310.1, Ppup021150.1, Ppup021470.1, Ppup023…
GO:1902905	BP	e	positive regulation of supramolecular fiber organization	22/2424	54/10157	0.00591373	6	22	0.149218	Ppup018600.1, Ppup021210.1, Ppup027280.1, Ppup042150.1, Ppup044250.1, Ppup057310.1, Ppup075230.1, Ppup086470.1, Ppup086510.1, Ppup090820.1, Ppup103270.1, Ppup109160.1, Ppup115500.1, Ppup120140.1, Ppup122680.1, Ppup123810.1, Ppup135110.1, Ppup140100.1, Ppup141550.1, Ppup143960.1, Ppup145020.1, Ppup171700.1
GO:1903530	BP	e	regulation of secretion by cell	56/2424	168/10157	0.00593826	6	56	0.1495	Ppup002780.1, Ppup004180.1, Ppup005940.1, Ppup007130.1, Ppup008830.1, Ppup010280.1, Ppup011470.1, Ppup014360.1, Ppup017930.1, Ppup019200.1, Ppup020290.1, Ppup020500.1, Ppup021570.1, Ppup024510.1, Ppup025880.1, Ppup026960.1, Ppup027680.1, Ppup031510.1, Ppup037880.1, Ppup038420.1, Ppup043200.1, Ppup052260.1, Ppup057910.1, Ppup062600.1, Ppup069310.1, Ppup074160.1, Ppup075960.1, Ppup082620.1, Ppup082…
GO:0031056	BP	e	regulation of histone modification	26/2424	67/10157	0.00597894	8	26	0.150186	Ppup005470.1, Ppup018270.1, Ppup019810.1, Ppup033420.1, Ppup035070.1, Ppup035890.1, Ppup037880.1, Ppup039960.1, Ppup042410.1, Ppup043580.1, Ppup049720.1, Ppup057830.1, Ppup058370.1, Ppup061660.1, Ppup075380.1, Ppup080180.1, Ppup091670.1, Ppup106650.1, Ppup108340.1, Ppup122630.1, Ppup123820.1, Ppup130950.1, Ppup133560.1, Ppup140050.1, Ppup143800.1, Ppup176270.1
GO:1903313	BP	e	positive regulation of mRNA metabolic process	18/2424	42/10157	0.0060959	8	18	0.15278	Ppup020310.1, Ppup024750.1, Ppup026790.1, Ppup027520.1, Ppup040010.1, Ppup040060.1, Ppup064000.1, Ppup077510.1, Ppup084660.1, Ppup086780.1, Ppup110000.1, Ppup123910.1, Ppup133560.1, Ppup138480.1, Ppup139800.1, Ppup162190.1, Ppup167300.1, Ppup173830.1
GO:0045944	BP	e	positive regulation of transcription by RNA polymerase II	115/2424	386/10157	0.0061434	11	115	0.152901	Ppup001870.1, Ppup004410.1, Ppup004550.1, Ppup007710.1, Ppup011100.1, Ppup014100.1, Ppup017950.1, Ppup018270.1, Ppup018590.1, Ppup018630.1, Ppup019150.1, Ppup019460.1, Ppup019930.1, Ppup023680.1, Ppup023850.1, Ppup025920.1, Ppup027170.1, Ppup027200.1, Ppup027520.1, Ppup028340.1, Ppup031700.1, Ppup033160.1, Ppup033420.1, Ppup035070.1, Ppup035800.1, Ppup036030.1, Ppup037560.1, Ppup037880.1, Ppup038…
GO:2000377	BP	e	regulation of reactive oxygen species metabolic process	12/2424	24/10157	0.00620564	5	12	0.152901	Ppup011120.1, Ppup027200.1, Ppup046770.1, Ppup052590.1, Ppup084280.1, Ppup086470.1, Ppup101240.1, Ppup121630.1, Ppup134150.1, Ppup138770.1, Ppup140050.1, Ppup176270.1
GO:0070936	BP	e	protein K48-linked ubiquitination	12/2424	24/10157	0.00620564	11	12	0.152901	Ppup003610.1, Ppup004410.1, Ppup012830.1, Ppup059220.1, Ppup059860.1, Ppup064640.1, Ppup092330.1, Ppup097750.1, Ppup122650.1, Ppup124080.1, Ppup131770.1, Ppup166650.1
GO:0032365	BP	e	intracellular lipid transport	12/2424	24/10157	0.00620564	6	12	0.152901	Ppup043200.1, Ppup051070.1, Ppup057820.1, Ppup075190.1, Ppup075410.1, Ppup104600.1, Ppup109420.1, Ppup109430.1, Ppup116490.1, Ppup123320.1, Ppup137980.1, Ppup171790.1
GO:0009967	BP	e	positive regulation of signal transduction	121/2424	407/10157	0.00623624	6	121	0.152901	Ppup001710.1, Ppup001800.1, Ppup004150.1, Ppup004410.1, Ppup004550.1, Ppup005280.1, Ppup005490.1, Ppup006490.1, Ppup006500.1, Ppup010210.1, Ppup010280.1, Ppup010900.1, Ppup011100.1, Ppup013130.1, Ppup017930.1, Ppup019150.1, Ppup019460.1, Ppup019930.1, Ppup022170.1, Ppup024570.1, Ppup026790.1, Ppup026960.1, Ppup027200.1, Ppup027410.1, Ppup028340.1, Ppup028810.1, Ppup030870.1, Ppup035070.1, Ppup035…
GO:1903902	BP	e	positive regulation of viral life cycle	10/2424	19/10157	0.00623751	6	10	0.152901	Ppup007260.1, Ppup027520.1, Ppup031510.1, Ppup040060.1, Ppup076900.1, Ppup107050.1, Ppup120030.1, Ppup134690.1, Ppup138480.1, Ppup145020.1
GO:0072348	BP	e	sulfur compound transport	10/2424	19/10157	0.00623751	4	10	0.152901	Ppup028060.1, Ppup055920.1, Ppup064670.1, Ppup073340.1, Ppup085660.1, Ppup091990.1, Ppup097320.1, Ppup106580.1, Ppup114070.1, Ppup162630.1
GO:0051438	BP	e	regulation of ubiquitin-protein transferase activity	10/2424	19/10157	0.00623751	10	10	0.152901	Ppup013200.1, Ppup018680.1, Ppup040150.1, Ppup053660.1, Ppup059860.1, Ppup079510.1, Ppup082970.1, Ppup090640.1, Ppup139970.1, Ppup141010.1
GO:0014706	BP	e	striated muscle tissue development	10/2424	19/10157	0.00623751	5	10	0.152901	Ppup005470.1, Ppup006210.1, Ppup018590.1, Ppup022260.1, Ppup028360.1, Ppup043550.1, Ppup043740.1, Ppup054060.1, Ppup124100.1, Ppup132570.1
GO:0030155	BP	e	regulation of cell adhesion	47/2424	138/10157	0.00642771	4	47	0.157219	Ppup003910.1, Ppup005490.1, Ppup009830.1, Ppup010190.1, Ppup020230.1, Ppup026790.1, Ppup027280.1, Ppup036080.1, Ppup036980.1, Ppup037880.1, Ppup038890.1, Ppup040010.1, Ppup042910.1, Ppup048850.1, Ppup057310.1, Ppup057830.1, Ppup058040.1, Ppup062600.1, Ppup063210.1, Ppup069210.1, Ppup069390.1, Ppup083090.1, Ppup084230.1, Ppup084280.1, Ppup086420.1, Ppup086470.1, Ppup086710.1, Ppup093860.1, Ppup099…
GO:0051302	BP	e	regulation of cell division	24/2424	61/10157	0.006461	4	24	0.157688	Ppup003100.1, Ppup018600.1, Ppup023070.1, Ppup025490.1, Ppup036920.1, Ppup053540.1, Ppup057830.1, Ppup075410.1, Ppup091990.1, Ppup092800.1, Ppup099200.1, Ppup104210.1, Ppup110010.1, Ppup110880.1, Ppup115500.1, Ppup122720.1, Ppup123340.1, Ppup126130.1, Ppup130440.1, Ppup140810.1, Ppup144610.1, Ppup160440.1, Ppup160910.1, Ppup161160.1
GO:0042058	BP	e	regulation of epidermal growth factor receptor signaling pathway	15/2424	33/10157	0.00666106	7	15	0.161163	Ppup021570.1, Ppup024510.1, Ppup042910.1, Ppup058670.1, Ppup071390.1, Ppup086620.1, Ppup092470.1, Ppup101280.1, Ppup109360.1, Ppup114050.1, Ppup137460.1, Ppup150610.1, Ppup162290.1, Ppup166650.1, Ppup174910.1
GO:0043409	BP	e	negative regulation of MAPK cascade	15/2424	33/10157	0.00666106	10	15	0.161163	Ppup010070.1, Ppup014250.1, Ppup054230.1, Ppup057830.1, Ppup075720.1, Ppup083600.1, Ppup094070.1, Ppup096980.1, Ppup104470.1, Ppup126790.1, Ppup140310.1, Ppup145680.1, Ppup146370.1, Ppup156210.1, Ppup162360.1
GO:1901264	BP	e	carbohydrate derivative transport	15/2424	33/10157	0.00666106	5	15	0.161163	Ppup010920.1, Ppup024330.1, Ppup035920.1, Ppup043200.1, Ppup046230.1, Ppup047250.1, Ppup060140.1, Ppup064670.1, Ppup104600.1, Ppup109420.1, Ppup109430.1, Ppup122750.1, Ppup144560.1, Ppup162270.1, Ppup173320.1
GO:1901184	BP	e	regulation of ERBB signaling pathway	15/2424	33/10157	0.00666106	6	15	0.161163	Ppup021570.1, Ppup024510.1, Ppup042910.1, Ppup058670.1, Ppup071390.1, Ppup086620.1, Ppup092470.1, Ppup101280.1, Ppup109360.1, Ppup114050.1, Ppup137460.1, Ppup150610.1, Ppup162290.1, Ppup166650.1, Ppup174910.1
GO:0071496	BP	e	cellular response to external stimulus	36/2424	101/10157	0.00688451	3	36	0.165676	Ppup009730.1, Ppup012590.1, Ppup016190.1, Ppup021150.1, Ppup021300.1, Ppup027200.1, Ppup027280.1, Ppup028400.1, Ppup035420.1, Ppup058440.1, Ppup062600.1, Ppup065840.1, Ppup084770.1, Ppup086080.1, Ppup086470.1, Ppup091760.1, Ppup092000.1, Ppup094510.1, Ppup101240.1, Ppup112480.1, Ppup116700.1, Ppup119520.1, Ppup122880.1, Ppup123000.1, Ppup126550.1, Ppup133890.1, Ppup134150.1, Ppup138770.1, Ppup139…
GO:0002252	BP	e	immune effector process	45/2424	131/10157	0.00698665	2	45	0.167379	Ppup001870.1, Ppup006950.1, Ppup010940.1, Ppup022170.1, Ppup026790.1, Ppup027200.1, Ppup027280.1, Ppup027520.1, Ppup036280.1, Ppup043610.1, Ppup053510.1, Ppup058840.1, Ppup061660.1, Ppup082030.1, Ppup082130.1, Ppup082260.1, Ppup086420.1, Ppup091630.1, Ppup101240.1, Ppup102180.1, Ppup105750.1, Ppup106080.1, Ppup110010.1, Ppup114050.1, Ppup116340.1, Ppup116770.1, Ppup117200.1, Ppup122120.1, Ppup124…
GO:0040011	BP	e	locomotion	114/2424	382/10157	0.00699284	1	114	0.167379	Ppup001870.1, Ppup003170.1, Ppup003910.1, Ppup004200.1, Ppup004450.1, Ppup005460.1, Ppup005490.1, Ppup007780.1, Ppup010280.1, Ppup010900.1, Ppup011200.1, Ppup014360.1, Ppup017930.1, Ppup017950.1, Ppup018760.1, Ppup021210.1, Ppup021490.1, Ppup022170.1, Ppup025130.1, Ppup025970.1, Ppup026660.1, Ppup026670.1, Ppup027500.1, Ppup031700.1, Ppup036280.1, Ppup037540.1, Ppup038960.1, Ppup039320.1, Ppup040…
GO:0009266	BP	e	response to temperature stimulus	34/2424	94/10157	0.00714914	3	34	0.170377	Ppup004450.1, Ppup010470.1, Ppup018070.1, Ppup018300.1, Ppup021070.1, Ppup021150.1, Ppup021470.1, Ppup027250.1, Ppup040660.1, Ppup045860.1, Ppup053850.1, Ppup062660.1, Ppup063060.1, Ppup065920.1, Ppup076830.1, Ppup086960.1, Ppup096980.1, Ppup098430.1, Ppup099390.1, Ppup109260.1, Ppup116770.1, Ppup122470.1, Ppup126660.1, Ppup136110.1, Ppup137940.1, Ppup139870.1, Ppup143520.1, Ppup143800.1, Ppup145…
GO:0060341	BP	e	regulation of cellular localization	105/2424	349/10157	0.00716381	4	105	0.170377	Ppup003230.1, Ppup004180.1, Ppup005470.1, Ppup007130.1, Ppup007260.1, Ppup008830.1, Ppup009830.1, Ppup010280.1, Ppup010330.1, Ppup011470.1, Ppup015730.1, Ppup017930.1, Ppup018600.1, Ppup019200.1, Ppup020500.1, Ppup020690.1, Ppup026440.1, Ppup029460.1, Ppup030870.1, Ppup037330.1, Ppup038210.1, Ppup038420.1, Ppup038960.1, Ppup047070.1, Ppup048770.1, Ppup049390.1, Ppup050170.1, Ppup050970.1, Ppup052…
GO:0050776	BP	e	regulation of immune response	58/2424	177/10157	0.00736585	4	58	0.173897	Ppup008760.1, Ppup018600.1, Ppup019220.1, Ppup020500.1, Ppup026660.1, Ppup026790.1, Ppup027200.1, Ppup027500.1, Ppup027520.1, Ppup027790.1, Ppup030870.1, Ppup035960.1, Ppup036280.1, Ppup037880.1, Ppup040010.1, Ppup045480.1, Ppup048850.1, Ppup050170.1, Ppup052950.1, Ppup052960.1, Ppup053150.1, Ppup053970.1, Ppup054230.1, Ppup058040.1, Ppup075330.1, Ppup075380.1, Ppup075580.1, Ppup075720.1, Ppup077…
GO:0031347	BP	e	regulation of defense response	54/2424	164/10157	0.00737405	5	54	0.173897	Ppup005470.1, Ppup008760.1, Ppup011120.1, Ppup019220.1, Ppup020500.1, Ppup022030.1, Ppup026660.1, Ppup027200.1, Ppup027500.1, Ppup027520.1, Ppup040010.1, Ppup044250.1, Ppup045480.1, Ppup050410.1, Ppup052950.1, Ppup052960.1, Ppup053970.1, Ppup054230.1, Ppup075330.1, Ppup075380.1, Ppup075580.1, Ppup075720.1, Ppup082030.1, Ppup083600.1, Ppup098040.1, Ppup103750.1, Ppup106080.1, Ppup106190.1, Ppup109…
GO:0097549	BP	e	chromatin organization involved in negative regulation of transcription	21/2424	51/10157	0.00741293	6	21	0.174079	Ppup013200.1, Ppup018600.1, Ppup018870.1, Ppup022280.1, Ppup025760.1, Ppup039420.1, Ppup040370.1, Ppup040380.1, Ppup050210.1, Ppup053830.1, Ppup076270.1, Ppup076280.1, Ppup092260.1, Ppup104340.1, Ppup123820.1, Ppup127650.1, Ppup140070.1, Ppup140190.1, Ppup142580.1, Ppup171700.1, Ppup175160.1
GO:1903322	BP	e	positive regulation of protein modification by small protein conjugation or removal	21/2424	51/10157	0.00741293	9	21	0.174079	Ppup004410.1, Ppup013200.1, Ppup018680.1, Ppup024570.1, Ppup040150.1, Ppup053660.1, Ppup059860.1, Ppup075920.1, Ppup079510.1, Ppup082970.1, Ppup083220.1, Ppup090640.1, Ppup092370.1, Ppup104550.1, Ppup122830.1, Ppup126130.1, Ppup130950.1, Ppup131770.1, Ppup139970.1, Ppup141010.1, Ppup167810.1
GO:0051271	BP	e	negative regulation of cellular component movement	19/2424	45/10157	0.00744764	5	19	0.174407	Ppup005490.1, Ppup014250.1, Ppup025700.1, Ppup026310.1, Ppup050970.1, Ppup057310.1, Ppup057830.1, Ppup075760.1, Ppup076820.1, Ppup085360.1, Ppup093860.1, Ppup111590.1, Ppup116890.1, Ppup127050.1, Ppup132570.1, Ppup138480.1, Ppup145860.1, Ppup146370.1, Ppup165990.1
GO:0007167	BP	e	enzyme linked receptor protein signaling pathway	55/2424	166/10157	0.00748193	6	55	0.174407	Ppup010070.1, Ppup014250.1, Ppup017950.1, Ppup019930.1, Ppup022170.1, Ppup024220.1, Ppup028100.1, Ppup036080.1, Ppup037010.1, Ppup037560.1, Ppup039090.1, Ppup042910.1, Ppup044420.1, Ppup046770.1, Ppup052710.1, Ppup054440.1, Ppup058240.1, Ppup061290.1, Ppup062600.1, Ppup063940.1, Ppup069710.1, Ppup075890.1, Ppup077440.1, Ppup083740.1, Ppup086470.1, Ppup086530.1, Ppup087280.1, Ppup092980.1, Ppup098…
GO:0006458	BP	e	'de novo' protein folding	11/2424	21/10157	0.00758986	3	11	0.174407	Ppup004040.1, Ppup021070.1, Ppup028830.1, Ppup053850.1, Ppup063060.1, Ppup075210.1, Ppup099390.1, Ppup104910.1, Ppup145840.1, Ppup149470.1, Ppup168410.1
GO:0031114	BP	e	regulation of microtubule depolymerization	8/2424	14/10157	0.00762745	9	8	0.174407	Ppup009190.1, Ppup043440.1, Ppup087280.1, Ppup106040.1, Ppup114260.1, Ppup120140.1, Ppup151290.1, Ppup167630.1
GO:0071825	BP	e	protein-lipid complex subunit organization	8/2424	14/10157	0.00762745	5	8	0.174407	Ppup043200.1, Ppup047250.1, Ppup060140.1, Ppup104600.1, Ppup109420.1, Ppup109430.1, Ppup130100.1, Ppup162270.1
GO:0051124	BP	e	synaptic growth at neuromuscular junction	8/2424	14/10157	0.00762745	7	8	0.174407	Ppup008830.1, Ppup024570.1, Ppup074880.1, Ppup098040.1, Ppup109360.1, Ppup112480.1, Ppup137940.1, Ppup167630.1
GO:0042987	BP	e	amyloid precursor protein catabolic process	8/2424	14/10157	0.00762745	6	8	0.174407	Ppup004080.1, Ppup043200.1, Ppup086420.1, Ppup104600.1, Ppup109420.1, Ppup109430.1, Ppup120560.1, Ppup124670.1
GO:0051964	BP	e	negative regulation of synapse assembly	8/2424	14/10157	0.00762745	7	8	0.174407	Ppup027690.1, Ppup059940.1, Ppup064250.1, Ppup071370.1, Ppup084450.1, Ppup101280.1, Ppup120140.1, Ppup174910.1
GO:0030835	BP	e	negative regulation of actin filament depolymerization	8/2424	14/10157	0.00762745	11	8	0.174407	Ppup009190.1, Ppup043440.1, Ppup064390.1, Ppup114260.1, Ppup126790.1, Ppup142060.1, Ppup150900.1, Ppup165030.1
GO:0071827	BP	e	plasma lipoprotein particle organization	8/2424	14/10157	0.00762745	6	8	0.174407	Ppup043200.1, Ppup047250.1, Ppup060140.1, Ppup104600.1, Ppup109420.1, Ppup109430.1, Ppup130100.1, Ppup162270.1
GO:0097120	BP	e	receptor localization to synapse	8/2424	14/10157	0.00762745	6	8	0.174407	Ppup004150.1, Ppup024560.1, Ppup075410.1, Ppup106330.1, Ppup109360.1, Ppup130860.1, Ppup137460.1, Ppup140190.1
GO:0002684	BP	e	positive regulation of immune system process	58/2424	178/10157	0.00762971	4	58	0.174407	Ppup002890.1, Ppup008760.1, Ppup020500.1, Ppup026660.1, Ppup026790.1, Ppup027200.1, Ppup027500.1, Ppup027810.1, Ppup030870.1, Ppup036280.1, Ppup037880.1, Ppup048850.1, Ppup050170.1, Ppup053150.1, Ppup053850.1, Ppup053970.1, Ppup057910.1, Ppup058040.1, Ppup066020.1, Ppup069210.1, Ppup069390.1, Ppup075330.1, Ppup075380.1, Ppup075580.1, Ppup077400.1, Ppup082030.1, Ppup086420.1, Ppup086470.1, Ppup086…
GO:0034330	BP	e	cell junction organization	58/2424	178/10157	0.00762971	4	58	0.174407	Ppup005970.1, Ppup008830.1, Ppup009190.1, Ppup009830.1, Ppup010280.1, Ppup011220.1, Ppup024570.1, Ppup026370.1, Ppup027280.1, Ppup039380.1, Ppup041140.1, Ppup042910.1, Ppup055840.1, Ppup057830.1, Ppup074880.1, Ppup083090.1, Ppup086270.1, Ppup087280.1, Ppup098040.1, Ppup101150.1, Ppup101280.1, Ppup103270.1, Ppup103510.1, Ppup103750.1, Ppup106710.1, Ppup108120.1, Ppup109360.1, Ppup110970.1, Ppup112…
GO:0032515	BP	e	negative regulation of phosphoprotein phosphatase activity	6/2424	9/10157	0.00781758	10	6	0.17477	Ppup041140.1, Ppup053660.1, Ppup101030.1, Ppup112100.1, Ppup121540.1, Ppup149470.1
GO:0008272	BP	e	sulfate transport	6/2424	9/10157	0.00781758	7	6	0.17477	Ppup055920.1, Ppup073340.1, Ppup085660.1, Ppup091990.1, Ppup097320.1, Ppup162630.1
GO:0090140	BP	e	regulation of mitochondrial fission	6/2424	9/10157	0.00781758	7	6	0.17477	Ppup027250.1, Ppup075690.1, Ppup095230.1, Ppup101240.1, Ppup153590.1, Ppup169820.1
GO:0032376	BP	e	positive regulation of cholesterol transport	6/2424	9/10157	0.00781758	8	6	0.17477	Ppup043200.1, Ppup054230.1, Ppup104600.1, Ppup109420.1, Ppup109430.1, Ppup130100.1
GO:0070868	BP	e	heterochromatin organization involved in chromatin silencing	6/2424	9/10157	0.00781758	7	6	0.17477	Ppup018600.1, Ppup076270.1, Ppup076280.1, Ppup092260.1, Ppup140190.1, Ppup142580.1
GO:1990090	BP	e	cellular response to nerve growth factor stimulus	6/2424	9/10157	0.00781758	6	6	0.17477	Ppup004410.1, Ppup043580.1, Ppup120280.1, Ppup123220.1, Ppup131150.1, Ppup156210.1
GO:0036010	BP	e	protein localization to endosome	6/2424	9/10157	0.00781758	6	6	0.17477	Ppup013930.1, Ppup024560.1, Ppup046560.1, Ppup093440.1, Ppup094530.1, Ppup137460.1
GO:2000758	BP	e	positive regulation of peptidyl-lysine acetylation	6/2424	9/10157	0.00781758	10	6	0.17477	Ppup035070.1, Ppup042410.1, Ppup043580.1, Ppup122630.1, Ppup140050.1, Ppup171790.1
GO:1990089	BP	e	response to nerve growth factor	6/2424	9/10157	0.00781758	5	6	0.17477	Ppup004410.1, Ppup043580.1, Ppup120280.1, Ppup123220.1, Ppup131150.1, Ppup156210.1
GO:0032373	BP	e	positive regulation of sterol transport	6/2424	9/10157	0.00781758	7	6	0.17477	Ppup043200.1, Ppup054230.1, Ppup104600.1, Ppup109420.1, Ppup109430.1, Ppup130100.1
GO:0061013	BP	e	regulation of mRNA catabolic process	23/2424	58/10157	0.00786919	8	23	0.175572	Ppup011730.1, Ppup015890.1, Ppup020310.1, Ppup026790.1, Ppup027520.1, Ppup036470.1, Ppup040010.1, Ppup040060.1, Ppup058640.1, Ppup064000.1, Ppup076900.1, Ppup084660.1, Ppup086780.1, Ppup110000.1, Ppup114980.1, Ppup114990.1, Ppup122610.1, Ppup139800.1, Ppup140390.1, Ppup154550.1, Ppup167300.1, Ppup168420.1, Ppup173830.1
GO:0016567	BP	e	protein ubiquitination	108/2424	361/10157	0.0081526	9	108	0.181533	Ppup001720.1, Ppup001730.1, Ppup002450.1, Ppup002900.1, Ppup003610.1, Ppup004410.1, Ppup004570.1, Ppup008630.1, Ppup008760.1, Ppup012830.1, Ppup013200.1, Ppup018680.1, Ppup018870.1, Ppup019010.1, Ppup020080.1, Ppup023000.1, Ppup023070.1, Ppup023680.1, Ppup024220.1, Ppup024570.1, Ppup025110.1, Ppup025910.1, Ppup026790.1, Ppup028140.1, Ppup031660.1, Ppup033270.1, Ppup039050.1, Ppup039790.1, Ppup040…
GO:0051716	BP	e	cellular response to stimulus	284/2424	1044/10157	0.00817454	2	284	0.18166	Ppup001720.1, Ppup002240.1, Ppup002480.1, Ppup002900.1, Ppup003910.1, Ppup004140.1, Ppup004410.1, Ppup004450.1, Ppup005470.1, Ppup006830.1, Ppup008760.1, Ppup009230.1, Ppup009340.1, Ppup009730.1, Ppup009830.1, Ppup011260.1, Ppup012590.1, Ppup015890.1, Ppup016190.1, Ppup017410.1, Ppup017930.1, Ppup017950.1, Ppup018070.1, Ppup018270.1, Ppup018690.1, Ppup018870.1, Ppup019150.1, Ppup019460.1, Ppup019…
GO:0001952	BP	e	regulation of cell-matrix adhesion	12/2424	25/10157	0.00830591	6	12	0.182763	Ppup003910.1, Ppup020230.1, Ppup027280.1, Ppup036080.1, Ppup036980.1, Ppup057310.1, Ppup084230.1, Ppup086470.1, Ppup116890.1, Ppup122670.1, Ppup146370.1, Ppup156210.1
GO:0048871	BP	e	multicellular organismal homeostasis	12/2424	25/10157	0.00830591	4	12	0.182763	Ppup002250.1, Ppup028600.1, Ppup057830.1, Ppup062320.1, Ppup064880.1, Ppup090400.1, Ppup126020.1, Ppup126890.1, Ppup140310.1, Ppup165290.1, Ppup168340.1, Ppup171790.1
GO:0061014	BP	e	positive regulation of mRNA catabolic process	12/2424	25/10157	0.00830591	9	12	0.182763	Ppup020310.1, Ppup026790.1, Ppup027520.1, Ppup040010.1, Ppup040060.1, Ppup064000.1, Ppup084660.1, Ppup086780.1, Ppup110000.1, Ppup139800.1, Ppup167300.1, Ppup173830.1
GO:0048168	BP	e	regulation of neuronal synaptic plasticity	12/2424	25/10157	0.00830591	8	12	0.182763	Ppup004150.1, Ppup018140.1, Ppup019200.1, Ppup038420.1, Ppup038960.1, Ppup054430.1, Ppup075410.1, Ppup098040.1, Ppup106330.1, Ppup108120.1, Ppup113560.1, Ppup135110.1
GO:0010883	BP	e	regulation of lipid storage	15/2424	34/10157	0.00847363	5	15	0.185722	Ppup024580.1, Ppup027250.1, Ppup040660.1, Ppup043200.1, Ppup047250.1, Ppup060140.1, Ppup075760.1, Ppup104600.1, Ppup109420.1, Ppup109430.1, Ppup120280.1, Ppup133890.1, Ppup140970.1, Ppup140980.1, Ppup162270.1
GO:0009132	BP	e	nucleoside diphosphate metabolic process	15/2424	34/10157	0.00847363	7	15	0.185722	Ppup009900.1, Ppup026550.1, Ppup039110.1, Ppup040860.1, Ppup052600.1, Ppup074930.1, Ppup075960.1, Ppup113400.1, Ppup117160.1, Ppup119950.1, Ppup122750.1, Ppup123890.1, Ppup152140.1, Ppup162500.1, Ppup167240.1
GO:0007033	BP	e	vacuole organization	28/2424	74/10157	0.00859046	5	28	0.187914	Ppup001870.1, Ppup004080.1, Ppup012590.1, Ppup029460.1, Ppup031510.1, Ppup049570.1, Ppup054530.1, Ppup058440.1, Ppup082200.1, Ppup084770.1, Ppup087090.1, Ppup099640.1, Ppup110950.1, Ppup112480.1, Ppup114030.1, Ppup116340.1, Ppup120290.1, Ppup122320.1, Ppup122830.1, Ppup126550.1, Ppup126800.1, Ppup133260.1, Ppup140310.1, Ppup145020.1, Ppup154510.1, Ppup161610.1, Ppup169160.1, Ppup169690.1
GO:0007269	BP	e	neurotransmitter secretion	17/2424	40/10157	0.00867281	8	17	0.189345	Ppup004180.1, Ppup005830.1, Ppup006950.1, Ppup007130.1, Ppup048860.1, Ppup052260.1, Ppup054430.1, Ppup085760.1, Ppup099520.1, Ppup106640.1, Ppup107790.1, Ppup108120.1, Ppup113230.1, Ppup123560.1, Ppup132870.1, Ppup135280.1, Ppup170780.1
GO:0051046	BP	e	regulation of secretion	60/2424	185/10157	0.00874977	5	60	0.189544	Ppup002780.1, Ppup004180.1, Ppup005940.1, Ppup007130.1, Ppup008830.1, Ppup010280.1, Ppup011470.1, Ppup014360.1, Ppup017930.1, Ppup019200.1, Ppup020290.1, Ppup020500.1, Ppup021570.1, Ppup024510.1, Ppup025880.1, Ppup026440.1, Ppup026960.1, Ppup027680.1, Ppup031510.1, Ppup037880.1, Ppup038420.1, Ppup043200.1, Ppup049000.1, Ppup050340.1, Ppup052260.1, Ppup057910.1, Ppup062600.1, Ppup069310.1, Ppup074…
GO:0046883	BP	e	regulation of hormone secretion	23/2424	59/10157	0.00889994	7	23	0.191799	Ppup005940.1, Ppup010280.1, Ppup011470.1, Ppup014360.1, Ppup017930.1, Ppup025880.1, Ppup026960.1, Ppup037880.1, Ppup062600.1, Ppup069310.1, Ppup075960.1, Ppup082790.1, Ppup086470.1, Ppup108180.1, Ppup109260.1, Ppup137390.1, Ppup138910.1, Ppup139120.1, Ppup144880.1, Ppup146980.1, Ppup149470.1, Ppup165290.1, Ppup172340.1
GO:0046488	BP	e	phosphatidylinositol metabolic process	23/2424	59/10157	0.00889994	7	23	0.191799	Ppup004450.1, Ppup006440.1, Ppup010210.1, Ppup020690.1, Ppup024220.1, Ppup027260.1, Ppup028400.1, Ppup033260.1, Ppup040690.1, Ppup062660.1, Ppup081980.1, Ppup085530.1, Ppup092480.1, Ppup094070.1, Ppup123980.1, Ppup126400.1, Ppup131820.1, Ppup134680.1, Ppup141050.1, Ppup141230.1, Ppup142860.1, Ppup147010.1, Ppup163850.1
GO:0051047	BP	e	positive regulation of secretion	33/2424	91/10157	0.00890532	6	33	0.191799	Ppup002780.1, Ppup005940.1, Ppup010280.1, Ppup011470.1, Ppup017930.1, Ppup020500.1, Ppup021570.1, Ppup027680.1, Ppup031510.1, Ppup037880.1, Ppup043200.1, Ppup050340.1, Ppup057910.1, Ppup062600.1, Ppup069310.1, Ppup075960.1, Ppup082620.1, Ppup086470.1, Ppup104600.1, Ppup106480.1, Ppup107790.1, Ppup108180.1, Ppup109260.1, Ppup109420.1, Ppup109430.1, Ppup113560.1, Ppup137390.1, Ppup138910.1, Ppup140…
GO:0030837	BP	e	negative regulation of actin filament polymerization	9/2424	17/10157	0.00897287	11	9	0.192143	Ppup005490.1, Ppup009190.1, Ppup064390.1, Ppup084280.1, Ppup084510.1, Ppup114260.1, Ppup126790.1, Ppup142060.1, Ppup150900.1
GO:0051403	BP	e	stress-activated MAPK cascade	9/2424	17/10157	0.00897287	10	9	0.192143	Ppup008760.1, Ppup035940.1, Ppup058100.1, Ppup086990.1, Ppup107050.1, Ppup112100.1, Ppup115100.1, Ppup134990.1, Ppup145680.1
GO:0030834	BP	e	regulation of actin filament depolymerization	9/2424	17/10157	0.00897287	10	9	0.192143	Ppup009190.1, Ppup021210.1, Ppup043440.1, Ppup064390.1, Ppup114260.1, Ppup126790.1, Ppup142060.1, Ppup150900.1, Ppup165030.1
GO:0010631	BP	e	epithelial cell migration	30/2424	82/10157	0.00902894	6	30	0.192974	Ppup003170.1, Ppup005490.1, Ppup011200.1, Ppup021210.1, Ppup027500.1, Ppup047250.1, Ppup048860.1, Ppup053410.1, Ppup058840.1, Ppup060140.1, Ppup062600.1, Ppup075720.1, Ppup085930.1, Ppup086980.1, Ppup097400.1, Ppup104330.1, Ppup110820.1, Ppup114050.1, Ppup115290.1, Ppup117200.1, Ppup120340.1, Ppup135110.1, Ppup141550.1, Ppup150900.1, Ppup162270.1, Ppup165510.1, Ppup168280.1, Ppup168760.1, Ppup169…
GO:0022607	BP	e	cellular component assembly	292/2424	1077/10157	0.00907123	4	292	0.193508	Ppup001800.1, Ppup003030.1, Ppup005800.1, Ppup005970.1, Ppup006440.1, Ppup006950.1, Ppup007260.1, Ppup007460.1, Ppup007690.1, Ppup008630.1, Ppup008690.1, Ppup008830.1, Ppup009830.1, Ppup009920.1, Ppup010210.1, Ppup010280.1, Ppup012590.1, Ppup013930.1, Ppup014100.1, Ppup015790.1, Ppup015890.1, Ppup016840.1, Ppup017480.1, Ppup017690.1, Ppup018070.1, Ppup018270.1, Ppup018550.1, Ppup018680.1, Ppup019…
GO:0016050	BP	e	vesicle organization	38/2424	109/10157	0.00909999	5	38	0.193752	Ppup003070.1, Ppup003780.1, Ppup004180.1, Ppup007260.1, Ppup009920.1, Ppup021570.1, Ppup021890.1, Ppup029460.1, Ppup031510.1, Ppup046930.1, Ppup048770.1, Ppup050340.1, Ppup054430.1, Ppup057910.1, Ppup058400.1, Ppup075410.1, Ppup082200.1, Ppup085140.1, Ppup086720.1, Ppup096440.1, Ppup099430.1, Ppup106290.1, Ppup106330.1, Ppup113560.1, Ppup123220.1, Ppup126130.1, Ppup130400.1, Ppup135110.1, Ppup141…
GO:0030968	BP	e	endoplasmic reticulum unfolded protein response	11/2424	22/10157	0.00931098	5	11	0.197492	Ppup021070.1, Ppup021150.1, Ppup031560.1, Ppup038210.1, Ppup048420.1, Ppup070550.1, Ppup087100.1, Ppup094800.1, Ppup114920.1, Ppup116770.1, Ppup126800.1
GO:0032272	BP	e	negative regulation of protein polymerization	11/2424	22/10157	0.00931098	7	11	0.197492	Ppup005490.1, Ppup009190.1, Ppup064390.1, Ppup077190.1, Ppup080260.1, Ppup084280.1, Ppup084510.1, Ppup114260.1, Ppup126790.1, Ppup142060.1, Ppup150900.1
GO:0010563	BP	e	negative regulation of phosphorus metabolic process	44/2424	130/10157	0.00941266	6	44	0.198894	Ppup006720.1, Ppup010070.1, Ppup014250.1, Ppup041140.1, Ppup052760.1, Ppup053660.1, Ppup053970.1, Ppup054230.1, Ppup057830.1, Ppup058220.1, Ppup058670.1, Ppup075230.1, Ppup075720.1, Ppup083600.1, Ppup087280.1, Ppup094070.1, Ppup096980.1, Ppup099800.1, Ppup101030.1, Ppup104470.1, Ppup109280.1, Ppup111590.1, Ppup112100.1, Ppup115210.1, Ppup115500.1, Ppup116770.1, Ppup119520.1, Ppup121540.1, Ppup123…
GO:0045936	BP	e	negative regulation of phosphate metabolic process	44/2424	130/10157	0.00941266	7	44	0.198894	Ppup006720.1, Ppup010070.1, Ppup014250.1, Ppup041140.1, Ppup052760.1, Ppup053660.1, Ppup053970.1, Ppup054230.1, Ppup057830.1, Ppup058220.1, Ppup058670.1, Ppup075230.1, Ppup075720.1, Ppup083600.1, Ppup087280.1, Ppup094070.1, Ppup096980.1, Ppup099800.1, Ppup101030.1, Ppup104470.1, Ppup109280.1, Ppup111590.1, Ppup112100.1, Ppup115210.1, Ppup115500.1, Ppup116770.1, Ppup119520.1, Ppup121540.1, Ppup123…
GO:0031060	BP	e	regulation of histone methylation	14/2424	31/10157	0.00971576	9	14	0.204911	Ppup018270.1, Ppup019810.1, Ppup033420.1, Ppup035890.1, Ppup037880.1, Ppup039960.1, Ppup049720.1, Ppup061660.1, Ppup080180.1, Ppup091670.1, Ppup108340.1, Ppup123820.1, Ppup133560.1, Ppup176270.1
GO:0007264	BP	e	small GTPase mediated signal transduction	36/2424	102/10157	0.00973427	6	36	0.204915	Ppup010070.1, Ppup016230.1, Ppup020290.1, Ppup022170.1, Ppup028260.1, Ppup042150.1, Ppup044130.1, Ppup046770.1, Ppup049760.1, Ppup052220.1, Ppup058460.1, Ppup065980.1, Ppup074730.1, Ppup075410.1, Ppup075720.1, Ppup076820.1, Ppup084350.1, Ppup086470.1, Ppup086670.1, Ppup095200.1, Ppup099660.1, Ppup102180.1, Ppup106330.1, Ppup107050.1, Ppup108120.1, Ppup113560.1, Ppup123220.1, Ppup124890.1, Ppup125…
GO:0042594	BP	e	response to starvation	39/2424	112/10157	0.00987005	5	39	0.207382	Ppup005940.1, Ppup009730.1, Ppup012590.1, Ppup016190.1, Ppup021150.1, Ppup021300.1, Ppup022290.1, Ppup026550.1, Ppup027200.1, Ppup028400.1, Ppup035420.1, Ppup046770.1, Ppup046980.1, Ppup058440.1, Ppup069310.1, Ppup076300.1, Ppup076900.1, Ppup084770.1, Ppup092000.1, Ppup110950.1, Ppup112480.1, Ppup116700.1, Ppup119520.1, Ppup122880.1, Ppup126550.1, Ppup126660.1, Ppup133890.1, Ppup134150.1, Ppup138…
GO:1903050	BP	e	regulation of proteolysis involved in cellular protein catabolic process	28/2424	76/10157	0.010125	8	28	0.20814	Ppup001710.1, Ppup004410.1, Ppup005320.1, Ppup008760.1, Ppup011260.1, Ppup020080.1, Ppup025910.1, Ppup037330.1, Ppup037560.1, Ppup038210.1, Ppup046570.1, Ppup049010.1, Ppup050100.1, Ppup052760.1, Ppup075920.1, Ppup076390.1, Ppup094610.1, Ppup095620.1, Ppup114460.1, Ppup117270.1, Ppup122830.1, Ppup127830.1, Ppup130220.1, Ppup140310.1, Ppup146570.1, Ppup160690.1, Ppup172490.1, Ppup176270.1
GO:0046460	BP	e	neutral lipid biosynthetic process	5/2424	7/10157	0.0104275	6	5	0.20814	Ppup062660.1, Ppup092170.1, Ppup137390.1, Ppup153110.1, Ppup162420.1
GO:0034436	BP	e	glycoprotein transport	5/2424	7/10157	0.0104275	8	5	0.20814	Ppup043200.1, Ppup104600.1, Ppup109420.1, Ppup109430.1, Ppup122750.1
GO:0052646	BP	e	alditol phosphate metabolic process	5/2424	7/10157	0.0104275	5	5	0.20814	Ppup082890.1, Ppup113500.1, Ppup136110.1, Ppup153110.1, Ppup157240.1
GO:0071545	BP	e	inositol phosphate catabolic process	5/2424	7/10157	0.0104275	7	5	0.20814	Ppup006440.1, Ppup020690.1, Ppup094070.1, Ppup134680.1, Ppup163850.1
GO:0006337	BP	e	nucleosome disassembly	5/2424	7/10157	0.0104275	7	5	0.20814	Ppup018890.1, Ppup025700.1, Ppup097650.1, Ppup104630.1, Ppup133840.1
GO:0033962	BP	e	cytoplasmic mRNA processing body assembly	5/2424	7/10157	0.0104275	6	5	0.20814	Ppup026790.1, Ppup027520.1, Ppup050410.1, Ppup103260.1, Ppup109030.1
GO:0046838	BP	e	phosphorylated carbohydrate dephosphorylation	5/2424	7/10157	0.0104275	6	5	0.20814	Ppup006440.1, Ppup020690.1, Ppup094070.1, Ppup134680.1, Ppup163850.1
GO:0048169	BP	e	regulation of long-term neuronal synaptic plasticity	5/2424	7/10157	0.0104275	9	5	0.20814	Ppup004150.1, Ppup075410.1, Ppup098040.1, Ppup106330.1, Ppup113560.1
GO:0010867	BP	e	positive regulation of triglyceride biosynthetic process	5/2424	7/10157	0.0104275	8	5	0.20814	Ppup047250.1, Ppup060140.1, Ppup075750.1, Ppup153110.1, Ppup162270.1
GO:0043650	BP	e	dicarboxylic acid biosynthetic process	5/2424	7/10157	0.0104275	7	5	0.20814	Ppup085610.1, Ppup137610.1, Ppup145850.1, Ppup156530.1, Ppup176440.1
GO:0070886	BP	e	positive regulation of calcineurin-NFAT signaling cascade	5/2424	7/10157	0.0104275	10	5	0.20814	Ppup004550.1, Ppup059950.1, Ppup097670.1, Ppup109830.1, Ppup109840.1
GO:0006072	BP	e	glycerol-3-phosphate metabolic process	5/2424	7/10157	0.0104275	6	5	0.20814	Ppup082890.1, Ppup113500.1, Ppup136110.1, Ppup153110.1, Ppup157240.1
GO:0106058	BP	e	positive regulation of calcineurin-mediated signaling	5/2424	7/10157	0.0104275	9	5	0.20814	Ppup004550.1, Ppup059950.1, Ppup097670.1, Ppup109830.1, Ppup109840.1
GO:0010875	BP	e	positive regulation of cholesterol efflux	5/2424	7/10157	0.0104275	9	5	0.20814	Ppup043200.1, Ppup054230.1, Ppup104600.1, Ppup109420.1, Ppup109430.1
GO:0042940	BP	e	D-amino acid transport	5/2424	7/10157	0.0104275	9	5	0.20814	Ppup063970.1, Ppup085610.1, Ppup086080.1, Ppup106580.1, Ppup153300.1
GO:0045923	BP	e	positive regulation of fatty acid metabolic process	5/2424	7/10157	0.0104275	7	5	0.20814	Ppup005940.1, Ppup011120.1, Ppup025880.1, Ppup046270.1, Ppup052580.1
GO:0050850	BP	e	positive regulation of calcium-mediated signaling	5/2424	7/10157	0.0104275	8	5	0.20814	Ppup004550.1, Ppup059950.1, Ppup097670.1, Ppup109830.1, Ppup109840.1
GO:0089718	BP	e	amino acid import across plasma membrane	5/2424	7/10157	0.0104275	10	5	0.20814	Ppup004420.1, Ppup085610.1, Ppup086080.1, Ppup106580.1, Ppup154630.1
GO:0042304	BP	e	regulation of fatty acid biosynthetic process	5/2424	7/10157	0.0104275	7	5	0.20814	Ppup011120.1, Ppup046270.1, Ppup051070.1, Ppup106130.1, Ppup171790.1
GO:0045599	BP	e	negative regulation of fat cell differentiation	5/2424	7/10157	0.0104275	6	5	0.20814	Ppup005320.1, Ppup005940.1, Ppup026960.1, Ppup028100.1, Ppup054230.1
GO:0046855	BP	e	inositol phosphate dephosphorylation	5/2424	7/10157	0.0104275	8	5	0.20814	Ppup006440.1, Ppup020690.1, Ppup094070.1, Ppup134680.1, Ppup163850.1
GO:0008053	BP	e	mitochondrial fusion	5/2424	7/10157	0.0104275	6	5	0.20814	Ppup028300.1, Ppup075690.1, Ppup095230.1, Ppup112300.1, Ppup141950.1
GO:0046463	BP	e	acylglycerol biosynthetic process	5/2424	7/10157	0.0104275	7	5	0.20814	Ppup062660.1, Ppup092170.1, Ppup137390.1, Ppup153110.1, Ppup162420.1
GO:0032986	BP	e	protein-DNA complex disassembly	5/2424	7/10157	0.0104275	6	5	0.20814	Ppup018890.1, Ppup025700.1, Ppup097650.1, Ppup104630.1, Ppup133840.1
GO:1905038	BP	e	regulation of membrane lipid metabolic process	5/2424	7/10157	0.0104275	6	5	0.20814	Ppup017930.1, Ppup058400.1, Ppup110130.1, Ppup140050.1, Ppup160900.1
GO:0097009	BP	e	energy homeostasis	5/2424	7/10157	0.0104275	5	5	0.20814	Ppup057830.1, Ppup062320.1, Ppup064880.1, Ppup126890.1, Ppup171790.1
GO:0031529	BP	e	ruffle organization	5/2424	7/10157	0.0104275	6	5	0.20814	Ppup086470.1, Ppup094070.1, Ppup147010.1, Ppup165030.1, Ppup169680.1
GO:0006470	BP	e	protein dephosphorylation	20/2424	49/10157	0.010496	7	20	0.209134	Ppup008760.1, Ppup014250.1, Ppup020690.1, Ppup025970.1, Ppup027240.1, Ppup028400.1, Ppup030870.1, Ppup050270.1, Ppup050810.1, Ppup062600.1, Ppup070550.1, Ppup070580.1, Ppup075750.1, Ppup086620.1, Ppup095740.1, Ppup099800.1, Ppup110470.1, Ppup115930.1, Ppup123560.1, Ppup126560.1
GO:0010821	BP	e	regulation of mitochondrion organization	18/2424	43/10157	0.0106559	6	18	0.211565	Ppup017930.1, Ppup027250.1, Ppup029460.1, Ppup043150.1, Ppup047070.1, Ppup048770.1, Ppup050170.1, Ppup057830.1, Ppup062320.1, Ppup075690.1, Ppup093500.1, Ppup095230.1, Ppup101240.1, Ppup123000.1, Ppup140310.1, Ppup141950.1, Ppup153590.1, Ppup169820.1
GO:0050727	BP	e	regulation of inflammatory response	18/2424	43/10157	0.0106559	6	18	0.211565	Ppup011120.1, Ppup022030.1, Ppup044250.1, Ppup045480.1, Ppup054230.1, Ppup083600.1, Ppup109060.1, Ppup111590.1, Ppup116890.1, Ppup120030.1, Ppup123000.1, Ppup140310.1, Ppup160680.1, Ppup160690.1, Ppup162360.1, Ppup168100.1, Ppup172340.1, Ppup174310.1
GO:0046470	BP	e	phosphatidylcholine metabolic process	7/2424	12/10157	0.0109079	7	7	0.213051	Ppup030030.1, Ppup044790.1, Ppup092170.1, Ppup094670.1, Ppup115200.1, Ppup160290.1, Ppup162420.1
GO:0070861	BP	e	regulation of protein exit from endoplasmic reticulum	7/2424	12/10157	0.0109079	8	7	0.213051	Ppup038210.1, Ppup094530.1, Ppup130220.1, Ppup141160.1, Ppup145250.1, Ppup145260.1, Ppup172490.1
GO:0106118	BP	e	regulation of sterol biosynthetic process	7/2424	12/10157	0.0109079	8	7	0.213051	Ppup043200.1, Ppup045850.1, Ppup102180.1, Ppup104600.1, Ppup109420.1, Ppup109430.1, Ppup126800.1
GO:0098815	BP	e	modulation of excitatory postsynaptic potential	7/2424	12/10157	0.0109079	7	7	0.213051	Ppup004150.1, Ppup010280.1, Ppup020690.1, Ppup050970.1, Ppup052260.1, Ppup098040.1, Ppup145860.1
GO:0099637	BP	e	neurotransmitter receptor transport	7/2424	12/10157	0.0109079	8	7	0.213051	Ppup004540.1, Ppup075410.1, Ppup092470.1, Ppup106330.1, Ppup135110.1, Ppup137460.1, Ppup140190.1
GO:0090659	BP	e	walking behavior	7/2424	12/10157	0.0109079	3	7	0.213051	Ppup005470.1, Ppup037560.1, Ppup059350.1, Ppup094290.1, Ppup144880.1, Ppup160840.1, Ppup173320.1
GO:0090208	BP	e	positive regulation of triglyceride metabolic process	7/2424	12/10157	0.0109079	7	7	0.213051	Ppup021300.1, Ppup047250.1, Ppup060140.1, Ppup075750.1, Ppup140980.1, Ppup153110.1, Ppup162270.1
GO:0045540	BP	e	regulation of cholesterol biosynthetic process	7/2424	12/10157	0.0109079	9	7	0.213051	Ppup043200.1, Ppup045850.1, Ppup102180.1, Ppup104600.1, Ppup109420.1, Ppup109430.1, Ppup126800.1
GO:0009615	BP	e	response to virus	24/2424	63/10157	0.0111926	5	24	0.217584	Ppup010940.1, Ppup019150.1, Ppup027200.1, Ppup027520.1, Ppup053410.1, Ppup058840.1, Ppup082030.1, Ppup083610.1, Ppup101230.1, Ppup101240.1, Ppup106080.1, Ppup110010.1, Ppup112100.1, Ppup116340.1, Ppup116370.1, Ppup116770.1, Ppup117200.1, Ppup122190.1, Ppup139070.1, Ppup139080.1, Ppup140720.1, Ppup146400.1, Ppup153110.1, Ppup161610.1
GO:0040029	BP	e	regulation of gene expression, epigenetic	40/2424	116/10157	0.0112477	6	40	0.218275	Ppup003930.1, Ppup013200.1, Ppup018600.1, Ppup018870.1, Ppup021070.1, Ppup022280.1, Ppup025760.1, Ppup025920.1, Ppup027520.1, Ppup033420.1, Ppup035070.1, Ppup035260.1, Ppup039420.1, Ppup040370.1, Ppup040380.1, Ppup043580.1, Ppup050210.1, Ppup050410.1, Ppup052490.1, Ppup053830.1, Ppup062360.1, Ppup064000.1, Ppup074280.1, Ppup086780.1, Ppup096090.1, Ppup103700.1, Ppup104340.1, Ppup104550.1, Ppup123…
GO:0002791	BP	e	regulation of peptide secretion	34/2424	97/10157	0.0118231	6	34	0.228823	Ppup002780.1, Ppup005940.1, Ppup010280.1, Ppup011470.1, Ppup014360.1, Ppup017930.1, Ppup024510.1, Ppup025880.1, Ppup026960.1, Ppup027680.1, Ppup043200.1, Ppup057910.1, Ppup062600.1, Ppup069310.1, Ppup074160.1, Ppup075960.1, Ppup082790.1, Ppup086470.1, Ppup104600.1, Ppup108180.1, Ppup109260.1, Ppup109420.1, Ppup109430.1, Ppup111590.1, Ppup133890.1, Ppup137390.1, Ppup138910.1, Ppup139120.1, Ppup144…
GO:0019221	BP	e	cytokine-mediated signaling pathway	13/2424	28/10157	0.012095	6	13	0.232071	Ppup008760.1, Ppup019100.1, Ppup019160.1, Ppup024220.1, Ppup027810.1, Ppup048770.1, Ppup094800.1, Ppup112100.1, Ppup114980.1, Ppup114990.1, Ppup138910.1, Ppup162290.1, Ppup167810.1
GO:0007622	BP	e	rhythmic behavior	13/2424	28/10157	0.012095	2	13	0.232071	Ppup018590.1, Ppup040750.1, Ppup040930.1, Ppup045860.1, Ppup058840.1, Ppup064000.1, Ppup104550.1, Ppup109360.1, Ppup130180.1, Ppup130440.1, Ppup143520.1, Ppup144280.1, Ppup168340.1
GO:0007498	BP	e	mesoderm development	13/2424	28/10157	0.012095	4	13	0.232071	Ppup003910.1, Ppup018590.1, Ppup021490.1, Ppup031020.1, Ppup043740.1, Ppup084440.1, Ppup086350.1, Ppup096760.1, Ppup114470.1, Ppup122960.1, Ppup143220.1, Ppup143230.1, Ppup152140.1
GO:0046939	BP	e	nucleotide phosphorylation	13/2424	28/10157	0.012095	6	13	0.232071	Ppup009900.1, Ppup026550.1, Ppup039110.1, Ppup040860.1, Ppup074930.1, Ppup075960.1, Ppup117160.1, Ppup119950.1, Ppup122750.1, Ppup123890.1, Ppup152140.1, Ppup162500.1, Ppup167240.1
GO:0010810	BP	e	regulation of cell-substrate adhesion	18/2424	44/10157	0.0121179	5	18	0.232071	Ppup003910.1, Ppup005490.1, Ppup020230.1, Ppup027280.1, Ppup036080.1, Ppup036980.1, Ppup042910.1, Ppup057310.1, Ppup083090.1, Ppup084230.1, Ppup086470.1, Ppup116890.1, Ppup122670.1, Ppup125270.1, Ppup134010.1, Ppup146370.1, Ppup156210.1, Ppup162080.1
GO:0034612	BP	e	response to tumor necrosis factor	14/2424	32/10157	0.012162	5	14	0.232071	Ppup022030.1, Ppup043580.1, Ppup075430.1, Ppup086420.1, Ppup094070.1, Ppup112100.1, Ppup112420.1, Ppup115100.1, Ppup124670.1, Ppup140310.1, Ppup143800.1, Ppup146980.1, Ppup160680.1, Ppup168100.1
GO:0048872	BP	e	homeostasis of number of cells	14/2424	32/10157	0.012162	4	14	0.232071	Ppup021070.1, Ppup026790.1, Ppup039560.1, Ppup048850.1, Ppup061630.1, Ppup062600.1, Ppup094310.1, Ppup104560.1, Ppup130950.1, Ppup140230.1, Ppup145860.1, Ppup162360.1, Ppup165510.1, Ppup174910.1
GO:1905897	BP	e	regulation of response to endoplasmic reticulum stress	11/2424	23/10157	0.0122077	6	11	0.232071	Ppup008700.1, Ppup020080.1, Ppup021150.1, Ppup038210.1, Ppup114920.1, Ppup116770.1, Ppup122830.1, Ppup130220.1, Ppup146570.1, Ppup160690.1, Ppup172490.1
GO:0032922	BP	e	circadian regulation of gene expression	11/2424	23/10157	0.0122077	6	11	0.232071	Ppup001800.1, Ppup003620.1, Ppup010190.1, Ppup026960.1, Ppup037330.1, Ppup058370.1, Ppup059960.1, Ppup104550.1, Ppup143520.1, Ppup144280.1, Ppup176270.1
GO:0043242	BP	e	negative regulation of protein-containing complex disassembly	11/2424	23/10157	0.0122077	6	11	0.232071	Ppup009190.1, Ppup024160.1, Ppup043440.1, Ppup064390.1, Ppup087280.1, Ppup106040.1, Ppup114260.1, Ppup126790.1, Ppup142060.1, Ppup150900.1, Ppup165030.1
GO:0008593	BP	e	regulation of Notch signaling pathway	16/2424	38/10157	0.0123533	6	16	0.232102	Ppup006490.1, Ppup035920.1, Ppup040010.1, Ppup046070.1, Ppup050680.1, Ppup064850.1, Ppup086420.1, Ppup103270.1, Ppup104560.1, Ppup104710.1, Ppup109360.1, Ppup111640.1, Ppup124670.1, Ppup130440.1, Ppup137460.1, Ppup152410.1
GO:0045927	BP	e	positive regulation of growth	35/2424	100/10157	0.0127245	4	35	0.232102	Ppup008680.1, Ppup037540.1, Ppup038210.1, Ppup039090.1, Ppup040580.1, Ppup042930.1, Ppup046070.1, Ppup046770.1, Ppup048090.1, Ppup048850.1, Ppup048860.1, Ppup065950.1, Ppup074880.1, Ppup075410.1, Ppup077340.1, Ppup086420.1, Ppup090610.1, Ppup090820.1, Ppup094460.1, Ppup109360.1, Ppup120140.1, Ppup124670.1, Ppup126170.1, Ppup137390.1, Ppup139120.1, Ppup144880.1, Ppup144960.1, Ppup144970.1, Ppup145…
GO:0006687	BP	e	glycosphingolipid metabolic process	8/2424	15/10157	0.0129614	7	8	0.232102	Ppup001870.1, Ppup004080.1, Ppup029370.1, Ppup086980.1, Ppup127210.1, Ppup138760.1, Ppup140310.1, Ppup173320.1
GO:0007549	BP	e	dosage compensation	8/2424	15/10157	0.0129614	7	8	0.232102	Ppup025920.1, Ppup033420.1, Ppup035260.1, Ppup052490.1, Ppup062360.1, Ppup074280.1, Ppup096090.1, Ppup103700.1
GO:0010827	BP	e	regulation of glucose transmembrane transport	8/2424	15/10157	0.0129614	6	8	0.232102	Ppup036980.1, Ppup062600.1, Ppup075760.1, Ppup086080.1, Ppup094070.1, Ppup103510.1, Ppup106330.1, Ppup157280.1
GO:0019217	BP	e	regulation of fatty acid metabolic process	8/2424	15/10157	0.0129614	6	8	0.232102	Ppup005940.1, Ppup011120.1, Ppup025880.1, Ppup046270.1, Ppup051070.1, Ppup052580.1, Ppup106130.1, Ppup171790.1
GO:0042982	BP	e	amyloid precursor protein metabolic process	8/2424	15/10157	0.0129614	5	8	0.232102	Ppup004080.1, Ppup043200.1, Ppup086420.1, Ppup104600.1, Ppup109420.1, Ppup109430.1, Ppup120560.1, Ppup124670.1
GO:0046174	BP	e	polyol catabolic process	8/2424	15/10157	0.0129614	6	8	0.232102	Ppup006440.1, Ppup020690.1, Ppup094070.1, Ppup113500.1, Ppup134680.1, Ppup136110.1, Ppup157240.1, Ppup163850.1
GO:0005979	BP	e	regulation of glycogen biosynthetic process	4/2424	5/10157	0.013102	9	4	0.232102	Ppup094070.1, Ppup103510.1, Ppup123340.1, Ppup145020.1
GO:2001039	BP	e	negative regulation of cellular response to drug	4/2424	5/10157	0.013102	6	4	0.232102	Ppup027490.1, Ppup084440.1, Ppup124080.1, Ppup173320.1
GO:1904668	BP	e	positive regulation of ubiquitin protein ligase activity	4/2424	5/10157	0.013102	12	4	0.232102	Ppup018680.1, Ppup053660.1, Ppup079510.1, Ppup139970.1
GO:0000491	BP	e	small nucleolar ribonucleoprotein complex assembly	4/2424	5/10157	0.013102	8	4	0.232102	Ppup023730.1, Ppup048450.1, Ppup054080.1, Ppup111720.1
GO:0090309	BP	e	positive regulation of DNA methylation-dependent heterochromatin assembly	4/2424	5/10157	0.013102	12	4	0.232102	Ppup016230.1, Ppup080180.1, Ppup143120.1, Ppup145760.1
GO:0010962	BP	e	regulation of glucan biosynthetic process	4/2424	5/10157	0.013102	8	4	0.232102	Ppup094070.1, Ppup103510.1, Ppup123340.1, Ppup145020.1
GO:0016333	BP	e	morphogenesis of follicular epithelium	4/2424	5/10157	0.013102	5	4	0.232102	Ppup041140.1, Ppup086980.1, Ppup109360.1, Ppup137460.1
GO:0030038	BP	e	contractile actin filament bundle assembly	4/2424	5/10157	0.013102	8	4	0.232102	Ppup020360.1, Ppup020370.1, Ppup103510.1, Ppup126130.1
GO:0009448	BP	e	gamma-aminobutyric acid metabolic process	4/2424	5/10157	0.013102	7	4	0.232102	Ppup029370.1, Ppup037640.1, Ppup055840.1, Ppup085610.1
GO:0019432	BP	e	triglyceride biosynthetic process	4/2424	5/10157	0.013102	8	4	0.232102	Ppup092170.1, Ppup137390.1, Ppup153110.1, Ppup162420.1
GO:0035640	BP	e	exploration behavior	4/2424	5/10157	0.013102	2	4	0.232102	Ppup010280.1, Ppup038960.1, Ppup044730.1, Ppup098040.1
GO:1900543	BP	e	negative regulation of purine nucleotide metabolic process	4/2424	5/10157	0.013102	9	4	0.232102	Ppup052760.1, Ppup057830.1, Ppup125780.1, Ppup160690.1
GO:1903206	BP	e	negative regulation of hydrogen peroxide-induced cell death	4/2424	5/10157	0.013102	9	4	0.232102	Ppup027490.1, Ppup084440.1, Ppup124080.1, Ppup173320.1
GO:0035973	BP	e	aggrephagy	4/2424	5/10157	0.013102	7	4	0.232102	Ppup019820.1, Ppup048770.1, Ppup122830.1, Ppup173600.1
GO:0007418	BP	e	ventral midline development	4/2424	5/10157	0.013102	3	4	0.232102	Ppup059350.1, Ppup094290.1, Ppup095780.1, Ppup160840.1
GO:0015881	BP	e	creatine transmembrane transport	4/2424	5/10157	0.013102	9	4	0.232102	Ppup074560.1, Ppup074640.1, Ppup127000.1, Ppup133180.1
GO:0090308	BP	e	regulation of DNA methylation-dependent heterochromatin assembly	4/2424	5/10157	0.013102	11	4	0.232102	Ppup016230.1, Ppup080180.1, Ppup143120.1, Ppup145760.1
GO:0098581	BP	e	detection of external biotic stimulus	4/2424	5/10157	0.013102	4	4	0.232102	Ppup035960.1, Ppup047250.1, Ppup060140.1, Ppup162270.1
GO:0043149	BP	e	stress fiber assembly	4/2424	5/10157	0.013102	9	4	0.232102	Ppup020360.1, Ppup020370.1, Ppup103510.1, Ppup126130.1
GO:0001675	BP	e	acrosome assembly	4/2424	5/10157	0.013102	7	4	0.232102	Ppup007260.1, Ppup085140.1, Ppup130400.1, Ppup141930.1
GO:1901032	BP	e	negative regulation of response to reactive oxygen species	4/2424	5/10157	0.013102	7	4	0.232102	Ppup027490.1, Ppup084440.1, Ppup124080.1, Ppup173320.1
GO:0038202	BP	e	TORC1 signaling	4/2424	5/10157	0.013102	7	4	0.232102	Ppup021300.1, Ppup046980.1, Ppup076900.1, Ppup139120.1
GO:0032885	BP	e	regulation of polysaccharide biosynthetic process	4/2424	5/10157	0.013102	7	4	0.232102	Ppup094070.1, Ppup103510.1, Ppup123340.1, Ppup145020.1
GO:0015813	BP	e	L-glutamate transmembrane transport	4/2424	5/10157	0.013102	11	4	0.232102	Ppup077110.1, Ppup085610.1, Ppup086080.1, Ppup106580.1
GO:0007297	BP	e	ovarian follicle cell migration	20/2424	51/10157	0.0132774	7	20	0.232102	Ppup011200.1, Ppup021210.1, Ppup027500.1, Ppup048860.1, Ppup058840.1, Ppup075720.1, Ppup085930.1, Ppup086980.1, Ppup097400.1, Ppup104330.1, Ppup110820.1, Ppup114050.1, Ppup117200.1, Ppup120340.1, Ppup135110.1, Ppup150900.1, Ppup165510.1, Ppup168280.1, Ppup169780.1, Ppup171780.1
GO:0009064	BP	e	glutamine family amino acid metabolic process	20/2424	51/10157	0.0132774	8	20	0.232102	Ppup010470.1, Ppup022030.1, Ppup029370.1, Ppup037640.1, Ppup050190.1, Ppup052590.1, Ppup055840.1, Ppup085610.1, Ppup105390.1, Ppup125730.1, Ppup125740.1, Ppup126370.1, Ppup126380.1, Ppup133900.1, Ppup145850.1, Ppup156530.1, Ppup160680.1, Ppup161150.1, Ppup168100.1, Ppup176440.1
GO:0007041	BP	e	lysosomal transport	20/2424	51/10157	0.0132774	5	20	0.232102	Ppup003070.1, Ppup019690.1, Ppup020500.1, Ppup022310.1, Ppup027870.1, Ppup029460.1, Ppup031510.1, Ppup035330.1, Ppup075190.1, Ppup082200.1, Ppup082620.1, Ppup086320.1, Ppup091320.1, Ppup112480.1, Ppup125670.1, Ppup126550.1, Ppup151270.1, Ppup152050.1, Ppup164060.1, Ppup173320.1
GO:0090276	BP	e	regulation of peptide hormone secretion	20/2424	51/10157	0.0132774	8	20	0.232102	Ppup005940.1, Ppup010280.1, Ppup011470.1, Ppup014360.1, Ppup017930.1, Ppup025880.1, Ppup026960.1, Ppup062600.1, Ppup069310.1, Ppup075960.1, Ppup086470.1, Ppup108180.1, Ppup109260.1, Ppup137390.1, Ppup138910.1, Ppup139120.1, Ppup144880.1, Ppup146980.1, Ppup149470.1, Ppup165290.1
GO:0032446	BP	e	protein modification by small protein conjugation	115/2424	394/10157	0.0133641	8	115	0.232102	Ppup001720.1, Ppup001730.1, Ppup002450.1, Ppup002900.1, Ppup003610.1, Ppup004410.1, Ppup004570.1, Ppup008630.1, Ppup008760.1, Ppup012830.1, Ppup013200.1, Ppup018680.1, Ppup018870.1, Ppup019010.1, Ppup020080.1, Ppup023000.1, Ppup023070.1, Ppup023680.1, Ppup024220.1, Ppup024570.1, Ppup025110.1, Ppup025910.1, Ppup026790.1, Ppup028140.1, Ppup031660.1, Ppup033270.1, Ppup039050.1, Ppup039790.1, Ppup040…
GO:0006417	BP	e	regulation of translation	54/2424	168/10157	0.0135686	7	54	0.232102	Ppup003740.1, Ppup006720.1, Ppup016860.1, Ppup020310.1, Ppup021150.1, Ppup026790.1, Ppup027120.1, Ppup027280.1, Ppup027490.1, Ppup027520.1, Ppup040010.1, Ppup043500.1, Ppup046770.1, Ppup050410.1, Ppup057750.1, Ppup062590.1, Ppup063480.1, Ppup064000.1, Ppup069240.1, Ppup074180.1, Ppup074810.1, Ppup076830.1, Ppup076900.1, Ppup077340.1, Ppup080190.1, Ppup084660.1, Ppup085930.1, Ppup086780.1, Ppup095…
GO:0015802	BP	e	basic amino acid transport	3/2424	3/10157	0.0135798	9	3	0.232102	Ppup004080.1, Ppup130380.1, Ppup154630.1
GO:0000492	BP	e	box C/D snoRNP assembly	3/2424	3/10157	0.0135798	9	3	0.232102	Ppup048450.1, Ppup054080.1, Ppup111720.1
GO:0030388	BP	e	fructose 1,6-bisphosphate metabolic process	3/2424	3/10157	0.0135798	5	3	0.232102	Ppup125780.1, Ppup152140.1, Ppup162500.1
GO:0010819	BP	e	regulation of T cell chemotaxis	3/2424	3/10157	0.0135798	10	3	0.232102	Ppup027810.1, Ppup086420.1, Ppup124670.1
GO:0010961	BP	e	cellular magnesium ion homeostasis	3/2424	3/10157	0.0135798	9	3	0.232102	Ppup004140.1, Ppup093110.1, Ppup093120.1
GO:0001178	BP	e	regulation of transcriptional start site selection at RNA polymerase II promoter	3/2424	3/10157	0.0135798	12	3	0.232102	Ppup010940.1, Ppup046960.1, Ppup134050.1
GO:0010820	BP	e	positive regulation of T cell chemotaxis	3/2424	3/10157	0.0135798	11	3	0.232102	Ppup027810.1, Ppup086420.1, Ppup124670.1
GO:0008302	BP	e	female germline ring canal formation, actin assembly	3/2424	3/10157	0.0135798	6	3	0.232102	Ppup101280.1, Ppup139640.1, Ppup142060.1
GO:0090650	BP	e	cellular response to oxygen-glucose deprivation	3/2424	3/10157	0.0135798	6	3	0.232102	Ppup027280.1, Ppup094510.1, Ppup152000.1
GO:0061615	BP	e	glycolytic process through fructose-6-phosphate	3/2424	3/10157	0.0135798	13	3	0.232102	Ppup026550.1, Ppup123890.1, Ppup162500.1
GO:0097720	BP	e	calcineurin-mediated signaling	3/2424	3/10157	0.0135798	8	3	0.232102	Ppup027240.1, Ppup038890.1, Ppup050810.1
GO:0006681	BP	e	galactosylceramide metabolic process	3/2424	3/10157	0.0135798	9	3	0.232102	Ppup004080.1, Ppup029370.1, Ppup173320.1
GO:1903715	BP	e	regulation of aerobic respiration	3/2424	3/10157	0.0135798	7	3	0.232102	Ppup052760.1, Ppup063940.1, Ppup101240.1
GO:1901142	BP	e	insulin metabolic process	3/2424	3/10157	0.0135798	5	3	0.232102	Ppup005940.1, Ppup010280.1, Ppup063940.1
GO:0051561	BP	e	positive regulation of mitochondrial calcium ion concentration	3/2424	3/10157	0.0135798	11	3	0.232102	Ppup095230.1, Ppup101240.1, Ppup127980.1
GO:0035864	BP	e	response to potassium ion	3/2424	3/10157	0.0135798	5	3	0.232102	Ppup071180.1, Ppup140860.1, Ppup146980.1
GO:0035641	BP	e	locomotory exploration behavior	3/2424	3/10157	0.0135798	3	3	0.232102	Ppup010280.1, Ppup044730.1, Ppup098040.1
GO:0061620	BP	e	glycolytic process through glucose-6-phosphate	3/2424	3/10157	0.0135798	14	3	0.232102	Ppup026550.1, Ppup123890.1, Ppup162500.1
GO:0090649	BP	e	response to oxygen-glucose deprivation	3/2424	3/10157	0.0135798	5	3	0.232102	Ppup027280.1, Ppup094510.1, Ppup152000.1
GO:0044030	BP	e	regulation of DNA methylation	3/2424	3/10157	0.0135798	7	3	0.232102	Ppup001800.1, Ppup005470.1, Ppup127650.1
GO:0044154	BP	e	histone H3-K14 acetylation	3/2424	3/10157	0.0135798	13	3	0.232102	Ppup014100.1, Ppup043580.1, Ppup105670.1
GO:0140131	BP	e	positive regulation of lymphocyte chemotaxis	3/2424	3/10157	0.0135798	10	3	0.232102	Ppup027810.1, Ppup086420.1, Ppup124670.1
GO:0006015	BP	e	5-phosphoribose 1-diphosphate biosynthetic process	3/2424	3/10157	0.0135798	7	3	0.232102	Ppup001740.1, Ppup005850.1, Ppup071520.1
GO:0098792	BP	e	xenophagy	3/2424	3/10157	0.0135798	7	3	0.232102	Ppup049570.1, Ppup053410.1, Ppup084770.1
GO:0099576	BP	e	regulation of protein catabolic process at postsynapse, modulating synaptic transmission	3/2424	3/10157	0.0135798	8	3	0.232102	Ppup049010.1, Ppup123220.1, Ppup137540.1
GO:0061635	BP	e	regulation of protein complex stability	3/2424	3/10157	0.0135798	3	3	0.232102	Ppup048770.1, Ppup057460.1, Ppup126550.1
GO:0015809	BP	e	arginine transport	3/2424	3/10157	0.0135798	10	3	0.232102	Ppup004080.1, Ppup130380.1, Ppup154630.1
GO:0046391	BP	e	5-phosphoribose 1-diphosphate metabolic process	3/2424	3/10157	0.0135798	6	3	0.232102	Ppup001740.1, Ppup005850.1, Ppup071520.1
GO:0042592	BP	e	homeostatic process	150/2424	529/10157	0.0138295	3	150	0.235702	Ppup001870.1, Ppup002250.1, Ppup003230.1, Ppup004080.1, Ppup004140.1, Ppup006500.1, Ppup007260.1, Ppup008700.1, Ppup009820.1, Ppup009830.1, Ppup009900.1, Ppup010330.1, Ppup011380.1, Ppup017930.1, Ppup019200.1, Ppup020100.1, Ppup020860.1, Ppup021070.1, Ppup021350.1, Ppup021490.1, Ppup025700.1, Ppup025890.1, Ppup026440.1, Ppup026550.1, Ppup026790.1, Ppup028280.1, Ppup028600.1, Ppup029430.1, Ppup030…
GO:0019725	BP	e	cellular homeostasis	78/2424	255/10157	0.0138537	4	78	0.235702	Ppup001870.1, Ppup003230.1, Ppup004080.1, Ppup004140.1, Ppup006500.1, Ppup008700.1, Ppup009820.1, Ppup009900.1, Ppup010330.1, Ppup017930.1, Ppup019200.1, Ppup020100.1, Ppup020860.1, Ppup021350.1, Ppup021490.1, Ppup025890.1, Ppup026550.1, Ppup028280.1, Ppup029430.1, Ppup039980.1, Ppup040410.1, Ppup046850.1, Ppup048040.1, Ppup059950.1, Ppup060330.1, Ppup060380.1, Ppup061710.1, Ppup062660.1, Ppup063…
GO:0032101	BP	e	regulation of response to external stimulus	78/2424	255/10157	0.0138537	4	78	0.235702	Ppup004450.1, Ppup005260.1, Ppup005470.1, Ppup005940.1, Ppup006190.1, Ppup008760.1, Ppup011120.1, Ppup019220.1, Ppup020500.1, Ppup022030.1, Ppup026660.1, Ppup027200.1, Ppup027500.1, Ppup027520.1, Ppup027810.1, Ppup040010.1, Ppup044250.1, Ppup045480.1, Ppup046770.1, Ppup050410.1, Ppup052950.1, Ppup052960.1, Ppup053150.1, Ppup053970.1, Ppup054230.1, Ppup062660.1, Ppup075330.1, Ppup075380.1, Ppup075…
GO:0010562	BP	e	positive regulation of phosphorus metabolic process	74/2424	240/10157	0.0139421	6	74	0.236487	Ppup004550.1, Ppup005280.1, Ppup006490.1, Ppup013130.1, Ppup017930.1, Ppup022170.1, Ppup024570.1, Ppup026440.1, Ppup027410.1, Ppup027810.1, Ppup028810.1, Ppup030870.1, Ppup035940.1, Ppup036080.1, Ppup036980.1, Ppup037560.1, Ppup040660.1, Ppup044130.1, Ppup044250.1, Ppup048770.1, Ppup049390.1, Ppup057310.1, Ppup057830.1, Ppup062600.1, Ppup063210.1, Ppup075760.1, Ppup075960.1, Ppup077440.1, Ppup083…
GO:0045937	BP	e	positive regulation of phosphate metabolic process	74/2424	240/10157	0.0139421	7	74	0.236487	Ppup004550.1, Ppup005280.1, Ppup006490.1, Ppup013130.1, Ppup017930.1, Ppup022170.1, Ppup024570.1, Ppup026440.1, Ppup027410.1, Ppup027810.1, Ppup028810.1, Ppup030870.1, Ppup035940.1, Ppup036080.1, Ppup036980.1, Ppup037560.1, Ppup040660.1, Ppup044130.1, Ppup044250.1, Ppup048770.1, Ppup049390.1, Ppup057310.1, Ppup057830.1, Ppup062600.1, Ppup063210.1, Ppup075760.1, Ppup075960.1, Ppup077440.1, Ppup083…
GO:1904398	BP	e	positive regulation of neuromuscular junction development	10/2424	20/10157	0.0140969	7	10	0.23767	Ppup008680.1, Ppup039090.1, Ppup046770.1, Ppup048860.1, Ppup074880.1, Ppup090820.1, Ppup109360.1, Ppup120140.1, Ppup126170.1, Ppup168760.1
GO:0120161	BP	e	regulation of cold-induced thermogenesis	10/2424	20/10157	0.0140969	4	10	0.23767	Ppup026960.1, Ppup030870.1, Ppup045850.1, Ppup051070.1, Ppup061620.1, Ppup062320.1, Ppup087280.1, Ppup127660.1, Ppup144760.1, Ppup176270.1
GO:0055081	BP	e	anion homeostasis	10/2424	20/10157	0.0140969	6	10	0.23767	Ppup020100.1, Ppup025890.1, Ppup043200.1, Ppup104600.1, Ppup109420.1, Ppup109430.1, Ppup122620.1, Ppup130100.1, Ppup153110.1, Ppup171790.1
GO:0018107	BP	e	peptidyl-threonine phosphorylation	10/2424	20/10157	0.0140969	9	10	0.23767	Ppup027810.1, Ppup035940.1, Ppup037330.1, Ppup037560.1, Ppup046810.1, Ppup100660.1, Ppup114810.1, Ppup122550.1, Ppup126170.1, Ppup133890.1
GO:0010557	BP	e	positive regulation of macromolecule biosynthetic process	178/2424	636/10157	0.0141894	6	178	0.23887	Ppup001870.1, Ppup003620.1, Ppup004410.1, Ppup004550.1, Ppup005280.1, Ppup006210.1, Ppup006720.1, Ppup007300.1, Ppup007710.1, Ppup008030.1, Ppup008570.1, Ppup008760.1, Ppup011100.1, Ppup014100.1, Ppup015730.1, Ppup016860.1, Ppup017950.1, Ppup018270.1, Ppup018590.1, Ppup018630.1, Ppup018690.1, Ppup018960.1, Ppup019150.1, Ppup019460.1, Ppup019810.1, Ppup019930.1, Ppup019950.1, Ppup021150.1, Ppup021…
GO:0072331	BP	e	signal transduction by p53 class mediator	13/2424	29/10157	0.0142224	6	13	0.239065	Ppup018270.1, Ppup027520.1, Ppup030870.1, Ppup037010.1, Ppup037560.1, Ppup059860.1, Ppup093660.1, Ppup122870.1, Ppup127830.1, Ppup138980.1, Ppup141700.1, Ppup144760.1, Ppup160690.1
GO:0040013	BP	e	negative regulation of locomotion	19/2424	47/10157	0.0148342	4	19	0.248974	Ppup005490.1, Ppup014250.1, Ppup025700.1, Ppup026310.1, Ppup050970.1, Ppup057310.1, Ppup057830.1, Ppup075760.1, Ppup076820.1, Ppup085360.1, Ppup093860.1, Ppup111590.1, Ppup116890.1, Ppup127050.1, Ppup132570.1, Ppup138480.1, Ppup145860.1, Ppup146370.1, Ppup165990.1
GO:0034655	BP	e	nucleobase-containing compound catabolic process	52/2424	161/10157	0.0150386	5	52	0.251959	Ppup005210.1, Ppup014330.1, Ppup015760.1, Ppup023010.1, Ppup025790.1, Ppup026790.1, Ppup027520.1, Ppup028780.1, Ppup031100.1, Ppup037010.1, Ppup040010.1, Ppup040060.1, Ppup043010.1, Ppup043500.1, Ppup043550.1, Ppup045860.1, Ppup052580.1, Ppup062360.1, Ppup063920.1, Ppup064000.1, Ppup069530.1, Ppup081980.1, Ppup084440.1, Ppup084660.1, Ppup085930.1, Ppup094560.1, Ppup102180.1, Ppup106600.1, Ppup109…
GO:0071453	BP	e	cellular response to oxygen levels	15/2424	35/10157	0.0151248	4	15	0.251959	Ppup009230.1, Ppup009340.1, Ppup017950.1, Ppup027280.1, Ppup043150.1, Ppup046850.1, Ppup047070.1, Ppup094510.1, Ppup101240.1, Ppup122830.1, Ppup122880.1, Ppup124080.1, Ppup143800.1, Ppup152000.1, Ppup161610.1
GO:1901890	BP	e	positive regulation of cell junction assembly	15/2424	35/10157	0.0151248	6	15	0.251959	Ppup003910.1, Ppup008680.1, Ppup010280.1, Ppup027280.1, Ppup039090.1, Ppup046770.1, Ppup048860.1, Ppup074880.1, Ppup086470.1, Ppup090820.1, Ppup103270.1, Ppup109360.1, Ppup120140.1, Ppup126170.1, Ppup168760.1
GO:0035966	BP	e	response to topologically incorrect protein	15/2424	35/10157	0.0151248	4	15	0.251959	Ppup021070.1, Ppup046980.1, Ppup048420.1, Ppup063060.1, Ppup075210.1, Ppup075920.1, Ppup083350.1, Ppup104760.1, Ppup106300.1, Ppup123990.1, Ppup143800.1, Ppup144510.1, Ppup145840.1, Ppup172290.1, Ppup172490.1
GO:1903900	BP	e	regulation of viral life cycle	15/2424	35/10157	0.0151248	5	15	0.251959	Ppup007260.1, Ppup027520.1, Ppup031510.1, Ppup037010.1, Ppup040060.1, Ppup076900.1, Ppup094070.1, Ppup107050.1, Ppup120030.1, Ppup126030.1, Ppup134690.1, Ppup138480.1, Ppup145020.1, Ppup154750.1, Ppup173170.1
GO:0007349	BP	e	cellularization	17/2424	41/10157	0.0152358	3	17	0.253055	Ppup004180.1, Ppup006950.1, Ppup027050.1, Ppup027410.1, Ppup037910.1, Ppup040580.1, Ppup040660.1, Ppup050410.1, Ppup053540.1, Ppup063280.1, Ppup076330.1, Ppup084080.1, Ppup086990.1, Ppup101280.1, Ppup130400.1, Ppup135110.1, Ppup160440.1
GO:0007616	BP	e	long-term memory	17/2424	41/10157	0.0152358	7	17	0.253055	Ppup009470.1, Ppup027690.1, Ppup043580.1, Ppup058840.1, Ppup064850.1, Ppup075230.1, Ppup086620.1, Ppup095850.1, Ppup101280.1, Ppup123780.1, Ppup133890.1, Ppup139640.1, Ppup143530.1, Ppup145680.1, Ppup152740.1, Ppup165290.1, Ppup168340.1
GO:0090066	BP	e	regulation of anatomical structure size	67/2424	216/10157	0.0153191	3	67	0.25406	Ppup005490.1, Ppup006810.1, Ppup008030.1, Ppup008570.1, Ppup009190.1, Ppup011200.1, Ppup017930.1, Ppup018600.1, Ppup020100.1, Ppup021210.1, Ppup021300.1, Ppup022170.1, Ppup027280.1, Ppup031080.1, Ppup036980.1, Ppup042150.1, Ppup043440.1, Ppup044250.1, Ppup046770.1, Ppup046930.1, Ppup064320.1, Ppup064390.1, Ppup071180.1, Ppup071370.1, Ppup075230.1, Ppup075410.1, Ppup081850.1, Ppup084280.1, Ppup084…
GO:0046942	BP	e	carboxylic acid transport	45/2424	137/10157	0.0153781	7	45	0.254278	Ppup004080.1, Ppup004420.1, Ppup007130.1, Ppup024330.1, Ppup025130.1, Ppup028060.1, Ppup031080.1, Ppup031630.1, Ppup038150.1, Ppup051070.1, Ppup053500.1, Ppup057970.1, Ppup063970.1, Ppup074560.1, Ppup074640.1, Ppup077110.1, Ppup082200.1, Ppup085610.1, Ppup086080.1, Ppup097640.1, Ppup106580.1, Ppup107280.1, Ppup110260.1, Ppup112560.1, Ppup114070.1, Ppup127000.1, Ppup127010.1, Ppup127030.1, Ppup130…
GO:0015849	BP	e	organic acid transport	45/2424	137/10157	0.0153781	5	45	0.254278	Ppup004080.1, Ppup004420.1, Ppup007130.1, Ppup024330.1, Ppup025130.1, Ppup028060.1, Ppup031080.1, Ppup031630.1, Ppup038150.1, Ppup051070.1, Ppup053500.1, Ppup057970.1, Ppup063970.1, Ppup074560.1, Ppup074640.1, Ppup077110.1, Ppup082200.1, Ppup085610.1, Ppup086080.1, Ppup097640.1, Ppup106580.1, Ppup107280.1, Ppup110260.1, Ppup112560.1, Ppup114070.1, Ppup127000.1, Ppup127010.1, Ppup127030.1, Ppup130…
GO:0034220	BP	e	ion transmembrane transport	71/2424	231/10157	0.0154004	5	71	0.254278	Ppup002250.1, Ppup004420.1, Ppup006500.1, Ppup007780.1, Ppup017880.1, Ppup018310.1, Ppup020100.1, Ppup020860.1, Ppup021490.1, Ppup025890.1, Ppup028060.1, Ppup031080.1, Ppup031630.1, Ppup035920.1, Ppup040030.1, Ppup046230.1, Ppup051070.1, Ppup052420.1, Ppup053760.1, Ppup057970.1, Ppup059950.1, Ppup060330.1, Ppup063560.1, Ppup065840.1, Ppup071180.1, Ppup074560.1, Ppup074640.1, Ppup075450.1, Ppup076…
GO:0006397	BP	e	mRNA processing	98/2424	332/10157	0.0154414	8	98	0.254511	Ppup001810.1, Ppup003970.1, Ppup007300.1, Ppup009470.1, Ppup009660.1, Ppup009680.1, Ppup010940.1, Ppup014110.1, Ppup014330.1, Ppup016840.1, Ppup016860.1, Ppup016900.1, Ppup017570.1, Ppup023010.1, Ppup023850.1, Ppup024160.1, Ppup024270.1, Ppup026630.1, Ppup026830.1, Ppup027020.1, Ppup027070.1, Ppup027950.1, Ppup031100.1, Ppup032990.1, Ppup035260.1, Ppup037010.1, Ppup039310.1, Ppup039420.1, Ppup040…
GO:0035774	BP	e	positive regulation of insulin secretion involved in cellular response to glucose stimulus	6/2424	10/10157	0.0156195	11	6	0.254511	Ppup011470.1, Ppup017930.1, Ppup069310.1, Ppup086470.1, Ppup109260.1, Ppup165290.1
GO:0030500	BP	e	regulation of bone mineralization	6/2424	10/10157	0.0156195	6	6	0.254511	Ppup005470.1, Ppup019930.1, Ppup036080.1, Ppup084230.1, Ppup099860.1, Ppup105970.1
GO:0055091	BP	e	phospholipid homeostasis	6/2424	10/10157	0.0156195	7	6	0.254511	Ppup043200.1, Ppup104600.1, Ppup109420.1, Ppup109430.1, Ppup130100.1, Ppup153110.1
GO:1903201	BP	e	regulation of oxidative stress-induced cell death	6/2424	10/10157	0.0156195	7	6	0.254511	Ppup027280.1, Ppup027490.1, Ppup084440.1, Ppup122830.1, Ppup124080.1, Ppup173320.1
GO:0090136	BP	e	epithelial cell-cell adhesion	6/2424	10/10157	0.0156195	4	6	0.254511	Ppup026360.1, Ppup086980.1, Ppup101280.1, Ppup131550.1, Ppup140770.1, Ppup174910.1
GO:0032958	BP	e	inositol phosphate biosynthetic process	6/2424	10/10157	0.0156195	7	6	0.254511	Ppup062660.1, Ppup092480.1, Ppup111860.1, Ppup130150.1, Ppup142860.1, Ppup156220.1
GO:0099173	BP	e	postsynapse organization	6/2424	10/10157	0.0156195	4	6	0.254511	Ppup020690.1, Ppup044340.1, Ppup086420.1, Ppup098040.1, Ppup122880.1, Ppup124670.1
GO:0030032	BP	e	lamellipodium assembly	6/2424	10/10157	0.0156195	7	6	0.254511	Ppup007460.1, Ppup042910.1, Ppup086470.1, Ppup097870.1, Ppup110970.1, Ppup169680.1
GO:0043549	BP	e	regulation of kinase activity	56/2424	176/10157	0.015746	8	56	0.256199	Ppup003100.1, Ppup005320.1, Ppup006720.1, Ppup013130.1, Ppup019820.1, Ppup022170.1, Ppup027280.1, Ppup027810.1, Ppup028810.1, Ppup029910.1, Ppup030870.1, Ppup035940.1, Ppup036080.1, Ppup044130.1, Ppup044250.1, Ppup046070.1, Ppup053970.1, Ppup058670.1, Ppup062600.1, Ppup075760.1, Ppup075960.1, Ppup077440.1, Ppup079920.1, Ppup082620.1, Ppup087280.1, Ppup090980.1, Ppup094070.1, Ppup095470.1, Ppup096…
GO:0031398	BP	e	positive regulation of protein ubiquitination	19/2424	48/10157	0.0162283	10	19	0.263279	Ppup004410.1, Ppup013200.1, Ppup018680.1, Ppup024570.1, Ppup040150.1, Ppup053660.1, Ppup059860.1, Ppup075920.1, Ppup079510.1, Ppup082970.1, Ppup083220.1, Ppup090640.1, Ppup092370.1, Ppup104550.1, Ppup122830.1, Ppup126130.1, Ppup131770.1, Ppup139970.1, Ppup141010.1
GO:0002274	BP	e	myeloid leukocyte activation	19/2424	48/10157	0.0162283	4	19	0.263279	Ppup001870.1, Ppup043610.1, Ppup053510.1, Ppup061660.1, Ppup082260.1, Ppup086420.1, Ppup091630.1, Ppup102180.1, Ppup105750.1, Ppup116770.1, Ppup122120.1, Ppup124670.1, Ppup130170.1, Ppup152050.1, Ppup166870.1, Ppup171660.1, Ppup172290.1, Ppup173320.1, Ppup173440.1
GO:0032103	BP	e	positive regulation of response to external stimulus	43/2424	129/10157	0.0162832	5	43	0.263789	Ppup006190.1, Ppup008760.1, Ppup020500.1, Ppup026660.1, Ppup027200.1, Ppup027500.1, Ppup027810.1, Ppup046770.1, Ppup053150.1, Ppup053970.1, Ppup075330.1, Ppup075380.1, Ppup075580.1, Ppup077400.1, Ppup082030.1, Ppup086420.1, Ppup086470.1, Ppup086710.1, Ppup090900.1, Ppup093050.1, Ppup095370.1, Ppup103750.1, Ppup106080.1, Ppup106190.1, Ppup109060.1, Ppup112100.1, Ppup114980.1, Ppup114990.1, Ppup116…
GO:0008277	BP	e	regulation of G protein-coupled receptor signaling pathway	11/2424	24/10157	0.0164584	6	11	0.26624	Ppup001800.1, Ppup004450.1, Ppup005260.1, Ppup006490.1, Ppup021430.1, Ppup062660.1, Ppup079870.1, Ppup081850.1, Ppup086710.1, Ppup113360.1, Ppup160910.1
GO:0009267	BP	e	cellular response to starvation	26/2424	71/10157	0.0166803	6	26	0.26944	Ppup009730.1, Ppup012590.1, Ppup016190.1, Ppup021150.1, Ppup021300.1, Ppup027200.1, Ppup028400.1, Ppup035420.1, Ppup058440.1, Ppup084770.1, Ppup092000.1, Ppup112480.1, Ppup116700.1, Ppup119520.1, Ppup122880.1, Ppup126550.1, Ppup133890.1, Ppup134150.1, Ppup138770.1, Ppup139120.1, Ppup140310.1, Ppup145020.1, Ppup149590.1, Ppup161610.1, Ppup171790.1, Ppup174280.1
GO:1990778	BP	e	protein localization to cell periphery	40/2424	119/10157	0.0167831	5	40	0.27063	Ppup003230.1, Ppup009830.1, Ppup011220.1, Ppup022170.1, Ppup024560.1, Ppup026440.1, Ppup027410.1, Ppup040260.1, Ppup050700.1, Ppup053540.1, Ppup058800.1, Ppup063370.1, Ppup075410.1, Ppup077190.1, Ppup081800.1, Ppup093240.1, Ppup093840.1, Ppup094070.1, Ppup099690.1, Ppup106330.1, Ppup108120.1, Ppup110550.1, Ppup112100.1, Ppup113790.1, Ppup122320.1, Ppup123780.1, Ppup124500.1, Ppup126930.1, Ppup133…
GO:0034401	BP	e	chromatin organization involved in regulation of transcription	21/2424	55/10157	0.0168024	5	21	0.27063	Ppup013200.1, Ppup018600.1, Ppup018870.1, Ppup022280.1, Ppup025760.1, Ppup039420.1, Ppup040370.1, Ppup040380.1, Ppup050210.1, Ppup053830.1, Ppup076270.1, Ppup076280.1, Ppup092260.1, Ppup104340.1, Ppup123820.1, Ppup127650.1, Ppup140070.1, Ppup140190.1, Ppup142580.1, Ppup171700.1, Ppup175160.1
GO:0009314	BP	e	response to radiation	57/2424	180/10157	0.0169021	3	57	0.271844	Ppup001720.1, Ppup002240.1, Ppup002900.1, Ppup004150.1, Ppup004450.1, Ppup005470.1, Ppup011260.1, Ppup019150.1, Ppup019460.1, Ppup021090.1, Ppup025100.1, Ppup030870.1, Ppup035800.1, Ppup037540.1, Ppup039790.1, Ppup040660.1, Ppup046280.1, Ppup052220.1, Ppup052820.1, Ppup062660.1, Ppup064880.1, Ppup079870.1, Ppup082130.1, Ppup082200.1, Ppup084080.1, Ppup085610.1, Ppup086080.1, Ppup093660.1, Ppup096…
GO:0010628	BP	e	positive regulation of gene expression	194/2424	703/10157	0.0171174	6	194	0.274912	Ppup001870.1, Ppup003230.1, Ppup003620.1, Ppup004410.1, Ppup004550.1, Ppup005280.1, Ppup005470.1, Ppup006210.1, Ppup006720.1, Ppup007300.1, Ppup007710.1, Ppup008030.1, Ppup008570.1, Ppup008760.1, Ppup009830.1, Ppup011100.1, Ppup014100.1, Ppup015890.1, Ppup016860.1, Ppup017950.1, Ppup018270.1, Ppup018590.1, Ppup018630.1, Ppup018690.1, Ppup018960.1, Ppup019150.1, Ppup019460.1, Ppup019810.1, Ppup019…
GO:0048468	BP	e	cell development	117/2424	405/10157	0.0172844	3	117	0.277195	Ppup001870.1, Ppup005470.1, Ppup006660.1, Ppup006950.1, Ppup008030.1, Ppup008570.1, Ppup011560.1, Ppup015880.1, Ppup015890.1, Ppup017950.1, Ppup018070.1, Ppup018590.1, Ppup019930.1, Ppup020690.1, Ppup021300.1, Ppup022170.1, Ppup024270.1, Ppup025950.1, Ppup026660.1, Ppup026670.1, Ppup027050.1, Ppup027070.1, Ppup027200.1, Ppup027500.1, Ppup031020.1, Ppup031700.1, Ppup037640.1, Ppup037770.1, Ppup039…
GO:0016482	BP	e	cytosolic transport	24/2424	64/10157	0.0174367	5	24	0.2792	Ppup003070.1, Ppup006950.1, Ppup019820.1, Ppup020500.1, Ppup027870.1, Ppup029350.1, Ppup035330.1, Ppup046560.1, Ppup050700.1, Ppup052220.1, Ppup058670.1, Ppup071370.1, Ppup091320.1, Ppup097330.1, Ppup104480.1, Ppup113560.1, Ppup120550.1, Ppup125670.1, Ppup130400.1, Ppup139640.1, Ppup140190.1, Ppup160910.1, Ppup171700.1, Ppup174280.1
GO:0051960	BP	e	regulation of nervous system development	107/2424	366/10157	0.0174593	5	107	0.2792	Ppup001800.1, Ppup004410.1, Ppup005490.1, Ppup006950.1, Ppup007690.1, Ppup008680.1, Ppup010280.1, Ppup017950.1, Ppup018680.1, Ppup018760.1, Ppup020690.1, Ppup022170.1, Ppup024220.1, Ppup025100.1, Ppup025690.1, Ppup025760.1, Ppup026370.1, Ppup026960.1, Ppup027050.1, Ppup027280.1, Ppup027410.1, Ppup027690.1, Ppup028360.1, Ppup030870.1, Ppup037880.1, Ppup039090.1, Ppup039960.1, Ppup040010.1, Ppup040…
GO:2001242	BP	e	regulation of intrinsic apoptotic signaling pathway	13/2424	30/10157	0.0175028	8	13	0.279495	Ppup008700.1, Ppup009230.1, Ppup021150.1, Ppup027490.1, Ppup048420.1, Ppup076390.1, Ppup077520.1, Ppup086580.1, Ppup095230.1, Ppup122830.1, Ppup146400.1, Ppup160690.1, Ppup162360.1
GO:1901361	BP	e	organic cyclic compound catabolic process	65/2424	210/10157	0.0175332	4	65	0.27955	Ppup005210.1, Ppup014330.1, Ppup015760.1, Ppup019030.1, Ppup023010.1, Ppup025790.1, Ppup026790.1, Ppup027520.1, Ppup028780.1, Ppup031100.1, Ppup037010.1, Ppup040010.1, Ppup040060.1, Ppup043010.1, Ppup043390.1, Ppup043500.1, Ppup043550.1, Ppup045860.1, Ppup047250.1, Ppup052580.1, Ppup060140.1, Ppup062360.1, Ppup063920.1, Ppup064000.1, Ppup069530.1, Ppup081980.1, Ppup083190.1, Ppup084440.1, Ppup084…
GO:0031669	BP	e	cellular response to nutrient levels	29/2424	81/10157	0.0176063	5	29	0.27955	Ppup009730.1, Ppup012590.1, Ppup016190.1, Ppup021150.1, Ppup021300.1, Ppup027200.1, Ppup027280.1, Ppup028400.1, Ppup035420.1, Ppup058440.1, Ppup084770.1, Ppup092000.1, Ppup094510.1, Ppup112480.1, Ppup116700.1, Ppup119520.1, Ppup122880.1, Ppup126550.1, Ppup133890.1, Ppup134150.1, Ppup138770.1, Ppup139120.1, Ppup140310.1, Ppup145020.1, Ppup149590.1, Ppup152000.1, Ppup161610.1, Ppup171790.1, Ppup174…
GO:0044262	BP	e	cellular carbohydrate metabolic process	29/2424	81/10157	0.0176063	4	29	0.27955	Ppup006440.1, Ppup010190.1, Ppup020690.1, Ppup041360.1, Ppup050800.1, Ppup052630.1, Ppup053510.1, Ppup076120.1, Ppup086230.1, Ppup094070.1, Ppup095640.1, Ppup103160.1, Ppup105580.1, Ppup111860.1, Ppup112240.1, Ppup112930.1, Ppup113500.1, Ppup123890.1, Ppup125760.1, Ppup125780.1, Ppup125860.1, Ppup134680.1, Ppup136110.1, Ppup156220.1, Ppup156490.1, Ppup157240.1, Ppup163360.1, Ppup163850.1, Ppup172…
GO:0002064	BP	e	epithelial cell development	29/2424	81/10157	0.0176063	4	29	0.27955	Ppup018590.1, Ppup031700.1, Ppup039090.1, Ppup042450.1, Ppup045950.1, Ppup050410.1, Ppup058840.1, Ppup065950.1, Ppup086980.1, Ppup095850.1, Ppup109360.1, Ppup114260.1, Ppup123000.1, Ppup124100.1, Ppup132090.1, Ppup135110.1, Ppup135280.1, Ppup137460.1, Ppup142950.1, Ppup145680.1, Ppup145860.1, Ppup146090.1, Ppup146310.1, Ppup160910.1, Ppup165510.1, Ppup165990.1, Ppup173180.1, Ppup173790.1, Ppup173…
GO:0001933	BP	e	negative regulation of protein phosphorylation	31/2424	89/10157	0.0176349	9	31	0.279607	Ppup006720.1, Ppup010070.1, Ppup014250.1, Ppup053970.1, Ppup054230.1, Ppup057830.1, Ppup058220.1, Ppup058670.1, Ppup075230.1, Ppup075720.1, Ppup083600.1, Ppup087280.1, Ppup094070.1, Ppup096980.1, Ppup104470.1, Ppup109280.1, Ppup111590.1, Ppup115210.1, Ppup115500.1, Ppup116770.1, Ppup126550.1, Ppup126790.1, Ppup135110.1, Ppup138480.1, Ppup140310.1, Ppup145020.1, Ppup145680.1, Ppup146370.1, Ppup156…
GO:0018210	BP	e	peptidyl-threonine modification	10/2424	21/10157	0.018069	8	10	0.283263	Ppup027810.1, Ppup035940.1, Ppup037330.1, Ppup037560.1, Ppup046810.1, Ppup100660.1, Ppup114810.1, Ppup122550.1, Ppup126170.1, Ppup133890.1
GO:1901880	BP	e	negative regulation of protein depolymerization	10/2424	21/10157	0.018069	7	10	0.283263	Ppup009190.1, Ppup043440.1, Ppup064390.1, Ppup087280.1, Ppup106040.1, Ppup114260.1, Ppup126790.1, Ppup142060.1, Ppup150900.1, Ppup165030.1
GO:0060998	BP	e	regulation of dendritic spine development	10/2424	21/10157	0.018069	10	10	0.283263	Ppup004410.1, Ppup010280.1, Ppup050970.1, Ppup052710.1, Ppup075890.1, Ppup077340.1, Ppup086420.1, Ppup098040.1, Ppup124670.1, Ppup145860.1
GO:0050848	BP	e	regulation of calcium-mediated signaling	10/2424	21/10157	0.018069	7	10	0.283263	Ppup004550.1, Ppup038890.1, Ppup038960.1, Ppup059950.1, Ppup061710.1, Ppup097670.1, Ppup109830.1, Ppup109840.1, Ppup137540.1, Ppup149470.1
GO:0045746	BP	e	negative regulation of Notch signaling pathway	10/2424	21/10157	0.018069	7	10	0.283263	Ppup006490.1, Ppup040010.1, Ppup046070.1, Ppup050680.1, Ppup064850.1, Ppup103270.1, Ppup104560.1, Ppup104710.1, Ppup111640.1, Ppup130440.1
GO:0032368	BP	e	regulation of lipid transport	12/2424	26/10157	0.0181189	5	12	0.283263	Ppup005940.1, Ppup017930.1, Ppup037880.1, Ppup043200.1, Ppup054230.1, Ppup062600.1, Ppup082260.1, Ppup104600.1, Ppup109420.1, Ppup109430.1, Ppup130100.1, Ppup137390.1
GO:0043954	BP	e	cellular component maintenance	12/2424	26/10157	0.0181189	4	12	0.283263	Ppup009190.1, Ppup018600.1, Ppup020690.1, Ppup041140.1, Ppup108120.1, Ppup114260.1, Ppup122880.1, Ppup131550.1, Ppup135110.1, Ppup145860.1, Ppup173180.1, Ppup173910.1
GO:0006986	BP	e	response to unfolded protein	12/2424	26/10157	0.0181189	5	12	0.283263	Ppup021070.1, Ppup046980.1, Ppup063060.1, Ppup075920.1, Ppup083350.1, Ppup104760.1, Ppup106300.1, Ppup143800.1, Ppup144510.1, Ppup145840.1, Ppup172290.1, Ppup172490.1
GO:0045069	BP	e	regulation of viral genome replication	12/2424	26/10157	0.0181189	6	12	0.283263	Ppup007260.1, Ppup027520.1, Ppup037010.1, Ppup040060.1, Ppup076900.1, Ppup094070.1, Ppup107050.1, Ppup126030.1, Ppup138480.1, Ppup145020.1, Ppup154750.1, Ppup173170.1
GO:0002793	BP	e	positive regulation of peptide secretion	19/2424	49/10157	0.018359	7	19	0.286617	Ppup002780.1, Ppup010280.1, Ppup011470.1, Ppup017930.1, Ppup027680.1, Ppup043200.1, Ppup057910.1, Ppup069310.1, Ppup075960.1, Ppup086470.1, Ppup104600.1, Ppup108180.1, Ppup109260.1, Ppup109420.1, Ppup109430.1, Ppup137390.1, Ppup138910.1, Ppup144260.1, Ppup165290.1
GO:1902533	BP	e	positive regulation of intracellular signal transduction	70/2424	229/10157	0.0185515	7	70	0.288963	Ppup004410.1, Ppup004550.1, Ppup005280.1, Ppup006490.1, Ppup006500.1, Ppup010210.1, Ppup013130.1, Ppup017930.1, Ppup019150.1, Ppup019460.1, Ppup022170.1, Ppup024570.1, Ppup026790.1, Ppup027200.1, Ppup027410.1, Ppup028810.1, Ppup035420.1, Ppup035600.1, Ppup035940.1, Ppup037010.1, Ppup037540.1, Ppup037560.1, Ppup038890.1, Ppup044250.1, Ppup046070.1, Ppup046770.1, Ppup048420.1, Ppup049390.1, Ppup050…
GO:0044089	BP	e	positive regulation of cellular component biogenesis	58/2424	185/10157	0.0186257	5	58	0.288963	Ppup003910.1, Ppup005280.1, Ppup005970.1, Ppup008680.1, Ppup010280.1, Ppup018070.1, Ppup018600.1, Ppup021570.1, Ppup022170.1, Ppup024690.1, Ppup027280.1, Ppup027500.1, Ppup031100.1, Ppup031510.1, Ppup039090.1, Ppup042150.1, Ppup044250.1, Ppup046770.1, Ppup046970.1, Ppup048860.1, Ppup050970.1, Ppup052230.1, Ppup057310.1, Ppup058840.1, Ppup063440.1, Ppup063940.1, Ppup071370.1, Ppup074880.1, Ppup075…
GO:0046700	BP	e	heterocycle catabolic process	58/2424	185/10157	0.0186257	4	58	0.288963	Ppup005210.1, Ppup014330.1, Ppup015760.1, Ppup019030.1, Ppup023010.1, Ppup025790.1, Ppup026790.1, Ppup027520.1, Ppup028780.1, Ppup031100.1, Ppup037010.1, Ppup040010.1, Ppup040060.1, Ppup043010.1, Ppup043390.1, Ppup043500.1, Ppup043550.1, Ppup045860.1, Ppup052580.1, Ppup062360.1, Ppup063920.1, Ppup064000.1, Ppup069530.1, Ppup081980.1, Ppup084440.1, Ppup084660.1, Ppup085930.1, Ppup094560.1, Ppup102…
GO:2000241	BP	e	regulation of reproductive process	24/2424	65/10157	0.0186395	3	24	0.288963	Ppup004180.1, Ppup015890.1, Ppup018680.1, Ppup021180.1, Ppup021300.1, Ppup021950.1, Ppup030870.1, Ppup040010.1, Ppup047890.1, Ppup086980.1, Ppup095370.1, Ppup104330.1, Ppup109360.1, Ppup112480.1, Ppup113230.1, Ppup123910.1, Ppup132070.1, Ppup133890.1, Ppup135280.1, Ppup140190.1, Ppup142950.1, Ppup145680.1, Ppup157110.1, Ppup160690.1
GO:1902373	BP	e	negative regulation of mRNA catabolic process	7/2424	13/10157	0.0188196	9	7	0.288963	Ppup015890.1, Ppup020310.1, Ppup040060.1, Ppup076900.1, Ppup140390.1, Ppup154550.1, Ppup168420.1
GO:0046324	BP	e	regulation of glucose import	7/2424	13/10157	0.0188196	7	7	0.288963	Ppup036980.1, Ppup062600.1, Ppup075760.1, Ppup086080.1, Ppup103510.1, Ppup106330.1, Ppup157280.1
GO:0046329	BP	e	negative regulation of JNK cascade	7/2424	13/10157	0.0188196	12	7	0.288963	Ppup054230.1, Ppup075720.1, Ppup096980.1, Ppup126790.1, Ppup145680.1, Ppup146370.1, Ppup162360.1
GO:0070050	BP	e	neuron cellular homeostasis	7/2424	13/10157	0.0188196	5	7	0.288963	Ppup010330.1, Ppup028280.1, Ppup075920.1, Ppup112930.1, Ppup130150.1, Ppup133780.1, Ppup139870.1
GO:1904262	BP	e	negative regulation of TORC1 signaling	7/2424	13/10157	0.0188196	9	7	0.288963	Ppup016190.1, Ppup021300.1, Ppup030870.1, Ppup092000.1, Ppup134150.1, Ppup138770.1, Ppup149590.1
GO:0009084	BP	e	glutamine family amino acid biosynthetic process	7/2424	13/10157	0.0188196	9	7	0.288963	Ppup010470.1, Ppup085610.1, Ppup125730.1, Ppup125740.1, Ppup145850.1, Ppup156530.1, Ppup176440.1
GO:0040034	BP	e	regulation of development, heterochronic	7/2424	13/10157	0.0188196	4	7	0.288963	Ppup011560.1, Ppup025760.1, Ppup031700.1, Ppup065930.1, Ppup105530.1, Ppup133970.1, Ppup146090.1
GO:0070727	BP	e	cellular macromolecule localization	134/2424	471/10157	0.0199517	3	134	0.30509	Ppup003170.1, Ppup003230.1, Ppup004540.1, Ppup006950.1, Ppup007710.1, Ppup009830.1, Ppup010280.1, Ppup011220.1, Ppup013930.1, Ppup015740.1, Ppup016190.1, Ppup018070.1, Ppup018600.1, Ppup021180.1, Ppup021780.1, Ppup022170.1, Ppup024560.1, Ppup025920.1, Ppup026440.1, Ppup026960.1, Ppup027410.1, Ppup027500.1, Ppup033420.1, Ppup035750.1, Ppup037330.1, Ppup040260.1, Ppup046560.1, Ppup048800.1, Ppup048…
GO:0019941	BP	e	modification-dependent protein catabolic process	111/2424	383/10157	0.020065	7	111	0.305984	Ppup001710.1, Ppup002450.1, Ppup002900.1, Ppup003610.1, Ppup004410.1, Ppup004570.1, Ppup005470.1, Ppup006490.1, Ppup008760.1, Ppup012830.1, Ppup018680.1, Ppup018870.1, Ppup019010.1, Ppup019430.1, Ppup019820.1, Ppup020080.1, Ppup021070.1, Ppup023070.1, Ppup026220.1, Ppup026960.1, Ppup028140.1, Ppup031510.1, Ppup031610.1, Ppup033270.1, Ppup038210.1, Ppup039050.1, Ppup039790.1, Ppup040670.1, Ppup043…
GO:0034762	BP	e	regulation of transmembrane transport	45/2424	138/10157	0.0202573	5	45	0.308496	Ppup002250.1, Ppup003230.1, Ppup004150.1, Ppup005470.1, Ppup009830.1, Ppup010280.1, Ppup011220.1, Ppup017930.1, Ppup020860.1, Ppup026440.1, Ppup027810.1, Ppup036980.1, Ppup038960.1, Ppup062600.1, Ppup063560.1, Ppup064610.1, Ppup069270.1, Ppup071180.1, Ppup075540.1, Ppup075760.1, Ppup086080.1, Ppup090810.1, Ppup092830.1, Ppup094070.1, Ppup095530.1, Ppup098040.1, Ppup103270.1, Ppup103510.1, Ppup104…
GO:1903825	BP	e	organic acid transmembrane transport	24/2424	66/10157	0.0204339	6	24	0.31034	Ppup004420.1, Ppup028060.1, Ppup031080.1, Ppup031630.1, Ppup051070.1, Ppup057970.1, Ppup074560.1, Ppup074640.1, Ppup077110.1, Ppup085610.1, Ppup086080.1, Ppup097640.1, Ppup106580.1, Ppup127000.1, Ppup127030.1, Ppup130380.1, Ppup133180.1, Ppup138970.1, Ppup141890.1, Ppup143690.1, Ppup153300.1, Ppup154630.1, Ppup168300.1, Ppup171790.1
GO:1905039	BP	e	carboxylic acid transmembrane transport	24/2424	66/10157	0.0204339	8	24	0.31034	Ppup004420.1, Ppup028060.1, Ppup031080.1, Ppup031630.1, Ppup051070.1, Ppup057970.1, Ppup074560.1, Ppup074640.1, Ppup077110.1, Ppup085610.1, Ppup086080.1, Ppup097640.1, Ppup106580.1, Ppup127000.1, Ppup127030.1, Ppup130380.1, Ppup133180.1, Ppup138970.1, Ppup141890.1, Ppup143690.1, Ppup153300.1, Ppup154630.1, Ppup168300.1, Ppup171790.1
GO:0006165	BP	e	nucleoside diphosphate phosphorylation	12/2424	27/10157	0.0208915	8	12	0.314962	Ppup009900.1, Ppup026550.1, Ppup039110.1, Ppup040860.1, Ppup074930.1, Ppup075960.1, Ppup117160.1, Ppup119950.1, Ppup123890.1, Ppup152140.1, Ppup162500.1, Ppup167240.1
GO:0035304	BP	e	regulation of protein dephosphorylation	12/2424	27/10157	0.0208915	8	12	0.314962	Ppup004550.1, Ppup027280.1, Ppup041140.1, Ppup053660.1, Ppup063210.1, Ppup099430.1, Ppup099800.1, Ppup101030.1, Ppup112100.1, Ppup121540.1, Ppup140310.1, Ppup149470.1
GO:0007274	BP	e	neuromuscular synaptic transmission	12/2424	27/10157	0.0208915	8	12	0.314962	Ppup004180.1, Ppup008830.1, Ppup009190.1, Ppup019200.1, Ppup022170.1, Ppup022290.1, Ppup054430.1, Ppup091240.1, Ppup109160.1, Ppup114260.1, Ppup150900.1, Ppup168320.1
GO:0006732	BP	e	coenzyme metabolic process	49/2424	152/10157	0.0209073	4	49	0.314962	Ppup002290.1, Ppup003740.1, Ppup004480.1, Ppup009850.1, Ppup011470.1, Ppup016890.1, Ppup035830.1, Ppup043390.1, Ppup043610.1, Ppup045430.1, Ppup045460.1, Ppup045850.1, Ppup052580.1, Ppup058980.1, Ppup061710.1, Ppup063190.1, Ppup083320.1, Ppup083660.1, Ppup084830.1, Ppup090400.1, Ppup092170.1, Ppup095050.1, Ppup095440.1, Ppup095540.1, Ppup096950.1, Ppup104960.1, Ppup106250.1, Ppup106260.1, Ppup109…
GO:0031400	BP	e	negative regulation of protein modification process	49/2424	152/10157	0.0209073	8	49	0.314962	Ppup006720.1, Ppup010070.1, Ppup014250.1, Ppup035890.1, Ppup041140.1, Ppup049720.1, Ppup053660.1, Ppup053970.1, Ppup054230.1, Ppup057830.1, Ppup058220.1, Ppup058370.1, Ppup058670.1, Ppup075230.1, Ppup075380.1, Ppup075720.1, Ppup075920.1, Ppup080180.1, Ppup083600.1, Ppup087280.1, Ppup091670.1, Ppup094070.1, Ppup096980.1, Ppup101030.1, Ppup104470.1, Ppup109280.1, Ppup111590.1, Ppup112100.1, Ppup115…
GO:0001667	BP	e	ameboidal-type cell migration	36/2424	106/10157	0.0212475	5	36	0.319657	Ppup003170.1, Ppup003910.1, Ppup005460.1, Ppup005490.1, Ppup011200.1, Ppup021210.1, Ppup027500.1, Ppup036280.1, Ppup047250.1, Ppup048860.1, Ppup053410.1, Ppup058840.1, Ppup060140.1, Ppup062600.1, Ppup075720.1, Ppup085930.1, Ppup086980.1, Ppup096760.1, Ppup097400.1, Ppup098060.1, Ppup104330.1, Ppup110820.1, Ppup114050.1, Ppup115290.1, Ppup117200.1, Ppup120340.1, Ppup135110.1, Ppup141550.1, Ppup147…
GO:0043632	BP	e	modification-dependent macromolecule catabolic process	113/2424	391/10157	0.0213244	6	113	0.319677	Ppup001710.1, Ppup002450.1, Ppup002900.1, Ppup003610.1, Ppup004410.1, Ppup004570.1, Ppup005470.1, Ppup006490.1, Ppup008760.1, Ppup012830.1, Ppup018680.1, Ppup018870.1, Ppup019010.1, Ppup019430.1, Ppup019820.1, Ppup020080.1, Ppup021070.1, Ppup023070.1, Ppup026220.1, Ppup026960.1, Ppup028140.1, Ppup031510.1, Ppup031610.1, Ppup033270.1, Ppup038210.1, Ppup039050.1, Ppup039790.1, Ppup040670.1, Ppup043…
GO:0045596	BP	e	negative regulation of cell differentiation	56/2424	179/10157	0.021381	5	56	0.319677	Ppup001800.1, Ppup004410.1, Ppup005320.1, Ppup005490.1, Ppup005940.1, Ppup007690.1, Ppup020310.1, Ppup025690.1, Ppup026310.1, Ppup026790.1, Ppup026960.1, Ppup027280.1, Ppup027410.1, Ppup028100.1, Ppup028360.1, Ppup035800.1, Ppup035960.1, Ppup043150.1, Ppup043200.1, Ppup052950.1, Ppup052960.1, Ppup054230.1, Ppup057750.1, Ppup062660.1, Ppup064850.1, Ppup071370.1, Ppup075890.1, Ppup079170.1, Ppup085…
GO:0050708	BP	e	regulation of protein secretion	30/2424	86/10157	0.0215182	7	30	0.319677	Ppup002780.1, Ppup010280.1, Ppup011470.1, Ppup014360.1, Ppup017930.1, Ppup024510.1, Ppup025880.1, Ppup026960.1, Ppup027680.1, Ppup043200.1, Ppup057910.1, Ppup062600.1, Ppup069310.1, Ppup074160.1, Ppup075960.1, Ppup082790.1, Ppup086470.1, Ppup104600.1, Ppup109260.1, Ppup109420.1, Ppup109430.1, Ppup111590.1, Ppup133890.1, Ppup137390.1, Ppup138910.1, Ppup139120.1, Ppup144260.1, Ppup149470.1, Ppup153…
GO:0032367	BP	e	intracellular cholesterol transport	9/2424	18/10157	0.0215493	8	9	0.319677	Ppup043200.1, Ppup057820.1, Ppup075190.1, Ppup075410.1, Ppup104600.1, Ppup109420.1, Ppup109430.1, Ppup123320.1, Ppup137980.1
GO:1903725	BP	e	regulation of phospholipid metabolic process	9/2424	18/10157	0.0215493	7	9	0.319677	Ppup019820.1, Ppup020690.1, Ppup028400.1, Ppup040660.1, Ppup047250.1, Ppup060140.1, Ppup077440.1, Ppup126550.1, Ppup162270.1
GO:0016239	BP	e	positive regulation of macroautophagy	9/2424	18/10157	0.0215493	8	9	0.319677	Ppup025910.1, Ppup027280.1, Ppup057460.1, Ppup076900.1, Ppup101240.1, Ppup116340.1, Ppup134150.1, Ppup171790.1, Ppup174280.1
GO:0090207	BP	e	regulation of triglyceride metabolic process	9/2424	18/10157	0.0215493	6	9	0.319677	Ppup021300.1, Ppup040660.1, Ppup047250.1, Ppup060140.1, Ppup075750.1, Ppup126550.1, Ppup140980.1, Ppup153110.1, Ppup162270.1
GO:0060810	BP	e	intracellular mRNA localization involved in pattern specification process	9/2424	18/10157	0.0215493	5	9	0.319677	Ppup018070.1, Ppup027410.1, Ppup052220.1, Ppup085930.1, Ppup123910.1, Ppup140100.1, Ppup140190.1, Ppup168280.1, Ppup169510.1
GO:0034332	BP	e	adherens junction organization	9/2424	18/10157	0.0215493	6	9	0.319677	Ppup041140.1, Ppup101280.1, Ppup123780.1, Ppup131550.1, Ppup135110.1, Ppup137460.1, Ppup145860.1, Ppup152740.1, Ppup174910.1
GO:0001505	BP	e	regulation of neurotransmitter levels	49/2424	154/10157	0.0222329	3	49	0.319677	Ppup004180.1, Ppup004420.1, Ppup005830.1, Ppup006950.1, Ppup007130.1, Ppup008830.1, Ppup010920.1, Ppup019200.1, Ppup027200.1, Ppup028780.1, Ppup029370.1, Ppup037640.1, Ppup038420.1, Ppup048860.1, Ppup052260.1, Ppup052820.1, Ppup054430.1, Ppup055840.1, Ppup084230.1, Ppup085610.1, Ppup085760.1, Ppup086080.1, Ppup086470.1, Ppup096580.1, Ppup099520.1, Ppup106480.1, Ppup106580.1, Ppup106640.1, Ppup107…
GO:0061136	BP	e	regulation of proteasomal protein catabolic process	25/2424	69/10157	0.022344	9	25	0.319677	Ppup001710.1, Ppup005320.1, Ppup008760.1, Ppup011260.1, Ppup020080.1, Ppup025910.1, Ppup037330.1, Ppup038210.1, Ppup046570.1, Ppup049010.1, Ppup050100.1, Ppup052760.1, Ppup075920.1, Ppup076390.1, Ppup094610.1, Ppup114460.1, Ppup117270.1, Ppup122830.1, Ppup127830.1, Ppup130220.1, Ppup140310.1, Ppup146570.1, Ppup160690.1, Ppup172490.1, Ppup176270.1
GO:0110154	BP	e	RNA decapping	5/2424	8/10157	0.0223643	7	5	0.319677	Ppup027520.1, Ppup031100.1, Ppup103260.1, Ppup109030.1, Ppup174190.1
GO:0010603	BP	e	regulation of cytoplasmic mRNA processing body assembly	5/2424	8/10157	0.0223643	7	5	0.319677	Ppup017480.1, Ppup031100.1, Ppup084660.1, Ppup109030.1, Ppup141700.1
GO:1900408	BP	e	negative regulation of cellular response to oxidative stress	5/2424	8/10157	0.0223643	7	5	0.319677	Ppup027280.1, Ppup027490.1, Ppup084440.1, Ppup124080.1, Ppup173320.1
GO:1902883	BP	e	negative regulation of response to oxidative stress	5/2424	8/10157	0.0223643	6	5	0.319677	Ppup027280.1, Ppup027490.1, Ppup084440.1, Ppup124080.1, Ppup173320.1
GO:0032012	BP	e	regulation of ARF protein signal transduction	5/2424	8/10157	0.0223643	9	5	0.319677	Ppup019990.1, Ppup031560.1, Ppup049450.1, Ppup084510.1, Ppup093070.1
GO:0010874	BP	e	regulation of cholesterol efflux	5/2424	8/10157	0.0223643	8	5	0.319677	Ppup043200.1, Ppup054230.1, Ppup104600.1, Ppup109420.1, Ppup109430.1
GO:0045676	BP	e	regulation of R7 cell differentiation	5/2424	8/10157	0.0223643	10	5	0.319677	Ppup017950.1, Ppup101280.1, Ppup137670.1, Ppup142580.1, Ppup174910.1
GO:1903202	BP	e	negative regulation of oxidative stress-induced cell death	5/2424	8/10157	0.0223643	8	5	0.319677	Ppup027280.1, Ppup027490.1, Ppup084440.1, Ppup124080.1, Ppup173320.1
GO:0032878	BP	e	regulation of establishment or maintenance of cell polarity	5/2424	8/10157	0.0223643	4	5	0.319677	Ppup005490.1, Ppup044250.1, Ppup077190.1, Ppup084510.1, Ppup133060.1
GO:0016325	BP	e	oocyte microtubule cytoskeleton organization	5/2424	8/10157	0.0223643	8	5	0.319677	Ppup085930.1, Ppup086980.1, Ppup140100.1, Ppup157110.1, Ppup168280.1
GO:0016024	BP	e	CDP-diacylglycerol biosynthetic process	5/2424	8/10157	0.0223643	10	5	0.319677	Ppup040660.1, Ppup092170.1, Ppup135100.1, Ppup153110.1, Ppup167390.1
GO:0090303	BP	e	positive regulation of wound healing	5/2424	8/10157	0.0223643	7	5	0.319677	Ppup005490.1, Ppup022170.1, Ppup025490.1, Ppup084510.1, Ppup111240.1
GO:0110156	BP	e	methylguanosine-cap decapping	5/2424	8/10157	0.0223643	8	5	0.319677	Ppup027520.1, Ppup031100.1, Ppup103260.1, Ppup109030.1, Ppup174190.1
GO:2000637	BP	e	positive regulation of gene silencing by miRNA	5/2424	8/10157	0.0223643	9	5	0.319677	Ppup037010.1, Ppup050410.1, Ppup065950.1, Ppup139800.1, Ppup168760.1
GO:0046337	BP	e	phosphatidylethanolamine metabolic process	5/2424	8/10157	0.0223643	7	5	0.319677	Ppup044790.1, Ppup094670.1, Ppup106700.1, Ppup152280.1, Ppup162420.1
GO:0035195	BP	e	gene silencing by miRNA	5/2424	8/10157	0.0223643	10	5	0.319677	Ppup027520.1, Ppup050410.1, Ppup064000.1, Ppup086780.1, Ppup154750.1
GO:0010803	BP	e	regulation of tumor necrosis factor-mediated signaling pathway	5/2424	8/10157	0.0223643	7	5	0.319677	Ppup012830.1, Ppup050170.1, Ppup054230.1, Ppup112100.1, Ppup162360.1
GO:0009409	BP	e	response to cold	5/2424	8/10157	0.0223643	4	5	0.319677	Ppup018070.1, Ppup021150.1, Ppup027250.1, Ppup116770.1, Ppup136110.1
GO:1900273	BP	e	positive regulation of long-term synaptic potentiation	5/2424	8/10157	0.0223643	9	5	0.319677	Ppup025100.1, Ppup048770.1, Ppup064880.1, Ppup098040.1, Ppup165290.1
GO:1903579	BP	e	negative regulation of ATP metabolic process	5/2424	8/10157	0.0223643	5	5	0.319677	Ppup052760.1, Ppup057830.1, Ppup123000.1, Ppup125780.1, Ppup160690.1
GO:0035066	BP	e	positive regulation of histone acetylation	5/2424	8/10157	0.0223643	11	5	0.319677	Ppup035070.1, Ppup042410.1, Ppup043580.1, Ppup122630.1, Ppup140050.1
GO:0031179	BP	e	peptide modification	5/2424	8/10157	0.0223643	6	5	0.319677	Ppup022030.1, Ppup140340.1, Ppup147780.1, Ppup160680.1, Ppup168100.1
GO:0006984	BP	e	ER-nucleus signaling pathway	5/2424	8/10157	0.0223643	5	5	0.319677	Ppup021150.1, Ppup092790.1, Ppup108140.1, Ppup114920.1, Ppup126800.1
GO:0006677	BP	e	glycosylceramide metabolic process	5/2424	8/10157	0.0223643	8	5	0.319677	Ppup004080.1, Ppup029370.1, Ppup138760.1, Ppup140310.1, Ppup173320.1
GO:0030951	BP	e	establishment or maintenance of microtubule cytoskeleton polarity	5/2424	8/10157	0.0223643	7	5	0.319677	Ppup085930.1, Ppup086980.1, Ppup140100.1, Ppup157110.1, Ppup168280.1
GO:0038083	BP	e	peptidyl-tyrosine autophosphorylation	5/2424	8/10157	0.0223643	10	5	0.319677	Ppup058840.1, Ppup071370.1, Ppup086990.1, Ppup101280.1, Ppup174910.1
GO:2001024	BP	e	negative regulation of response to drug	5/2424	8/10157	0.0223643	5	5	0.319677	Ppup027490.1, Ppup062600.1, Ppup084440.1, Ppup124080.1, Ppup173320.1
GO:0050714	BP	e	positive regulation of protein secretion	18/2424	46/10157	0.0226477	8	18	0.323316	Ppup002780.1, Ppup010280.1, Ppup011470.1, Ppup017930.1, Ppup027680.1, Ppup043200.1, Ppup057910.1, Ppup069310.1, Ppup075960.1, Ppup086470.1, Ppup104600.1, Ppup109260.1, Ppup109420.1, Ppup109430.1, Ppup137390.1, Ppup138910.1, Ppup144260.1, Ppup165290.1
GO:0009886	BP	e	post-embryonic animal morphogenesis	46/2424	143/10157	0.0227911	3	46	0.324947	Ppup006660.1, Ppup008020.1, Ppup017950.1, Ppup019200.1, Ppup021200.1, Ppup022170.1, Ppup025490.1, Ppup027050.1, Ppup031700.1, Ppup039090.1, Ppup042450.1, Ppup045470.1, Ppup050680.1, Ppup058840.1, Ppup059650.1, Ppup063470.1, Ppup064850.1, Ppup069510.1, Ppup075230.1, Ppup075540.1, Ppup092910.1, Ppup092930.1, Ppup096760.1, Ppup099550.1, Ppup103270.1, Ppup104560.1, Ppup104710.1, Ppup109360.1, Ppup110…
GO:0006511	BP	e	ubiquitin-dependent protein catabolic process	109/2424	378/10157	0.02286	8	109	0.325514	Ppup001710.1, Ppup002450.1, Ppup002900.1, Ppup003610.1, Ppup004410.1, Ppup004570.1, Ppup006490.1, Ppup008760.1, Ppup012830.1, Ppup018680.1, Ppup018870.1, Ppup019010.1, Ppup019430.1, Ppup019820.1, Ppup020080.1, Ppup021070.1, Ppup023070.1, Ppup026220.1, Ppup026960.1, Ppup028140.1, Ppup031510.1, Ppup031610.1, Ppup033270.1, Ppup038210.1, Ppup039050.1, Ppup039790.1, Ppup040670.1, Ppup043150.1, Ppup045…
GO:0007623	BP	e	circadian rhythm	30/2424	87/10157	0.0229843	2	30	0.326841	Ppup001800.1, Ppup003620.1, Ppup003740.1, Ppup010190.1, Ppup018590.1, Ppup026960.1, Ppup037330.1, Ppup037540.1, Ppup040750.1, Ppup040930.1, Ppup045860.1, Ppup058370.1, Ppup058840.1, Ppup059960.1, Ppup064000.1, Ppup091970.1, Ppup095740.1, Ppup104550.1, Ppup109360.1, Ppup117200.1, Ppup126170.1, Ppup130180.1, Ppup143520.1, Ppup144200.1, Ppup144280.1, Ppup151000.1, Ppup168340.1, Ppup173830.1, Ppup174…
GO:0097190	BP	e	apoptotic signaling pathway	20/2424	53/10157	0.0230116	5	20	0.326841	Ppup002790.1, Ppup002900.1, Ppup030870.1, Ppup031660.1, Ppup037010.1, Ppup037560.1, Ppup048420.1, Ppup059860.1, Ppup076270.1, Ppup076280.1, Ppup092470.1, Ppup093660.1, Ppup101240.1, Ppup122670.1, Ppup125290.1, Ppup126130.1, Ppup127830.1, Ppup152000.1, Ppup160690.1, Ppup171880.1
GO:0007265	BP	e	Ras protein signal transduction	28/2424	79/10157	0.0232692	7	28	0.33008	Ppup010070.1, Ppup016230.1, Ppup020290.1, Ppup022170.1, Ppup028260.1, Ppup042150.1, Ppup049760.1, Ppup052220.1, Ppup058460.1, Ppup074730.1, Ppup075410.1, Ppup075720.1, Ppup076820.1, Ppup084350.1, Ppup086470.1, Ppup095200.1, Ppup099660.1, Ppup102180.1, Ppup106330.1, Ppup107050.1, Ppup108120.1, Ppup113560.1, Ppup123220.1, Ppup142610.1, Ppup145760.1, Ppup156210.1, Ppup165990.1, Ppup167550.1
GO:0045995	BP	e	regulation of embryonic development	23/2424	62/10157	0.0236488	5	23	0.33504	Ppup003170.1, Ppup004180.1, Ppup007690.1, Ppup024570.1, Ppup027240.1, Ppup050810.1, Ppup058100.1, Ppup058840.1, Ppup061290.1, Ppup075970.1, Ppup084080.1, Ppup087330.1, Ppup091990.1, Ppup095010.1, Ppup096760.1, Ppup103750.1, Ppup113230.1, Ppup127830.1, Ppup135280.1, Ppup140190.1, Ppup142950.1, Ppup146870.1, Ppup157110.1
GO:1901889	BP	e	negative regulation of cell junction assembly	10/2424	22/10157	0.0239473	6	10	0.335863	Ppup027690.1, Ppup059940.1, Ppup064250.1, Ppup071370.1, Ppup084450.1, Ppup101280.1, Ppup112100.1, Ppup116890.1, Ppup120140.1, Ppup174910.1
GO:0010822	BP	e	positive regulation of mitochondrion organization	10/2424	22/10157	0.0239473	7	10	0.335863	Ppup017930.1, Ppup029460.1, Ppup047070.1, Ppup050170.1, Ppup075690.1, Ppup095230.1, Ppup101240.1, Ppup140310.1, Ppup153590.1, Ppup169820.1
GO:0043171	BP	e	peptide catabolic process	10/2424	22/10157	0.0239473	6	10	0.335863	Ppup022030.1, Ppup046080.1, Ppup047070.1, Ppup049000.1, Ppup049080.1, Ppup063940.1, Ppup077310.1, Ppup096180.1, Ppup160680.1, Ppup168100.1
GO:0009126	BP	e	purine nucleoside monophosphate metabolic process	10/2424	22/10157	0.0239473	8	10	0.335863	Ppup050580.1, Ppup052600.1, Ppup071520.1, Ppup083660.1, Ppup093290.1, Ppup105390.1, Ppup106400.1, Ppup122750.1, Ppup122800.1, Ppup126890.1
GO:0045494	BP	e	photoreceptor cell maintenance	10/2424	22/10157	0.0239473	2	10	0.335863	Ppup004450.1, Ppup007690.1, Ppup013010.1, Ppup025820.1, Ppup040930.1, Ppup041140.1, Ppup062660.1, Ppup079870.1, Ppup123340.1, Ppup141950.1
GO:0034198	BP	e	cellular response to amino acid starvation	10/2424	22/10157	0.0239473	7	10	0.335863	Ppup016190.1, Ppup021150.1, Ppup021300.1, Ppup027200.1, Ppup035420.1, Ppup092000.1, Ppup116700.1, Ppup134150.1, Ppup138770.1, Ppup149590.1
GO:0045292	BP	e	mRNA cis splicing, via spliceosome	10/2424	22/10157	0.0239473	12	10	0.335863	Ppup010940.1, Ppup046960.1, Ppup069210.1, Ppup069390.1, Ppup075970.1, Ppup085980.1, Ppup123010.1, Ppup134050.1, Ppup154750.1, Ppup161160.1
GO:0009167	BP	e	purine ribonucleoside monophosphate metabolic process	10/2424	22/10157	0.0239473	9	10	0.335863	Ppup050580.1, Ppup052600.1, Ppup071520.1, Ppup083660.1, Ppup093290.1, Ppup105390.1, Ppup106400.1, Ppup122750.1, Ppup122800.1, Ppup126890.1
GO:0009165	BP	e	nucleotide biosynthetic process	43/2424	133/10157	0.0242153	8	43	0.339197	Ppup001740.1, Ppup003740.1, Ppup004480.1, Ppup005850.1, Ppup009850.1, Ppup011470.1, Ppup016890.1, Ppup040660.1, Ppup045850.1, Ppup046280.1, Ppup050190.1, Ppup052580.1, Ppup052600.1, Ppup071520.1, Ppup075400.1, Ppup075450.1, Ppup083660.1, Ppup090400.1, Ppup092170.1, Ppup093290.1, Ppup093570.1, Ppup095050.1, Ppup095440.1, Ppup105390.1, Ppup106400.1, Ppup115240.1, Ppup122750.1, Ppup122800.1, Ppup124…
GO:0048870	BP	e	cell motility	85/2424	287/10157	0.0243626	3	85	0.340833	Ppup001870.1, Ppup003170.1, Ppup003910.1, Ppup004200.1, Ppup005460.1, Ppup005490.1, Ppup010900.1, Ppup011200.1, Ppup014360.1, Ppup017950.1, Ppup018760.1, Ppup021210.1, Ppup021490.1, Ppup022170.1, Ppup025130.1, Ppup026660.1, Ppup026670.1, Ppup027500.1, Ppup036280.1, Ppup037540.1, Ppup039320.1, Ppup042150.1, Ppup043440.1, Ppup047250.1, Ppup048860.1, Ppup053410.1, Ppup057910.1, Ppup058840.1, Ppup059…
GO:0050867	BP	e	positive regulation of cell activation	14/2424	34/10157	0.0251236	5	14	0.350601	Ppup020500.1, Ppup037880.1, Ppup048850.1, Ppup058040.1, Ppup066020.1, Ppup069210.1, Ppup069390.1, Ppup109060.1, Ppup109790.1, Ppup123820.1, Ppup140050.1, Ppup153110.1, Ppup162360.1, Ppup172340.1
GO:1901983	BP	e	regulation of protein acetylation	12/2424	28/10157	0.0252563	8	12	0.351576	Ppup005470.1, Ppup026960.1, Ppup033420.1, Ppup035070.1, Ppup042410.1, Ppup043580.1, Ppup057830.1, Ppup075380.1, Ppup080180.1, Ppup122630.1, Ppup140050.1, Ppup171790.1
GO:1905879	BP	e	regulation of oogenesis	12/2424	28/10157	0.0252563	6	12	0.351576	Ppup004180.1, Ppup040010.1, Ppup104330.1, Ppup109360.1, Ppup112480.1, Ppup113230.1, Ppup123910.1, Ppup135280.1, Ppup140190.1, Ppup142950.1, Ppup145680.1, Ppup157110.1
GO:0048563	BP	e	post-embryonic animal organ morphogenesis	18/2424	47/10157	0.0253411	4	18	0.351879	Ppup008020.1, Ppup021200.1, Ppup025490.1, Ppup039090.1, Ppup042450.1, Ppup045470.1, Ppup058840.1, Ppup069510.1, Ppup099550.1, Ppup104710.1, Ppup114470.1, Ppup123780.1, Ppup131840.1, Ppup137460.1, Ppup145680.1, Ppup150610.1, Ppup152740.1, Ppup166580.1
GO:0008203	BP	e	cholesterol metabolic process	18/2424	47/10157	0.0253411	6	18	0.351879	Ppup010210.1, Ppup039320.1, Ppup043200.1, Ppup047250.1, Ppup060140.1, Ppup075190.1, Ppup101160.1, Ppup104600.1, Ppup108140.1, Ppup109420.1, Ppup109430.1, Ppup126800.1, Ppup137980.1, Ppup140310.1, Ppup162150.1, Ppup162270.1, Ppup165030.1, Ppup171790.1
GO:0042327	BP	e	positive regulation of phosphorylation	68/2424	224/10157	0.0261445	8	68	0.361687	Ppup005280.1, Ppup006490.1, Ppup013130.1, Ppup017930.1, Ppup022170.1, Ppup024570.1, Ppup026440.1, Ppup027410.1, Ppup027810.1, Ppup028810.1, Ppup030870.1, Ppup035940.1, Ppup036080.1, Ppup036980.1, Ppup037560.1, Ppup044130.1, Ppup044250.1, Ppup048770.1, Ppup049390.1, Ppup057310.1, Ppup057830.1, Ppup062600.1, Ppup075760.1, Ppup075960.1, Ppup077440.1, Ppup083740.1, Ppup084440.1, Ppup085820.1, Ppup086…
GO:0003006	BP	e	developmental process involved in reproduction	153/2424	549/10157	0.0267571	2	153	0.369242	Ppup001870.1, Ppup004410.1, Ppup007260.1, Ppup008020.1, Ppup008030.1, Ppup008570.1, Ppup015880.1, Ppup015890.1, Ppup017950.1, Ppup018070.1, Ppup018590.1, Ppup018600.1, Ppup018870.1, Ppup021200.1, Ppup021300.1, Ppup021490.1, Ppup022030.1, Ppup022170.1, Ppup023070.1, Ppup024270.1, Ppup026660.1, Ppup026670.1, Ppup026960.1, Ppup027050.1, Ppup027070.1, Ppup027410.1, Ppup027500.1, Ppup027680.1, Ppup027…
GO:0032366	BP	e	intracellular sterol transport	9/2424	19/10157	0.0269548	7	9	0.369242	Ppup043200.1, Ppup057820.1, Ppup075190.1, Ppup075410.1, Ppup104600.1, Ppup109420.1, Ppup109430.1, Ppup123320.1, Ppup137980.1
GO:0035418	BP	e	protein localization to synapse	9/2424	19/10157	0.0269548	5	9	0.369242	Ppup004150.1, Ppup010280.1, Ppup024560.1, Ppup075410.1, Ppup106330.1, Ppup109360.1, Ppup130860.1, Ppup137460.1, Ppup140190.1
GO:0006998	BP	e	nuclear envelope organization	9/2424	19/10157	0.0269548	5	9	0.369242	Ppup005470.1, Ppup007170.1, Ppup018600.1, Ppup052530.1, Ppup075470.1, Ppup075750.1, Ppup092530.1, Ppup115290.1, Ppup171700.1
GO:0051084	BP	e	'de novo' posttranslational protein folding	9/2424	19/10157	0.0269548	4	9	0.369242	Ppup004040.1, Ppup021070.1, Ppup028830.1, Ppup053850.1, Ppup063060.1, Ppup075210.1, Ppup104910.1, Ppup145840.1, Ppup168410.1
GO:0001504	BP	e	neurotransmitter uptake	9/2424	19/10157	0.0269548	5	9	0.369242	Ppup004420.1, Ppup010920.1, Ppup052820.1, Ppup085610.1, Ppup086080.1, Ppup096580.1, Ppup106580.1, Ppup114130.1, Ppup132870.1
GO:0001959	BP	e	regulation of cytokine-mediated signaling pathway	9/2424	19/10157	0.0269548	6	9	0.369242	Ppup012830.1, Ppup027520.1, Ppup040010.1, Ppup050170.1, Ppup054230.1, Ppup111590.1, Ppup112100.1, Ppup135100.1, Ppup162360.1
GO:1903039	BP	e	positive regulation of leukocyte cell-cell adhesion	9/2424	19/10157	0.0269548	7	9	0.369242	Ppup037880.1, Ppup038890.1, Ppup048850.1, Ppup058040.1, Ppup069210.1, Ppup069390.1, Ppup109060.1, Ppup153110.1, Ppup162360.1
GO:0043408	BP	e	regulation of MAPK cascade	48/2424	152/10157	0.0274535	9	48	0.369532	Ppup001800.1, Ppup005280.1, Ppup005320.1, Ppup006490.1, Ppup010070.1, Ppup014250.1, Ppup022170.1, Ppup024570.1, Ppup028810.1, Ppup035940.1, Ppup037560.1, Ppup049390.1, Ppup054230.1, Ppup057830.1, Ppup062600.1, Ppup075720.1, Ppup076270.1, Ppup076280.1, Ppup077440.1, Ppup081850.1, Ppup082620.1, Ppup083600.1, Ppup084440.1, Ppup085820.1, Ppup086710.1, Ppup094070.1, Ppup096980.1, Ppup101280.1, Ppup104…
GO:0072413	BP	e	signal transduction involved in mitotic cell cycle checkpoint	6/2424	11/10157	0.027505	7	6	0.369532	Ppup021180.1, Ppup027520.1, Ppup093660.1, Ppup138980.1, Ppup141700.1, Ppup144760.1
GO:0048102	BP	e	autophagic cell death	6/2424	11/10157	0.027505	4	6	0.369532	Ppup027050.1, Ppup101240.1, Ppup105750.1, Ppup120290.1, Ppup130170.1, Ppup154510.1
GO:0106056	BP	e	regulation of calcineurin-mediated signaling	6/2424	11/10157	0.027505	8	6	0.369532	Ppup004550.1, Ppup038890.1, Ppup059950.1, Ppup097670.1, Ppup109830.1, Ppup109840.1
GO:0045924	BP	e	regulation of female receptivity	6/2424	11/10157	0.027505	6	6	0.369532	Ppup086960.1, Ppup086980.1, Ppup112480.1, Ppup115630.1, Ppup154550.1, Ppup166580.1
GO:0070167	BP	e	regulation of biomineral tissue development	6/2424	11/10157	0.027505	5	6	0.369532	Ppup005470.1, Ppup019930.1, Ppup036080.1, Ppup084230.1, Ppup099860.1, Ppup105970.1
GO:0071260	BP	e	cellular response to mechanical stimulus	6/2424	11/10157	0.027505	5	6	0.369532	Ppup062600.1, Ppup065840.1, Ppup086470.1, Ppup091760.1, Ppup101240.1, Ppup123000.1
GO:0033522	BP	e	histone H2A ubiquitination	6/2424	11/10157	0.027505	11	6	0.369532	Ppup013200.1, Ppup018870.1, Ppup039790.1, Ppup046570.1, Ppup091670.1, Ppup146820.1
GO:0110149	BP	e	regulation of biomineralization	6/2424	11/10157	0.027505	3	6	0.369532	Ppup005470.1, Ppup019930.1, Ppup036080.1, Ppup084230.1, Ppup099860.1, Ppup105970.1
GO:1904580	BP	e	regulation of intracellular mRNA localization	6/2424	11/10157	0.027505	5	6	0.369532	Ppup004180.1, Ppup113230.1, Ppup135280.1, Ppup140190.1, Ppup157110.1, Ppup164150.1
GO:0042332	BP	e	gravitaxis	6/2424	11/10157	0.027505	4	6	0.369532	Ppup031700.1, Ppup086960.1, Ppup094290.1, Ppup109360.1, Ppup146090.1, Ppup160840.1
GO:0060148	BP	e	positive regulation of posttranscriptional gene silencing	6/2424	11/10157	0.027505	8	6	0.369532	Ppup037010.1, Ppup050410.1, Ppup065950.1, Ppup086560.1, Ppup139800.1, Ppup168760.1
GO:0010888	BP	e	negative regulation of lipid storage	6/2424	11/10157	0.027505	6	6	0.369532	Ppup043200.1, Ppup075760.1, Ppup104600.1, Ppup109420.1, Ppup109430.1, Ppup133890.1
GO:0070884	BP	e	regulation of calcineurin-NFAT signaling cascade	6/2424	11/10157	0.027505	9	6	0.369532	Ppup004550.1, Ppup038890.1, Ppup059950.1, Ppup097670.1, Ppup109830.1, Ppup109840.1
GO:0120162	BP	e	positive regulation of cold-induced thermogenesis	6/2424	11/10157	0.027505	5	6	0.369532	Ppup045850.1, Ppup051070.1, Ppup062320.1, Ppup087280.1, Ppup144760.1, Ppup176270.1
GO:0000165	BP	e	MAPK cascade	16/2424	41/10157	0.0276437	9	16	0.369619	Ppup008760.1, Ppup035940.1, Ppup058100.1, Ppup086990.1, Ppup098040.1, Ppup107050.1, Ppup112100.1, Ppup114980.1, Ppup114990.1, Ppup115100.1, Ppup117200.1, Ppup126130.1, Ppup134990.1, Ppup145680.1, Ppup151000.1, Ppup156210.1
GO:1905037	BP	e	autophagosome organization	16/2424	41/10157	0.0276437	6	16	0.369619	Ppup012590.1, Ppup049570.1, Ppup054530.1, Ppup058440.1, Ppup084770.1, Ppup099640.1, Ppup110950.1, Ppup116340.1, Ppup122320.1, Ppup122830.1, Ppup126550.1, Ppup133260.1, Ppup140310.1, Ppup145020.1, Ppup161610.1, Ppup169690.1
GO:0050796	BP	e	regulation of insulin secretion	16/2424	41/10157	0.0276437	9	16	0.369619	Ppup010280.1, Ppup011470.1, Ppup014360.1, Ppup017930.1, Ppup025880.1, Ppup026960.1, Ppup062600.1, Ppup069310.1, Ppup075960.1, Ppup086470.1, Ppup109260.1, Ppup137390.1, Ppup138910.1, Ppup139120.1, Ppup149470.1, Ppup165290.1
GO:0043900	BP	e	regulation of multi-organism process	16/2424	41/10157	0.0276437	3	16	0.369619	Ppup004180.1, Ppup021950.1, Ppup027200.1, Ppup040010.1, Ppup095370.1, Ppup104330.1, Ppup109360.1, Ppup112480.1, Ppup113230.1, Ppup123910.1, Ppup133890.1, Ppup135280.1, Ppup140190.1, Ppup142950.1, Ppup145680.1, Ppup157110.1
GO:0007399	BP	e	nervous system development	32/2424	94/10157	0.0277945	4	32	0.371191	Ppup009190.1, Ppup011180.1, Ppup014270.1, Ppup017570.1, Ppup018630.1, Ppup024560.1, Ppup042910.1, Ppup052950.1, Ppup052960.1, Ppup058840.1, Ppup063440.1, Ppup075580.1, Ppup076270.1, Ppup076280.1, Ppup086080.1, Ppup095370.1, Ppup097670.1, Ppup109360.1, Ppup109830.1, Ppup109840.1, Ppup116900.1, Ppup123780.1, Ppup126170.1, Ppup137670.1, Ppup142730.1, Ppup144360.1, Ppup145740.1, Ppup146590.1, Ppup151…
GO:0071345	BP	e	cellular response to cytokine stimulus	26/2424	74/10157	0.0279787	5	26	0.373205	Ppup002480.1, Ppup021090.1, Ppup025100.1, Ppup026790.1, Ppup035800.1, Ppup038890.1, Ppup043580.1, Ppup049720.1, Ppup075430.1, Ppup083660.1, Ppup094070.1, Ppup094610.1, Ppup112100.1, Ppup112420.1, Ppup113130.1, Ppup122670.1, Ppup122870.1, Ppup123000.1, Ppup123010.1, Ppup123820.1, Ppup124100.1, Ppup133900.1, Ppup140310.1, Ppup143800.1, Ppup146980.1, Ppup161560.1
GO:0008360	BP	e	regulation of cell shape	21/2424	57/10157	0.028146	6	21	0.374989	Ppup001870.1, Ppup005470.1, Ppup018760.1, Ppup019100.1, Ppup019160.1, Ppup022170.1, Ppup058840.1, Ppup063520.1, Ppup071180.1, Ppup071370.1, Ppup077190.1, Ppup086270.1, Ppup087330.1, Ppup093550.1, Ppup110970.1, Ppup114260.1, Ppup122670.1, Ppup140860.1, Ppup142950.1, Ppup152410.1, Ppup161160.1
GO:0048193	BP	e	Golgi vesicle transport	57/2424	184/10157	0.0286779	5	57	0.381167	Ppup003070.1, Ppup003780.1, Ppup004330.1, Ppup006390.1, Ppup007260.1, Ppup009830.1, Ppup020500.1, Ppup020770.1, Ppup021890.1, Ppup028260.1, Ppup029350.1, Ppup031560.1, Ppup035330.1, Ppup040260.1, Ppup046930.1, Ppup048800.1, Ppup048860.1, Ppup050340.1, Ppup050700.1, Ppup052220.1, Ppup054430.1, Ppup063840.1, Ppup081800.1, Ppup085760.1, Ppup086490.1, Ppup086720.1, Ppup091320.1, Ppup092450.1, Ppup092…
GO:0019751	BP	e	polyol metabolic process	19/2424	50/10157	0.0288761	5	19	0.382892	Ppup006440.1, Ppup020690.1, Ppup035830.1, Ppup052630.1, Ppup062660.1, Ppup092480.1, Ppup094070.1, Ppup111860.1, Ppup113500.1, Ppup123890.1, Ppup130150.1, Ppup134680.1, Ppup136110.1, Ppup140050.1, Ppup140310.1, Ppup142860.1, Ppup156220.1, Ppup157240.1, Ppup163850.1
GO:0008344	BP	e	adult locomotory behavior	19/2424	50/10157	0.0288761	3	19	0.382892	Ppup005470.1, Ppup010280.1, Ppup018600.1, Ppup024570.1, Ppup027280.1, Ppup037560.1, Ppup059350.1, Ppup062660.1, Ppup074880.1, Ppup075690.1, Ppup096260.1, Ppup120140.1, Ppup130150.1, Ppup137940.1, Ppup138780.1, Ppup139870.1, Ppup144880.1, Ppup145930.1, Ppup168340.1
GO:0072659	BP	e	protein localization to plasma membrane	35/2424	106/10157	0.0295898	6	35	0.388044	Ppup003230.1, Ppup009830.1, Ppup011220.1, Ppup022170.1, Ppup026440.1, Ppup027410.1, Ppup040260.1, Ppup050700.1, Ppup058800.1, Ppup063370.1, Ppup075410.1, Ppup081800.1, Ppup093240.1, Ppup093840.1, Ppup094070.1, Ppup099690.1, Ppup106330.1, Ppup108120.1, Ppup110550.1, Ppup112100.1, Ppup113790.1, Ppup122320.1, Ppup123780.1, Ppup124500.1, Ppup126930.1, Ppup133960.1, Ppup135110.1, Ppup137460.1, Ppup145…
GO:0016579	BP	e	protein deubiquitination	29/2424	85/10157	0.0298452	9	29	0.388823	Ppup001710.1, Ppup010900.1, Ppup018690.1, Ppup019430.1, Ppup021280.1, Ppup021570.1, Ppup026220.1, Ppup031610.1, Ppup035800.1, Ppup041460.1, Ppup043580.1, Ppup082560.1, Ppup086460.1, Ppup087280.1, Ppup094610.1, Ppup113360.1, Ppup114460.1, Ppup114980.1, Ppup114990.1, Ppup122870.1, Ppup123220.1, Ppup127040.1, Ppup128890.1, Ppup140010.1, Ppup140070.1, Ppup141670.1, Ppup142110.1, Ppup162360.1, Ppup167…
GO:1990928	BP	e	response to amino acid starvation	11/2424	25/10157	0.0307858	6	11	0.392944	Ppup016190.1, Ppup021150.1, Ppup021300.1, Ppup027200.1, Ppup035420.1, Ppup076900.1, Ppup092000.1, Ppup116700.1, Ppup134150.1, Ppup138770.1, Ppup149590.1
GO:0023014	BP	e	signal transduction by protein phosphorylation	21/2424	58/10157	0.0309675	8	21	0.392944	Ppup008760.1, Ppup027810.1, Ppup028810.1, Ppup035940.1, Ppup058100.1, Ppup086990.1, Ppup098040.1, Ppup107050.1, Ppup110180.1, Ppup112100.1, Ppup114980.1, Ppup114990.1, Ppup115100.1, Ppup117200.1, Ppup125290.1, Ppup126130.1, Ppup134990.1, Ppup145680.1, Ppup150050.1, Ppup151000.1, Ppup156210.1
GO:0061572	BP	e	actin filament bundle organization	15/2424	37/10157	0.0310126	6	15	0.392944	Ppup020360.1, Ppup020370.1, Ppup027050.1, Ppup063140.1, Ppup087330.1, Ppup092160.1, Ppup101280.1, Ppup103510.1, Ppup119510.1, Ppup126130.1, Ppup140190.1, Ppup142060.1, Ppup165030.1, Ppup171700.1, Ppup174910.1
GO:0007416	BP	e	synapse assembly	15/2424	37/10157	0.0310126	6	15	0.392944	Ppup008830.1, Ppup010280.1, Ppup024570.1, Ppup026370.1, Ppup055840.1, Ppup074880.1, Ppup098040.1, Ppup103750.1, Ppup109360.1, Ppup112480.1, Ppup115170.1, Ppup125740.1, Ppup137670.1, Ppup137940.1, Ppup167630.1
GO:0043436	BP	e	oxoacid metabolic process	140/2424	501/10157	0.0314338	4	140	0.392944	Ppup001760.1, Ppup001870.1, Ppup002290.1, Ppup003130.1, Ppup003740.1, Ppup005460.1, Ppup005600.1, Ppup006190.1, Ppup006550.1, Ppup009640.1, Ppup009900.1, Ppup010470.1, Ppup011120.1, Ppup019840.1, Ppup022030.1, Ppup024400.1, Ppup025130.1, Ppup025770.1, Ppup025880.1, Ppup026550.1, Ppup027910.1, Ppup027920.1, Ppup027930.1, Ppup028780.1, Ppup029370.1, Ppup031730.1, Ppup037550.1, Ppup037640.1, Ppup039…
GO:0016236	BP	e	macroautophagy	17/2424	44/10157	0.0315302	5	17	0.392944	Ppup019820.1, Ppup021570.1, Ppup022310.1, Ppup028400.1, Ppup048770.1, Ppup049570.1, Ppup051070.1, Ppup053410.1, Ppup058440.1, Ppup084770.1, Ppup085530.1, Ppup116340.1, Ppup119520.1, Ppup122830.1, Ppup126550.1, Ppup171790.1, Ppup173600.1
GO:0042119	BP	e	neutrophil activation	17/2424	44/10157	0.0315302	6	17	0.392944	Ppup001870.1, Ppup043610.1, Ppup053510.1, Ppup061660.1, Ppup082260.1, Ppup086420.1, Ppup091630.1, Ppup102180.1, Ppup116770.1, Ppup122120.1, Ppup124670.1, Ppup152050.1, Ppup166870.1, Ppup171660.1, Ppup172290.1, Ppup173320.1, Ppup173440.1
GO:0036230	BP	e	granulocyte activation	17/2424	44/10157	0.0315302	5	17	0.392944	Ppup001870.1, Ppup043610.1, Ppup053510.1, Ppup061660.1, Ppup082260.1, Ppup086420.1, Ppup091630.1, Ppup102180.1, Ppup116770.1, Ppup122120.1, Ppup124670.1, Ppup152050.1, Ppup166870.1, Ppup171660.1, Ppup172290.1, Ppup173320.1, Ppup173440.1
GO:0036294	BP	e	cellular response to decreased oxygen levels	13/2424	31/10157	0.0317292	5	13	0.392944	Ppup009230.1, Ppup009340.1, Ppup017950.1, Ppup027280.1, Ppup043150.1, Ppup047070.1, Ppup094510.1, Ppup101240.1, Ppup122830.1, Ppup122880.1, Ppup124080.1, Ppup143800.1, Ppup152000.1
GO:0034720	BP	e	histone H3-K4 demethylation	4/2424	6/10157	0.0318841	11	4	0.392944	Ppup035890.1, Ppup058370.1, Ppup079170.1, Ppup091670.1
GO:0097320	BP	e	plasma membrane tubulation	4/2424	6/10157	0.0318841	6	4	0.392944	Ppup012590.1, Ppup013930.1, Ppup093440.1, Ppup145980.1
GO:0072697	BP	e	protein localization to cell cortex	4/2424	6/10157	0.0318841	6	4	0.392944	Ppup053540.1, Ppup077190.1, Ppup133060.1, Ppup160440.1
GO:1903205	BP	e	regulation of hydrogen peroxide-induced cell death	4/2424	6/10157	0.0318841	8	4	0.392944	Ppup027490.1, Ppup084440.1, Ppup124080.1, Ppup173320.1
GO:0090141	BP	e	positive regulation of mitochondrial fission	4/2424	6/10157	0.0318841	8	4	0.392944	Ppup095230.1, Ppup101240.1, Ppup153590.1, Ppup169820.1
GO:0042810	BP	e	pheromone metabolic process	4/2424	6/10157	0.0318841	5	4	0.392944	Ppup074200.1, Ppup077330.1, Ppup087190.1, Ppup097110.1
GO:0035024	BP	e	negative regulation of Rho protein signal transduction	4/2424	6/10157	0.0318841	10	4	0.392944	Ppup005490.1, Ppup057830.1, Ppup114420.1, Ppup126130.1
GO:1900620	BP	e	acetate ester biosynthetic process	4/2424	6/10157	0.0318841	4	4	0.392944	Ppup144960.1, Ppup144970.1, Ppup168300.1, Ppup168320.1
GO:0006977	BP	e	DNA damage response, signal transduction by p53 class mediator resulting in cell cycle arrest	4/2424	6/10157	0.0318841	11	4	0.392944	Ppup027520.1, Ppup138980.1, Ppup141700.1, Ppup144760.1
GO:0034374	BP	e	low-density lipoprotein particle remodeling	4/2424	6/10157	0.0318841	8	4	0.392944	Ppup043200.1, Ppup104600.1, Ppup109420.1, Ppup109430.1
GO:0048041	BP	e	focal adhesion assembly	4/2424	6/10157	0.0318841	7	4	0.392944	Ppup042910.1, Ppup103510.1, Ppup134010.1, Ppup147010.1
GO:0008645	BP	e	hexose transmembrane transport	4/2424	6/10157	0.0318841	8	4	0.392944	Ppup027280.1, Ppup043610.1, Ppup071180.1, Ppup140860.1
GO:0045980	BP	e	negative regulation of nucleotide metabolic process	4/2424	6/10157	0.0318841	8	4	0.392944	Ppup052760.1, Ppup057830.1, Ppup125780.1, Ppup160690.1
GO:0042811	BP	e	pheromone biosynthetic process	4/2424	6/10157	0.0318841	6	4	0.392944	Ppup074200.1, Ppup077330.1, Ppup087190.1, Ppup097110.1
GO:0055075	BP	e	potassium ion homeostasis	4/2424	6/10157	0.0318841	8	4	0.392944	Ppup020100.1, Ppup122620.1, Ppup127350.1, Ppup137940.1
GO:0071403	BP	e	cellular response to high density lipoprotein particle stimulus	4/2424	6/10157	0.0318841	4	4	0.392944	Ppup043200.1, Ppup104600.1, Ppup109420.1, Ppup109430.1
GO:0001816	BP	e	cytokine production	4/2424	6/10157	0.0318841	2	4	0.392944	Ppup038890.1, Ppup043580.1, Ppup083600.1, Ppup116340.1
GO:0006646	BP	e	phosphatidylethanolamine biosynthetic process	4/2424	6/10157	0.0318841	8	4	0.392944	Ppup044790.1, Ppup106700.1, Ppup152280.1, Ppup162420.1
GO:0007205	BP	e	protein kinase C-activating G protein-coupled receptor signaling pathway	4/2424	6/10157	0.0318841	6	4	0.392944	Ppup004450.1, Ppup011620.1, Ppup052290.1, Ppup122880.1
GO:0033700	BP	e	phospholipid efflux	4/2424	6/10157	0.0318841	8	4	0.392944	Ppup043200.1, Ppup104600.1, Ppup109420.1, Ppup109430.1
GO:0034219	BP	e	carbohydrate transmembrane transport	4/2424	6/10157	0.0318841	6	4	0.392944	Ppup027280.1, Ppup043610.1, Ppup071180.1, Ppup140860.1
GO:0045035	BP	e	sensory organ precursor cell division	4/2424	6/10157	0.0318841	4	4	0.392944	Ppup053540.1, Ppup104710.1, Ppup130440.1, Ppup160440.1
GO:0015749	BP	e	monosaccharide transmembrane transport	4/2424	6/10157	0.0318841	7	4	0.392944	Ppup027280.1, Ppup043610.1, Ppup071180.1, Ppup140860.1
GO:0090153	BP	e	regulation of sphingolipid biosynthetic process	4/2424	6/10157	0.0318841	7	4	0.392944	Ppup017930.1, Ppup110130.1, Ppup140050.1, Ppup160900.1
GO:0010745	BP	e	negative regulation of macrophage derived foam cell differentiation	4/2424	6/10157	0.0318841	6	4	0.392944	Ppup043200.1, Ppup104600.1, Ppup109420.1, Ppup109430.1
GO:0002230	BP	e	positive regulation of defense response to virus by host	4/2424	6/10157	0.0318841	8	4	0.392944	Ppup027200.1, Ppup075380.1, Ppup082030.1, Ppup116340.1
GO:0006706	BP	e	steroid catabolic process	4/2424	6/10157	0.0318841	5	4	0.392944	Ppup047250.1, Ppup060140.1, Ppup131020.1, Ppup162270.1
GO:2000303	BP	e	regulation of ceramide biosynthetic process	4/2424	6/10157	0.0318841	8	4	0.392944	Ppup017930.1, Ppup110130.1, Ppup140050.1, Ppup160900.1
GO:0034383	BP	e	low-density lipoprotein particle clearance	4/2424	6/10157	0.0318841	3	4	0.392944	Ppup047250.1, Ppup060140.1, Ppup120280.1, Ppup162270.1
GO:0008292	BP	e	acetylcholine biosynthetic process	4/2424	6/10157	0.0318841	6	4	0.392944	Ppup144960.1, Ppup144970.1, Ppup168300.1, Ppup168320.1
GO:0009595	BP	e	detection of biotic stimulus	4/2424	6/10157	0.0318841	3	4	0.392944	Ppup035960.1, Ppup047250.1, Ppup060140.1, Ppup162270.1
GO:0098780	BP	e	response to mitochondrial depolarisation	4/2424	6/10157	0.0318841	4	4	0.392944	Ppup048770.1, Ppup054230.1, Ppup126550.1, Ppup140310.1
GO:2001014	BP	e	regulation of skeletal muscle cell differentiation	4/2424	6/10157	0.0318841	8	4	0.392944	Ppup026960.1, Ppup037010.1, Ppup085320.1, Ppup139070.1
GO:0006678	BP	e	glucosylceramide metabolic process	4/2424	6/10157	0.0318841	9	4	0.392944	Ppup004080.1, Ppup029370.1, Ppup138760.1, Ppup140310.1
GO:0070572	BP	e	positive regulation of neuron projection regeneration	4/2424	6/10157	0.0318841	10	4	0.392944	Ppup120140.1, Ppup144260.1, Ppup149470.1, Ppup167630.1
GO:2000171	BP	e	negative regulation of dendrite development	4/2424	6/10157	0.0318841	10	4	0.392944	Ppup004410.1, Ppup075890.1, Ppup115160.1, Ppup144230.1
GO:0048680	BP	e	positive regulation of axon regeneration	4/2424	6/10157	0.0318841	11	4	0.392944	Ppup120140.1, Ppup144260.1, Ppup149470.1, Ppup167630.1
GO:0042182	BP	e	ketone catabolic process	4/2424	6/10157	0.0318841	4	4	0.392944	Ppup069310.1, Ppup083190.1, Ppup096400.1, Ppup131020.1
GO:0034381	BP	e	plasma lipoprotein particle clearance	4/2424	6/10157	0.0318841	2	4	0.392944	Ppup047250.1, Ppup060140.1, Ppup120280.1, Ppup162270.1
GO:0070373	BP	e	negative regulation of ERK1 and ERK2 cascade	4/2424	6/10157	0.0318841	11	4	0.392944	Ppup014250.1, Ppup057830.1, Ppup104470.1, Ppup146370.1
GO:0018193	BP	e	peptidyl-amino acid modification	98/2424	340/10157	0.0325884	7	98	0.401182	Ppup001800.1, Ppup003120.1, Ppup004240.1, Ppup005260.1, Ppup005470.1, Ppup006830.1, Ppup008730.1, Ppup011260.1, Ppup011800.1, Ppup012810.1, Ppup012980.1, Ppup014100.1, Ppup018690.1, Ppup018760.1, Ppup019150.1, Ppup019460.1, Ppup019650.1, Ppup019810.1, Ppup019950.1, Ppup021180.1, Ppup021480.1, Ppup022280.1, Ppup025490.1, Ppup025690.1, Ppup025950.1, Ppup026830.1, Ppup027810.1, Ppup028340.1, Ppup028…
GO:0006508	BP	e	proteolysis	179/2424	654/10157	0.0327578	5	179	0.402823	Ppup001710.1, Ppup002450.1, Ppup002900.1, Ppup003610.1, Ppup004410.1, Ppup004570.1, Ppup005470.1, Ppup006490.1, Ppup006830.1, Ppup008760.1, Ppup010900.1, Ppup012830.1, Ppup018680.1, Ppup018690.1, Ppup018870.1, Ppup019010.1, Ppup019430.1, Ppup019820.1, Ppup020080.1, Ppup021070.1, Ppup021280.1, Ppup021570.1, Ppup022030.1, Ppup022310.1, Ppup023070.1, Ppup024510.1, Ppup025100.1, Ppup026000.1, Ppup026…
GO:1905953	BP	e	negative regulation of lipid localization	8/2424	16/10157	0.0332775	5	8	0.407868	Ppup043200.1, Ppup062600.1, Ppup075760.1, Ppup104600.1, Ppup109420.1, Ppup109430.1, Ppup133890.1, Ppup137390.1
GO:0051085	BP	e	chaperone cofactor-dependent protein refolding	8/2424	16/10157	0.0332775	5	8	0.407868	Ppup004040.1, Ppup021070.1, Ppup028830.1, Ppup053850.1, Ppup063060.1, Ppup075210.1, Ppup104910.1, Ppup145840.1
GO:0033206	BP	e	meiotic cytokinesis	8/2424	16/10157	0.0332775	5	8	0.407868	Ppup018600.1, Ppup027410.1, Ppup040760.1, Ppup048860.1, Ppup053540.1, Ppup063840.1, Ppup160440.1, Ppup174480.1
GO:0050896	BP	e	response to stimulus	502/2424	1952/10157	0.033458	1	502	0.409632	Ppup001720.1, Ppup002240.1, Ppup002480.1, Ppup002900.1, Ppup003740.1, Ppup003830.1, Ppup003910.1, Ppup004140.1, Ppup004150.1, Ppup004410.1, Ppup004450.1, Ppup005250.1, Ppup005470.1, Ppup005600.1, Ppup005940.1, Ppup006210.1, Ppup006830.1, Ppup006950.1, Ppup007300.1, Ppup008030.1, Ppup008570.1, Ppup008760.1, Ppup009230.1, Ppup009340.1, Ppup009440.1, Ppup009730.1, Ppup009830.1, Ppup009850.1, Ppup010…
GO:1902652	BP	e	secondary alcohol metabolic process	22/2424	61/10157	0.033702	5	22	0.411717	Ppup005600.1, Ppup010210.1, Ppup039320.1, Ppup043200.1, Ppup047250.1, Ppup060140.1, Ppup063000.1, Ppup075190.1, Ppup075690.1, Ppup101160.1, Ppup104600.1, Ppup108140.1, Ppup109420.1, Ppup109430.1, Ppup126800.1, Ppup137980.1, Ppup140310.1, Ppup162150.1, Ppup162270.1, Ppup165030.1, Ppup171790.1, Ppup175870.1
GO:0050821	BP	e	protein stabilization	22/2424	61/10157	0.033702	4	22	0.411717	Ppup001710.1, Ppup002890.1, Ppup003230.1, Ppup018070.1, Ppup018690.1, Ppup027280.1, Ppup037770.1, Ppup053850.1, Ppup077520.1, Ppup086130.1, Ppup092470.1, Ppup093660.1, Ppup095740.1, Ppup100660.1, Ppup101230.1, Ppup107840.1, Ppup110820.1, Ppup127830.1, Ppup136070.1, Ppup143120.1, Ppup145250.1, Ppup163840.1
GO:0048749	BP	e	compound eye development	15/2424	38/10157	0.0339716	6	15	0.414557	Ppup025760.1, Ppup058840.1, Ppup063470.1, Ppup071370.1, Ppup074880.1, Ppup085760.1, Ppup092260.1, Ppup095370.1, Ppup103620.1, Ppup104710.1, Ppup110290.1, Ppup119540.1, Ppup137460.1, Ppup151290.1, Ppup174910.1
GO:0044270	BP	e	cellular nitrogen compound catabolic process	56/2424	182/10157	0.0347416	4	56	0.422111	Ppup005210.1, Ppup014330.1, Ppup015760.1, Ppup019030.1, Ppup023010.1, Ppup025790.1, Ppup026790.1, Ppup027520.1, Ppup028780.1, Ppup031100.1, Ppup037010.1, Ppup040010.1, Ppup040060.1, Ppup043010.1, Ppup043390.1, Ppup043500.1, Ppup043550.1, Ppup045860.1, Ppup052580.1, Ppup062360.1, Ppup063920.1, Ppup064000.1, Ppup069530.1, Ppup081980.1, Ppup084440.1, Ppup084660.1, Ppup085930.1, Ppup094560.1, Ppup102…
GO:0048640	BP	e	negative regulation of developmental growth	17/2424	45/10157	0.034901	5	17	0.423587	Ppup024220.1, Ppup027410.1, Ppup027690.1, Ppup028360.1, Ppup035800.1, Ppup043150.1, Ppup059940.1, Ppup064250.1, Ppup071370.1, Ppup084450.1, Ppup101280.1, Ppup103750.1, Ppup109360.1, Ppup110950.1, Ppup120140.1, Ppup137460.1, Ppup174910.1
GO:0048010	BP	e	vascular endothelial growth factor receptor signaling pathway	9/2424	20/10157	0.0350428	8	9	0.423927	Ppup022170.1, Ppup077440.1, Ppup083740.1, Ppup114050.1, Ppup117200.1, Ppup125270.1, Ppup141550.1, Ppup145680.1, Ppup171780.1
GO:0060759	BP	e	regulation of response to cytokine stimulus	9/2424	20/10157	0.0350428	4	9	0.423927	Ppup012830.1, Ppup027520.1, Ppup040010.1, Ppup050170.1, Ppup054230.1, Ppup111590.1, Ppup112100.1, Ppup135100.1, Ppup162360.1
GO:0010324	BP	e	membrane invagination	9/2424	20/10157	0.0350428	5	9	0.423927	Ppup042150.1, Ppup063370.1, Ppup082620.1, Ppup105750.1, Ppup125270.1, Ppup130170.1, Ppup145680.1, Ppup145980.1, Ppup171780.1
GO:0060627	BP	e	regulation of vesicle-mediated transport	56/2424	183/10157	0.0354724	5	56	0.428304	Ppup003070.1, Ppup004180.1, Ppup006490.1, Ppup007130.1, Ppup007260.1, Ppup010280.1, Ppup010330.1, Ppup013930.1, Ppup017930.1, Ppup020290.1, Ppup020500.1, Ppup020690.1, Ppup021570.1, Ppup027200.1, Ppup029460.1, Ppup031510.1, Ppup031560.1, Ppup040410.1, Ppup052260.1, Ppup057910.1, Ppup062660.1, Ppup070550.1, Ppup075410.1, Ppup082200.1, Ppup082620.1, Ppup087090.1, Ppup092470.1, Ppup093070.1, Ppup093…
GO:0044057	BP	e	regulation of system process	37/2424	114/10157	0.0354813	4	37	0.428304	Ppup003230.1, Ppup004150.1, Ppup005470.1, Ppup010280.1, Ppup011220.1, Ppup020520.1, Ppup020690.1, Ppup026440.1, Ppup026990.1, Ppup035800.1, Ppup049000.1, Ppup050410.1, Ppup050970.1, Ppup052260.1, Ppup062600.1, Ppup081850.1, Ppup082790.1, Ppup086710.1, Ppup086960.1, Ppup094070.1, Ppup096760.1, Ppup098040.1, Ppup099860.1, Ppup110970.1, Ppup111520.1, Ppup114530.1, Ppup122670.1, Ppup123810.1, Ppup134…
GO:0099003	BP	e	vesicle-mediated transport in synapse	20/2424	54/10157	0.0356785	5	20	0.43022	Ppup004540.1, Ppup006440.1, Ppup008830.1, Ppup010280.1, Ppup010330.1, Ppup012590.1, Ppup027680.1, Ppup052260.1, Ppup056640.1, Ppup075410.1, Ppup076850.1, Ppup085760.1, Ppup094800.1, Ppup106330.1, Ppup106480.1, Ppup112480.1, Ppup113230.1, Ppup135110.1, Ppup150900.1, Ppup153880.1
GO:0042632	BP	e	cholesterol homeostasis	13/2424	32/10157	0.035845	7	13	0.431763	Ppup043200.1, Ppup046770.1, Ppup047250.1, Ppup060140.1, Ppup075190.1, Ppup104600.1, Ppup106100.1, Ppup109420.1, Ppup109430.1, Ppup120280.1, Ppup130100.1, Ppup162270.1, Ppup165030.1
GO:0006812	BP	e	cation transport	85/2424	291/10157	0.036043	5	85	0.43368	Ppup003040.1, Ppup004080.1, Ppup004420.1, Ppup005470.1, Ppup006500.1, Ppup007780.1, Ppup011220.1, Ppup017880.1, Ppup018310.1, Ppup020100.1, Ppup020860.1, Ppup021490.1, Ppup027280.1, Ppup029430.1, Ppup031510.1, Ppup031630.1, Ppup052420.1, Ppup057970.1, Ppup059950.1, Ppup060330.1, Ppup063560.1, Ppup063970.1, Ppup065840.1, Ppup075450.1, Ppup075540.1, Ppup077470.1, Ppup085610.1, Ppup086960.1, Ppup090…
GO:0050778	BP	e	positive regulation of immune response	41/2424	128/10157	0.0362947	5	41	0.436239	Ppup008760.1, Ppup020500.1, Ppup026660.1, Ppup026790.1, Ppup027200.1, Ppup027500.1, Ppup030870.1, Ppup036280.1, Ppup037880.1, Ppup048850.1, Ppup050170.1, Ppup053150.1, Ppup053970.1, Ppup058040.1, Ppup075330.1, Ppup075380.1, Ppup075580.1, Ppup077400.1, Ppup082030.1, Ppup090900.1, Ppup093050.1, Ppup095370.1, Ppup103750.1, Ppup106080.1, Ppup106190.1, Ppup109060.1, Ppup112100.1, Ppup114980.1, Ppup114…
GO:0060828	BP	e	regulation of canonical Wnt signaling pathway	28/2424	82/10157	0.0365062	7	28	0.437757	Ppup001710.1, Ppup005490.1, Ppup007690.1, Ppup008760.1, Ppup010900.1, Ppup011100.1, Ppup024370.1, Ppup026960.1, Ppup030870.1, Ppup037330.1, Ppup087280.1, Ppup095620.1, Ppup095740.1, Ppup096450.1, Ppup105580.1, Ppup110290.1, Ppup111950.1, Ppup114980.1, Ppup114990.1, Ppup115380.1, Ppup122670.1, Ppup123220.1, Ppup124080.1, Ppup126130.1, Ppup127660.1, Ppup127810.1, Ppup162360.1, Ppup164060.1
GO:0099175	BP	e	regulation of postsynapse organization	11/2424	26/10157	0.0365385	6	11	0.437757	Ppup004410.1, Ppup011620.1, Ppup050970.1, Ppup052710.1, Ppup075890.1, Ppup086420.1, Ppup098040.1, Ppup103510.1, Ppup124670.1, Ppup137540.1, Ppup145860.1
GO:2000756	BP	e	regulation of peptidyl-lysine acetylation	11/2424	26/10157	0.0365385	9	11	0.437757	Ppup005470.1, Ppup033420.1, Ppup035070.1, Ppup042410.1, Ppup043580.1, Ppup057830.1, Ppup075380.1, Ppup080180.1, Ppup122630.1, Ppup140050.1, Ppup171790.1
GO:0016570	BP	e	histone modification	66/2424	220/10157	0.0372518	7	66	0.44543	Ppup001800.1, Ppup003120.1, Ppup003620.1, Ppup005470.1, Ppup008730.1, Ppup012980.1, Ppup013200.1, Ppup014100.1, Ppup018690.1, Ppup018870.1, Ppup019150.1, Ppup019460.1, Ppup019810.1, Ppup019950.1, Ppup021480.1, Ppup022280.1, Ppup025910.1, Ppup028340.1, Ppup028770.1, Ppup034100.1, Ppup035890.1, Ppup035940.1, Ppup039050.1, Ppup039790.1, Ppup039960.1, Ppup042410.1, Ppup043580.1, Ppup043600.1, Ppup046…
GO:0006082	BP	e	organic acid metabolic process	141/2424	508/10157	0.0372587	3	141	0.44543	Ppup001760.1, Ppup001870.1, Ppup002290.1, Ppup003130.1, Ppup003740.1, Ppup005460.1, Ppup005600.1, Ppup006190.1, Ppup006550.1, Ppup009640.1, Ppup009900.1, Ppup010470.1, Ppup011120.1, Ppup019840.1, Ppup022030.1, Ppup024400.1, Ppup025130.1, Ppup025770.1, Ppup025880.1, Ppup026550.1, Ppup027910.1, Ppup027920.1, Ppup027930.1, Ppup028780.1, Ppup029370.1, Ppup031730.1, Ppup037550.1, Ppup037640.1, Ppup039…
GO:0030154	BP	e	cell differentiation	135/2424	484/10157	0.0377135	3	135	0.450387	Ppup001710.1, Ppup003100.1, Ppup003170.1, Ppup003910.1, Ppup006950.1, Ppup011180.1, Ppup011560.1, Ppup014060.1, Ppup014270.1, Ppup014360.1, Ppup018890.1, Ppup019930.1, Ppup021490.1, Ppup025880.1, Ppup026790.1, Ppup027270.1, Ppup027280.1, Ppup027410.1, Ppup028360.1, Ppup035330.1, Ppup035800.1, Ppup035890.1, Ppup036080.1, Ppup036980.1, Ppup037010.1, Ppup037560.1, Ppup037640.1, Ppup039960.1, Ppup043…
GO:0006665	BP	e	sphingolipid metabolic process	20/2424	55/10157	0.0380261	6	20	0.453152	Ppup001870.1, Ppup004080.1, Ppup005460.1, Ppup029370.1, Ppup071410.1, Ppup086980.1, Ppup090400.1, Ppup098060.1, Ppup107050.1, Ppup110130.1, Ppup122120.1, Ppup127200.1, Ppup127210.1, Ppup138760.1, Ppup140050.1, Ppup140310.1, Ppup149640.1, Ppup160900.1, Ppup171800.1, Ppup173320.1
GO:0016049	BP	e	cell growth	20/2424	55/10157	0.0380261	2	20	0.453152	Ppup003910.1, Ppup006950.1, Ppup022170.1, Ppup028600.1, Ppup030870.1, Ppup031080.1, Ppup045860.1, Ppup058400.1, Ppup073000.1, Ppup077470.1, Ppup087330.1, Ppup103700.1, Ppup105740.1, Ppup110950.1, Ppup123780.1, Ppup143690.1, Ppup144230.1, Ppup145680.1, Ppup152740.1, Ppup166580.1
GO:0045926	BP	e	negative regulation of growth	28/2424	83/10157	0.0385992	4	28	0.459002	Ppup024220.1, Ppup024270.1, Ppup027410.1, Ppup027690.1, Ppup028360.1, Ppup030870.1, Ppup035800.1, Ppup043150.1, Ppup057830.1, Ppup059940.1, Ppup064250.1, Ppup071370.1, Ppup075920.1, Ppup084450.1, Ppup095780.1, Ppup101280.1, Ppup103750.1, Ppup109360.1, Ppup110950.1, Ppup120140.1, Ppup125780.1, Ppup134150.1, Ppup134310.1, Ppup137460.1, Ppup140050.1, Ppup141010.1, Ppup174910.1, Ppup175870.1
GO:0006475	BP	e	internal protein amino acid acetylation	28/2424	83/10157	0.0385992	9	28	0.459002	Ppup005470.1, Ppup008730.1, Ppup012980.1, Ppup014100.1, Ppup018690.1, Ppup019150.1, Ppup019460.1, Ppup019950.1, Ppup021480.1, Ppup022280.1, Ppup025950.1, Ppup028770.1, Ppup037550.1, Ppup042410.1, Ppup043580.1, Ppup043600.1, Ppup050210.1, Ppup075420.1, Ppup084990.1, Ppup094820.1, Ppup101170.1, Ppup105670.1, Ppup127650.1, Ppup127830.1, Ppup140050.1, Ppup167520.1, Ppup174340.1, Ppup176270.1
GO:0061024	BP	e	membrane organization	76/2424	259/10157	0.0387185	4	76	0.459931	Ppup003070.1, Ppup003230.1, Ppup004180.1, Ppup005470.1, Ppup006440.1, Ppup007170.1, Ppup009190.1, Ppup009830.1, Ppup010280.1, Ppup011120.1, Ppup012590.1, Ppup013930.1, Ppup018600.1, Ppup021570.1, Ppup021890.1, Ppup028300.1, Ppup029460.1, Ppup031510.1, Ppup035750.1, Ppup037910.1, Ppup042150.1, Ppup043530.1, Ppup046930.1, Ppup048860.1, Ppup052530.1, Ppup053540.1, Ppup054430.1, Ppup057910.1, Ppup057…
GO:0080135	BP	e	regulation of cellular response to stress	67/2424	225/10157	0.0395848	5	67	0.462096	Ppup001720.1, Ppup003100.1, Ppup005470.1, Ppup008700.1, Ppup009230.1, Ppup017410.1, Ppup020080.1, Ppup021150.1, Ppup022170.1, Ppup024570.1, Ppup026960.1, Ppup027280.1, Ppup027490.1, Ppup028810.1, Ppup035940.1, Ppup037010.1, Ppup037560.1, Ppup038210.1, Ppup043150.1, Ppup049390.1, Ppup054230.1, Ppup056150.1, Ppup075720.1, Ppup076270.1, Ppup076280.1, Ppup076390.1, Ppup081980.1, Ppup084440.1, Ppup085…
GO:0006643	BP	e	membrane lipid metabolic process	32/2424	96/10157	0.0398592	5	32	0.462096	Ppup001870.1, Ppup003590.1, Ppup004080.1, Ppup005460.1, Ppup018240.1, Ppup026430.1, Ppup027260.1, Ppup029370.1, Ppup040690.1, Ppup070660.1, Ppup071410.1, Ppup086980.1, Ppup090400.1, Ppup098060.1, Ppup101150.1, Ppup107050.1, Ppup110130.1, Ppup122120.1, Ppup123980.1, Ppup126400.1, Ppup127200.1, Ppup127210.1, Ppup138760.1, Ppup140050.1, Ppup140310.1, Ppup141050.1, Ppup147120.1, Ppup149640.1, Ppup160…
GO:0022414	BP	e	reproductive process	229/2424	856/10157	0.0400809	1	229	0.462096	Ppup001870.1, Ppup004410.1, Ppup007260.1, Ppup008020.1, Ppup008030.1, Ppup008570.1, Ppup008680.1, Ppup011200.1, Ppup015880.1, Ppup015890.1, Ppup017930.1, Ppup017950.1, Ppup018070.1, Ppup018590.1, Ppup018600.1, Ppup018870.1, Ppup019930.1, Ppup021180.1, Ppup021200.1, Ppup021210.1, Ppup021300.1, Ppup021490.1, Ppup021950.1, Ppup022030.1, Ppup022170.1, Ppup022280.1, Ppup023070.1, Ppup024270.1, Ppup026…
GO:0007442	BP	e	hindgut morphogenesis	5/2424	9/10157	0.0405476	3	5	0.462096	Ppup027500.1, Ppup058840.1, Ppup077400.1, Ppup092910.1, Ppup169510.1
GO:1901224	BP	e	positive regulation of NIK/NF-kappaB signaling	5/2424	9/10157	0.0405476	8	5	0.462096	Ppup019150.1, Ppup019460.1, Ppup026790.1, Ppup027200.1, Ppup038890.1
GO:0010216	BP	e	maintenance of DNA methylation	5/2424	9/10157	0.0405476	7	5	0.462096	Ppup016230.1, Ppup033420.1, Ppup039050.1, Ppup145760.1, Ppup147030.1
GO:0009826	BP	e	unidimensional cell growth	5/2424	9/10157	0.0405476	4	5	0.462096	Ppup003910.1, Ppup058400.1, Ppup087330.1, Ppup123780.1, Ppup152740.1
GO:0110116	BP	e	regulation of compound eye photoreceptor cell differentiation	5/2424	9/10157	0.0405476	9	5	0.462096	Ppup017950.1, Ppup101280.1, Ppup137670.1, Ppup142580.1, Ppup174910.1
GO:0001672	BP	e	regulation of chromatin assembly or disassembly	5/2424	9/10157	0.0405476	8	5	0.462096	Ppup011260.1, Ppup058840.1, Ppup103700.1, Ppup112530.1, Ppup174120.1
GO:0043550	BP	e	regulation of lipid kinase activity	5/2424	9/10157	0.0405476	9	5	0.462096	Ppup003100.1, Ppup019820.1, Ppup077440.1, Ppup099800.1, Ppup126550.1
GO:0007303	BP	e	cytoplasmic transport, nurse cell to oocyte	5/2424	9/10157	0.0405476	6	5	0.462096	Ppup071370.1, Ppup139640.1, Ppup140190.1, Ppup160910.1, Ppup174280.1
GO:0010885	BP	e	regulation of cholesterol storage	5/2424	9/10157	0.0405476	6	5	0.462096	Ppup047250.1, Ppup060140.1, Ppup104600.1, Ppup120280.1, Ppup162270.1
GO:0046341	BP	e	CDP-diacylglycerol metabolic process	5/2424	9/10157	0.0405476	9	5	0.462096	Ppup040660.1, Ppup092170.1, Ppup135100.1, Ppup153110.1, Ppup167390.1
GO:2000463	BP	e	positive regulation of excitatory postsynaptic potential	5/2424	9/10157	0.0405476	8	5	0.462096	Ppup004150.1, Ppup010280.1, Ppup052260.1, Ppup098040.1, Ppup145860.1
GO:2001038	BP	e	regulation of cellular response to drug	5/2424	9/10157	0.0405476	5	5	0.462096	Ppup001800.1, Ppup027490.1, Ppup084440.1, Ppup124080.1, Ppup173320.1
GO:0008103	BP	e	oocyte microtubule cytoskeleton polarization	5/2424	9/10157	0.0405476	3	5	0.462096	Ppup037540.1, Ppup052220.1, Ppup091240.1, Ppup140190.1, Ppup157110.1
GO:1900024	BP	e	regulation of substrate adhesion-dependent cell spreading	5/2424	9/10157	0.0405476	7	5	0.462096	Ppup005490.1, Ppup042910.1, Ppup083090.1, Ppup086470.1, Ppup125270.1
GO:0044257	BP	e	cellular protein catabolic process	5/2424	9/10157	0.0405476	6	5	0.462096	Ppup002900.1, Ppup046850.1, Ppup063940.1, Ppup093660.1, Ppup101240.1
GO:0090110	BP	e	COPII-coated vesicle cargo loading	5/2424	9/10157	0.0405476	5	5	0.462096	Ppup007260.1, Ppup021890.1, Ppup086720.1, Ppup126930.1, Ppup146870.1
GO:0007317	BP	e	regulation of pole plasm oskar mRNA localization	5/2424	9/10157	0.0405476	8	5	0.462096	Ppup004180.1, Ppup113230.1, Ppup135280.1, Ppup140190.1, Ppup157110.1
GO:0043534	BP	e	blood vessel endothelial cell migration	5/2424	9/10157	0.0405476	8	5	0.462096	Ppup003170.1, Ppup047250.1, Ppup060140.1, Ppup115290.1, Ppup162270.1
GO:0043052	BP	e	thermotaxis	5/2424	9/10157	0.0405476	4	5	0.462096	Ppup004450.1, Ppup040660.1, Ppup062660.1, Ppup065920.1, Ppup139870.1
GO:0150116	BP	e	regulation of cell-substrate junction organization	8/2424	17/10157	0.0405601	5	8	0.462096	Ppup003910.1, Ppup027280.1, Ppup057310.1, Ppup084230.1, Ppup086470.1, Ppup116890.1, Ppup122670.1, Ppup146370.1
GO:0070509	BP	e	calcium ion import	8/2424	17/10157	0.0405601	9	8	0.462096	Ppup005470.1, Ppup006500.1, Ppup011220.1, Ppup077470.1, Ppup099860.1, Ppup127980.1, Ppup135080.1, Ppup171640.1
GO:0051893	BP	e	regulation of focal adhesion assembly	8/2424	17/10157	0.0405601	7	8	0.462096	Ppup003910.1, Ppup027280.1, Ppup057310.1, Ppup084230.1, Ppup086470.1, Ppup116890.1, Ppup122670.1, Ppup146370.1
GO:0060811	BP	e	intracellular mRNA localization involved in anterior/posterior axis specification	8/2424	17/10157	0.0405601	6	8	0.462096	Ppup018070.1, Ppup027410.1, Ppup052220.1, Ppup085930.1, Ppup123910.1, Ppup140100.1, Ppup140190.1, Ppup168280.1
GO:0050870	BP	e	positive regulation of T cell activation	8/2424	17/10157	0.0405601	8	8	0.462096	Ppup037880.1, Ppup048850.1, Ppup058040.1, Ppup069210.1, Ppup069390.1, Ppup109060.1, Ppup153110.1, Ppup162360.1
GO:0090109	BP	e	regulation of cell-substrate junction assembly	8/2424	17/10157	0.0405601	6	8	0.462096	Ppup003910.1, Ppup027280.1, Ppup057310.1, Ppup084230.1, Ppup086470.1, Ppup116890.1, Ppup122670.1, Ppup146370.1
GO:0031111	BP	e	negative regulation of microtubule polymerization or depolymerization	8/2424	17/10157	0.0405601	9	8	0.462096	Ppup009190.1, Ppup025690.1, Ppup043440.1, Ppup077190.1, Ppup080260.1, Ppup087280.1, Ppup106040.1, Ppup114260.1
GO:0045321	BP	e	leukocyte activation	32/2424	97/10157	0.0412727	3	32	0.462096	Ppup001870.1, Ppup009680.1, Ppup011180.1, Ppup026790.1, Ppup027280.1, Ppup043610.1, Ppup053510.1, Ppup054230.1, Ppup061660.1, Ppup082130.1, Ppup082260.1, Ppup086420.1, Ppup091630.1, Ppup091760.1, Ppup102180.1, Ppup105750.1, Ppup116770.1, Ppup122120.1, Ppup122580.1, Ppup124670.1, Ppup130170.1, Ppup133840.1, Ppup141910.1, Ppup144880.1, Ppup146820.1, Ppup149470.1, Ppup152050.1, Ppup166870.1, Ppup171…
GO:0070646	BP	e	protein modification by small protein removal	32/2424	97/10157	0.0412727	8	32	0.462096	Ppup001710.1, Ppup010900.1, Ppup018690.1, Ppup019430.1, Ppup021280.1, Ppup021570.1, Ppup026220.1, Ppup031610.1, Ppup035800.1, Ppup037770.1, Ppup041460.1, Ppup043560.1, Ppup043580.1, Ppup074960.1, Ppup082560.1, Ppup086460.1, Ppup087280.1, Ppup094610.1, Ppup113360.1, Ppup114460.1, Ppup114980.1, Ppup114990.1, Ppup122870.1, Ppup123220.1, Ppup127040.1, Ppup128890.1, Ppup140010.1, Ppup140070.1, Ppup141…
GO:0001666	BP	e	response to hypoxia	20/2424	56/10157	0.0414847	5	20	0.462096	Ppup009230.1, Ppup009340.1, Ppup017950.1, Ppup037880.1, Ppup043150.1, Ppup047070.1, Ppup048420.1, Ppup052760.1, Ppup054410.1, Ppup065950.1, Ppup081850.1, Ppup101240.1, Ppup122830.1, Ppup124080.1, Ppup126660.1, Ppup137540.1, Ppup141850.1, Ppup144410.1, Ppup156210.1, Ppup165090.1
GO:0002696	BP	e	positive regulation of leukocyte activation	13/2424	33/10157	0.0418053	6	13	0.462096	Ppup020500.1, Ppup037880.1, Ppup048850.1, Ppup058040.1, Ppup066020.1, Ppup069210.1, Ppup069390.1, Ppup109060.1, Ppup123820.1, Ppup140050.1, Ppup153110.1, Ppup162360.1, Ppup172340.1
GO:0071241	BP	e	cellular response to inorganic substance	23/2424	66/10157	0.0421372	4	23	0.462096	Ppup004140.1, Ppup009830.1, Ppup018270.1, Ppup021150.1, Ppup061580.1, Ppup082130.1, Ppup093110.1, Ppup093120.1, Ppup101240.1, Ppup113230.1, Ppup125780.1, Ppup133960.1, Ppup139870.1, Ppup143800.1, Ppup144610.1, Ppup145680.1, Ppup146980.1, Ppup147380.1, Ppup151000.1, Ppup151110.1, Ppup152000.1, Ppup165290.1, Ppup171790.1
GO:1901293	BP	e	nucleoside phosphate biosynthetic process	43/2424	136/10157	0.0421399	7	43	0.462096	Ppup001740.1, Ppup003740.1, Ppup004480.1, Ppup005850.1, Ppup009850.1, Ppup011470.1, Ppup016890.1, Ppup040660.1, Ppup045850.1, Ppup046280.1, Ppup050190.1, Ppup052580.1, Ppup052600.1, Ppup071520.1, Ppup075400.1, Ppup075450.1, Ppup083660.1, Ppup090400.1, Ppup092170.1, Ppup093290.1, Ppup093570.1, Ppup095050.1, Ppup095440.1, Ppup105390.1, Ppup106400.1, Ppup115240.1, Ppup122750.1, Ppup122800.1, Ppup124…
GO:0043269	BP	e	regulation of ion transport	51/2424	166/10157	0.0430101	5	51	0.462096	Ppup002250.1, Ppup003230.1, Ppup004150.1, Ppup005470.1, Ppup009830.1, Ppup010280.1, Ppup011220.1, Ppup017930.1, Ppup020860.1, Ppup022290.1, Ppup026440.1, Ppup026990.1, Ppup027810.1, Ppup031750.1, Ppup037900.1, Ppup038960.1, Ppup063560.1, Ppup064610.1, Ppup069270.1, Ppup071180.1, Ppup075540.1, Ppup082260.1, Ppup084230.1, Ppup090810.1, Ppup092830.1, Ppup094070.1, Ppup095530.1, Ppup097670.1, Ppup098…
GO:0009108	BP	e	coenzyme biosynthetic process	29/2424	87/10157	0.0430316	5	29	0.462096	Ppup004480.1, Ppup009850.1, Ppup011470.1, Ppup016890.1, Ppup035830.1, Ppup045850.1, Ppup052580.1, Ppup058980.1, Ppup061710.1, Ppup063190.1, Ppup083660.1, Ppup090400.1, Ppup095050.1, Ppup095440.1, Ppup096950.1, Ppup109000.1, Ppup115360.1, Ppup124720.1, Ppup131510.1, Ppup134900.1, Ppup137390.1, Ppup137610.1, Ppup141310.1, Ppup144990.1, Ppup146310.1, Ppup151070.1, Ppup157140.1, Ppup164350.1, Ppup168…
GO:0051347	BP	e	positive regulation of transferase activity	43/2424	137/10157	0.0432426	5	43	0.462096	Ppup013130.1, Ppup013200.1, Ppup015730.1, Ppup018680.1, Ppup022170.1, Ppup027810.1, Ppup028810.1, Ppup030870.1, Ppup035940.1, Ppup036080.1, Ppup040150.1, Ppup044130.1, Ppup044250.1, Ppup053660.1, Ppup059860.1, Ppup062600.1, Ppup075760.1, Ppup075960.1, Ppup077440.1, Ppup079510.1, Ppup082970.1, Ppup090640.1, Ppup090980.1, Ppup095470.1, Ppup101280.1, Ppup104490.1, Ppup115100.1, Ppup115380.1, Ppup117…
GO:0051726	BP	e	regulation of cell cycle	121/2424	432/10157	0.0433596	4	121	0.462096	Ppup001720.1, Ppup001800.1, Ppup003100.1, Ppup005470.1, Ppup006720.1, Ppup008760.1, Ppup010940.1, Ppup015890.1, Ppup018270.1, Ppup018510.1, Ppup018600.1, Ppup018680.1, Ppup018690.1, Ppup019150.1, Ppup019460.1, Ppup020590.1, Ppup021180.1, Ppup021300.1, Ppup022280.1, Ppup023070.1, Ppup024570.1, Ppup025490.1, Ppup025910.1, Ppup026960.1, Ppup027280.1, Ppup027520.1, Ppup028340.1, Ppup028810.1, Ppup029…
GO:0051094	BP	e	positive regulation of developmental process	108/2424	382/10157	0.0433622	4	108	0.462096	Ppup001800.1, Ppup002890.1, Ppup003170.1, Ppup006950.1, Ppup008680.1, Ppup010280.1, Ppup018680.1, Ppup018760.1, Ppup019930.1, Ppup024220.1, Ppup024560.1, Ppup024570.1, Ppup025100.1, Ppup026960.1, Ppup027050.1, Ppup030870.1, Ppup036080.1, Ppup037560.1, Ppup037880.1, Ppup039090.1, Ppup040580.1, Ppup040760.1, Ppup042910.1, Ppup043580.1, Ppup046770.1, Ppup048090.1, Ppup048850.1, Ppup048860.1, Ppup050…
GO:0009887	BP	e	animal organ morphogenesis	74/2424	253/10157	0.0439	3	74	0.462096	Ppup005470.1, Ppup007460.1, Ppup007690.1, Ppup008020.1, Ppup009270.1, Ppup018600.1, Ppup018630.1, Ppup019930.1, Ppup021200.1, Ppup021490.1, Ppup025490.1, Ppup025700.1, Ppup026660.1, Ppup027050.1, Ppup027410.1, Ppup031700.1, Ppup035600.1, Ppup035800.1, Ppup036920.1, Ppup037560.1, Ppup039090.1, Ppup042450.1, Ppup043550.1, Ppup045470.1, Ppup049390.1, Ppup052220.1, Ppup058800.1, Ppup058840.1, Ppup061…
GO:1902036	BP	e	regulation of hematopoietic stem cell differentiation	6/2424	12/10157	0.0441021	7	6	0.462096	Ppup037880.1, Ppup040010.1, Ppup066020.1, Ppup101150.1, Ppup114980.1, Ppup114990.1
GO:0051693	BP	e	actin filament capping	6/2424	12/10157	0.0441021	12	6	0.462096	Ppup009190.1, Ppup064390.1, Ppup114260.1, Ppup126790.1, Ppup142060.1, Ppup150900.1
GO:0061157	BP	e	mRNA destabilization	6/2424	12/10157	0.0441021	10	6	0.462096	Ppup026790.1, Ppup040010.1, Ppup084660.1, Ppup086780.1, Ppup139800.1, Ppup173830.1
GO:0007291	BP	e	sperm individualization	6/2424	12/10157	0.0441021	4	6	0.462096	Ppup027050.1, Ppup027410.1, Ppup037910.1, Ppup040660.1, Ppup130400.1, Ppup135110.1
GO:0035308	BP	e	negative regulation of protein dephosphorylation	6/2424	12/10157	0.0441021	9	6	0.462096	Ppup041140.1, Ppup053660.1, Ppup101030.1, Ppup112100.1, Ppup121540.1, Ppup149470.1
GO:0045582	BP	e	positive regulation of T cell differentiation	6/2424	12/10157	0.0441021	9	6	0.462096	Ppup037880.1, Ppup048850.1, Ppup069210.1, Ppup069390.1, Ppup109060.1, Ppup162360.1
GO:0007519	BP	e	skeletal muscle tissue development	6/2424	12/10157	0.0441021	6	6	0.462096	Ppup018590.1, Ppup022260.1, Ppup043550.1, Ppup043740.1, Ppup054060.1, Ppup124100.1
GO:0043090	BP	e	amino acid import	6/2424	12/10157	0.0441021	9	6	0.462096	Ppup004420.1, Ppup085610.1, Ppup086080.1, Ppup106580.1, Ppup153300.1, Ppup154630.1
GO:0060281	BP	e	regulation of oocyte development	6/2424	12/10157	0.0441021	7	6	0.462096	Ppup004180.1, Ppup040010.1, Ppup113230.1, Ppup135280.1, Ppup140190.1, Ppup157110.1
GO:0007112	BP	e	male meiosis cytokinesis	6/2424	12/10157	0.0441021	6	6	0.462096	Ppup018600.1, Ppup027410.1, Ppup053540.1, Ppup063840.1, Ppup160440.1, Ppup174480.1
GO:0009629	BP	e	response to gravity	6/2424	12/10157	0.0441021	3	6	0.462096	Ppup031700.1, Ppup086960.1, Ppup094290.1, Ppup109360.1, Ppup146090.1, Ppup160840.1
GO:1900073	BP	e	regulation of neuromuscular synaptic transmission	6/2424	12/10157	0.0441021	7	6	0.462096	Ppup010330.1, Ppup113230.1, Ppup120140.1, Ppup130150.1, Ppup139870.1, Ppup174280.1
GO:0014019	BP	e	neuroblast development	6/2424	12/10157	0.0441021	5	6	0.462096	Ppup011560.1, Ppup120090.1, Ppup123780.1, Ppup130440.1, Ppup152740.1, Ppup169510.1
GO:0007254	BP	e	JNK cascade	6/2424	12/10157	0.0441021	11	6	0.462096	Ppup035940.1, Ppup086990.1, Ppup107050.1, Ppup115100.1, Ppup134990.1, Ppup145680.1
GO:0072511	BP	e	divalent inorganic cation transport	26/2424	77/10157	0.0445411	6	26	0.462096	Ppup005470.1, Ppup006500.1, Ppup011220.1, Ppup017880.1, Ppup021490.1, Ppup059950.1, Ppup060330.1, Ppup075540.1, Ppup077470.1, Ppup086960.1, Ppup094310.1, Ppup094510.1, Ppup097670.1, Ppup099860.1, Ppup103150.1, Ppup106520.1, Ppup109830.1, Ppup109840.1, Ppup126020.1, Ppup127980.1, Ppup130150.1, Ppup135080.1, Ppup141800.1, Ppup149470.1, Ppup154520.1, Ppup171640.1
GO:0070838	BP	e	divalent metal ion transport	26/2424	77/10157	0.0445411	7	26	0.462096	Ppup005470.1, Ppup006500.1, Ppup011220.1, Ppup017880.1, Ppup021490.1, Ppup059950.1, Ppup060330.1, Ppup075540.1, Ppup077470.1, Ppup086960.1, Ppup094310.1, Ppup094510.1, Ppup097670.1, Ppup099860.1, Ppup103150.1, Ppup106520.1, Ppup109830.1, Ppup109840.1, Ppup126020.1, Ppup127980.1, Ppup130150.1, Ppup135080.1, Ppup141800.1, Ppup149470.1, Ppup154520.1, Ppup171640.1
GO:0030521	BP	e	androgen receptor signaling pathway	3/2424	4/10157	0.0446056	8	3	0.462096	Ppup004410.1, Ppup037010.1, Ppup139070.1
GO:0007300	BP	e	ovarian nurse cell to oocyte transport	3/2424	4/10157	0.0446056	4	3	0.462096	Ppup086990.1, Ppup101280.1, Ppup174280.1
GO:0007110	BP	e	meiosis I cytokinesis	3/2424	4/10157	0.0446056	6	3	0.462096	Ppup018600.1, Ppup048860.1, Ppup174480.1
GO:0055083	BP	e	monovalent inorganic anion homeostasis	3/2424	4/10157	0.0446056	7	3	0.462096	Ppup020100.1, Ppup025890.1, Ppup122620.1
GO:0097749	BP	e	membrane tubulation	3/2424	4/10157	0.0446056	5	3	0.462096	Ppup012590.1, Ppup028300.1, Ppup096440.1
GO:1900038	BP	e	negative regulation of cellular response to hypoxia	3/2424	4/10157	0.0446056	7	3	0.462096	Ppup009230.1, Ppup043150.1, Ppup176270.1
GO:0070508	BP	e	cholesterol import	3/2424	4/10157	0.0446056	8	3	0.462096	Ppup047250.1, Ppup060140.1, Ppup162270.1
GO:0036315	BP	e	cellular response to sterol	3/2424	4/10157	0.0446056	6	3	0.462096	Ppup031700.1, Ppup106100.1, Ppup146090.1
GO:1901623	BP	e	regulation of lymphocyte chemotaxis	3/2424	4/10157	0.0446056	9	3	0.462096	Ppup027810.1, Ppup086420.1, Ppup124670.1
GO:0070777	BP	e	D-aspartate transport	3/2424	4/10157	0.0446056	10	3	0.462096	Ppup085610.1, Ppup086080.1, Ppup106580.1
GO:0048268	BP	e	clathrin coat assembly	3/2424	4/10157	0.0446056	7	3	0.462096	Ppup003030.1, Ppup063370.1, Ppup092470.1
GO:0043029	BP	e	T cell homeostasis	3/2424	4/10157	0.0446056	7	3	0.462096	Ppup026790.1, Ppup061630.1, Ppup094310.1
GO:0097178	BP	e	ruffle assembly	3/2424	4/10157	0.0446056	7	3	0.462096	Ppup086470.1, Ppup094070.1, Ppup147010.1
GO:0098712	BP	e	L-glutamate import across plasma membrane	3/2424	4/10157	0.0446056	12	3	0.462096	Ppup085610.1, Ppup086080.1, Ppup106580.1
GO:0090178	BP	e	regulation of establishment of planar polarity involved in neural tube closure	3/2424	4/10157	0.0446056	7	3	0.462096	Ppup007690.1, Ppup095010.1, Ppup146870.1
GO:0032497	BP	e	detection of lipopolysaccharide	3/2424	4/10157	0.0446056	6	3	0.462096	Ppup047250.1, Ppup060140.1, Ppup162270.1
GO:0032729	BP	e	positive regulation of interferon-gamma production	3/2424	4/10157	0.0446056	6	3	0.462096	Ppup048850.1, Ppup058040.1, Ppup133840.1
GO:0050690	BP	e	regulation of defense response to virus by virus	3/2424	4/10157	0.0446056	4	3	0.462096	Ppup103710.1, Ppup120030.1, Ppup166870.1
GO:0048137	BP	e	spermatocyte division	3/2424	4/10157	0.0446056	3	3	0.462096	Ppup018600.1, Ppup154550.1, Ppup174480.1
GO:0005984	BP	e	disaccharide metabolic process	3/2424	4/10157	0.0446056	5	3	0.462096	Ppup050800.1, Ppup086230.1, Ppup125780.1
GO:0006002	BP	e	fructose 6-phosphate metabolic process	3/2424	4/10157	0.0446056	5	3	0.462096	Ppup125780.1, Ppup133900.1, Ppup162500.1
GO:0045820	BP	e	negative regulation of glycolytic process	3/2424	4/10157	0.0446056	10	3	0.462096	Ppup052760.1, Ppup125780.1, Ppup160690.1
GO:0035376	BP	e	sterol import	3/2424	4/10157	0.0446056	7	3	0.462096	Ppup047250.1, Ppup060140.1, Ppup162270.1
GO:1902074	BP	e	response to salt	3/2424	4/10157	0.0446056	3	3	0.462096	Ppup071180.1, Ppup140860.1, Ppup143800.1
GO:0061085	BP	e	regulation of histone H3-K27 methylation	3/2424	4/10157	0.0446056	10	3	0.462096	Ppup049720.1, Ppup080180.1, Ppup176270.1
GO:0051043	BP	e	regulation of membrane protein ectodomain proteolysis	3/2424	4/10157	0.0446056	7	3	0.462096	Ppup057490.1, Ppup061620.1, Ppup099550.1
GO:0110117	BP	e	positive regulation of compound eye photoreceptor cell differentiation	3/2424	4/10157	0.0446056	10	3	0.462096	Ppup101280.1, Ppup142580.1, Ppup174910.1
GO:0032490	BP	e	detection of molecule of bacterial origin	3/2424	4/10157	0.0446056	5	3	0.462096	Ppup047250.1, Ppup060140.1, Ppup162270.1
GO:0045678	BP	e	positive regulation of R7 cell differentiation	3/2424	4/10157	0.0446056	11	3	0.462096	Ppup101280.1, Ppup142580.1, Ppup174910.1
GO:0043302	BP	e	positive regulation of leukocyte degranulation	3/2424	4/10157	0.0446056	10	3	0.462096	Ppup020500.1, Ppup140050.1, Ppup172340.1
GO:0045821	BP	e	positive regulation of glycolytic process	3/2424	4/10157	0.0446056	10	3	0.462096	Ppup123340.1, Ppup168410.1, Ppup171790.1
GO:0010899	BP	e	regulation of phosphatidylcholine catabolic process	3/2424	4/10157	0.0446056	9	3	0.462096	Ppup047250.1, Ppup060140.1, Ppup162270.1
GO:0030536	BP	e	larval feeding behavior	3/2424	4/10157	0.0446056	3	3	0.462096	Ppup094290.1, Ppup135110.1, Ppup160840.1
GO:0034384	BP	e	high-density lipoprotein particle clearance	3/2424	4/10157	0.0446056	3	3	0.462096	Ppup047250.1, Ppup060140.1, Ppup162270.1
GO:0008348	BP	e	negative regulation of antimicrobial humoral response	3/2424	4/10157	0.0446056	7	3	0.462096	Ppup052950.1, Ppup052960.1, Ppup075330.1
GO:0045725	BP	e	positive regulation of glycogen biosynthetic process	3/2424	4/10157	0.0446056	10	3	0.462096	Ppup103510.1, Ppup123340.1, Ppup145020.1
GO:0043654	BP	e	recognition of apoptotic cell	3/2424	4/10157	0.0446056	4	3	0.462096	Ppup047250.1, Ppup060140.1, Ppup162270.1
GO:0044060	BP	e	regulation of endocrine process	3/2424	4/10157	0.0446056	5	3	0.462096	Ppup062600.1, Ppup082790.1, Ppup146980.1
GO:0098887	BP	e	neurotransmitter receptor transport, endosome to postsynaptic membrane	3/2424	4/10157	0.0446056	11	3	0.462096	Ppup075410.1, Ppup106330.1, Ppup137460.1
GO:0099527	BP	e	postsynapse to nucleus signaling pathway	3/2424	4/10157	0.0446056	6	3	0.462096	Ppup064880.1, Ppup130860.1, Ppup134690.1
GO:0055093	BP	e	response to hyperoxia	3/2424	4/10157	0.0446056	5	3	0.462096	Ppup101240.1, Ppup126660.1, Ppup161610.1
GO:1905276	BP	e	regulation of epithelial tube formation	3/2424	4/10157	0.0446056	6	3	0.462096	Ppup007690.1, Ppup095010.1, Ppup146870.1
GO:0007301	BP	e	female germline ring canal formation	3/2424	4/10157	0.0446056	7	3	0.462096	Ppup086990.1, Ppup101280.1, Ppup139640.1
GO:0045167	BP	e	asymmetric protein localization involved in cell fate determination	3/2424	4/10157	0.0446056	4	3	0.462096	Ppup109360.1, Ppup120550.1, Ppup175640.1
GO:0006910	BP	e	phagocytosis, recognition	3/2424	4/10157	0.0446056	3	3	0.462096	Ppup047250.1, Ppup060140.1, Ppup162270.1
GO:0002921	BP	e	negative regulation of humoral immune response	3/2424	4/10157	0.0446056	6	3	0.462096	Ppup052950.1, Ppup052960.1, Ppup075330.1
GO:0008069	BP	e	dorsal/ventral axis specification, ovarian follicular epithelium	3/2424	4/10157	0.0446056	5	3	0.462096	Ppup085930.1, Ppup160910.1, Ppup168280.1
GO:0046529	BP	e	imaginal disc fusion, thorax closure	3/2424	4/10157	0.0446056	4	3	0.462096	Ppup145680.1, Ppup171780.1, Ppup174910.1
GO:0006707	BP	e	cholesterol catabolic process	3/2424	4/10157	0.0446056	7	3	0.462096	Ppup047250.1, Ppup060140.1, Ppup162270.1
GO:0015920	BP	e	lipopolysaccharide transport	3/2424	4/10157	0.0446056	6	3	0.462096	Ppup047250.1, Ppup060140.1, Ppup162270.1
GO:0010996	BP	e	response to auditory stimulus	3/2424	4/10157	0.0446056	4	3	0.462096	Ppup071180.1, Ppup115160.1, Ppup140860.1
GO:0006884	BP	e	cell volume homeostasis	3/2424	4/10157	0.0446056	6	3	0.462096	Ppup020100.1, Ppup098040.1, Ppup122620.1
GO:0070779	BP	e	D-aspartate import across plasma membrane	3/2424	4/10157	0.0446056	11	3	0.462096	Ppup085610.1, Ppup086080.1, Ppup106580.1
GO:0007318	BP	e	pole plasm protein localization	3/2424	4/10157	0.0446056	4	3	0.462096	Ppup049290.1, Ppup109360.1, Ppup137460.1
GO:0043951	BP	e	negative regulation of cAMP-mediated signaling	3/2424	4/10157	0.0446056	8	3	0.462096	Ppup005940.1, Ppup045860.1, Ppup123000.1
GO:0016127	BP	e	sterol catabolic process	3/2424	4/10157	0.0446056	6	3	0.462096	Ppup047250.1, Ppup060140.1, Ppup162270.1
GO:0035186	BP	e	syncytial blastoderm mitotic cell cycle	3/2424	4/10157	0.0446056	5	3	0.462096	Ppup039960.1, Ppup135110.1, Ppup169360.1
GO:0016125	BP	e	sterol metabolic process	21/2424	59/10157	0.0450441	5	21	0.465344	Ppup003830.1, Ppup010210.1, Ppup039320.1, Ppup043200.1, Ppup047250.1, Ppup060140.1, Ppup075190.1, Ppup075690.1, Ppup095540.1, Ppup101160.1, Ppup104600.1, Ppup108140.1, Ppup109420.1, Ppup109430.1, Ppup126800.1, Ppup137980.1, Ppup140310.1, Ppup162150.1, Ppup162270.1, Ppup165030.1, Ppup171790.1
GO:0030534	BP	e	adult behavior	33/2424	101/10157	0.0453689	2	33	0.468267	Ppup005470.1, Ppup010280.1, Ppup018600.1, Ppup021350.1, Ppup024570.1, Ppup027280.1, Ppup037560.1, Ppup040750.1, Ppup045860.1, Ppup059350.1, Ppup062660.1, Ppup074880.1, Ppup075690.1, Ppup077470.1, Ppup086080.1, Ppup095850.1, Ppup096260.1, Ppup098040.1, Ppup109360.1, Ppup114210.1, Ppup120140.1, Ppup130150.1, Ppup137940.1, Ppup138780.1, Ppup139640.1, Ppup139870.1, Ppup143520.1, Ppup144880.1, Ppup145…
GO:0051646	BP	e	mitochondrion localization	10/2424	23/10157	0.0454916	4	10	0.4691	Ppup006950.1, Ppup043580.1, Ppup075690.1, Ppup110920.1, Ppup112700.1, Ppup140190.1, Ppup144460.1, Ppup144560.1, Ppup146680.1, Ppup176270.1
GO:0031668	BP	e	cellular response to extracellular stimulus	30/2424	90/10157	0.0458193	4	30	0.470956	Ppup009730.1, Ppup012590.1, Ppup016190.1, Ppup021150.1, Ppup021300.1, Ppup027200.1, Ppup027280.1, Ppup028400.1, Ppup035420.1, Ppup058440.1, Ppup084770.1, Ppup086080.1, Ppup092000.1, Ppup094510.1, Ppup112480.1, Ppup116700.1, Ppup119520.1, Ppup122880.1, Ppup126550.1, Ppup133890.1, Ppup134150.1, Ppup138770.1, Ppup139120.1, Ppup140310.1, Ppup145020.1, Ppup149590.1, Ppup152000.1, Ppup161610.1, Ppup171…
GO:0051965	BP	e	positive regulation of synapse assembly	12/2424	29/10157	0.0459243	7	12	0.470956	Ppup008680.1, Ppup010280.1, Ppup039090.1, Ppup046770.1, Ppup048860.1, Ppup074880.1, Ppup090820.1, Ppup103270.1, Ppup109360.1, Ppup120140.1, Ppup126170.1, Ppup168760.1
GO:0046626	BP	e	regulation of insulin receptor signaling pathway	12/2424	29/10157	0.0459243	6	12	0.470956	Ppup005490.1, Ppup005940.1, Ppup009730.1, Ppup024220.1, Ppup027280.1, Ppup046070.1, Ppup062600.1, Ppup075760.1, Ppup094070.1, Ppup103510.1, Ppup103750.1, Ppup176270.1
GO:0010906	BP	e	regulation of glucose metabolic process	12/2424	29/10157	0.0459243	7	12	0.470956	Ppup005470.1, Ppup026550.1, Ppup075960.1, Ppup094070.1, Ppup095640.1, Ppup103510.1, Ppup123340.1, Ppup125780.1, Ppup144280.1, Ppup145020.1, Ppup152710.1, Ppup176270.1
GO:1900076	BP	e	regulation of cellular response to insulin stimulus	12/2424	29/10157	0.0459243	4	12	0.470956	Ppup005490.1, Ppup005940.1, Ppup009730.1, Ppup024220.1, Ppup027280.1, Ppup046070.1, Ppup062600.1, Ppup075760.1, Ppup094070.1, Ppup103510.1, Ppup103750.1, Ppup176270.1
GO:0016319	BP	e	mushroom body development	12/2424	29/10157	0.0459243	3	12	0.470956	Ppup011200.1, Ppup011560.1, Ppup065930.1, Ppup084350.1, Ppup092540.1, Ppup101280.1, Ppup115500.1, Ppup145680.1, Ppup150610.1, Ppup150900.1, Ppup165510.1, Ppup166580.1
GO:0016569	BP	e	covalent chromatin modification	66/2424	222/10157	0.0461629	5	66	0.472969	Ppup001800.1, Ppup003120.1, Ppup003620.1, Ppup005470.1, Ppup008730.1, Ppup012980.1, Ppup013200.1, Ppup014100.1, Ppup018690.1, Ppup018870.1, Ppup019150.1, Ppup019460.1, Ppup019810.1, Ppup019950.1, Ppup021480.1, Ppup022280.1, Ppup025910.1, Ppup028340.1, Ppup028770.1, Ppup034100.1, Ppup035890.1, Ppup035940.1, Ppup039050.1, Ppup039790.1, Ppup039960.1, Ppup042410.1, Ppup043580.1, Ppup043600.1, Ppup046…
GO:0007276	BP	e	gamete generation	71/2424	241/10157	0.0464047	3	71	0.475011	Ppup001870.1, Ppup007260.1, Ppup015890.1, Ppup017950.1, Ppup018070.1, Ppup018600.1, Ppup018870.1, Ppup021300.1, Ppup022030.1, Ppup024270.1, Ppup026960.1, Ppup027050.1, Ppup027070.1, Ppup027410.1, Ppup027500.1, Ppup027680.1, Ppup027950.1, Ppup030870.1, Ppup031700.1, Ppup035260.1, Ppup035800.1, Ppup039560.1, Ppup052530.1, Ppup052950.1, Ppup052960.1, Ppup053540.1, Ppup054240.1, Ppup054380.1, Ppup056…
GO:0034613	BP	e	cellular protein localization	124/2424	445/10157	0.0464616	4	124	0.475158	Ppup003170.1, Ppup003230.1, Ppup004540.1, Ppup006950.1, Ppup007710.1, Ppup009830.1, Ppup010280.1, Ppup011220.1, Ppup013930.1, Ppup015740.1, Ppup016190.1, Ppup018600.1, Ppup021180.1, Ppup021780.1, Ppup022170.1, Ppup024560.1, Ppup025920.1, Ppup026440.1, Ppup026960.1, Ppup027410.1, Ppup027500.1, Ppup033420.1, Ppup035750.1, Ppup037330.1, Ppup040260.1, Ppup046560.1, Ppup048800.1, Ppup048860.1, Ppup049…
GO:0031667	BP	e	response to nutrient levels	52/2424	171/10157	0.0465436	4	52	0.475562	Ppup003740.1, Ppup005940.1, Ppup009730.1, Ppup012590.1, Ppup016190.1, Ppup021150.1, Ppup021300.1, Ppup022290.1, Ppup026550.1, Ppup027200.1, Ppup027250.1, Ppup027280.1, Ppup028400.1, Ppup035420.1, Ppup043580.1, Ppup046770.1, Ppup046980.1, Ppup058440.1, Ppup069310.1, Ppup076300.1, Ppup076900.1, Ppup084770.1, Ppup092000.1, Ppup094510.1, Ppup110950.1, Ppup112480.1, Ppup116700.1, Ppup119520.1, Ppup122…
GO:0060284	BP	e	regulation of cell development	105/2424	372/10157	0.0473512	5	105	0.483372	Ppup001800.1, Ppup004180.1, Ppup004410.1, Ppup005490.1, Ppup006950.1, Ppup010280.1, Ppup017950.1, Ppup018680.1, Ppup018760.1, Ppup022170.1, Ppup024220.1, Ppup025100.1, Ppup025690.1, Ppup025760.1, Ppup026370.1, Ppup026960.1, Ppup027050.1, Ppup027280.1, Ppup027410.1, Ppup028360.1, Ppup030870.1, Ppup035800.1, Ppup037880.1, Ppup039960.1, Ppup040010.1, Ppup040760.1, Ppup042910.1, Ppup043150.1, Ppup046…
GO:0045732	BP	e	positive regulation of protein catabolic process	30/2424	91/10157	0.0476213	7	30	0.483595	Ppup005320.1, Ppup020080.1, Ppup029460.1, Ppup037330.1, Ppup039790.1, Ppup049010.1, Ppup050100.1, Ppup050680.1, Ppup050770.1, Ppup052760.1, Ppup057490.1, Ppup057970.1, Ppup061620.1, Ppup063940.1, Ppup075920.1, Ppup076390.1, Ppup080280.1, Ppup087280.1, Ppup090810.1, Ppup095620.1, Ppup103270.1, Ppup114460.1, Ppup117270.1, Ppup122830.1, Ppup125670.1, Ppup140310.1, Ppup146570.1, Ppup160690.1, Ppup161…
GO:0010675	BP	e	regulation of cellular carbohydrate metabolic process	14/2424	36/10157	0.0477439	6	14	0.483595	Ppup005470.1, Ppup026550.1, Ppup052760.1, Ppup075960.1, Ppup094070.1, Ppup095640.1, Ppup103510.1, Ppup123340.1, Ppup125780.1, Ppup144280.1, Ppup145020.1, Ppup152710.1, Ppup160690.1, Ppup176270.1
GO:0051017	BP	e	actin filament bundle assembly	14/2424	36/10157	0.0477439	7	14	0.483595	Ppup020360.1, Ppup020370.1, Ppup027050.1, Ppup063140.1, Ppup087330.1, Ppup092160.1, Ppup101280.1, Ppup103510.1, Ppup119510.1, Ppup126130.1, Ppup142060.1, Ppup165030.1, Ppup171700.1, Ppup174910.1
GO:0000045	BP	e	autophagosome assembly	14/2424	36/10157	0.0477439	7	14	0.483595	Ppup012590.1, Ppup049570.1, Ppup054530.1, Ppup058440.1, Ppup084770.1, Ppup099640.1, Ppup110950.1, Ppup116340.1, Ppup122320.1, Ppup122830.1, Ppup126550.1, Ppup133260.1, Ppup161610.1, Ppup169690.1
GO:0043122	BP	e	regulation of I-kappaB kinase/NF-kappaB signaling	14/2424	36/10157	0.0477439	7	14	0.483595	Ppup006500.1, Ppup008760.1, Ppup013130.1, Ppup048770.1, Ppup050170.1, Ppup075430.1, Ppup083600.1, Ppup112100.1, Ppup122870.1, Ppup126560.1, Ppup134990.1, Ppup140050.1, Ppup142110.1, Ppup171660.1
GO:0043488	BP	e	regulation of mRNA stability	16/2424	43/10157	0.0479355	9	16	0.483595	Ppup011730.1, Ppup015890.1, Ppup026790.1, Ppup036470.1, Ppup040010.1, Ppup058640.1, Ppup076900.1, Ppup084660.1, Ppup086780.1, Ppup114980.1, Ppup114990.1, Ppup122610.1, Ppup139800.1, Ppup154550.1, Ppup168420.1, Ppup173830.1
GO:0002283	BP	e	neutrophil activation involved in immune response	16/2424	43/10157	0.0479355	7	16	0.483595	Ppup001870.1, Ppup043610.1, Ppup053510.1, Ppup082260.1, Ppup086420.1, Ppup091630.1, Ppup102180.1, Ppup116770.1, Ppup122120.1, Ppup124670.1, Ppup152050.1, Ppup166870.1, Ppup171660.1, Ppup172290.1, Ppup173320.1, Ppup173440.1
GO:0043312	BP	e	neutrophil degranulation	16/2424	43/10157	0.0479355	9	16	0.483595	Ppup001870.1, Ppup043610.1, Ppup053510.1, Ppup082260.1, Ppup086420.1, Ppup091630.1, Ppup102180.1, Ppup116770.1, Ppup122120.1, Ppup124670.1, Ppup152050.1, Ppup166870.1, Ppup171660.1, Ppup172290.1, Ppup173320.1, Ppup173440.1
GO:0051924	BP	e	regulation of calcium ion transport	16/2424	43/10157	0.0479355	7	16	0.483595	Ppup003230.1, Ppup011220.1, Ppup017930.1, Ppup026440.1, Ppup038960.1, Ppup069270.1, Ppup075540.1, Ppup094070.1, Ppup097670.1, Ppup109830.1, Ppup109840.1, Ppup122830.1, Ppup140050.1, Ppup144880.1, Ppup149470.1, Ppup163840.1
GO:0002275	BP	e	myeloid cell activation involved in immune response	16/2424	43/10157	0.0479355	5	16	0.483595	Ppup001870.1, Ppup043610.1, Ppup053510.1, Ppup082260.1, Ppup086420.1, Ppup091630.1, Ppup102180.1, Ppup116770.1, Ppup122120.1, Ppup124670.1, Ppup152050.1, Ppup166870.1, Ppup171660.1, Ppup172290.1, Ppup173320.1, Ppup173440.1
GO:0006342	BP	e	chromatin silencing	16/2424	43/10157	0.0479355	11	16	0.483595	Ppup013200.1, Ppup018600.1, Ppup018870.1, Ppup022280.1, Ppup025760.1, Ppup039420.1, Ppup040370.1, Ppup040380.1, Ppup050210.1, Ppup053830.1, Ppup104340.1, Ppup123820.1, Ppup127650.1, Ppup140070.1, Ppup171700.1, Ppup175160.1
GO:0071363	BP	e	cellular response to growth factor stimulus	16/2424	43/10157	0.0479355	5	16	0.483595	Ppup003910.1, Ppup004410.1, Ppup019150.1, Ppup019930.1, Ppup036980.1, Ppup043580.1, Ppup062600.1, Ppup077440.1, Ppup083740.1, Ppup094070.1, Ppup120280.1, Ppup123220.1, Ppup131150.1, Ppup144200.1, Ppup146370.1, Ppup156210.1
GO:0002263	BP	e	cell activation involved in immune response	21/2424	60/10157	0.0482914	3	21	0.484358	Ppup001870.1, Ppup026790.1, Ppup027280.1, Ppup043610.1, Ppup053510.1, Ppup082130.1, Ppup082260.1, Ppup086420.1, Ppup091630.1, Ppup102180.1, Ppup116770.1, Ppup122120.1, Ppup124670.1, Ppup141910.1, Ppup146820.1, Ppup152050.1, Ppup166870.1, Ppup171660.1, Ppup172290.1, Ppup173320.1, Ppup173440.1
GO:0002366	BP	e	leukocyte activation involved in immune response	21/2424	60/10157	0.0482914	4	21	0.484358	Ppup001870.1, Ppup026790.1, Ppup027280.1, Ppup043610.1, Ppup053510.1, Ppup082130.1, Ppup082260.1, Ppup086420.1, Ppup091630.1, Ppup102180.1, Ppup116770.1, Ppup122120.1, Ppup124670.1, Ppup141910.1, Ppup146820.1, Ppup152050.1, Ppup166870.1, Ppup171660.1, Ppup172290.1, Ppup173320.1, Ppup173440.1
GO:1902806	BP	e	regulation of cell cycle G1/S phase transition	19/2424	52/10157	0.0483486	7	19	0.484358	Ppup001720.1, Ppup003100.1, Ppup010940.1, Ppup019150.1, Ppup019460.1, Ppup027520.1, Ppup028340.1, Ppup039090.1, Ppup039790.1, Ppup046070.1, Ppup061660.1, Ppup064850.1, Ppup122630.1, Ppup133560.1, Ppup138980.1, Ppup139120.1, Ppup141010.1, Ppup141700.1, Ppup144760.1
GO:0036503	BP	e	ERAD pathway	19/2424	52/10157	0.0483486	8	19	0.484358	Ppup002900.1, Ppup006830.1, Ppup020080.1, Ppup021070.1, Ppup022310.1, Ppup038210.1, Ppup061580.1, Ppup063300.1, Ppup075210.1, Ppup075920.1, Ppup092790.1, Ppup095780.1, Ppup106300.1, Ppup106350.1, Ppup111430.1, Ppup122830.1, Ppup127830.1, Ppup130220.1, Ppup172490.1
GO:0098660	BP	e	inorganic ion transmembrane transport	45/2424	146/10157	0.0505782	6	45	0.484358	Ppup002250.1, Ppup006500.1, Ppup007780.1, Ppup017880.1, Ppup018310.1, Ppup020100.1, Ppup020860.1, Ppup021490.1, Ppup025890.1, Ppup031630.1, Ppup040030.1, Ppup046230.1, Ppup052420.1, Ppup053760.1, Ppup059950.1, Ppup060330.1, Ppup063560.1, Ppup071180.1, Ppup075450.1, Ppup076180.1, Ppup085610.1, Ppup086960.1, Ppup092830.1, Ppup093570.1, Ppup094310.1, Ppup099860.1, Ppup101040.1, Ppup106580.1, Ppup109…
GO:0051489	BP	e	regulation of filopodium assembly	12/2424	30/10157	0.0511215	8	12	0.484358	Ppup022170.1, Ppup024690.1, Ppup027500.1, Ppup050970.1, Ppup084280.1, Ppup090820.1, Ppup095850.1, Ppup101150.1, Ppup113560.1, Ppup126790.1, Ppup133890.1, Ppup145980.1
GO:1903509	BP	e	liposaccharide metabolic process	19/2424	53/10157	0.0511667	4	19	0.484358	Ppup001870.1, Ppup004080.1, Ppup018240.1, Ppup026430.1, Ppup027260.1, Ppup029370.1, Ppup040690.1, Ppup070660.1, Ppup086980.1, Ppup101150.1, Ppup123980.1, Ppup126400.1, Ppup127210.1, Ppup138760.1, Ppup140310.1, Ppup141050.1, Ppup147120.1, Ppup173320.1, Ppup175720.1
GO:0071478	BP	e	cellular response to radiation	19/2424	53/10157	0.0511667	5	19	0.484358	Ppup002240.1, Ppup004450.1, Ppup005470.1, Ppup011260.1, Ppup019150.1, Ppup019460.1, Ppup025100.1, Ppup030870.1, Ppup035800.1, Ppup039790.1, Ppup040660.1, Ppup062660.1, Ppup079870.1, Ppup082130.1, Ppup093660.1, Ppup117200.1, Ppup132070.1, Ppup139870.1, Ppup144610.1
GO:0006664	BP	e	glycolipid metabolic process	19/2424	53/10157	0.0511667	6	19	0.484358	Ppup001870.1, Ppup004080.1, Ppup018240.1, Ppup026430.1, Ppup027260.1, Ppup029370.1, Ppup040690.1, Ppup070660.1, Ppup086980.1, Ppup101150.1, Ppup123980.1, Ppup126400.1, Ppup127210.1, Ppup138760.1, Ppup140310.1, Ppup141050.1, Ppup147120.1, Ppup173320.1, Ppup175720.1
GO:0006110	BP	e	regulation of glycolytic process	8/2424	18/10157	0.0516111	9	8	0.484358	Ppup052760.1, Ppup097870.1, Ppup123340.1, Ppup125780.1, Ppup160690.1, Ppup168410.1, Ppup171790.1, Ppup176270.1
GO:0007520	BP	e	myoblast fusion	8/2424	18/10157	0.0516111	5	8	0.484358	Ppup018590.1, Ppup031730.1, Ppup043740.1, Ppup086270.1, Ppup114050.1, Ppup119950.1, Ppup162500.1, Ppup171780.1
GO:0002474	BP	e	antigen processing and presentation of peptide antigen via MHC class I	8/2424	18/10157	0.0516111	4	8	0.484358	Ppup057080.1, Ppup063940.1, Ppup086720.1, Ppup094800.1, Ppup112100.1, Ppup114980.1, Ppup114990.1, Ppup146870.1
GO:0019915	BP	e	lipid storage	8/2424	18/10157	0.0516111	4	8	0.484358	Ppup001870.1, Ppup018590.1, Ppup024580.1, Ppup050680.1, Ppup056640.1, Ppup140970.1, Ppup140980.1, Ppup141530.1
GO:0006909	BP	e	phagocytosis	8/2424	18/10157	0.0516111	5	8	0.484358	Ppup022170.1, Ppup040410.1, Ppup092540.1, Ppup105750.1, Ppup113560.1, Ppup125730.1, Ppup130170.1, Ppup174910.1
GO:0048864	BP	e	stem cell development	8/2424	18/10157	0.0516111	4	8	0.484358	Ppup011560.1, Ppup110010.1, Ppup114690.1, Ppup120090.1, Ppup123780.1, Ppup130440.1, Ppup152740.1, Ppup169510.1
GO:0050994	BP	e	regulation of lipid catabolic process	8/2424	18/10157	0.0516111	6	8	0.484358	Ppup011120.1, Ppup021300.1, Ppup025880.1, Ppup047250.1, Ppup060140.1, Ppup140970.1, Ppup140980.1, Ppup162270.1
GO:0030330	BP	e	DNA damage response, signal transduction by p53 class mediator	8/2424	18/10157	0.0516111	7	8	0.484358	Ppup018270.1, Ppup027520.1, Ppup037560.1, Ppup093660.1, Ppup122870.1, Ppup138980.1, Ppup141700.1, Ppup144760.1
GO:0031646	BP	e	positive regulation of nervous system process	8/2424	18/10157	0.0516111	6	8	0.484358	Ppup004150.1, Ppup010280.1, Ppup052260.1, Ppup098040.1, Ppup110970.1, Ppup114530.1, Ppup140310.1, Ppup145860.1
GO:0007423	BP	e	sensory organ development	42/2424	134/10157	0.0518612	4	42	0.484358	Ppup006660.1, Ppup007260.1, Ppup011100.1, Ppup011200.1, Ppup019930.1, Ppup024130.1, Ppup025760.1, Ppup027050.1, Ppup049390.1, Ppup053540.1, Ppup054390.1, Ppup058220.1, Ppup058840.1, Ppup059650.1, Ppup063470.1, Ppup071370.1, Ppup074880.1, Ppup075540.1, Ppup077520.1, Ppup085360.1, Ppup085760.1, Ppup085820.1, Ppup092260.1, Ppup095370.1, Ppup095740.1, Ppup103620.1, Ppup104710.1, Ppup110290.1, Ppup114…
GO:0090181	BP	e	regulation of cholesterol metabolic process	7/2424	14/10157	0.0519365	7	7	0.484358	Ppup043200.1, Ppup045850.1, Ppup102180.1, Ppup104600.1, Ppup109420.1, Ppup109430.1, Ppup126800.1
GO:0034389	BP	e	lipid droplet organization	7/2424	14/10157	0.0519365	5	7	0.484358	Ppup007260.1, Ppup024580.1, Ppup075690.1, Ppup090760.1, Ppup140980.1, Ppup152730.1, Ppup153590.1
GO:0030522	BP	e	intracellular receptor signaling pathway	7/2424	14/10157	0.0519365	5	7	0.484358	Ppup004410.1, Ppup035070.1, Ppup037010.1, Ppup061660.1, Ppup116340.1, Ppup139070.1, Ppup162360.1
GO:0061001	BP	e	regulation of dendritic spine morphogenesis	7/2424	14/10157	0.0519365	11	7	0.484358	Ppup004410.1, Ppup052710.1, Ppup075890.1, Ppup086420.1, Ppup098040.1, Ppup124670.1, Ppup145860.1
GO:0030952	BP	e	establishment or maintenance of cytoskeleton polarity	7/2424	14/10157	0.0519365	6	7	0.484358	Ppup027500.1, Ppup044250.1, Ppup085930.1, Ppup086980.1, Ppup140100.1, Ppup157110.1, Ppup168280.1
GO:0051445	BP	e	regulation of meiotic cell cycle	7/2424	14/10157	0.0519365	5	7	0.484358	Ppup015890.1, Ppup018680.1, Ppup021180.1, Ppup021300.1, Ppup040010.1, Ppup047890.1, Ppup132070.1
GO:1901222	BP	e	regulation of NIK/NF-kappaB signaling	7/2424	14/10157	0.0519365	7	7	0.484358	Ppup019150.1, Ppup019460.1, Ppup026790.1, Ppup027200.1, Ppup038890.1, Ppup126560.1, Ppup162360.1
GO:0043542	BP	e	endothelial cell migration	7/2424	14/10157	0.0519365	7	7	0.484358	Ppup003170.1, Ppup047250.1, Ppup053410.1, Ppup060140.1, Ppup115290.1, Ppup141550.1, Ppup162270.1
GO:0070828	BP	e	heterochromatin organization	7/2424	14/10157	0.0519365	5	7	0.484358	Ppup018600.1, Ppup076270.1, Ppup076280.1, Ppup092260.1, Ppup140190.1, Ppup142580.1, Ppup163240.1
GO:0046580	BP	e	negative regulation of Ras protein signal transduction	7/2424	14/10157	0.0519365	9	7	0.484358	Ppup005490.1, Ppup036980.1, Ppup057830.1, Ppup111590.1, Ppup114420.1, Ppup125780.1, Ppup126130.1
GO:0051259	BP	e	protein complex oligomerization	46/2424	149/10157	0.0522372	6	46	0.484358	Ppup008630.1, Ppup021150.1, Ppup025880.1, Ppup027280.1, Ppup028780.1, Ppup029370.1, Ppup046280.1, Ppup048450.1, Ppup048770.1, Ppup052290.1, Ppup052600.1, Ppup054150.1, Ppup063560.1, Ppup063940.1, Ppup064880.1, Ppup071180.1, Ppup076180.1, Ppup080230.1, Ppup081840.1, Ppup086080.1, Ppup087280.1, Ppup090610.1, Ppup092830.1, Ppup095230.1, Ppup096440.1, Ppup096970.1, Ppup098040.1, Ppup103150.1, Ppup104…
GO:1903706	BP	e	regulation of hemopoiesis	28/2424	84/10157	0.0527495	5	28	0.484358	Ppup026790.1, Ppup035960.1, Ppup037880.1, Ppup040010.1, Ppup043580.1, Ppup048850.1, Ppup057830.1, Ppup061630.1, Ppup066020.1, Ppup069210.1, Ppup069390.1, Ppup085360.1, Ppup086710.1, Ppup101150.1, Ppup106650.1, Ppup109060.1, Ppup110880.1, Ppup112260.1, Ppup114980.1, Ppup114990.1, Ppup124580.1, Ppup133560.1, Ppup138980.1, Ppup139640.1, Ppup142970.1, Ppup162190.1, Ppup162360.1, Ppup167810.1
GO:0045055	BP	e	regulated exocytosis	28/2424	84/10157	0.0527495	7	28	0.484358	Ppup001870.1, Ppup008830.1, Ppup010330.1, Ppup018240.1, Ppup027680.1, Ppup043610.1, Ppup052260.1, Ppup053510.1, Ppup058040.1, Ppup082260.1, Ppup082790.1, Ppup086420.1, Ppup091630.1, Ppup102180.1, Ppup108370.1, Ppup113230.1, Ppup116770.1, Ppup122120.1, Ppup124670.1, Ppup146980.1, Ppup152050.1, Ppup165800.1, Ppup165850.1, Ppup166870.1, Ppup171660.1, Ppup172290.1, Ppup173320.1, Ppup173440.1
GO:1900542	BP	e	regulation of purine nucleotide metabolic process	10/2424	24/10157	0.0529845	8	10	0.484358	Ppup052760.1, Ppup057830.1, Ppup097870.1, Ppup123340.1, Ppup125780.1, Ppup140050.1, Ppup160690.1, Ppup168410.1, Ppup171790.1, Ppup176270.1
GO:1901185	BP	e	negative regulation of ERBB signaling pathway	10/2424	24/10157	0.0529845	7	10	0.484358	Ppup021570.1, Ppup024510.1, Ppup042910.1, Ppup058670.1, Ppup071390.1, Ppup086620.1, Ppup114050.1, Ppup150610.1, Ppup166650.1, Ppup174910.1
GO:0042059	BP	e	negative regulation of epidermal growth factor receptor signaling pathway	10/2424	24/10157	0.0529845	8	10	0.484358	Ppup021570.1, Ppup024510.1, Ppup042910.1, Ppup058670.1, Ppup071390.1, Ppup086620.1, Ppup114050.1, Ppup150610.1, Ppup166650.1, Ppup174910.1
GO:0007154	BP	e	cell communication	85/2424	297/10157	0.0531905	2	85	0.484358	Ppup003230.1, Ppup004180.1, Ppup004420.1, Ppup008830.1, Ppup009190.1, Ppup009730.1, Ppup009820.1, Ppup011220.1, Ppup012590.1, Ppup016190.1, Ppup018140.1, Ppup019200.1, Ppup021150.1, Ppup021300.1, Ppup022170.1, Ppup022290.1, Ppup024560.1, Ppup024570.1, Ppup027200.1, Ppup027280.1, Ppup027410.1, Ppup027680.1, Ppup028400.1, Ppup035420.1, Ppup039980.1, Ppup045860.1, Ppup048860.1, Ppup053760.1, Ppup054…
GO:0070372	BP	e	regulation of ERK1 and ERK2 cascade	14/2424	37/10157	0.0533446	10	14	0.484358	Ppup001800.1, Ppup006490.1, Ppup014250.1, Ppup035940.1, Ppup057830.1, Ppup062600.1, Ppup077440.1, Ppup081850.1, Ppup084440.1, Ppup086710.1, Ppup104470.1, Ppup114050.1, Ppup146370.1, Ppup174910.1
GO:0016042	BP	e	lipid catabolic process	50/2424	165/10157	0.0533582	4	50	0.484358	Ppup001760.1, Ppup001870.1, Ppup002240.1, Ppup002530.1, Ppup002680.1, Ppup005460.1, Ppup011120.1, Ppup017930.1, Ppup021420.1, Ppup022260.1, Ppup025880.1, Ppup026430.1, Ppup033140.1, Ppup038150.1, Ppup040840.1, Ppup047250.1, Ppup050480.1, Ppup059820.1, Ppup060140.1, Ppup062660.1, Ppup070660.1, Ppup074780.1, Ppup077020.1, Ppup077060.1, Ppup086660.1, Ppup090610.1, Ppup094670.1, Ppup098060.1, Ppup101…
GO:0001558	BP	e	regulation of cell growth	38/2424	121/10157	0.0537118	5	38	0.484358	Ppup024220.1, Ppup024270.1, Ppup027410.1, Ppup028360.1, Ppup030870.1, Ppup035800.1, Ppup038210.1, Ppup042930.1, Ppup046770.1, Ppup048090.1, Ppup056640.1, Ppup057830.1, Ppup075380.1, Ppup075410.1, Ppup075920.1, Ppup077340.1, Ppup086420.1, Ppup090910.1, Ppup094460.1, Ppup103750.1, Ppup110950.1, Ppup120140.1, Ppup124670.1, Ppup125780.1, Ppup134150.1, Ppup134310.1, Ppup137390.1, Ppup139120.1, Ppup140…
GO:0097435	BP	e	supramolecular fiber organization	55/2424	183/10157	0.0538745	4	55	0.484358	Ppup004200.1, Ppup016190.1, Ppup017690.1, Ppup020230.1, Ppup020360.1, Ppup020370.1, Ppup021210.1, Ppup022170.1, Ppup026370.1, Ppup027050.1, Ppup036080.1, Ppup040210.1, Ppup042150.1, Ppup046730.1, Ppup059740.1, Ppup063140.1, Ppup063520.1, Ppup064390.1, Ppup075410.1, Ppup081840.1, Ppup086470.1, Ppup087330.1, Ppup090780.1, Ppup090820.1, Ppup091240.1, Ppup092160.1, Ppup092470.1, Ppup101280.1, Ppup102…
GO:0032465	BP	e	regulation of cytokinesis	17/2424	46/10157	0.0542427	6	17	0.484358	Ppup018600.1, Ppup023070.1, Ppup025490.1, Ppup036920.1, Ppup053540.1, Ppup057830.1, Ppup075410.1, Ppup091990.1, Ppup092800.1, Ppup099200.1, Ppup104210.1, Ppup110010.1, Ppup126130.1, Ppup140810.1, Ppup144610.1, Ppup160440.1, Ppup161160.1
GO:0045814	BP	e	negative regulation of gene expression, epigenetic	17/2424	46/10157	0.0542427	7	17	0.484358	Ppup003930.1, Ppup013200.1, Ppup018600.1, Ppup018870.1, Ppup022280.1, Ppup025760.1, Ppup039420.1, Ppup040370.1, Ppup040380.1, Ppup050210.1, Ppup053830.1, Ppup104340.1, Ppup123820.1, Ppup127650.1, Ppup140070.1, Ppup171700.1, Ppup175160.1
GO:0043487	BP	e	regulation of RNA stability	17/2424	46/10157	0.0542427	7	17	0.484358	Ppup011730.1, Ppup015890.1, Ppup026790.1, Ppup036470.1, Ppup040010.1, Ppup058640.1, Ppup076900.1, Ppup084660.1, Ppup086780.1, Ppup111390.1, Ppup114980.1, Ppup114990.1, Ppup122610.1, Ppup139800.1, Ppup154550.1, Ppup168420.1, Ppup173830.1
GO:0043933	BP	e	protein-containing complex subunit organization	190/2424	707/10157	0.0546954	4	190	0.484358	Ppup001800.1, Ppup003030.1, Ppup005800.1, Ppup006440.1, Ppup008630.1, Ppup008690.1, Ppup010210.1, Ppup014100.1, Ppup015790.1, Ppup016840.1, Ppup017690.1, Ppup018070.1, Ppup018270.1, Ppup018550.1, Ppup018890.1, Ppup019950.1, Ppup021150.1, Ppup021210.1, Ppup022170.1, Ppup022280.1, Ppup023730.1, Ppup023850.1, Ppup024270.1, Ppup024750.1, Ppup025130.1, Ppup025700.1, Ppup025880.1, Ppup025920.1, Ppup026…
GO:0055082	BP	e	cellular chemical homeostasis	55/2424	184/10157	0.0551412	5	55	0.484358	Ppup001870.1, Ppup003230.1, Ppup004080.1, Ppup004140.1, Ppup006500.1, Ppup008700.1, Ppup009820.1, Ppup009900.1, Ppup017930.1, Ppup020860.1, Ppup021350.1, Ppup021490.1, Ppup025890.1, Ppup026550.1, Ppup029430.1, Ppup039980.1, Ppup046850.1, Ppup059950.1, Ppup060330.1, Ppup061710.1, Ppup062660.1, Ppup064610.1, Ppup075380.1, Ppup075540.1, Ppup079800.1, Ppup083070.1, Ppup092790.1, Ppup093110.1, Ppup093…
GO:0007281	BP	e	germ cell development	47/2424	153/10157	0.0553499	4	47	0.484358	Ppup001870.1, Ppup015880.1, Ppup015890.1, Ppup017950.1, Ppup018070.1, Ppup021300.1, Ppup022170.1, Ppup024270.1, Ppup026670.1, Ppup027050.1, Ppup027070.1, Ppup027500.1, Ppup031020.1, Ppup031700.1, Ppup037770.1, Ppup039560.1, Ppup048860.1, Ppup052950.1, Ppup052960.1, Ppup053540.1, Ppup076330.1, Ppup082950.1, Ppup084930.1, Ppup085140.1, Ppup085930.1, Ppup086980.1, Ppup086990.1, Ppup094290.1, Ppup095…
GO:0006898	BP	e	receptor-mediated endocytosis	22/2424	64/10157	0.0553967	6	22	0.484358	Ppup003030.1, Ppup004080.1, Ppup004540.1, Ppup006040.1, Ppup006490.1, Ppup012590.1, Ppup050380.1, Ppup050680.1, Ppup057970.1, Ppup063370.1, Ppup065980.1, Ppup076850.1, Ppup092470.1, Ppup093440.1, Ppup094800.1, Ppup103270.1, Ppup109160.1, Ppup113230.1, Ppup113560.1, Ppup135110.1, Ppup145980.1, Ppup164060.1
GO:0006839	BP	e	mitochondrial transport	22/2424	64/10157	0.0553967	4	22	0.484358	Ppup015740.1, Ppup035750.1, Ppup047090.1, Ppup049510.1, Ppup051070.1, Ppup063290.1, Ppup077110.1, Ppup093570.1, Ppup095230.1, Ppup096660.1, Ppup097640.1, Ppup099390.1, Ppup101040.1, Ppup127980.1, Ppup130380.1, Ppup135080.1, Ppup140440.1, Ppup144560.1, Ppup144990.1, Ppup146590.1, Ppup153300.1, Ppup171790.1
GO:0018105	BP	e	peptidyl-serine phosphorylation	22/2424	64/10157	0.0553967	9	22	0.484358	Ppup011260.1, Ppup018760.1, Ppup019650.1, Ppup021180.1, Ppup025490.1, Ppup035940.1, Ppup037330.1, Ppup037560.1, Ppup044250.1, Ppup046810.1, Ppup053660.1, Ppup059650.1, Ppup081980.1, Ppup084280.1, Ppup086710.1, Ppup093660.1, Ppup100660.1, Ppup112100.1, Ppup114810.1, Ppup126170.1, Ppup141810.1, Ppup161900.1
GO:0007005	BP	e	mitochondrion organization	43/2424	139/10157	0.0565027	5	43	0.484358	Ppup007560.1, Ppup018690.1, Ppup028300.1, Ppup035750.1, Ppup037910.1, Ppup043530.1, Ppup043580.1, Ppup048770.1, Ppup050770.1, Ppup052590.1, Ppup058440.1, Ppup062320.1, Ppup063060.1, Ppup063290.1, Ppup075690.1, Ppup076390.1, Ppup084770.1, Ppup085140.1, Ppup090610.1, Ppup093500.1, Ppup094510.1, Ppup095230.1, Ppup096660.1, Ppup096910.1, Ppup099390.1, Ppup101240.1, Ppup106660.1, Ppup110920.1, Ppup112…
GO:0001887	BP	e	selenium compound metabolic process	2/2424	2/10157	0.0569374	3	2	0.484358	Ppup023720.1, Ppup052590.1
GO:0050965	BP	e	detection of temperature stimulus involved in sensory perception of pain	2/2424	2/10157	0.0569374	6	2	0.484358	Ppup086960.1, Ppup109260.1
GO:0032189	BP	e	maintenance of actomyosin contractile ring localization	2/2424	2/10157	0.0569374	6	2	0.484358	Ppup053540.1, Ppup160440.1
GO:0015755	BP	e	fructose transmembrane transport	2/2424	2/10157	0.0569374	9	2	0.484358	Ppup071180.1, Ppup140860.1
GO:0061718	BP	e	glucose catabolic process to pyruvate	2/2424	2/10157	0.0569374	8	2	0.484358	Ppup026550.1, Ppup162500.1
GO:0042116	BP	e	macrophage activation	2/2424	2/10157	0.0569374	5	2	0.484358	Ppup105750.1, Ppup130170.1
GO:0003190	BP	e	atrioventricular valve formation	2/2424	2/10157	0.0569374	4	2	0.484358	Ppup044420.1, Ppup100570.1
GO:0034350	BP	e	regulation of glial cell apoptotic process	2/2424	2/10157	0.0569374	7	2	0.484358	Ppup084280.1, Ppup086710.1
GO:0021895	BP	e	cerebral cortex neuron differentiation	2/2424	2/10157	0.0569374	6	2	0.484358	Ppup075380.1, Ppup090610.1
GO:0006964	BP	e	positive regulation of biosynthetic process of antibacterial peptides active against Gram-negative bacteria	2/2424	2/10157	0.0569374	11	2	0.484358	Ppup027200.1, Ppup131770.1
GO:0046006	BP	e	regulation of activated T cell proliferation	2/2424	2/10157	0.0569374	9	2	0.484358	Ppup026790.1, Ppup153110.1
GO:0030578	BP	e	PML body organization	2/2424	2/10157	0.0569374	7	2	0.484358	Ppup093230.1, Ppup143800.1
GO:1990179	BP	e	protein localization to actomyosin contractile ring	2/2424	2/10157	0.0569374	8	2	0.484358	Ppup053540.1, Ppup160440.1
GO:1902175	BP	e	regulation of oxidative stress-induced intrinsic apoptotic signaling pathway	2/2424	2/10157	0.0569374	9	2	0.484358	Ppup027490.1, Ppup122830.1
GO:0006499	BP	e	N-terminal protein myristoylation	2/2424	2/10157	0.0569374	9	2	0.484358	Ppup005260.1, Ppup126560.1
GO:0006177	BP	e	GMP biosynthetic process	2/2424	2/10157	0.0569374	11	2	0.484358	Ppup105390.1, Ppup122800.1
GO:0050847	BP	e	progesterone receptor signaling pathway	2/2424	2/10157	0.0569374	8	2	0.484358	Ppup004410.1, Ppup035070.1
GO:0031087	BP	e	deadenylation-independent decapping of nuclear-transcribed mRNA	2/2424	2/10157	0.0569374	9	2	0.484358	Ppup103260.1, Ppup174190.1
GO:0072388	BP	e	flavin adenine dinucleotide biosynthetic process	2/2424	2/10157	0.0569374	9	2	0.484358	Ppup095050.1, Ppup095440.1
GO:0051729	BP	e	germline cell cycle switching, mitotic to meiotic cell cycle	2/2424	2/10157	0.0569374	8	2	0.484358	Ppup015890.1, Ppup021300.1
GO:0035434	BP	e	copper ion transmembrane transport	2/2424	2/10157	0.0569374	9	2	0.484358	Ppup020860.1, Ppup109770.1
GO:0006735	BP	e	NADH regeneration	2/2424	2/10157	0.0569374	3	2	0.484358	Ppup026550.1, Ppup162500.1
GO:0008062	BP	e	eclosion rhythm	2/2424	2/10157	0.0569374	4	2	0.484358	Ppup040930.1, Ppup143520.1
GO:0072576	BP	e	liver morphogenesis	2/2424	2/10157	0.0569374	5	2	0.484358	Ppup066020.1, Ppup126130.1
GO:0036213	BP	e	contractile ring contraction	2/2424	2/10157	0.0569374	4	2	0.484358	Ppup048860.1, Ppup174480.1
GO:0099640	BP	e	axo-dendritic protein transport	2/2424	2/10157	0.0569374	10	2	0.484358	Ppup011180.1, Ppup140190.1
GO:0010424	BP	e	DNA methylation on cytosine within a CG sequence	2/2424	2/10157	0.0569374	11	2	0.484358	Ppup016230.1, Ppup145760.1
GO:0046351	BP	e	disaccharide biosynthetic process	2/2424	2/10157	0.0569374	6	2	0.484358	Ppup050800.1, Ppup125780.1
GO:0008346	BP	e	larval walking behavior	2/2424	2/10157	0.0569374	4	2	0.484358	Ppup094290.1, Ppup160840.1
GO:0035509	BP	e	negative regulation of myosin-light-chain-phosphatase activity	2/2424	2/10157	0.0569374	11	2	0.484358	Ppup041140.1, Ppup112100.1
GO:0090522	BP	e	vesicle tethering involved in exocytosis	2/2424	2/10157	0.0569374	5	2	0.484358	Ppup048860.1, Ppup106640.1
GO:0031064	BP	e	negative regulation of histone deacetylation	2/2424	2/10157	0.0569374	10	2	0.484358	Ppup058370.1, Ppup140050.1
GO:0061384	BP	e	heart trabecula morphogenesis	2/2424	2/10157	0.0569374	4	2	0.484358	Ppup002900.1, Ppup144880.1
GO:1902946	BP	e	protein localization to early endosome	2/2424	2/10157	0.0569374	7	2	0.484358	Ppup024560.1, Ppup137460.1
GO:0010133	BP	e	proline catabolic process to glutamate	2/2424	2/10157	0.0569374	11	2	0.484358	Ppup156530.1, Ppup161150.1
GO:0048671	BP	e	negative regulation of collateral sprouting	2/2424	2/10157	0.0569374	11	2	0.484358	Ppup028360.1, Ppup110950.1
GO:0097345	BP	e	mitochondrial outer membrane permeabilization	2/2424	2/10157	0.0569374	11	2	0.484358	Ppup101240.1, Ppup144460.1
GO:1990822	BP	e	basic amino acid transmembrane transport	2/2424	2/10157	0.0569374	10	2	0.484358	Ppup130380.1, Ppup154630.1
GO:0032776	BP	e	DNA methylation on cytosine	2/2424	2/10157	0.0569374	10	2	0.484358	Ppup016230.1, Ppup145760.1
GO:0043985	BP	e	histone H4-R3 methylation	2/2424	2/10157	0.0569374	11	2	0.484358	Ppup001800.1, Ppup106650.1
GO:0061614	BP	e	pri-miRNA transcription by RNA polymerase II	2/2424	2/10157	0.0569374	11	2	0.484358	Ppup037010.1, Ppup139070.1
GO:0006747	BP	e	FAD biosynthetic process	2/2424	2/10157	0.0569374	10	2	0.484358	Ppup095050.1, Ppup095440.1
GO:1904578	BP	e	response to thapsigargin	2/2424	2/10157	0.0569374	5	2	0.484358	Ppup094510.1, Ppup095230.1
GO:0015801	BP	e	aromatic amino acid transport	2/2424	2/10157	0.0569374	9	2	0.484358	Ppup130380.1, Ppup141890.1
GO:0035234	BP	e	ectopic germ cell programmed cell death	2/2424	2/10157	0.0569374	5	2	0.484358	Ppup026670.1, Ppup139130.1
GO:0003229	BP	e	ventricular cardiac muscle tissue development	2/2424	2/10157	0.0569374	7	2	0.484358	Ppup005470.1, Ppup132570.1
GO:0120175	BP	e	regulation of torso signaling pathway	2/2424	2/10157	0.0569374	6	2	0.484358	Ppup076330.1, Ppup101280.1
GO:0030714	BP	e	anterior/posterior axis specification, follicular epithelium	2/2424	2/10157	0.0569374	4	2	0.484358	Ppup109360.1, Ppup137460.1
GO:1903826	BP	e	arginine transmembrane transport	2/2424	2/10157	0.0569374	11	2	0.484358	Ppup130380.1, Ppup154630.1
GO:0032185	BP	e	septin cytoskeleton organization	2/2424	2/10157	0.0569374	6	2	0.484358	Ppup053540.1, Ppup160440.1
GO:0060314	BP	e	regulation of ryanodine-sensitive calcium-release channel activity	2/2424	2/10157	0.0569374	10	2	0.484358	Ppup038960.1, Ppup149470.1
GO:0075522	BP	e	IRES-dependent viral translational initiation	2/2424	2/10157	0.0569374	4	2	0.484358	Ppup144350.1, Ppup145020.1
GO:0062149	BP	e	detection of stimulus involved in sensory perception of pain	2/2424	2/10157	0.0569374	4	2	0.484358	Ppup086960.1, Ppup109260.1
GO:0036500	BP	e	ATF6-mediated unfolded protein response	2/2424	2/10157	0.0569374	6	2	0.484358	Ppup114920.1, Ppup126800.1
GO:0046726	BP	e	positive regulation by virus of viral protein levels in host cell	2/2424	2/10157	0.0569374	6	2	0.484358	Ppup007260.1, Ppup107050.1
GO:0097062	BP	e	dendritic spine maintenance	2/2424	2/10157	0.0569374	8	2	0.484358	Ppup020690.1, Ppup122880.1
GO:0045919	BP	e	positive regulation of cytolysis	2/2424	2/10157	0.0569374	5	2	0.484358	Ppup035960.1, Ppup116700.1
GO:1901726	BP	e	negative regulation of histone deacetylase activity	2/2424	2/10157	0.0569374	11	2	0.484358	Ppup058370.1, Ppup140050.1
GO:0000916	BP	e	actomyosin contractile ring contraction	2/2424	2/10157	0.0569374	5	2	0.484358	Ppup048860.1, Ppup174480.1
GO:1904579	BP	e	cellular response to thapsigargin	2/2424	2/10157	0.0569374	6	2	0.484358	Ppup094510.1, Ppup095230.1
GO:0007604	BP	e	phototransduction, UV	2/2424	2/10157	0.0569374	8	2	0.484358	Ppup002240.1, Ppup079870.1
GO:0097052	BP	e	L-kynurenine metabolic process	2/2424	2/10157	0.0569374	9	2	0.484358	Ppup083190.1, Ppup096400.1
GO:0060586	BP	e	multicellular organismal iron ion homeostasis	2/2424	2/10157	0.0569374	10	2	0.484358	Ppup126020.1, Ppup168340.1
GO:0071287	BP	e	cellular response to manganese ion	2/2424	2/10157	0.0569374	6	2	0.484358	Ppup021150.1, Ppup061580.1
GO:0061087	BP	e	positive regulation of histone H3-K27 methylation	2/2424	2/10157	0.0569374	11	2	0.484358	Ppup049720.1, Ppup176270.1
GO:2001293	BP	e	malonyl-CoA metabolic process	2/2424	2/10157	0.0569374	11	2	0.484358	Ppup052580.1, Ppup151070.1
GO:0016335	BP	e	morphogenesis of larval imaginal disc epithelium	2/2424	2/10157	0.0569374	5	2	0.484358	Ppup109360.1, Ppup137460.1
GO:0000961	BP	e	negative regulation of mitochondrial RNA catabolic process	2/2424	2/10157	0.0569374	9	2	0.484358	Ppup027120.1, Ppup146680.1
GO:1904016	BP	e	response to Thyroglobulin triiodothyronine	2/2424	2/10157	0.0569374	4	2	0.484358	Ppup041360.1, Ppup144280.1
GO:2000973	BP	e	regulation of pro-B cell differentiation	2/2424	2/10157	0.0569374	8	2	0.484358	Ppup057830.1, Ppup162190.1
GO:0010637	BP	e	negative regulation of mitochondrial fusion	2/2424	2/10157	0.0569374	8	2	0.484358	Ppup062320.1, Ppup101240.1
GO:0048332	BP	e	mesoderm morphogenesis	2/2424	2/10157	0.0569374	4	2	0.484358	Ppup003910.1, Ppup110010.1
GO:0043969	BP	e	histone H2B acetylation	2/2424	2/10157	0.0569374	12	2	0.484358	Ppup005470.1, Ppup140050.1
GO:0046719	BP	e	regulation by virus of viral protein levels in host cell	2/2424	2/10157	0.0569374	5	2	0.484358	Ppup007260.1, Ppup107050.1
GO:0140239	BP	e	postsynaptic endocytosis	2/2424	2/10157	0.0569374	6	2	0.484358	Ppup004540.1, Ppup135110.1
GO:0006419	BP	e	alanyl-tRNA aminoacylation	2/2424	2/10157	0.0569374	11	2	0.484358	Ppup124620.1, Ppup126520.1
GO:0002184	BP	e	cytoplasmic translational termination	2/2424	2/10157	0.0569374	8	2	0.484358	Ppup141140.1, Ppup142590.1
GO:0042758	BP	e	long-chain fatty acid catabolic process	2/2424	2/10157	0.0569374	9	2	0.484358	Ppup101160.1, Ppup114040.1
GO:0009256	BP	e	10-formyltetrahydrofolate metabolic process	2/2424	2/10157	0.0569374	8	2	0.484358	Ppup043390.1, Ppup137610.1
GO:0090185	BP	e	negative regulation of kidney development	2/2424	2/10157	0.0569374	6	2	0.484358	Ppup018960.1, Ppup057830.1
GO:0031223	BP	e	auditory behavior	2/2424	2/10157	0.0569374	3	2	0.484358	Ppup085610.1, Ppup098040.1
GO:1902319	BP	e	DNA strand elongation involved in nuclear cell cycle DNA replication	2/2424	2/10157	0.0569374	10	2	0.484358	Ppup052910.1, Ppup090620.1
GO:0055071	BP	e	manganese ion homeostasis	2/2424	2/10157	0.0569374	9	2	0.484358	Ppup006500.1, Ppup154520.1
GO:0034694	BP	e	response to prostaglandin	2/2424	2/10157	0.0569374	6	2	0.484358	Ppup035800.1, Ppup171790.1
GO:0002360	BP	e	T cell lineage commitment	2/2424	2/10157	0.0569374	4	2	0.484358	Ppup061630.1, Ppup162360.1
GO:0032516	BP	e	positive regulation of phosphoprotein phosphatase activity	2/2424	2/10157	0.0569374	10	2	0.484358	Ppup063210.1, Ppup121540.1
GO:0097053	BP	e	L-kynurenine catabolic process	2/2424	2/10157	0.0569374	10	2	0.484358	Ppup083190.1, Ppup096400.1
GO:0007415	BP	e	defasciculation of motor neuron axon	2/2424	2/10157	0.0569374	5	2	0.484358	Ppup025970.1, Ppup084350.1
GO:0035358	BP	e	regulation of peroxisome proliferator activated receptor signaling pathway	2/2424	2/10157	0.0569374	6	2	0.484358	Ppup053500.1, Ppup054230.1
GO:2000491	BP	e	positive regulation of hepatic stellate cell activation	2/2424	2/10157	0.0569374	6	2	0.484358	Ppup037880.1, Ppup109790.1
GO:0060711	BP	e	labyrinthine layer development	2/2424	2/10157	0.0569374	4	2	0.484358	Ppup023070.1, Ppup137540.1
GO:0071689	BP	e	muscle thin filament assembly	2/2424	2/10157	0.0569374	6	2	0.484358	Ppup064390.1, Ppup110820.1
GO:0070314	BP	e	G1 to G0 transition	2/2424	2/10157	0.0569374	3	2	0.484358	Ppup037640.1, Ppup137670.1
GO:1903025	BP	e	regulation of RNA polymerase II regulatory region sequence-specific DNA binding	2/2424	2/10157	0.0569374	6	2	0.484358	Ppup005470.1, Ppup173970.1
GO:1903400	BP	e	L-arginine transmembrane transport	2/2424	2/10157	0.0569374	12	2	0.484358	Ppup130380.1, Ppup154630.1
GO:0002813	BP	e	regulation of biosynthetic process of antibacterial peptides active against Gram-negative bacteria	2/2424	2/10157	0.0569374	10	2	0.484358	Ppup027200.1, Ppup131770.1
GO:1904498	BP	e	protein localization to mitotic actomyosin contractile ring	2/2424	2/10157	0.0569374	9	2	0.484358	Ppup053540.1, Ppup160440.1
GO:1902023	BP	e	L-arginine transport	2/2424	2/10157	0.0569374	11	2	0.484358	Ppup130380.1, Ppup154630.1
GO:0060736	BP	e	prostate gland growth	2/2424	2/10157	0.0569374	4	2	0.484358	Ppup004410.1, Ppup173320.1
GO:0034755	BP	e	iron ion transmembrane transport	2/2424	2/10157	0.0569374	9	2	0.484358	Ppup101040.1, Ppup154520.1
GO:0034756	BP	e	regulation of iron ion transport	2/2424	2/10157	0.0569374	7	2	0.484358	Ppup133270.1, Ppup154520.1
GO:0072741	BP	e	protein localization to cell division site	2/2424	2/10157	0.0569374	5	2	0.484358	Ppup053540.1, Ppup160440.1
GO:0006542	BP	e	glutamine biosynthetic process	2/2424	2/10157	0.0569374	10	2	0.484358	Ppup125730.1, Ppup125740.1
GO:0032187	BP	e	actomyosin contractile ring localization	2/2424	2/10157	0.0569374	5	2	0.484358	Ppup053540.1, Ppup160440.1
GO:1901073	BP	e	glucosamine-containing compound biosynthetic process	2/2424	2/10157	0.0569374	6	2	0.484358	Ppup113410.1, Ppup126240.1
GO:0008626	BP	e	granzyme-mediated apoptotic signaling pathway	2/2424	2/10157	0.0569374	6	2	0.484358	Ppup002900.1, Ppup101240.1
GO:1902296	BP	e	DNA strand elongation involved in cell cycle DNA replication	2/2424	2/10157	0.0569374	9	2	0.484358	Ppup052910.1, Ppup090620.1
GO:0009589	BP	e	detection of UV	2/2424	2/10157	0.0569374	6	2	0.484358	Ppup002240.1, Ppup079870.1
GO:0098935	BP	e	dendritic transport	2/2424	2/10157	0.0569374	8	2	0.484358	Ppup011180.1, Ppup140190.1
GO:0090315	BP	e	negative regulation of protein targeting to membrane	2/2424	2/10157	0.0569374	10	2	0.484358	Ppup094070.1, Ppup176270.1
GO:0048016	BP	e	inositol phosphate-mediated signaling	2/2424	2/10157	0.0569374	7	2	0.484358	Ppup038890.1, Ppup163850.1
GO:0098884	BP	e	postsynaptic neurotransmitter receptor internalization	2/2424	2/10157	0.0569374	10	2	0.484358	Ppup004540.1, Ppup135110.1
GO:0072387	BP	e	flavin adenine dinucleotide metabolic process	2/2424	2/10157	0.0569374	8	2	0.484358	Ppup095050.1, Ppup095440.1
GO:0051728	BP	e	cell cycle switching, mitotic to meiotic cell cycle	2/2424	2/10157	0.0569374	7	2	0.484358	Ppup015890.1, Ppup021300.1
GO:0007634	BP	e	optokinetic behavior	2/2424	2/10157	0.0569374	6	2	0.484358	Ppup082200.1, Ppup145930.1
GO:1902983	BP	e	DNA strand elongation involved in mitotic DNA replication	2/2424	2/10157	0.0569374	11	2	0.484358	Ppup052910.1, Ppup090620.1
GO:1990120	BP	e	messenger ribonucleoprotein complex assembly	2/2424	2/10157	0.0569374	8	2	0.484358	Ppup050410.1, Ppup162190.1
GO:0042268	BP	e	regulation of cytolysis	2/2424	2/10157	0.0569374	4	2	0.484358	Ppup035960.1, Ppup116700.1
GO:0009073	BP	e	aromatic amino acid family biosynthetic process	2/2424	2/10157	0.0569374	8	2	0.484358	Ppup137610.1, Ppup143530.1
GO:0030726	BP	e	male germline ring canal formation	2/2424	2/10157	0.0569374	7	2	0.484358	Ppup053540.1, Ppup160440.1
GO:0061621	BP	e	canonical glycolysis	2/2424	2/10157	0.0569374	15	2	0.484358	Ppup026550.1, Ppup162500.1
GO:0003222	BP	e	ventricular trabecula myocardium morphogenesis	2/2424	2/10157	0.0569374	7	2	0.484358	Ppup002900.1, Ppup144880.1
GO:0150066	BP	e	negative regulation of deacetylase activity	2/2424	2/10157	0.0569374	6	2	0.484358	Ppup058370.1, Ppup140050.1
GO:0071929	BP	e	alpha-tubulin acetylation	2/2424	2/10157	0.0569374	11	2	0.484358	Ppup025950.1, Ppup043580.1
GO:0060581	BP	e	cell fate commitment involved in pattern specification	2/2424	2/10157	0.0569374	4	2	0.484358	Ppup109360.1, Ppup137460.1
GO:1902775	BP	e	mitochondrial large ribosomal subunit assembly	2/2424	2/10157	0.0569374	9	2	0.484358	Ppup045770.1, Ppup052700.1
GO:0007412	BP	e	axon target recognition	2/2424	2/10157	0.0569374	3	2	0.484358	Ppup024570.1, Ppup144230.1
GO:0034351	BP	e	negative regulation of glial cell apoptotic process	2/2424	2/10157	0.0569374	8	2	0.484358	Ppup084280.1, Ppup086710.1
GO:0086045	BP	e	membrane depolarization during AV node cell action potential	2/2424	2/10157	0.0569374	7	2	0.484358	Ppup011220.1, Ppup171640.1
GO:0061383	BP	e	trabecula morphogenesis	2/2424	2/10157	0.0569374	3	2	0.484358	Ppup002900.1, Ppup144880.1
GO:0062028	BP	e	regulation of stress granule assembly	2/2424	2/10157	0.0569374	7	2	0.484358	Ppup168270.1, Ppup171790.1
GO:0043972	BP	e	histone H3-K23 acetylation	2/2424	2/10157	0.0569374	13	2	0.484358	Ppup028770.1, Ppup105670.1
GO:0051089	BP	e	constitutive protein ectodomain proteolysis	2/2424	2/10157	0.0569374	8	2	0.484358	Ppup086420.1, Ppup124670.1
GO:0034759	BP	e	regulation of iron ion transmembrane transport	2/2424	2/10157	0.0569374	8	2	0.484358	Ppup133270.1, Ppup154520.1
GO:0031106	BP	e	septin ring organization	2/2424	2/10157	0.0569374	7	2	0.484358	Ppup053540.1, Ppup160440.1
GO:0071596	BP	e	ubiquitin-dependent protein catabolic process via the N-end rule pathway	2/2424	2/10157	0.0569374	10	2	0.484358	Ppup018870.1, Ppup092330.1
GO:0043686	BP	e	co-translational protein modification	2/2424	2/10157	0.0569374	7	2	0.484358	Ppup011800.1, Ppup106300.1
GO:0034721	BP	e	histone H3-K4 demethylation, trimethyl-H3-K4-specific	2/2424	2/10157	0.0569374	12	2	0.484358	Ppup035890.1, Ppup091670.1
GO:0009449	BP	e	gamma-aminobutyric acid biosynthetic process	2/2424	2/10157	0.0569374	8	2	0.484358	Ppup055840.1, Ppup085610.1
GO:1903119	BP	e	protein localization to actin cytoskeleton	2/2424	2/10157	0.0569374	7	2	0.484358	Ppup053540.1, Ppup160440.1
GO:0060390	BP	e	regulation of SMAD protein signal transduction	2/2424	2/10157	0.0569374	7	2	0.484358	Ppup020310.1, Ppup052740.1
GO:1900452	BP	e	regulation of long-term synaptic depression	2/2424	2/10157	0.0569374	8	2	0.484358	Ppup098040.1, Ppup165290.1
GO:0036214	BP	e	contractile ring localization	2/2424	2/10157	0.0569374	4	2	0.484358	Ppup053540.1, Ppup160440.1
GO:1901725	BP	e	regulation of histone deacetylase activity	2/2424	2/10157	0.0569374	10	2	0.484358	Ppup058370.1, Ppup140050.1
GO:0060184	BP	e	cell cycle switching	2/2424	2/10157	0.0569374	3	2	0.484358	Ppup015890.1, Ppup021300.1
GO:0048857	BP	e	neural nucleus development	2/2424	2/10157	0.0569374	3	2	0.484358	Ppup145250.1, Ppup146870.1
GO:0050961	BP	e	detection of temperature stimulus involved in sensory perception	2/2424	2/10157	0.0569374	5	2	0.484358	Ppup086960.1, Ppup109260.1
GO:0006853	BP	e	carnitine shuttle	2/2424	2/10157	0.0569374	11	2	0.484358	Ppup051070.1, Ppup171790.1
GO:0018377	BP	e	protein myristoylation	2/2424	2/10157	0.0569374	8	2	0.484358	Ppup005260.1, Ppup126560.1
GO:0046443	BP	e	FAD metabolic process	2/2424	2/10157	0.0569374	9	2	0.484358	Ppup095050.1, Ppup095440.1
GO:0032000	BP	e	positive regulation of fatty acid beta-oxidation	2/2424	2/10157	0.0569374	9	2	0.484358	Ppup011120.1, Ppup025880.1
GO:0035360	BP	e	positive regulation of peroxisome proliferator activated receptor signaling pathway	2/2424	2/10157	0.0569374	7	2	0.484358	Ppup053500.1, Ppup054230.1
GO:2000045	BP	e	regulation of G1/S transition of mitotic cell cycle	17/2424	47/10157	0.058026	8	17	0.492121	Ppup001720.1, Ppup003100.1, Ppup010940.1, Ppup019150.1, Ppup019460.1, Ppup027520.1, Ppup039090.1, Ppup039790.1, Ppup046070.1, Ppup061660.1, Ppup064850.1, Ppup122630.1, Ppup138980.1, Ppup139120.1, Ppup141010.1, Ppup141700.1, Ppup144760.1
GO:0050792	BP	e	regulation of viral process	17/2424	47/10157	0.058026	4	17	0.492121	Ppup007260.1, Ppup019150.1, Ppup027520.1, Ppup031510.1, Ppup037010.1, Ppup040060.1, Ppup076900.1, Ppup094070.1, Ppup107050.1, Ppup120030.1, Ppup125670.1, Ppup126030.1, Ppup134690.1, Ppup138480.1, Ppup145020.1, Ppup154750.1, Ppup173170.1
GO:0001934	BP	e	positive regulation of protein phosphorylation	61/2424	207/10157	0.0583543	9	61	0.493077	Ppup005280.1, Ppup006490.1, Ppup013130.1, Ppup017930.1, Ppup022170.1, Ppup024570.1, Ppup026440.1, Ppup027410.1, Ppup027810.1, Ppup028810.1, Ppup030870.1, Ppup035940.1, Ppup036080.1, Ppup036980.1, Ppup037560.1, Ppup044130.1, Ppup044250.1, Ppup048770.1, Ppup049390.1, Ppup057310.1, Ppup057830.1, Ppup062600.1, Ppup075760.1, Ppup077440.1, Ppup083740.1, Ppup084440.1, Ppup085820.1, Ppup086470.1, Ppup086…
GO:0051640	BP	e	organelle localization	66/2424	226/10157	0.0585388	3	66	0.493077	Ppup004080.1, Ppup004180.1, Ppup005830.1, Ppup006440.1, Ppup006950.1, Ppup010210.1, Ppup015890.1, Ppup018600.1, Ppup027050.1, Ppup029460.1, Ppup030870.1, Ppup031510.1, Ppup043580.1, Ppup044000.1, Ppup046930.1, Ppup048860.1, Ppup052530.1, Ppup053250.1, Ppup053460.1, Ppup054430.1, Ppup055320.1, Ppup056640.1, Ppup059820.1, Ppup063440.1, Ppup075410.1, Ppup075690.1, Ppup079920.1, Ppup082200.1, Ppup084…
GO:1903578	BP	e	regulation of ATP metabolic process	12/2424	31/10157	0.058726	4	12	0.493077	Ppup052760.1, Ppup057830.1, Ppup097870.1, Ppup123000.1, Ppup123340.1, Ppup125780.1, Ppup133270.1, Ppup140050.1, Ppup160690.1, Ppup168410.1, Ppup171790.1, Ppup176270.1
GO:0000077	BP	e	DNA damage checkpoint	12/2424	31/10157	0.058726	8	12	0.493077	Ppup001720.1, Ppup025910.1, Ppup028810.1, Ppup037540.1, Ppup053830.1, Ppup062600.1, Ppup063850.1, Ppup084080.1, Ppup093660.1, Ppup117200.1, Ppup119530.1, Ppup132070.1
GO:0048488	BP	e	synaptic vesicle endocytosis	12/2424	31/10157	0.058726	7	12	0.493077	Ppup006440.1, Ppup010280.1, Ppup012590.1, Ppup056640.1, Ppup076850.1, Ppup085760.1, Ppup094800.1, Ppup112480.1, Ppup113230.1, Ppup135110.1, Ppup150900.1, Ppup153880.1
GO:0140238	BP	e	presynaptic endocytosis	12/2424	31/10157	0.058726	6	12	0.493077	Ppup006440.1, Ppup010280.1, Ppup012590.1, Ppup056640.1, Ppup076850.1, Ppup085760.1, Ppup094800.1, Ppup112480.1, Ppup113230.1, Ppup135110.1, Ppup150900.1, Ppup153880.1
GO:0042542	BP	e	response to hydrogen peroxide	12/2424	31/10157	0.058726	5	12	0.493077	Ppup004410.1, Ppup021780.1, Ppup037880.1, Ppup101240.1, Ppup120050.1, Ppup122720.1, Ppup123990.1, Ppup125290.1, Ppup144610.1, Ppup149470.1, Ppup151000.1, Ppup152000.1
GO:0031644	BP	e	regulation of nervous system process	12/2424	31/10157	0.058726	5	12	0.493077	Ppup004150.1, Ppup010280.1, Ppup020690.1, Ppup050410.1, Ppup050970.1, Ppup052260.1, Ppup098040.1, Ppup110970.1, Ppup114530.1, Ppup123810.1, Ppup140310.1, Ppup145860.1
GO:0051961	BP	e	negative regulation of nervous system development	32/2424	100/10157	0.0594526	6	32	0.493077	Ppup004410.1, Ppup005490.1, Ppup020690.1, Ppup025690.1, Ppup027280.1, Ppup027410.1, Ppup027690.1, Ppup028360.1, Ppup043150.1, Ppup057750.1, Ppup059940.1, Ppup064250.1, Ppup071370.1, Ppup075890.1, Ppup084450.1, Ppup092360.1, Ppup095740.1, Ppup101280.1, Ppup110950.1, Ppup114530.1, Ppup115160.1, Ppup120140.1, Ppup122960.1, Ppup130440.1, Ppup137670.1, Ppup142660.1, Ppup144230.1, Ppup150610.1, Ppup156…
GO:0050773	BP	e	regulation of dendrite development	20/2424	57/10157	0.0599231	9	20	0.493077	Ppup004410.1, Ppup010280.1, Ppup018680.1, Ppup030870.1, Ppup050970.1, Ppup052710.1, Ppup059650.1, Ppup064880.1, Ppup075890.1, Ppup077340.1, Ppup086420.1, Ppup090810.1, Ppup098040.1, Ppup103270.1, Ppup115160.1, Ppup120140.1, Ppup124670.1, Ppup135280.1, Ppup144230.1, Ppup145860.1
GO:0046320	BP	e	regulation of fatty acid oxidation	4/2424	7/10157	0.060493	7	4	0.493077	Ppup005940.1, Ppup011120.1, Ppup025880.1, Ppup052580.1
GO:0048148	BP	e	behavioral response to cocaine	4/2424	7/10157	0.060493	3	4	0.493077	Ppup040750.1, Ppup077470.1, Ppup143520.1, Ppup150640.1
GO:2000114	BP	e	regulation of establishment of cell polarity	4/2424	7/10157	0.060493	5	4	0.493077	Ppup005490.1, Ppup044250.1, Ppup084510.1, Ppup133060.1
GO:0055059	BP	e	asymmetric neuroblast division	4/2424	7/10157	0.060493	5	4	0.493077	Ppup122440.1, Ppup130440.1, Ppup137670.1, Ppup160910.1
GO:0010886	BP	e	positive regulation of cholesterol storage	4/2424	7/10157	0.060493	7	4	0.493077	Ppup047250.1, Ppup060140.1, Ppup120280.1, Ppup162270.1
GO:0008291	BP	e	acetylcholine metabolic process	4/2424	7/10157	0.060493	5	4	0.493077	Ppup144960.1, Ppup144970.1, Ppup168300.1, Ppup168320.1
GO:0006654	BP	e	phosphatidic acid biosynthetic process	4/2424	7/10157	0.060493	8	4	0.493077	Ppup004450.1, Ppup135100.1, Ppup167390.1, Ppup175750.1
GO:0043300	BP	e	regulation of leukocyte degranulation	4/2424	7/10157	0.060493	9	4	0.493077	Ppup020500.1, Ppup111590.1, Ppup140050.1, Ppup172340.1
GO:0071402	BP	e	cellular response to lipoprotein particle stimulus	4/2424	7/10157	0.060493	3	4	0.493077	Ppup043200.1, Ppup104600.1, Ppup109420.1, Ppup109430.1
GO:0034260	BP	e	negative regulation of GTPase activity	4/2424	7/10157	0.060493	6	4	0.493077	Ppup003170.1, Ppup006810.1, Ppup027280.1, Ppup084510.1
GO:0061040	BP	e	female gonad morphogenesis	4/2424	7/10157	0.060493	5	4	0.493077	Ppup008020.1, Ppup021200.1, Ppup045470.1, Ppup069510.1
GO:0010872	BP	e	regulation of cholesterol esterification	4/2424	7/10157	0.060493	7	4	0.493077	Ppup043200.1, Ppup104600.1, Ppup109420.1, Ppup109430.1
GO:0002690	BP	e	positive regulation of leukocyte chemotaxis	4/2424	7/10157	0.060493	9	4	0.493077	Ppup027810.1, Ppup086420.1, Ppup086470.1, Ppup124670.1
GO:0106120	BP	e	positive regulation of sterol biosynthetic process	4/2424	7/10157	0.060493	9	4	0.493077	Ppup043200.1, Ppup104600.1, Ppup109420.1, Ppup109430.1
GO:0060251	BP	e	regulation of glial cell proliferation	4/2424	7/10157	0.060493	8	4	0.493077	Ppup027410.1, Ppup037880.1, Ppup043150.1, Ppup114530.1
GO:0032570	BP	e	response to progesterone	4/2424	7/10157	0.060493	6	4	0.493077	Ppup003740.1, Ppup004410.1, Ppup035070.1, Ppup144280.1
GO:2000677	BP	e	regulation of transcription regulatory region DNA binding	4/2424	7/10157	0.060493	5	4	0.493077	Ppup005470.1, Ppup053830.1, Ppup075380.1, Ppup173970.1
GO:0046349	BP	e	amino sugar biosynthetic process	4/2424	7/10157	0.060493	5	4	0.493077	Ppup069030.1, Ppup113410.1, Ppup126240.1, Ppup133900.1
GO:0036296	BP	e	response to increased oxygen levels	4/2424	7/10157	0.060493	4	4	0.493077	Ppup046850.1, Ppup101240.1, Ppup126660.1, Ppup161610.1
GO:0006626	BP	e	protein targeting to mitochondrion	4/2424	7/10157	0.060493	10	4	0.493077	Ppup015740.1, Ppup063290.1, Ppup095230.1, Ppup099390.1
GO:0015816	BP	e	glycine transport	4/2424	7/10157	0.060493	10	4	0.493077	Ppup004420.1, Ppup031630.1, Ppup132870.1, Ppup136740.1
GO:1901186	BP	e	positive regulation of ERBB signaling pathway	4/2424	7/10157	0.060493	7	4	0.493077	Ppup092470.1, Ppup101280.1, Ppup162290.1, Ppup174910.1
GO:1900619	BP	e	acetate ester metabolic process	4/2424	7/10157	0.060493	3	4	0.493077	Ppup144960.1, Ppup144970.1, Ppup168300.1, Ppup168320.1
GO:0050996	BP	e	positive regulation of lipid catabolic process	4/2424	7/10157	0.060493	7	4	0.493077	Ppup011120.1, Ppup021300.1, Ppup025880.1, Ppup140980.1
GO:0150117	BP	e	positive regulation of cell-substrate junction organization	4/2424	7/10157	0.060493	6	4	0.493077	Ppup003910.1, Ppup027280.1, Ppup086470.1, Ppup146370.1
GO:0007465	BP	e	R7 cell fate commitment	4/2424	7/10157	0.060493	8	4	0.493077	Ppup086530.1, Ppup098070.1, Ppup117200.1, Ppup137670.1
GO:0045542	BP	e	positive regulation of cholesterol biosynthetic process	4/2424	7/10157	0.060493	10	4	0.493077	Ppup043200.1, Ppup104600.1, Ppup109420.1, Ppup109430.1
GO:0032649	BP	e	regulation of interferon-gamma production	4/2424	7/10157	0.060493	5	4	0.493077	Ppup035960.1, Ppup048850.1, Ppup058040.1, Ppup133840.1
GO:0045742	BP	e	positive regulation of epidermal growth factor receptor signaling pathway	4/2424	7/10157	0.060493	8	4	0.493077	Ppup092470.1, Ppup101280.1, Ppup162290.1, Ppup174910.1
GO:0006044	BP	e	N-acetylglucosamine metabolic process	4/2424	7/10157	0.060493	6	4	0.493077	Ppup069030.1, Ppup105580.1, Ppup108480.1, Ppup126240.1
GO:0007630	BP	e	jump response	4/2424	7/10157	0.060493	4	4	0.493077	Ppup010280.1, Ppup024570.1, Ppup137940.1, Ppup145930.1
GO:0006751	BP	e	glutathione catabolic process	4/2424	7/10157	0.060493	7	4	0.493077	Ppup022030.1, Ppup046080.1, Ppup160680.1, Ppup168100.1
GO:0010586	BP	e	miRNA metabolic process	4/2424	7/10157	0.060493	8	4	0.493077	Ppup086560.1, Ppup139070.1, Ppup139800.1, Ppup139980.1
GO:0000290	BP	e	deadenylation-dependent decapping of nuclear-transcribed mRNA	4/2424	7/10157	0.060493	10	4	0.493077	Ppup027520.1, Ppup031100.1, Ppup109030.1, Ppup174190.1
GO:0090205	BP	e	positive regulation of cholesterol metabolic process	4/2424	7/10157	0.060493	8	4	0.493077	Ppup043200.1, Ppup104600.1, Ppup109420.1, Ppup109430.1
GO:0015936	BP	e	coenzyme A metabolic process	4/2424	7/10157	0.060493	10	4	0.493077	Ppup002290.1, Ppup016890.1, Ppup104960.1, Ppup134900.1
GO:0034334	BP	e	adherens junction maintenance	4/2424	7/10157	0.060493	7	4	0.493077	Ppup041140.1, Ppup131550.1, Ppup135110.1, Ppup145860.1
GO:0016348	BP	e	imaginal disc-derived leg joint morphogenesis	4/2424	7/10157	0.060493	4	4	0.493077	Ppup017950.1, Ppup050680.1, Ppup092910.1, Ppup092930.1
GO:0071577	BP	e	zinc ion transmembrane transport	4/2424	7/10157	0.060493	9	4	0.493077	Ppup017880.1, Ppup021490.1, Ppup094310.1, Ppup126020.1
GO:0001654	BP	e	eye development	29/2424	89/10157	0.0605018	5	29	0.493077	Ppup007260.1, Ppup019930.1, Ppup024130.1, Ppup025760.1, Ppup049390.1, Ppup054390.1, Ppup058220.1, Ppup058840.1, Ppup063470.1, Ppup071370.1, Ppup074880.1, Ppup085360.1, Ppup085760.1, Ppup085820.1, Ppup092260.1, Ppup095370.1, Ppup103620.1, Ppup104710.1, Ppup110290.1, Ppup114920.1, Ppup115630.1, Ppup119540.1, Ppup122960.1, Ppup137460.1, Ppup144880.1, Ppup145290.1, Ppup151290.1, Ppup162080.1, Ppup174…
GO:0097193	BP	e	intrinsic apoptotic signaling pathway	15/2424	40/10157	0.0605209	6	15	0.493077	Ppup030870.1, Ppup037010.1, Ppup037560.1, Ppup048420.1, Ppup059860.1, Ppup076270.1, Ppup076280.1, Ppup093660.1, Ppup101240.1, Ppup125290.1, Ppup126130.1, Ppup127830.1, Ppup152000.1, Ppup160690.1, Ppup171880.1
GO:0051607	BP	e	defense response to virus	15/2424	40/10157	0.0605209	6	15	0.493077	Ppup010940.1, Ppup027200.1, Ppup027520.1, Ppup058840.1, Ppup082030.1, Ppup101240.1, Ppup106080.1, Ppup110010.1, Ppup116340.1, Ppup116770.1, Ppup117200.1, Ppup139070.1, Ppup139080.1, Ppup153110.1, Ppup161610.1
GO:0002376	BP	e	immune system process	116/2424	418/10157	0.0607263	1	116	0.494391	Ppup001870.1, Ppup002780.1, Ppup006950.1, Ppup007300.1, Ppup008030.1, Ppup008570.1, Ppup008760.1, Ppup009680.1, Ppup010940.1, Ppup011180.1, Ppup017930.1, Ppup018550.1, Ppup018590.1, Ppup019220.1, Ppup020730.1, Ppup021090.1, Ppup022170.1, Ppup025130.1, Ppup026000.1, Ppup026790.1, Ppup027200.1, Ppup027280.1, Ppup027520.1, Ppup030870.1, Ppup035960.1, Ppup036280.1, Ppup043610.1, Ppup048770.1, Ppup050…
GO:0006901	BP	e	vesicle coating	7/2424	15/10157	0.0616158	6	7	0.498005	Ppup003780.1, Ppup086720.1, Ppup099430.1, Ppup126130.1, Ppup145250.1, Ppup145260.1, Ppup146870.1
GO:0007316	BP	e	pole plasm RNA localization	7/2424	15/10157	0.0616158	4	7	0.498005	Ppup018070.1, Ppup027410.1, Ppup052220.1, Ppup085930.1, Ppup123910.1, Ppup140190.1, Ppup168280.1
GO:0032873	BP	e	negative regulation of stress-activated MAPK cascade	7/2424	15/10157	0.0616158	11	7	0.498005	Ppup054230.1, Ppup075720.1, Ppup096980.1, Ppup126790.1, Ppup145680.1, Ppup146370.1, Ppup162360.1
GO:0001676	BP	e	long-chain fatty acid metabolic process	7/2424	15/10157	0.0616158	8	7	0.498005	Ppup025880.1, Ppup101160.1, Ppup114020.1, Ppup114040.1, Ppup133780.1, Ppup144160.1, Ppup167340.1
GO:0007229	BP	e	integrin-mediated signaling pathway	7/2424	15/10157	0.0616158	6	7	0.498005	Ppup062600.1, Ppup086420.1, Ppup110670.1, Ppup112420.1, Ppup124670.1, Ppup125270.1, Ppup126130.1
GO:0019094	BP	e	pole plasm mRNA localization	7/2424	15/10157	0.0616158	7	7	0.498005	Ppup018070.1, Ppup027410.1, Ppup052220.1, Ppup085930.1, Ppup123910.1, Ppup140190.1, Ppup168280.1
GO:0070303	BP	e	negative regulation of stress-activated protein kinase signaling cascade	7/2424	15/10157	0.0616158	8	7	0.498005	Ppup054230.1, Ppup075720.1, Ppup096980.1, Ppup126790.1, Ppup145680.1, Ppup146370.1, Ppup162360.1
GO:0051058	BP	e	negative regulation of small GTPase mediated signal transduction	7/2424	15/10157	0.0616158	8	7	0.498005	Ppup005490.1, Ppup036980.1, Ppup057830.1, Ppup111590.1, Ppup114420.1, Ppup125780.1, Ppup126130.1
GO:0045621	BP	e	positive regulation of lymphocyte differentiation	7/2424	15/10157	0.0616158	8	7	0.498005	Ppup037880.1, Ppup048850.1, Ppup066020.1, Ppup069210.1, Ppup069390.1, Ppup109060.1, Ppup162360.1
GO:0006109	BP	e	regulation of carbohydrate metabolic process	17/2424	48/10157	0.0634641	5	17	0.50744	Ppup005470.1, Ppup026550.1, Ppup052760.1, Ppup075960.1, Ppup094070.1, Ppup095640.1, Ppup097870.1, Ppup103510.1, Ppup123340.1, Ppup125780.1, Ppup144280.1, Ppup145020.1, Ppup152710.1, Ppup160690.1, Ppup168410.1, Ppup171790.1, Ppup176270.1
GO:0000302	BP	e	response to reactive oxygen species	17/2424	48/10157	0.0634641	4	17	0.50744	Ppup004410.1, Ppup021780.1, Ppup037880.1, Ppup077510.1, Ppup101240.1, Ppup116890.1, Ppup120050.1, Ppup122720.1, Ppup123990.1, Ppup125290.1, Ppup137540.1, Ppup141550.1, Ppup144610.1, Ppup145680.1, Ppup149470.1, Ppup151000.1, Ppup152000.1
GO:0045859	BP	e	regulation of protein kinase activity	49/2424	163/10157	0.0641984	9	49	0.512109	Ppup005320.1, Ppup006720.1, Ppup013130.1, Ppup022170.1, Ppup027280.1, Ppup027810.1, Ppup028810.1, Ppup029910.1, Ppup030870.1, Ppup035940.1, Ppup036080.1, Ppup044130.1, Ppup044250.1, Ppup046070.1, Ppup053970.1, Ppup058670.1, Ppup062600.1, Ppup075760.1, Ppup077440.1, Ppup079920.1, Ppup082620.1, Ppup087280.1, Ppup090980.1, Ppup094070.1, Ppup095470.1, Ppup096980.1, Ppup101280.1, Ppup104490.1, Ppup109…
GO:1903362	BP	e	regulation of cellular protein catabolic process	30/2424	92/10157	0.0642049	7	30	0.512109	Ppup001710.1, Ppup004410.1, Ppup005320.1, Ppup008760.1, Ppup011260.1, Ppup020080.1, Ppup025910.1, Ppup029460.1, Ppup037330.1, Ppup037560.1, Ppup038210.1, Ppup046570.1, Ppup049010.1, Ppup050100.1, Ppup052760.1, Ppup057970.1, Ppup075920.1, Ppup076390.1, Ppup094610.1, Ppup095620.1, Ppup114460.1, Ppup117270.1, Ppup122830.1, Ppup127830.1, Ppup130220.1, Ppup140310.1, Ppup146570.1, Ppup160690.1, Ppup172…
GO:0050808	BP	e	synapse organization	33/2424	104/10157	0.0642312	5	33	0.512109	Ppup008830.1, Ppup009190.1, Ppup009830.1, Ppup010280.1, Ppup011220.1, Ppup024570.1, Ppup026370.1, Ppup027280.1, Ppup039380.1, Ppup055840.1, Ppup074880.1, Ppup086270.1, Ppup098040.1, Ppup101150.1, Ppup103270.1, Ppup103750.1, Ppup106710.1, Ppup108120.1, Ppup109360.1, Ppup110970.1, Ppup112480.1, Ppup114260.1, Ppup115170.1, Ppup124440.1, Ppup125740.1, Ppup133890.1, Ppup133960.1, Ppup137670.1, Ppup137…
GO:0002831	BP	e	regulation of response to biotic stimulus	41/2424	133/10157	0.0649793	4	41	0.512168	Ppup005470.1, Ppup008760.1, Ppup019220.1, Ppup020500.1, Ppup026660.1, Ppup027200.1, Ppup027500.1, Ppup027520.1, Ppup040010.1, Ppup050410.1, Ppup052950.1, Ppup052960.1, Ppup053150.1, Ppup053970.1, Ppup075330.1, Ppup075380.1, Ppup075580.1, Ppup075720.1, Ppup077400.1, Ppup082030.1, Ppup086710.1, Ppup090900.1, Ppup093050.1, Ppup095370.1, Ppup103750.1, Ppup106080.1, Ppup106190.1, Ppup112100.1, Ppup114…
GO:0008652	BP	e	cellular amino acid biosynthetic process	18/2424	50/10157	0.0651902	7	18	0.512168	Ppup010470.1, Ppup022030.1, Ppup028780.1, Ppup037640.1, Ppup052590.1, Ppup055840.1, Ppup085610.1, Ppup106210.1, Ppup115020.1, Ppup124830.1, Ppup125730.1, Ppup125740.1, Ppup131520.1, Ppup137610.1, Ppup143530.1, Ppup145850.1, Ppup156530.1, Ppup176440.1
GO:0006213	BP	e	pyrimidine nucleoside metabolic process	5/2424	10/10157	0.0654757	7	5	0.512168	Ppup028780.1, Ppup040180.1, Ppup075400.1, Ppup123120.1, Ppup124830.1
GO:0043949	BP	e	regulation of cAMP-mediated signaling	5/2424	10/10157	0.0654757	7	5	0.512168	Ppup005940.1, Ppup045860.1, Ppup081850.1, Ppup086710.1, Ppup123000.1
GO:0045103	BP	e	intermediate filament-based process	5/2424	10/10157	0.0654757	2	5	0.512168	Ppup008980.1, Ppup063440.1, Ppup112420.1, Ppup141930.1, Ppup151290.1
GO:1902402	BP	e	signal transduction involved in mitotic DNA damage checkpoint	5/2424	10/10157	0.0654757	9	5	0.512168	Ppup027520.1, Ppup093660.1, Ppup138980.1, Ppup141700.1, Ppup144760.1
GO:0007478	BP	e	leg disc morphogenesis	5/2424	10/10157	0.0654757	7	5	0.512168	Ppup008020.1, Ppup021200.1, Ppup045470.1, Ppup058840.1, Ppup069510.1
GO:0070498	BP	e	interleukin-1-mediated signaling pathway	5/2424	10/10157	0.0654757	7	5	0.512168	Ppup008760.1, Ppup048770.1, Ppup112100.1, Ppup114980.1, Ppup114990.1
GO:1990573	BP	e	potassium ion import across plasma membrane	5/2424	10/10157	0.0654757	9	5	0.512168	Ppup020100.1, Ppup063560.1, Ppup122620.1, Ppup127350.1, Ppup137940.1
GO:0033146	BP	e	regulation of intracellular estrogen receptor signaling pathway	5/2424	10/10157	0.0654757	7	5	0.512168	Ppup028340.1, Ppup035070.1, Ppup069060.1, Ppup141700.1, Ppup162290.1
GO:0006607	BP	e	NLS-bearing protein import into nucleus	5/2424	10/10157	0.0654757	10	5	0.512168	Ppup025920.1, Ppup102180.1, Ppup115210.1, Ppup120030.1, Ppup134690.1
GO:0034975	BP	e	protein folding in endoplasmic reticulum	5/2424	10/10157	0.0654757	3	5	0.512168	Ppup025820.1, Ppup059830.1, Ppup094800.1, Ppup103780.1, Ppup116770.1
GO:0045104	BP	e	intermediate filament cytoskeleton organization	5/2424	10/10157	0.0654757	6	5	0.512168	Ppup008980.1, Ppup063440.1, Ppup112420.1, Ppup141930.1, Ppup151290.1
GO:0099601	BP	e	regulation of neurotransmitter receptor activity	5/2424	10/10157	0.0654757	7	5	0.512168	Ppup004150.1, Ppup010280.1, Ppup098040.1, Ppup123810.1, Ppup146980.1
GO:0048146	BP	e	positive regulation of fibroblast proliferation	5/2424	10/10157	0.0654757	6	5	0.512168	Ppup036080.1, Ppup036980.1, Ppup037880.1, Ppup049480.1, Ppup082130.1
GO:0030513	BP	e	positive regulation of BMP signaling pathway	5/2424	10/10157	0.0654757	12	5	0.512168	Ppup058220.1, Ppup084930.1, Ppup097330.1, Ppup105580.1, Ppup111920.1
GO:0006896	BP	e	Golgi to vacuole transport	5/2424	10/10157	0.0654757	7	5	0.512168	Ppup003070.1, Ppup020500.1, Ppup035330.1, Ppup091320.1, Ppup130400.1
GO:0048935	BP	e	peripheral nervous system neuron development	5/2424	10/10157	0.0654757	5	5	0.512168	Ppup027200.1, Ppup053150.1, Ppup054060.1, Ppup086980.1, Ppup093050.1
GO:1900271	BP	e	regulation of long-term synaptic potentiation	5/2424	10/10157	0.0654757	8	5	0.512168	Ppup025100.1, Ppup048770.1, Ppup064880.1, Ppup098040.1, Ppup165290.1
GO:0042753	BP	e	positive regulation of circadian rhythm	5/2424	10/10157	0.0654757	4	5	0.512168	Ppup006990.1, Ppup008760.1, Ppup024510.1, Ppup026960.1, Ppup133780.1
GO:1903580	BP	e	positive regulation of ATP metabolic process	5/2424	10/10157	0.0654757	5	5	0.512168	Ppup123340.1, Ppup133270.1, Ppup160690.1, Ppup168410.1, Ppup171790.1
GO:0035307	BP	e	positive regulation of protein dephosphorylation	5/2424	10/10157	0.0654757	9	5	0.512168	Ppup004550.1, Ppup063210.1, Ppup099800.1, Ppup121540.1, Ppup140310.1
GO:1902403	BP	e	signal transduction involved in mitotic DNA integrity checkpoint	5/2424	10/10157	0.0654757	8	5	0.512168	Ppup027520.1, Ppup093660.1, Ppup138980.1, Ppup141700.1, Ppup144760.1
GO:0050729	BP	e	positive regulation of inflammatory response	5/2424	10/10157	0.0654757	7	5	0.512168	Ppup109060.1, Ppup120030.1, Ppup123000.1, Ppup160690.1, Ppup172340.1
GO:0033363	BP	e	secretory granule organization	5/2424	10/10157	0.0654757	6	5	0.512168	Ppup007260.1, Ppup050340.1, Ppup085140.1, Ppup130400.1, Ppup141930.1
GO:0006000	BP	e	fructose metabolic process	5/2424	10/10157	0.0654757	6	5	0.512168	Ppup009900.1, Ppup075960.1, Ppup092760.1, Ppup125780.1, Ppup152710.1
GO:0019363	BP	e	pyridine nucleotide biosynthetic process	5/2424	10/10157	0.0654757	9	5	0.512168	Ppup004480.1, Ppup009850.1, Ppup011470.1, Ppup124720.1, Ppup164350.1
GO:0001818	BP	e	negative regulation of cytokine production	15/2424	41/10157	0.065617	5	15	0.512197	Ppup005320.1, Ppup011120.1, Ppup019150.1, Ppup035800.1, Ppup035960.1, Ppup045480.1, Ppup086470.1, Ppup111590.1, Ppup112420.1, Ppup116890.1, Ppup126560.1, Ppup133890.1, Ppup140310.1, Ppup142110.1, Ppup162360.1
GO:0007560	BP	e	imaginal disc morphogenesis	15/2424	41/10157	0.065617	6	15	0.512197	Ppup008020.1, Ppup021200.1, Ppup025490.1, Ppup039090.1, Ppup042450.1, Ppup045470.1, Ppup058840.1, Ppup069510.1, Ppup099550.1, Ppup104710.1, Ppup123780.1, Ppup131840.1, Ppup137460.1, Ppup152740.1, Ppup166580.1
GO:0051865	BP	e	protein autoubiquitination	15/2424	41/10157	0.065617	10	15	0.512197	Ppup002900.1, Ppup004410.1, Ppup020080.1, Ppup039050.1, Ppup049390.1, Ppup059220.1, Ppup085820.1, Ppup092330.1, Ppup124080.1, Ppup138980.1, Ppup139800.1, Ppup146860.1, Ppup147030.1, Ppup166650.1, Ppup169820.1
GO:0008380	BP	e	RNA splicing	75/2424	261/10157	0.0658319	8	75	0.513516	Ppup001810.1, Ppup003970.1, Ppup005800.1, Ppup007300.1, Ppup009660.1, Ppup009680.1, Ppup010940.1, Ppup014110.1, Ppup016840.1, Ppup017570.1, Ppup023850.1, Ppup024270.1, Ppup026630.1, Ppup026830.1, Ppup027020.1, Ppup027070.1, Ppup027950.1, Ppup032990.1, Ppup035260.1, Ppup037010.1, Ppup039420.1, Ppup040060.1, Ppup046960.1, Ppup048280.1, Ppup053310.1, Ppup054470.1, Ppup059210.1, Ppup066020.1, Ppup069…
GO:2000134	BP	e	negative regulation of G1/S transition of mitotic cell cycle	11/2424	27/10157	0.0663674	9	11	0.516253	Ppup001720.1, Ppup003100.1, Ppup010940.1, Ppup027520.1, Ppup039090.1, Ppup046070.1, Ppup122630.1, Ppup138980.1, Ppup141010.1, Ppup141700.1, Ppup144760.1
GO:0048524	BP	e	positive regulation of viral process	11/2424	27/10157	0.0663674	5	11	0.516253	Ppup007260.1, Ppup027520.1, Ppup031510.1, Ppup040060.1, Ppup076900.1, Ppup107050.1, Ppup120030.1, Ppup125670.1, Ppup134690.1, Ppup138480.1, Ppup145020.1
GO:0008333	BP	e	endosome to lysosome transport	11/2424	27/10157	0.0663674	6	11	0.516253	Ppup019690.1, Ppup022310.1, Ppup029460.1, Ppup031510.1, Ppup082200.1, Ppup086320.1, Ppup112480.1, Ppup125670.1, Ppup126550.1, Ppup151270.1, Ppup164060.1
GO:1903037	BP	e	regulation of leukocyte cell-cell adhesion	11/2424	27/10157	0.0663674	6	11	0.516253	Ppup026790.1, Ppup037880.1, Ppup038890.1, Ppup048850.1, Ppup058040.1, Ppup069210.1, Ppup069390.1, Ppup109060.1, Ppup146370.1, Ppup153110.1, Ppup162360.1
GO:0048609	BP	e	multicellular organismal reproductive process	100/2424	357/10157	0.066655	2	100	0.517111	Ppup001870.1, Ppup007260.1, Ppup008680.1, Ppup015890.1, Ppup017930.1, Ppup017950.1, Ppup018070.1, Ppup018600.1, Ppup018870.1, Ppup019930.1, Ppup021300.1, Ppup022030.1, Ppup024270.1, Ppup026960.1, Ppup027050.1, Ppup027070.1, Ppup027410.1, Ppup027500.1, Ppup027680.1, Ppup027950.1, Ppup030870.1, Ppup031700.1, Ppup035260.1, Ppup035800.1, Ppup039560.1, Ppup045860.1, Ppup046880.1, Ppup052530.1, Ppup052…
GO:0045088	BP	e	regulation of innate immune response	23/2424	69/10157	0.0666607	6	23	0.517111	Ppup008760.1, Ppup019220.1, Ppup020500.1, Ppup026660.1, Ppup027200.1, Ppup027500.1, Ppup027520.1, Ppup040010.1, Ppup053970.1, Ppup075330.1, Ppup075380.1, Ppup075720.1, Ppup082030.1, Ppup106080.1, Ppup106190.1, Ppup112100.1, Ppup114980.1, Ppup114990.1, Ppup116340.1, Ppup122650.1, Ppup139130.1, Ppup151000.1, Ppup167510.1
GO:0045216	BP	e	cell-cell junction organization	23/2424	69/10157	0.0666607	5	23	0.517111	Ppup005970.1, Ppup041140.1, Ppup057830.1, Ppup083090.1, Ppup087280.1, Ppup101280.1, Ppup109360.1, Ppup123780.1, Ppup127350.1, Ppup131550.1, Ppup135110.1, Ppup137460.1, Ppup137940.1, Ppup139130.1, Ppup144610.1, Ppup145860.1, Ppup150640.1, Ppup151110.1, Ppup152740.1, Ppup160910.1, Ppup162370.1, Ppup166580.1, Ppup174910.1
GO:0051129	BP	e	negative regulation of cellular component organization	70/2424	242/10157	0.0668387	5	70	0.517111	Ppup004410.1, Ppup005490.1, Ppup009190.1, Ppup013930.1, Ppup020690.1, Ppup021180.1, Ppup021210.1, Ppup024160.1, Ppup025690.1, Ppup027280.1, Ppup027690.1, Ppup028360.1, Ppup035890.1, Ppup043440.1, Ppup043580.1, Ppup049720.1, Ppup057830.1, Ppup058370.1, Ppup059940.1, Ppup062320.1, Ppup062360.1, Ppup064250.1, Ppup064390.1, Ppup071370.1, Ppup075330.1, Ppup075380.1, Ppup075890.1, Ppup075920.1, Ppup077…
GO:0002521	BP	e	leukocyte differentiation	13/2424	34/10157	0.0669139	4	13	0.517111	Ppup026790.1, Ppup027280.1, Ppup052760.1, Ppup054230.1, Ppup082130.1, Ppup085360.1, Ppup091760.1, Ppup110880.1, Ppup122580.1, Ppup133840.1, Ppup140280.1, Ppup141910.1, Ppup144880.1
GO:0055067	BP	e	monovalent inorganic cation homeostasis	13/2424	34/10157	0.0669139	7	13	0.517111	Ppup004080.1, Ppup020100.1, Ppup021350.1, Ppup046850.1, Ppup064610.1, Ppup079800.1, Ppup083070.1, Ppup099860.1, Ppup122620.1, Ppup127350.1, Ppup137940.1, Ppup165050.1, Ppup171700.1
GO:0046164	BP	e	alcohol catabolic process	13/2424	34/10157	0.0669139	5	13	0.517111	Ppup006440.1, Ppup020690.1, Ppup047250.1, Ppup060140.1, Ppup094070.1, Ppup113500.1, Ppup122120.1, Ppup134680.1, Ppup136110.1, Ppup146750.1, Ppup157240.1, Ppup162270.1, Ppup163850.1
GO:0061912	BP	e	selective autophagy	9/2424	21/10157	0.0673686	6	9	0.517111	Ppup019820.1, Ppup048770.1, Ppup049570.1, Ppup053410.1, Ppup084770.1, Ppup116340.1, Ppup122830.1, Ppup126550.1, Ppup173600.1
GO:0090100	BP	e	positive regulation of transmembrane receptor protein serine/threonine kinase signaling pathway	9/2424	21/10157	0.0673686	7	9	0.517111	Ppup019150.1, Ppup030870.1, Ppup037560.1, Ppup057830.1, Ppup058220.1, Ppup084930.1, Ppup097330.1, Ppup105580.1, Ppup111920.1
GO:0045580	BP	e	regulation of T cell differentiation	9/2424	21/10157	0.0673686	8	9	0.517111	Ppup026790.1, Ppup037880.1, Ppup043580.1, Ppup048850.1, Ppup061630.1, Ppup069210.1, Ppup069390.1, Ppup109060.1, Ppup162360.1
GO:0099587	BP	e	inorganic ion import across plasma membrane	9/2424	21/10157	0.0673686	7	9	0.517111	Ppup020100.1, Ppup021490.1, Ppup063560.1, Ppup099860.1, Ppup109770.1, Ppup122620.1, Ppup127350.1, Ppup137940.1, Ppup165050.1
GO:1903051	BP	e	negative regulation of proteolysis involved in cellular protein catabolic process	9/2424	21/10157	0.0673686	9	9	0.517111	Ppup001710.1, Ppup011260.1, Ppup025910.1, Ppup037560.1, Ppup038210.1, Ppup046570.1, Ppup127830.1, Ppup130220.1, Ppup176270.1
GO:0042149	BP	e	cellular response to glucose starvation	9/2424	21/10157	0.0673686	7	9	0.517111	Ppup009730.1, Ppup016190.1, Ppup021150.1, Ppup028400.1, Ppup122880.1, Ppup126550.1, Ppup138770.1, Ppup149590.1, Ppup171790.1
GO:0030098	BP	e	lymphocyte differentiation	9/2424	21/10157	0.0673686	5	9	0.517111	Ppup026790.1, Ppup027280.1, Ppup054230.1, Ppup082130.1, Ppup091760.1, Ppup122580.1, Ppup133840.1, Ppup141910.1, Ppup144880.1
GO:0098659	BP	e	inorganic cation import across plasma membrane	9/2424	21/10157	0.0673686	8	9	0.517111	Ppup020100.1, Ppup021490.1, Ppup063560.1, Ppup099860.1, Ppup109770.1, Ppup122620.1, Ppup127350.1, Ppup137940.1, Ppup165050.1
GO:0035194	BP	e	posttranscriptional gene silencing by RNA	9/2424	21/10157	0.0673686	9	9	0.517111	Ppup021070.1, Ppup027520.1, Ppup050410.1, Ppup064000.1, Ppup086780.1, Ppup123330.1, Ppup139080.1, Ppup145500.1, Ppup154750.1
GO:0018393	BP	e	internal peptidyl-lysine acetylation	27/2424	82/10157	0.067403	10	27	0.517111	Ppup005470.1, Ppup008730.1, Ppup012980.1, Ppup014100.1, Ppup018690.1, Ppup019150.1, Ppup019460.1, Ppup019950.1, Ppup021480.1, Ppup022280.1, Ppup025950.1, Ppup028770.1, Ppup042410.1, Ppup043580.1, Ppup043600.1, Ppup050210.1, Ppup075420.1, Ppup084990.1, Ppup094820.1, Ppup101170.1, Ppup105670.1, Ppup127650.1, Ppup127830.1, Ppup140050.1, Ppup167520.1, Ppup174340.1, Ppup176270.1
GO:0071214	BP	e	cellular response to abiotic stimulus	27/2424	82/10157	0.067403	4	27	0.517111	Ppup002240.1, Ppup004450.1, Ppup005470.1, Ppup011260.1, Ppup019150.1, Ppup019460.1, Ppup025100.1, Ppup027810.1, Ppup030870.1, Ppup035800.1, Ppup039790.1, Ppup040660.1, Ppup062600.1, Ppup062660.1, Ppup065840.1, Ppup079870.1, Ppup082130.1, Ppup086470.1, Ppup091760.1, Ppup093660.1, Ppup101240.1, Ppup117200.1, Ppup122620.1, Ppup123000.1, Ppup132070.1, Ppup139870.1, Ppup144610.1
GO:0104004	BP	e	cellular response to environmental stimulus	27/2424	82/10157	0.067403	3	27	0.517111	Ppup002240.1, Ppup004450.1, Ppup005470.1, Ppup011260.1, Ppup019150.1, Ppup019460.1, Ppup025100.1, Ppup027810.1, Ppup030870.1, Ppup035800.1, Ppup039790.1, Ppup040660.1, Ppup062600.1, Ppup062660.1, Ppup065840.1, Ppup079870.1, Ppup082130.1, Ppup086470.1, Ppup091760.1, Ppup093660.1, Ppup101240.1, Ppup117200.1, Ppup122620.1, Ppup123000.1, Ppup132070.1, Ppup139870.1, Ppup144610.1
GO:0048639	BP	e	positive regulation of developmental growth	24/2424	71/10157	0.0678409	5	24	0.520114	Ppup008680.1, Ppup039090.1, Ppup040580.1, Ppup046770.1, Ppup048090.1, Ppup048850.1, Ppup048860.1, Ppup065950.1, Ppup074880.1, Ppup075410.1, Ppup077340.1, Ppup090610.1, Ppup090820.1, Ppup094460.1, Ppup109360.1, Ppup120140.1, Ppup126170.1, Ppup144880.1, Ppup145860.1, Ppup151000.1, Ppup153110.1, Ppup161200.1, Ppup167630.1, Ppup168760.1
GO:0031346	BP	e	positive regulation of cell projection organization	38/2424	122/10157	0.0685792	6	38	0.525413	Ppup006950.1, Ppup010280.1, Ppup018760.1, Ppup022170.1, Ppup024690.1, Ppup027500.1, Ppup030870.1, Ppup040760.1, Ppup042910.1, Ppup043580.1, Ppup046770.1, Ppup046970.1, Ppup048090.1, Ppup050970.1, Ppup052230.1, Ppup063440.1, Ppup064880.1, Ppup071370.1, Ppup075410.1, Ppup077340.1, Ppup082030.1, Ppup086470.1, Ppup087280.1, Ppup094530.1, Ppup095850.1, Ppup098040.1, Ppup120140.1, Ppup125290.1, Ppup131…
GO:0001817	BP	e	regulation of cytokine production	30/2424	94/10157	0.068879	4	30	0.527349	Ppup002780.1, Ppup005280.1, Ppup005320.1, Ppup011120.1, Ppup019150.1, Ppup021150.1, Ppup035800.1, Ppup035960.1, Ppup037880.1, Ppup045480.1, Ppup048850.1, Ppup058040.1, Ppup062600.1, Ppup082030.1, Ppup086470.1, Ppup106080.1, Ppup110010.1, Ppup111590.1, Ppup112420.1, Ppup116340.1, Ppup116890.1, Ppup120030.1, Ppup126560.1, Ppup133840.1, Ppup133890.1, Ppup135100.1, Ppup140310.1, Ppup142110.1, Ppup153…
GO:2000058	BP	e	regulation of ubiquitin-dependent protein catabolic process	21/2424	61/10157	0.0689518	9	21	0.527545	Ppup001710.1, Ppup004410.1, Ppup005320.1, Ppup011260.1, Ppup025910.1, Ppup037330.1, Ppup037560.1, Ppup046570.1, Ppup049010.1, Ppup050100.1, Ppup052760.1, Ppup075920.1, Ppup076390.1, Ppup094610.1, Ppup095620.1, Ppup114460.1, Ppup117270.1, Ppup122830.1, Ppup127830.1, Ppup140310.1, Ppup176270.1
GO:0018394	BP	e	peptidyl-lysine acetylation	27/2424	83/10157	0.070049	9	27	0.535573	Ppup005470.1, Ppup008730.1, Ppup012980.1, Ppup014100.1, Ppup018690.1, Ppup019150.1, Ppup019460.1, Ppup019950.1, Ppup021480.1, Ppup022280.1, Ppup025950.1, Ppup028770.1, Ppup042410.1, Ppup043580.1, Ppup043600.1, Ppup050210.1, Ppup075420.1, Ppup084990.1, Ppup094820.1, Ppup101170.1, Ppup105670.1, Ppup127650.1, Ppup127830.1, Ppup140050.1, Ppup167520.1, Ppup174340.1, Ppup176270.1
GO:0016197	BP	e	endosomal transport	38/2424	123/10157	0.0704989	5	38	0.538645	Ppup003070.1, Ppup021570.1, Ppup022310.1, Ppup027410.1, Ppup027870.1, Ppup029350.1, Ppup031510.1, Ppup035330.1, Ppup036920.1, Ppup040760.1, Ppup046560.1, Ppup048770.1, Ppup052220.1, Ppup053250.1, Ppup058670.1, Ppup075410.1, Ppup075470.1, Ppup076390.1, Ppup078950.1, Ppup086320.1, Ppup087090.1, Ppup091320.1, Ppup092450.1, Ppup093440.1, Ppup096440.1, Ppup097330.1, Ppup104480.1, Ppup104710.1, Ppup106…
GO:0030334	BP	e	regulation of cell migration	47/2424	155/10157	0.070558	6	47	0.538727	Ppup003170.1, Ppup003910.1, Ppup005490.1, Ppup012830.1, Ppup014250.1, Ppup018550.1, Ppup025700.1, Ppup026310.1, Ppup027810.1, Ppup036080.1, Ppup042450.1, Ppup042910.1, Ppup050970.1, Ppup052740.1, Ppup057310.1, Ppup057830.1, Ppup075410.1, Ppup075760.1, Ppup076820.1, Ppup077440.1, Ppup082260.1, Ppup085360.1, Ppup086420.1, Ppup086470.1, Ppup086710.1, Ppup087280.1, Ppup093070.1, Ppup093860.1, Ppup104…
GO:0098655	BP	e	cation transmembrane transport	43/2424	141/10157	0.0727657	6	43	0.55407	Ppup004420.1, Ppup006500.1, Ppup007780.1, Ppup017880.1, Ppup018310.1, Ppup020100.1, Ppup020860.1, Ppup021490.1, Ppup031630.1, Ppup052420.1, Ppup059950.1, Ppup060330.1, Ppup063560.1, Ppup065840.1, Ppup075450.1, Ppup085610.1, Ppup086960.1, Ppup092830.1, Ppup093570.1, Ppup094310.1, Ppup099860.1, Ppup101040.1, Ppup103150.1, Ppup109770.1, Ppup116510.1, Ppup122620.1, Ppup126020.1, Ppup126820.1, Ppup127…
GO:0032456	BP	e	endocytic recycling	11/2424	28/10157	0.0728285	6	11	0.554171	Ppup027410.1, Ppup027870.1, Ppup035330.1, Ppup036920.1, Ppup076390.1, Ppup078950.1, Ppup092450.1, Ppup093440.1, Ppup120280.1, Ppup130400.1, Ppup172340.1
GO:0072657	BP	e	protein localization to membrane	57/2424	193/10157	0.0729009	5	57	0.554345	Ppup003230.1, Ppup009830.1, Ppup010280.1, Ppup011220.1, Ppup022170.1, Ppup024560.1, Ppup026440.1, Ppup027410.1, Ppup035750.1, Ppup040260.1, Ppup048860.1, Ppup050700.1, Ppup058800.1, Ppup061560.1, Ppup061690.1, Ppup063290.1, Ppup063370.1, Ppup074160.1, Ppup075410.1, Ppup081800.1, Ppup082620.1, Ppup093240.1, Ppup093440.1, Ppup093840.1, Ppup094070.1, Ppup096660.1, Ppup098040.1, Ppup099500.1, Ppup099…
GO:0043271	BP	e	negative regulation of ion transport	18/2424	52/10157	0.0735556	6	18	0.558535	Ppup009830.1, Ppup022290.1, Ppup026440.1, Ppup027810.1, Ppup031750.1, Ppup037900.1, Ppup069270.1, Ppup071180.1, Ppup084230.1, Ppup090810.1, Ppup094070.1, Ppup103270.1, Ppup122830.1, Ppup133270.1, Ppup133960.1, Ppup137390.1, Ppup140860.1, Ppup149470.1
GO:0035303	BP	e	regulation of dephosphorylation	18/2424	52/10157	0.0735556	7	18	0.558535	Ppup004550.1, Ppup020690.1, Ppup027280.1, Ppup028400.1, Ppup041140.1, Ppup053660.1, Ppup063210.1, Ppup094070.1, Ppup099430.1, Ppup099800.1, Ppup101030.1, Ppup112100.1, Ppup119520.1, Ppup121540.1, Ppup122820.1, Ppup124900.1, Ppup140310.1, Ppup149470.1
GO:0007298	BP	e	border follicle cell migration	16/2424	44/10157	0.0738292	8	16	0.558535	Ppup011200.1, Ppup021210.1, Ppup048860.1, Ppup058840.1, Ppup075720.1, Ppup086980.1, Ppup097400.1, Ppup104330.1, Ppup110820.1, Ppup114050.1, Ppup117200.1, Ppup120340.1, Ppup135110.1, Ppup150900.1, Ppup169780.1, Ppup171780.1
GO:0043299	BP	e	leukocyte degranulation	16/2424	44/10157	0.0738292	8	16	0.558535	Ppup001870.1, Ppup043610.1, Ppup053510.1, Ppup082260.1, Ppup086420.1, Ppup091630.1, Ppup102180.1, Ppup116770.1, Ppup122120.1, Ppup124670.1, Ppup152050.1, Ppup166870.1, Ppup171660.1, Ppup172290.1, Ppup173320.1, Ppup173440.1
GO:0006661	BP	e	phosphatidylinositol biosynthetic process	13/2424	35/10157	0.0738388	8	13	0.558535	Ppup004450.1, Ppup006440.1, Ppup020690.1, Ppup027260.1, Ppup028400.1, Ppup040690.1, Ppup085530.1, Ppup123980.1, Ppup126400.1, Ppup131820.1, Ppup134680.1, Ppup141050.1, Ppup147010.1
GO:0061982	BP	e	meiosis I cell cycle process	13/2424	35/10157	0.0738388	4	13	0.558535	Ppup015890.1, Ppup018600.1, Ppup018870.1, Ppup021180.1, Ppup046070.1, Ppup048860.1, Ppup063850.1, Ppup083220.1, Ppup086990.1, Ppup095370.1, Ppup101280.1, Ppup154550.1, Ppup174480.1
GO:0120032	BP	e	regulation of plasma membrane bounded cell projection assembly	24/2424	73/10157	0.0739017	7	24	0.558535	Ppup005490.1, Ppup022170.1, Ppup024690.1, Ppup027500.1, Ppup046970.1, Ppup050970.1, Ppup052230.1, Ppup063440.1, Ppup071370.1, Ppup082030.1, Ppup084280.1, Ppup086470.1, Ppup087280.1, Ppup090820.1, Ppup095850.1, Ppup101150.1, Ppup101660.1, Ppup113560.1, Ppup122550.1, Ppup126790.1, Ppup133890.1, Ppup145980.1, Ppup150900.1, Ppup162360.1
GO:0060491	BP	e	regulation of cell projection assembly	24/2424	73/10157	0.0739017	6	24	0.558535	Ppup005490.1, Ppup022170.1, Ppup024690.1, Ppup027500.1, Ppup046970.1, Ppup050970.1, Ppup052230.1, Ppup063440.1, Ppup071370.1, Ppup082030.1, Ppup084280.1, Ppup086470.1, Ppup087280.1, Ppup090820.1, Ppup095850.1, Ppup101150.1, Ppup101660.1, Ppup113560.1, Ppup122550.1, Ppup126790.1, Ppup133890.1, Ppup145980.1, Ppup150900.1, Ppup162360.1
GO:0030111	BP	e	regulation of Wnt signaling pathway	31/2424	98/10157	0.0743503	6	31	0.561546	Ppup001710.1, Ppup005490.1, Ppup007690.1, Ppup008760.1, Ppup010900.1, Ppup011100.1, Ppup019690.1, Ppup024370.1, Ppup026960.1, Ppup030870.1, Ppup037330.1, Ppup083080.1, Ppup087280.1, Ppup095620.1, Ppup095740.1, Ppup096450.1, Ppup100660.1, Ppup105580.1, Ppup110290.1, Ppup111950.1, Ppup114980.1, Ppup114990.1, Ppup115380.1, Ppup122670.1, Ppup123220.1, Ppup124080.1, Ppup126130.1, Ppup127660.1, Ppup127…
GO:0023061	BP	e	signal release	28/2424	87/10157	0.0764901	6	28	0.573306	Ppup004180.1, Ppup005830.1, Ppup006950.1, Ppup007130.1, Ppup008830.1, Ppup010330.1, Ppup027680.1, Ppup048860.1, Ppup052260.1, Ppup054430.1, Ppup076820.1, Ppup085760.1, Ppup099520.1, Ppup106640.1, Ppup107790.1, Ppup108120.1, Ppup113230.1, Ppup123560.1, Ppup132870.1, Ppup135280.1, Ppup140050.1, Ppup144960.1, Ppup144970.1, Ppup149470.1, Ppup153110.1, Ppup165800.1, Ppup165850.1, Ppup170780.1
GO:0072332	BP	e	intrinsic apoptotic signaling pathway by p53 class mediator	7/2424	16/10157	0.0765672	7	7	0.573306	Ppup030870.1, Ppup037010.1, Ppup037560.1, Ppup059860.1, Ppup093660.1, Ppup127830.1, Ppup160690.1
GO:0007472	BP	e	wing disc morphogenesis	7/2424	16/10157	0.0765672	7	7	0.573306	Ppup025490.1, Ppup058840.1, Ppup099550.1, Ppup104710.1, Ppup123780.1, Ppup137460.1, Ppup152740.1
GO:2000059	BP	e	negative regulation of ubiquitin-dependent protein catabolic process	7/2424	16/10157	0.0765672	10	7	0.573306	Ppup001710.1, Ppup011260.1, Ppup025910.1, Ppup037560.1, Ppup046570.1, Ppup127830.1, Ppup176270.1
GO:1902930	BP	e	regulation of alcohol biosynthetic process	7/2424	16/10157	0.0765672	5	7	0.573306	Ppup043200.1, Ppup045850.1, Ppup102180.1, Ppup104600.1, Ppup109420.1, Ppup109430.1, Ppup126800.1
GO:0021987	BP	e	cerebral cortex development	7/2424	16/10157	0.0765672	3	7	0.573306	Ppup027280.1, Ppup083660.1, Ppup101240.1, Ppup113920.1, Ppup145860.1, Ppup156210.1, Ppup167830.1
GO:0001678	BP	e	cellular glucose homeostasis	7/2424	16/10157	0.0765672	7	7	0.573306	Ppup009900.1, Ppup026550.1, Ppup075380.1, Ppup124080.1, Ppup165290.1, Ppup171790.1, Ppup176270.1
GO:2000178	BP	e	negative regulation of neural precursor cell proliferation	7/2424	16/10157	0.0765672	6	7	0.573306	Ppup083090.1, Ppup095740.1, Ppup130440.1, Ppup137670.1, Ppup156210.1, Ppup166640.1, Ppup174120.1
GO:0070979	BP	e	protein K11-linked ubiquitination	7/2424	16/10157	0.0765672	11	7	0.573306	Ppup059220.1, Ppup079510.1, Ppup090640.1, Ppup097750.1, Ppup132520.1, Ppup137480.1, Ppup150740.1
GO:0031113	BP	e	regulation of microtubule polymerization	7/2424	16/10157	0.0765672	9	7	0.573306	Ppup077190.1, Ppup080260.1, Ppup086470.1, Ppup086510.1, Ppup106040.1, Ppup123810.1, Ppup140100.1
[truncated: 9,840 more rows]
