# Supplementary material for: Comprehensive isoform-level analysis reveals the contribution of alternative isoforms to venom evolution and repertoire diversity
Source: HighWire-hosted journal article supplement (doi:10.1101/gr.277707.123), 2023-09-01
Supplement: Supplemental_Tables_S1_to_S19.zip [file Supplemental_Table_S8.xlsx]

## Sheet: Sheet1
Supplemental Table S8. Genes with both differentially spliced and differentially expressed patterns.
eventid	events	Carcass-Venom_dPSI	Carcass-Venom_p-val	geneid	log2FoldChange	padj	Annotation
Ppup021150;SE:Scaffold_35:1732131-1732222:1732332-1732495:-	SE	1	0	Ppup021150	7.81771	8.4e-26	Eukaryotic translation initiation factor 2-alpha kinase 3
Ppup028060;AL:Scaffold_5:5466764-5466950:5467223:5466764-5468832:5468937:+	AL	0.960082	0.00457875	Ppup028060	2.60254	1.17e-132	Cystinosin homolog
Ppup028060;AF:Scaffold_5:5457928:5458126-5462515:5461735:5461948-5462515:+	AF	0.941707	0	Ppup028060	2.60254	1.17e-132	Cystinosin homolog
Ppup133780;AF:Scaffold_19:1862277-1864761:1865053:1862277-1867520:1868401:-	AF	0.938491	0	Ppup133780	2.07925	1.5e-158	Very long-chain-fatty-acid--CoA ligase bubblegum
Ppup133780;AF:Scaffold_19:1862277-1864761:1865053:1862277-1867520:1868022:-	AF	0.921462	0.001998	Ppup133780	2.07925	1.5e-158	Very long-chain-fatty-acid--CoA ligase bubblegum
Ppup064390_Ppup064360;SE:Scaffold_13:3438695-3441125:3441203-3443205:+	SE	0.919582	0	Ppup064390_Ppup064360	-2.74696	2.68e-20
Ppup133260;AF:Scaffold_19:1310077:1310192-1311030:1310475:1310797-1311030:+	AF	0.904087	0.00333	Ppup133260	4.17939	2.06e-165	Vacuole membrane protein 1
Ppup064740;AF:Scaffold_13:3983185-3988445:3989103:3983185-4039498:4039715:-	AF	0.903095	0.0164835	Ppup064740	-2.51949	4.41e-23	Putative uncharacterized protein
Ppup142950;AF:Scaffold_0:6670481:6671403-6705031:6696186:6696853-6705031:+	AF	0.892839	0	Ppup142950	2.33773	6.08e-159	Protein tramtrack, beta isoform
Ppup146280;RI:Scaffold_0:12235279:12235465-12237210:12237321:-	RI	0.883671	0	Ppup146280	-2.73784	9.19e-36	Protein LSM14 homolog B
Ppup028060;RI:Scaffold_5:5466662:5466764-5468832:5468937:+	RI	0.860166	0.00457875	Ppup028060	2.60254	1.17e-132	Cystinosin homolog
Ppup016850;AF:Scaffold_231:278221:278955-308028:307257:307557-308028:+	AF	0.837897	0.002997	Ppup016850	-2.72089	2.98e-19	Cerebellar degeneration-related protein 2-like
Ppup142720;RI:Scaffold_0:6243159:6243318-6243801:6245483:-	RI	0.830322	0.00824176	Ppup142720	2.81519	9.4e-133	Sentrin-specific protease 8
Ppup142950;AF:Scaffold_0:6671196:6671403-6705031:6696186:6696853-6705031:+	AF	0.814709	0	Ppup142950	2.33773	6.08e-159	Protein tramtrack, beta isoform
Ppup142720;A5:Scaffold_0:6243318-6243412:6243318-6243801:-	A5	0.807031	0.0014985	Ppup142720	2.81519	9.4e-133	Sentrin-specific protease 8
Ppup028060;AL:Scaffold_5:5466764-5466950:5467223:5466764-5467429:5468080:+	AL	0.796597	0.00457875	Ppup028060	2.60254	1.17e-132	Cystinosin homolog
Ppup092530;AF:Scaffold_8:2198689-2200794:2201098:2198689-2203609:2203675:-	AF	0.788828	0.00974026	Ppup092530	-2.20929	1.03e-19	Suppressor of kinetochore protein 1
Ppup081600;RI:Scaffold_17:81080:81605-81938:82050:+	RI	0.766404	0.023976	Ppup081600	11.9115	2.54e-34	Serine protease 55
Ppup109070;A3:Scaffold_260:307038-307369:307025-307369:-	A3	0.74857	0	Ppup109070	5.24017	3.74e-97	Fatty acyl-CoA reductase 1
Ppup133780;AF:Scaffold_19:1862277-1866244:1866383:1862277-1867520:1868401:-	AF	0.722168	0.001998	Ppup133780	2.07925	1.5e-158	Very long-chain-fatty-acid--CoA ligase bubblegum
Ppup028060;AL:Scaffold_5:5466764-5467429:5468080:5466764-5468832:5468937:+	AL	0.721014	0.00457875	Ppup028060	2.60254	1.17e-132	Cystinosin homolog
Ppup064740;AF:Scaffold_13:3983185-4032767:4033225:3983185-4039498:4039715:-	AF	0.703617	0.0164835	Ppup064740	-2.51949	4.41e-23	Putative uncharacterized protein
Ppup108120;AF:Scaffold_159:877870-879516:879807:877870-894224:894628:-	AF	0.700667	0.00599401	Ppup108120	4.20472	2.55e-119	Ras-related protein Rab-3
Ppup084440;AF:Scaffold_17:2657860:2658038-2661765:2658882:2659341-2661765:+	AF	0.696686	0.014985	Ppup084440	2.10558	8.79e-69	High affinity cAMP-specific and IBMX-insensitive 3',5'-cyclic phosphodiesterase 8
Ppup161780;A5:Scaffold_166:1027635-1027705:1027635-1027837:-	A5	0.688791	0	Ppup161780	2.05888	9.6e-128	Cordon-bleu protein-like 1
Ppup009870;RI:Scaffold_4:5839818:5842025-5842527:5843909:-	RI	0.687479	0.00849151	Ppup009870	3.26555	7.29e-83	Putative uncharacterized protein
Ppup045890_Ppup045860;AF:Scaffold_1:5207304-5211151:5211225:5207304-5245395:5246416:-	AF	0.680121	0.0227273	Ppup045890_Ppup045860	-2.59613	2.39e-17
Ppup146620;AF:Scaffold_0:12794250-12797795:12798084:12794250-12804128:12804352:-	AF	0.679541	0	Ppup146620	2.51701	2.2e-107	Putative uncharacterized protein
Ppup141990;MX:Scaffold_0:4974221-5003034:5003539-5082458:4974221-5041870:5042099-5082458:+	MX	0.670078	0.0472028	Ppup141990	4.19247	0	Putative uncharacterized protein
Ppup133780;AF:Scaffold_19:1862277-1864761:1865053:1862277-1866244:1866383:-	AF	0.667647	0.003885	Ppup133780	2.07925	1.5e-158	Very long-chain-fatty-acid--CoA ligase bubblegum
Ppup146280;A5:Scaffold_0:12235465-12237027:12235465-12237210:-	A5	0.666129	0	Ppup146280	-2.73784	9.19e-36	Protein LSM14 homolog B
Ppup140770;AL:Scaffold_0:3412296-3425377:3425626:3412296-3426218:3426535:+	AL	0.665564	0	Ppup140770	2.26518	8.12e-56	Serpin B8
novelGeneAS085;RI:Scaffold_2:1697634:1697709-1698273:1698630:+	RI	0.662132	0.0014985	novelGeneAS085	7.91135	0
Ppup099860;A3:Scaffold_285:416929-454990:416920-454990:-	A3	0.653316	0.0254745	Ppup099860	-2.58361	2.15e-22	Sodium/calcium exchanger 1
Ppup092530;AF:Scaffold_8:2198689-2200794:2201101:2198689-2203609:2203675:-	AF	0.651984	0.0114885	Ppup092530	-2.20929	1.03e-19	Suppressor of kinetochore protein 1
Ppup137260;AF:Scaffold_53:174116-216184:217057:174116-222464:223110:-	AF	0.649001	0.00799201	Ppup137260	2.82518	7.97e-50	Putative uncharacterized protein
Ppup093070;RI:Scaffold_8:2948520:2950118-2950284:2950334:-	RI	0.648526	0.00699301	Ppup093070	2.45671	2.65e-48	IQ motif and SEC7 domain-containing protein 1
Ppup043480;SE:Scaffold_1:548614-550045:550134-551941:+	SE	0.644742	0.026973	Ppup043480	-2.29918	1.5e-06	Putative uncharacterized protein
Ppup133960;RI:Scaffold_19:2072848:2072899-2074808:2075259:+	RI	0.632542	0.0314685	Ppup133960	2.17632	1.56e-75	Ankyrin-3
Ppup166520;AF:Scaffold_25:1506087-1508839:1509020:1506087-1512569:1513008:-	AF	0.623087	0.0142358	Ppup166520	-2.06962	3.29e-20	Serine/threonine-protein phosphatase 6 regulatory ankyrin repeat subunit A
Ppup028060;AF:Scaffold_5:5457928:5458013-5462515:5461735:5461948-5462515:+	AF	0.615272	0.00457875	Ppup028060	2.60254	1.17e-132	Cystinosin homolog
Ppup019220;RI:Scaffold_28:2346072:2346343-2346430:2346499:+	RI	0.615165	0.00899101	Ppup019220	10.9497	1.49e-31	Beta-1,3-glucan-binding protein
Ppup009450;RI:Scaffold_4:5282557:5285068-5285185:5285508:+	RI	0.612834	0.0104895	Ppup009450	-2.78212	0.00916411	Putative uncharacterized protein
Ppup055610;SE:Scaffold_45:83806-84655:85053-85622:-	SE	0.609151	0.0104895	Ppup055610	2.6276	7.31e-91	Tensin
Ppup063140;A5:Scaffold_13:2129399-2141186:2129399-2141389:-	A5	0.607092	0.035964	Ppup063140	2.37376	5.41e-119	Serine proteinase stubble
Ppup045890_Ppup045860;SE:Scaffold_1:5058219-5071959:5071991-5074632:-	SE	0.602073	0.0227273	Ppup045890_Ppup045860	-2.59613	2.39e-17
Ppup092530;RI:Scaffold_8:2198259:2198513-2198594:2198689:-	RI	0.598721	0.00974026	Ppup092530	-2.20929	1.03e-19	Suppressor of kinetochore protein 1
Ppup092220;AF:Scaffold_8:1912671-1913193:1913448:1912671-1913892:1913984:-	AF	0.596376	0	Ppup092220	3.86882	2.36e-57	Putative uncharacterized protein
Ppup028060;RI:Scaffold_5:5466662:5466764-5467429:5468080:+	RI	0.587647	0.00824176	Ppup028060	2.60254	1.17e-132	Cystinosin homolog
Ppup049670_Ppup049680;AF:Scaffold_21:2082832:2082988-2086486:2083294:2083452-2086486:+	AF	0.584867	0	Ppup049670_Ppup049680	10.4421	0
Ppup017700;AL:Scaffold_28:252901-253541:253687:252901-255801:256233:+	AL	0.571101	0.011322	Ppup017700	-2.5179	4.8e-05	Troponin I
Ppup029850;A3:Scaffold_111:9318-9393:9292-9393:-	A3	0.558924	0.00599401	Ppup029850	8.19526	0	Putative uncharacterized protein
Ppup140770;AL:Scaffold_0:3412296-3425377:3425626:3412296-3426218:3426665:+	AL	0.556202	0	Ppup140770	2.26518	8.12e-56	Serpin B8
Ppup091990;AF:Scaffold_8:1837270:1837319-1839006:1838185:1838457-1839006:+	AF	0.530769	0.00749251	Ppup091990	-5.25742	1.08e-07	Rac GTPase-activating protein 1
Ppup131490;A5:Scaffold_18:1994802-1995366:1994802-1995372:-	A5	0.529315	0.017982	Ppup131490	-4.35905	7.62e-45	Outer dense fiber protein 3-B
Ppup131490;SE:Scaffold_18:1992642-1993366:1993467-1993723:-	SE	0.529315	0.017982	Ppup131490	-4.35905	7.62e-45	Outer dense fiber protein 3-B
Ppup146620;AF:Scaffold_0:12794250-12797795:12798084:12794250-12804128:12804569:-	AF	0.522324	0	Ppup146620	2.51701	2.2e-107	Putative uncharacterized protein
Ppup095660;AF:Scaffold_8:5359288:5359526-5361946:5360730:5361037-5361946:+	AF	0.515054	0.0114885	Ppup095660	-2.66759	5.12e-05	Serine protease snake
Ppup133260;RI:Scaffold_19:1310475:1310797-1311030:1311362:+	RI	0.507237	0.0262238	Ppup133260	4.17939	2.06e-165	Vacuole membrane protein 1
Ppup122880;RI:Scaffold_3:1101554:1101630-1102508:1102826:+	RI	0.50187	0.016983	Ppup122880	5.01797	1.51e-293	PRKCA-binding protein
Ppup140770;AL:Scaffold_0:3412296-3416586:3418205:3412296-3423553:3424249:+	AL	0.5005	0.0471861	Ppup140770	2.26518	8.12e-56	Serpin B8
Ppup017700;MX:Scaffold_28:244364-245066:245166-252624:244364-247256:247356-252624:+	MX	0.499491	0.011322	Ppup017700	-2.5179	4.8e-05	Troponin I
novelGenePB.2583;AF:Scaffold_6:3027597:3027755-3033032:3028993:3029164-3033032:+	AF	0.498976	0	novelGenePB.2583	5.21067	1.47e-252
Ppup140770;AL:Scaffold_0:3412296-3425377:3425882:3412296-3426218:3426535:+	AL	0.498707	0	Ppup140770	2.26518	8.12e-56	Serpin B8
Ppup133960;RI:Scaffold_19:2073410:2073640-2074808:2075337:+	RI	0.498068	0.0314685	Ppup133960	2.17632	1.56e-75	Ankyrin-3
Ppup056870;AF:Scaffold_553:53988-132546:132799:53988-319061:319335:-	AF	0.495518	0.041958	Ppup056870	-4.40377	4.68e-49	Putative uncharacterized protein
Ppup140770;AL:Scaffold_0:3412296-3414421:3416321:3412296-3421381:3421655:+	AL	0.491861	0	Ppup140770	2.26518	8.12e-56	Serpin B8
novelGeneMSTRG.3109;A3:Scaffold_17:1265757-1265850:1265577-1265850:-	A3	0.490615	0.016983	novelGeneMSTRG.3109	3.10874	3.5e-16
Ppup107440;A3:Scaffold_158:563772-563865:563737-563865:-	A3	0.48961	0.0499501	Ppup107440	4.94368	8.9e-53	Putative uncharacterized protein
Ppup008030_Ppup008570;AF:Scaffold_4:3447458:3447612-3451112:3448933:3449164-3451112:+	AF	0.488977	0.00899101	Ppup008030_Ppup008570	-2.33757	5.14e-16
Ppup116570;A3:Scaffold_50:67794-70464:67462-70464:-	A3	0.484766	0.001998	Ppup116570	2.39653	1.19e-70	Vesicular glutamate transporter 2
Ppup137940;AF:Scaffold_53:1650450-1672446:1672509:1650450-1674500:1674586:-	AF	0.483633	0.00499501	Ppup137940	-2.34366	7.5e-23	Sodium/potassium-transporting ATPase subunit alpha
novelGenePB.731;RI:Scaffold_1:2679775:2680179-2680277:2682558:+	RI	0.481928	0.010989	novelGenePB.731	-2.27802	6.63e-36
Ppup140770;AL:Scaffold_0:3412296-3414421:3414670:3412296-3421381:3421655:+	AL	0.478981	0	Ppup140770	2.26518	8.12e-56	Serpin B8
Ppup133960;A3:Scaffold_19:2072899-2073410:2072899-2074808:+	A3	0.477644	0.0314685	Ppup133960	2.17632	1.56e-75	Ankyrin-3
Ppup130520_Ppup130510;SE:Scaffold_150:835456-835919:835948-837069:+	SE	0.476234	0.00224775	Ppup130520_Ppup130510	-2.49668	3.9e-18
Ppup134010;AF:Scaffold_19:2151510-2151674:2155653:2151510-2156238:2156929:-	AF	0.47398	0.00899101	Ppup134010	5.4474	1e-280	Coronin-2B
Ppup023000;RI:Scaffold_404:36055:36652-36859:37199:-	RI	0.473313	0.00749251	Ppup023000	2.29673	3.69e-133	DDB1- and CUL4-associated factor 5
Ppup096580;AF:Scaffold_103:406467:406722-433733:428889:429319-433733:+	AF	0.464952	0.037962	Ppup096580	-4.49535	1.38e-06	Carcinine transporter
Ppup135110;SE:Scaffold_19:3804366-3812187:3812288-3814951:-	SE	0.463679	0	Ppup135110	-2.25109	1.02e-115	Dynamin
Ppup127340;RI:Scaffold_3:6711153:6711436-6712058:6712556:+	RI	0.462621	0.0460789	Ppup127340	-3.1515	1.12e-117	Zinc finger CCHC domain-containing protein 2
Ppup140770;AL:Scaffold_0:3412296-3425377:3425882:3412296-3426218:3426665:+	AL	0.446974	0.00907426	Ppup140770	2.26518	8.12e-56	Serpin B8
Ppup016850;AF:Scaffold_231:278282:278955-308028:307257:307557-308028:+	AF	0.436146	0.011988	Ppup016850	-2.72089	2.98e-19	Cerebellar degeneration-related protein 2-like
Ppup163530;A5:Scaffold_180:307635-314377:307635-314958:-	A5	0.435769	0.0324675	Ppup163530	7.35557	0	Putative uncharacterized protein
Ppup001870;AF:Scaffold_247:309330-311236:311295:309330-320270:320712:-	AF	0.43419	0.032967	Ppup001870	-3.32554	3.43e-22	Beta-hexosaminidase subunit beta
Ppup109070;AF:Scaffold_260:308883-309172:309422:308883-309833:310106:-	AF	0.426174	0.000499501	Ppup109070	5.24017	3.74e-97	Fatty acyl-CoA reductase 1
Ppup133780;AF:Scaffold_19:1862277-1864761:1865053:1862277-1867520:1867828:-	AF	0.423094	0.00174825	Ppup133780	2.07925	1.5e-158	Very long-chain-fatty-acid--CoA ligase bubblegum
Ppup134010;AF:Scaffold_19:2151510-2154756:2155079:2151510-2156238:2156929:-	AF	0.41728	0.00899101	Ppup134010	5.4474	1e-280	Coronin-2B
Ppup146750;A3:Scaffold_0:12900289-12900356:12900289-12900365:+	A3	0.416837	0.016983	Ppup146750	-2.96632	2.07e-124	Sulfotransferase 1C4
Ppup005210;A5:Scaffold_427:6572-9644:6426-9644:+	A5	0.404265	0.021978	Ppup005210	4.76674	2.61e-142	Apyrase
Ppup134010;AF:Scaffold_19:2151510-2155429:2155653:2151510-2156238:2156929:-	AF	0.40143	0.011988	Ppup134010	5.4474	1e-280	Coronin-2B
Ppup045990;A5:Scaffold_1:5690584-5691020:5690584-5691021:-	A5	0.399821	0.040959	Ppup045990	-2.5032	5.4e-20	Stearoyl-CoA desaturase 5
Ppup151370;A3:Scaffold_219:827365-827434:827365-827449:+	A3	0.395628	0.036963	Ppup151370	-4.89471	2.89e-25	E3 ubiquitin-protein ligase siah-1
Ppup098220;AF:Scaffold_118:1127143:1127305-1139093:1129694:1129818-1139093:+	AF	0.394092	0.003996	Ppup098220	3.93078	2.42e-109	Tetraspanin-9
Ppup140770;AL:Scaffold_0:3412296-3417683:3418002:3412296-3421381:3421655:+	AL	0.378653	0	Ppup140770	2.26518	8.12e-56	Serpin B8
Ppup116730;SE:Scaffold_50:316012-316198:316287-317179:+	SE	0.375021	0.00549451	Ppup116730	2.60787	1.21e-49	Putative uncharacterized protein
Ppup113230;A3:Scaffold_2:5168643-5169011:5168643-5169044:+	A3	0.371423	0.00374625	Ppup113230	2.40709	2.89e-15	Synaptotagmin 1
Ppup111240;RI:Scaffold_2:2207032:2207218-2207878:2207988:-	RI	0.369169	0.01998	Ppup111240	2.45791	8.99e-226	Tyrosine kinase receptor Cad96Ca
Ppup044030;AF:Scaffold_1:1640278-1641909:1641959:1640278-1674730:1675361:-	AF	0.366723	0	Ppup044030	2.51231	0	Plexin domain-containing protein 2
Ppup055610;SE:Scaffold_45:83806-84421:85053-85622:-	SE	0.366279	0.0104895	Ppup055610	2.6276	7.31e-91	Tensin
Ppup005310_Ppup005300;RI:Scaffold_427:62285:62376-63364:63761:-	RI	0.363037	0.0262238	Ppup005310_Ppup005300	2.23408	1.41e-145
novelGeneMSTRG.8652;A3:Scaffold_403:10739-10811:10739-10861:+	A3	0.343076	0.014985	novelGeneMSTRG.8652	5.05643	0
Ppup122880;RI:Scaffold_3:1101554:1102067-1102508:1102826:+	RI	0.342277	0.016983	Ppup122880	5.01797	1.51e-293	PRKCA-binding protein
Ppup094310;AF:Scaffold_8:4092841-4094036:4094318:4092841-4097991:4098228:-	AF	0.341858	0.0024975	Ppup094310	6.72028	0	Zinc transporter ZIP3
Ppup130940;RI:Scaffold_18:690448:690782-691349:691809:+	RI	0.341041	0.032967	Ppup130940	6.90719	1.6e-286	Putative uncharacterized protein
Ppup057710;A5:Scaffold_6:672498-672565:672475-672565:+	A5	0.333252	0.0134865	Ppup057710	7.54327	1.66e-163	Putative uncharacterized protein
Ppup124350;RI:Scaffold_3:3215560:3216145-3216204:3216970:+	RI	0.332943	0.00999001	Ppup124350	9.33113	0	Transcription factor LBX1
novelGenePB.3969;A3:Scaffold_17:213959-214223:213932-214223:-	A3	0.331148	0.035964	novelGenePB.3969	11.0936	4.46e-49
Ppup003890;AF:Scaffold_26:2520986:2521074-2522526:2521261:2521453-2522526:+	AF	0.33003	0.0499501	Ppup003890	-2.15965	3.51e-10	Putative uncharacterized protein
Ppup017700;AL:Scaffold_28:252901-253541:253687:252901-255801:256416:+	AL	0.32927	0.0183983	Ppup017700	-2.5179	4.8e-05	Troponin I
Ppup117040;A5:Scaffold_50:781862-784692:781604-784692:+	A5	0.32835	0.0014985	Ppup117040	2.95079	1.79e-64	RNA-binding protein 38
Ppup043010;RI:Scaffold_1:69616:69720-69817:70024:+	RI	0.328308	0.00949051	Ppup043010	11.2578	4.76e-30	Adenosine deaminase 2
Ppup136900;A3:Scaffold_33:993583-1006948:993508-1006948:-	A3	0.326892	0.025308	Ppup136900	11.1676	5.67e-120	Venom acid phosphatase Acph-1
Ppup117110;A3:Scaffold_50:903594-903724:903582-903724:-	A3	0.322127	0.0034965	Ppup117110	11.8283	2.32e-36	Lipase 1
Ppup137980;A5:Scaffold_53:1734774-1735486:1734774-1735521:-	A5	0.315762	0.015984	Ppup137980	2.47519	6.3e-44	Epididymal secretory protein E1
Ppup131520;AF:Scaffold_18:2019400-2019490:2020274:2019400-2020440:2021042:-	AF	0.31534	0.0164835	Ppup131520	-2.6047	3.81e-54	Branched-chain-amino-acid aminotransferase
Ppup028060;AF:Scaffold_5:5457928:5458126-5462515:5461487:5461948-5462515:+	AF	0.309756	0.037851	Ppup028060	2.60254	1.17e-132	Cystinosin homolog
Ppup122880;A5:Scaffold_3:1102067-1102508:1101630-1102508:+	A5	0.309669	0.02331	Ppup122880	5.01797	1.51e-293	PRKCA-binding protein
Ppup127340;AF:Scaffold_3:6709142:6710005-6712058:6711153:6711436-6712058:+	AF	0.305739	0.0460789	Ppup127340	-3.1515	1.12e-117	Zinc finger CCHC domain-containing protein 2
Ppup141990;SE:Scaffold_0:5003539-5056071:5056126-5082458:+	SE	0.304933	0.0472028	Ppup141990	4.19247	0	Putative uncharacterized protein
Ppup130940;A5:Scaffold_18:691272-691349:690782-691349:+	A5	0.304616	0.0427073	Ppup130940	6.90719	1.6e-286	Putative uncharacterized protein
Ppup125740;AF:Scaffold_3:4792791:4792960-4801093:4798034:4798546-4801093:+	AF	0.301492	0.00699301	Ppup125740	-2.77074	3.5e-20	Glutamine synthetase 2 cytoplasmic
Ppup084440;AF:Scaffold_17:2657860:2658191-2661765:2658882:2659341-2661765:+	AF	0.296044	0.023976	Ppup084440	2.10558	8.79e-69	High affinity cAMP-specific and IBMX-insensitive 3',5'-cyclic phosphodiesterase 8
Ppup125760;AF:Scaffold_3:4805769:4806077-4808788:4807293:4807526-4808788:+	AF	0.294438	0.000999001	Ppup125760	-2.81883	4.21e-70	UTP--glucose-1-phosphate uridylyltransferase
Ppup064680;RI:Scaffold_13:3869874:3869972-3873084:3873178:-	RI	0.293308	0.012987	Ppup064680	2.23447	5.93e-66	Putative RNA-binding protein Luc7-like 2
Ppup140770;AL:Scaffold_0:3412296-3414421:3414670:3412296-3419324:3419734:+	AL	0.29309	0.0278559	Ppup140770	2.26518	8.12e-56	Serpin B8
Ppup010230;AF:Scaffold_4:6318159-6318290:6318420:6318159-6318682:6319067:-	AF	0.28849	0.0274725	Ppup010230	-2.76833	3.15e-91	Probable multidrug resistance-associated protein lethal(2)03659
novelGenePB.5711;SE:Scaffold_33:406753-407813:407875-409659:-	SE	0.285443	0.014985	novelGenePB.5711	2.76998	1.7e-240
Ppup122410;SE:Scaffold_3:603689-603878:603961-604047:+	SE	0.285196	0.040959	Ppup122410	-4.43864	4.41e-61	Rho GTPase-activating protein 11A
Ppup020900;A5:Scaffold_35:1410453-1410531:1410453-1412373:-	A5	0.284914	0.0337995	Ppup020900	4.03787	0	Putative uncharacterized protein
Ppup146980;AF:Scaffold_0:13291292-13291659:13291803:13291292-13292034:13292252:-	AF	0.282397	0.00899101	Ppup146980	6.38234	2.88e-214	Corticotropin-releasing factor-binding protein
Ppup001840;A3:Scaffold_247:269452-269699:269452-269718:+	A3	0.281031	0.00799201	Ppup001840	12.0704	5.16e-84	Putative uncharacterized protein
Ppup140770;AL:Scaffold_0:3412296-3414421:3416321:3412296-3419324:3419734:+	AL	0.27617	0.014715	Ppup140770	2.26518	8.12e-56	Serpin B8
Ppup146280;A5:Scaffold_0:12235465-12237027:12235465-12237132:-	A5	0.274164	0.0014985	Ppup146280	-2.73784	9.19e-36	Protein LSM14 homolog B
Ppup119410;AF:Scaffold_16:413570:413761-420138:419426:419498-420138:+	AF	0.272093	0.017982	Ppup119410	3.4047	2.24e-102	Putative uncharacterized protein
Ppup028060;A5:Scaffold_5:5458126-5462515:5458013-5462515:+	A5	0.267451	0.00824176	Ppup028060	2.60254	1.17e-132	Cystinosin homolog
Ppup017700;AL:Scaffold_28:252901-253541:253959:252901-255801:256233:+	AL	0.265108	0.011322	Ppup017700	-2.5179	4.8e-05	Troponin I
Ppup008030_Ppup008420;AL:Scaffold_4:3456545-3681551:3682149:3456545-3682353:3682639:+	AL	0.263613	0.027972	Ppup008030_Ppup008420	-2.30534	1.24e-28
Ppup140770;AL:Scaffold_0:3412296-3416586:3418205:3412296-3419324:3419734:+	AL	0.258667	0.0474203	Ppup140770	2.26518	8.12e-56	Serpin B8
Ppup081600;A5:Scaffold_17:76205-76537:76183-76537:+	A5	0.253034	0.00799201	Ppup081600	11.9115	2.54e-34	Serine protease 55
Ppup140320;AF:Scaffold_0:2636970:2637095-2637868:2637364:2637467-2637868:+	AF	0.250817	0.024975	Ppup140320	2.04098	1.72e-119	Annexin B11
Ppup140770;AL:Scaffold_0:3412296-3418230:3418551:3412296-3421381:3421655:+	AL	0.247085	0.0265588	Ppup140770	2.26518	8.12e-56	Serpin B8
Ppup017700;AL:Scaffold_28:252901-253541:253959:252901-255801:256416:+	AL	0.244318	0.0127373	Ppup017700	-2.5179	4.8e-05	Troponin I
Ppup133780;AF:Scaffold_19:1862277-1866244:1866383:1862277-1867520:1867828:-	AF	0.237562	0.001998	Ppup133780	2.07925	1.5e-158	Very long-chain-fatty-acid--CoA ligase bubblegum
Ppup140770;AL:Scaffold_0:3412296-3414421:3414670:3412296-3420857:3421181:+	AL	0.237367	0.0384322	Ppup140770	2.26518	8.12e-56	Serpin B8
Ppup172430;RI:Scaffold_7:661782:661856-662997:663405:+	RI	0.234949	0.00699301	Ppup172430	2.54289	1.15e-73	Fibropellin-1
Ppup140770;AL:Scaffold_0:3412296-3417683:3418551:3412296-3421381:3421655:+	AL	0.234644	0.0384322	Ppup140770	2.26518	8.12e-56	Serpin B8
Ppup005310_Ppup005300;RI:Scaffold_427:62285:62376-62834:63761:-	RI	0.226879	0.0262238	Ppup005310_Ppup005300	2.23408	1.41e-145
Ppup140770;AL:Scaffold_0:3412296-3414421:3416321:3412296-3420857:3421181:+	AL	0.22638	0.0338772	Ppup140770	2.26518	8.12e-56	Serpin B8
novelGeneMSTRG.3109;RI:Scaffold_17:1265850:1265932-1266163:1267380:-	RI	0.222877	0.0434565	novelGeneMSTRG.3109	3.10874	3.5e-16
Ppup005310_Ppup005300;A3:Scaffold_427:64457-75362:64454-75362:-	A3	0.218756	0.0262238	Ppup005310_Ppup005300	2.23408	1.41e-145
Ppup119410;RI:Scaffold_16:419426:419498-420138:420599:+	RI	0.216963	0.018981	Ppup119410	3.4047	2.24e-102	Putative uncharacterized protein
novelGenePB.5711;MX:Scaffold_33:410282-413071:413177-418082:410282-414003:414148-418082:-	MX	0.216256	0.014985	novelGenePB.5711	2.76998	1.7e-240
Ppup086720;AF:Scaffold_186:506725:506872-507813:507267:507399-507813:+	AF	0.210936	0.0454545	Ppup086720	2.30741	4.03e-61	Protein transport protein Sec24C
Ppup070660;RI:Scaffold_30:559557:559978-560058:560633:-	RI	0.209992	0.0104895	Ppup070660	4.66614	0	Pancreatic lipase-related protein 2
Ppup075890;AF:Scaffold_101:879601-881054:881683:879601-885771:886517:-	AF	0.208894	0.015984	Ppup075890	2.70457	5.37e-72	Ephexin-1
Ppup046230;SE:Scaffold_1:6139342-6139645:6139689-6139965:+	SE	0.199481	0.0484515	Ppup046230	2.22784	2.04e-88	Glucose-6-phosphate exchanger SLC37A2
Ppup064680;SE:Scaffold_13:3869972-3870457:3872648-3873084:-	SE	0.19781	0.047619	Ppup064680	2.23447	5.93e-66	Putative RNA-binding protein Luc7-like 2
Ppup161960;SE:Scaffold_166:1265521-1265894:1266072-1266670:-	SE	0.196105	0.0304695	Ppup161960	-2.02055	2.04e-57	Homeobox protein PKNOX2
Ppup140770;AL:Scaffold_0:3412296-3414421:3414670:3412296-3418230:3418551:+	AL	0.192559	0.0390364	Ppup140770	2.26518	8.12e-56	Serpin B8
Ppup059090;A5:Scaffold_6:2639964-2640140:2639919-2640140:+	A5	0.192396	0.031968	Ppup059090	3.28446	5.09e-87	Transmembrane protein 104 homolog
Ppup047880_Ppup047870;A5:Scaffold_21:7905-7993:7872-7993:+	A5	0.190784	0.012987	Ppup047880_Ppup047870	-5.54009	3.03e-05
Ppup080270;SE:Scaffold_98:874335-874632:874781-874983:+	SE	0.188307	0.02997	Ppup080270	-3.47237	3.65e-27	Putative uncharacterized protein
Ppup005310_Ppup005300;SE:Scaffold_427:61975-62083:62181-62285:-	SE	0.187876	0.0262238	Ppup005310_Ppup005300	2.23408	1.41e-145
Ppup133960;SE:Scaffold_19:2094149-2096851:2097085-2098814:+	SE	0.185919	0.0314685	Ppup133960	2.17632	1.56e-75	Ankyrin-3
Ppup140770;AL:Scaffold_0:3412296-3414421:3416321:3412296-3418230:3418551:+	AL	0.185688	0.0347525	Ppup140770	2.26518	8.12e-56	Serpin B8
Ppup127340;A3:Scaffold_3:6714691-6714753:6714691-6714783:+	A3	0.175082	0.0460789	Ppup127340	-3.1515	1.12e-117	Zinc finger CCHC domain-containing protein 2
Ppup140770;AL:Scaffold_0:3412296-3416586:3418205:3412296-3421381:3421655:+	AL	0.169366	0.0466676	Ppup140770	2.26518	8.12e-56	Serpin B8
Ppup127340;AF:Scaffold_3:6709604:6710005-6712058:6711153:6711436-6712058:+	AF	0.145282	0.0460789	Ppup127340	-3.1515	1.12e-117	Zinc finger CCHC domain-containing protein 2
Ppup046850;RI:Scaffold_1:7216056:7216311-7216390:7217864:+	RI	0.143329	0.041958	Ppup046850	-3.31675	5.55e-280	Coiled-coil domain-containing protein 115
Ppup151340_Ppup151350;RI:Scaffold_219:822069:822532-822779:823073:+	RI	0.14205	0.043956	Ppup151340_Ppup151350	3.52051	1.14e-45
Ppup017700;MX:Scaffold_28:244364-245066:245166-252624:244364-248410:248510-252624:+	MX	0.140149	0.024531	Ppup017700	-2.5179	4.8e-05	Troponin I
Ppup170900;RI:Scaffold_529:39624:39821-39906:39926:+	RI	0.138869	0.010989	Ppup170900	11.0855	2.49e-38	Putative uncharacterized protein
Ppup044750;SE:Scaffold_1:2947589-2947674:2947815-2948039:+	SE	0.135905	0.0274725	Ppup044750	11.7217	5.23e-26	Putative uncharacterized protein
Ppup050410;AF:Scaffold_21:2990841:2991129-2993328:2991558:2991784-2993328:+	AF	0.129513	0.023976	Ppup050410	-2.50015	1.28e-186	Putative ATP-dependent RNA helicase me31b
Ppup113740;A5:Scaffold_2:5975922-5976477:5975919-5976477:+	A5	0.128131	0.0494505	Ppup113740	2.25408	4.07e-42	C2 domain-containing protein 2
Ppup017700;SE:Scaffold_28:241555-243740:243757-244034:+	SE	0.127946	0.0246254	Ppup017700	-2.5179	4.8e-05	Troponin I
Ppup139080;RI:Scaffold_0:795251:795310-795956:796213:+	RI	0.115063	0.030969	Ppup139080	2.47771	2.66e-65	ATP-dependent RNA helicase p62
Ppup094310;AF:Scaffold_8:4092841-4094036:4094318:4092841-4100927:4100986:-	AF	0.108424	0.0424575	Ppup094310	6.72028	0	Zinc transporter ZIP3
Ppup055610;RI:Scaffold_45:78850:79158-79164:81128:-	RI	0.10459	0.036963	Ppup055610	2.6276	7.31e-91	Tensin
Ppup140770;AL:Scaffold_0:3412296-3417683:3418002:3412296-3419324:3419734:+	AL	0.102796	0.0471861	Ppup140770	2.26518	8.12e-56	Serpin B8
Ppup139080;RI:Scaffold_0:796637:796838-797131:797370:+	RI	0.0873574	0.030969	Ppup139080	2.47771	2.66e-65	ATP-dependent RNA helicase p62
Ppup049670_Ppup049680;SE:Scaffold_21:2082988-2083369:2083452-2086486:+	SE	0.083799	0.030969	Ppup049670_Ppup049680	10.4421	0
Ppup044750;A3:Scaffold_1:2948176-2948331:2948176-2948388:+	A3	0.0775214	0.04329	Ppup044750	11.7217	5.23e-26	Putative uncharacterized protein
Ppup154760;RI:Scaffold_575:350548:351034-352150:352348:-	RI	0.0591981	0.0484515	Ppup154760	3.88558	0	NAD-dependent protein deacetylase Sirt6
Ppup061580;RI:Scaffold_126:22771:22860-22981:23587:+	RI	-0.0795317	0.038628	Ppup061580	2.93948	4.22e-10	Endoplasmin
Ppup172430;SE:Scaffold_7:658998-660945:661016-661782:+	SE	-0.0797184	0.0454545	Ppup172430	2.54289	1.15e-73	Fibropellin-1
Ppup061580;RI:Scaffold_126:23687:23775-23814:25810:+	RI	-0.088758	0.024975	Ppup061580	2.93948	4.22e-10	Endoplasmin
Ppup095740;A3:Scaffold_8:5429320-5429514:5429320-5429538:+	A3	-0.0943695	0.0244755	Ppup095740	-2.20835	4.18e-126	Protein phosphatase PP2A 55 kDa regulatory subunit
Ppup081600;A5:Scaffold_17:76209-76537:76205-76537:+	A5	-0.100413	0.023976	Ppup081600	11.9115	2.54e-34	Serine protease 55
novelGenePB.6914;SE:Scaffold_111:808391-809547:809561-809653:-	SE	-0.103255	0.0374625	novelGenePB.6914	11.8067	2.06e-100
Ppup140770;SE:Scaffold_0:3412296-3416586:3416727-3417683:+	SE	-0.106694	0.0471861	Ppup140770	2.26518	8.12e-56	Serpin B8
novelGeneAS239;A3:Scaffold_8:2516013-2516096:2515998-2516096:-	A3	-0.108275	0.0444555	novelGeneAS239	-5.23037	0.000113109
Ppup122840_Ppup122830;A5:Scaffold_3:1068924-1068998:1068857-1068998:+	A5	-0.112119	0.0304695	Ppup122840_Ppup122830	2.09568	2.42e-30
Ppup134410;AF:Scaffold_19:2661528:2661629-2667548:2663262:2666563-2667548:+	AF	-0.143792	0.014985	Ppup134410	3.16106	1.6e-76	Venom acid phosphatase Acph-1
Ppup080270;AF:Scaffold_98:871838:872277-873726:872802:872888-873726:+	AF	-0.14962	0.02997	Ppup080270	-3.47237	3.65e-27	Putative uncharacterized protein
Ppup006550;RI:Scaffold_4:1507401:1507540-1507643:1507827:+	RI	-0.152367	0.00749251	Ppup006550	3.55808	2.31e-118	Multiple coagulation factor deficiency protein 2 homolog
Ppup061580;RI:Scaffold_126:22339:22637-22771:22860:+	RI	-0.154183	0.017982	Ppup061580	2.93948	4.22e-10	Endoplasmin
Ppup133780;AF:Scaffold_19:1862277-1862415:1862465:1862277-1867520:1867828:-	AF	-0.154938	0.0034965	Ppup133780	2.07925	1.5e-158	Very long-chain-fatty-acid--CoA ligase bubblegum
Ppup145990;AF:Scaffold_0:11927074-11928424:11928508:11927074-11931889:11932471:-	AF	-0.156105	0.0184815	Ppup145990	3.0452	1.24e-56	Leucine-rich repeat-containing protein 20
Ppup140970;AF:Scaffold_0:3704396-3704468:3705430:3704396-3705431:3705638:-	AF	-0.156854	0.0487013	Ppup140970	-3.41106	3.65e-44	Lipid storage droplets surface-binding protein 2
Ppup054230;AF:Scaffold_27:3166878:3167026-3167464:3167282:3167375-3167464:+	AF	-0.157761	0.032967	Ppup054230	2.25194	5.55e-59	G protein pathway suppressor 2
Ppup045560;A5:Scaffold_1:4624071-4634523:4624061-4634523:+	A5	-0.158256	0.0374625	Ppup045560	2.11456	8.41e-103	Golgi integral membrane protein 4
Ppup125860;SE:Scaffold_3:4870083-4871128:4871961-4872339:+	SE	-0.160839	0.0496503	Ppup125860	-5.12933	4.27e-10	Glycogenin-1
Ppup040400;AF:Scaffold_9:2459417:2459668-2460683:2460073:2460264-2460683:+	AF	-0.161566	0.0404595	Ppup040400	-2.86385	8.45e-51	Putative uncharacterized protein
Ppup125860;SE:Scaffold_3:4872533-4872855:4872877-4873012:+	SE	-0.168896	0.0496503	Ppup125860	-5.12933	4.27e-10	Glycogenin-1
Ppup043330;SE:Scaffold_1:386823-394724:394797-405437:-	SE	-0.172226	0.0174825	Ppup043330	4.6021	1.41e-216	Vanin-like protein 2
Ppup006060;SE:Scaffold_4:1066341-1067257:1067316-1070333:+	SE	-0.173153	0.027972	Ppup006060	2.20604	4.11e-213	Tumor protein D54
Ppup108380;A3:Scaffold_167:131831-133718:131819-133718:-	A3	-0.175088	0.036963	Ppup108380	4.50285	1.01e-46	Serine protease snake
Ppup017700;MX:Scaffold_28:244364-247256:247356-252624:244364-248410:248510-252624:+	MX	-0.175686	0.016983	Ppup017700	-2.5179	4.8e-05	Troponin I
Ppup136900;A3:Scaffold_33:993583-1006948:993317-1006948:-	A3	-0.186519	0.025308	Ppup136900	11.1676	5.67e-120	Venom acid phosphatase Acph-1
Ppup142250;RI:Scaffold_0:5420691:5420830-5421275:5421659:+	RI	-0.187084	0.00799201	Ppup142250	2.16567	3.65e-72	Transmembrane emp24 domain-containing protein eca
Ppup140770;AL:Scaffold_0:3412296-3419324:3419734:3412296-3426218:3426535:+	AL	-0.190885	0.0347525	Ppup140770	2.26518	8.12e-56	Serpin B8
Ppup002810;A3:Scaffold_26:1634083-1634161:1634071-1634161:-	A3	-0.190976	0.00599401	Ppup002810	8.99251	0	Alpha-amylase 2
Ppup071210;A3:Scaffold_30:1611866-1612142:1611767-1612142:-	A3	-0.191382	0.0444555	Ppup071210	3.09807	8.46e-92	Venom carboxylesterase-6
novelGeneMSTRG.1567;RI:Scaffold_1028:37385:38865-38956:39129:-	RI	-0.192227	0.022977	novelGeneMSTRG.1567	3.04956	1.73e-26
Ppup081600;RI:Scaffold_17:82994:83230-83565:83710:+	RI	-0.19739	0.00799201	Ppup081600	11.9115	2.54e-34	Serine protease 55
Ppup046230;RI:Scaffold_1:6137178:6137528-6137639:6137673:+	RI	-0.198524	0.0484515	Ppup046230	2.22784	2.04e-88	Glucose-6-phosphate exchanger SLC37A2
Ppup140770;AL:Scaffold_0:3412296-3421381:3421655:3412296-3426218:3426665:+	AL	-0.20013	0.0390364	Ppup140770	2.26518	8.12e-56	Serpin B8
Ppup140780;AF:Scaffold_0:3431795-3431929:3432659:3431795-3433202:3433469:-	AF	-0.203069	0.0484515	Ppup140780	-4.08961	1.47e-38	Putative uncharacterized protein
Ppup140770;AL:Scaffold_0:3412296-3417683:3418002:3412296-3425377:3425882:+	AL	-0.205055	0.00907426	Ppup140770	2.26518	8.12e-56	Serpin B8
Ppup135110;SE:Scaffold_19:3815151-3815732:3815737-3815839:-	SE	-0.208608	0.0302198	Ppup135110	-2.25109	1.02e-115	Dynamin
Ppup137940;MX:Scaffold_53:1637665-1640751:1640845-1647695:1637665-1646015:1646109-1647695:-	MX	-0.211531	0.034965	Ppup137940	-2.34366	7.5e-23	Sodium/potassium-transporting ATPase subunit alpha
Ppup094020;RI:Scaffold_8:3886380:3887168-3887176:3887402:-	RI	-0.215366	0.024975	Ppup094020	-2.30423	3.5e-74	Putative uncharacterized protein
Ppup008030_Ppup008420;AL:Scaffold_4:3456545-3681551:3682149:3456545-3683070:3684207:+	AL	-0.216449	0.0444555	Ppup008030_Ppup008420	-2.30534	1.24e-28
Ppup116930;SE:Scaffold_50:696449-696973:697173-697477:-	SE	-0.217625	0.0499501	Ppup116930	-2.25424	6.55e-23	Putative uncharacterized protein
Ppup169360;AF:Scaffold_25:4900226-4901004:4901457:4900226-4903251:4903434:-	AF	-0.21779	0.022977	Ppup169360	-4.46916	1.88e-14	G2/mitotic-specific cyclin-B3
Ppup021370;AF:Scaffold_35:1882242:1882365-1883230:1882574:1882634-1883230:+	AF	-0.231234	0.00699301	Ppup021370	4.99823	1.25e-195	Ester hydrolase C11orf54 homolog
Ppup133260;AF:Scaffold_19:1307842:1308061-1311030:1310077:1310192-1311030:+	AF	-0.231339	0.00333	Ppup133260	4.17939	2.06e-165	Vacuole membrane protein 1
Ppup109770;A5:Scaffold_2:362312-363095:361956-363095:+	A5	-0.233387	0.0224775	Ppup109770	3.35727	2.43e-160	High affinity copper uptake protein 1
Ppup035840;AF:Scaffold_54:1042594:1042857-1043352:1043032:1043161-1043352:+	AF	-0.233393	0.0284715	Ppup035840	-2.36534	8.15e-20	Chromobox protein homolog 5
Ppup021370;RI:Scaffold_35:1882574:1882634-1883230:1883364:+	RI	-0.245221	0.00699301	Ppup021370	4.99823	1.25e-195	Ester hydrolase C11orf54 homolog
Ppup095740;AF:Scaffold_8:5409748:5409987-5426964:5425090:5426376-5426964:+	AF	-0.245837	0.00599401	Ppup095740	-2.20835	4.18e-126	Protein phosphatase PP2A 55 kDa regulatory subunit
Ppup115160;A5:Scaffold_2:8393984-8394480:8393984-8394522:-	A5	-0.250626	0.023976	Ppup115160	2.93982	4.48e-257	Dyslexia-associated protein KIAA0319
Ppup140770;AL:Scaffold_0:3412296-3416917:3418551:3412296-3425377:3425882:+	AL	-0.251688	0.0474203	Ppup140770	2.26518	8.12e-56	Serpin B8
Ppup125860;A3:Scaffold_3:4872533-4873012:4872533-4874158:+	A3	-0.254395	0.0496503	Ppup125860	-5.12933	4.27e-10	Glycogenin-1
Ppup010170;SE:Scaffold_4:6260087-6260866:6260953-6263094:+	SE	-0.254599	0.0434565	Ppup010170	-3.44681	3.42e-46	Putative uncharacterized protein
Ppup083190;RI:Scaffold_17:1528200:1528565-1528616:1528783:+	RI	-0.254711	0.016983	Ppup083190	10.6462	1.2e-40	Kynurenine--oxoglutarate transaminase 1
Ppup003240;AF:Scaffold_26:2079177:2079362-2080014:2079580:2079775-2080014:+	AF	-0.255082	0.03996	Ppup003240	4.57869	1.22e-88	Natterin-3
Ppup095740;AF:Scaffold_8:5409748:5409987-5426964:5425726:5426376-5426964:+	AF	-0.261642	0.00599401	Ppup095740	-2.20835	4.18e-126	Protein phosphatase PP2A 55 kDa regulatory subunit
Ppup079940;A3:Scaffold_98:346386-346657:346383-346657:-	A3	-0.265836	0.0384615	Ppup079940	-2.07521	3.8e-10	Choline transporter-like protein 2
Ppup120290;A3:Scaffold_16:2111568-2111764:2111533-2111764:-	A3	-0.26755	0.02997	Ppup120290	-3.25575	1.82e-36	Lysosomal acid phosphatase
Ppup153690;AF:Scaffold_292:564083:564225-585098:583408:583691-585098:+	AF	-0.270925	0.001998	Ppup153690	5.60088	0	Sodium-coupled monocarboxylate transporter 2
Ppup071220;SE:Scaffold_30:1614937-1615025:1615187-1615276:-	SE	-0.272392	0.020979	Ppup071220	10.9993	0	Putative uncharacterized protein
Ppup140770;AL:Scaffold_0:3412296-3418230:3418551:3412296-3423895:3424249:+	AL	-0.272568	0.0466676	Ppup140770	2.26518	8.12e-56	Serpin B8
Ppup141910;AF:Scaffold_0:4910876-4911453:4911690:4910876-4911835:4911948:-	AF	-0.272617	0.002997	Ppup141910	2.38944	1.44e-146	Integral membrane protein 2A
Ppup010390;RI:Scaffold_4:6461309:6461712-6461791:6462793:+	RI	-0.274257	0.000999001	Ppup010390	4.33572	1.8e-189	Leukocyte elastase inhibitor
Ppup052740;A3:Scaffold_27:725468-730986:725468-731084:+	A3	-0.274962	0.034965	Ppup052740	3.95097	8.39e-89	Leucine repeat adapter protein 25
Ppup002910;RI:Scaffold_26:1736049:1736164-1736251:1736358:-	RI	-0.277092	0.026973	Ppup002910	-4.10801	1.53e-42	Protein D7
Ppup112450;A3:Scaffold_2:3737509-3737819:3737472-3737819:-	A3	-0.288075	0.012987	Ppup112450	-3.33837	7.55e-107	Protein maelstrom homolog
Ppup156210;A3:Scaffold_174:254348-254704:254336-254704:-	A3	-0.291969	0.002997	Ppup156210	-4.82014	1.73e-74	Neurofibromin
Ppup136900;A3:Scaffold_33:993508-1006948:993317-1006948:-	A3	-0.29208	0.00799201	Ppup136900	11.1676	5.67e-120	Venom acid phosphatase Acph-1
Ppup163540;RI:Scaffold_180:316145:316176-316259:316780:+	RI	-0.307253	0	Ppup163540	11.2198	7.94e-23	Putative uncharacterized protein
Ppup116870;A5:Scaffold_50:608283-608415:608279-608415:+	A5	-0.311137	0.0124875	Ppup116870	4.61186	1.14e-209	Transcription factor Ken
Ppup008700;SE:Scaffold_4:4025198-4029417:4029478-4029684:+	SE	-0.312814	0.001998	Ppup008700	3.08229	9e-186	Protein lifeguard 1
Ppup104210;A5:Scaffold_10:1152444-1152525:1152402-1152525:+	A5	-0.312831	0.033966	Ppup104210	-5.58906	0.00036116	Protein regulator of cytokinesis 1
Ppup140770;A3:Scaffold_0:3412296-3423553:3412296-3423895:+	A3	-0.315764	0.044363	Ppup140770	2.26518	8.12e-56	Serpin B8
Ppup081840;RI:Scaffold_17:369292:369724-369812:370672:+	RI	-0.318754	0.01998	Ppup081840	-5.6358	5.86e-05	Protein Daple
Ppup140770;AL:Scaffold_0:3412296-3416586:3418205:3412296-3425377:3425882:+	AL	-0.318878	0.0278559	Ppup140770	2.26518	8.12e-56	Serpin B8
Ppup133780;AF:Scaffold_19:1862277-1862415:1862465:1862277-1866244:1866383:-	AF	-0.321019	0.00174825	Ppup133780	2.07925	1.5e-158	Very long-chain-fatty-acid--CoA ligase bubblegum
Ppup173830_Ppup173840;MX:Scaffold_7:3155176-3156989:3157124-3160853:3155176-3158964:3159099-3160853:+	MX	-0.321407	0.00899101	Ppup173830_Ppup173840	2.22196	3.16e-295
Ppup163540;RI:Scaffold_180:317268:317470-317588:317793:+	RI	-0.325414	0	Ppup163540	11.2198	7.94e-23	Putative uncharacterized protein
Ppup009420;A5:Scaffold_4:5230336-5230625:5230322-5230625:+	A5	-0.325791	0.00999001	Ppup009420	-5.75327	7.12e-05	Putative uncharacterized protein
Ppup125860;RI:Scaffold_3:4873012:4873093-4874158:4876946:+	RI	-0.326249	0.0496503	Ppup125860	-5.12933	4.27e-10	Glycogenin-1
Ppup060150;A3:Scaffold_6:4592280-4593568:4592231-4593568:-	A3	-0.327651	0.041958	Ppup060150	-5.06901	7.63e-13	P protein
Ppup003890;MX:Scaffold_26:2530038-2530294:2530372-2531287:2530038-2530976:2531054-2531287:+	MX	-0.327763	0.003996	Ppup003890	-2.15965	3.51e-10	Putative uncharacterized protein
Ppup104210;A5:Scaffold_10:1152444-1152525:1152388-1152525:+	A5	-0.327862	0.033966	Ppup104210	-5.58906	0.00036116	Protein regulator of cytokinesis 1
Ppup060150;A3:Scaffold_6:4590968-4591224:4590953-4591224:-	A3	-0.328037	0.041958	Ppup060150	-5.06901	7.63e-13	P protein
Ppup009860_Ppup009870;AF:Scaffold_4:5840081-5840505:5840765:5840081-5843723:5843909:-	AF	-0.328486	0.0014985	Ppup009860_Ppup009870	2.34943	1.42e-59
Ppup052740;AF:Scaffold_27:720613:723351-725207:723754:724369-725207:+	AF	-0.328505	0.034965	Ppup052740	3.95097	8.39e-89	Leucine repeat adapter protein 25
Ppup140770;AL:Scaffold_0:3412296-3416586:3418002:3412296-3425377:3425882:+	AL	-0.329567	0.0384322	Ppup140770	2.26518	8.12e-56	Serpin B8
Ppup008600_Ppup008030;AF:Scaffold_4:3447458:3447612-3451112:3448933:3449164-3451112:+	AF	-0.333797	0.0334665	Ppup008600_Ppup008030	-2.77092	1.77e-45
Ppup140770;AL:Scaffold_0:3412296-3417683:3418002:3412296-3425377:3425626:+	AL	-0.333973	0	Ppup140770	2.26518	8.12e-56	Serpin B8
Ppup150460;RI:Scaffold_219857:20278:20441-20512:20609:-	RI	-0.335088	0.024975	Ppup150460	-2.06874	4.52e-56	Zinc finger MYM-type protein 3
Ppup109770;AF:Scaffold_2:355912:356386-363095:361927:362312-363095:+	AF	-0.3357	0.014985	Ppup109770	3.35727	2.43e-160	High affinity copper uptake protein 1
Ppup140770;AL:Scaffold_0:3412296-3414421:3415671:3412296-3423895:3424249:+	AL	-0.339469	0.0338772	Ppup140770	2.26518	8.12e-56	Serpin B8
Ppup044750;RI:Scaffold_1:2949490:2949929-2949932:2950008:+	RI	-0.341727	0	Ppup044750	11.7217	5.23e-26	Putative uncharacterized protein
Ppup003610;A5:Scaffold_26:2395328-2395473:2395250-2395473:+	A5	-0.347659	0.0154845	Ppup003610	-5.68865	4.46e-06	E3 ubiquitin-protein ligase TTC3
Ppup133960;AL:Scaffold_19:2073640-2074808:2075337:2073640-2094081:2096451:+	AL	-0.35165	0.0404595	Ppup133960	2.17632	1.56e-75	Ankyrin-3
Ppup045950;SE:Scaffold_1:5280787-5443607:5443609-5566076:+	SE	-0.352588	0.038961	Ppup045950	-4.02149	1.43e-29	Fasciclin-3
Ppup133440;RI:Scaffold_19:1556894:1557391-1557445:1558600:-	RI	-0.354845	0	Ppup133440	-2.38979	2.97e-10	Vitellogenin
Ppup009640;SE:Scaffold_4:5472496-5472754:5473104-5473385:+	SE	-0.355998	0.001998	Ppup009640	2.08194	7.75e-49	Valine--tRNA ligase
Ppup057080;A3:Scaffold_553:456269-456387:456269-456403:+	A3	-0.356316	0.0474525	Ppup057080	3.49331	2.24e-171	Major facilitator superfamily domain-containing protein 6
Ppup140770;AL:Scaffold_0:3412296-3420857:3421181:3412296-3423895:3424249:+	AL	-0.360018	0.0223366	Ppup140770	2.26518	8.12e-56	Serpin B8
Ppup140770;AL:Scaffold_0:3412296-3419324:3421181:3412296-3425377:3425882:+	AL	-0.360601	0.0265588	Ppup140770	2.26518	8.12e-56	Serpin B8
Ppup133840;AF:Scaffold_19:1894400-1894477:1894664:1894400-1911624:1911805:-	AF	-0.361648	0.002997	Ppup133840	2.09794	3.7e-56	CCAAT/enhancer-binding protein gamma
Ppup011430;A3:Scaffold_4:7451755-7451900:7451755-7451915:+	A3	-0.362066	0.00999001	Ppup011430	-2.16352	6.54e-78	Esterase FE4
Ppup016850;AL:Scaffold_231:309375-312226:313677:309375-313959:316229:+	AL	-0.362468	0.002997	Ppup016850	-2.72089	2.98e-19	Cerebellar degeneration-related protein 2-like
Ppup008030_Ppup008420;AL:Scaffold_4:3456545-3682353:3682639:3456545-3683070:3684207:+	AL	-0.371828	0.027972	Ppup008030_Ppup008420	-2.30534	1.24e-28
Ppup020900;RI:Scaffold_35:1410343:1410453-1410531:1412560:-	RI	-0.372202	0.0337995	Ppup020900	4.03787	0	Putative uncharacterized protein
Ppup140770;AL:Scaffold_0:3412296-3414421:3415671:3412296-3426218:3426665:+	AL	-0.372446	0.0471861	Ppup140770	2.26518	8.12e-56	Serpin B8
Ppup027690;AF:Scaffold_5:4630563-4630690:4630833:4630563-4641486:4642652:-	AF	-0.389793	0.013986	Ppup027690	2.65932	2.44e-71	MOB kinase activator-like 2
Ppup104760;A5:Scaffold_10:1917862-1918656:1917560-1918656:+	A5	-0.393696	0.02997	Ppup104760	2.65433	2.23e-78	ER degradation-enhancing alpha-mannosidase-like protein 3
Ppup140770;AL:Scaffold_0:3412296-3419324:3419734:3412296-3423895:3424249:+	AL	-0.393765	0.0171933	Ppup140770	2.26518	8.12e-56	Serpin B8
Ppup017700;A5:Scaffold_28:242234-243740:241555-243740:+	A5	-0.404012	0.0191059	Ppup017700	-2.5179	4.8e-05	Troponin I
Ppup049100;AF:Scaffold_21:1164899-1167465:1167685:1164899-1179839:1180176:-	AF	-0.40504	0.01998	Ppup049100	2.06777	6.63e-72	V-type proton ATPase 116 kDa subunit a isoform 1
Ppup165960;AF:Scaffold_25:957812:958025-960599:959851:960239-960599:+	AF	-0.406392	0.00749251	Ppup165960	-4.22972	3.56e-42	Ribonucleoside-diphosphate reductase subunit M2
Ppup008030_Ppup008560;AF:Scaffold_4:3447458:3447612-3451112:3448933:3449164-3451112:+	AF	-0.407637	0.011988	Ppup008030_Ppup008560	-2.25401	1.08e-57
Ppup140770;AL:Scaffold_0:3412296-3421381:3421655:3412296-3426218:3426535:+	AL	-0.407645	0.00640536	Ppup140770	2.26518	8.12e-56	Serpin B8
Ppup037880;AF:Scaffold_79:1188015:1188306-1218442:1204407:1205227-1218442:+	AF	-0.414281	0.00599401	Ppup037880	-3.78724	1.36e-28	Transcriptional activator Myb
Ppup060190;A3:Scaffold_6:4662587-4663974:4662587-4664268:+	A3	-0.414527	0.0024975	Ppup060190	10.9307	7.18e-29	Modular serine protease
Ppup044780;AF:Scaffold_1:2984629-2986945:2987210:2984629-3001822:3002070:-	AF	-0.418639	0.0024975	Ppup044780	2.05475	7.41e-43	Aldose 1-epimerase
Ppup140770;AL:Scaffold_0:3412296-3421381:3421655:3412296-3423895:3424249:+	AL	-0.420548	0.00640536	Ppup140770	2.26518	8.12e-56	Serpin B8
Ppup043240;RI:Scaffold_1:264539:264810-264823:265645:+	RI	-0.421518	0.0024975	Ppup043240	-5.36429	0.00015033	Putative uncharacterized protein
Ppup096400;A5:Scaffold_103:215857-215942:215746-215942:+	A5	-0.423755	0.044955	Ppup096400	9.71819	2.64e-24	Kynurenine--oxoglutarate transaminase 1
Ppup140970;A5:Scaffold_0:3704396-3705393:3704396-3705431:-	A5	-0.425102	0.0014985	Ppup140970	-3.41106	3.65e-44	Lipid storage droplets surface-binding protein 2
Ppup140770;AL:Scaffold_0:3412296-3423895:3424249:3412296-3425377:3425882:+	AL	-0.426949	0.00640536	Ppup140770	2.26518	8.12e-56	Serpin B8
novelGeneMSTRG.8652;RI:Scaffold_403:8834:9102-10322:10739:+	RI	-0.429275	0.014985	novelGeneMSTRG.8652	5.05643	0
Ppup140770;AL:Scaffold_0:3412296-3414421:3416321:3412296-3425377:3425882:+	AL	-0.430409	0.00388897	Ppup140770	2.26518	8.12e-56	Serpin B8
Ppup017700;RI:Scaffold_28:243740:243757-244034:244162:+	RI	-0.431771	0.0191059	Ppup017700	-2.5179	4.8e-05	Troponin I
Ppup105870_Ppup105880;A5:Scaffold_10:3538296-3538392:3538291-3538392:+	A5	-0.435348	0.044955	Ppup105870_Ppup105880	9.75567	1.47e-104
Ppup027690;AF:Scaffold_5:4630563-4630690:4630833:4630563-4637522:4639012:-	AF	-0.437631	0.0157343	Ppup027690	2.65932	2.44e-71	MOB kinase activator-like 2
Ppup135080;RI:Scaffold_19:3693352:3693614-3693718:3693874:+	RI	-0.438851	0.0194805	Ppup135080	-4.23661	3.93e-58	Calcium uniporter protein, mitochondrial
Ppup063850;SE:Scaffold_13:2689700-2689780:2689883-2689996:-	SE	-0.441459	0.0114885	Ppup063850	-2.57923	1.84e-94	Crossover junction endonuclease MUS81
Ppup137480;AF:Scaffold_53:550063-550698:550788:550063-551885:552303:-	AF	-0.443124	0.020979	Ppup137480	-4.35034	1.2e-54	Cell division cycle protein 16 homolog
Ppup140770;AL:Scaffold_0:3412296-3414421:3414670:3412296-3425377:3425882:+	AL	-0.446458	0	Ppup140770	2.26518	8.12e-56	Serpin B8
Ppup140770;AL:Scaffold_0:3412296-3416917:3418551:3412296-3425377:3425626:+	AL	-0.452906	0.00640536	Ppup140770	2.26518	8.12e-56	Serpin B8
novelGeneAS200;A3:Scaffold_50:530238-530323:530208-530323:-	A3	-0.454552	0.030969	novelGeneAS200	-5.07396	1.73e-40
Ppup035500;A3:Scaffold_54:757317-757430:757254-757430:-	A3	-0.460944	0.0264735	Ppup035500	-6.06589	1.37e-10	Putative uncharacterized protein
Ppup109770;AF:Scaffold_2:355912:356386-363095:361927:361956-363095:+	AF	-0.477365	0	Ppup109770	3.35727	2.43e-160	High affinity copper uptake protein 1
Ppup041330;AF:Scaffold_9:4263549-4265958:4266041:4263549-4272220:4273157:-	AF	-0.477818	0.044955	Ppup041330	-3.40764	5.53e-07	Organic cation transporter protein
Ppup136730;AF:Scaffold_33:501902:502124-527555:526851:526927-527555:+	AF	-0.47849	0.00999001	Ppup136730	-2.35585	2.77e-14	Venom serine protease 34
Ppup142430;AF:Scaffold_0:5758807:5759096-5776999:5775577:5775772-5776999:+	AF	-0.481836	0.00499501	Ppup142430	3.98971	0	PDZ domain-containing protein 2
Ppup040030;AF:Scaffold_9:2274910-2277052:2277214:2274910-2282216:2282432:-	AF	-0.489115	0.00499501	Ppup040030	5.35142	1.51e-48	Sodium-dependent phosphate transporter 1-A
Ppup144990;RI:Scaffold_0:10708072:10708623-10708695:10709096:+	RI	-0.489135	0.023976	Ppup144990	2.58221	3.58e-74	Graves disease carrier protein
Ppup107930;AF:Scaffold_159:563500:563889-612629:599769:600225-612629:+	AF	-0.498059	0.025974	Ppup107930	-2.23562	1.61e-17	Putative uncharacterized protein
Ppup144420;AF:Scaffold_0:10025212:10025464-10040947:10039971:10040345-10040947:+	AF	-0.498893	0	Ppup144420	2.75896	8.53e-06	NAD-dependent alcohol dehydrogenase
Ppup130520_Ppup130510;A5:Scaffold_150:838499-841111:838495-841111:+	A5	-0.502426	0.00224775	Ppup130520_Ppup130510	-2.49668	3.9e-18
Ppup140770;AL:Scaffold_0:3412296-3416586:3418002:3412296-3425377:3425626:+	AL	-0.504371	0.00388897	Ppup140770	2.26518	8.12e-56	Serpin B8
Ppup154130;A5:Scaffold_384:53981-54055:53875-54055:+	A5	-0.513292	0.032967	Ppup154130	-2.67162	3.09e-22	Aprataxin
Ppup133780;AF:Scaffold_19:1862277-1862415:1862465:1862277-1864761:1865053:-	AF	-0.513429	0	Ppup133780	2.07925	1.5e-158	Very long-chain-fatty-acid--CoA ligase bubblegum
Ppup008030_Ppup008540;AF:Scaffold_4:3447458:3447612-3451112:3448933:3449164-3451112:+	AF	-0.513818	0.0044955	Ppup008030_Ppup008540	-4.0491	1.03e-73
Ppup140770;AL:Scaffold_0:3412296-3414421:3415671:3412296-3416586:3418205:+	AL	-0.515043	0.036297	Ppup140770	2.26518	8.12e-56	Serpin B8
Ppup083190;A5:Scaffold_17:1525325-1526323:1525203-1526323:+	A5	-0.518841	0	Ppup083190	10.6462	1.2e-40	Kynurenine--oxoglutarate transaminase 1
Ppup133960;AL:Scaffold_19:2073640-2074808:2076525:2073640-2094081:2096451:+	AL	-0.519343	0.0314685	Ppup133960	2.17632	1.56e-75	Ankyrin-3
Ppup065840;SE:Scaffold_240:85136-86531:86578-87228:+	SE	-0.519604	0.003996	Ppup065840	2.9287	4.33e-182	Piezo-type mechanosensitive ion channel component
Ppup052740;AF:Scaffold_27:720613:723351-725207:723754:723953-725207:+	AF	-0.532631	0.02997	Ppup052740	3.95097	8.39e-89	Leucine repeat adapter protein 25
Ppup071360;RI:Scaffold_30:1726829:1726899-1726975:1727248:+	RI	-0.53801	0.00849151	Ppup071360	-2.17273	3.61e-16	Putative uncharacterized protein
Ppup140770;SE:Scaffold_0:3412296-3424700:3424847-3425377:+	SE	-0.542373	0	Ppup140770	2.26518	8.12e-56	Serpin B8
Ppup133780;SE:Scaffold_19:1862277-1863055:1863357-1864761:-	SE	-0.543055	0.00699301	Ppup133780	2.07925	1.5e-158	Very long-chain-fatty-acid--CoA ligase bubblegum
Ppup140770;AL:Scaffold_0:3412296-3417683:3418551:3412296-3425377:3425882:+	AL	-0.543614	0.00388897	Ppup140770	2.26518	8.12e-56	Serpin B8
Ppup140770;AL:Scaffold_0:3412296-3423553:3424249:3412296-3425377:3425882:+	AL	-0.551554	0	Ppup140770	2.26518	8.12e-56	Serpin B8
Ppup119990;A3:Scaffold_16:1741793-1745766:1741688-1745766:-	A3	-0.552491	0.035964	Ppup119990	-2.80984	7.89e-17	Putative uncharacterized protein
Ppup140770;AL:Scaffold_0:3412296-3419324:3421181:3412296-3425377:3425626:+	AL	-0.555731	0.00388897	Ppup140770	2.26518	8.12e-56	Serpin B8
Ppup140770;AL:Scaffold_0:3412296-3414421:3415671:3412296-3425377:3425882:+	AL	-0.562266	0.00388897	Ppup140770	2.26518	8.12e-56	Serpin B8
Ppup001870;A5:Scaffold_247:309330-311215:309330-311236:-	A5	-0.565146	0.02997	Ppup001870	-3.32554	3.43e-22	Beta-hexosaminidase subunit beta
Ppup020900;RI:Scaffold_35:1410343:1410973-1412188:1412560:-	RI	-0.573325	0.0337995	Ppup020900	4.03787	0	Putative uncharacterized protein
Ppup113230;AF:Scaffold_2:5150734:5151212-5168502:5167490:5167929-5168502:+	AF	-0.573737	0.0014985	Ppup113230	2.40709	2.89e-15	Synaptotagmin 1
Ppup110870;RI:Scaffold_2:1889160:1889533-1889606:1889891:-	RI	-0.577696	0.0014985	Ppup110870	3.0865	0	Putative inorganic phosphate cotransporter
Ppup008030_Ppup008420;AF:Scaffold_4:3447458:3447612-3451112:3448933:3449164-3451112:+	AF	-0.579555	0.001998	Ppup008030_Ppup008420	-2.30534	1.24e-28
Ppup140770;AL:Scaffold_0:3412296-3416586:3418205:3412296-3425377:3425626:+	AL	-0.590418	0.00640536	Ppup140770	2.26518	8.12e-56	Serpin B8
Ppup035830;A3:Scaffold_54:1039928-1040269:1039924-1040269:-	A3	-0.593754	0.0134865	Ppup035830	-2.45346	0.0052676	Sepiapterin reductase
Ppup031630;SE:Scaffold_153:657728-658104:658295-664784:-	SE	-0.596904	0.0194805	Ppup031630	-3.75076	2.79e-36	Proton-coupled amino acid transporter 1
Ppup165960;AF:Scaffold_25:957213:958025-960599:959851:960304-960599:+	AF	-0.596986	0.0191475	Ppup165960	-4.22972	3.56e-42	Ribonucleoside-diphosphate reductase subunit M2
Ppup140770;AL:Scaffold_0:3412296-3414421:3416321:3412296-3425377:3425626:+	AL	-0.605163	0	Ppup140770	2.26518	8.12e-56	Serpin B8
Ppup096870;A3:Scaffold_103:770368-770719:770355-770719:-	A3	-0.612325	0.0114885	Ppup096870	-2.26079	0.0451605	Venom acid phosphatase Acph-1
Ppup140770;AL:Scaffold_0:3412296-3414421:3414670:3412296-3425377:3425626:+	AL	-0.616847	0	Ppup140770	2.26518	8.12e-56	Serpin B8
Ppup165960;AF:Scaffold_25:957812:958025-960599:959851:960304-960599:+	AF	-0.617168	0.0024975	Ppup165960	-4.22972	3.56e-42	Ribonucleoside-diphosphate reductase subunit M2
Ppup142430;AF:Scaffold_0:5758774:5759096-5776999:5775577:5775772-5776999:+	AF	-0.617884	0.014985	Ppup142430	3.98971	0	PDZ domain-containing protein 2
Ppup125860;AL:Scaffold_3:4873093-4873616:4873909:4873093-4874158:4876946:+	AL	-0.618189	0.0496503	Ppup125860	-5.12933	4.27e-10	Glycogenin-1
Ppup140770;AL:Scaffold_0:3412296-3423895:3424249:3412296-3425377:3425626:+	AL	-0.618478	0.00388897	Ppup140770	2.26518	8.12e-56	Serpin B8
Ppup064680;RI:Scaffold_13:3870820:3870988-3871060:3873178:-	RI	-0.621123	0.047619	Ppup064680	2.23447	5.93e-66	Putative RNA-binding protein Luc7-like 2
Ppup095470;SE:Scaffold_8:5227196-5228904:5229101-5232027:-	SE	-0.622659	0.0274725	Ppup095470	-2.18879	1.71e-14	Monocyte to macrophage differentiation factor 2
Ppup096410;RI:Scaffold_103:219916:220020-222531:222634:+	RI	-0.628856	0.0162338	Ppup096410	8.59618	4.3e-15	Kynurenine--oxoglutarate transaminase 3
Ppup140770;AL:Scaffold_0:3412296-3418230:3418551:3412296-3425377:3425882:+	AL	-0.630105	0	Ppup140770	2.26518	8.12e-56	Serpin B8
Ppup073370;A5:Scaffold_55:474145-475469:474145-475470:-	A5	-0.632479	0.003996	Ppup073370	-2.53142	0.0476289	Synaptic vesicle glycoprotein 2B
Ppup135110;AL:Scaffold_19:3802268:3804366-3814951:3811733:3812288-3814951:-	AL	-0.642586	0.0370879	Ppup135110	-2.25109	1.02e-115	Dynamin
Ppup011730;AF:Scaffold_4:8256008:8256437-8260386:8259381:8259489-8260386:+	AF	-0.647792	0.0337163	Ppup011730	-4.3848	1.81e-47	Protein Smaug homolog 1
Ppup165760;SE:Scaffold_25:788237-788322:788379-792002:-	SE	-0.648481	0.000499501	Ppup165760	4.62181	6.83e-65	Putative uncharacterized protein
Ppup083220;RI:Scaffold_17:1534584:1534745-1534823:1537102:-	RI	-0.658898	0.0424575	Ppup083220	-2.67189	1.51e-37	Fanconi anemia group M protein homolog
Ppup140770;AL:Scaffold_0:3412296-3420857:3421181:3412296-3425377:3425882:+	AL	-0.666673	0.00640536	Ppup140770	2.26518	8.12e-56	Serpin B8
Ppup096410;RI:Scaffold_103:219916:220006-222554:222634:+	RI	-0.670525	0.0162338	Ppup096410	8.59618	4.3e-15	Kynurenine--oxoglutarate transaminase 3
Ppup092220;RI:Scaffold_8:1911658:1912671-1913193:1913448:-	RI	-0.673404	0.00499501	Ppup092220	3.86882	2.36e-57	Putative uncharacterized protein
Ppup096410;RI:Scaffold_103:219916:220006-222531:222634:+	RI	-0.674963	0.00124875	Ppup096410	8.59618	4.3e-15	Kynurenine--oxoglutarate transaminase 3
Ppup026360;RI:Scaffold_5:2749281:2749479-2749577:2749736:+	RI	-0.675146	0.0474525	Ppup026360	-6.0019	6.12e-27	Serpin B8
Ppup096410;A5:Scaffold_103:222795-222879:222790-222879:+	A5	-0.675202	0	Ppup096410	8.59618	4.3e-15	Kynurenine--oxoglutarate transaminase 3
Ppup161120;A5:Scaffold_165:1626861-1627026:1626861-1627351:-	A5	-0.67695	0.002997	Ppup161120	11.4403	0	Putative uncharacterized protein
novelGeneAS085;RI:Scaffold_2:1697047:1697220-1697634:1698630:+	RI	-0.682725	0	novelGeneAS085	7.91135	0
Ppup140770;AL:Scaffold_0:3412296-3414421:3415671:3412296-3425377:3425626:+	AL	-0.682836	0	Ppup140770	2.26518	8.12e-56	Serpin B8
Ppup140770;AL:Scaffold_0:3412296-3417683:3418551:3412296-3425377:3425626:+	AL	-0.695363	0	Ppup140770	2.26518	8.12e-56	Serpin B8
Ppup140770;AL:Scaffold_0:3412296-3423553:3424249:3412296-3425377:3425626:+	AL	-0.695974	0.00388897	Ppup140770	2.26518	8.12e-56	Serpin B8
Ppup140770;AL:Scaffold_0:3412296-3419324:3419734:3412296-3425377:3425882:+	AL	-0.696508	0	Ppup140770	2.26518	8.12e-56	Serpin B8
Ppup133960;AF:Scaffold_19:2057940:2058614-2061681:2060695:2060801-2061681:+	AF	-0.69812	0.0314685	Ppup133960	2.17632	1.56e-75	Ankyrin-3
Ppup141120;AF:Scaffold_0:4431497:4431962-4439270:4438597:4438862-4439270:+	AF	-0.69968	0.0034965	Ppup141120	-2.17233	3.86e-15	Facilitated trehalose transporter Tret1-2 homolog
novelGeneAS031;A5:Scaffold_10:920984-921093:920984-921201:-	A5	-0.702912	0.00799201	novelGeneAS031	-6.12936	5.4e-08
Ppup140770;AL:Scaffold_0:3412296-3421381:3421655:3412296-3425377:3425882:+	AL	-0.703571	0	Ppup140770	2.26518	8.12e-56	Serpin B8
Ppup124440;SE:Scaffold_3:3381558-3382425:3382478-3384398:-	SE	-0.706098	0.0204795	Ppup124440	-3.34454	5.01e-19	Zwei Ig domain protein zig-8
Ppup135110;AL:Scaffold_19:3803152:3804366-3814951:3811733:3812288-3814951:-	AL	-0.707151	0.0311355	Ppup135110	-2.25109	1.02e-115	Dynamin
Ppup166520;AF:Scaffold_25:1506087-1506728:1506958:1506087-1508839:1509020:-	AF	-0.729262	0.0104895	Ppup166520	-2.06962	3.29e-20	Serine/threonine-protein phosphatase 6 regulatory ankyrin repeat subunit A
Ppup110800;A5:Scaffold_2:1780153-1780451:1780149-1780451:+	A5	-0.732264	0.00949051	Ppup110800	-3.53754	5.63e-23	Cytochrome b5-related protein
novelGeneAS200;RI:Scaffold_50:529972:530208-530323:530400:-	RI	-0.742092	0.015984	novelGeneAS200	-5.07396	1.73e-40
Ppup140770;AL:Scaffold_0:3412296-3418230:3418551:3412296-3425377:3425626:+	AL	-0.752734	0	Ppup140770	2.26518	8.12e-56	Serpin B8
Ppup140770;AL:Scaffold_0:3412296-3420857:3421181:3412296-3425377:3425626:+	AL	-0.760943	0	Ppup140770	2.26518	8.12e-56	Serpin B8
Ppup006660;AF:Scaffold_4:1577162:1577772-1638723:1610409:1610874-1638723:+	AF	-0.766614	0.0104895	Ppup006660	-3.83552	2.83e-35	Homeobox protein aristaless
Ppup016850;AF:Scaffold_231:257888:258438-308028:278282:278955-308028:+	AF	-0.780091	0	Ppup016850	-2.72089	2.98e-19	Cerebellar degeneration-related protein 2-like
Ppup016850;AF:Scaffold_231:257888:258438-308028:278221:278955-308028:+	AF	-0.782184	0	Ppup016850	-2.72089	2.98e-19	Cerebellar degeneration-related protein 2-like
Ppup140770;AL:Scaffold_0:3412296-3421381:3421655:3412296-3425377:3425626:+	AL	-0.813167	0	Ppup140770	2.26518	8.12e-56	Serpin B8
Ppup140770;AL:Scaffold_0:3412296-3419324:3419734:3412296-3425377:3425626:+	AL	-0.815165	0	Ppup140770	2.26518	8.12e-56	Serpin B8
Ppup133260;RI:Scaffold_19:1310077:1310192-1311030:1311362:+	RI	-0.827873	0.00333	Ppup133260	4.17939	2.06e-165	Vacuole membrane protein 1
Ppup009660;RI:Scaffold_4:5493058:5493236-5493334:5493479:+	RI	-0.83257	0.026973	Ppup009660	-5.65051	7.3e-75	Pre-mRNA cleavage complex 2 protein Pcf11
Ppup098220;AF:Scaffold_118:1129694:1129818-1139093:1136711:1136991-1139093:+	AF	-0.843771	0	Ppup098220	3.93078	2.42e-109	Tetraspanin-9
Ppup052740;AF:Scaffold_27:720613:723351-725207:723917:724195-725207:+	AF	-0.852257	0	Ppup052740	3.95097	8.39e-89	Leucine repeat adapter protein 25
Ppup160680;RI:Scaffold_165:750811:750890-750951:751184:+	RI	-0.895323	0	Ppup160680	6.71593	0	Glutathione hydrolase 1 proenzyme
Ppup011730;AF:Scaffold_4:8257431:8257599-8260386:8259381:8259489-8260386:+	AF	-0.898541	0.017982	Ppup011730	-4.3848	1.81e-47	Protein Smaug homolog 1
Ppup113610;RI:Scaffold_2:5862384:5862559-5862820:5863073:+	RI	-0.918439	0.0224775	Ppup113610	2.34234	1.65e-115	Putative phospholipase B-like lamina ancestor
novelGenePB.7774;RI:Scaffold_188:586763:587260-587507:587681:+	RI	-0.924302	0.043956	novelGenePB.7774	5.65407	2.66e-104
Ppup113610;RI:Scaffold_2:5862384:5862730-5862820:5863073:+	RI	-0.963182	0.0224775	Ppup113610	2.34234	1.65e-115	Putative phospholipase B-like lamina ancestor
Ppup124190;A3:Scaffold_3:2895713-2896241:2895713-2896375:+	A3	-0.965238	0	Ppup124190	2.97341	1.37e-51	Venom dipeptidyl peptidase 4
Ppup124190;RI:Scaffold_3:2895551:2895713-2896375:2896702:+	RI	-0.974866	0	Ppup124190	2.97341	1.37e-51	Venom dipeptidyl peptidase 4
Ppup166440;RI:Scaffold_25:1354978:1355892-1355976:1359399:+	RI	-0.989222	0.00649351	Ppup166440	-6.61949	1.26e-76	Ankyrin repeat domain-containing protein 11
Ppup021950;A5:Scaffold_35:2664972-2665164:2664972-2665210:-	A5	-0.997983	0.000999001	Ppup021950	-7.81578	4e-118	Zonadhesin
Ppup160680;AF:Scaffold_165:748647:749107-750951:750811:750890-750951:+	AF	-0.999939	0	Ppup160680	6.71593	0	Glutathione hydrolase 1 proenzyme
Ppup160680;AF:Scaffold_165:741180:741412-750951:750811:750890-750951:+	AF	-1	0	Ppup160680	6.71593	0	Glutathione hydrolase 1 proenzyme
