# Supplementary material for: Comprehensive isoform-level analysis reveals the contribution of alternative isoforms to venom evolution and repertoire diversity
Source: HighWire-hosted journal article supplement (doi:10.1101/gr.277707.123), 2023-09-01
Supplement: Supplemental_Tables_S1_to_S19.zip [file Supplemental_Table_S9.xlsx]

## Sheet: Sheet1
Supplemental_Table_S9. 50 highly reliable venom gland expressed genesthat are differentially spliced and significantly up-regulated the venom gland.
eventsid	events	Carcass-Venom_dPSI	Carcass-Venom_p-val	Annotation	pvalue	padj	geneid
Ppup028060;AL:Scaffold_5:5466764-5466950:5467223:5466764-5468832:5468937:+	AL	0.960082	0.00457876	Cystinosin homolog	2.60254	1.17e-132	Ppup028060
Ppup028060;AF:Scaffold_5:5457928:5458126-5462515:5461735:5461948-5462515:+	AF	0.941707	0	Cystinosin homolog	2.60254	1.17e-132	Ppup028060
Ppup001840;A3:Scaffold_247:272540-272809:272540-272880:+	A3	0.0184212	1	Putative uncharacterized protein	12.0704	5.16e-84	Ppup001840
Ppup001840;A5:Scaffold_247:272209-272280:272197-272280:+	A5	0.00338639	1	Putative uncharacterized protein	12.0704	5.16e-84	Ppup001840
Ppup001840;RI:Scaffold_247:272141:272197-272280:272540:+	RI	-0.00707187	1	Putative uncharacterized protein	12.0704	5.16e-84	Ppup001840
Ppup001840;RI:Scaffold_247:272141:272209-272280:272540:+	RI	nan	1	Putative uncharacterized protein	12.0704	5.16e-84	Ppup001840
Ppup133780;AF:Scaffold_19:1862277-1864761:1865053:1862277-1867520:1868401:-	AF	0.938491	0	Very long-chain-fatty-acid--CoA ligase bubblegum	2.07925	1.5e-158	Ppup133780
Ppup133780;AF:Scaffold_19:1862277-1864761:1865053:1862277-1867520:1868022:-	AF	0.921462	0.001998	Very long-chain-fatty-acid--CoA ligase bubblegum	2.07925	1.5e-158	Ppup133780
Ppup002810;RI:Scaffold_26:1633854:1634071-1634161:1634446:-	RI	nan	1	Alpha-amylase 2	8.99251	0	Ppup002810
Ppup002810;RI:Scaffold_26:1633854:1634083-1634161:1634446:-	RI	-0.0158065	1	Alpha-amylase 2	8.99251	0	Ppup002810
Ppup002810;RI:Scaffold_26:1634161:1634446-1634562:1634952:-	RI	0.00129235	1	Alpha-amylase 2	8.99251	0	Ppup002810
Ppup002810;RI:Scaffold_26:1634161:1634446-1634562:1635454:-	RI	nan	1	Alpha-amylase 2	8.99251	0	Ppup002810
Ppup002810;RI:Scaffold_26:1634161:1634952-1635024:1635454:-	RI	nan	1	Alpha-amylase 2	8.99251	0	Ppup002810
Ppup002810;RI:Scaffold_26:1634562:1634952-1635024:1635454:-	RI	-0.0610271	0.0779221	Alpha-amylase 2	8.99251	0	Ppup002810
Ppup133260;AF:Scaffold_19:1310077:1310192-1311030:1310475:1310797-1311030:+	AF	0.904087	0.00333	Vacuole membrane protein 1	4.17939	2.06e-165	Ppup133260
Ppup003240;A3:Scaffold_26:2076962-2078054:2076962-2078196:+	A3	0.0277637	1	Natterin-3	4.57869	1.22e-88	Ppup003240
Ppup003240;RI:Scaffold_26:2076893:2076962-2078054:2078395:+	RI	0.0119313	1	Natterin-3	4.57869	1.22e-88	Ppup003240
Ppup003240;RI:Scaffold_26:2076893:2076962-2078196:2078395:+	RI	0.00148367	1	Natterin-3	4.57869	1.22e-88	Ppup003240
Ppup028060;RI:Scaffold_5:5466662:5466764-5468832:5468937:+	RI	0.860166	0.00457876	Cystinosin homolog	2.60254	1.17e-132	Ppup028060
Ppup028060;AL:Scaffold_5:5466764-5466950:5467223:5466764-5467429:5468080:+	AL	0.796597	0.00457876	Cystinosin homolog	2.60254	1.17e-132	Ppup028060
Ppup006060;A5:Scaffold_4:1063741-1065297:1063720-1065297:+	A5	-0.248106	0.13986	Tumor protein D54	2.20604	4.11e-213	Ppup006060
Ppup006060;A5:Scaffold_4:1067316-1070333:1066341-1070333:+	A5	0.00612145	1	Tumor protein D54	2.20604	4.11e-213	Ppup006060
Ppup006060;AF:Scaffold_4:1055841:1056176-1065297:1062129:1063720-1065297:+	AF	-0.00172583	1	Tumor protein D54	2.20604	4.11e-213	Ppup006060
Ppup006060;AF:Scaffold_4:1055841:1056176-1065297:1062129:1063741-1065297:+	AF	0.0120269	1	Tumor protein D54	2.20604	4.11e-213	Ppup006060
Ppup006060;RI:Scaffold_4:1066193:1066341-1067257:1067316:+	RI	0.00993472	1	Tumor protein D54	2.20604	4.11e-213	Ppup006060
Ppup006060;RI:Scaffold_4:1066193:1066341-1070333:1070495:+	RI	0.0814704	0.115884	Tumor protein D54	2.20604	4.11e-213	Ppup006060
Ppup006060;RI:Scaffold_4:1066193:1067316-1070333:1070495:+	RI	-0.000906871	1	Tumor protein D54	2.20604	4.11e-213	Ppup006060
Ppup081600;RI:Scaffold_17:81080:81605-81938:82050:+	RI	0.766404	0.023976	Serine protease 55	11.9115	2.54e-34	Ppup081600
Ppup109070;A3:Scaffold_260:307038-307369:307025-307369:-	A3	0.74857	0	Fatty acyl-CoA reductase 1	5.24017	3.74e-97	Ppup109070
Ppup133780;AF:Scaffold_19:1862277-1866244:1866383:1862277-1867520:1868401:-	AF	0.722168	0.001998	Very long-chain-fatty-acid--CoA ligase bubblegum	2.07925	1.5e-158	Ppup133780
Ppup028060;AL:Scaffold_5:5466764-5467429:5468080:5466764-5468832:5468937:+	AL	0.721014	0.00457876	Cystinosin homolog	2.60254	1.17e-132	Ppup028060
Ppup141990;MX:Scaffold_0:4974221-5003034:5003539-5082458:4974221-5041870:5042099-5082458:+	MX	0.670078	0.0472028	Putative uncharacterized protein	4.19247	0	Ppup141990
Ppup133780;AF:Scaffold_19:1862277-1864761:1865053:1862277-1866244:1866383:-	AF	0.667647	0.003885	Very long-chain-fatty-acid--CoA ligase bubblegum	2.07925	1.5e-158	Ppup133780
Ppup140770;AL:Scaffold_0:3412296-3425377:3425626:3412296-3426218:3426535:+	AL	0.665564	0	Serpin B8	2.26518	8.12e-56	Ppup140770
novelGeneAS085;RI:Scaffold_2:1697634:1697709-1698273:1698630:+	RI	0.662132	0.0014985		7.91135	0	novelGeneAS085
Ppup008700;AF:Scaffold_4:4024965:4025198-4029417:4025949:4026389-4029417:+	AF	-0.00112869	1	Protein lifeguard 1	3.08229	9e-186	Ppup008700
Ppup008700;AF:Scaffold_4:4024965:4025198-4029417:4028676:4028705-4029417:+	AF	-0.00143541	1	Protein lifeguard 1	3.08229	9e-186	Ppup008700
Ppup008700;AF:Scaffold_4:4025949:4026389-4029417:4028676:4028705-4029417:+	AF	-0.0370479	1	Protein lifeguard 1	3.08229	9e-186	Ppup008700
Ppup133960;RI:Scaffold_19:2072848:2072899-2074808:2075259:+	RI	0.632542	0.0314685	Ankyrin-3	2.17632	1.56e-75	Ppup133960
Ppup028060;AF:Scaffold_5:5457928:5458013-5462515:5461735:5461948-5462515:+	AF	0.615272	0.00457876	Cystinosin homolog	2.60254	1.17e-132	Ppup028060
Ppup019220;RI:Scaffold_28:2346072:2346343-2346430:2346499:+	RI	0.615165	0.00899101	Beta-1,3-glucan-binding protein	10.9497	1.49e-31	Ppup019220
Ppup010390;RI:Scaffold_4:6460277:6460606-6460691:6460947:+	RI	0.00465597	1	Leukocyte elastase inhibitor	4.33572	1.8e-189	Ppup010390
Ppup063140;A5:Scaffold_13:2129399-2141186:2129399-2141389:-	A5	0.607092	0.035964	Serine proteinase stubble	2.37376	5.41e-119	Ppup063140
Ppup092220;AF:Scaffold_8:1912671-1913193:1913448:1912671-1913892:1913984:-	AF	0.596376	0	Putative uncharacterized protein	3.86882	2.36e-57	Ppup092220
Ppup028060;RI:Scaffold_5:5466662:5466764-5467429:5468080:+	RI	0.587647	0.00824176	Cystinosin homolog	2.60254	1.17e-132	Ppup028060
Ppup049670_Ppup049680;AF:Scaffold_21:2082832:2082988-2086486:2083294:2083452-2086486:+	AF	0.584867	0		10.4421	0	Ppup049670_Ppup049680
Ppup140770;AL:Scaffold_0:3412296-3425377:3425626:3412296-3426218:3426665:+	AL	0.556202	0	Serpin B8	2.26518	8.12e-56	Ppup140770
Ppup019220;RI:Scaffold_28:2346574:2346801-2346874:2347094:+	RI	-0.0040759	1	Beta-1,3-glucan-binding protein	10.9497	1.49e-31	Ppup019220
Ppup019220;RI:Scaffold_28:2347173:2347306-2347390:2347882:+	RI	0.0200102	1	Beta-1,3-glucan-binding protein	10.9497	1.49e-31	Ppup019220
Ppup133260;RI:Scaffold_19:1310475:1310797-1311030:1311362:+	RI	0.507237	0.0262238	Vacuole membrane protein 1	4.17939	2.06e-165	Ppup133260
Ppup140770;AL:Scaffold_0:3412296-3416586:3418205:3412296-3423553:3424249:+	AL	0.5005	0.0471861	Serpin B8	2.26518	8.12e-56	Ppup140770
novelGenePB.2583;AF:Scaffold_6:3027597:3027755-3033032:3028993:3029164-3033032:+	AF	0.498976	0		5.21067	1.47e-252	novelGenePB.2583
Ppup140770;AL:Scaffold_0:3412296-3425377:3425882:3412296-3426218:3426535:+	AL	0.498707	0	Serpin B8	2.26518	8.12e-56	Ppup140770
Ppup133960;RI:Scaffold_19:2073410:2073640-2074808:2075337:+	RI	0.498068	0.0314685	Ankyrin-3	2.17632	1.56e-75	Ppup133960
Ppup021370;RI:Scaffold_35:1882242:1882365-1883230:1883364:+	RI	-0.0353526	1	Ester hydrolase C11orf54 homolog	4.99823	1.25e-195	Ppup021370
Ppup021370;RI:Scaffold_35:1882242:1883364-1883476:1883574:+	RI	0.0108518	1	Ester hydrolase C11orf54 homolog	4.99823	1.25e-195	Ppup021370
Ppup021370_Ppup021380;RI:Scaffold_35:1882242:1882365-1883230:1883364:+	RI	0.333333	0.0509491		3.72666	6.47e-62	Ppup021370_Ppup021380
Ppup140770;AL:Scaffold_0:3412296-3414421:3416321:3412296-3421381:3421655:+	AL	0.491861	0	Serpin B8	2.26518	8.12e-56	Ppup140770
Ppup140770;AL:Scaffold_0:3412296-3414421:3414670:3412296-3421381:3421655:+	AL	0.478981	0	Serpin B8	2.26518	8.12e-56	Ppup140770
Ppup133960;A3:Scaffold_19:2072899-2073410:2072899-2074808:+	A3	0.477644	0.0314685	Ankyrin-3	2.17632	1.56e-75	Ppup133960
Ppup028060;AF:Scaffold_5:5457928:5458013-5462515:5461487:5461948-5462515:+	AF	nan	1	Cystinosin homolog	2.60254	1.17e-132	Ppup028060
Ppup028060;RI:Scaffold_5:5461487:5461948-5462515:5462570:+	RI	0.0415857	1	Cystinosin homolog	2.60254	1.17e-132	Ppup028060
Ppup028060;RI:Scaffold_5:5463351:5463464-5463644:5463826:+	RI	-0.0243213	1	Cystinosin homolog	2.60254	1.17e-132	Ppup028060
Ppup028060;RI:Scaffold_5:5466662:5466764-5466950:5467223:+	RI	nan	1	Cystinosin homolog	2.60254	1.17e-132	Ppup028060
Ppup140770;AL:Scaffold_0:3412296-3425377:3425882:3412296-3426218:3426665:+	AL	0.446974	0.00907426	Serpin B8	2.26518	8.12e-56	Ppup140770
Ppup109070;AF:Scaffold_260:308883-309172:309422:308883-309833:310106:-	AF	0.426174	0.000499501	Fatty acyl-CoA reductase 1	5.24017	3.74e-97	Ppup109070
Ppup133780;AF:Scaffold_19:1862277-1864761:1865053:1862277-1867520:1867828:-	AF	0.423094	0.00174825	Very long-chain-fatty-acid--CoA ligase bubblegum	2.07925	1.5e-158	Ppup133780
Ppup140770;AL:Scaffold_0:3412296-3417683:3418002:3412296-3421381:3421655:+	AL	0.378653	0	Serpin B8	2.26518	8.12e-56	Ppup140770
Ppup044750;A3:Scaffold_1:2947589-2947674:2947589-2948039:+	A3	nan	1	Putative uncharacterized protein	11.7217	5.23e-26	Ppup044750
Ppup044750;A3:Scaffold_1:2949412-2949490:2949412-2949501:+	A3	-0.00546281	1	Putative uncharacterized protein	11.7217	5.23e-26	Ppup044750
Ppup044750;A5:Scaffold_1:2947815-2948039:2947589-2948039:+	A5	nan	1	Putative uncharacterized protein	11.7217	5.23e-26	Ppup044750
Ppup044750;RI:Scaffold_1:2945014:2945457-2946146:2946942:+	RI	nan	1	Putative uncharacterized protein	11.7217	5.23e-26	Ppup044750
Ppup044750;RI:Scaffold_1:2946878:2946942-2947020:2947815:+	RI	nan	1	Putative uncharacterized protein	11.7217	5.23e-26	Ppup044750
Ppup044750;RI:Scaffold_1:2946878:2946942-2947020:2950008:+	RI	nan	1	Putative uncharacterized protein	11.7217	5.23e-26	Ppup044750
Ppup044750;RI:Scaffold_1:2947020:2947589-2947674:2947815:+	RI	-0.0413682	1	Putative uncharacterized protein	11.7217	5.23e-26	Ppup044750
Ppup044750;RI:Scaffold_1:2947020:2947589-2947674:2948176:+	RI	nan	1	Putative uncharacterized protein	11.7217	5.23e-26	Ppup044750
Ppup044750;RI:Scaffold_1:2947020:2947589-2947674:2948259:+	RI	nan	1	Putative uncharacterized protein	11.7217	5.23e-26	Ppup044750
Ppup044750;RI:Scaffold_1:2947020:2947589-2947674:2948848:+	RI	nan	1	Putative uncharacterized protein	11.7217	5.23e-26	Ppup044750
Ppup044750;RI:Scaffold_1:2947020:2947589-2948039:2948176:+	RI	nan	1	Putative uncharacterized protein	11.7217	5.23e-26	Ppup044750
Ppup044750;RI:Scaffold_1:2947020:2947815-2948039:2948176:+	RI	nan	1	Putative uncharacterized protein	11.7217	5.23e-26	Ppup044750
Ppup044750;RI:Scaffold_1:2947020:2948176-2948331:2948557:+	RI	nan	1	Putative uncharacterized protein	11.7217	5.23e-26	Ppup044750
Ppup044750;RI:Scaffold_1:2947020:2948176-2948331:2948848:+	RI	nan	1	Putative uncharacterized protein	11.7217	5.23e-26	Ppup044750
Ppup044750;RI:Scaffold_1:2947020:2948176-2948331:2949412:+	RI	nan	1	Putative uncharacterized protein	11.7217	5.23e-26	Ppup044750
Ppup044750;RI:Scaffold_1:2947020:2948176-2948331:2950008:+	RI	nan	1	Putative uncharacterized protein	11.7217	5.23e-26	Ppup044750
Ppup044750;RI:Scaffold_1:2947020:2948557-2948631:2948848:+	RI	nan	1	Putative uncharacterized protein	11.7217	5.23e-26	Ppup044750
Ppup044750;RI:Scaffold_1:2947020:2948848-2948957:2949412:+	RI	nan	1	Putative uncharacterized protein	11.7217	5.23e-26	Ppup044750
Ppup044750;RI:Scaffold_1:2947020:2948848-2948957:2950008:+	RI	nan	1	Putative uncharacterized protein	11.7217	5.23e-26	Ppup044750
Ppup044750;RI:Scaffold_1:2947020:2949412-2949490:2950008:+	RI	nan	1	Putative uncharacterized protein	11.7217	5.23e-26	Ppup044750
Ppup044750;RI:Scaffold_1:2947674:2947815-2948039:2948176:+	RI	0.000638914	1	Putative uncharacterized protein	11.7217	5.23e-26	Ppup044750
Ppup044750;RI:Scaffold_1:2947674:2947815-2948039:2948259:+	RI	nan	1	Putative uncharacterized protein	11.7217	5.23e-26	Ppup044750
Ppup044750;RI:Scaffold_1:2947674:2948176-2948331:2948848:+	RI	nan	1	Putative uncharacterized protein	11.7217	5.23e-26	Ppup044750
Ppup044750;RI:Scaffold_1:2948039:2948176-2948331:2948557:+	RI	0.00133276	1	Putative uncharacterized protein	11.7217	5.23e-26	Ppup044750
Ppup044750;RI:Scaffold_1:2948039:2948176-2948388:2948557:+	RI	nan	1	Putative uncharacterized protein	11.7217	5.23e-26	Ppup044750
Ppup044750;RI:Scaffold_1:2948331:2948557-2948631:2948848:+	RI	0.013269	1	Putative uncharacterized protein	11.7217	5.23e-26	Ppup044750
Ppup044750;RI:Scaffold_1:2948331:2948557-2948631:2949412:+	RI	nan	1	Putative uncharacterized protein	11.7217	5.23e-26	Ppup044750
Ppup044750;RI:Scaffold_1:2948331:2948557-2948631:2950008:+	RI	nan	1	Putative uncharacterized protein	11.7217	5.23e-26	Ppup044750
Ppup044750;RI:Scaffold_1:2948331:2948848-2948957:2949412:+	RI	nan	1	Putative uncharacterized protein	11.7217	5.23e-26	Ppup044750
Ppup044750;RI:Scaffold_1:2948331:2948848-2948957:2950008:+	RI	nan	1	Putative uncharacterized protein	11.7217	5.23e-26	Ppup044750
Ppup044750;RI:Scaffold_1:2948331:2949412-2949490:2950008:+	RI	nan	1	Putative uncharacterized protein	11.7217	5.23e-26	Ppup044750
Ppup044750;RI:Scaffold_1:2948631:2948848-2948957:2949412:+	RI	0.00631595	1	Putative uncharacterized protein	11.7217	5.23e-26	Ppup044750
Ppup044750;RI:Scaffold_1:2948631:2948848-2948957:2950008:+	RI	nan	1	Putative uncharacterized protein	11.7217	5.23e-26	Ppup044750
Ppup044750;RI:Scaffold_1:2948631:2949412-2949490:2950008:+	RI	nan	1	Putative uncharacterized protein	11.7217	5.23e-26	Ppup044750
Ppup044750;RI:Scaffold_1:2948957:2949412-2949490:2950008:+	RI	0.0236986	1	Putative uncharacterized protein	11.7217	5.23e-26	Ppup044750
Ppup044750;RI:Scaffold_1:2948957:2949412-2949501:2950008:+	RI	nan	1	Putative uncharacterized protein	11.7217	5.23e-26	Ppup044750
Ppup094310;AF:Scaffold_8:4092841-4094036:4094318:4092841-4097991:4098228:-	AF	0.341858	0.0024975	Zinc transporter ZIP3	6.72028	0	Ppup094310
Ppup057710;A5:Scaffold_6:672498-672565:672475-672565:+	A5	0.333252	0.0134865	Putative uncharacterized protein	7.54327	1.66e-163	Ppup057710
Ppup124350;RI:Scaffold_3:3215560:3216145-3216204:3216970:+	RI	0.332943	0.00999001	Transcription factor LBX1	9.33113	0	Ppup124350
novelGenePB.3969;A3:Scaffold_17:213959-214223:213932-214223:-	A3	0.331148	0.035964		11.0936	4.46e-49	novelGenePB.3969
Ppup043010;RI:Scaffold_1:69616:69720-69817:70024:+	RI	0.328308	0.00949051	Adenosine deaminase 2	11.2578	4.76e-30	Ppup043010
Ppup136900;A3:Scaffold_33:993583-1006948:993508-1006948:-	A3	0.326892	0.025308	Venom acid phosphatase Acph-1	11.1676	5.67e-120	Ppup136900
Ppup117110;A3:Scaffold_50:903594-903724:903582-903724:-	A3	0.322127	0.0034965	Lipase 1	11.8283	2.32e-36	Ppup117110
Ppup028060;AF:Scaffold_5:5457928:5458126-5462515:5461487:5461948-5462515:+	AF	0.309756	0.037851	Cystinosin homolog	2.60254	1.17e-132	Ppup028060
Ppup141990;SE:Scaffold_0:5003539-5056071:5056126-5082458:+	SE	0.304933	0.0472028	Putative uncharacterized protein	4.19247	0	Ppup141990
Ppup140770;AL:Scaffold_0:3412296-3414421:3414670:3412296-3419324:3419734:+	AL	0.29309	0.0278559	Serpin B8	2.26518	8.12e-56	Ppup140770
novelGenePB.5711;SE:Scaffold_33:406753-407813:407875-409659:-	SE	0.285443	0.014985		2.76998	1.7e-240	novelGenePB.5711
Ppup057710;A3:Scaffold_6:672498-672546:672498-672565:+	A3	nan	1	Putative uncharacterized protein	7.54327	1.66e-163	Ppup057710
Ppup057710;A3:Scaffold_6:672498-672546:672498-672608:+	A3	nan	1	Putative uncharacterized protein	7.54327	1.66e-163	Ppup057710
Ppup057710;A3:Scaffold_6:672498-672565:672498-672608:+	A3	nan	1	Putative uncharacterized protein	7.54327	1.66e-163	Ppup057710
Ppup057710;RI:Scaffold_6:671749:671901-671980:672035:+	RI	0.000387018	1	Putative uncharacterized protein	7.54327	1.66e-163	Ppup057710
Ppup057710;RI:Scaffold_6:671980:672035-672139:672188:+	RI	0.00817661	1	Putative uncharacterized protein	7.54327	1.66e-163	Ppup057710
Ppup057710;RI:Scaffold_6:672261:672475-672565:672725:+	RI	nan	1	Putative uncharacterized protein	7.54327	1.66e-163	Ppup057710
Ppup057710;RI:Scaffold_6:672261:672498-672546:672725:+	RI	nan	1	Putative uncharacterized protein	7.54327	1.66e-163	Ppup057710
Ppup057710;RI:Scaffold_6:672261:672498-672565:672725:+	RI	nan	1	Putative uncharacterized protein	7.54327	1.66e-163	Ppup057710
Ppup057710;RI:Scaffold_6:672261:672498-672608:672725:+	RI	nan	1	Putative uncharacterized protein	7.54327	1.66e-163	Ppup057710
Ppup057710;RI:Scaffold_6:672261:672502-672560:672725:+	RI	nan	1	Putative uncharacterized protein	7.54327	1.66e-163	Ppup057710
Ppup001840;A3:Scaffold_247:269452-269699:269452-269718:+	A3	0.281031	0.00799201	Putative uncharacterized protein	12.0704	5.16e-84	Ppup001840
Ppup140770;AL:Scaffold_0:3412296-3414421:3416321:3412296-3419324:3419734:+	AL	0.27617	0.014715	Serpin B8	2.26518	8.12e-56	Ppup140770
Ppup028060;A5:Scaffold_5:5458126-5462515:5458013-5462515:+	A5	0.267451	0.00824176	Cystinosin homolog	2.60254	1.17e-132	Ppup028060
Ppup061580;RI:Scaffold_126:22981:23587-23687:25810:+	RI	0.0185206	1	Endoplasmin	2.93948	4.22e-10	Ppup061580
Ppup140770;AL:Scaffold_0:3412296-3416586:3418205:3412296-3419324:3419734:+	AL	0.258667	0.0474203	Serpin B8	2.26518	8.12e-56	Ppup140770
Ppup063140;AF:Scaffold_13:2129399-2141186:2141482:2129399-2141633:2141739:-	AF	0.00364043	1	Serine proteinase stubble	2.37376	5.41e-119	Ppup063140
Ppup063140;SE:Scaffold_13:2129399-2141389:2141573-2141633:-	SE	-0.0103712	1	Serine proteinase stubble	2.37376	5.41e-119	Ppup063140
Ppup081600;A5:Scaffold_17:76205-76537:76183-76537:+	A5	0.253034	0.00799201	Serine protease 55	11.9115	2.54e-34	Ppup081600
Ppup140770;AL:Scaffold_0:3412296-3418230:3418551:3412296-3421381:3421655:+	AL	0.247085	0.0265588	Serpin B8	2.26518	8.12e-56	Ppup140770
Ppup133780;AF:Scaffold_19:1862277-1866244:1866383:1862277-1867520:1867828:-	AF	0.237562	0.001998	Very long-chain-fatty-acid--CoA ligase bubblegum	2.07925	1.5e-158	Ppup133780
Ppup140770;AL:Scaffold_0:3412296-3414421:3414670:3412296-3420857:3421181:+	AL	0.237367	0.0384322	Serpin B8	2.26518	8.12e-56	Ppup140770
Ppup070660;A3:Scaffold_30:562728-562808:562700-562808:-	A3	nan	1	Pancreatic lipase-related protein 2	4.66614	0	Ppup070660
Ppup070660;RI:Scaffold_30:556853:556978-557268:557288:-	RI	-0.157305	0.0621878	Pancreatic lipase-related protein 2	4.66614	0	Ppup070660
Ppup070660;RI:Scaffold_30:557974:558281-558826:558929:-	RI	0.0284258	1	Pancreatic lipase-related protein 2	4.66614	0	Ppup070660
Ppup070660;RI:Scaffold_30:562947:563254-563528:563631:-	RI	nan	1	Pancreatic lipase-related protein 2	4.66614	0	Ppup070660
Ppup070660;RI:Scaffold_30:562947:563631-563908:564167:-	RI	nan	1	Pancreatic lipase-related protein 2	4.66614	0	Ppup070660
Ppup070660;RI:Scaffold_30:562947:564167-564284:564455:-	RI	nan	1	Pancreatic lipase-related protein 2	4.66614	0	Ppup070660
Ppup071220;A5:Scaffold_30:1614937-1615276:1614937-1615286:-	A5	nan	1	Putative uncharacterized protein	10.9993	0	Ppup071220
Ppup071220;RI:Scaffold_30:1625716:1625837-1626479:1626661:-	RI	nan	1	Putative uncharacterized protein	10.9993	0	Ppup071220
Ppup140770;AL:Scaffold_0:3412296-3417683:3418551:3412296-3421381:3421655:+	AL	0.234644	0.0384322	Serpin B8	2.26518	8.12e-56	Ppup140770
Ppup140770;AL:Scaffold_0:3412296-3414421:3416321:3412296-3420857:3421181:+	AL	0.22638	0.0338772	Serpin B8	2.26518	8.12e-56	Ppup140770
novelGenePB.5711;MX:Scaffold_33:410282-413071:413177-418082:410282-414003:414148-418082:-	MX	0.216256	0.014985		2.76998	1.7e-240	novelGenePB.5711
Ppup070660;RI:Scaffold_30:559557:559978-560058:560633:-	RI	0.209992	0.0104895	Pancreatic lipase-related protein 2	4.66614	0	Ppup070660
Ppup140770;AL:Scaffold_0:3412296-3414421:3414670:3412296-3418230:3418551:+	AL	0.192559	0.0390364	Serpin B8	2.26518	8.12e-56	Ppup140770
Ppup081600;A3:Scaffold_17:76205-76522:76205-76537:+	A3	nan	1	Serine protease 55	11.9115	2.54e-34	Ppup081600
Ppup081600;A3:Scaffold_17:76209-76522:76209-76537:+	A3	0.0196679	1	Serine protease 55	11.9115	2.54e-34	Ppup081600
Ppup081600;A5:Scaffold_17:76209-76522:76205-76522:+	A5	nan	1	Serine protease 55	11.9115	2.54e-34	Ppup081600
Ppup081600;A5:Scaffold_17:76209-76537:76183-76537:+	A5	-0.0233567	1	Serine protease 55	11.9115	2.54e-34	Ppup081600
Ppup133960;SE:Scaffold_19:2094149-2096851:2097085-2098814:+	SE	0.185919	0.0314685	Ankyrin-3	2.17632	1.56e-75	Ppup133960
Ppup081600;A5:Scaffold_17:76468-76537:76183-76537:+	A5	0.0325897	1	Serine protease 55	11.9115	2.54e-34	Ppup081600
Ppup081600;A5:Scaffold_17:76468-76537:76205-76537:+	A5	nan	1	Serine protease 55	11.9115	2.54e-34	Ppup081600
Ppup081600;A5:Scaffold_17:76468-76537:76209-76537:+	A5	0.00320959	1	Serine protease 55	11.9115	2.54e-34	Ppup081600
Ppup081600;A5:Scaffold_17:81869-81938:81605-81938:+	A5	0.154446	0.10618	Serine protease 55	11.9115	2.54e-34	Ppup081600
Ppup081600;AF:Scaffold_17:76129:76183-81938:80451:80636-81938:+	AF	0.0479694	1	Serine protease 55	11.9115	2.54e-34	Ppup081600
Ppup081600;AF:Scaffold_17:76129:76183-81938:81569:81869-81938:+	AF	nan	1	Serine protease 55	11.9115	2.54e-34	Ppup081600
Ppup081600;AF:Scaffold_17:80451:80636-81938:81569:81869-81938:+	AF	-0.167448	0.0932401	Serine protease 55	11.9115	2.54e-34	Ppup081600
Ppup081600;RI:Scaffold_17:77139:77417-77515:77796:+	RI	0.00271927	1	Serine protease 55	11.9115	2.54e-34	Ppup081600
Ppup140770;AL:Scaffold_0:3412296-3414421:3416321:3412296-3418230:3418551:+	AL	0.185688	0.0347525	Serpin B8	2.26518	8.12e-56	Ppup140770
Ppup081600;RI:Scaffold_17:81938:82050-82134:82453:+	RI	0.0169094	1	Serine protease 55	11.9115	2.54e-34	Ppup081600
Ppup081600;RI:Scaffold_17:82539:82814-82994:83710:+	RI	0.0527468	0.163836	Serine protease 55	11.9115	2.54e-34	Ppup081600
Ppup081600;RI:Scaffold_17:82994:83230-83565:84189:+	RI	-0.0561216	0.269064	Serine protease 55	11.9115	2.54e-34	Ppup081600
Ppup081600;SE:Scaffold_17:80636-81388:81605-81938:+	SE	0.202099	0.0751249	Serine protease 55	11.9115	2.54e-34	Ppup081600
Ppup081600_Ppup081590;A3:Scaffold_17:73015-73230:73015-73237:+	A3	nan	1		7.81977	1.3e-22	Ppup081600_Ppup081590
Ppup081600_Ppup081590;A3:Scaffold_17:73169-73215:73169-73230:+	A3	nan	1		7.81977	1.3e-22	Ppup081600_Ppup081590
Ppup081600_Ppup081590;A5:Scaffold_17:70661-72127:70606-72127:+	A5	-0.378064	0.23976		7.81977	1.3e-22	Ppup081600_Ppup081590
Ppup081600_Ppup081590;A5:Scaffold_17:73169-73230:73015-73230:+	A5	nan	1		7.81977	1.3e-22	Ppup081600_Ppup081590
Ppup081600_Ppup081590;A5:Scaffold_17:73343-73418:73338-73418:+	A5	-0.0447304	1		7.81977	1.3e-22	Ppup081600_Ppup081590
Ppup081600_Ppup081590;RI:Scaffold_17:72127:72402-72527:72649:+	RI	-0.154826	0.303447		7.81977	1.3e-22	Ppup081600_Ppup081590
Ppup081600_Ppup081590;RI:Scaffold_17:72127:72649-72716:72833:+	RI	nan	1		7.81977	1.3e-22	Ppup081600_Ppup081590
Ppup083190;A3:Scaffold_17:1524512-1524763:1524512-1524879:+	A3	nan	1	Kynurenine--oxoglutarate transaminase 1	10.6462	1.2e-40	Ppup083190
Ppup083190;A3:Scaffold_17:1524557-1524728:1524557-1524763:+	A3	nan	1	Kynurenine--oxoglutarate transaminase 1	10.6462	1.2e-40	Ppup083190
Ppup083190;A3:Scaffold_17:1524557-1524728:1524557-1524879:+	A3	nan	1	Kynurenine--oxoglutarate transaminase 1	10.6462	1.2e-40	Ppup083190
Ppup083190;A3:Scaffold_17:1524557-1524763:1524557-1524879:+	A3	nan	1	Kynurenine--oxoglutarate transaminase 1	10.6462	1.2e-40	Ppup083190
Ppup083190;A5:Scaffold_17:1524557-1524763:1524512-1524763:+	A5	nan	1	Kynurenine--oxoglutarate transaminase 1	10.6462	1.2e-40	Ppup083190
Ppup083190;A5:Scaffold_17:1524557-1524879:1524512-1524879:+	A5	nan	1	Kynurenine--oxoglutarate transaminase 1	10.6462	1.2e-40	Ppup083190
Ppup083190;RI:Scaffold_17:1525152:1525203-1526323:1526384:+	RI	nan	1	Kynurenine--oxoglutarate transaminase 1	10.6462	1.2e-40	Ppup083190
Ppup083190;RI:Scaffold_17:1525152:1525325-1526323:1526384:+	RI	-0.2533	0.0659341	Kynurenine--oxoglutarate transaminase 1	10.6462	1.2e-40	Ppup083190
Ppup083190;RI:Scaffold_17:1525152:1526384-1526462:1526541:+	RI	nan	1	Kynurenine--oxoglutarate transaminase 1	10.6462	1.2e-40	Ppup083190
Ppup083190;RI:Scaffold_17:1526860:1527096-1527166:1527403:+	RI	0.00049404	1	Kynurenine--oxoglutarate transaminase 1	10.6462	1.2e-40	Ppup083190
Ppup083190;RI:Scaffold_17:1527773:1528114-1528200:1528729:+	RI	nan	1	Kynurenine--oxoglutarate transaminase 1	10.6462	1.2e-40	Ppup083190
Ppup083200_Ppup083190;RI:Scaffold_17:1528200:1528689-1529508:1529562:+	RI	nan	1		10.9414	3.47e-102	Ppup083200_Ppup083190
Ppup140770;AL:Scaffold_0:3412296-3416586:3418205:3412296-3421381:3421655:+	AL	0.169366	0.0466676	Serpin B8	2.26518	8.12e-56	Ppup140770
Ppup170900;RI:Scaffold_529:39624:39821-39906:39926:+	RI	0.138869	0.010989	Putative uncharacterized protein	11.0855	2.49e-38	Ppup170900
Ppup044750;SE:Scaffold_1:2947589-2947674:2947815-2948039:+	SE	0.135905	0.0274725	Putative uncharacterized protein	11.7217	5.23e-26	Ppup044750
Ppup139080;RI:Scaffold_0:795251:795310-795956:796213:+	RI	0.115063	0.030969	ATP-dependent RNA helicase p62	2.47771	2.66e-65	Ppup139080
Ppup094310;AF:Scaffold_8:4092841-4094036:4094318:4092841-4100927:4100986:-	AF	0.108424	0.0424575	Zinc transporter ZIP3	6.72028	0	Ppup094310
Ppup140770;AL:Scaffold_0:3412296-3417683:3418002:3412296-3419324:3419734:+	AL	0.102796	0.0471861	Serpin B8	2.26518	8.12e-56	Ppup140770
Ppup094310;AF:Scaffold_8:4092841-4097991:4098228:4092841-4100927:4100986:-	AF	0.0401422	1	Zinc transporter ZIP3	6.72028	0	Ppup094310
Ppup094310;RI:Scaffold_8:4090507:4090662-4090899:4091096:-	RI	6.71e-05	1	Zinc transporter ZIP3	6.72028	0	Ppup094310
Ppup094310;RI:Scaffold_8:4090899:4091096-4091428:4091595:-	RI	-0.0356653	1	Zinc transporter ZIP3	6.72028	0	Ppup094310
Ppup139080;RI:Scaffold_0:796637:796838-797131:797370:+	RI	0.0873574	0.030969	ATP-dependent RNA helicase p62	2.47771	2.66e-65	Ppup139080
Ppup049670_Ppup049680;SE:Scaffold_21:2082988-2083369:2083452-2086486:+	SE	0.083799	0.030969		10.4421	0	Ppup049670_Ppup049680
Ppup044750;A3:Scaffold_1:2948176-2948331:2948176-2948388:+	A3	0.0775214	0.04329	Putative uncharacterized protein	11.7217	5.23e-26	Ppup044750
Ppup096400;A5:Scaffold_103:217710-217816:217642-217816:+	A5	nan	1	Kynurenine--oxoglutarate transaminase 1	9.71819	2.64e-24	Ppup096400
Ppup096400;RI:Scaffold_103:215421:215746-215942:216034:+	RI	nan	1	Kynurenine--oxoglutarate transaminase 1	9.71819	2.64e-24	Ppup096400
Ppup096400;RI:Scaffold_103:215421:215857-215942:216034:+	RI	nan	1	Kynurenine--oxoglutarate transaminase 1	9.71819	2.64e-24	Ppup096400
Ppup096400;RI:Scaffold_103:215421:216034-216113:216317:+	RI	nan	1	Kynurenine--oxoglutarate transaminase 1	9.71819	2.64e-24	Ppup096400
Ppup096400;RI:Scaffold_103:215421:216317-216381:216527:+	RI	nan	1	Kynurenine--oxoglutarate transaminase 1	9.71819	2.64e-24	Ppup096400
Ppup096400;RI:Scaffold_103:217377:217642-217816:218009:+	RI	-0.119171	0.208292	Kynurenine--oxoglutarate transaminase 1	9.71819	2.64e-24	Ppup096400
Ppup096400;RI:Scaffold_103:217377:217710-217816:218009:+	RI	0	1	Kynurenine--oxoglutarate transaminase 1	9.71819	2.64e-24	Ppup096400
Ppup096400;RI:Scaffold_103:217377:217710-217816:218076:+	RI	nan	1	Kynurenine--oxoglutarate transaminase 1	9.71819	2.64e-24	Ppup096400
Ppup096410;A3:Scaffold_103:220006-222531:220006-222554:+	A3	nan	1	Kynurenine--oxoglutarate transaminase 3	8.59618	4.3e-15	Ppup096410
Ppup096410;A5:Scaffold_103:220020-222531:220006-222531:+	A5	nan	1	Kynurenine--oxoglutarate transaminase 3	8.59618	4.3e-15	Ppup096410
Ppup154760;RI:Scaffold_575:350548:351034-352150:352348:-	RI	0.0591981	0.0484515	NAD-dependent protein deacetylase Sirt6	3.88558	0	Ppup154760
Ppup096410;RI:Scaffold_103:222711:222790-222879:223035:+	RI	nan	1	Kynurenine--oxoglutarate transaminase 3	8.59618	4.3e-15	Ppup096410
Ppup096410;RI:Scaffold_103:222711:222795-222879:223035:+	RI	0.236846	0.0999001	Kynurenine--oxoglutarate transaminase 3	8.59618	4.3e-15	Ppup096410
Ppup061580;RI:Scaffold_126:22771:22860-22981:23587:+	RI	-0.0795317	0.038628	Endoplasmin	2.93948	4.22e-10	Ppup061580
Ppup061580;RI:Scaffold_126:23687:23775-23814:25810:+	RI	-0.088758	0.024975	Endoplasmin	2.93948	4.22e-10	Ppup061580
Ppup081600;A5:Scaffold_17:76209-76537:76205-76537:+	A5	-0.100413	0.023976	Serine protease 55	11.9115	2.54e-34	Ppup081600
novelGenePB.6914;SE:Scaffold_111:808391-809547:809561-809653:-	SE	-0.103255	0.0374625		11.8067	2.06e-100	novelGenePB.6914
Ppup140770;SE:Scaffold_0:3412296-3416586:3416727-3417683:+	SE	-0.106694	0.0471861	Serpin B8	2.26518	8.12e-56	Ppup140770
Ppup105870_Ppup105880;A5:Scaffold_10:3539069-3539136:3539053-3539136:+	A5	nan	1		9.75567	1.47e-104	Ppup105870_Ppup105880
Ppup105870_Ppup105880;RI:Scaffold_10:3528220:3528880-3528958:3529096:+	RI	nan	1		9.75567	1.47e-104	Ppup105870_Ppup105880
Ppup105870_Ppup105880;RI:Scaffold_10:3529386:3530036-3530111:3530429:+	RI	nan	1		9.75567	1.47e-104	Ppup105870_Ppup105880
Ppup105870_Ppup105880;RI:Scaffold_10:3531094:3531233-3531313:3531532:+	RI	0.0264279	1		9.75567	1.47e-104	Ppup105870_Ppup105880
Ppup105870_Ppup105880;RI:Scaffold_10:3531313:3531532-3531601:3531932:+	RI	0.000707383	1		9.75567	1.47e-104	Ppup105870_Ppup105880
Ppup105870_Ppup105880;RI:Scaffold_10:3538166:3538291-3538392:3538797:+	RI	-0.274158	0.0569431		9.75567	1.47e-104	Ppup105870_Ppup105880
Ppup105870_Ppup105880;RI:Scaffold_10:3538166:3538296-3538392:3538797:+	RI	nan	1		9.75567	1.47e-104	Ppup105870_Ppup105880
Ppup105870_Ppup105880;RI:Scaffold_10:3538875:3539053-3539136:3539686:+	RI	0.0248593	1		9.75567	1.47e-104	Ppup105870_Ppup105880
Ppup105870_Ppup105880;RI:Scaffold_10:3538875:3539069-3539136:3539686:+	RI	-0.265693	0.0569431		9.75567	1.47e-104	Ppup105870_Ppup105880
Ppup006550;RI:Scaffold_4:1507401:1507540-1507643:1507827:+	RI	-0.152367	0.00749251	Multiple coagulation factor deficiency protein 2 homolog	3.55808	2.31e-118	Ppup006550
Ppup061580;RI:Scaffold_126:22339:22637-22771:22860:+	RI	-0.154183	0.017982	Endoplasmin	2.93948	4.22e-10	Ppup061580
Ppup133780;AF:Scaffold_19:1862277-1862415:1862465:1862277-1867520:1867828:-	AF	-0.154938	0.0034965	Very long-chain-fatty-acid--CoA ligase bubblegum	2.07925	1.5e-158	Ppup133780
Ppup006060;SE:Scaffold_4:1066341-1067257:1067316-1070333:+	SE	-0.173153	0.027972	Tumor protein D54	2.20604	4.11e-213	Ppup006060
Ppup136900;A3:Scaffold_33:993583-1006948:993317-1006948:-	A3	-0.186519	0.025308	Venom acid phosphatase Acph-1	11.1676	5.67e-120	Ppup136900
Ppup142250;RI:Scaffold_0:5420691:5420830-5421275:5421659:+	RI	-0.187084	0.00799201	Transmembrane emp24 domain-containing protein eca	2.16567	3.65e-72	Ppup142250
Ppup140770;AL:Scaffold_0:3412296-3419324:3419734:3412296-3426218:3426535:+	AL	-0.190885	0.0347525	Serpin B8	2.26518	8.12e-56	Ppup140770
Ppup002810;A3:Scaffold_26:1634083-1634161:1634071-1634161:-	A3	-0.190976	0.00599401	Alpha-amylase 2	8.99251	0	Ppup002810
Ppup081600;RI:Scaffold_17:82994:83230-83565:83710:+	RI	-0.19739	0.00799201	Serine protease 55	11.9115	2.54e-34	Ppup081600
Ppup140770;AL:Scaffold_0:3412296-3421381:3421655:3412296-3426218:3426665:+	AL	-0.20013	0.0390364	Serpin B8	2.26518	8.12e-56	Ppup140770
Ppup113610;A5:Scaffold_2:5858444-5858576:5858350-5858576:+	A5	nan	1	Putative phospholipase B-like lamina ancestor	2.34234	1.65e-115	Ppup113610
Ppup113610;A5:Scaffold_2:5858502-5858576:5858350-5858576:+	A5	0	1	Putative phospholipase B-like lamina ancestor	2.34234	1.65e-115	Ppup113610
Ppup113610;A5:Scaffold_2:5858502-5858576:5858444-5858576:+	A5	0.0417914	1	Putative phospholipase B-like lamina ancestor	2.34234	1.65e-115	Ppup113610
Ppup113610;A5:Scaffold_2:5862730-5862820:5862559-5862820:+	A5	nan	1	Putative phospholipase B-like lamina ancestor	2.34234	1.65e-115	Ppup113610
Ppup113610;AF:Scaffold_2:5844481:5845063-5858576:5850769:5851077-5858576:+	AF	-0.00743708	1	Putative phospholipase B-like lamina ancestor	2.34234	1.65e-115	Ppup113610
Ppup113610;AF:Scaffold_2:5844481:5845063-5858576:5856585:5856924-5858576:+	AF	0.506794	0.214286	Putative phospholipase B-like lamina ancestor	2.34234	1.65e-115	Ppup113610
Ppup113610;AF:Scaffold_2:5844481:5845063-5858576:5858256:5858350-5858576:+	AF	0	1	Putative phospholipase B-like lamina ancestor	2.34234	1.65e-115	Ppup113610
Ppup113610;AF:Scaffold_2:5844481:5845063-5858576:5858256:5858444-5858576:+	AF	0.393348	0.214286	Putative phospholipase B-like lamina ancestor	2.34234	1.65e-115	Ppup113610
Ppup113610;AF:Scaffold_2:5844481:5845063-5858576:5858256:5858502-5858576:+	AF	0.330918	0.214286	Putative phospholipase B-like lamina ancestor	2.34234	1.65e-115	Ppup113610
Ppup113610;AF:Scaffold_2:5850769:5851077-5858576:5856585:5856924-5858576:+	AF	0.0181073	1	Putative phospholipase B-like lamina ancestor	2.34234	1.65e-115	Ppup113610
Ppup113610;AF:Scaffold_2:5850769:5851077-5858576:5858256:5858350-5858576:+	AF	0	1	Putative phospholipase B-like lamina ancestor	2.34234	1.65e-115	Ppup113610
Ppup113610;AF:Scaffold_2:5850769:5851077-5858576:5858256:5858444-5858576:+	AF	0.017278	1	Putative phospholipase B-like lamina ancestor	2.34234	1.65e-115	Ppup113610
Ppup113610;AF:Scaffold_2:5850769:5851077-5858576:5858256:5858502-5858576:+	AF	0.0320894	1	Putative phospholipase B-like lamina ancestor	2.34234	1.65e-115	Ppup113610
Ppup113610;AF:Scaffold_2:5856585:5856924-5858576:5858256:5858350-5858576:+	AF	nan	1	Putative phospholipase B-like lamina ancestor	2.34234	1.65e-115	Ppup113610
Ppup113610;AF:Scaffold_2:5856585:5856924-5858576:5858256:5858444-5858576:+	AF	nan	1	Putative phospholipase B-like lamina ancestor	2.34234	1.65e-115	Ppup113610
Ppup113610;AF:Scaffold_2:5856585:5856924-5858576:5858256:5858502-5858576:+	AF	-0.292947	0.253497	Putative phospholipase B-like lamina ancestor	2.34234	1.65e-115	Ppup113610
Ppup113610;RI:Scaffold_2:5862384:5862559-5862711:5862730:+	RI	nan	1	Putative phospholipase B-like lamina ancestor	2.34234	1.65e-115	Ppup113610
Ppup113610;RI:Scaffold_2:5864653:5864834-5864898:5866088:+	RI	-0.000616691	1	Putative phospholipase B-like lamina ancestor	2.34234	1.65e-115	Ppup113610
Ppup113610;SE:Scaffold_2:5862559-5862711:5862730-5862820:+	SE	nan	1	Putative phospholipase B-like lamina ancestor	2.34234	1.65e-115	Ppup113610
Ppup140770;AL:Scaffold_0:3412296-3417683:3418002:3412296-3425377:3425882:+	AL	-0.205055	0.00907426	Serpin B8	2.26518	8.12e-56	Ppup140770
Ppup021370;AF:Scaffold_35:1882242:1882365-1883230:1882574:1882634-1883230:+	AF	-0.231234	0.00699301	Ester hydrolase C11orf54 homolog	4.99823	1.25e-195	Ppup021370
Ppup133260;AF:Scaffold_19:1307842:1308061-1311030:1310077:1310192-1311030:+	AF	-0.231339	0.00333	Vacuole membrane protein 1	4.17939	2.06e-165	Ppup133260
Ppup021370;RI:Scaffold_35:1882574:1882634-1883230:1883364:+	RI	-0.245221	0.00699301	Ester hydrolase C11orf54 homolog	4.99823	1.25e-195	Ppup021370
Ppup117110;A3:Scaffold_50:904402-904570:904316-904570:-	A3	-0.00648441	1	Lipase 1	11.8283	2.32e-36	Ppup117110
Ppup117110;A3:Scaffold_50:904987-905121:904971-905121:-	A3	-0.00723879	1	Lipase 1	11.8283	2.32e-36	Ppup117110
Ppup117110;A5:Scaffold_50:903808-903909:903808-903962:-	A5	-0.000207922	1	Lipase 1	11.8283	2.32e-36	Ppup117110
Ppup117110;RI:Scaffold_50:903479:903582-903724:903808:-	RI	nan	1	Lipase 1	11.8283	2.32e-36	Ppup117110
Ppup117110;RI:Scaffold_50:903479:903582-903724:904070:-	RI	nan	1	Lipase 1	11.8283	2.32e-36	Ppup117110
Ppup117110;RI:Scaffold_50:903479:903594-903724:903808:-	RI	nan	1	Lipase 1	11.8283	2.32e-36	Ppup117110
Ppup117110;RI:Scaffold_50:903479:903594-903724:904070:-	RI	nan	1	Lipase 1	11.8283	2.32e-36	Ppup117110
Ppup117110;RI:Scaffold_50:903479:903808-903909:904070:-	RI	nan	1	Lipase 1	11.8283	2.32e-36	Ppup117110
Ppup117110;RI:Scaffold_50:903479:904070-904159:904684:-	RI	nan	1	Lipase 1	11.8283	2.32e-36	Ppup117110
Ppup117110;RI:Scaffold_50:903724:903808-903909:904070:-	RI	0.00104455	1	Lipase 1	11.8283	2.32e-36	Ppup117110
Ppup117110;RI:Scaffold_50:903724:903808-903962:904070:-	RI	nan	1	Lipase 1	11.8283	2.32e-36	Ppup117110
Ppup117110;RI:Scaffold_50:904159:904316-904570:904684:-	RI	nan	1	Lipase 1	11.8283	2.32e-36	Ppup117110
Ppup117110;RI:Scaffold_50:904159:904402-904570:904684:-	RI	-0.0272298	1	Lipase 1	11.8283	2.32e-36	Ppup117110
Ppup117110;RI:Scaffold_50:904780:904971-905121:905201:-	RI	nan	1	Lipase 1	11.8283	2.32e-36	Ppup117110
Ppup117110;RI:Scaffold_50:904780:904987-905121:905201:-	RI	-0.00278022	1	Lipase 1	11.8283	2.32e-36	Ppup117110
Ppup140770;AL:Scaffold_0:3412296-3416917:3418551:3412296-3425377:3425882:+	AL	-0.251688	0.0474203	Serpin B8	2.26518	8.12e-56	Ppup140770
Ppup083190;RI:Scaffold_17:1528200:1528565-1528616:1528783:+	RI	-0.254711	0.016983	Kynurenine--oxoglutarate transaminase 1	10.6462	1.2e-40	Ppup083190
Ppup003240;AF:Scaffold_26:2079177:2079362-2080014:2079580:2079775-2080014:+	AF	-0.255082	0.03996	Natterin-3	4.57869	1.22e-88	Ppup003240
Ppup153690;AF:Scaffold_292:564083:564225-585098:583408:583691-585098:+	AF	-0.270925	0.001998	Sodium-coupled monocarboxylate transporter 2	5.60088	0	Ppup153690
Ppup071220;SE:Scaffold_30:1614937-1615025:1615187-1615276:-	SE	-0.272392	0.020979	Putative uncharacterized protein	10.9993	0	Ppup071220
Ppup140770;AL:Scaffold_0:3412296-3418230:3418551:3412296-3423895:3424249:+	AL	-0.272568	0.0466676	Serpin B8	2.26518	8.12e-56	Ppup140770
Ppup010390;RI:Scaffold_4:6461309:6461712-6461791:6462793:+	RI	-0.274257	0.000999001	Leukocyte elastase inhibitor	4.33572	1.8e-189	Ppup010390
Ppup136900;A3:Scaffold_33:993508-1006948:993317-1006948:-	A3	-0.29208	0.00799201	Venom acid phosphatase Acph-1	11.1676	5.67e-120	Ppup136900
Ppup163540;RI:Scaffold_180:316145:316176-316259:316780:+	RI	-0.307253	0	Putative uncharacterized protein	11.2198	7.94e-23	Ppup163540
Ppup008700;SE:Scaffold_4:4025198-4029417:4029478-4029684:+	SE	-0.312814	0.001998	Protein lifeguard 1	3.08229	9e-186	Ppup008700
Ppup140770;A3:Scaffold_0:3412296-3423553:3412296-3423895:+	A3	-0.315764	0.044363	Serpin B8	2.26518	8.12e-56	Ppup140770
Ppup140770;AL:Scaffold_0:3412296-3416586:3418205:3412296-3425377:3425882:+	AL	-0.318878	0.0278559	Serpin B8	2.26518	8.12e-56	Ppup140770
Ppup133780;AF:Scaffold_19:1862277-1862415:1862465:1862277-1866244:1866383:-	AF	-0.321019	0.00174825	Very long-chain-fatty-acid--CoA ligase bubblegum	2.07925	1.5e-158	Ppup133780
Ppup173830_Ppup173840;MX:Scaffold_7:3155176-3156989:3157124-3160853:3155176-3158964:3159099-3160853:+	MX	-0.321407	0.00899101		2.22196	3.16e-295	Ppup173830_Ppup173840
Ppup163540;RI:Scaffold_180:317268:317470-317588:317793:+	RI	-0.325414	0	Putative uncharacterized protein	11.2198	7.94e-23	Ppup163540
Ppup140770;AL:Scaffold_0:3412296-3416586:3418002:3412296-3425377:3425882:+	AL	-0.329567	0.0384322	Serpin B8	2.26518	8.12e-56	Ppup140770
Ppup140770;AL:Scaffold_0:3412296-3417683:3418002:3412296-3425377:3425626:+	AL	-0.333973	0	Serpin B8	2.26518	8.12e-56	Ppup140770
Ppup140770;AL:Scaffold_0:3412296-3414421:3415671:3412296-3423895:3424249:+	AL	-0.339469	0.0338772	Serpin B8	2.26518	8.12e-56	Ppup140770
Ppup133260;A5:Scaffold_19:1309681-1311030:1309317-1311030:+	A5	0.103307	0.195638	Vacuole membrane protein 1	4.17939	2.06e-165	Ppup133260
Ppup133260;AF:Scaffold_19:1307842:1308061-1311030:1310475:1310797-1311030:+	AF	-0.00339034	1	Vacuole membrane protein 1	4.17939	2.06e-165	Ppup133260
Ppup133260;RI:Scaffold_19:1309227:1309317-1309433:1309681:+	RI	0.243276	0.10989	Vacuole membrane protein 1	4.17939	2.06e-165	Ppup133260
Ppup133260;SE:Scaffold_19:1308061-1309227:1309317-1311030:+	SE	-0.027562	1	Vacuole membrane protein 1	4.17939	2.06e-165	Ppup133260
Ppup133260;SE:Scaffold_19:1308061-1309227:1309681-1311030:+	SE	0.00151727	1	Vacuole membrane protein 1	4.17939	2.06e-165	Ppup133260
Ppup133260;SE:Scaffold_19:1309317-1309433:1309681-1311030:+	SE	-0.0756292	0.244755	Vacuole membrane protein 1	4.17939	2.06e-165	Ppup133260
Ppup044750;RI:Scaffold_1:2949490:2949929-2949932:2950008:+	RI	-0.341727	0	Putative uncharacterized protein	11.7217	5.23e-26	Ppup044750
Ppup133780;A3:Scaffold_19:1863357-1864761:1863338-1864761:-	A3	-0.00636588	1	Very long-chain-fatty-acid--CoA ligase bubblegum	2.07925	1.5e-158	Ppup133780
Ppup133780;AF:Scaffold_19:1862277-1862415:1862465:1862277-1867520:1868022:-	AF	-0.0715917	0.0705658	Very long-chain-fatty-acid--CoA ligase bubblegum	2.07925	1.5e-158	Ppup133780
Ppup133780;AF:Scaffold_19:1862277-1862415:1862465:1862277-1867520:1868401:-	AF	0.0438018	1	Very long-chain-fatty-acid--CoA ligase bubblegum	2.07925	1.5e-158	Ppup133780
Ppup133960;AL:Scaffold_19:2073640-2074808:2075337:2073640-2094081:2096451:+	AL	-0.35165	0.0404595	Ankyrin-3	2.17632	1.56e-75	Ppup133960
Ppup133780;AF:Scaffold_19:1862277-1866244:1866383:1862277-1867520:1868022:-	AF	0.155629	0.0868298	Very long-chain-fatty-acid--CoA ligase bubblegum	2.07925	1.5e-158	Ppup133780
Ppup133780;SE:Scaffold_19:1862277-1863055:1863338-1864761:-	SE	nan	1	Very long-chain-fatty-acid--CoA ligase bubblegum	2.07925	1.5e-158	Ppup133780
Ppup133960;A5:Scaffold_19:2060778-2061681:2060754-2061681:+	A5	nan	1	Ankyrin-3	2.17632	1.56e-75	Ppup133960
Ppup133960;A5:Scaffold_19:2060801-2061681:2060754-2061681:+	A5	0.0347636	1	Ankyrin-3	2.17632	1.56e-75	Ppup133960
Ppup133960;A5:Scaffold_19:2060801-2061681:2060778-2061681:+	A5	0.0990027	0.337762	Ankyrin-3	2.17632	1.56e-75	Ppup133960
Ppup133960;A5:Scaffold_19:2072025-2072263:2071771-2072263:+	A5	-0.104943	0.131596	Ankyrin-3	2.17632	1.56e-75	Ppup133960
Ppup133960;AF:Scaffold_19:2057940:2058614-2061681:2060695:2060754-2061681:+	AF	0.00655589	1	Ankyrin-3	2.17632	1.56e-75	Ppup133960
Ppup133960;AF:Scaffold_19:2057940:2058614-2061681:2060695:2060778-2061681:+	AF	-0.223573	0.226274	Ankyrin-3	2.17632	1.56e-75	Ppup133960
Ppup133960;AL:Scaffold_19:2073640-2074808:2075259:2073640-2094081:2096451:+	AL	-0.0306233	1	Ankyrin-3	2.17632	1.56e-75	Ppup133960
Ppup133960;AL:Scaffold_19:2073640-2074808:2075333:2073640-2094081:2096451:+	AL	0	1	Ankyrin-3	2.17632	1.56e-75	Ppup133960
Ppup133960;AL:Scaffold_19:2073640-2074808:2075739:2073640-2094081:2096451:+	AL	0	1	Ankyrin-3	2.17632	1.56e-75	Ppup133960
Ppup133960;AL:Scaffold_19:2073640-2074808:2076445:2073640-2094081:2096451:+	AL	0.195523	0.111189	Ankyrin-3	2.17632	1.56e-75	Ppup133960
Ppup133960;AL:Scaffold_19:2073640-2074808:2076652:2073640-2094081:2096451:+	AL	-0.122472	0.111189	Ankyrin-3	2.17632	1.56e-75	Ppup133960
Ppup133960;RI:Scaffold_19:2071701:2071771-2072263:2072504:+	RI	-0.292677	0.111189	Ankyrin-3	2.17632	1.56e-75	Ppup133960
Ppup133960;RI:Scaffold_19:2071701:2072025-2072263:2072504:+	RI	0.0712863	0.195266	Ankyrin-3	2.17632	1.56e-75	Ppup133960
Ppup133960;SE:Scaffold_19:2062085-2065258:2065275-2067722:+	SE	-0.0719822	0.131993	Ankyrin-3	2.17632	1.56e-75	Ppup133960
Ppup133960;SE:Scaffold_19:2072899-2073410:2073640-2074808:+	SE	0.0292042	1	Ankyrin-3	2.17632	1.56e-75	Ppup133960
Ppup140770;AL:Scaffold_0:3412296-3420857:3421181:3412296-3423895:3424249:+	AL	-0.360018	0.0223366	Serpin B8	2.26518	8.12e-56	Ppup140770
Ppup140770;AL:Scaffold_0:3412296-3419324:3421181:3412296-3425377:3425882:+	AL	-0.360601	0.0265588	Serpin B8	2.26518	8.12e-56	Ppup140770
Ppup140770;AL:Scaffold_0:3412296-3414421:3415671:3412296-3426218:3426665:+	AL	-0.372446	0.0471861	Serpin B8	2.26518	8.12e-56	Ppup140770
Ppup136900;A5:Scaffold_33:993317-1005964:993317-1006138:-	A5	nan	1	Venom acid phosphatase Acph-1	11.1676	5.67e-120	Ppup136900
Ppup136900;A5:Scaffold_33:993317-1005964:993317-1006232:-	A5	nan	1	Venom acid phosphatase Acph-1	11.1676	5.67e-120	Ppup136900
Ppup136900;A5:Scaffold_33:993317-1006138:993317-1006232:-	A5	nan	1	Venom acid phosphatase Acph-1	11.1676	5.67e-120	Ppup136900
Ppup136900;AF:Scaffold_33:993317-994921:994953:993317-1006948:1007228:-	AF	0.0643811	0.227772	Venom acid phosphatase Acph-1	11.1676	5.67e-120	Ppup136900
Ppup136900;RI:Scaffold_33:992678:992943-993005:993115:-	RI	0.00584338	1	Venom acid phosphatase Acph-1	11.1676	5.67e-120	Ppup136900
Ppup136900;SE:Scaffold_33:993317-1005964:1006271-1006948:-	SE	-0.0296276	1	Venom acid phosphatase Acph-1	11.1676	5.67e-120	Ppup136900
Ppup136900;SE:Scaffold_33:993317-1006138:1006271-1006948:-	SE	0.0134747	1	Venom acid phosphatase Acph-1	11.1676	5.67e-120	Ppup136900
Ppup136900;SE:Scaffold_33:993317-1006232:1006271-1006948:-	SE	0.0248988	1	Venom acid phosphatase Acph-1	11.1676	5.67e-120	Ppup136900
Ppup140770;AL:Scaffold_0:3412296-3419324:3419734:3412296-3423895:3424249:+	AL	-0.393765	0.0171933	Serpin B8	2.26518	8.12e-56	Ppup140770
Ppup139080;RI:Scaffold_0:792410:792435-792595:792688:+	RI	-0.00786028	1	ATP-dependent RNA helicase p62	2.47771	2.66e-65	Ppup139080
Ppup139080;SE:Scaffold_0:792688-793359:793433-793720:+	SE	0.000836209	1	ATP-dependent RNA helicase p62	2.47771	2.66e-65	Ppup139080
Ppup140770;AL:Scaffold_0:3412296-3421381:3421655:3412296-3426218:3426535:+	AL	-0.407645	0.00640536	Serpin B8	2.26518	8.12e-56	Ppup140770
Ppup140770;A3:Scaffold_0:3412296-3416586:3412296-3416917:+	A3	0.114627	0.202342	Serpin B8	2.26518	8.12e-56	Ppup140770
Ppup140770;A3:Scaffold_0:3412296-3416586:3412296-3417683:+	A3	-0.0233472	1	Serpin B8	2.26518	8.12e-56	Ppup140770
Ppup140770;A3:Scaffold_0:3412296-3416917:3412296-3417683:+	A3	-0.0173519	1	Serpin B8	2.26518	8.12e-56	Ppup140770
Ppup140770;A3:Scaffold_0:3412296-3416917:3412296-3418230:+	A3	-0.0541336	0.327424	Serpin B8	2.26518	8.12e-56	Ppup140770
Ppup140770;A3:Scaffold_0:3412296-3417683:3412296-3418230:+	A3	0.0404916	1	Serpin B8	2.26518	8.12e-56	Ppup140770
Ppup140770;A3:Scaffold_0:3412296-3419324:3412296-3420857:+	A3	0.164153	0.118499	Serpin B8	2.26518	8.12e-56	Ppup140770
Ppup140770;A3:Scaffold_0:3412296-3423895:3412296-3424700:+	A3	-0.00883532	1	Serpin B8	2.26518	8.12e-56	Ppup140770
Ppup140770;A3:Scaffold_0:3416727-3416917:3416727-3417683:+	A3	-0.0683825	0.327424	Serpin B8	2.26518	8.12e-56	Ppup140770
Ppup140770;AL:Scaffold_0:3412296-3414421:3414670:3412296-3416586:3418002:+	AL	0.128761	0.107745	Serpin B8	2.26518	8.12e-56	Ppup140770
Ppup140770;AL:Scaffold_0:3412296-3414421:3414670:3412296-3416586:3418205:+	AL	0.00018388	1	Serpin B8	2.26518	8.12e-56	Ppup140770
Ppup140770;AL:Scaffold_0:3412296-3414421:3414670:3412296-3416917:3418002:+	AL	0.0203915	1	Serpin B8	2.26518	8.12e-56	Ppup140770
Ppup140770;AL:Scaffold_0:3412296-3414421:3414670:3412296-3416917:3418551:+	AL	0.0718575	0.198951	Serpin B8	2.26518	8.12e-56	Ppup140770
Ppup140770;AL:Scaffold_0:3412296-3414421:3414670:3412296-3417683:3418002:+	AL	0.00857877	1	Serpin B8	2.26518	8.12e-56	Ppup140770
Ppup140770;AL:Scaffold_0:3412296-3414421:3414670:3412296-3417683:3418551:+	AL	0.0948359	0.120408	Serpin B8	2.26518	8.12e-56	Ppup140770
Ppup140770;AL:Scaffold_0:3412296-3414421:3414670:3412296-3418230:3418428:+	AL	-0.0363975	1	Serpin B8	2.26518	8.12e-56	Ppup140770
Ppup140770;AL:Scaffold_0:3412296-3414421:3414670:3412296-3419324:3420013:+	AL	0	1	Serpin B8	2.26518	8.12e-56	Ppup140770
Ppup140770;AL:Scaffold_0:3412296-3414421:3414670:3412296-3419324:3421181:+	AL	0.0405351	1	Serpin B8	2.26518	8.12e-56	Ppup140770
Ppup140770;AL:Scaffold_0:3412296-3414421:3414670:3412296-3423553:3424249:+	AL	0.172319	0.0585087	Serpin B8	2.26518	8.12e-56	Ppup140770
Ppup140770;AL:Scaffold_0:3412296-3414421:3414670:3412296-3423895:3424249:+	AL	-0.0570288	0.198951	Serpin B8	2.26518	8.12e-56	Ppup140770
Ppup140770;AL:Scaffold_0:3412296-3414421:3414670:3412296-3426218:3426535:+	AL	0.101728	0.0806601	Serpin B8	2.26518	8.12e-56	Ppup140770
Ppup140770;AL:Scaffold_0:3412296-3414421:3414670:3412296-3426218:3426665:+	AL	0.0562407	0.236584	Serpin B8	2.26518	8.12e-56	Ppup140770
Ppup140770;AL:Scaffold_0:3412296-3414421:3415171:3412296-3416586:3418002:+	AL	nan	1	Serpin B8	2.26518	8.12e-56	Ppup140770
Ppup140770;AL:Scaffold_0:3412296-3414421:3415171:3412296-3416586:3418205:+	AL	0	1	Serpin B8	2.26518	8.12e-56	Ppup140770
Ppup140770;AL:Scaffold_0:3412296-3414421:3415171:3412296-3416917:3418002:+	AL	nan	1	Serpin B8	2.26518	8.12e-56	Ppup140770
Ppup140770;AL:Scaffold_0:3412296-3414421:3415171:3412296-3416917:3418551:+	AL	nan	1	Serpin B8	2.26518	8.12e-56	Ppup140770
Ppup140770;AL:Scaffold_0:3412296-3414421:3415171:3412296-3417683:3418002:+	AL	0	1	Serpin B8	2.26518	8.12e-56	Ppup140770
Ppup140770;AL:Scaffold_0:3412296-3414421:3415171:3412296-3417683:3418551:+	AL	0	1	Serpin B8	2.26518	8.12e-56	Ppup140770
Ppup140770;AL:Scaffold_0:3412296-3414421:3415171:3412296-3418230:3418428:+	AL	nan	1	Serpin B8	2.26518	8.12e-56	Ppup140770
Ppup140770;AL:Scaffold_0:3412296-3414421:3415171:3412296-3418230:3418551:+	AL	0	1	Serpin B8	2.26518	8.12e-56	Ppup140770
Ppup140770;AL:Scaffold_0:3412296-3414421:3415171:3412296-3419324:3419734:+	AL	0	1	Serpin B8	2.26518	8.12e-56	Ppup140770
Ppup140770;AL:Scaffold_0:3412296-3414421:3415171:3412296-3419324:3420013:+	AL	nan	1	Serpin B8	2.26518	8.12e-56	Ppup140770
Ppup140770;AL:Scaffold_0:3412296-3414421:3415171:3412296-3419324:3421181:+	AL	0	1	Serpin B8	2.26518	8.12e-56	Ppup140770
Ppup140770;AL:Scaffold_0:3412296-3414421:3415171:3412296-3420857:3421181:+	AL	0	1	Serpin B8	2.26518	8.12e-56	Ppup140770
Ppup140770;AL:Scaffold_0:3412296-3414421:3415171:3412296-3421381:3421655:+	AL	0	1	Serpin B8	2.26518	8.12e-56	Ppup140770
Ppup140770;AL:Scaffold_0:3412296-3414421:3415171:3412296-3423553:3424249:+	AL	0	1	Serpin B8	2.26518	8.12e-56	Ppup140770
Ppup140770;AL:Scaffold_0:3412296-3414421:3415171:3412296-3423895:3424249:+	AL	0	1	Serpin B8	2.26518	8.12e-56	Ppup140770
Ppup140770;AL:Scaffold_0:3412296-3414421:3415171:3412296-3425377:3425626:+	AL	nan	1	Serpin B8	2.26518	8.12e-56	Ppup140770
Ppup140770;AL:Scaffold_0:3412296-3414421:3415171:3412296-3425377:3425882:+	AL	0	1	Serpin B8	2.26518	8.12e-56	Ppup140770
Ppup140770;AL:Scaffold_0:3412296-3414421:3415171:3412296-3426218:3426535:+	AL	0	1	Serpin B8	2.26518	8.12e-56	Ppup140770
Ppup140770;AL:Scaffold_0:3412296-3414421:3415171:3412296-3426218:3426665:+	AL	0	1	Serpin B8	2.26518	8.12e-56	Ppup140770
Ppup140770;AL:Scaffold_0:3412296-3414421:3415671:3412296-3416586:3418002:+	AL	nan	1	Serpin B8	2.26518	8.12e-56	Ppup140770
Ppup140770;AL:Scaffold_0:3412296-3414421:3415671:3412296-3416917:3418002:+	AL	nan	1	Serpin B8	2.26518	8.12e-56	Ppup140770
Ppup140770;AL:Scaffold_0:3412296-3414421:3415671:3412296-3416917:3418551:+	AL	nan	1	Serpin B8	2.26518	8.12e-56	Ppup140770
Ppup140770;AL:Scaffold_0:3412296-3414421:3415671:3412296-3417683:3418002:+	AL	-0.0403329	1	Serpin B8	2.26518	8.12e-56	Ppup140770
Ppup140770;AL:Scaffold_0:3412296-3414421:3415671:3412296-3417683:3418551:+	AL	-0.288262	0.0613471	Serpin B8	2.26518	8.12e-56	Ppup140770
Ppup140770;AL:Scaffold_0:3412296-3414421:3415671:3412296-3418230:3418428:+	AL	nan	1	Serpin B8	2.26518	8.12e-56	Ppup140770
Ppup140770;AL:Scaffold_0:3412296-3414421:3415671:3412296-3418230:3418551:+	AL	-0.163786	0.0991031	Serpin B8	2.26518	8.12e-56	Ppup140770
Ppup140770;AL:Scaffold_0:3412296-3414421:3415671:3412296-3419324:3419734:+	AL	-0.116281	0.180641	Serpin B8	2.26518	8.12e-56	Ppup140770
Ppup140770;AL:Scaffold_0:3412296-3414421:3415671:3412296-3419324:3420013:+	AL	nan	1	Serpin B8	2.26518	8.12e-56	Ppup140770
Ppup140770;AL:Scaffold_0:3412296-3414421:3415671:3412296-3419324:3421181:+	AL	-0.477284	0.0527441	Serpin B8	2.26518	8.12e-56	Ppup140770
Ppup140770;AL:Scaffold_0:3412296-3414421:3415671:3412296-3420857:3421181:+	AL	-0.144077	0.143278	Serpin B8	2.26518	8.12e-56	Ppup140770
Ppup140770;AL:Scaffold_0:3412296-3414421:3415671:3412296-3421381:3421655:+	AL	0.0220901	1	Serpin B8	2.26518	8.12e-56	Ppup140770
Ppup140770;AL:Scaffold_0:3412296-3414421:3415671:3412296-3423553:3424249:+	AL	-0.261963	0.11536	Serpin B8	2.26518	8.12e-56	Ppup140770
Ppup060190;A3:Scaffold_6:4662587-4663974:4662587-4664268:+	A3	-0.414527	0.0024975	Modular serine protease	10.9307	7.18e-29	Ppup060190
Ppup140770;AL:Scaffold_0:3412296-3414421:3415671:3412296-3426218:3426535:+	AL	-0.113585	0.107745	Serpin B8	2.26518	8.12e-56	Ppup140770
Ppup140770;AL:Scaffold_0:3412296-3414421:3416321:3412296-3416586:3418002:+	AL	0.103477	0.132298	Serpin B8	2.26518	8.12e-56	Ppup140770
Ppup140770;AL:Scaffold_0:3412296-3414421:3416321:3412296-3416586:3418205:+	AL	0.00383757	1	Serpin B8	2.26518	8.12e-56	Ppup140770
Ppup140770;AL:Scaffold_0:3412296-3414421:3416321:3412296-3416917:3418002:+	AL	0.0238736	1	Serpin B8	2.26518	8.12e-56	Ppup140770
Ppup140770;AL:Scaffold_0:3412296-3414421:3416321:3412296-3416917:3418551:+	AL	0.0596309	0.228829	Serpin B8	2.26518	8.12e-56	Ppup140770
Ppup140770;AL:Scaffold_0:3412296-3414421:3416321:3412296-3417683:3418002:+	AL	0.0117857	1	Serpin B8	2.26518	8.12e-56	Ppup140770
Ppup140770;AL:Scaffold_0:3412296-3414421:3416321:3412296-3417683:3418551:+	AL	0.0962567	0.11536	Serpin B8	2.26518	8.12e-56	Ppup140770
Ppup140770;AL:Scaffold_0:3412296-3414421:3416321:3412296-3418230:3418428:+	AL	-0.0363273	1	Serpin B8	2.26518	8.12e-56	Ppup140770
Ppup140770;AL:Scaffold_0:3412296-3414421:3416321:3412296-3419324:3420013:+	AL	0	1	Serpin B8	2.26518	8.12e-56	Ppup140770
Ppup140770;AL:Scaffold_0:3412296-3414421:3416321:3412296-3419324:3421181:+	AL	0.0323529	1	Serpin B8	2.26518	8.12e-56	Ppup140770
Ppup140770;AL:Scaffold_0:3412296-3421381:3421655:3412296-3423895:3424249:+	AL	-0.420548	0.00640536	Serpin B8	2.26518	8.12e-56	Ppup140770
Ppup140770;AL:Scaffold_0:3412296-3414421:3416321:3412296-3423553:3424249:+	AL	0.150907	0.0680569	Serpin B8	2.26518	8.12e-56	Ppup140770
Ppup140770;AL:Scaffold_0:3412296-3414421:3416321:3412296-3423895:3424249:+	AL	-0.0495051	1	Serpin B8	2.26518	8.12e-56	Ppup140770
Ppup140770;AL:Scaffold_0:3412296-3414421:3416321:3412296-3426218:3426535:+	AL	0.108671	0.0789461	Serpin B8	2.26518	8.12e-56	Ppup140770
Ppup140770;AL:Scaffold_0:3412296-3414421:3416321:3412296-3426218:3426665:+	AL	0.052291	0.222551	Serpin B8	2.26518	8.12e-56	Ppup140770
Ppup140770;AL:Scaffold_0:3412296-3416586:3418002:3412296-3418230:3418428:+	AL	nan	1	Serpin B8	2.26518	8.12e-56	Ppup140770
Ppup140770;AL:Scaffold_0:3412296-3416586:3418002:3412296-3418230:3418551:+	AL	-0.13784	0.134865	Serpin B8	2.26518	8.12e-56	Ppup140770
Ppup140770;AL:Scaffold_0:3412296-3416586:3418002:3412296-3419324:3419734:+	AL	-0.141535	0.143278	Serpin B8	2.26518	8.12e-56	Ppup140770
Ppup140770;AL:Scaffold_0:3412296-3416586:3418002:3412296-3419324:3420013:+	AL	nan	1	Serpin B8	2.26518	8.12e-56	Ppup140770
Ppup140770;AL:Scaffold_0:3412296-3416586:3418002:3412296-3419324:3421181:+	AL	-0.400138	0.0858318	Serpin B8	2.26518	8.12e-56	Ppup140770
Ppup140770;AL:Scaffold_0:3412296-3416586:3418002:3412296-3420857:3421181:+	AL	-0.188991	0.11536	Serpin B8	2.26518	8.12e-56	Ppup140770
Ppup140770;AL:Scaffold_0:3412296-3416586:3418002:3412296-3421381:3421655:+	AL	-0.0290998	1	Serpin B8	2.26518	8.12e-56	Ppup140770
Ppup140770;AL:Scaffold_0:3412296-3416586:3418002:3412296-3423553:3424249:+	AL	-0.325478	0.11536	Serpin B8	2.26518	8.12e-56	Ppup140770
Ppup140770;AL:Scaffold_0:3412296-3416586:3418002:3412296-3423895:3424249:+	AL	-0.24329	0.0591123	Serpin B8	2.26518	8.12e-56	Ppup140770
Ppup096400;A5:Scaffold_103:215857-215942:215746-215942:+	A5	-0.423755	0.044955	Kynurenine--oxoglutarate transaminase 1	9.71819	2.64e-24	Ppup096400
Ppup140770;AL:Scaffold_0:3412296-3416586:3418002:3412296-3426218:3426535:+	AL	-0.0899033	0.145501	Serpin B8	2.26518	8.12e-56	Ppup140770
Ppup140770;AL:Scaffold_0:3412296-3416586:3418002:3412296-3426218:3426665:+	AL	-0.255696	0.0989919	Serpin B8	2.26518	8.12e-56	Ppup140770
Ppup140770;AL:Scaffold_0:3412296-3416586:3418205:3412296-3418230:3418428:+	AL	-0.189061	0.169386	Serpin B8	2.26518	8.12e-56	Ppup140770
Ppup140770;AL:Scaffold_0:3412296-3416586:3418205:3412296-3418230:3418551:+	AL	0.135249	0.128595	Serpin B8	2.26518	8.12e-56	Ppup140770
Ppup140770;AL:Scaffold_0:3412296-3416586:3418205:3412296-3419324:3420013:+	AL	0	1	Serpin B8	2.26518	8.12e-56	Ppup140770
Ppup140770;AL:Scaffold_0:3412296-3416586:3418205:3412296-3419324:3421181:+	AL	0.148034	0.162459	Serpin B8	2.26518	8.12e-56	Ppup140770
Ppup140770;AL:Scaffold_0:3412296-3416586:3418205:3412296-3420857:3421181:+	AL	0.273809	0.0591123	Serpin B8	2.26518	8.12e-56	Ppup140770
Ppup140770;AL:Scaffold_0:3412296-3416586:3418205:3412296-3423895:3424249:+	AL	-0.0309518	1	Serpin B8	2.26518	8.12e-56	Ppup140770
Ppup140770;AL:Scaffold_0:3412296-3416586:3418205:3412296-3426218:3426535:+	AL	0.0380873	1	Serpin B8	2.26518	8.12e-56	Ppup140770
Ppup140770;AL:Scaffold_0:3412296-3416586:3418205:3412296-3426218:3426665:+	AL	0.0408151	1	Serpin B8	2.26518	8.12e-56	Ppup140770
Ppup140770;AL:Scaffold_0:3412296-3416917:3418002:3412296-3418230:3418428:+	AL	nan	1	Serpin B8	2.26518	8.12e-56	Ppup140770
Ppup140770;AL:Scaffold_0:3412296-3416917:3418002:3412296-3418230:3418551:+	AL	0.00595167	1	Serpin B8	2.26518	8.12e-56	Ppup140770
Ppup140770;AL:Scaffold_0:3412296-3416917:3418002:3412296-3419324:3419734:+	AL	0.0290667	1	Serpin B8	2.26518	8.12e-56	Ppup140770
Ppup140770;AL:Scaffold_0:3412296-3416917:3418002:3412296-3419324:3420013:+	AL	nan	1	Serpin B8	2.26518	8.12e-56	Ppup140770
Ppup140770;AL:Scaffold_0:3412296-3416917:3418002:3412296-3419324:3421181:+	AL	-0.0394302	1	Serpin B8	2.26518	8.12e-56	Ppup140770
Ppup140770;AL:Scaffold_0:3412296-3416917:3418002:3412296-3420857:3421181:+	AL	0.0338377	1	Serpin B8	2.26518	8.12e-56	Ppup140770
Ppup140770;AL:Scaffold_0:3412296-3416917:3418002:3412296-3421381:3421655:+	AL	0.0179759	1	Serpin B8	2.26518	8.12e-56	Ppup140770
Ppup140770;AL:Scaffold_0:3412296-3416917:3418002:3412296-3423553:3424249:+	AL	0.0962028	0.327424	Serpin B8	2.26518	8.12e-56	Ppup140770
Ppup140770;AL:Scaffold_0:3412296-3416917:3418002:3412296-3423895:3424249:+	AL	-0.0334063	1	Serpin B8	2.26518	8.12e-56	Ppup140770
Ppup140770;AL:Scaffold_0:3412296-3416917:3418002:3412296-3425377:3425626:+	AL	nan	1	Serpin B8	2.26518	8.12e-56	Ppup140770
Ppup140770;AL:Scaffold_0:3412296-3416917:3418002:3412296-3425377:3425882:+	AL	-0.169075	0.102842	Serpin B8	2.26518	8.12e-56	Ppup140770
Ppup140770;AL:Scaffold_0:3412296-3416917:3418002:3412296-3426218:3426535:+	AL	-0.00602404	1	Serpin B8	2.26518	8.12e-56	Ppup140770
Ppup140770;AL:Scaffold_0:3412296-3416917:3418002:3412296-3426218:3426665:+	AL	-0.120649	0.198951	Serpin B8	2.26518	8.12e-56	Ppup140770
Ppup140770;AL:Scaffold_0:3412296-3416917:3418551:3412296-3419324:3419734:+	AL	-0.0248592	1	Serpin B8	2.26518	8.12e-56	Ppup140770
Ppup140770;AL:Scaffold_0:3412296-3416917:3418551:3412296-3419324:3420013:+	AL	nan	1	Serpin B8	2.26518	8.12e-56	Ppup140770
Ppup140770;AL:Scaffold_0:3412296-3416917:3418551:3412296-3419324:3421181:+	AL	-0.178956	0.162459	Serpin B8	2.26518	8.12e-56	Ppup140770
Ppup140770;AL:Scaffold_0:3412296-3416917:3418551:3412296-3420857:3421181:+	AL	-0.0386308	1	Serpin B8	2.26518	8.12e-56	Ppup140770
Ppup140770;AL:Scaffold_0:3412296-3416917:3418551:3412296-3421381:3421655:+	AL	0.0165255	1	Serpin B8	2.26518	8.12e-56	Ppup140770
Ppup140770;AL:Scaffold_0:3412296-3416917:3418551:3412296-3423553:3424249:+	AL	0.104231	0.281561	Serpin B8	2.26518	8.12e-56	Ppup140770
Ppup140770;AL:Scaffold_0:3412296-3416917:3418551:3412296-3423895:3424249:+	AL	-0.156339	0.130464	Serpin B8	2.26518	8.12e-56	Ppup140770
Ppup140770;AL:Scaffold_0:3412296-3423895:3424249:3412296-3425377:3425882:+	AL	-0.426949	0.00640536	Serpin B8	2.26518	8.12e-56	Ppup140770
Ppup140770;AL:Scaffold_0:3412296-3416917:3418551:3412296-3426218:3426535:+	AL	-0.0482474	1	Serpin B8	2.26518	8.12e-56	Ppup140770
Ppup140770;AL:Scaffold_0:3412296-3416917:3418551:3412296-3426218:3426665:+	AL	-0.107627	0.210576	Serpin B8	2.26518	8.12e-56	Ppup140770
Ppup140770;AL:Scaffold_0:3412296-3417683:3418002:3412296-3418230:3418428:+	AL	-0.00997184	1	Serpin B8	2.26518	8.12e-56	Ppup140770
Ppup140770;AL:Scaffold_0:3412296-3417683:3418002:3412296-3418230:3418551:+	AL	0.0689031	0.0858318	Serpin B8	2.26518	8.12e-56	Ppup140770
Ppup140770;AL:Scaffold_0:3412296-3417683:3418002:3412296-3419324:3420013:+	AL	0	1	Serpin B8	2.26518	8.12e-56	Ppup140770
Ppup140770;AL:Scaffold_0:3412296-3417683:3418002:3412296-3419324:3421181:+	AL	0.00764304	1	Serpin B8	2.26518	8.12e-56	Ppup140770
Ppup140770;AL:Scaffold_0:3412296-3417683:3418002:3412296-3420857:3421181:+	AL	0.0707551	0.0858318	Serpin B8	2.26518	8.12e-56	Ppup140770
Ppup140770;AL:Scaffold_0:3412296-3417683:3418002:3412296-3423553:3424249:+	AL	0.0385546	1	Serpin B8	2.26518	8.12e-56	Ppup140770
Ppup140770;AL:Scaffold_0:3412296-3417683:3418002:3412296-3423895:3424249:+	AL	-0.0242	1	Serpin B8	2.26518	8.12e-56	Ppup140770
Ppup140770;AL:Scaffold_0:3412296-3417683:3418002:3412296-3426218:3426535:+	AL	0.0564857	0.119463	Serpin B8	2.26518	8.12e-56	Ppup140770
Ppup140770;AL:Scaffold_0:3412296-3417683:3418002:3412296-3426218:3426665:+	AL	0.013607	1	Serpin B8	2.26518	8.12e-56	Ppup140770
Ppup140770;AL:Scaffold_0:3412296-3417683:3418551:3412296-3419324:3419734:+	AL	0.207121	0.0560954	Serpin B8	2.26518	8.12e-56	Ppup140770
Ppup140770;AL:Scaffold_0:3412296-3417683:3418551:3412296-3419324:3420013:+	AL	0	1	Serpin B8	2.26518	8.12e-56	Ppup140770
Ppup140770;AL:Scaffold_0:3412296-3417683:3418551:3412296-3419324:3421181:+	AL	-0.00978604	1	Serpin B8	2.26518	8.12e-56	Ppup140770
Ppup140770;AL:Scaffold_0:3412296-3417683:3418551:3412296-3420857:3421181:+	AL	0.193451	0.0730535	Serpin B8	2.26518	8.12e-56	Ppup140770
Ppup140770;AL:Scaffold_0:3412296-3414421:3416321:3412296-3425377:3425882:+	AL	-0.430409	0.00388897	Serpin B8	2.26518	8.12e-56	Ppup140770
Ppup140770;AL:Scaffold_0:3412296-3417683:3418551:3412296-3423553:3424249:+	AL	0.264285	0.0730535	Serpin B8	2.26518	8.12e-56	Ppup140770
Ppup140770;AL:Scaffold_0:3412296-3417683:3418551:3412296-3423895:3424249:+	AL	-0.190373	0.0560954	Serpin B8	2.26518	8.12e-56	Ppup140770
Ppup140770;AL:Scaffold_0:3412296-3417683:3418551:3412296-3426218:3426535:+	AL	-0.0244662	1	Serpin B8	2.26518	8.12e-56	Ppup140770
Ppup140770;AL:Scaffold_0:3412296-3417683:3418551:3412296-3426218:3426665:+	AL	-0.0496912	1	Serpin B8	2.26518	8.12e-56	Ppup140770
Ppup140770;AL:Scaffold_0:3412296-3418230:3418428:3412296-3419324:3419734:+	AL	0.139536	0.146119	Serpin B8	2.26518	8.12e-56	Ppup140770
Ppup140770;AL:Scaffold_0:3412296-3418230:3418428:3412296-3419324:3420013:+	AL	nan	1	Serpin B8	2.26518	8.12e-56	Ppup140770
Ppup140770;AL:Scaffold_0:3412296-3418230:3418428:3412296-3419324:3421181:+	AL	0.23238	0.14791	Serpin B8	2.26518	8.12e-56	Ppup140770
Ppup140770;AL:Scaffold_0:3412296-3418230:3418428:3412296-3420857:3421181:+	AL	0.165841	0.137599	Serpin B8	2.26518	8.12e-56	Ppup140770
Ppup140770;AL:Scaffold_0:3412296-3418230:3418428:3412296-3421381:3421655:+	AL	0.0626367	0.172339	Serpin B8	2.26518	8.12e-56	Ppup140770
Ppup140770;AL:Scaffold_0:3412296-3418230:3418428:3412296-3423553:3424249:+	AL	0.270529	0.140283	Serpin B8	2.26518	8.12e-56	Ppup140770
Ppup140770;AL:Scaffold_0:3412296-3418230:3418428:3412296-3423895:3424249:+	AL	0.0886359	0.210576	Serpin B8	2.26518	8.12e-56	Ppup140770
Ppup140770;AL:Scaffold_0:3412296-3418230:3418428:3412296-3425377:3425626:+	AL	nan	1	Serpin B8	2.26518	8.12e-56	Ppup140770
Ppup140770;AL:Scaffold_0:3412296-3418230:3418428:3412296-3425377:3425882:+	AL	0.0265191	1	Serpin B8	2.26518	8.12e-56	Ppup140770
Ppup140770;AL:Scaffold_0:3412296-3418230:3418428:3412296-3426218:3426535:+	AL	0.0497181	1	Serpin B8	2.26518	8.12e-56	Ppup140770
Ppup140770;AL:Scaffold_0:3412296-3418230:3418428:3412296-3426218:3426665:+	AL	0.154012	0.176097	Serpin B8	2.26518	8.12e-56	Ppup140770
Ppup140770;AL:Scaffold_0:3412296-3418230:3418551:3412296-3419324:3419734:+	AL	0.136431	0.106524	Serpin B8	2.26518	8.12e-56	Ppup140770
Ppup140770;AL:Scaffold_0:3412296-3418230:3418551:3412296-3419324:3420013:+	AL	0	1	Serpin B8	2.26518	8.12e-56	Ppup140770
Ppup140770;AL:Scaffold_0:3412296-3418230:3418551:3412296-3419324:3421181:+	AL	-0.0579861	0.291921	Serpin B8	2.26518	8.12e-56	Ppup140770
Ppup140770;AL:Scaffold_0:3412296-3418230:3418551:3412296-3420857:3421181:+	AL	0.108143	0.143926	Serpin B8	2.26518	8.12e-56	Ppup140770
Ppup140770;AL:Scaffold_0:3412296-3418230:3418551:3412296-3423553:3424249:+	AL	0.154732	0.107745	Serpin B8	2.26518	8.12e-56	Ppup140770
Ppup105870_Ppup105880;A5:Scaffold_10:3538296-3538392:3538291-3538392:+	A5	-0.435348	0.044955		9.75567	1.47e-104	Ppup105870_Ppup105880
Ppup140770;AL:Scaffold_0:3412296-3418230:3418551:3412296-3426218:3426535:+	AL	-0.0951789	0.113381	Serpin B8	2.26518	8.12e-56	Ppup140770
Ppup140770;AL:Scaffold_0:3412296-3418230:3418551:3412296-3426218:3426665:+	AL	-0.110967	0.143278	Serpin B8	2.26518	8.12e-56	Ppup140770
Ppup140770;AL:Scaffold_0:3412296-3419324:3419734:3412296-3420857:3421181:+	AL	-0.0186457	1	Serpin B8	2.26518	8.12e-56	Ppup140770
Ppup140770;AL:Scaffold_0:3412296-3419324:3419734:3412296-3421381:3421655:+	AL	0.126967	0.0730535	Serpin B8	2.26518	8.12e-56	Ppup140770
Ppup140770;AL:Scaffold_0:3412296-3419324:3419734:3412296-3423553:3424249:+	AL	0.105402	0.187628	Serpin B8	2.26518	8.12e-56	Ppup140770
Ppup140770;AL:Scaffold_0:3412296-3419324:3419734:3412296-3426218:3426665:+	AL	-0.226914	0.0730535	Serpin B8	2.26518	8.12e-56	Ppup140770
Ppup140770;AL:Scaffold_0:3412296-3419324:3420013:3412296-3420857:3421181:+	AL	0	1	Serpin B8	2.26518	8.12e-56	Ppup140770
Ppup140770;AL:Scaffold_0:3412296-3419324:3420013:3412296-3421381:3421655:+	AL	0	1	Serpin B8	2.26518	8.12e-56	Ppup140770
Ppup140770;AL:Scaffold_0:3412296-3419324:3420013:3412296-3423553:3424249:+	AL	0	1	Serpin B8	2.26518	8.12e-56	Ppup140770
Ppup140770;AL:Scaffold_0:3412296-3419324:3420013:3412296-3423895:3424249:+	AL	0	1	Serpin B8	2.26518	8.12e-56	Ppup140770
Ppup140770;AL:Scaffold_0:3412296-3419324:3420013:3412296-3425377:3425626:+	AL	nan	1	Serpin B8	2.26518	8.12e-56	Ppup140770
Ppup140770;AL:Scaffold_0:3412296-3419324:3420013:3412296-3425377:3425882:+	AL	0	1	Serpin B8	2.26518	8.12e-56	Ppup140770
Ppup140770;AL:Scaffold_0:3412296-3419324:3420013:3412296-3426218:3426535:+	AL	0	1	Serpin B8	2.26518	8.12e-56	Ppup140770
Ppup140770;AL:Scaffold_0:3412296-3419324:3420013:3412296-3426218:3426665:+	AL	0	1	Serpin B8	2.26518	8.12e-56	Ppup140770
Ppup140770;AL:Scaffold_0:3412296-3419324:3421181:3412296-3421381:3421655:+	AL	0.110425	0.0873661	Serpin B8	2.26518	8.12e-56	Ppup140770
Ppup140770;AL:Scaffold_0:3412296-3419324:3421181:3412296-3423553:3424249:+	AL	0.403703	0.0591123	Serpin B8	2.26518	8.12e-56	Ppup140770
Ppup140770;AL:Scaffold_0:3412296-3419324:3421181:3412296-3423895:3424249:+	AL	-0.106822	0.162901	Serpin B8	2.26518	8.12e-56	Ppup140770
Ppup140770;AL:Scaffold_0:3412296-3419324:3421181:3412296-3426218:3426535:+	AL	-0.00226034	1	Serpin B8	2.26518	8.12e-56	Ppup140770
Ppup140770;AL:Scaffold_0:3412296-3419324:3421181:3412296-3426218:3426665:+	AL	-0.0568776	0.318238	Serpin B8	2.26518	8.12e-56	Ppup140770
Ppup140770;AL:Scaffold_0:3412296-3420857:3421181:3412296-3421381:3421655:+	AL	0.115307	0.0858318	Serpin B8	2.26518	8.12e-56	Ppup140770
Ppup140770;AL:Scaffold_0:3412296-3420857:3421181:3412296-3423553:3424249:+	AL	0.140946	0.14791	Serpin B8	2.26518	8.12e-56	Ppup140770
Ppup140770;AL:Scaffold_0:3412296-3420857:3421181:3412296-3426218:3426535:+	AL	-0.153358	0.0706321	Serpin B8	2.26518	8.12e-56	Ppup140770
Ppup140770;AL:Scaffold_0:3412296-3420857:3421181:3412296-3426218:3426665:+	AL	-0.238319	0.0706321	Serpin B8	2.26518	8.12e-56	Ppup140770
Ppup140770;AL:Scaffold_0:3412296-3421381:3421655:3412296-3423553:3424249:+	AL	-1.48e-05	1	Serpin B8	2.26518	8.12e-56	Ppup140770
Ppup140770;AL:Scaffold_0:3412296-3423553:3424249:3412296-3426218:3426535:+	AL	-0.112045	0.104105	Serpin B8	2.26518	8.12e-56	Ppup140770
Ppup140770;AL:Scaffold_0:3412296-3423553:3424249:3412296-3426218:3426665:+	AL	-0.377262	0.0501245	Serpin B8	2.26518	8.12e-56	Ppup140770
Ppup140770;AL:Scaffold_0:3412296-3414421:3414670:3412296-3425377:3425882:+	AL	-0.446458	0	Serpin B8	2.26518	8.12e-56	Ppup140770
Ppup140770;AL:Scaffold_0:3412296-3423895:3424249:3412296-3426218:3426535:+	AL	0.134785	0.0730535	Serpin B8	2.26518	8.12e-56	Ppup140770
Ppup140770;AL:Scaffold_0:3412296-3423895:3424249:3412296-3426218:3426665:+	AL	0.117873	0.14791	Serpin B8	2.26518	8.12e-56	Ppup140770
Ppup140770;AL:Scaffold_0:3416727-3416917:3418002:3416727-3419324:3419734:+	AL	-0.231554	0.150288	Serpin B8	2.26518	8.12e-56	Ppup140770
Ppup140770;AL:Scaffold_0:3416727-3417683:3418002:3416727-3419324:3419734:+	AL	-0.245255	0.0951233	Serpin B8	2.26518	8.12e-56	Ppup140770
Ppup140770;AL:Scaffold_0:3416727-3417683:3418551:3416727-3419324:3419734:+	AL	-0.271213	0.133089	Serpin B8	2.26518	8.12e-56	Ppup140770
Ppup140770;RI:Scaffold_0:3416586:3416727-3416917:3418002:+	RI	nan	1	Serpin B8	2.26518	8.12e-56	Ppup140770
Ppup140770;RI:Scaffold_0:3416586:3416727-3417683:3418002:+	RI	-0.180912	0.157089	Serpin B8	2.26518	8.12e-56	Ppup140770
Ppup140770;SE:Scaffold_0:3412296-3416586:3416727-3416917:+	SE	-0.328755	0.113381	Serpin B8	2.26518	8.12e-56	Ppup140770
Ppup140770;AL:Scaffold_0:3412296-3416917:3418551:3412296-3425377:3425626:+	AL	-0.452906	0.00640536	Serpin B8	2.26518	8.12e-56	Ppup140770
Ppup140770;SE:Scaffold_0:3412296-3416586:3416727-3419324:+	SE	-0.0349588	1	Serpin B8	2.26518	8.12e-56	Ppup140770
Ppup140770;SE:Scaffold_0:3412296-3423895:3424847-3425377:+	SE	-0.0275493	1	Serpin B8	2.26518	8.12e-56	Ppup140770
Ppup141990;A3:Scaffold_0:5135989-5136317:5135989-5136413:+	A3	-0.00344024	1	Putative uncharacterized protein	4.19247	0	Ppup141990
Ppup141990;AL:Scaffold_0:4974221-5056071:5058199:4974221-5082458:5083674:+	AL	nan	1	Putative uncharacterized protein	4.19247	0	Ppup141990
Ppup141990;RI:Scaffold_0:5003034:5003056-5003345:5003539:+	RI	0.0761797	0.282343	Putative uncharacterized protein	4.19247	0	Ppup141990
Ppup141990;RI:Scaffold_0:5135756:5135989-5136317:5136967:+	RI	nan	1	Putative uncharacterized protein	4.19247	0	Ppup141990
Ppup141990;RI:Scaffold_0:5136317:5136552-5136666:5136967:+	RI	nan	1	Putative uncharacterized protein	4.19247	0	Ppup141990
Ppup141990;SE:Scaffold_0:4974221-5003034:5003539-5056071:+	SE	-0.0516328	0.425175	Putative uncharacterized protein	4.19247	0	Ppup141990
Ppup141990;SE:Scaffold_0:4974221-5003034:5003539-5082458:+	SE	0.00997565	1	Putative uncharacterized protein	4.19247	0	Ppup141990
Ppup141990;SE:Scaffold_0:4974221-5041870:5042099-5082458:+	SE	-0.056076	0.199301	Putative uncharacterized protein	4.19247	0	Ppup141990
Ppup140770;AL:Scaffold_0:3412296-3416586:3418002:3412296-3425377:3425626:+	AL	-0.504371	0.00388897	Serpin B8	2.26518	8.12e-56	Ppup140770
Ppup133780;AF:Scaffold_19:1862277-1862415:1862465:1862277-1864761:1865053:-	AF	-0.513429	0	Very long-chain-fatty-acid--CoA ligase bubblegum	2.07925	1.5e-158	Ppup133780
Ppup140770;AL:Scaffold_0:3412296-3414421:3415671:3412296-3416586:3418205:+	AL	-0.515043	0.036297	Serpin B8	2.26518	8.12e-56	Ppup140770
Ppup083190;A5:Scaffold_17:1525325-1526323:1525203-1526323:+	A5	-0.518841	0	Kynurenine--oxoglutarate transaminase 1	10.6462	1.2e-40	Ppup083190
Ppup133960;AL:Scaffold_19:2073640-2074808:2076525:2073640-2094081:2096451:+	AL	-0.519343	0.0314685	Ankyrin-3	2.17632	1.56e-75	Ppup133960
Ppup140770;SE:Scaffold_0:3412296-3424700:3424847-3425377:+	SE	-0.542373	0	Serpin B8	2.26518	8.12e-56	Ppup140770
Ppup133780;SE:Scaffold_19:1862277-1863055:1863357-1864761:-	SE	-0.543055	0.00699301	Very long-chain-fatty-acid--CoA ligase bubblegum	2.07925	1.5e-158	Ppup133780
Ppup140770;AL:Scaffold_0:3412296-3417683:3418551:3412296-3425377:3425882:+	AL	-0.543614	0.00388897	Serpin B8	2.26518	8.12e-56	Ppup140770
Ppup140770;AL:Scaffold_0:3412296-3423553:3424249:3412296-3425377:3425882:+	AL	-0.551554	0	Serpin B8	2.26518	8.12e-56	Ppup140770
Ppup140770;AL:Scaffold_0:3412296-3419324:3421181:3412296-3425377:3425626:+	AL	-0.555731	0.00388897	Serpin B8	2.26518	8.12e-56	Ppup140770
Ppup140770;AL:Scaffold_0:3412296-3414421:3415671:3412296-3425377:3425882:+	AL	-0.562266	0.00388897	Serpin B8	2.26518	8.12e-56	Ppup140770
Ppup140770;AL:Scaffold_0:3412296-3416586:3418205:3412296-3425377:3425626:+	AL	-0.590418	0.00640536	Serpin B8	2.26518	8.12e-56	Ppup140770
Ppup140770;AL:Scaffold_0:3412296-3414421:3416321:3412296-3425377:3425626:+	AL	-0.605163	0	Serpin B8	2.26518	8.12e-56	Ppup140770
Ppup153690;A5:Scaffold_292:585971-587724:585485-587724:+	A5	-0.0384238	1	Sodium-coupled monocarboxylate transporter 2	5.60088	0	Ppup153690
Ppup153690;AF:Scaffold_292:564083:564225-585098:569371:569655-585098:+	AF	-0.222309	0.0892441	Sodium-coupled monocarboxylate transporter 2	5.60088	0	Ppup153690
Ppup153690;AF:Scaffold_292:569371:569655-585098:583408:583691-585098:+	AF	-0.0696256	0.0892441	Sodium-coupled monocarboxylate transporter 2	5.60088	0	Ppup153690
Ppup140770;AL:Scaffold_0:3412296-3414421:3414670:3412296-3425377:3425626:+	AL	-0.616847	0	Serpin B8	2.26518	8.12e-56	Ppup140770
Ppup140770;AL:Scaffold_0:3412296-3423895:3424249:3412296-3425377:3425626:+	AL	-0.618478	0.00388897	Serpin B8	2.26518	8.12e-56	Ppup140770
Ppup096410;RI:Scaffold_103:219916:220020-222531:222634:+	RI	-0.628856	0.0162338	Kynurenine--oxoglutarate transaminase 3	8.59618	4.3e-15	Ppup096410
Ppup140770;AL:Scaffold_0:3412296-3418230:3418551:3412296-3425377:3425882:+	AL	-0.630105	0	Serpin B8	2.26518	8.12e-56	Ppup140770
Ppup160680;AF:Scaffold_165:741180:741412-750951:748647:749107-750951:+	AF	nan	1	Glutathione hydrolase 1 proenzyme	6.71593	0	Ppup160680
Ppup160680;AF:Scaffold_165:741180:741412-750951:749648:749824-750951:+	AF	nan	1	Glutathione hydrolase 1 proenzyme	6.71593	0	Ppup160680
Ppup160680;AF:Scaffold_165:748647:749107-750951:749648:749824-750951:+	AF	-0.465272	0.106394	Glutathione hydrolase 1 proenzyme	6.71593	0	Ppup160680
Ppup160680;AF:Scaffold_165:749648:749824-750951:750811:750890-750951:+	AF	nan	1	Glutathione hydrolase 1 proenzyme	6.71593	0	Ppup160680
Ppup161120;RI:Scaffold_165:1622823:1623998-1624073:1624586:-	RI	nan	1	Putative uncharacterized protein	11.4403	0	Ppup161120
Ppup161120;RI:Scaffold_165:1622823:1624586-1624689:1625198:-	RI	nan	1	Putative uncharacterized protein	11.4403	0	Ppup161120
Ppup161120;RI:Scaffold_165:1624689:1625198-1626602:1626861:-	RI	nan	1	Putative uncharacterized protein	11.4403	0	Ppup161120
Ppup140770;AL:Scaffold_0:3412296-3420857:3421181:3412296-3425377:3425882:+	AL	-0.666673	0.00640536	Serpin B8	2.26518	8.12e-56	Ppup140770
Ppup096410;RI:Scaffold_103:219916:220006-222554:222634:+	RI	-0.670525	0.0162338	Kynurenine--oxoglutarate transaminase 3	8.59618	4.3e-15	Ppup096410
Ppup092220;RI:Scaffold_8:1911658:1912671-1913193:1913448:-	RI	-0.673404	0.00499501	Putative uncharacterized protein	3.86882	2.36e-57	Ppup092220
Ppup096410;RI:Scaffold_103:219916:220006-222531:222634:+	RI	-0.674963	0.00124875	Kynurenine--oxoglutarate transaminase 3	8.59618	4.3e-15	Ppup096410
Ppup096410;A5:Scaffold_103:222795-222879:222790-222879:+	A5	-0.675202	0	Kynurenine--oxoglutarate transaminase 3	8.59618	4.3e-15	Ppup096410
Ppup163540;A3:Scaffold_180:317200-317268:317200-317284:+	A3	-0.000456359	1	Putative uncharacterized protein	11.2198	7.94e-23	Ppup163540
Ppup163540;A3:Scaffold_180:317200-317268:317200-317295:+	A3	-0.00130473	1	Putative uncharacterized protein	11.2198	7.94e-23	Ppup163540
Ppup163540;A3:Scaffold_180:317200-317284:317200-317295:+	A3	nan	1	Putative uncharacterized protein	11.2198	7.94e-23	Ppup163540
Ppup163540;A5:Scaffold_180:317498-317588:317470-317588:+	A5	nan	1	Putative uncharacterized protein	11.2198	7.94e-23	Ppup163540
Ppup163540;A5:Scaffold_180:318231-318312:318138-318312:+	A5	-0.000250912	1	Putative uncharacterized protein	11.2198	7.94e-23	Ppup163540
Ppup163540;RI:Scaffold_180:316145:316176-316259:316987:+	RI	nan	1	Putative uncharacterized protein	11.2198	7.94e-23	Ppup163540
Ppup163540;RI:Scaffold_180:316145:316176-316259:317793:+	RI	nan	1	Putative uncharacterized protein	11.2198	7.94e-23	Ppup163540
Ppup163540;RI:Scaffold_180:316145:316176-316259:318831:+	RI	nan	1	Putative uncharacterized protein	11.2198	7.94e-23	Ppup163540
Ppup163540;RI:Scaffold_180:316145:316780-316852:316987:+	RI	nan	1	Putative uncharacterized protein	11.2198	7.94e-23	Ppup163540
Ppup163540;RI:Scaffold_180:316145:316987-317063:317793:+	RI	nan	1	Putative uncharacterized protein	11.2198	7.94e-23	Ppup163540
Ppup163540;RI:Scaffold_180:316145:316987-317063:318831:+	RI	nan	1	Putative uncharacterized protein	11.2198	7.94e-23	Ppup163540
Ppup163540;RI:Scaffold_180:316259:316425-316427:316780:+	RI	nan	1	Putative uncharacterized protein	11.2198	7.94e-23	Ppup163540
Ppup163540;RI:Scaffold_180:316259:316780-316852:316987:+	RI	nan	1	Putative uncharacterized protein	11.2198	7.94e-23	Ppup163540
Ppup163540;RI:Scaffold_180:316259:316780-316852:317793:+	RI	nan	1	Putative uncharacterized protein	11.2198	7.94e-23	Ppup163540
Ppup163540;RI:Scaffold_180:316259:316987-317063:318831:+	RI	nan	1	Putative uncharacterized protein	11.2198	7.94e-23	Ppup163540
Ppup163540;RI:Scaffold_180:316259:317470-317588:317793:+	RI	nan	1	Putative uncharacterized protein	11.2198	7.94e-23	Ppup163540
Ppup163540;RI:Scaffold_180:316852:316987-317063:317200:+	RI	0.00112795	1	Putative uncharacterized protein	11.2198	7.94e-23	Ppup163540
Ppup163540;RI:Scaffold_180:316852:316987-317063:317793:+	RI	nan	1	Putative uncharacterized protein	11.2198	7.94e-23	Ppup163540
Ppup163540;RI:Scaffold_180:316852:317200-317268:317793:+	RI	nan	1	Putative uncharacterized protein	11.2198	7.94e-23	Ppup163540
Ppup163540;RI:Scaffold_180:317063:317200-317268:317793:+	RI	nan	1	Putative uncharacterized protein	11.2198	7.94e-23	Ppup163540
Ppup163540;RI:Scaffold_180:317063:317793-317875:318231:+	RI	nan	1	Putative uncharacterized protein	11.2198	7.94e-23	Ppup163540
Ppup163540;RI:Scaffold_180:317063:318231-318312:318831:+	RI	nan	1	Putative uncharacterized protein	11.2198	7.94e-23	Ppup163540
Ppup161120;A5:Scaffold_165:1626861-1627026:1626861-1627351:-	A5	-0.67695	0.002997	Putative uncharacterized protein	11.4403	0	Ppup161120
Ppup163540;RI:Scaffold_180:317268:317498-317588:317793:+	RI	0.0284503	1	Putative uncharacterized protein	11.2198	7.94e-23	Ppup163540
Ppup163540;RI:Scaffold_180:317588:317793-317875:318231:+	RI	nan	1	Putative uncharacterized protein	11.2198	7.94e-23	Ppup163540
novelGeneAS085;RI:Scaffold_2:1697047:1697220-1697634:1698630:+	RI	-0.682725	0		7.91135	0	novelGeneAS085
Ppup140770;AL:Scaffold_0:3412296-3414421:3415671:3412296-3425377:3425626:+	AL	-0.682836	0	Serpin B8	2.26518	8.12e-56	Ppup140770
Ppup140770;AL:Scaffold_0:3412296-3417683:3418551:3412296-3425377:3425626:+	AL	-0.695363	0	Serpin B8	2.26518	8.12e-56	Ppup140770
Ppup140770;AL:Scaffold_0:3412296-3423553:3424249:3412296-3425377:3425626:+	AL	-0.695974	0.00388897	Serpin B8	2.26518	8.12e-56	Ppup140770
Ppup140770;AL:Scaffold_0:3412296-3419324:3419734:3412296-3425377:3425882:+	AL	-0.696508	0	Serpin B8	2.26518	8.12e-56	Ppup140770
Ppup133960;AF:Scaffold_19:2057940:2058614-2061681:2060695:2060801-2061681:+	AF	-0.69812	0.0314685	Ankyrin-3	2.17632	1.56e-75	Ppup133960
Ppup140770;AL:Scaffold_0:3412296-3421381:3421655:3412296-3425377:3425882:+	AL	-0.703571	0	Serpin B8	2.26518	8.12e-56	Ppup140770
Ppup140770;AL:Scaffold_0:3412296-3418230:3418551:3412296-3425377:3425626:+	AL	-0.752734	0	Serpin B8	2.26518	8.12e-56	Ppup140770
Ppup140770;AL:Scaffold_0:3412296-3420857:3421181:3412296-3425377:3425626:+	AL	-0.760943	0	Serpin B8	2.26518	8.12e-56	Ppup140770
Ppup140770;AL:Scaffold_0:3412296-3421381:3421655:3412296-3425377:3425626:+	AL	-0.813167	0	Serpin B8	2.26518	8.12e-56	Ppup140770
Ppup140770;AL:Scaffold_0:3412296-3419324:3419734:3412296-3425377:3425626:+	AL	-0.815165	0	Serpin B8	2.26518	8.12e-56	Ppup140770
Ppup173830_Ppup173840;AF:Scaffold_7:3131775:3132274-3154198:3152271:3152410-3154198:+	AF	0.000516295	1		2.22196	3.16e-295	Ppup173830_Ppup173840
Ppup173830_Ppup173840;AF:Scaffold_7:3131775:3132274-3154198:3152670:3152793-3154198:+	AF	0.00101636	1		2.22196	3.16e-295	Ppup173830_Ppup173840
Ppup173830_Ppup173840;AF:Scaffold_7:3131795:3132274-3154198:3152271:3152410-3154198:+	AF	-0.0218691	1		2.22196	3.16e-295	Ppup173830_Ppup173840
Ppup173830_Ppup173840;AF:Scaffold_7:3131795:3132274-3154198:3152670:3152793-3154198:+	AF	-0.0259755	1		2.22196	3.16e-295	Ppup173830_Ppup173840
Ppup173830_Ppup173840;AF:Scaffold_7:3152271:3152410-3154198:3152670:3152793-3154198:+	AF	0.00878323	1		2.22196	3.16e-295	Ppup173830_Ppup173840
Ppup133260;RI:Scaffold_19:1310077:1310192-1311030:1311362:+	RI	-0.827873	0.00333	Vacuole membrane protein 1	4.17939	2.06e-165	Ppup133260
novelGeneAS085;RI:Scaffold_2:1696799:1696989-1697047:1697220:+	RI	0.00561867	1		7.91135	0	novelGeneAS085
Ppup160680;RI:Scaffold_165:750811:750890-750951:751184:+	RI	-0.895323	0	Glutathione hydrolase 1 proenzyme	6.71593	0	Ppup160680
Ppup113610;RI:Scaffold_2:5862384:5862559-5862820:5863073:+	RI	-0.918439	0.0224775	Putative phospholipase B-like lamina ancestor	2.34234	1.65e-115	Ppup113610
Ppup113610;RI:Scaffold_2:5862384:5862730-5862820:5863073:+	RI	-0.963182	0.0224775	Putative phospholipase B-like lamina ancestor	2.34234	1.65e-115	Ppup113610
Ppup160680;AF:Scaffold_165:748647:749107-750951:750811:750890-750951:+	AF	-0.999939	0	Glutathione hydrolase 1 proenzyme	6.71593	0	Ppup160680
novelGenePB.3969;A3:Scaffold_17:212408-212473:212369-212473:-	A3	0.0555934	0.198302		11.0936	4.46e-49	novelGenePB.3969
novelGenePB.3969;RI:Scaffold_17:214360:214448-214561:214619:-	RI	-0.0555934	0.198302		11.0936	4.46e-49	novelGenePB.3969
novelGenePB.5711;A3:Scaffold_33:407875-409659:407158-409659:-	A3	-0.0156064	1		2.76998	1.7e-240	novelGenePB.5711
novelGenePB.5711;A3:Scaffold_33:419012-419481:419009-419481:-	A3	-0.00123452	1		2.76998	1.7e-240	novelGenePB.5711
novelGenePB.5711;A5:Scaffold_33:406753-407099:406753-407813:-	A5	-0.00581549	1		2.76998	1.7e-240	novelGenePB.5711
novelGenePB.5711;AF:Scaffold_33:419558-420130:420176:419558-420705:421092:-	AF	-0.392226	0.0584416		2.76998	1.7e-240	novelGenePB.5711
novelGenePB.5711;MX:Scaffold_33:406753-407099:407158-409659:406753-407813:407875-409659:-	MX	0.00473702	1		2.76998	1.7e-240	novelGenePB.5711
novelGenePB.5711;RI:Scaffold_33:407099:407158-407813:407875:-	RI	0.0137047	1		2.76998	1.7e-240	novelGenePB.5711
novelGenePB.5711;SE:Scaffold_33:406753-407099:407158-407813:-	SE	-0.0448511	1		2.76998	1.7e-240	novelGenePB.5711
novelGenePB.5711;SE:Scaffold_33:406753-407099:407158-409659:-	SE	0.121713	0.0815185		2.76998	1.7e-240	novelGenePB.5711
novelGenePB.5711;SE:Scaffold_33:406753-407099:407875-409659:-	SE	0.141999	0.0584416		2.76998	1.7e-240	novelGenePB.5711
novelGenePB.5711;SE:Scaffold_33:407158-407813:407875-409659:-	SE	-0.0139029	1		2.76998	1.7e-240	novelGenePB.5711
novelGenePB.6914;A3:Scaffold_111:809319-809547:808391-809547:-	A3	0.00220217	1		11.8067	2.06e-100	novelGenePB.6914
novelGenePB.6914;A5:Scaffold_111:809319-809520:809319-809547:-	A5	nan	1		11.8067	2.06e-100	novelGenePB.6914
novelGenePB.6914;RI:Scaffold_111:808026:809349-809568:809808:-	RI	nan	1		11.8067	2.06e-100	novelGenePB.6914
novelGenePB.6914;RI:Scaffold_111:809547:809561-809653:809808:-	RI	0.00220217	1		11.8067	2.06e-100	novelGenePB.6914
Ppup160680;AF:Scaffold_165:741180:741412-750951:750811:750890-750951:+	AF	-1	0	Glutathione hydrolase 1 proenzyme	6.71593	0	Ppup160680
