# Supplementary material for: Comprehensive isoform-level analysis reveals the contribution of alternative isoforms to venom evolution and repertoire diversity
Source: HighWire-hosted journal article supplement (doi:10.1101/gr.277707.123), 2023-09-01
Supplement: Supplemental_Tables_S1_to_S19.zip [file Supplemental_Table_S10.xlsx]

## Sheet: Sheet1
Supplemental Table S10. Gene ontology (GO) of the 50 highly reliable venom gland expressed genes (TPM values higher than the N90 value of the venom gland) that are differentially spliced and significantly up-regulated the venom gland
GO	NS	enrichment	name	ratio_in_study	ratio_in_pop	p_uncorrected	depth	study_count	p_fdr_bh	study_items
GO:0097052	BP	e	L-kynurenine metabolic process	2/32	2/10157	9.61664e-06	9	2	0.0469405	Ppup083190.1, Ppup096400.1
GO:0097053	BP	e	L-kynurenine catabolic process	2/32	2/10157	9.61664e-06	10	2	0.0469405	Ppup083190.1, Ppup096400.1
GO:0070189	BP	e	kynurenine metabolic process	3/32	15/10157	1.25981e-05	8	3	0.0469405	Ppup083190.1, Ppup096400.1, Ppup096410.1
GO:0042537	BP	e	benzene-containing compound metabolic process	3/32	17/10157	1.87474e-05	4	3	0.0523897	Ppup083190.1, Ppup096400.1, Ppup096410.1
GO:0009617	BP	e	response to bacterium	5/32	154/10157	0.000108631	5	5	0.242856	Ppup019220.1, Ppup060190.1, Ppup070660.1, Ppup083190.1, Ppup096400.1
GO:0042182	BP	e	ketone catabolic process	2/32	6/10157	0.000143117	4	2	0.266627	Ppup083190.1, Ppup096400.1
GO:0043207	BP	e	response to external biotic stimulus	7/32	395/10157	0.000184686	3	7	0.294917	Ppup019220.1, Ppup060190.1, Ppup070660.1, Ppup083190.1, Ppup096400.1, Ppup139080.1, Ppup160680.1
GO:0009607	BP	e	response to biotic stimulus	7/32	404/10157	0.000212249	2	7	0.296565	Ppup019220.1, Ppup060190.1, Ppup070660.1, Ppup083190.1, Ppup096400.1, Ppup139080.1, Ppup160680.1
GO:0042180	BP	e	cellular ketone metabolic process	3/32	53/10157	0.000597965	3	3	0.742672	Ppup083190.1, Ppup096400.1, Ppup096410.1
GO:0051707	BP	e	response to other organism	6/32	352/10157	0.000700712	4	6	0.783255	Ppup019220.1, Ppup060190.1, Ppup070660.1, Ppup083190.1, Ppup096400.1, Ppup139080.1
GO:1901605	BP	e	alpha-amino acid metabolic process	4/32	135/10157	0.000804134	7	4	0.817146	Ppup083190.1, Ppup096400.1, Ppup096410.1, Ppup160680.1
GO:0006575	BP	e	cellular modified amino acid metabolic process	3/32	69/10157	0.00129246	4	3	1	Ppup083190.1, Ppup096400.1, Ppup160680.1
GO:0019752	BP	e	carboxylic acid metabolic process	6/32	466/10157	0.00295693	5	6	1	Ppup006550.1, Ppup083190.1, Ppup096400.1, Ppup096410.1, Ppup133780.1, Ppup160680.1
GO:0051450	BP	e	myoblast proliferation	1/32	1/10157	0.00315054	3	1	1	Ppup124350.1
GO:0006520	BP	e	cellular amino acid metabolic process	4/32	197/10157	0.0032263	6	4	1	Ppup083190.1, Ppup096400.1, Ppup096410.1, Ppup160680.1
GO:0009605	BP	e	response to external stimulus	7/32	650/10157	0.00350632	2	7	1	Ppup019220.1, Ppup060190.1, Ppup070660.1, Ppup083190.1, Ppup096400.1, Ppup139080.1, Ppup160680.1
GO:0043436	BP	e	oxoacid metabolic process	6/32	501/10157	0.00423251	4	6	1	Ppup006550.1, Ppup083190.1, Ppup096400.1, Ppup096410.1, Ppup133780.1, Ppup160680.1
GO:0044419	BP	e	interspecies interaction between organisms	6/32	507/10157	0.00448697	1	6	1	Ppup019220.1, Ppup060190.1, Ppup070660.1, Ppup083190.1, Ppup096400.1, Ppup139080.1
GO:0006082	BP	e	organic acid metabolic process	6/32	508/10157	0.00453047	3	6	1	Ppup006550.1, Ppup083190.1, Ppup096400.1, Ppup096410.1, Ppup133780.1, Ppup160680.1
GO:0010951	BP	e	negative regulation of endopeptidase activity	2/32	33/10157	0.00477733	10	2	1	Ppup010390.1, Ppup140770.1
GO:0010466	BP	e	negative regulation of peptidase activity	2/32	33/10157	0.00477733	9	2	1	Ppup010390.1, Ppup140770.1
GO:0006090	BP	e	pyruvate metabolic process	2/32	35/10157	0.00536248	7	2	1	Ppup083190.1, Ppup096400.1
GO:0071287	BP	e	cellular response to manganese ion	1/32	2/10157	0.00629146	6	1	1	Ppup061580.1
GO:0015811	BP	e	L-cystine transport	1/32	3/10157	0.00942279	10	1	1	Ppup028060.1
GO:1902236	BP	e	negative regulation of endoplasmic reticulum stress-induced intrinsic apoptotic signaling pathway	1/32	3/10157	0.00942279	10	1	1	Ppup008700.1
GO:1901575	BP	e	organic substance catabolic process	8/32	1013/10157	0.0113806	3	8	1	Ppup043010.1, Ppup061580.1, Ppup070660.1, Ppup083190.1, Ppup096400.1, Ppup113610.1, Ppup117110.1, Ppup160680.1
GO:0044281	BP	e	small molecule metabolic process	8/32	1021/10157	0.0119086	2	8	1	Ppup006550.1, Ppup043010.1, Ppup083190.1, Ppup096400.1, Ppup096410.1, Ppup109070.1, Ppup133780.1, Ppup160680.1
GO:0043029	BP	e	T cell homeostasis	1/32	4/10157	0.0125446	7	1	1	Ppup094310.1
GO:0071248	BP	e	cellular response to metal ion	2/32	55/10157	0.0128701	5	2	1	Ppup061580.1, Ppup133960.1
GO:0006952	BP	e	defense response	4/32	294/10157	0.0130623	3	4	1	Ppup019220.1, Ppup060190.1, Ppup070660.1, Ppup139080.1
GO:0043648	BP	e	dicarboxylic acid metabolic process	2/32	56/10157	0.0133207	6	2	1	Ppup096410.1, Ppup160680.1
GO:1901606	BP	e	alpha-amino acid catabolic process	2/32	56/10157	0.0133207	8	2	1	Ppup083190.1, Ppup096400.1
GO:0031347	BP	e	regulation of defense response	3/32	164/10157	0.014547	5	3	1	Ppup019220.1, Ppup139080.1, Ppup160680.1
GO:0045861	BP	e	negative regulation of proteolysis	2/32	59/10157	0.0147134	8	2	1	Ppup010390.1, Ppup140770.1
GO:0016042	BP	e	lipid catabolic process	3/32	165/10157	0.014785	4	3	1	Ppup070660.1, Ppup113610.1, Ppup117110.1
GO:0010042	BP	e	response to manganese ion	1/32	5/10157	0.0156568	5	1	1	Ppup061580.1
GO:0000101	BP	e	sulfur amino acid transport	1/32	5/10157	0.0156568	9	1	1	Ppup028060.1
GO:0006154	BP	e	adenosine catabolic process	1/32	5/10157	0.0156568	10	1	1	Ppup043010.1
GO:0045938	BP	e	positive regulation of circadian sleep/wake cycle, sleep	1/32	5/10157	0.0156568	6	1	1	Ppup133780.1
GO:0002260	BP	e	lymphocyte homeostasis	1/32	5/10157	0.0156568	6	1	1	Ppup094310.1
GO:0001776	BP	e	leukocyte homeostasis	1/32	5/10157	0.0156568	5	1	1	Ppup094310.1
GO:0009063	BP	e	cellular amino acid catabolic process	2/32	62/10157	0.0161663	7	2	1	Ppup083190.1, Ppup096400.1
GO:0052548	BP	e	regulation of endopeptidase activity	2/32	63/10157	0.0166639	8	2	1	Ppup010390.1, Ppup140770.1
GO:0052547	BP	e	regulation of peptidase activity	2/32	63/10157	0.0166639	7	2	1	Ppup010390.1, Ppup140770.1
GO:0071241	BP	e	cellular response to inorganic substance	2/32	66/10157	0.0181954	4	2	1	Ppup061580.1, Ppup133960.1
GO:0007444	BP	e	imaginal disc development	2/32	67/10157	0.0187187	5	2	1	Ppup063140.1, Ppup113610.1
GO:0070932	BP	e	histone H3 deacetylation	1/32	6/10157	0.0187595	10	1	1	Ppup154760.1
GO:1902235	BP	e	regulation of endoplasmic reticulum stress-induced intrinsic apoptotic signaling pathway	1/32	6/10157	0.0187595	9	1	1	Ppup008700.1
GO:0048701	BP	e	embryonic cranial skeleton morphogenesis	1/32	6/10157	0.0187595	6	1	1	Ppup094310.1
GO:0009056	BP	e	catabolic process	8/32	1126/10157	0.0206722	2	8	1	Ppup043010.1, Ppup061580.1, Ppup070660.1, Ppup083190.1, Ppup096400.1, Ppup113610.1, Ppup117110.1, Ppup160680.1
GO:0071577	BP	e	zinc ion transmembrane transport	1/32	7/10157	0.0218528	9	1	1	Ppup094310.1
GO:0046085	BP	e	adenosine metabolic process	1/32	7/10157	0.0218528	9	1	1	Ppup043010.1
GO:0006751	BP	e	glutathione catabolic process	1/32	7/10157	0.0218528	7	1	1	Ppup160680.1
GO:0007566	BP	e	embryo implantation	1/32	7/10157	0.0218528	2	1	1	Ppup133260.1
GO:0044258	BP	e	intestinal lipid catabolic process	1/32	7/10157	0.0218528	5	1	1	Ppup070660.1
GO:1901565	BP	e	organonitrogen compound catabolic process	5/32	521/10157	0.0222627	4	5	1	Ppup043010.1, Ppup061580.1, Ppup083190.1, Ppup096400.1, Ppup160680.1
GO:0032469	BP	e	endoplasmic reticulum calcium ion homeostasis	1/32	8/10157	0.0249366	10	1	1	Ppup008700.1
GO:0031179	BP	e	peptide modification	1/32	8/10157	0.0249366	6	1	1	Ppup160680.1
GO:0006968	BP	e	cellular defense response	1/32	8/10157	0.0249366	4	1	1	Ppup070660.1
GO:0019439	BP	e	aromatic compound catabolic process	3/32	204/10157	0.02582	4	3	1	Ppup043010.1, Ppup083190.1, Ppup096400.1
GO:0051346	BP	e	negative regulation of hydrolase activity	2/32	80/10157	0.0260847	5	2	1	Ppup010390.1, Ppup140770.1
GO:1901361	BP	e	organic cyclic compound catabolic process	3/32	210/10157	0.0278232	4	3	1	Ppup043010.1, Ppup083190.1, Ppup096400.1
GO:0048704	BP	e	embryonic skeletal system morphogenesis	1/32	9/10157	0.028011	5	1	1	Ppup094310.1
GO:0044282	BP	e	small molecule catabolic process	3/32	213/10157	0.0288554	3	3	1	Ppup043010.1, Ppup083190.1, Ppup096400.1
GO:0042753	BP	e	positive regulation of circadian rhythm	1/32	10/10157	0.031076	4	1	1	Ppup133780.1
GO:0031937	BP	e	positive regulation of chromatin silencing	1/32	10/10157	0.031076	11	1	1	Ppup154760.1
GO:0090136	BP	e	epithelial cell-cell adhesion	1/32	10/10157	0.031076	4	1	1	Ppup140770.1
GO:0016246	BP	e	RNA interference	1/32	10/10157	0.031076	10	1	1	Ppup139080.1
GO:0006629	BP	e	lipid metabolic process	5/32	579/10157	0.0332283	3	5	1	Ppup070660.1, Ppup109070.1, Ppup113610.1, Ppup117110.1, Ppup133780.1
GO:0034976	BP	e	response to endoplasmic reticulum stress	2/32	92/10157	0.0337581	4	2	1	Ppup061580.1, Ppup133780.1
GO:0006955	BP	e	immune response	3/32	227/10157	0.033941	2	3	1	Ppup019220.1, Ppup060190.1, Ppup139080.1
GO:0045187	BP	e	regulation of circadian sleep/wake cycle, sleep	1/32	11/10157	0.0341316	5	1	1	Ppup133780.1
GO:0046130	BP	e	purine ribonucleoside catabolic process	1/32	11/10157	0.0341316	9	1	1	Ppup043010.1
GO:1903573	BP	e	negative regulation of response to endoplasmic reticulum stress	1/32	11/10157	0.0341316	7	1	1	Ppup008700.1
GO:0044092	BP	e	negative regulation of molecular function	3/32	228/10157	0.0343212	3	3	1	Ppup010390.1, Ppup133960.1, Ppup140770.1
GO:0010038	BP	e	response to metal ion	2/32	95/10157	0.0357992	4	2	1	Ppup061580.1, Ppup133960.1
GO:0098542	BP	e	defense response to other organism	3/32	236/10157	0.037443	5	3	1	Ppup019220.1, Ppup060190.1, Ppup139080.1
GO:0080134	BP	e	regulation of response to stress	4/32	407/10157	0.0376674	4	4	1	Ppup008700.1, Ppup019220.1, Ppup139080.1, Ppup160680.1
GO:0032787	BP	e	monocarboxylic acid metabolic process	3/32	240/10157	0.0390575	6	3	1	Ppup083190.1, Ppup096400.1, Ppup133780.1
GO:0006152	BP	e	purine nucleoside catabolic process	1/32	13/10157	0.0402149	8	1	1	Ppup043010.1
GO:0060173	BP	e	limb development	1/32	13/10157	0.0402149	4	1	1	Ppup094310.1
GO:0019184	BP	e	nonribosomal peptide biosynthetic process	1/32	13/10157	0.0402149	7	1	1	Ppup160680.1
GO:0070050	BP	e	neuron cellular homeostasis	1/32	13/10157	0.0402149	5	1	1	Ppup133780.1
GO:0042219	BP	e	cellular modified amino acid catabolic process	1/32	13/10157	0.0402149	5	1	1	Ppup160680.1
GO:0006750	BP	e	glutathione biosynthetic process	1/32	13/10157	0.0402149	8	1	1	Ppup160680.1
GO:0002376	BP	e	immune system process	4/32	418/10157	0.0409281	1	4	1	Ppup019220.1, Ppup060190.1, Ppup094310.1, Ppup139080.1
GO:2001243	BP	e	negative regulation of intrinsic apoptotic signaling pathway	1/32	14/10157	0.0432427	9	1	1	Ppup008700.1
GO:0045162	BP	e	clustering of voltage-gated sodium channels	1/32	14/10157	0.0432427	6	1	1	Ppup133960.1
GO:0048520	BP	e	positive regulation of behavior	1/32	14/10157	0.0432427	4	1	1	Ppup133780.1
GO:0042454	BP	e	ribonucleoside catabolic process	1/32	14/10157	0.0432427	8	1	1	Ppup043010.1
GO:0006829	BP	e	zinc ion transport	1/32	14/10157	0.0432427	8	1	1	Ppup094310.1
GO:0032101	BP	e	regulation of response to external stimulus	3/32	255/10157	0.0454268	4	3	1	Ppup019220.1, Ppup139080.1, Ppup160680.1
GO:0042749	BP	e	regulation of circadian sleep/wake cycle	1/32	15/10157	0.0462611	4	1	1	Ppup133780.1
GO:0001676	BP	e	long-chain fatty acid metabolic process	1/32	15/10157	0.0462611	8	1	1	Ppup133780.1
GO:0045161	BP	e	neuronal ion channel clustering	1/32	15/10157	0.0462611	5	1	1	Ppup133960.1
GO:0042742	BP	e	defense response to bacterium	2/32	112/10157	0.0482254	6	2	1	Ppup019220.1, Ppup060190.1
GO:0019376	BP	e	galactolipid catabolic process	1/32	16/10157	0.0492704	8	1	1	Ppup070660.1
GO:1901503	BP	e	ether biosynthetic process	1/32	16/10157	0.0492704	4	1	1	Ppup109070.1
GO:0097384	BP	e	cellular lipid biosynthetic process	1/32	16/10157	0.0492704	5	1	1	Ppup109070.1
GO:0008611	BP	e	ether lipid biosynthetic process	1/32	16/10157	0.0492704	6	1	1	Ppup109070.1
GO:0046504	BP	e	glycerol ether biosynthetic process	1/32	16/10157	0.0492704	5	1	1	Ppup109070.1
GO:0060429	BP	e	epithelium development	2/32	114/10157	0.0497783	4	2	1	Ppup063140.1, Ppup113610.1
GO:0072660	BP	e	maintenance of protein location in plasma membrane	1/32	17/10157	0.0522704	7	1	1	Ppup133960.1
GO:0072658	BP	e	maintenance of protein location in membrane	1/32	17/10157	0.0522704	6	1	1	Ppup133960.1
GO:0006103	BP	e	2-oxoglutarate metabolic process	1/32	17/10157	0.0522704	7	1	1	Ppup096410.1
GO:0015804	BP	e	neutral amino acid transport	1/32	17/10157	0.0522704	9	1	1	Ppup028060.1
GO:0098609	BP	e	cell-cell adhesion	2/32	119/10157	0.0537395	3	2	1	Ppup133260.1, Ppup140770.1
GO:0048736	BP	e	appendage development	1/32	18/10157	0.0552612	3	1	1	Ppup094310.1
GO:0046485	BP	e	ether lipid metabolic process	1/32	18/10157	0.0552612	5	1	1	Ppup109070.1
GO:0044273	BP	e	sulfur compound catabolic process	1/32	18/10157	0.0552612	4	1	1	Ppup160680.1
GO:0016575	BP	e	histone deacetylation	1/32	18/10157	0.0552612	9	1	1	Ppup154760.1
GO:0019374	BP	e	galactolipid metabolic process	1/32	18/10157	0.0552612	7	1	1	Ppup070660.1
GO:0048705	BP	e	skeletal system morphogenesis	1/32	18/10157	0.0552612	4	1	1	Ppup094310.1
GO:0044255	BP	e	cellular lipid metabolic process	4/32	468/10157	0.0577534	4	4	1	Ppup070660.1, Ppup109070.1, Ppup117110.1, Ppup133780.1
GO:0048562	BP	e	embryonic organ morphogenesis	1/32	19/10157	0.058243	4	1	1	Ppup094310.1
GO:0006476	BP	e	protein deacetylation	1/32	19/10157	0.058243	8	1	1	Ppup154760.1
GO:0072348	BP	e	sulfur compound transport	1/32	19/10157	0.058243	4	1	1	Ppup028060.1
GO:1901136	BP	e	carbohydrate derivative catabolic process	2/32	128/10157	0.0611426	4	2	1	Ppup043010.1, Ppup070660.1
GO:0072507	BP	e	divalent inorganic cation homeostasis	2/32	128/10157	0.0611426	7	2	1	Ppup008700.1, Ppup133960.1
GO:1903817	BP	e	negative regulation of voltage-gated potassium channel activity	1/32	20/10157	0.0612156	11	1	1	Ppup133960.1
GO:1902260	BP	e	negative regulation of delayed rectifier potassium channel activity	1/32	20/10157	0.0612156	12	1	1	Ppup133960.1
GO:1900825	BP	e	regulation of membrane depolarization during cardiac muscle cell action potential	1/32	20/10157	0.0612156	8	1	1	Ppup133960.1
GO:0010649	BP	e	regulation of cell communication by electrical coupling	1/32	20/10157	0.0612156	5	1	1	Ppup133960.1
GO:0010650	BP	e	positive regulation of cell communication by electrical coupling	1/32	20/10157	0.0612156	6	1	1	Ppup133960.1
GO:1900827	BP	e	positive regulation of membrane depolarization during cardiac muscle cell action potential	1/32	20/10157	0.0612156	9	1	1	Ppup133960.1
GO:0098902	BP	e	regulation of membrane depolarization during action potential	1/32	20/10157	0.0612156	7	1	1	Ppup133960.1
GO:1902259	BP	e	regulation of delayed rectifier potassium channel activity	1/32	20/10157	0.0612156	10	1	1	Ppup133960.1
GO:0034112	BP	e	positive regulation of homotypic cell-cell adhesion	1/32	20/10157	0.0612156	7	1	1	Ppup133960.1
GO:0099612	BP	e	protein localization to axon	1/32	20/10157	0.0612156	4	1	1	Ppup133960.1
GO:0016054	BP	e	organic acid catabolic process	2/32	131/10157	0.0636849	4	2	1	Ppup083190.1, Ppup096400.1
GO:0046395	BP	e	carboxylic acid catabolic process	2/32	131/10157	0.0636849	6	2	1	Ppup083190.1, Ppup096400.1
GO:0046843	BP	e	dorsal appendage formation	1/32	21/10157	0.0641791	3	1	1	Ppup113610.1
GO:0019228	BP	e	neuronal action potential	1/32	21/10157	0.0641791	5	1	1	Ppup133960.1
GO:0010166	BP	e	wax metabolic process	1/32	21/10157	0.0641791	4	1	1	Ppup109070.1
GO:0006662	BP	e	glycerol ether metabolic process	1/32	21/10157	0.0641791	4	1	1	Ppup109070.1
GO:0015807	BP	e	L-amino acid transport	1/32	21/10157	0.0641791	9	1	1	Ppup028060.1
GO:0018904	BP	e	ether metabolic process	1/32	21/10157	0.0641791	3	1	1	Ppup109070.1
GO:0010025	BP	e	wax biosynthetic process	1/32	21/10157	0.0641791	5	1	1	Ppup109070.1
GO:0035194	BP	e	posttranscriptional gene silencing by RNA	1/32	21/10157	0.0641791	9	1	1	Ppup139080.1
GO:0009164	BP	e	nucleoside catabolic process	1/32	21/10157	0.0641791	7	1	1	Ppup043010.1
GO:0002831	BP	e	regulation of response to biotic stimulus	2/32	133/10157	0.0653997	4	2	1	Ppup019220.1, Ppup139080.1
GO:0002682	BP	e	regulation of immune system process	3/32	297/10157	0.0658312	3	3	1	Ppup019220.1, Ppup139080.1, Ppup160680.1
GO:0043171	BP	e	peptide catabolic process	1/32	22/10157	0.0671335	6	1	1	Ppup160680.1
GO:0006536	BP	e	glutamate metabolic process	1/32	22/10157	0.0671335	9	1	1	Ppup160680.1
GO:1904181	BP	e	positive regulation of membrane depolarization	1/32	22/10157	0.0671335	7	1	1	Ppup133960.1
GO:0042398	BP	e	cellular modified amino acid biosynthetic process	1/32	22/10157	0.0671335	5	1	1	Ppup160680.1
GO:0045752	BP	e	positive regulation of Toll signaling pathway	1/32	23/10157	0.0700789	7	1	1	Ppup060190.1
GO:0019377	BP	e	glycolipid catabolic process	1/32	23/10157	0.0700789	7	1	1	Ppup070660.1
GO:1901017	BP	e	negative regulation of potassium ion transmembrane transporter activity	1/32	23/10157	0.0700789	10	1	1	Ppup133960.1
GO:1905897	BP	e	regulation of response to endoplasmic reticulum stress	1/32	23/10157	0.0700789	6	1	1	Ppup008700.1
GO:2000651	BP	e	positive regulation of sodium ion transmembrane transporter activity	1/32	23/10157	0.0700789	10	1	1	Ppup133960.1
GO:1902307	BP	e	positive regulation of sodium ion transmembrane transport	1/32	23/10157	0.0700789	9	1	1	Ppup133960.1
GO:0016441	BP	e	posttranscriptional gene silencing	1/32	23/10157	0.0700789	8	1	1	Ppup139080.1
GO:0034656	BP	e	nucleobase-containing small molecule catabolic process	1/32	23/10157	0.0700789	6	1	1	Ppup043010.1
GO:0045760	BP	e	positive regulation of action potential	1/32	23/10157	0.0700789	5	1	1	Ppup133960.1
GO:1901380	BP	e	negative regulation of potassium ion transmembrane transport	1/32	23/10157	0.0700789	9	1	1	Ppup133960.1
GO:0035295	BP	e	tube development	2/32	140/10157	0.0715234	3	2	1	Ppup063140.1, Ppup113610.1
GO:0071286	BP	e	cellular response to magnesium ion	1/32	24/10157	0.0730153	6	1	1	Ppup133960.1
GO:0035601	BP	e	protein deacylation	1/32	24/10157	0.0730153	7	1	1	Ppup154760.1
GO:0010765	BP	e	positive regulation of sodium ion transport	1/32	24/10157	0.0730153	8	1	1	Ppup133960.1
GO:0043267	BP	e	negative regulation of potassium ion transport	1/32	24/10157	0.0730153	8	1	1	Ppup133960.1
GO:0043086	BP	e	negative regulation of catalytic activity	2/32	142/10157	0.0733068	4	2	1	Ppup010390.1, Ppup140770.1
GO:0051187	BP	e	cofactor catabolic process	1/32	25/10157	0.0759427	4	1	1	Ppup160680.1
GO:0045838	BP	e	positive regulation of membrane potential	1/32	25/10157	0.0759427	4	1	1	Ppup133960.1
GO:0010960	BP	e	magnesium ion homeostasis	1/32	25/10157	0.0759427	8	1	1	Ppup133960.1
GO:0090314	BP	e	positive regulation of protein targeting to membrane	1/32	25/10157	0.0759427	10	1	1	Ppup133960.1
GO:0031638	BP	e	zymogen activation	1/32	25/10157	0.0759427	7	1	1	Ppup160680.1
GO:0098732	BP	e	macromolecule deacylation	1/32	25/10157	0.0759427	5	1	1	Ppup154760.1
GO:0045087	BP	e	innate immune response	2/32	147/10157	0.0778285	6	2	1	Ppup019220.1, Ppup060190.1
GO:0032026	BP	e	response to magnesium ion	1/32	26/10157	0.0788612	5	1	1	Ppup133960.1
GO:2001258	BP	e	negative regulation of cation channel activity	1/32	26/10157	0.0788612	9	1	1	Ppup133960.1
GO:0034110	BP	e	regulation of homotypic cell-cell adhesion	1/32	27/10157	0.0817707	6	1	1	Ppup133960.1
GO:0032355	BP	e	response to estradiol	1/32	27/10157	0.0817707	5	1	1	Ppup160680.1
GO:0050688	BP	e	regulation of defense response to virus	1/32	27/10157	0.0817707	6	1	1	Ppup139080.1
GO:0042592	BP	e	homeostatic process	4/32	529/10157	0.08268	3	4	1	Ppup008700.1, Ppup094310.1, Ppup133780.1, Ppup133960.1
GO:0010035	BP	e	response to inorganic substance	2/32	154/10157	0.0843048	3	2	1	Ppup061580.1, Ppup133960.1
GO:0090313	BP	e	regulation of protein targeting to membrane	1/32	28/10157	0.0846714	9	1	1	Ppup133960.1
GO:1901658	BP	e	glycosyl compound catabolic process	1/32	28/10157	0.0846714	5	1	1	Ppup043010.1
GO:0009395	BP	e	phospholipid catabolic process	1/32	28/10157	0.0846714	6	1	1	Ppup070660.1
GO:2000649	BP	e	regulation of sodium ion transmembrane transporter activity	1/32	29/10157	0.0875631	9	1	1	Ppup133960.1
GO:1902305	BP	e	regulation of sodium ion transmembrane transport	1/32	29/10157	0.0875631	8	1	1	Ppup133960.1
GO:0003333	BP	e	amino acid transmembrane transport	1/32	29/10157	0.0875631	9	1	1	Ppup028060.1
GO:0006950	BP	e	response to stress	7/32	1179/10157	0.0893354	2	7	1	Ppup019220.1, Ppup060190.1, Ppup061580.1, Ppup070660.1, Ppup133780.1, Ppup139080.1, Ppup160680.1
GO:2001242	BP	e	regulation of intrinsic apoptotic signaling pathway	1/32	30/10157	0.090446	8	1	1	Ppup008700.1
GO:0003254	BP	e	regulation of membrane depolarization	1/32	31/10157	0.0933201	6	1	1	Ppup133960.1
GO:0032413	BP	e	negative regulation of ion transmembrane transporter activity	1/32	32/10157	0.0961854	8	1	1	Ppup133960.1
GO:0032410	BP	e	negative regulation of transporter activity	1/32	32/10157	0.0961854	6	1	1	Ppup133960.1
GO:0008592	BP	e	regulation of Toll signaling pathway	1/32	32/10157	0.0961854	6	1	1	Ppup060190.1
GO:0048872	BP	e	homeostasis of number of cells	1/32	32/10157	0.0961854	4	1	1	Ppup094310.1
GO:0034612	BP	e	response to tumor necrosis factor	1/32	32/10157	0.0961854	5	1	1	Ppup160680.1
GO:0098901	BP	e	regulation of cardiac muscle cell action potential	1/32	32/10157	0.0961854	5	1	1	Ppup133960.1
GO:0046466	BP	e	membrane lipid catabolic process	1/32	33/10157	0.0990419	6	1	1	Ppup070660.1
GO:0006749	BP	e	glutathione metabolic process	1/32	33/10157	0.0990419	6	1	1	Ppup160680.1
GO:0031935	BP	e	regulation of chromatin silencing	1/32	34/10157	0.10189	10	1	1	Ppup154760.1
GO:0098900	BP	e	regulation of action potential	1/32	34/10157	0.10189	4	1	1	Ppup133960.1
GO:0002028	BP	e	regulation of sodium ion transport	1/32	34/10157	0.10189	7	1	1	Ppup133960.1
GO:0072337	BP	e	modified amino acid transport	1/32	35/10157	0.104729	5	1	1	Ppup028060.1
GO:1901016	BP	e	regulation of potassium ion transmembrane transporter activity	1/32	35/10157	0.104729	9	1	1	Ppup133960.1
GO:0043001	BP	e	Golgi to plasma membrane protein transport	1/32	36/10157	0.107559	8	1	1	Ppup133960.1
GO:0000045	BP	e	autophagosome assembly	1/32	36/10157	0.107559	7	1	1	Ppup133260.1
GO:0051017	BP	e	actin filament bundle assembly	1/32	36/10157	0.107559	7	1	1	Ppup063140.1
GO:1904063	BP	e	negative regulation of cation transmembrane transport	1/32	36/10157	0.107559	8	1	1	Ppup133960.1
GO:0072523	BP	e	purine-containing compound catabolic process	1/32	36/10157	0.107559	5	1	1	Ppup043010.1
GO:0034330	BP	e	cell junction organization	2/32	178/10157	0.107675	4	2	1	Ppup133260.1, Ppup133960.1
GO:1903533	BP	e	regulation of protein targeting	1/32	37/10157	0.110381	8	1	1	Ppup133960.1
GO:0061572	BP	e	actin filament bundle organization	1/32	37/10157	0.110381	6	1	1	Ppup063140.1
GO:0071709	BP	e	membrane assembly	1/32	37/10157	0.110381	5	1	1	Ppup133960.1
GO:0050896	BP	e	response to stimulus	10/32	1952/10157	0.111211	1	10	1	Ppup019220.1, Ppup060190.1, Ppup061580.1, Ppup070660.1, Ppup083190.1, Ppup096400.1, Ppup133780.1, Ppup133960.1, Ppup139080.1, Ppup160680.1
GO:2001259	BP	e	positive regulation of cation channel activity	1/32	38/10157	0.113194	9	1	1	Ppup133960.1
GO:0034766	BP	e	negative regulation of ion transmembrane transport	1/32	39/10157	0.115998	7	1	1	Ppup133960.1
GO:0050830	BP	e	defense response to Gram-positive bacterium	1/32	39/10157	0.115998	7	1	1	Ppup060190.1
GO:0044248	BP	e	cellular catabolic process	6/32	953/10157	0.116336	3	6	1	Ppup043010.1, Ppup061580.1, Ppup070660.1, Ppup083190.1, Ppup096400.1, Ppup160680.1
GO:0050795	BP	e	regulation of behavior	1/32	40/10157	0.118794	3	1	1	Ppup133780.1
GO:0051607	BP	e	defense response to virus	1/32	40/10157	0.118794	6	1	1	Ppup139080.1
GO:0050832	BP	e	defense response to fungus	1/32	40/10157	0.118794	6	1	1	Ppup060190.1
GO:0055065	BP	e	metal ion homeostasis	2/32	189/10157	0.118917	7	2	1	Ppup008700.1, Ppup133960.1
GO:2001234	BP	e	negative regulation of apoptotic signaling pathway	1/32	41/10157	0.121581	8	1	1	Ppup008700.1
GO:1905477	BP	e	positive regulation of protein localization to membrane	1/32	41/10157	0.121581	7	1	1	Ppup133960.1
GO:1901379	BP	e	regulation of potassium ion transmembrane transport	1/32	41/10157	0.121581	8	1	1	Ppup133960.1
GO:1905037	BP	e	autophagosome organization	1/32	41/10157	0.121581	6	1	1	Ppup133260.1
GO:0035220	BP	e	wing disc development	1/32	42/10157	0.12436	6	1	1	Ppup063140.1
GO:0001508	BP	e	action potential	1/32	42/10157	0.12436	4	1	1	Ppup133960.1
GO:0034763	BP	e	negative regulation of transmembrane transport	1/32	42/10157	0.12436	6	1	1	Ppup133960.1
GO:0032414	BP	e	positive regulation of ion transmembrane transporter activity	1/32	43/10157	0.12713	8	1	1	Ppup133960.1
GO:0032496	BP	e	response to lipopolysaccharide	1/32	43/10157	0.12713	5	1	1	Ppup160680.1
GO:1901570	BP	e	fatty acid derivative biosynthetic process	1/32	43/10157	0.12713	4	1	1	Ppup109070.1
GO:0032411	BP	e	positive regulation of transporter activity	1/32	43/10157	0.12713	6	1	1	Ppup133960.1
GO:0050727	BP	e	regulation of inflammatory response	1/32	43/10157	0.12713	6	1	1	Ppup160680.1
GO:1904064	BP	e	positive regulation of cation transmembrane transport	1/32	44/10157	0.129892	8	1	1	Ppup133960.1
GO:0022409	BP	e	positive regulation of cell-cell adhesion	1/32	44/10157	0.129892	6	1	1	Ppup133960.1
GO:0061951	BP	e	establishment of protein localization to plasma membrane	1/32	44/10157	0.129892	7	1	1	Ppup133960.1
GO:0002237	BP	e	response to molecule of bacterial origin	1/32	44/10157	0.129892	4	1	1	Ppup160680.1
GO:0043266	BP	e	regulation of potassium ion transport	1/32	45/10157	0.132645	7	1	1	Ppup133960.1
GO:0034767	BP	e	positive regulation of ion transmembrane transport	1/32	45/10157	0.132645	7	1	1	Ppup133960.1
GO:0030433	BP	e	ubiquitin-dependent ERAD pathway	1/32	46/10157	0.13539	10	1	1	Ppup061580.1
GO:0030162	BP	e	regulation of proteolysis	2/32	206/10157	0.136845	6	2	1	Ppup010390.1, Ppup140770.1
GO:0006893	BP	e	Golgi to plasma membrane transport	1/32	47/10157	0.138126	7	1	1	Ppup133960.1
GO:0055080	BP	e	cation homeostasis	2/32	211/10157	0.142232	6	2	1	Ppup008700.1, Ppup133960.1
GO:0098771	BP	e	inorganic ion homeostasis	2/32	212/10157	0.143315	6	2	1	Ppup008700.1, Ppup133960.1
GO:0007009	BP	e	plasma membrane organization	1/32	50/10157	0.146285	5	1	1	Ppup133960.1
GO:0007517	BP	e	muscle organ development	1/32	50/10157	0.146285	4	1	1	Ppup124350.1
GO:1905269	BP	e	positive regulation of chromatin organization	1/32	50/10157	0.146285	8	1	1	Ppup154760.1
GO:0006508	BP	e	proteolysis	4/32	654/10157	0.147674	5	4	1	Ppup060190.1, Ppup061580.1, Ppup063140.1, Ppup160680.1
GO:0034599	BP	e	cellular response to oxidative stress	1/32	51/10157	0.148988	5	1	1	Ppup160680.1
GO:0009064	BP	e	glutamine family amino acid metabolic process	1/32	51/10157	0.148988	8	1	1	Ppup160680.1
GO:0036503	BP	e	ERAD pathway	1/32	52/10157	0.151683	8	1	1	Ppup061580.1
GO:0043271	BP	e	negative regulation of ion transport	1/32	52/10157	0.151683	6	1	1	Ppup133960.1
GO:1903509	BP	e	liposaccharide metabolic process	1/32	53/10157	0.154369	4	1	1	Ppup070660.1
GO:0000041	BP	e	transition metal ion transport	1/32	53/10157	0.154369	7	1	1	Ppup094310.1
GO:0000381	BP	e	regulation of alternative mRNA splicing, via spliceosome	1/32	53/10157	0.154369	10	1	1	Ppup139080.1
GO:0007528	BP	e	neuromuscular junction development	1/32	53/10157	0.154369	6	1	1	Ppup133960.1
GO:0006664	BP	e	glycolipid metabolic process	1/32	53/10157	0.154369	6	1	1	Ppup070660.1
GO:0009620	BP	e	response to fungus	1/32	53/10157	0.154369	5	1	1	Ppup060190.1
GO:0031047	BP	e	gene silencing by RNA	1/32	53/10157	0.154369	8	1	1	Ppup139080.1
GO:0070887	BP	e	cellular response to chemical stimulus	3/32	434/10157	0.155032	3	3	1	Ppup061580.1, Ppup133960.1, Ppup160680.1
GO:0008340	BP	e	determination of adult lifespan	1/32	54/10157	0.157047	2	1	1	Ppup154760.1
GO:0034764	BP	e	positive regulation of transmembrane transport	1/32	54/10157	0.157047	6	1	1	Ppup133960.1
GO:0032507	BP	e	maintenance of protein location in cell	1/32	56/10157	0.162379	5	1	1	Ppup133960.1
GO:0034220	BP	e	ion transmembrane transport	2/32	231/10157	0.164221	5	2	1	Ppup028060.1, Ppup094310.1
GO:0051336	BP	e	regulation of hydrolase activity	2/32	231/10157	0.164221	4	2	1	Ppup010390.1, Ppup140770.1
GO:2001257	BP	e	regulation of cation channel activity	1/32	57/10157	0.165033	8	1	1	Ppup133960.1
GO:0006865	BP	e	amino acid transport	1/32	58/10157	0.167678	8	1	1	Ppup028060.1
GO:0042752	BP	e	regulation of circadian rhythm	1/32	58/10157	0.167678	3	1	1	Ppup133780.1
GO:0090316	BP	e	positive regulation of intracellular protein transport	1/32	58/10157	0.167678	8	1	1	Ppup133960.1
GO:1905475	BP	e	regulation of protein localization to membrane	1/32	58/10157	0.167678	6	1	1	Ppup133960.1
GO:0060548	BP	e	negative regulation of cell death	2/32	235/10157	0.168694	5	2	1	Ppup006550.1, Ppup008700.1
GO:0019730	BP	e	antimicrobial humoral response	1/32	59/10157	0.170315	5	1	1	Ppup139080.1
GO:0050801	BP	e	ion homeostasis	2/32	243/10157	0.177706	5	2	1	Ppup008700.1, Ppup133960.1
GO:0006892	BP	e	post-Golgi vesicle-mediated transport	1/32	63/10157	0.180784	6	1	1	Ppup133960.1
GO:0006959	BP	e	humoral immune response	1/32	63/10157	0.180784	3	1	1	Ppup139080.1
GO:0009615	BP	e	response to virus	1/32	63/10157	0.180784	5	1	1	Ppup139080.1
GO:0062197	BP	e	cellular response to chemical stress	1/32	63/10157	0.180784	4	1	1	Ppup160680.1
GO:1901568	BP	e	fatty acid derivative metabolic process	1/32	64/10157	0.183381	3	1	1	Ppup109070.1
GO:0009888	BP	e	tissue development	2/32	250/10157	0.185656	3	2	1	Ppup063140.1, Ppup113610.1
GO:0060968	BP	e	regulation of gene silencing	1/32	65/10157	0.18597	6	1	1	Ppup154760.1
GO:0010605	BP	e	negative regulation of macromolecule metabolic process	5/32	853/10157	0.186265	5	5	1	Ppup010390.1, Ppup124350.1, Ppup139080.1, Ppup140770.1, Ppup154760.1
GO:1905039	BP	e	carboxylic acid transmembrane transport	1/32	66/10157	0.188551	8	1	1	Ppup028060.1
GO:1903825	BP	e	organic acid transmembrane transport	1/32	66/10157	0.188551	6	1	1	Ppup028060.1
GO:0051651	BP	e	maintenance of location in cell	1/32	66/10157	0.188551	4	1	1	Ppup133960.1
GO:0007568	BP	e	aging	1/32	66/10157	0.188551	2	1	1	Ppup160680.1
GO:0001701	BP	e	in utero embryonic development	1/32	67/10157	0.191124	7	1	1	Ppup094310.1
GO:0098876	BP	e	vesicle-mediated transport to the plasma membrane	1/32	67/10157	0.191124	5	1	1	Ppup133960.1
GO:0000122	BP	e	negative regulation of transcription by RNA polymerase II	2/32	255/10157	0.191369	11	2	1	Ppup124350.1, Ppup154760.1
GO:0019725	BP	e	cellular homeostasis	2/32	255/10157	0.191369	4	2	1	Ppup008700.1, Ppup133780.1
GO:0043270	BP	e	positive regulation of ion transport	1/32	68/10157	0.19369	6	1	1	Ppup133960.1
GO:0007155	BP	e	cell adhesion	2/32	258/10157	0.194809	2	2	1	Ppup133260.1, Ppup140770.1
GO:0043009	BP	e	chordate embryonic development	1/32	69/10157	0.196247	6	1	1	Ppup094310.1
GO:0022407	BP	e	regulation of cell-cell adhesion	1/32	69/10157	0.196247	5	1	1	Ppup133960.1
GO:0045088	BP	e	regulation of innate immune response	1/32	69/10157	0.196247	6	1	1	Ppup019220.1
GO:0046434	BP	e	organophosphate catabolic process	1/32	69/10157	0.196247	5	1	1	Ppup070660.1
GO:0048024	BP	e	regulation of mRNA splicing, via spliceosome	1/32	70/10157	0.198797	9	1	1	Ppup139080.1
GO:0032412	BP	e	regulation of ion transmembrane transporter activity	1/32	70/10157	0.198797	7	1	1	Ppup133960.1
GO:0022898	BP	e	regulation of transmembrane transporter activity	1/32	70/10157	0.198797	6	1	1	Ppup133960.1
GO:0032409	BP	e	regulation of transporter activity	1/32	70/10157	0.198797	3	1	1	Ppup133960.1
GO:0000281	BP	e	mitotic cytokinesis	1/32	72/10157	0.203872	5	1	1	Ppup133960.1
GO:0045185	BP	e	maintenance of protein location	1/32	72/10157	0.203872	4	1	1	Ppup133960.1
GO:0032388	BP	e	positive regulation of intracellular transport	1/32	72/10157	0.203872	6	1	1	Ppup133960.1
GO:0022610	BP	e	biological adhesion	2/32	266/10157	0.204024	1	2	1	Ppup133260.1, Ppup140770.1
GO:0032269	BP	e	negative regulation of cellular protein metabolic process	2/32	269/10157	0.207494	7	2	1	Ppup010390.1, Ppup140770.1
GO:0045785	BP	e	positive regulation of cell adhesion	1/32	74/10157	0.208917	5	1	1	Ppup133960.1
GO:0007033	BP	e	vacuole organization	1/32	74/10157	0.208917	5	1	1	Ppup133260.1
GO:0009892	BP	e	negative regulation of metabolic process	5/32	928/10157	0.209404	4	5	1	Ppup010390.1, Ppup124350.1, Ppup139080.1, Ppup140770.1, Ppup154760.1
GO:0008610	BP	e	lipid biosynthetic process	2/32	272/10157	0.210971	4	2	1	Ppup109070.1, Ppup133780.1
GO:2001252	BP	e	positive regulation of chromosome organization	1/32	75/10157	0.211428	7	1	1	Ppup154760.1
GO:0072511	BP	e	divalent inorganic cation transport	1/32	77/10157	0.216426	6	1	1	Ppup094310.1
GO:0070838	BP	e	divalent metal ion transport	1/32	77/10157	0.216426	7	1	1	Ppup094310.1
GO:0016485	BP	e	protein processing	1/32	77/10157	0.216426	6	1	1	Ppup160680.1
GO:0006633	BP	e	fatty acid biosynthetic process	1/32	78/10157	0.218913	8	1	1	Ppup133780.1
GO:0044272	BP	e	sulfur compound biosynthetic process	1/32	80/10157	0.223865	4	1	1	Ppup160680.1
GO:0009953	BP	e	dorsal/ventral pattern formation	1/32	80/10157	0.223865	4	1	1	Ppup142250.1
GO:2001233	BP	e	regulation of apoptotic signaling pathway	1/32	81/10157	0.22633	7	1	1	Ppup008700.1
GO:0043484	BP	e	regulation of RNA splicing	1/32	81/10157	0.22633	7	1	1	Ppup139080.1
GO:0007586	BP	e	digestion	1/32	81/10157	0.22633	2	1	1	Ppup117110.1
GO:0005975	BP	e	carbohydrate metabolic process	2/32	287/10157	0.228449	3	2	1	Ppup002810.1, Ppup019220.1
GO:0051248	BP	e	negative regulation of protein metabolic process	2/32	289/10157	0.23079	6	2	1	Ppup010390.1, Ppup140770.1
GO:1904062	BP	e	regulation of cation transmembrane transport	1/32	83/10157	0.231237	7	1	1	Ppup133960.1
GO:0000910	BP	e	cytokinesis	1/32	85/10157	0.236113	3	1	1	Ppup133960.1
GO:0061640	BP	e	cytoskeleton-dependent cytokinesis	1/32	85/10157	0.236113	4	1	1	Ppup133960.1
GO:0048519	BP	e	negative regulation of biological process	8/32	1740/10157	0.239613	3	8	1	Ppup006550.1, Ppup008700.1, Ppup010390.1, Ppup124350.1, Ppup133960.1, Ppup139080.1, Ppup140770.1, Ppup154760.1
GO:0072330	BP	e	monocarboxylic acid biosynthetic process	1/32	88/10157	0.243372	7	1	1	Ppup133780.1
GO:0098656	BP	e	anion transmembrane transport	1/32	88/10157	0.243372	6	1	1	Ppup028060.1
GO:0006874	BP	e	cellular calcium ion homeostasis	1/32	91/10157	0.250563	9	1	1	Ppup008700.1
GO:0010959	BP	e	regulation of metal ion transport	1/32	92/10157	0.252946	6	1	1	Ppup133960.1
GO:0090150	BP	e	establishment of protein localization to membrane	1/32	93/10157	0.255321	6	1	1	Ppup133960.1
GO:0006643	BP	e	membrane lipid metabolic process	1/32	96/10157	0.262402	5	1	1	Ppup070660.1
GO:0007409	BP	e	axonogenesis	1/32	96/10157	0.262402	9	1	1	Ppup133960.1
GO:0055074	BP	e	calcium ion homeostasis	1/32	97/10157	0.264748	8	1	1	Ppup008700.1
GO:0016458	BP	e	gene silencing	1/32	97/10157	0.264748	7	1	1	Ppup139080.1
GO:0044242	BP	e	cellular lipid catabolic process	1/32	99/10157	0.269419	5	1	1	Ppup070660.1
GO:0042737	BP	e	drug catabolic process	1/32	99/10157	0.269419	4	1	1	Ppup043010.1
GO:0072503	BP	e	cellular divalent inorganic cation homeostasis	1/32	100/10157	0.271743	8	1	1	Ppup008700.1
GO:0000902	BP	e	cell morphogenesis	1/32	101/10157	0.27406	3	1	1	Ppup094310.1
GO:0050684	BP	e	regulation of mRNA processing	1/32	101/10157	0.27406	8	1	1	Ppup139080.1
GO:0006457	BP	e	protein folding	1/32	101/10157	0.27406	2	1	1	Ppup061580.1
GO:0034097	BP	e	response to cytokine	1/32	102/10157	0.27637	4	1	1	Ppup160680.1
GO:0034329	BP	e	cell junction assembly	1/32	102/10157	0.27637	5	1	1	Ppup133260.1
GO:0007015	BP	e	actin filament organization	1/32	103/10157	0.278673	5	1	1	Ppup063140.1
GO:0050808	BP	e	synapse organization	1/32	104/10157	0.280969	5	1	1	Ppup133960.1
GO:1903829	BP	e	positive regulation of cellular protein localization	1/32	104/10157	0.280969	6	1	1	Ppup133960.1
GO:0051172	BP	e	negative regulation of nitrogen compound metabolic process	4/32	716/10157	0.281848	5	4	1	Ppup010390.1, Ppup124350.1, Ppup140770.1, Ppup154760.1
GO:0048878	BP	e	chemical homeostasis	2/32	333/10157	0.282588	4	2	1	Ppup008700.1, Ppup133960.1
GO:0009792	BP	e	embryo development ending in birth or egg hatching	1/32	105/10157	0.283258	5	1	1	Ppup094310.1
GO:0044238	BP	e	primary metabolic process	17/32	4361/10157	0.284129	2	17	1	Ppup002810.1, Ppup019220.1, Ppup043010.1, Ppup060190.1, Ppup061580.1, Ppup063140.1, Ppup070660.1, Ppup083190.1, Ppup096400.1, Ppup096410.1, Ppup109070.1, Ppup113610.1, Ppup117110.1, Ppup133780.1, Ppup139080.1, Ppup154760.1, Ppup160680.1
GO:1902275	BP	e	regulation of chromatin organization	1/32	106/10157	0.28554	7	1	1	Ppup154760.1
GO:0072659	BP	e	protein localization to plasma membrane	1/32	106/10157	0.28554	6	1	1	Ppup133960.1
GO:0071704	BP	e	organic substance metabolic process	18/32	4635/10157	0.286241	2	18	1	Ppup002810.1, Ppup006550.1, Ppup019220.1, Ppup043010.1, Ppup060190.1, Ppup061580.1, Ppup063140.1, Ppup070660.1, Ppup083190.1, Ppup096400.1, Ppup096410.1, Ppup109070.1, Ppup113610.1, Ppup117110.1, Ppup133780.1, Ppup139080.1, Ppup154760.1, Ppup160680.1
GO:0009790	BP	e	embryo development	1/32	107/10157	0.287814	4	1	1	Ppup094310.1
GO:0051235	BP	e	maintenance of location	1/32	107/10157	0.287814	3	1	1	Ppup133960.1
GO:0055085	BP	e	transmembrane transport	2/32	345/10157	0.296737	4	2	1	Ppup028060.1, Ppup094310.1
GO:0046128	BP	e	purine ribonucleoside metabolic process	1/32	111/10157	0.296843	8	1	1	Ppup043010.1
GO:0009119	BP	e	ribonucleoside metabolic process	1/32	114/10157	0.303542	7	1	1	Ppup043010.1
GO:0042278	BP	e	purine nucleoside metabolic process	1/32	114/10157	0.303542	7	1	1	Ppup043010.1
GO:0040029	BP	e	regulation of gene expression, epigenetic	1/32	116/10157	0.307973	6	1	1	Ppup139080.1
GO:0002697	BP	e	regulation of immune effector process	1/32	116/10157	0.307973	4	1	1	Ppup139080.1
GO:0033157	BP	e	regulation of intracellular protein transport	1/32	116/10157	0.307973	7	1	1	Ppup133960.1
GO:0051222	BP	e	positive regulation of protein transport	1/32	117/10157	0.310179	7	1	1	Ppup133960.1
GO:0031324	BP	e	negative regulation of cellular metabolic process	4/32	792/10157	0.310721	5	4	1	Ppup010390.1, Ppup124350.1, Ppup140770.1, Ppup154760.1
GO:0051604	BP	e	protein maturation	1/32	118/10157	0.312377	5	1	1	Ppup160680.1
GO:1990778	BP	e	protein localization to cell periphery	1/32	119/10157	0.314569	5	1	1	Ppup133960.1
GO:1902532	BP	e	negative regulation of intracellular signal transduction	1/32	120/10157	0.316754	7	1	1	Ppup008700.1
GO:0034765	BP	e	regulation of ion transmembrane transport	1/32	122/10157	0.321104	6	1	1	Ppup133960.1
GO:0048523	BP	e	negative regulation of cellular process	7/32	1563/10157	0.322954	4	7	1	Ppup006550.1, Ppup008700.1, Ppup010390.1, Ppup124350.1, Ppup133960.1, Ppup140770.1, Ppup154760.1
GO:0006979	BP	e	response to oxidative stress	1/32	125/10157	0.327579	3	1	1	Ppup160680.1
GO:1904951	BP	e	positive regulation of establishment of protein localization	1/32	126/10157	0.329724	6	1	1	Ppup133960.1
GO:0098662	BP	e	inorganic cation transmembrane transport	1/32	127/10157	0.331862	7	1	1	Ppup094310.1
GO:0061061	BP	e	muscle structure development	1/32	128/10157	0.333993	3	1	1	Ppup124350.1
GO:0002252	BP	e	immune effector process	1/32	131/10157	0.340349	2	1	1	Ppup139080.1
GO:0009116	BP	e	nucleoside metabolic process	1/32	134/10157	0.346646	6	1	1	Ppup043010.1
GO:0051188	BP	e	cofactor biosynthetic process	1/32	135/10157	0.348732	4	1	1	Ppup160680.1
GO:0046942	BP	e	carboxylic acid transport	1/32	137/10157	0.352884	7	1	1	Ppup028060.1
GO:0015849	BP	e	organic acid transport	1/32	137/10157	0.352884	5	1	1	Ppup028060.1
GO:0030155	BP	e	regulation of cell adhesion	1/32	138/10157	0.354951	4	1	1	Ppup133960.1
GO:0034762	BP	e	regulation of transmembrane transport	1/32	138/10157	0.354951	5	1	1	Ppup133960.1
GO:0007283	BP	e	spermatogenesis	1/32	138/10157	0.354951	5	1	1	Ppup160680.1
GO:0060249	BP	e	anatomical structure homeostasis	1/32	139/10157	0.357011	4	1	1	Ppup133780.1
GO:0098655	BP	e	cation transmembrane transport	1/32	141/10157	0.361112	6	1	1	Ppup094310.1
GO:0048232	BP	e	male gamete generation	1/32	142/10157	0.363154	4	1	1	Ppup160680.1
GO:0006875	BP	e	cellular metal ion homeostasis	1/32	143/10157	0.365188	8	1	1	Ppup008700.1
GO:0045892	BP	e	negative regulation of transcription, DNA-templated	2/32	404/10157	0.365603	10	2	1	Ppup124350.1, Ppup154760.1
GO:1903507	BP	e	negative regulation of nucleic acid-templated transcription	2/32	405/10157	0.366754	9	2	1	Ppup124350.1, Ppup154760.1
GO:1902679	BP	e	negative regulation of RNA biosynthetic process	2/32	405/10157	0.366754	8	2	1	Ppup124350.1, Ppup154760.1
GO:0098660	BP	e	inorganic ion transmembrane transport	1/32	146/10157	0.371255	6	1	1	Ppup094310.1
GO:0008152	BP	e	metabolic process	18/32	4872/10157	0.37923	1	18	1	Ppup002810.1, Ppup006550.1, Ppup019220.1, Ppup043010.1, Ppup060190.1, Ppup061580.1, Ppup063140.1, Ppup070660.1, Ppup083190.1, Ppup096400.1, Ppup096410.1, Ppup109070.1, Ppup113610.1, Ppup117110.1, Ppup133780.1, Ppup139080.1, Ppup154760.1, Ppup160680.1
GO:0051051	BP	e	negative regulation of transport	1/32	151/10157	0.381242	5	1	1	Ppup133960.1
GO:0042391	BP	e	regulation of membrane potential	1/32	152/10157	0.383221	3	1	1	Ppup133960.1
GO:0033993	BP	e	response to lipid	1/32	152/10157	0.383221	4	1	1	Ppup160680.1
GO:1901657	BP	e	glycosyl compound metabolic process	1/32	152/10157	0.383221	4	1	1	Ppup043010.1
GO:0032386	BP	e	regulation of intracellular transport	1/32	153/10157	0.385194	5	1	1	Ppup133960.1
GO:0046394	BP	e	carboxylic acid biosynthetic process	1/32	154/10157	0.38716	6	1	1	Ppup133780.1
GO:1903311	BP	e	regulation of mRNA metabolic process	1/32	155/10157	0.389121	7	1	1	Ppup139080.1
GO:0016053	BP	e	organic acid biosynthetic process	1/32	156/10157	0.391075	4	1	1	Ppup133780.1
GO:0006631	BP	e	fatty acid metabolic process	1/32	161/10157	0.400757	7	1	1	Ppup133780.1
GO:0034655	BP	e	nucleobase-containing compound catabolic process	1/32	161/10157	0.400757	5	1	1	Ppup043010.1
GO:0010941	BP	e	regulation of cell death	2/32	435/10157	0.400927	4	2	1	Ppup006550.1, Ppup008700.1
GO:0030003	BP	e	cellular cation homeostasis	1/32	164/10157	0.406494	7	1	1	Ppup008700.1
GO:0048583	BP	e	regulation of response to stimulus	5/32	1169/10157	0.408041	3	5	1	Ppup008700.1, Ppup019220.1, Ppup060190.1, Ppup139080.1, Ppup160680.1
GO:0006873	BP	e	cellular ion homeostasis	1/32	166/10157	0.410289	6	1	1	Ppup008700.1
GO:0043269	BP	e	regulation of ion transport	1/32	166/10157	0.410289	5	1	1	Ppup133960.1
GO:0006417	BP	e	regulation of translation	1/32	168/10157	0.414061	7	1	1	Ppup139080.1
GO:0043043	BP	e	peptide biosynthetic process	1/32	169/10157	0.415938	6	1	1	Ppup160680.1
GO:0014070	BP	e	response to organic cyclic compound	1/32	171/10157	0.419675	4	1	1	Ppup160680.1
GO:0009725	BP	e	response to hormone	1/32	173/10157	0.423388	4	1	1	Ppup160680.1
GO:0048598	BP	e	embryonic morphogenesis	1/32	175/10157	0.427079	3	1	1	Ppup094310.1
GO:0009058	BP	e	biosynthetic process	6/32	1364/10157	0.430489	2	6	1	Ppup083190.1, Ppup096400.1, Ppup096410.1, Ppup109070.1, Ppup133780.1, Ppup160680.1
GO:0050776	BP	e	regulation of immune response	1/32	177/10157	0.430746	4	1	1	Ppup019220.1
GO:0006644	BP	e	phospholipid metabolic process	1/32	180/10157	0.436205	5	1	1	Ppup070660.1
GO:0000398	BP	e	mRNA splicing, via spliceosome	1/32	182/10157	0.439816	11	1	1	Ppup139080.1
GO:0044270	BP	e	cellular nitrogen compound catabolic process	1/32	182/10157	0.439816	4	1	1	Ppup043010.1
GO:0000377	BP	e	RNA splicing, via transesterification reactions with bulged adenosine as nucleophile	1/32	182/10157	0.439816	10	1	1	Ppup139080.1
GO:0010629	BP	e	negative regulation of gene expression	3/32	615/10157	0.440835	6	3	1	Ppup124350.1, Ppup139080.1, Ppup154760.1
GO:0097435	BP	e	supramolecular fiber organization	1/32	183/10157	0.441613	4	1	1	Ppup063140.1
GO:0048193	BP	e	Golgi vesicle transport	1/32	184/10157	0.443405	5	1	1	Ppup133960.1
GO:0055082	BP	e	cellular chemical homeostasis	1/32	184/10157	0.443405	5	1	1	Ppup008700.1
GO:0000375	BP	e	RNA splicing, via transesterification reactions	1/32	184/10157	0.443405	9	1	1	Ppup139080.1
GO:0046700	BP	e	heterocycle catabolic process	1/32	185/10157	0.445191	4	1	1	Ppup043010.1
GO:0065009	BP	e	regulation of molecular function	3/32	632/10157	0.4483	2	3	1	Ppup010390.1, Ppup133960.1, Ppup140770.1
GO:0006790	BP	e	sulfur compound metabolic process	1/32	190/10157	0.454037	3	1	1	Ppup160680.1
GO:0048513	BP	e	animal organ development	3/32	651/10157	0.457155	3	3	1	Ppup063140.1, Ppup113610.1, Ppup124350.1
GO:0043066	BP	e	negative regulation of apoptotic process	1/32	192/10157	0.457537	7	1	1	Ppup008700.1
GO:0072657	BP	e	protein localization to membrane	1/32	193/10157	0.459279	5	1	1	Ppup133960.1
GO:0015711	BP	e	organic anion transport	1/32	194/10157	0.461016	6	1	1	Ppup028060.1
GO:0008283	BP	e	cell population proliferation	1/32	194/10157	0.461016	2	1	1	Ppup124350.1
GO:0034248	BP	e	regulation of cellular amide metabolic process	1/32	200/10157	0.471322	5	1	1	Ppup139080.1
GO:1903827	BP	e	regulation of cellular protein localization	1/32	200/10157	0.471322	5	1	1	Ppup133960.1
GO:0043069	BP	e	negative regulation of programmed cell death	1/32	202/10157	0.474715	6	1	1	Ppup008700.1
GO:0033044	BP	e	regulation of chromosome organization	1/32	203/10157	0.476404	6	1	1	Ppup154760.1
GO:0048812	BP	e	neuron projection morphogenesis	1/32	203/10157	0.476404	8	1	1	Ppup133960.1
GO:0120039	BP	e	plasma membrane bounded cell projection morphogenesis	1/32	204/10157	0.478087	7	1	1	Ppup133960.1
GO:0007411	BP	e	axon guidance	1/32	206/10157	0.481438	4	1	1	Ppup133960.1
GO:0048858	BP	e	cell projection morphogenesis	1/32	206/10157	0.481438	6	1	1	Ppup133960.1
GO:0097485	BP	e	neuron projection guidance	1/32	213/10157	0.493002	3	1	1	Ppup133960.1
GO:0033554	BP	e	cellular response to stress	3/32	727/10157	0.496848	3	3	1	Ppup061580.1, Ppup133780.1, Ppup160680.1
GO:0032990	BP	e	cell part morphogenesis	1/32	219/10157	0.502715	5	1	1	Ppup133960.1
GO:0032989	BP	e	cellular component morphogenesis	1/32	219/10157	0.502715	4	1	1	Ppup133960.1
GO:0010608	BP	e	posttranscriptional regulation of gene expression	1/32	219/10157	0.502715	6	1	1	Ppup139080.1
GO:0016570	BP	e	histone modification	1/32	220/10157	0.504317	7	1	1	Ppup154760.1
GO:0051223	BP	e	regulation of protein transport	1/32	221/10157	0.505913	6	1	1	Ppup133960.1
GO:0016569	BP	e	covalent chromatin modification	1/32	222/10157	0.507504	5	1	1	Ppup154760.1
GO:0006820	BP	e	anion transport	1/32	222/10157	0.507504	5	1	1	Ppup028060.1
GO:0030001	BP	e	metal ion transport	1/32	223/10157	0.509091	6	1	1	Ppup094310.1
GO:0043604	BP	e	amide biosynthetic process	1/32	225/10157	0.512248	5	1	1	Ppup160680.1
GO:0080135	BP	e	regulation of cellular response to stress	1/32	225/10157	0.512248	5	1	1	Ppup008700.1
GO:0006518	BP	e	peptide metabolic process	1/32	229/10157	0.518505	5	1	1	Ppup160680.1
GO:0070201	BP	e	regulation of establishment of protein localization	1/32	232/10157	0.523146	5	1	1	Ppup133960.1
GO:0010243	BP	e	response to organonitrogen compound	1/32	233/10157	0.524684	4	1	1	Ppup061580.1
GO:0010638	BP	e	positive regulation of organelle organization	1/32	233/10157	0.524684	6	1	1	Ppup154760.1
GO:0090087	BP	e	regulation of peptide transport	1/32	233/10157	0.524684	5	1	1	Ppup133960.1
GO:0007276	BP	e	gamete generation	1/32	241/10157	0.536812	3	1	1	Ppup160680.1
GO:0051186	BP	e	cofactor metabolic process	1/32	243/10157	0.539797	3	1	1	Ppup160680.1
GO:1901698	BP	e	response to nitrogen compound	1/32	250/10157	0.550097	3	1	1	Ppup061580.1
GO:0017144	BP	e	drug metabolic process	1/32	252/10157	0.552999	3	1	1	Ppup043010.1
GO:0009887	BP	e	animal organ morphogenesis	1/32	253/10157	0.554443	3	1	1	Ppup094310.1
GO:0009719	BP	e	response to endogenous stimulus	1/32	257/10157	0.560175	2	1	1	Ppup160680.1
GO:0061024	BP	e	membrane organization	1/32	259/10157	0.563014	4	1	1	Ppup133960.1
GO:0070925	BP	e	organelle assembly	1/32	260/10157	0.564426	5	1	1	Ppup133260.1
GO:0051716	BP	e	cellular response to stimulus	4/32	1044/10157	0.565353	2	4	1	Ppup061580.1, Ppup133780.1, Ppup133960.1, Ppup160680.1
GO:0008380	BP	e	RNA splicing	1/32	261/10157	0.565835	8	1	1	Ppup139080.1
GO:0051050	BP	e	positive regulation of transport	1/32	261/10157	0.565835	5	1	1	Ppup133960.1
GO:0003002	BP	e	regionalization	1/32	265/10157	0.571424	3	1	1	Ppup142250.1
GO:0043161	BP	e	proteasome-mediated ubiquitin-dependent protein catabolic process	1/32	269/10157	0.576944	9	1	1	Ppup061580.1
GO:0010498	BP	e	proteasomal protein catabolic process	1/32	284/10157	0.597036	7	1	1	Ppup061580.1
GO:0044283	BP	e	small molecule biosynthetic process	1/32	286/10157	0.599644	3	1	1	Ppup133780.1
GO:0006812	BP	e	cation transport	1/32	291/10157	0.606093	5	1	1	Ppup094310.1
GO:0072521	BP	e	purine-containing compound metabolic process	1/32	292/10157	0.60737	4	1	1	Ppup043010.1
GO:0051253	BP	e	negative regulation of RNA metabolic process	2/32	445/10157	0.650056	7	2	1	Ppup124350.1, Ppup154760.1
GO:0050790	BP	e	regulation of catalytic activity	2/32	463/10157	0.656279	3	2	1	Ppup010390.1, Ppup140770.1
GO:2000113	BP	e	negative regulation of cellular macromolecule biosynthetic process	2/32	480/10157	0.662558	7	2	1	Ppup124350.1, Ppup154760.1
GO:0010647	BP	e	positive regulation of cell communication	2/32	486/10157	0.664856	5	2	1	Ppup060190.1, Ppup133960.1
GO:0010558	BP	e	negative regulation of macromolecule biosynthetic process	2/32	488/10157	0.665631	6	2	1	Ppup124350.1, Ppup154760.1
GO:0045934	BP	e	negative regulation of nucleobase-containing compound metabolic process	2/32	488/10157	0.665631	6	2	1	Ppup124350.1, Ppup154760.1
GO:0031327	BP	e	negative regulation of cellular biosynthetic process	2/32	492/10157	0.667194	6	2	1	Ppup124350.1, Ppup154760.1
GO:0006811	BP	e	ion transport	2/32	496/10157	0.668773	4	2	1	Ppup028060.1, Ppup094310.1
GO:0009890	BP	e	negative regulation of biosynthetic process	2/32	499/10157	0.669967	5	2	1	Ppup124350.1, Ppup154760.1
GO:1901564	BP	e	organonitrogen compound metabolic process	9/32	2496/10157	0.68083	3	9	1	Ppup043010.1, Ppup060190.1, Ppup061580.1, Ppup063140.1, Ppup083190.1, Ppup096400.1, Ppup096410.1, Ppup154760.1, Ppup160680.1
GO:1901135	BP	e	carbohydrate derivative metabolic process	2/32	548/10157	0.690507	3	2	1	Ppup043010.1, Ppup070660.1
GO:0003006	BP	e	developmental process involved in reproduction	2/32	549/10157	0.690942	2	2	1	Ppup113610.1, Ppup160680.1
GO:0010033	BP	e	response to organic substance	2/32	570/10157	0.700196	3	2	1	Ppup061580.1, Ppup160680.1
GO:0016192	BP	e	vesicle-mediated transport	2/32	586/10157	0.707357	4	2	1	Ppup006550.1, Ppup133960.1
GO:0032268	BP	e	regulation of cellular protein metabolic process	3/32	770/10157	0.731903	6	3	1	Ppup010390.1, Ppup139080.1, Ppup140770.1
GO:0042221	BP	e	response to chemical	3/32	780/10157	0.73356	2	3	1	Ppup061580.1, Ppup133960.1, Ppup160680.1
GO:0071705	BP	e	nitrogen compound transport	3/32	850/10157	0.747352	4	3	1	Ppup006550.1, Ppup028060.1, Ppup133960.1
GO:0022414	BP	e	reproductive process	3/32	856/10157	0.748688	1	3	1	Ppup113610.1, Ppup133260.1, Ppup160680.1
GO:0051246	BP	e	regulation of protein metabolic process	3/32	862/10157	0.750044	5	3	1	Ppup010390.1, Ppup139080.1, Ppup140770.1
GO:0008150	BP	e	biological_process	28/32	8665/10157	1	0	28	1	Ppup002810.1, Ppup006060.1, Ppup006550.1, Ppup008700.1, Ppup010390.1, Ppup019220.1, Ppup028060.1, Ppup043010.1, Ppup060190.1, Ppup061580.1, Ppup063140.1, Ppup070660.1, Ppup083190.1, Ppup094310.1, Ppup096400.1, Ppup096410.1, Ppup109070.1, Ppup113610.1, Ppup117110.1, Ppup124350.1, Ppup133260.1, Ppup133780.1, Ppup133960.1, Ppup139080.1, Ppup140770.1, Ppup142250.1, Ppup154760.1, Ppup160680.1
GO:0030163	BP	e	protein catabolic process	1/32	316/10157	1	5	1	1	Ppup061580.1
GO:0044260	BP	p	cellular macromolecule metabolic process	2/32	2654/10157	0.00777103	4	2	1	Ppup061580.1, Ppup154760.1
GO:0090304	BP	p	nucleic acid metabolic process	1/32	1694/10157	0.0329265	5	1	1	Ppup139080.1
GO:0031325	BP	p	positive regulation of cellular metabolic process	0/32	1110/10157	0.0435931	5	0	1
GO:0006139	BP	p	nucleobase-containing compound metabolic process	2/32	2065/10157	0.0473718	4	2	1	Ppup043010.1, Ppup139080.1
GO:0046483	BP	p	heterocycle metabolic process	2/32	2144/10157	0.047578	3	2	1	Ppup043010.1, Ppup139080.1
GO:0034641	BP	p	cellular nitrogen compound metabolic process	3/32	2398/10157	0.0608836	3	3	1	Ppup043010.1, Ppup139080.1, Ppup160680.1
GO:0051173	BP	p	positive regulation of nitrogen compound metabolic process	0/32	1042/10157	0.0712963	5	0	1
GO:0044267	BP	p	cellular protein metabolic process	1/32	1446/10157	0.0765543	5	1	1	Ppup154760.1
GO:0043170	BP	p	macromolecule metabolic process	6/32	3444/10157	0.0907961	3	6	1	Ppup060190.1, Ppup061580.1, Ppup063140.1, Ppup139080.1, Ppup154760.1, Ppup160680.1
GO:0050793	BP	p	regulation of developmental process	0/32	858/10157	0.10767	3	0	1
GO:0051649	BP	p	establishment of localization in cell	0/32	882/10157	0.108736	3	0	1
GO:0043412	BP	p	macromolecule modification	1/32	1368/10157	0.115353	4	1	1	Ppup154760.1
GO:0071840	BP	p	cellular component organization or biogenesis	4/32	2481/10157	0.148488	2	4	1	Ppup063140.1, Ppup133260.1, Ppup133960.1, Ppup154760.1
GO:0016043	BP	p	cellular component organization	4/32	2441/10157	0.149096	3	4	1	Ppup063140.1, Ppup133260.1, Ppup133960.1, Ppup154760.1
GO:0043933	BP	p	protein-containing complex subunit organization	0/32	707/10157	0.167081	4	0	1
GO:0046907	BP	p	intracellular transport	0/32	701/10157	0.167144	4	0	1
GO:0009893	BP	p	positive regulation of metabolic process	1/32	1212/10157	0.170178	4	1	1	Ppup133960.1
GO:0006464	BP	p	cellular protein modification process	1/32	1255/10157	0.172268	6	1	1	Ppup154760.1
GO:0036211	BP	p	protein modification process	1/32	1255/10157	0.172268	5	1	1	Ppup154760.1
GO:0007165	BP	p	signal transduction	1/32	1261/10157	0.172738	4	1	1	Ppup133960.1
GO:0006259	BP	p	DNA metabolic process	0/32	811/10157	0.17695	6	0	1
GO:0010604	BP	p	positive regulation of macromolecule metabolic process	1/32	1128/10157	0.252501	5	1	1	Ppup133960.1
GO:0048522	BP	p	positive regulation of cellular process	3/32	1921/10157	0.255066	4	3	1	Ppup060190.1, Ppup133960.1, Ppup154760.1
GO:0019438	BP	p	aromatic compound biosynthetic process	0/32	581/10157	0.258972	4	0	1
GO:0045595	BP	p	regulation of cell differentiation	0/32	573/10157	0.25904	4	0	1
GO:0018130	BP	p	heterocycle biosynthetic process	0/32	566/10157	0.259248	4	0	1
GO:0065003	BP	p	protein-containing complex assembly	0/32	600/10157	0.259519	5	0	1
GO:0051254	BP	p	positive regulation of RNA metabolic process	0/32	600/10157	0.259519	7	0	1
GO:1901362	BP	p	organic cyclic compound biosynthetic process	0/32	631/10157	0.262445	4	0	1
GO:0010557	BP	p	positive regulation of macromolecule biosynthetic process	0/32	636/10157	0.263141	6	0	1
GO:2000026	BP	p	regulation of multicellular organismal development	0/32	642/10157	0.264056	4	0	1
GO:0009059	BP	p	macromolecule biosynthetic process	0/32	648/10157	0.265055	4	0	1
GO:0045935	BP	p	positive regulation of nucleobase-containing compound metabolic process	0/32	652/10157	0.265768	6	0	1
GO:0031328	BP	p	positive regulation of cellular biosynthetic process	0/32	665/10157	0.268334	6	0	1
GO:0009891	BP	p	positive regulation of biosynthetic process	0/32	676/10157	0.270796	5	0	1
GO:0009987	BP	p	cellular process	21/32	7530/10157	0.310811	1	21	1	Ppup006550.1, Ppup008700.1, Ppup028060.1, Ppup043010.1, Ppup061580.1, Ppup063140.1, Ppup070660.1, Ppup083190.1, Ppup094310.1, Ppup096400.1, Ppup096410.1, Ppup109070.1, Ppup117110.1, Ppup124350.1, Ppup133260.1, Ppup133780.1, Ppup133960.1, Ppup139080.1, Ppup140770.1, Ppup154760.1, Ppup160680.1
GO:0051239	BP	p	regulation of multicellular organismal process	1/32	900/10157	0.359396	3	1	1	Ppup133780.1
GO:0051128	BP	p	regulation of cellular component organization	1/32	943/10157	0.359591	4	1	1	Ppup154760.1
GO:0016070	BP	p	RNA metabolic process	1/32	955/10157	0.360241	6	1	1	Ppup139080.1
GO:0051641	BP	p	cellular localization	1/32	1012/10157	0.366632	2	1	1	Ppup133960.1
GO:0006807	BP	p	nitrogen compound metabolic process	10/32	4009/10157	0.371395	2	10	1	Ppup043010.1, Ppup060190.1, Ppup061580.1, Ppup063140.1, Ppup083190.1, Ppup096400.1, Ppup096410.1, Ppup139080.1, Ppup154760.1, Ppup160680.1
GO:0051179	BP	p	localization	4/32	2048/10157	0.378228	1	4	1	Ppup006550.1, Ppup028060.1, Ppup094310.1, Ppup133960.1
GO:0048518	BP	p	positive regulation of biological process	4/32	2068/10157	0.378568	3	4	1	Ppup060190.1, Ppup133780.1, Ppup133960.1, Ppup154760.1
GO:0051247	BP	p	positive regulation of protein metabolic process	0/32	460/10157	0.401459	6	0	1
GO:0035556	BP	p	intracellular signal transduction	0/32	462/10157	0.401538	5	0	1
GO:0070647	BP	p	protein modification by small protein conjugation or removal	0/32	478/10157	0.402658	7	0	1
GO:0031399	BP	p	regulation of protein modification process	0/32	484/10157	0.403293	7	0	1
GO:1901360	BP	p	organic cyclic compound metabolic process	5/32	2317/10157	0.40396	3	5	1	Ppup043010.1, Ppup083190.1, Ppup096400.1, Ppup096410.1, Ppup139080.1
GO:0003008	BP	p	system process	0/32	491/10157	0.404178	2	0	1
GO:0034654	BP	p	nucleobase-containing compound biosynthetic process	0/32	506/10157	0.406571	5	0	1
GO:0007166	BP	p	cell surface receptor signaling pathway	0/32	515/10157	0.408319	5	0	1
GO:0034645	BP	p	cellular macromolecule biosynthetic process	0/32	534/10157	0.412731	5	0	1
GO:0045893	BP	p	positive regulation of transcription, DNA-templated	0/32	547/10157	0.41628	10	0	1
GO:1903508	BP	p	positive regulation of nucleic acid-templated transcription	0/32	549/10157	0.416862	9	0	1
GO:1902680	BP	p	positive regulation of RNA biosynthetic process	0/32	550/10157	0.417157	8	0	1
GO:2001141	BP	p	regulation of RNA biosynthetic process	2/32	1223/10157	0.421879	7	2	1	Ppup124350.1, Ppup154760.1
GO:1903506	BP	p	regulation of nucleic acid-templated transcription	2/32	1222/10157	0.421912	8	2	1	Ppup124350.1, Ppup154760.1
GO:0006355	BP	p	regulation of transcription, DNA-templated	2/32	1218/10157	0.422056	9	2	1	Ppup124350.1, Ppup154760.1
GO:0050794	BP	p	regulation of cellular process	10/32	3893/10157	0.469934	3	10	1	Ppup006060.1, Ppup006550.1, Ppup008700.1, Ppup010390.1, Ppup060190.1, Ppup124350.1, Ppup133960.1, Ppup139080.1, Ppup140770.1, Ppup154760.1
GO:0044271	BP	p	cellular nitrogen compound biosynthetic process	1/32	762/10157	0.512071	4	1	1	Ppup160680.1
GO:0032879	BP	p	regulation of localization	1/32	823/10157	0.513643	3	1	1	Ppup133960.1
GO:0006796	BP	p	phosphate-containing compound metabolic process	1/32	851/10157	0.516561	4	1	1	Ppup070660.1
GO:0006793	BP	p	phosphorus metabolic process	1/32	862/10157	0.518054	3	1	1	Ppup070660.1
GO:0006725	BP	p	cellular aromatic compound metabolic process	5/32	2229/10157	0.521591	3	5	1	Ppup043010.1, Ppup083190.1, Ppup096400.1, Ppup096410.1, Ppup139080.1
GO:0031323	BP	p	regulation of cellular metabolic process	5/32	2182/10157	0.521778	4	5	1	Ppup010390.1, Ppup124350.1, Ppup139080.1, Ppup140770.1, Ppup154760.1
GO:0006996	BP	p	organelle organization	2/32	1140/10157	0.573771	4	2	1	Ppup063140.1, Ppup133260.1
GO:2000112	BP	p	regulation of cellular macromolecule biosynthetic process	3/32	1428/10157	0.612471	6	3	1	Ppup124350.1, Ppup139080.1, Ppup154760.1
GO:0010556	BP	p	regulation of macromolecule biosynthetic process	3/32	1445/10157	0.612722	5	3	1	Ppup124350.1, Ppup139080.1, Ppup154760.1
GO:0019219	BP	p	regulation of nucleobase-containing compound metabolic process	3/32	1460/10157	0.613162	5	3	1	Ppup124350.1, Ppup139080.1, Ppup154760.1
GO:0031326	BP	p	regulation of cellular biosynthetic process	3/32	1477/10157	0.613902	5	3	1	Ppup124350.1, Ppup139080.1, Ppup154760.1
GO:0009889	BP	p	regulation of biosynthetic process	3/32	1502/10157	0.615446	4	3	1	Ppup124350.1, Ppup139080.1, Ppup154760.1
GO:0050767	BP	p	regulation of neurogenesis	0/32	316/10157	0.625677	6	0	1
GO:0034660	BP	p	ncRNA metabolic process	0/32	320/10157	0.625693	7	0	1
GO:0022603	BP	p	regulation of anatomical structure morphogenesis	0/32	312/10157	0.625723	4	0	1
GO:0007049	BP	p	cell cycle	0/32	312/10157	0.625723	2	0	1
GO:0006310	BP	p	DNA recombination	0/32	322/10157	0.625724	7	0	1
GO:0009117	BP	p	nucleotide metabolic process	0/32	323/10157	0.625745	7	0	1
GO:0006281	BP	p	DNA repair	0/32	310/10157	0.625769	7	0	1
GO:0006753	BP	p	nucleoside phosphate metabolic process	0/32	324/10157	0.62577	6	0	1
GO:0001932	BP	p	regulation of protein phosphorylation	0/32	328/10157	0.625905	8	0	1
GO:0016310	BP	p	phosphorylation	0/32	338/10157	0.626493	5	0	1
GO:0018193	BP	p	peptidyl-amino acid modification	0/32	340/10157	0.626651	7	0	1
GO:0009894	BP	p	regulation of catabolic process	0/32	347/10157	0.627311	4	0	1
GO:0016567	BP	p	protein ubiquitination	0/32	361/10157	0.62909	9	0	1
GO:0015074	BP	p	DNA integration	0/32	363/10157	0.629392	7	0	1
GO:0044087	BP	p	regulation of cellular component biogenesis	0/32	364/10157	0.629548	4	0	1
GO:0006886	BP	p	intracellular protein transport	0/32	365/10157	0.629706	8	0	1
GO:0051960	BP	p	regulation of nervous system development	0/32	366/10157	0.629867	5	0	1
GO:0007017	BP	p	microtubule-based process	0/32	367/10157	0.630031	2	0	1
GO:0007610	BP	p	behavior	0/32	369/10157	0.630367	1	0	1
GO:0060284	BP	p	regulation of cell development	0/32	372/10157	0.630891	5	0	1
GO:0042325	BP	p	regulation of phosphorylation	0/32	376/10157	0.631629	7	0	1
GO:0050877	BP	p	nervous system process	0/32	378/10157	0.632013	3	0	1
GO:0051094	BP	p	positive regulation of developmental process	0/32	382/10157	0.632813	4	0	1
GO:0040011	BP	p	locomotion	0/32	382/10157	0.632813	1	0	1
GO:0022412	BP	p	cellular process involved in reproduction in multicellular organism	0/32	386/10157	0.633653	2	0	1
GO:0045944	BP	p	positive regulation of transcription by RNA polymerase II	0/32	386/10157	0.633653	11	0	1
GO:0009628	BP	p	response to abiotic stimulus	0/32	392/10157	0.634986	2	0	1
GO:0032446	BP	p	protein modification by small protein conjugation	0/32	394/10157	0.63545	8	0	1
GO:0048468	BP	p	cell development	0/32	405/10157	0.638161	3	0	1
GO:0006974	BP	p	cellular response to DNA damage stimulus	0/32	408/10157	0.638946	4	0	1
GO:0034622	BP	p	cellular protein-containing complex assembly	0/32	413/10157	0.640297	6	0	1
GO:0006810	BP	p	transport	4/32	1745/10157	0.640451	3	4	1	Ppup006550.1, Ppup028060.1, Ppup094310.1, Ppup133960.1
GO:0051234	BP	p	establishment of localization	4/32	1804/10157	0.641949	2	4	1	Ppup006550.1, Ppup028060.1, Ppup094310.1, Ppup133960.1
GO:0019220	BP	p	regulation of phosphate metabolic process	0/32	431/10157	0.645563	6	0	1
GO:0051174	BP	p	regulation of phosphorus metabolic process	0/32	431/10157	0.645563	5	0	1
GO:0051726	BP	p	regulation of cell cycle	0/32	432/10157	0.645872	4	0	1
GO:0032270	BP	p	positive regulation of cellular protein metabolic process	0/32	434/10157	0.646498	7	0	1
GO:0051171	BP	p	regulation of nitrogen compound metabolic process	5/32	2067/10157	0.66124	4	5	1	Ppup010390.1, Ppup124350.1, Ppup139080.1, Ppup140770.1, Ppup154760.1
GO:0080090	BP	p	regulation of primary metabolic process	5/32	2125/10157	0.662573	4	5	1	Ppup010390.1, Ppup124350.1, Ppup139080.1, Ppup140770.1, Ppup154760.1
GO:0019222	BP	p	regulation of metabolic process	6/32	2426/10157	0.677763	3	6	1	Ppup010390.1, Ppup124350.1, Ppup133960.1, Ppup139080.1, Ppup140770.1, Ppup154760.1
GO:0010628	BP	p	positive regulation of gene expression	1/32	703/10157	0.723322	6	1	1	Ppup133960.1
GO:0044237	BP	p	cellular metabolic process	13/32	4525/10157	0.723721	2	13	1	Ppup006550.1, Ppup043010.1, Ppup061580.1, Ppup070660.1, Ppup083190.1, Ppup096400.1, Ppup096410.1, Ppup109070.1, Ppup117110.1, Ppup133780.1, Ppup139080.1, Ppup154760.1, Ppup160680.1
GO:0048869	BP	p	cellular developmental process	2/32	1025/10157	0.766547	2	2	1	Ppup124350.1, Ppup133960.1
GO:0023051	BP	p	regulation of signaling	2/32	1038/10157	0.76737	3	2	1	Ppup008700.1, Ppup060190.1
GO:0044249	BP	p	cellular biosynthetic process	3/32	1270/10157	0.790892	3	3	1	Ppup109070.1, Ppup133780.1, Ppup160680.1
GO:1901576	BP	p	organic substance biosynthetic process	3/32	1311/10157	0.7914	3	3	1	Ppup109070.1, Ppup133780.1, Ppup160680.1
GO:0051252	BP	p	regulation of RNA metabolic process	3/32	1360/10157	0.793233	6	3	1	Ppup124350.1, Ppup139080.1, Ppup154760.1
GO:0048856	BP	p	anatomical structure development	4/32	1581/10157	0.808773	2	4	1	Ppup063140.1, Ppup094310.1, Ppup113610.1, Ppup124350.1
GO:0032501	BP	p	multicellular organismal process	4/32	1638/10157	0.809349	1	4	1	Ppup094310.1, Ppup117110.1, Ppup142250.1, Ppup154760.1
GO:0010468	BP	p	regulation of gene expression	4/32	1677/10157	0.810543	5	4	1	Ppup124350.1, Ppup133960.1, Ppup139080.1, Ppup154760.1
GO:0032502	BP	p	developmental process	6/32	2250/10157	0.831403	1	6	1	Ppup063140.1, Ppup094310.1, Ppup113610.1, Ppup124350.1, Ppup133960.1, Ppup160680.1
GO:0060255	BP	p	regulation of macromolecule metabolic process	6/32	2261/10157	0.831516	4	6	1	Ppup010390.1, Ppup124350.1, Ppup133960.1, Ppup139080.1, Ppup140770.1, Ppup154760.1
GO:1902167	BP	p	positive regulation of intrinsic apoptotic signaling pathway in response to DNA damage by p53 class mediator	0/32	1/10157	1	11	0	1
GO:0021602	BP	p	cranial nerve morphogenesis	0/32	2/10157	1	3	0	1
GO:0071168	BP	p	protein localization to chromatin	0/32	7/10157	1	7	0	1
GO:0007406	BP	p	negative regulation of neuroblast proliferation	0/32	15/10157	1	8	0	1
GO:0055081	BP	p	anion homeostasis	0/32	20/10157	1	6	0	1
GO:1904825	BP	p	protein localization to microtubule plus-end	0/32	1/10157	1	10	0	1
GO:0000027	BP	p	ribosomal large subunit assembly	0/32	20/10157	1	8	0	1
GO:0030327	BP	p	prenylated protein catabolic process	0/32	2/10157	1	8	0	1
GO:0071442	BP	p	positive regulation of histone H3-K14 acetylation	0/32	1/10157	1	12	0	1
GO:0001746	BP	p	Bolwig's organ morphogenesis	0/32	5/10157	1	6	0	1
GO:0030579	BP	p	ubiquitin-dependent SMAD protein catabolic process	0/32	2/10157	1	9	0	1
GO:0051694	BP	p	pointed-end actin filament capping	0/32	1/10157	1	13	0	1
GO:0001919	BP	p	regulation of receptor recycling	0/32	7/10157	1	5	0	1
GO:2000181	BP	p	negative regulation of blood vessel morphogenesis	0/32	8/10157	1	7	0	1
GO:0048320	BP	p	axial mesoderm formation	0/32	1/10157	1	5	0	1
GO:0006392	BP	p	transcription elongation from mitochondrial promoter	0/32	1/10157	1	9	0	1
GO:0042063	BP	p	gliogenesis	0/32	3/10157	1	5	0	1
GO:0035190	BP	p	syncytial nuclear migration	0/32	3/10157	1	6	0	1
GO:0070291	BP	p	N-acylethanolamine metabolic process	0/32	2/10157	1	8	0	1
GO:0016237	BP	p	lysosomal microautophagy	0/32	4/10157	1	5	0	1
GO:0051931	BP	p	regulation of sensory perception	0/32	5/10157	1	6	0	1
GO:0045799	BP	p	positive regulation of chromatin assembly or disassembly	0/32	6/10157	1	9	0	1
GO:0019519	BP	p	pentitol metabolic process	0/32	1/10157	1	7	0	1
GO:1903636	BP	p	regulation of protein insertion into mitochondrial outer membrane	0/32	1/10157	1	10	0	1
GO:0031122	BP	p	cytoplasmic microtubule organization	0/32	33/10157	1	7	0	1
GO:0043113	BP	p	receptor clustering	0/32	21/10157	1	6	0	1
GO:2000206	BP	p	regulation of ribosomal small subunit export from nucleus	0/32	1/10157	1	10	0	1
GO:0042357	BP	p	thiamine diphosphate metabolic process	0/32	2/10157	1	5	0	1
GO:1901137	BP	p	carbohydrate derivative biosynthetic process	0/32	198/10157	1	4	0	1
GO:0042326	BP	p	negative regulation of phosphorylation	0/32	98/10157	1	8	0	1
GO:0000271	BP	p	polysaccharide biosynthetic process	0/32	21/10157	1	5	0	1
GO:2000143	BP	p	negative regulation of DNA-templated transcription, initiation	0/32	1/10157	1	11	0	1
GO:0071772	BP	p	response to BMP	0/32	4/10157	1	5	0	1
GO:0060770	BP	p	negative regulation of epithelial cell proliferation involved in prostate gland development	0/32	2/10157	1	7	0	1
GO:0002931	BP	p	response to ischemia	0/32	9/10157	1	3	0	1
GO:0006581	BP	p	acetylcholine catabolic process	0/32	1/10157	1	6	0	1
GO:0048214	BP	p	regulation of Golgi vesicle fusion to target membrane	0/32	1/10157	1	7	0	1
GO:1901661	BP	p	quinone metabolic process	0/32	20/10157	1	4	0	1
GO:0009057	BP	p	macromolecule catabolic process	1/32	599/10157	1	4	1	1	Ppup061580.1
GO:0032458	BP	p	slow endocytic recycling	0/32	1/10157	1	7	0	1
GO:0051865	BP	p	protein autoubiquitination	0/32	41/10157	1	10	0	1
GO:0048711	BP	p	positive regulation of astrocyte differentiation	0/32	2/10157	1	10	0	1
GO:0098742	BP	p	cell-cell adhesion via plasma-membrane adhesion molecules	0/32	66/10157	1	4	0	1
GO:0032727	BP	p	positive regulation of interferon-alpha production	0/32	2/10157	1	7	0	1
GO:0060411	BP	p	cardiac septum morphogenesis	0/32	34/10157	1	3	0	1
GO:0034394	BP	p	protein localization to cell surface	0/32	14/10157	1	5	0	1
GO:0045123	BP	p	cellular extravasation	0/32	1/10157	1	6	0	1
GO:0140077	BP	p	positive regulation of lipoprotein transport	0/32	11/10157	1	8	0	1
GO:0010715	BP	p	regulation of extracellular matrix disassembly	0/32	2/10157	1	6	0	1
GO:0030046	BP	p	parallel actin filament bundle assembly	0/32	3/10157	1	8	0	1
GO:0031668	BP	p	cellular response to extracellular stimulus	0/32	90/10157	1	4	0	1
GO:0006421	BP	p	asparaginyl-tRNA aminoacylation	0/32	3/10157	1	11	0	1
GO:0071965	BP	p	multicellular organismal locomotion	0/32	1/10157	1	3	0	1
GO:0042403	BP	p	thyroid hormone metabolic process	0/32	3/10157	1	5	0	1
GO:0061356	BP	p	regulation of Wnt protein secretion	0/32	3/10157	1	8	0	1
GO:0035153	BP	p	epithelial cell type specification, open tracheal system	0/32	3/10157	1	4	0	1
GO:0048071	BP	p	sex-specific pigmentation	0/32	4/10157	1	3	0	1
GO:1900015	BP	p	regulation of cytokine production involved in inflammatory response	0/32	8/10157	1	7	0	1
GO:1903463	BP	p	regulation of mitotic cell cycle DNA replication	0/32	3/10157	1	10	0	1
GO:0051304	BP	p	chromosome separation	0/32	10/10157	1	3	0	1
GO:0048642	BP	p	negative regulation of skeletal muscle tissue development	0/32	3/10157	1	8	0	1
GO:0033962	BP	p	cytoplasmic mRNA processing body assembly	0/32	7/10157	1	6	0	1
GO:0006298	BP	p	mismatch repair	0/32	23/10157	1	8	0	1
GO:0035191	BP	p	nuclear axial expansion	0/32	3/10157	1	7	0	1
GO:0032224	BP	p	positive regulation of synaptic transmission, cholinergic	0/32	1/10157	1	8	0	1
GO:0048550	BP	p	negative regulation of pinocytosis	0/32	1/10157	1	8	0	1
GO:0120186	BP	p	negative regulation of protein localization to chromatin	0/32	1/10157	1	7	0	1
GO:0046292	BP	p	formaldehyde metabolic process	0/32	1/10157	1	5	0	1
GO:0060421	BP	p	positive regulation of heart growth	0/32	3/10157	1	7	0	1
GO:0042274	BP	p	ribosomal small subunit biogenesis	0/32	6/10157	1	5	0	1
GO:1905289	BP	p	regulation of CAMKK-AMPK signaling cascade	0/32	1/10157	1	8	0	1
GO:2000273	BP	p	positive regulation of signaling receptor activity	0/32	4/10157	1	7	0	1
GO:0044211	BP	p	CTP salvage	0/32	2/10157	1	12	0	1
GO:0048803	BP	p	imaginal disc-derived male genitalia morphogenesis	0/32	6/10157	1	7	0	1
GO:0003414	BP	p	chondrocyte morphogenesis involved in endochondral bone morphogenesis	0/32	1/10157	1	6	0	1
GO:0098795	BP	p	mRNA cleavage involved in gene silencing	0/32	7/10157	1	9	0	1
GO:0090305	BP	p	nucleic acid phosphodiester bond hydrolysis	0/32	96/10157	1	6	0	1
GO:0003407	BP	p	neural retina development	0/32	4/10157	1	3	0	1
GO:2001039	BP	p	negative regulation of cellular response to drug	0/32	5/10157	1	6	0	1
GO:0044800	BP	p	multi-organism membrane fusion	0/32	12/10157	1	6	0	1
GO:0033233	BP	p	regulation of protein sumoylation	0/32	1/10157	1	9	0	1
GO:0071277	BP	p	cellular response to calcium ion	0/32	17/10157	1	6	0	1
GO:0046755	BP	p	viral budding	0/32	9/10157	1	4	0	1
GO:1905214	BP	p	regulation of RNA binding	0/32	6/10157	1	4	0	1
GO:0099111	BP	p	microtubule-based transport	0/32	97/10157	1	4	0	1
GO:2001038	BP	p	regulation of cellular response to drug	0/32	9/10157	1	5	0	1
GO:0002206	BP	p	gene conversion of immunoglobulin genes	0/32	1/10157	1	10	0	1
GO:0015729	BP	p	oxaloacetate transport	0/32	2/10157	1	10	0	1
GO:0000294	BP	p	nuclear-transcribed mRNA catabolic process, endonucleolytic cleavage-dependent decay	0/32	1/10157	1	10	0	1
GO:0022411	BP	p	cellular component disassembly	0/32	114/10157	1	4	0	1
GO:0045571	BP	p	negative regulation of imaginal disc growth	0/32	7/10157	1	7	0	1
GO:0033194	BP	p	response to hydroperoxide	0/32	3/10157	1	4	0	1
GO:0046320	BP	p	regulation of fatty acid oxidation	0/32	7/10157	1	7	0	1
GO:0030447	BP	p	filamentous growth	0/32	1/10157	1	2	0	1
GO:0006844	BP	p	acyl carnitine transport	0/32	3/10157	1	8	0	1
GO:0071887	BP	p	leukocyte apoptotic process	0/32	1/10157	1	5	0	1
GO:0000335	BP	p	negative regulation of transposition, DNA-mediated	0/32	1/10157	1	9	0	1
GO:0007041	BP	p	lysosomal transport	0/32	51/10157	1	5	0	1
GO:0002768	BP	p	immune response-regulating cell surface receptor signaling pathway	0/32	41/10157	1	6	0	1
GO:0007488	BP	p	histoblast morphogenesis	0/32	3/10157	1	7	0	1
GO:0070570	BP	p	regulation of neuron projection regeneration	0/32	9/10157	1	9	0	1
GO:0033260	BP	p	nuclear DNA replication	0/32	8/10157	1	9	0	1
GO:0002036	BP	p	regulation of L-glutamate import across plasma membrane	0/32	1/10157	1	10	0	1
GO:0045124	BP	p	regulation of bone resorption	0/32	5/10157	1	6	0	1
GO:1903039	BP	p	positive regulation of leukocyte cell-cell adhesion	0/32	19/10157	1	7	0	1
GO:0035247	BP	p	peptidyl-arginine omega-N-methylation	0/32	5/10157	1	11	0	1
GO:0045932	BP	p	negative regulation of muscle contraction	0/32	2/10157	1	7	0	1
GO:0032098	BP	p	regulation of appetite	0/32	9/10157	1	3	0	1
GO:0045747	BP	p	positive regulation of Notch signaling pathway	0/32	13/10157	1	7	0	1
GO:0009436	BP	p	glyoxylate catabolic process	0/32	3/10157	1	8	0	1
GO:1903677	BP	p	regulation of cap-independent translational initiation	0/32	2/10157	1	10	0	1
GO:0032275	BP	p	luteinizing hormone secretion	0/32	1/10157	1	10	0	1
GO:0045677	BP	p	negative regulation of R7 cell differentiation	0/32	1/10157	1	11	0	1
GO:0010037	BP	p	response to carbon dioxide	0/32	6/10157	1	5	0	1
GO:0032351	BP	p	negative regulation of hormone metabolic process	0/32	1/10157	1	5	0	1
GO:2001294	BP	p	malonyl-CoA catabolic process	0/32	1/10157	1	12	0	1
GO:0016121	BP	p	carotene catabolic process	0/32	1/10157	1	8	0	1
GO:0031077	BP	p	post-embryonic camera-type eye development	0/32	1/10157	1	7	0	1
GO:0010595	BP	p	positive regulation of endothelial cell migration	0/32	6/10157	1	9	0	1
GO:0006569	BP	p	tryptophan catabolic process	0/32	4/10157	1	9	0	1
GO:0036510	BP	p	trimming of terminal mannose on C branch	0/32	1/10157	1	11	0	1
GO:1904568	BP	p	cellular response to wortmannin	0/32	1/10157	1	6	0	1
GO:1901879	BP	p	regulation of protein depolymerization	0/32	27/10157	1	6	0	1
GO:0009583	BP	p	detection of light stimulus	0/32	41/10157	1	5	0	1
GO:0090673	BP	p	endothelial cell-matrix adhesion	0/32	1/10157	1	5	0	1
GO:0060233	BP	p	oenocyte delamination	0/32	1/10157	1	8	0	1
GO:0038066	BP	p	p38MAPK cascade	0/32	3/10157	1	11	0	1
GO:0009261	BP	p	ribonucleotide catabolic process	0/32	14/10157	1	9	0	1
GO:0044550	BP	p	secondary metabolite biosynthetic process	0/32	37/10157	1	3	0	1
GO:0051932	BP	p	synaptic transmission, GABAergic	0/32	2/10157	1	8	0	1
GO:1905448	BP	p	positive regulation of mitochondrial ATP synthesis coupled electron transport	0/32	1/10157	1	10	0	1
GO:0006733	BP	p	oxidoreduction coenzyme metabolic process	0/32	23/10157	1	5	0	1
GO:0002886	BP	p	regulation of myeloid leukocyte mediated immunity	0/32	7/10157	1	6	0	1
GO:0071417	BP	p	cellular response to organonitrogen compound	0/32	96/10157	1	5	0	1
GO:0032307	BP	p	negative regulation of prostaglandin secretion	0/32	1/10157	1	10	0	1
GO:0050862	BP	p	positive regulation of T cell receptor signaling pathway	0/32	1/10157	1	8	0	1
GO:0010832	BP	p	negative regulation of myotube differentiation	0/32	2/10157	1	8	0	1
GO:0048160	BP	p	primary follicle stage	0/32	1/10157	1	4	0	1
GO:0007530	BP	p	sex determination	0/32	23/10157	1	3	0	1
GO:0046672	BP	p	positive regulation of compound eye retinal cell programmed cell death	0/32	4/10157	1	8	0	1
GO:0015786	BP	p	UDP-glucose transmembrane transport	0/32	3/10157	1	8	0	1
GO:0006424	BP	p	glutamyl-tRNA aminoacylation	0/32	2/10157	1	11	0	1
GO:0007113	BP	p	endomitotic cell cycle	0/32	1/10157	1	4	0	1
GO:0031914	BP	p	negative regulation of synaptic plasticity	0/32	1/10157	1	8	0	1
GO:0071593	BP	p	lymphocyte aggregation	0/32	1/10157	1	6	0	1
GO:0014834	BP	p	skeletal muscle satellite cell maintenance involved in skeletal muscle regeneration	0/32	1/10157	1	3	0	1
GO:0015880	BP	p	coenzyme A transport	0/32	1/10157	1	9	0	1
GO:0014048	BP	p	regulation of glutamate secretion	0/32	5/10157	1	8	0	1
GO:0046174	BP	p	polyol catabolic process	0/32	15/10157	1	6	0	1
GO:0140056	BP	p	organelle localization by membrane tethering	0/32	52/10157	1	4	0	1
GO:0015891	BP	p	siderophore transport	0/32	2/10157	1	10	0	1
GO:0034184	BP	p	positive regulation of maintenance of mitotic sister chromatid cohesion	0/32	2/10157	1	11	0	1
GO:0014896	BP	p	muscle hypertrophy	0/32	3/10157	1	4	0	1
GO:0006050	BP	p	mannosamine metabolic process	0/32	1/10157	1	5	0	1
GO:0001822	BP	p	kidney development	0/32	34/10157	1	4	0	1
GO:1903726	BP	p	negative regulation of phospholipid metabolic process	0/32	1/10157	1	8	0	1
GO:0032370	BP	p	positive regulation of lipid transport	0/32	18/10157	1	6	0	1
GO:0007257	BP	p	activation of JUN kinase activity	0/32	7/10157	1	14	0	1
GO:0006106	BP	p	fumarate metabolic process	0/32	3/10157	1	7	0	1
GO:0030903	BP	p	notochord development	0/32	1/10157	1	5	0	1
GO:0009068	BP	p	aspartate family amino acid catabolic process	0/32	13/10157	1	9	0	1
GO:1904688	BP	p	regulation of cytoplasmic translational initiation	0/32	2/10157	1	9	0	1
GO:0043519	BP	p	regulation of myosin II filament organization	0/32	5/10157	1	8	0	1
GO:0048209	BP	p	regulation of vesicle targeting, to, from or within Golgi	0/32	3/10157	1	6	0	1
GO:0070527	BP	p	platelet aggregation	0/32	2/10157	1	5	0	1
GO:0090089	BP	p	regulation of dipeptide transport	0/32	1/10157	1	7	0	1
GO:0034374	BP	p	low-density lipoprotein particle remodeling	0/32	6/10157	1	8	0	1
GO:0007018	BP	p	microtubule-based movement	0/32	158/10157	1	3	0	1
GO:0008356	BP	p	asymmetric cell division	0/32	41/10157	1	3	0	1
GO:0050779	BP	p	RNA destabilization	0/32	13/10157	1	8	0	1
GO:0034287	BP	p	detection of monosaccharide stimulus	0/32	1/10157	1	6	0	1
GO:0006616	BP	p	SRP-dependent cotranslational protein targeting to membrane, translocation	0/32	6/10157	1	10	0	1
GO:0021556	BP	p	central nervous system formation	0/32	4/10157	1	3	0	1
GO:1900175	BP	p	regulation of nodal signaling pathway involved in determination of lateral mesoderm left/right asymmetry	0/32	1/10157	1	12	0	1
GO:0071951	BP	p	conversion of methionyl-tRNA to N-formyl-methionyl-tRNA	0/32	1/10157	1	12	0	1
GO:2000797	BP	p	regulation of amniotic stem cell differentiation	0/32	1/10157	1	7	0	1
GO:0032344	BP	p	regulation of aldosterone metabolic process	0/32	1/10157	1	7	0	1
GO:0006843	BP	p	mitochondrial citrate transmembrane transport	0/32	1/10157	1	11	0	1
GO:0017186	BP	p	peptidyl-pyroglutamic acid biosynthetic process, using glutaminyl-peptide cyclotransferase	0/32	1/10157	1	9	0	1
GO:0035581	BP	p	sequestering of extracellular ligand from receptor	0/32	1/10157	1	8	0	1
GO:1901653	BP	p	cellular response to peptide	0/32	53/10157	1	6	0	1
GO:1904994	BP	p	regulation of leukocyte adhesion to vascular endothelial cell	0/32	2/10157	1	7	0	1
GO:1903839	BP	p	positive regulation of mRNA 3'-UTR binding	0/32	4/10157	1	7	0	1
GO:0070537	BP	p	histone H2A K63-linked deubiquitination	0/32	1/10157	1	11	0	1
GO:0033003	BP	p	regulation of mast cell activation	0/32	6/10157	1	6	0	1
GO:0001944	BP	p	vasculature development	0/32	8/10157	1	4	0	1
GO:0090312	BP	p	positive regulation of protein deacetylation	0/32	4/10157	1	9	0	1
GO:0045669	BP	p	positive regulation of osteoblast differentiation	0/32	14/10157	1	6	0	1
GO:0019694	BP	p	alkanesulfonate metabolic process	0/32	4/10157	1	4	0	1
GO:0030047	BP	p	actin modification	0/32	3/10157	1	7	0	1
GO:0019988	BP	p	charged-tRNA amino acid modification	0/32	1/10157	1	11	0	1
GO:0021615	BP	p	glossopharyngeal nerve morphogenesis	0/32	2/10157	1	4	0	1
GO:0002573	BP	p	myeloid leukocyte differentiation	0/32	14/10157	1	5	0	1
GO:0051591	BP	p	response to cAMP	0/32	21/10157	1	6	0	1
GO:0032368	BP	p	regulation of lipid transport	0/32	26/10157	1	5	0	1
GO:0050848	BP	p	regulation of calcium-mediated signaling	0/32	21/10157	1	7	0	1
GO:0043030	BP	p	regulation of macrophage activation	0/32	3/10157	1	6	0	1
GO:0015783	BP	p	GDP-fucose transmembrane transport	0/32	2/10157	1	8	0	1
GO:1904646	BP	p	cellular response to amyloid-beta	0/32	2/10157	1	7	0	1
GO:0006478	BP	p	peptidyl-tyrosine sulfation	0/32	1/10157	1	9	0	1
GO:0010982	BP	p	regulation of high-density lipoprotein particle clearance	0/32	1/10157	1	5	0	1
GO:1904580	BP	p	regulation of intracellular mRNA localization	0/32	11/10157	1	5	0	1
GO:0006393	BP	p	termination of mitochondrial transcription	0/32	1/10157	1	9	0	1
GO:0045627	BP	p	positive regulation of T-helper 1 cell differentiation	0/32	2/10157	1	13	0	1
GO:0070783	BP	p	growth of unicellular organism as a thread of attached cells	0/32	1/10157	1	4	0	1
GO:0010499	BP	p	proteasomal ubiquitin-independent protein catabolic process	0/32	20/10157	1	8	0	1
GO:0007299	BP	p	ovarian follicle cell-cell adhesion	0/32	2/10157	1	5	0	1
GO:0003015	BP	p	heart process	0/32	12/10157	1	4	0	1
GO:2000774	BP	p	positive regulation of cellular senescence	0/32	2/10157	1	7	0	1
GO:1902023	BP	p	L-arginine transport	0/32	2/10157	1	11	0	1
GO:0009182	BP	p	purine deoxyribonucleoside diphosphate metabolic process	0/32	3/10157	1	9	0	1
GO:0006537	BP	p	glutamate biosynthetic process	0/32	4/10157	1	10	0	1
GO:0060587	BP	p	regulation of lipoprotein lipid oxidation	0/32	4/10157	1	8	0	1
GO:0032366	BP	p	intracellular sterol transport	0/32	19/10157	1	7	0	1
GO:1902905	BP	p	positive regulation of supramolecular fiber organization	0/32	54/10157	1	6	0	1
GO:0007288	BP	p	sperm axoneme assembly	0/32	10/10157	1	9	0	1
GO:0051014	BP	p	actin filament severing	0/32	3/10157	1	3	0	1
GO:0055067	BP	p	monovalent inorganic cation homeostasis	0/32	34/10157	1	7	0	1
GO:0032012	BP	p	regulation of ARF protein signal transduction	0/32	8/10157	1	9	0	1
GO:0036323	BP	p	vascular endothelial growth factor receptor-1 signaling pathway	0/32	1/10157	1	9	0	1
GO:1901339	BP	p	regulation of store-operated calcium channel activity	0/32	6/10157	1	10	0	1
GO:0070262	BP	p	peptidyl-serine dephosphorylation	0/32	3/10157	1	8	0	1
GO:0061738	BP	p	late endosomal microautophagy	0/32	1/10157	1	5	0	1
GO:1905508	BP	p	protein localization to microtubule organizing center	0/32	6/10157	1	8	0	1
GO:0042491	BP	p	inner ear auditory receptor cell differentiation	0/32	3/10157	1	7	0	1
GO:1903301	BP	p	positive regulation of hexokinase activity	0/32	1/10157	1	10	0	1
GO:0010826	BP	p	negative regulation of centrosome duplication	0/32	6/10157	1	10	0	1
GO:0046457	BP	p	prostanoid biosynthetic process	0/32	5/10157	1	10	0	1
GO:0002183	BP	p	cytoplasmic translational initiation	0/32	5/10157	1	4	0	1
GO:0045071	BP	p	negative regulation of viral genome replication	0/32	11/10157	1	7	0	1
GO:0002011	BP	p	morphogenesis of an epithelial sheet	0/32	7/10157	1	5	0	1
GO:0070372	BP	p	regulation of ERK1 and ERK2 cascade	0/32	37/10157	1	10	0	1
GO:0045646	BP	p	regulation of erythrocyte differentiation	0/32	8/10157	1	7	0	1
GO:0033967	BP	p	box C/D snoRNA metabolic process	0/32	1/10157	1	9	0	1
GO:0019483	BP	p	beta-alanine biosynthetic process	0/32	4/10157	1	8	0	1
GO:0051972	BP	p	regulation of telomerase activity	0/32	12/10157	1	8	0	1
GO:1901739	BP	p	regulation of myoblast fusion	0/32	9/10157	1	8	0	1
GO:0002803	BP	p	positive regulation of antibacterial peptide production	0/32	15/10157	1	9	0	1
GO:0010845	BP	p	positive regulation of reciprocal meiotic recombination	0/32	1/10157	1	10	0	1
GO:0072015	BP	p	glomerular visceral epithelial cell development	0/32	5/10157	1	6	0	1
GO:0019051	BP	p	induction by virus of host apoptotic process	0/32	1/10157	1	12	0	1
GO:0035126	BP	p	post-embryonic genitalia morphogenesis	0/32	6/10157	1	5	0	1
GO:0007539	BP	p	primary sex determination, soma	0/32	1/10157	1	5	0	1
GO:0007111	BP	p	meiosis II cytokinesis	0/32	3/10157	1	6	0	1
GO:0045091	BP	p	regulation of single stranded viral RNA replication via double stranded DNA intermediate	0/32	1/10157	1	7	0	1
GO:0090260	BP	p	negative regulation of retinal ganglion cell axon guidance	0/32	1/10157	1	12	0	1
GO:0010893	BP	p	positive regulation of steroid biosynthetic process	0/32	9/10157	1	8	0	1
GO:0051695	BP	p	actin filament uncapping	0/32	1/10157	1	12	0	1
GO:0031648	BP	p	protein destabilization	0/32	32/10157	1	4	0	1
GO:0010001	BP	p	glial cell differentiation	0/32	19/10157	1	4	0	1
GO:0019477	BP	p	L-lysine catabolic process	0/32	4/10157	1	11	0	1
GO:0060828	BP	p	regulation of canonical Wnt signaling pathway	0/32	82/10157	1	7	0	1
GO:0051154	BP	p	negative regulation of striated muscle cell differentiation	0/32	9/10157	1	7	0	1
GO:2000127	BP	p	positive regulation of octopamine or tyramine signaling pathway	0/32	1/10157	1	8	0	1
GO:0008039	BP	p	synaptic target recognition	0/32	19/10157	1	4	0	1
GO:0038180	BP	p	nerve growth factor signaling pathway	0/32	1/10157	1	7	0	1
GO:0010745	BP	p	negative regulation of macrophage derived foam cell differentiation	0/32	6/10157	1	6	0	1
GO:0001661	BP	p	conditioned taste aversion	0/32	4/10157	1	8	0	1
GO:0001894	BP	p	tissue homeostasis	0/32	49/10157	1	5	0	1
GO:0040016	BP	p	embryonic cleavage	0/32	4/10157	1	3	0	1
GO:0060536	BP	p	cartilage morphogenesis	0/32	3/10157	1	4	0	1
GO:0019050	BP	p	suppression by virus of host apoptotic process	0/32	1/10157	1	11	0	1
GO:0046080	BP	p	dUTP metabolic process	0/32	1/10157	1	11	0	1
GO:0021772	BP	p	olfactory bulb development	0/32	4/10157	1	3	0	1
GO:0048871	BP	p	multicellular organismal homeostasis	0/32	25/10157	1	4	0	1
GO:0050774	BP	p	negative regulation of dendrite morphogenesis	0/32	5/10157	1	11	0	1
GO:0045880	BP	p	positive regulation of smoothened signaling pathway	0/32	20/10157	1	7	0	1
GO:1903599	BP	p	positive regulation of autophagy of mitochondrion	0/32	4/10157	1	8	0	1
GO:0045596	BP	p	negative regulation of cell differentiation	0/32	179/10157	1	5	0	1
GO:0001946	BP	p	lymphangiogenesis	0/32	3/10157	1	3	0	1
GO:0030032	BP	p	lamellipodium assembly	0/32	10/10157	1	7	0	1
GO:0090335	BP	p	regulation of brown fat cell differentiation	0/32	1/10157	1	6	0	1
GO:0035584	BP	p	calcium-mediated signaling using intracellular calcium source	0/32	3/10157	1	8	0	1
GO:0001172	BP	p	transcription, RNA-templated	0/32	1/10157	1	9	0	1
GO:0001192	BP	p	maintenance of transcriptional fidelity during DNA-templated transcription elongation	0/32	1/10157	1	8	0	1
GO:2000567	BP	p	regulation of memory T cell activation	0/32	1/10157	1	8	0	1
GO:0034551	BP	p	mitochondrial respiratory chain complex III assembly	0/32	5/10157	1	9	0	1
GO:0038004	BP	p	epidermal growth factor receptor ligand maturation	0/32	3/10157	1	9	0	1
GO:0032836	BP	p	glomerular basement membrane development	0/32	5/10157	1	6	0	1
GO:0046102	BP	p	inosine metabolic process	0/32	4/10157	1	9	0	1
GO:1902850	BP	p	microtubule cytoskeleton organization involved in mitosis	0/32	79/10157	1	7	0	1
GO:2001236	BP	p	regulation of extrinsic apoptotic signaling pathway	0/32	30/10157	1	8	0	1
GO:0007512	BP	p	adult heart development	0/32	3/10157	1	5	0	1
GO:0061213	BP	p	positive regulation of mesonephros development	0/32	3/10157	1	7	0	1
GO:0043467	BP	p	regulation of generation of precursor metabolites and energy	0/32	46/10157	1	5	0	1
GO:0030223	BP	p	neutrophil differentiation	0/32	4/10157	1	7	0	1
GO:0043096	BP	p	purine nucleobase salvage	0/32	2/10157	1	9	0	1
GO:0043012	BP	p	regulation of fusion of sperm to egg plasma membrane	0/32	1/10157	1	5	0	1
GO:0014912	BP	p	negative regulation of smooth muscle cell migration	0/32	2/10157	1	8	0	1
GO:0070781	BP	p	response to biotin	0/32	1/10157	1	7	0	1
GO:0048332	BP	p	mesoderm morphogenesis	0/32	2/10157	1	4	0	1
GO:0072684	BP	p	mitochondrial tRNA 3'-trailer cleavage, endonucleolytic	0/32	1/10157	1	11	0	1
GO:1902623	BP	p	negative regulation of neutrophil migration	0/32	1/10157	1	9	0	1
GO:0072531	BP	p	pyrimidine-containing compound transmembrane transport	0/32	1/10157	1	5	0	1
GO:0060212	BP	p	negative regulation of nuclear-transcribed mRNA poly(A) tail shortening	0/32	1/10157	1	11	0	1
GO:0001775	BP	p	cell activation	0/32	110/10157	1	2	0	1
GO:0006044	BP	p	N-acetylglucosamine metabolic process	0/32	7/10157	1	6	0	1
GO:1905651	BP	p	regulation of artery morphogenesis	0/32	1/10157	1	6	0	1
GO:0090403	BP	p	oxidative stress-induced premature senescence	0/32	1/10157	1	6	0	1
GO:0018283	BP	p	iron incorporation into metallo-sulfur cluster	0/32	1/10157	1	8	0	1
GO:0034037	BP	p	purine ribonucleoside bisphosphate catabolic process	0/32	1/10157	1	10	0	1
GO:0061371	BP	p	determination of heart left/right asymmetry	0/32	4/10157	1	6	0	1
GO:0045616	BP	p	regulation of keratinocyte differentiation	0/32	2/10157	1	7	0	1
GO:0018009	BP	p	N-terminal peptidyl-L-cysteine N-palmitoylation	0/32	1/10157	1	10	0	1
GO:0031106	BP	p	septin ring organization	0/32	2/10157	1	7	0	1
GO:0003260	BP	p	cardioblast migration	0/32	1/10157	1	7	0	1
GO:1990443	BP	p	peptidyl-threonine autophosphorylation	0/32	2/10157	1	10	0	1
GO:0030038	BP	p	contractile actin filament bundle assembly	0/32	5/10157	1	8	0	1
GO:0032042	BP	p	mitochondrial DNA metabolic process	0/32	3/10157	1	7	0	1
GO:0007095	BP	p	mitotic G2 DNA damage checkpoint	0/32	8/10157	1	11	0	1
GO:0006490	BP	p	oligosaccharide-lipid intermediate biosynthetic process	0/32	8/10157	1	5	0	1
GO:0002757	BP	p	immune response-activating signal transduction	0/32	39/10157	1	7	0	1
GO:0008582	BP	p	regulation of synaptic growth at neuromuscular junction	0/32	41/10157	1	7	0	1
GO:0031585	BP	p	regulation of inositol 1,4,5-trisphosphate-sensitive calcium-release channel activity	0/32	2/10157	1	10	0	1
GO:0048687	BP	p	positive regulation of sprouting of injured axon	0/32	3/10157	1	12	0	1
GO:1902946	BP	p	protein localization to early endosome	0/32	2/10157	1	7	0	1
GO:0014887	BP	p	cardiac muscle adaptation	0/32	2/10157	1	6	0	1
GO:0030851	BP	p	granulocyte differentiation	0/32	7/10157	1	6	0	1
GO:1904659	BP	p	glucose transmembrane transport	0/32	4/10157	1	9	0	1
GO:0007491	BP	p	sternite morphogenesis	0/32	1/10157	1	4	0	1
GO:0010717	BP	p	regulation of epithelial to mesenchymal transition	0/32	4/10157	1	5	0	1
GO:0061436	BP	p	establishment of skin barrier	0/32	2/10157	1	8	0	1
GO:0060092	BP	p	regulation of synaptic transmission, glycinergic	0/32	1/10157	1	7	0	1
GO:0021817	BP	p	nucleokinesis involved in cell motility in cerebral cortex radial glia guided migration	0/32	2/10157	1	9	0	1
GO:0002694	BP	p	regulation of leukocyte activation	0/32	68/10157	1	5	0	1
GO:0030710	BP	p	regulation of border follicle cell delamination	0/32	1/10157	1	7	0	1
GO:0061052	BP	p	negative regulation of cell growth involved in cardiac muscle cell development	0/32	3/10157	1	10	0	1
GO:0034757	BP	p	negative regulation of iron ion transport	0/32	1/10157	1	8	0	1
GO:0003283	BP	p	atrial septum development	0/32	7/10157	1	4	0	1
GO:2000778	BP	p	positive regulation of interleukin-6 secretion	0/32	2/10157	1	10	0	1
GO:0050857	BP	p	positive regulation of antigen receptor-mediated signaling pathway	0/32	1/10157	1	7	0	1
GO:0051917	BP	p	regulation of fibrinolysis	0/32	4/10157	1	8	0	1
GO:0032350	BP	p	regulation of hormone metabolic process	0/32	8/10157	1	4	0	1
GO:0031534	BP	p	minus-end directed microtubule sliding	0/32	1/10157	1	5	0	1
GO:0032401	BP	p	establishment of melanosome localization	0/32	10/10157	1	7	0	1
GO:0070874	BP	p	negative regulation of glycogen metabolic process	0/32	1/10157	1	9	0	1
GO:0010566	BP	p	regulation of ketone biosynthetic process	0/32	6/10157	1	6	0	1
GO:0042574	BP	p	retinal metabolic process	0/32	5/10157	1	9	0	1
GO:0002720	BP	p	positive regulation of cytokine production involved in immune response	0/32	4/10157	1	7	0	1
GO:0006370	BP	p	7-methylguanosine mRNA capping	0/32	7/10157	1	10	0	1
GO:0036005	BP	p	response to macrophage colony-stimulating factor	0/32	1/10157	1	5	0	1
GO:0034143	BP	p	regulation of toll-like receptor 4 signaling pathway	0/32	1/10157	1	8	0	1
GO:0090364	BP	p	regulation of proteasome assembly	0/32	2/10157	1	6	0	1
GO:0099075	BP	p	mitochondrion-derived vesicle mediated transport	0/32	1/10157	1	5	0	1
GO:0031508	BP	p	pericentric heterochromatin assembly	0/32	2/10157	1	8	0	1
GO:0045500	BP	p	sevenless signaling pathway	0/32	9/10157	1	8	0	1
GO:1904353	BP	p	regulation of telomere capping	0/32	10/10157	1	8	0	1
GO:1902311	BP	p	regulation of copper ion transmembrane transport	0/32	1/10157	1	8	0	1
GO:1901800	BP	p	positive regulation of proteasomal protein catabolic process	0/32	48/10157	1	10	0	1
GO:1903358	BP	p	regulation of Golgi organization	0/32	5/10157	1	6	0	1
GO:0090656	BP	p	t-circle formation	0/32	2/10157	1	8	0	1
GO:0000147	BP	p	actin cortical patch assembly	0/32	1/10157	1	8	0	1
GO:1905953	BP	p	negative regulation of lipid localization	0/32	16/10157	1	5	0	1
GO:0061623	BP	p	glycolytic process from galactose	0/32	1/10157	1	16	0	1
GO:0019343	BP	p	cysteine biosynthetic process via cystathionine	0/32	3/10157	1	11	0	1
GO:1904058	BP	p	positive regulation of sensory perception of pain	0/32	3/10157	1	8	0	1
GO:1901203	BP	p	positive regulation of extracellular matrix assembly	0/32	1/10157	1	7	0	1
GO:0050878	BP	p	regulation of body fluid levels	0/32	61/10157	1	3	0	1
GO:1901070	BP	p	guanosine-containing compound biosynthetic process	0/32	7/10157	1	10	0	1
GO:0045604	BP	p	regulation of epidermal cell differentiation	0/32	3/10157	1	6	0	1
GO:0060393	BP	p	regulation of pathway-restricted SMAD protein phosphorylation	0/32	7/10157	1	9	0	1
GO:0021682	BP	p	nerve maturation	0/32	5/10157	1	4	0	1
GO:0045815	BP	p	positive regulation of gene expression, epigenetic	0/32	27/10157	1	7	0	1
GO:0045926	BP	p	negative regulation of growth	0/32	83/10157	1	4	0	1
GO:0051444	BP	p	negative regulation of ubiquitin-protein transferase activity	0/32	4/10157	1	11	0	1
GO:0034982	BP	p	mitochondrial protein processing	0/32	9/10157	1	7	0	1
GO:0071447	BP	p	cellular response to hydroperoxide	0/32	2/10157	1	6	0	1
GO:0034369	BP	p	plasma lipoprotein particle remodeling	0/32	13/10157	1	7	0	1
GO:0009167	BP	p	purine ribonucleoside monophosphate metabolic process	0/32	22/10157	1	9	0	1
GO:0016573	BP	p	histone acetylation	0/32	80/10157	1	11	0	1
GO:0002029	BP	p	desensitization of G protein-coupled receptor signaling pathway	0/32	2/10157	1	8	0	1
GO:0019640	BP	p	glucuronate catabolic process to xylulose 5-phosphate	0/32	2/10157	1	10	0	1
GO:1901018	BP	p	positive regulation of potassium ion transmembrane transporter activity	0/32	11/10157	1	10	0	1
GO:0002292	BP	p	T cell differentiation involved in immune response	0/32	3/10157	1	7	0	1
GO:0110076	BP	p	negative regulation of ferroptosis	0/32	2/10157	1	7	0	1
GO:0010265	BP	p	SCF complex assembly	0/32	1/10157	1	6	0	1
GO:0016094	BP	p	polyprenol biosynthetic process	0/32	4/10157	1	7	0	1
GO:0045667	BP	p	regulation of osteoblast differentiation	0/32	24/10157	1	5	0	1
GO:0006885	BP	p	regulation of pH	0/32	25/10157	1	8	0	1
GO:1905653	BP	p	positive regulation of artery morphogenesis	0/32	1/10157	1	7	0	1
GO:1903046	BP	p	meiotic cell cycle process	0/32	104/10157	1	3	0	1
GO:0099547	BP	p	regulation of translation at synapse, modulating synaptic transmission	0/32	1/10157	1	9	0	1
GO:0090103	BP	p	cochlea morphogenesis	0/32	2/10157	1	4	0	1
GO:0030026	BP	p	cellular manganese ion homeostasis	0/32	1/10157	1	10	0	1
GO:0035562	BP	p	negative regulation of chromatin binding	0/32	4/10157	1	5	0	1
GO:1903351	BP	p	cellular response to dopamine	0/32	3/10157	1	8	0	1
GO:0031330	BP	p	negative regulation of cellular catabolic process	0/32	79/10157	1	6	0	1
GO:0050996	BP	p	positive regulation of lipid catabolic process	0/32	7/10157	1	7	0	1
GO:0090331	BP	p	negative regulation of platelet aggregation	0/32	4/10157	1	10	0	1
GO:1903688	BP	p	positive regulation of border follicle cell migration	0/32	13/10157	1	9	0	1
GO:0035079	BP	p	polytene chromosome puffing	0/32	1/10157	1	6	0	1
GO:0098822	BP	p	peptidyl-cysteine modification to L-cysteine persulfide	0/32	1/10157	1	9	0	1
GO:0001655	BP	p	urogenital system development	0/32	2/10157	1	4	0	1
GO:0046680	BP	p	response to DDT	0/32	6/10157	1	5	0	1
GO:0070757	BP	p	interleukin-35-mediated signaling pathway	0/32	1/10157	1	7	0	1
GO:2000880	BP	p	positive regulation of dipeptide transport	0/32	1/10157	1	8	0	1
GO:1904628	BP	p	cellular response to phorbol 13-acetate 12-myristate	0/32	2/10157	1	6	0	1
GO:0033320	BP	p	UDP-D-xylose biosynthetic process	0/32	1/10157	1	8	0	1
GO:0071244	BP	p	cellular response to carbon dioxide	0/32	1/10157	1	6	0	1
GO:0071459	BP	p	protein localization to chromosome, centromeric region	0/32	15/10157	1	7	0	1
GO:0032924	BP	p	activin receptor signaling pathway	0/32	6/10157	1	8	0	1
GO:0015969	BP	p	guanosine tetraphosphate metabolic process	0/32	80/10157	1	10	0	1
GO:0071453	BP	p	cellular response to oxygen levels	0/32	35/10157	1	4	0	1
GO:0072755	BP	p	cellular response to benomyl	0/32	1/10157	1	6	0	1
GO:0046462	BP	p	monoacylglycerol metabolic process	0/32	3/10157	1	7	0	1
GO:0050428	BP	p	3'-phosphoadenosine 5'-phosphosulfate biosynthetic process	0/32	1/10157	1	11	0	1
GO:0042475	BP	p	odontogenesis of dentin-containing tooth	0/32	10/10157	1	5	0	1
GO:0009257	BP	p	10-formyltetrahydrofolate biosynthetic process	0/32	1/10157	1	9	0	1
GO:0033120	BP	p	positive regulation of RNA splicing	0/32	15/10157	1	8	0	1
GO:0009860	BP	p	pollen tube growth	0/32	2/10157	1	6	0	1
GO:0072034	BP	p	renal vesicle induction	0/32	1/10157	1	7	0	1
GO:0003013	BP	p	circulatory system process	0/32	38/10157	1	3	0	1
GO:2000632	BP	p	negative regulation of pre-miRNA processing	0/32	1/10157	1	11	0	1
GO:0009113	BP	p	purine nucleobase biosynthetic process	0/32	7/10157	1	8	0	1
GO:0034034	BP	p	purine nucleoside bisphosphate catabolic process	0/32	2/10157	1	9	0	1
GO:0007599	BP	p	hemostasis	0/32	23/10157	1	4	0	1
GO:0010770	BP	p	positive regulation of cell morphogenesis involved in differentiation	0/32	44/10157	1	7	0	1
GO:0030490	BP	p	maturation of SSU-rRNA	0/32	28/10157	1	10	0	1
GO:0006524	BP	p	alanine catabolic process	0/32	5/10157	1	10	0	1
GO:0007156	BP	p	homophilic cell adhesion via plasma membrane adhesion molecules	0/32	53/10157	1	5	0	1
GO:1903056	BP	p	regulation of melanosome organization	0/32	1/10157	1	6	0	1
GO:0018076	BP	p	N-terminal peptidyl-lysine acetylation	0/32	3/10157	1	10	0	1
GO:0048168	BP	p	regulation of neuronal synaptic plasticity	0/32	25/10157	1	8	0	1
GO:0043496	BP	p	regulation of protein homodimerization activity	0/32	4/10157	1	5	0	1
GO:0032970	BP	p	regulation of actin filament-based process	0/32	122/10157	1	4	0	1
GO:0048148	BP	p	behavioral response to cocaine	0/32	7/10157	1	3	0	1
GO:0016189	BP	p	synaptic vesicle to endosome fusion	0/32	1/10157	1	6	0	1
GO:1903925	BP	p	response to bisphenol A	0/32	2/10157	1	5	0	1
GO:0072383	BP	p	plus-end-directed vesicle transport along microtubule	0/32	7/10157	1	9	0	1
GO:0007007	BP	p	inner mitochondrial membrane organization	0/32	16/10157	1	7	0	1
GO:0043949	BP	p	regulation of cAMP-mediated signaling	0/32	10/10157	1	7	0	1
GO:0061512	BP	p	protein localization to cilium	0/32	19/10157	1	6	0	1
GO:1905489	BP	p	regulation of sensory neuron axon guidance	0/32	6/10157	1	11	0	1
GO:0031291	BP	p	Ran protein signal transduction	0/32	7/10157	1	8	0	1
GO:1901031	BP	p	regulation of response to reactive oxygen species	0/32	8/10157	1	6	0	1
GO:0045501	BP	p	regulation of sevenless signaling pathway	0/32	3/10157	1	11	0	1
GO:0000395	BP	p	mRNA 5'-splice site recognition	0/32	4/10157	1	9	0	1
GO:2000286	BP	p	receptor internalization involved in canonical Wnt signaling pathway	0/32	3/10157	1	8	0	1
GO:0060143	BP	p	positive regulation of syncytium formation by plasma membrane fusion	0/32	3/10157	1	6	0	1
GO:0015790	BP	p	UDP-xylose transmembrane transport	0/32	1/10157	1	8	0	1
GO:1905309	BP	p	positive regulation of cohesin loading	0/32	1/10157	1	10	0	1
GO:0009404	BP	p	toxin metabolic process	0/32	10/10157	1	3	0	1
GO:0098730	BP	p	male germline stem cell symmetric division	0/32	1/10157	1	6	0	1
GO:0048815	BP	p	hermaphrodite genitalia morphogenesis	0/32	1/10157	1	5	0	1
GO:0018216	BP	p	peptidyl-arginine methylation	0/32	7/10157	1	9	0	1
GO:0016926	BP	p	protein desumoylation	0/32	6/10157	1	9	0	1
GO:1904478	BP	p	regulation of intestinal absorption	0/32	3/10157	1	6	0	1
GO:0007506	BP	p	gonadal mesoderm development	0/32	6/10157	1	5	0	1
GO:0060795	BP	p	cell fate commitment involved in formation of primary germ layer	0/32	6/10157	1	4	0	1
GO:0060020	BP	p	Bergmann glial cell differentiation	0/32	1/10157	1	6	0	1
GO:0043576	BP	p	regulation of respiratory gaseous exchange	0/32	6/10157	1	4	0	1
GO:0006283	BP	p	transcription-coupled nucleotide-excision repair	0/32	16/10157	1	9	0	1
GO:0051454	BP	p	intracellular pH elevation	0/32	1/10157	1	11	0	1
GO:0006668	BP	p	sphinganine-1-phosphate metabolic process	0/32	1/10157	1	7	0	1
GO:0006183	BP	p	GTP biosynthetic process	0/32	5/10157	1	11	0	1
GO:0071480	BP	p	cellular response to gamma radiation	0/32	8/10157	1	7	0	1
GO:0019217	BP	p	regulation of fatty acid metabolic process	0/32	15/10157	1	6	0	1
GO:0000729	BP	p	DNA double-strand break processing	0/32	11/10157	1	7	0	1
GO:0006788	BP	p	heme oxidation	0/32	1/10157	1	7	0	1
GO:2001150	BP	p	positive regulation of dipeptide transmembrane transport	0/32	1/10157	1	9	0	1
GO:0018209	BP	p	peptidyl-serine modification	0/32	69/10157	1	8	0	1
GO:0110095	BP	p	cellular detoxification of aldehyde	0/32	13/10157	1	3	0	1
GO:0019530	BP	p	taurine metabolic process	0/32	4/10157	1	5	0	1
GO:0001841	BP	p	neural tube formation	0/32	4/10157	1	6	0	1
GO:0090101	BP	p	negative regulation of transmembrane receptor protein serine/threonine kinase signaling pathway	0/32	55/10157	1	7	0	1
GO:0000965	BP	p	mitochondrial RNA 3'-end processing	0/32	4/10157	1	9	0	1
GO:0071897	BP	p	DNA biosynthetic process	0/32	51/10157	1	7	0	1
GO:0061819	BP	p	telomeric DNA-containing double minutes formation	0/32	2/10157	1	10	0	1
GO:0090092	BP	p	regulation of transmembrane receptor protein serine/threonine kinase signaling pathway	0/32	78/10157	1	6	0	1
GO:0070875	BP	p	positive regulation of glycogen metabolic process	0/32	9/10157	1	9	0	1
GO:0014068	BP	p	positive regulation of phosphatidylinositol 3-kinase signaling	0/32	5/10157	1	8	0	1
GO:2000644	BP	p	regulation of receptor catabolic process	0/32	1/10157	1	6	0	1
GO:1905453	BP	p	regulation of myeloid progenitor cell differentiation	0/32	5/10157	1	7	0	1
GO:1902631	BP	p	negative regulation of membrane hyperpolarization	0/32	1/10157	1	5	0	1
GO:0032287	BP	p	peripheral nervous system myelin maintenance	0/32	1/10157	1	7	0	1
GO:0007451	BP	p	dorsal/ventral lineage restriction, imaginal disc	0/32	2/10157	1	4	0	1
GO:0051275	BP	p	beta-glucan catabolic process	0/32	1/10157	1	8	0	1
GO:0038034	BP	p	signal transduction in absence of ligand	0/32	3/10157	1	5	0	1
GO:0014044	BP	p	Schwann cell development	0/32	1/10157	1	5	0	1
GO:1901201	BP	p	regulation of extracellular matrix assembly	0/32	2/10157	1	6	0	1
GO:0098780	BP	p	response to mitochondrial depolarisation	0/32	6/10157	1	4	0	1
GO:0042953	BP	p	lipoprotein transport	0/32	2/10157	1	8	0	1
GO:0033169	BP	p	histone H3-K9 demethylation	0/32	30/10157	1	11	0	1
GO:0007505	BP	p	adult fat body development	0/32	1/10157	1	5	0	1
GO:0007538	BP	p	primary sex determination	0/32	6/10157	1	4	0	1
GO:0070286	BP	p	axonemal dynein complex assembly	0/32	29/10157	1	7	0	1
GO:0050652	BP	p	dermatan sulfate proteoglycan biosynthetic process, polysaccharide chain biosynthetic process	0/32	1/10157	1	7	0	1
GO:0002032	BP	p	desensitization of G protein-coupled receptor signaling pathway by arrestin	0/32	1/10157	1	9	0	1
GO:0006066	BP	p	alcohol metabolic process	0/32	151/10157	1	4	0	1
GO:0060903	BP	p	positive regulation of meiosis I	0/32	1/10157	1	9	0	1
GO:0035051	BP	p	cardiocyte differentiation	0/32	9/10157	1	4	0	1
GO:0032480	BP	p	negative regulation of type I interferon production	0/32	10/10157	1	6	0	1
GO:0098792	BP	p	xenophagy	0/32	3/10157	1	7	0	1
GO:0008295	BP	p	spermidine biosynthetic process	0/32	2/10157	1	9	0	1
GO:0090193	BP	p	positive regulation of glomerulus development	0/32	1/10157	1	7	0	1
GO:1901343	BP	p	negative regulation of vasculature development	0/32	8/10157	1	6	0	1
GO:0048813	BP	p	dendrite morphogenesis	0/32	99/10157	1	9	0	1
GO:0000056	BP	p	ribosomal small subunit export from nucleus	0/32	3/10157	1	13	0	1
GO:0071548	BP	p	response to dexamethasone	0/32	9/10157	1	8	0	1
GO:0003007	BP	p	heart morphogenesis	0/32	14/10157	1	4	0	1
GO:0006264	BP	p	mitochondrial DNA replication	0/32	6/10157	1	8	0	1
GO:0014074	BP	p	response to purine-containing compound	0/32	29/10157	1	5	0	1
GO:0033564	BP	p	anterior/posterior axon guidance	0/32	1/10157	1	5	0	1
GO:0000416	BP	p	positive regulation of histone H3-K36 methylation	0/32	1/10157	1	11	0	1
GO:0070076	BP	p	histone lysine demethylation	0/32	36/10157	1	10	0	1
GO:0051643	BP	p	endoplasmic reticulum localization	0/32	4/10157	1	4	0	1
GO:0034203	BP	p	glycolipid translocation	0/32	1/10157	1	7	0	1
GO:0034983	BP	p	peptidyl-lysine deacetylation	0/32	1/10157	1	9	0	1
GO:2000329	BP	p	negative regulation of T-helper 17 cell lineage commitment	0/32	1/10157	1	14	0	1
GO:0006546	BP	p	glycine catabolic process	0/32	3/10157	1	10	0	1
GO:0070898	BP	p	RNA polymerase III preinitiation complex assembly	0/32	4/10157	1	9	0	1
GO:0042421	BP	p	norepinephrine biosynthetic process	0/32	3/10157	1	8	0	1
GO:2000376	BP	p	positive regulation of oxygen metabolic process	0/32	1/10157	1	6	0	1
GO:0080111	BP	p	DNA demethylation	0/32	5/10157	1	9	0	1
GO:0070544	BP	p	histone H3-K36 demethylation	0/32	26/10157	1	11	0	1
GO:0006474	BP	p	N-terminal protein amino acid acetylation	0/32	18/10157	1	9	0	1
GO:0044058	BP	p	regulation of digestive system process	0/32	5/10157	1	5	0	1
GO:0050663	BP	p	cytokine secretion	0/32	4/10157	1	9	0	1
GO:1903131	BP	p	mononuclear cell differentiation	0/32	5/10157	1	5	0	1
GO:1904467	BP	p	regulation of tumor necrosis factor secretion	0/32	4/10157	1	9	0	1
GO:0072004	BP	p	kidney field specification	0/32	1/10157	1	5	0	1
GO:0021540	BP	p	corpus callosum morphogenesis	0/32	2/10157	1	12	0	1
GO:0072583	BP	p	clathrin-dependent endocytosis	0/32	21/10157	1	7	0	1
GO:0070371	BP	p	ERK1 and ERK2 cascade	0/32	2/10157	1	10	0	1
GO:0045313	BP	p	rhabdomere membrane biogenesis	0/32	1/10157	1	5	0	1
GO:0014848	BP	p	urinary tract smooth muscle contraction	0/32	3/10157	1	6	0	1
GO:0033189	BP	p	response to vitamin A	0/32	2/10157	1	7	0	1
GO:0060218	BP	p	hematopoietic stem cell differentiation	0/32	4/10157	1	5	0	1
GO:0071681	BP	p	cellular response to indole-3-methanol	0/32	1/10157	1	6	0	1
GO:0051601	BP	p	exocyst localization	0/32	4/10157	1	6	0	1
GO:0060545	BP	p	positive regulation of necroptotic process	0/32	1/10157	1	8	0	1
GO:0008333	BP	p	endosome to lysosome transport	0/32	27/10157	1	6	0	1
GO:0048842	BP	p	positive regulation of axon extension involved in axon guidance	0/32	2/10157	1	12	0	1
GO:0009265	BP	p	2'-deoxyribonucleotide biosynthetic process	0/32	7/10157	1	10	0	1
GO:1901906	BP	p	diadenosine pentaphosphate metabolic process	0/32	1/10157	1	9	0	1
GO:0072156	BP	p	distal tubule morphogenesis	0/32	3/10157	1	8	0	1
GO:0043065	BP	p	positive regulation of apoptotic process	0/32	167/10157	1	7	0	1
GO:0045213	BP	p	neurotransmitter receptor metabolic process	0/32	5/10157	1	6	0	1
GO:1900112	BP	p	regulation of histone H3-K9 trimethylation	0/32	3/10157	1	11	0	1
GO:0042074	BP	p	cell migration involved in gastrulation	0/32	15/10157	1	6	0	1
GO:1901314	BP	p	regulation of histone H2A K63-linked ubiquitination	0/32	4/10157	1	12	0	1
GO:0007192	BP	p	adenylate cyclase-activating serotonin receptor signaling pathway	0/32	2/10157	1	10	0	1
GO:0120187	BP	p	positive regulation of protein localization to chromatin	0/32	1/10157	1	7	0	1
GO:0042311	BP	p	vasodilation	0/32	2/10157	1	8	0	1
GO:0032963	BP	p	collagen metabolic process	0/32	15/10157	1	2	0	1
GO:0010641	BP	p	positive regulation of platelet-derived growth factor receptor signaling pathway	0/32	1/10157	1	7	0	1
GO:0060623	BP	p	regulation of chromosome condensation	0/32	2/10157	1	7	0	1
GO:0055090	BP	p	acylglycerol homeostasis	0/32	17/10157	1	6	0	1
GO:0007294	BP	p	germarium-derived oocyte fate determination	0/32	17/10157	1	5	0	1
GO:0033007	BP	p	negative regulation of mast cell activation involved in immune response	0/32	2/10157	1	8	0	1
GO:0048668	BP	p	collateral sprouting	0/32	3/10157	1	4	0	1
GO:0007026	BP	p	negative regulation of microtubule depolymerization	0/32	11/10157	1	10	0	1
GO:0034036	BP	p	purine ribonucleoside bisphosphate biosynthetic process	0/32	1/10157	1	10	0	1
GO:0009191	BP	p	ribonucleoside diphosphate catabolic process	0/32	2/10157	1	9	0	1
GO:0097156	BP	p	fasciculation of motor neuron axon	0/32	1/10157	1	9	0	1
GO:0097278	BP	p	complement-dependent cytotoxicity	0/32	1/10157	1	3	0	1
GO:0007307	BP	p	eggshell chorion gene amplification	0/32	7/10157	1	9	0	1
GO:0035335	BP	p	peptidyl-tyrosine dephosphorylation	0/32	10/10157	1	8	0	1
GO:0071763	BP	p	nuclear membrane organization	0/32	2/10157	1	5	0	1
GO:0016081	BP	p	synaptic vesicle docking	0/32	18/10157	1	7	0	1
GO:0051835	BP	p	positive regulation of synapse structural plasticity	0/32	1/10157	1	7	0	1
GO:0097338	BP	p	response to clozapine	0/32	1/10157	1	5	0	1
GO:0050920	BP	p	regulation of chemotaxis	0/32	41/10157	1	5	0	1
GO:0055013	BP	p	cardiac muscle cell development	0/32	8/10157	1	6	0	1
GO:1903966	BP	p	monounsaturated fatty acid biosynthetic process	0/32	6/10157	1	10	0	1
GO:0060350	BP	p	endochondral bone morphogenesis	0/32	1/10157	1	5	0	1
GO:0009111	BP	p	vitamin catabolic process	0/32	1/10157	1	4	0	1
GO:0071314	BP	p	cellular response to cocaine	0/32	1/10157	1	7	0	1
GO:0015628	BP	p	protein secretion by the type II secretion system	0/32	1/10157	1	10	0	1
GO:0042713	BP	p	sperm ejaculation	0/32	1/10157	1	3	0	1
GO:0072697	BP	p	protein localization to cell cortex	0/32	6/10157	1	6	0	1
GO:0007340	BP	p	acrosome reaction	0/32	1/10157	1	2	0	1
GO:0044029	BP	p	hypomethylation of CpG island	0/32	1/10157	1	9	0	1
GO:0000266	BP	p	mitochondrial fission	0/32	5/10157	1	6	0	1
GO:0016139	BP	p	glycoside catabolic process	0/32	7/10157	1	6	0	1
GO:0034501	BP	p	protein localization to kinetochore	0/32	12/10157	1	8	0	1
GO:0070268	BP	p	cornification	0/32	3/10157	1	4	0	1
GO:0048846	BP	p	axon extension involved in axon guidance	0/32	4/10157	1	6	0	1
GO:0009589	BP	p	detection of UV	0/32	2/10157	1	6	0	1
GO:0045078	BP	p	positive regulation of interferon-gamma biosynthetic process	0/32	1/10157	1	8	0	1
GO:1900244	BP	p	positive regulation of synaptic vesicle endocytosis	0/32	2/10157	1	9	0	1
GO:0048539	BP	p	bone marrow development	0/32	5/10157	1	5	0	1
GO:2000821	BP	p	regulation of grooming behavior	0/32	1/10157	1	4	0	1
GO:0021694	BP	p	cerebellar Purkinje cell layer formation	0/32	1/10157	1	3	0	1
GO:0006853	BP	p	carnitine shuttle	0/32	2/10157	1	11	0	1
GO:1903047	BP	p	mitotic cell cycle process	1/32	336/10157	1	3	1	1	Ppup133960.1
GO:1900114	BP	p	positive regulation of histone H3-K9 trimethylation	0/32	1/10157	1	12	0	1
GO:0051703	BP	p	intraspecies interaction between organisms	0/32	19/10157	1	1	0	1
GO:0060055	BP	p	angiogenesis involved in wound healing	0/32	2/10157	1	4	0	1
GO:0010455	BP	p	positive regulation of cell fate commitment	0/32	3/10157	1	6	0	1
GO:0032467	BP	p	positive regulation of cytokinesis	0/32	16/10157	1	7	0	1
GO:0052205	BP	p	modulation of molecular function in other organism involved in symbiotic interaction	0/32	3/10157	1	4	0	1
GO:0071375	BP	p	cellular response to peptide hormone stimulus	0/32	44/10157	1	7	0	1
GO:0051966	BP	p	regulation of synaptic transmission, glutamatergic	0/32	24/10157	1	7	0	1
GO:0048671	BP	p	negative regulation of collateral sprouting	0/32	2/10157	1	11	0	1
GO:0032479	BP	p	regulation of type I interferon production	0/32	28/10157	1	5	0	1
GO:0035017	BP	p	cuticle pattern formation	0/32	16/10157	1	4	0	1
GO:0106072	BP	p	negative regulation of adenylate cyclase-activating G protein-coupled receptor signaling pathway	0/32	1/10157	1	9	0	1
GO:0035268	BP	p	protein mannosylation	0/32	12/10157	1	8	0	1
GO:0061074	BP	p	regulation of neural retina development	0/32	1/10157	1	6	0	1
GO:0048792	BP	p	spontaneous exocytosis of neurotransmitter	0/32	1/10157	1	9	0	1
GO:1900077	BP	p	negative regulation of cellular response to insulin stimulus	0/32	17/10157	1	5	0	1
GO:0016137	BP	p	glycoside metabolic process	0/32	15/10157	1	5	0	1
GO:0010310	BP	p	regulation of hydrogen peroxide metabolic process	0/32	1/10157	1	6	0	1
GO:0031297	BP	p	replication fork processing	0/32	16/10157	1	8	0	1
GO:0046218	BP	p	indolalkylamine catabolic process	0/32	4/10157	1	8	0	1
GO:1903845	BP	p	negative regulation of cellular response to transforming growth factor beta stimulus	0/32	16/10157	1	6	0	1
GO:0045820	BP	p	negative regulation of glycolytic process	0/32	4/10157	1	10	0	1
GO:0051851	BP	p	modulation by host of symbiont process	0/32	23/10157	1	4	0	1
GO:0030719	BP	p	P granule organization	0/32	6/10157	1	5	0	1
GO:0009407	BP	p	toxin catabolic process	0/32	1/10157	1	4	0	1
GO:0060973	BP	p	cell migration involved in heart development	0/32	4/10157	1	5	0	1
GO:0060444	BP	p	branching involved in mammary gland duct morphogenesis	0/32	5/10157	1	7	0	1
GO:0051292	BP	p	nuclear pore complex assembly	0/32	7/10157	1	7	0	1
GO:0009437	BP	p	carnitine metabolic process	0/32	1/10157	1	6	0	1
GO:1900076	BP	p	regulation of cellular response to insulin stimulus	0/32	29/10157	1	4	0	1
GO:0045657	BP	p	positive regulation of monocyte differentiation	0/32	1/10157	1	9	0	1
GO:0001702	BP	p	gastrulation with mouth forming second	0/32	9/10157	1	5	0	1
GO:1903298	BP	p	negative regulation of hypoxia-induced intrinsic apoptotic signaling pathway	0/32	1/10157	1	10	0	1
GO:0043558	BP	p	regulation of translational initiation in response to stress	0/32	13/10157	1	9	0	1
GO:0043568	BP	p	positive regulation of insulin-like growth factor receptor signaling pathway	0/32	5/10157	1	7	0	1
GO:0006267	BP	p	pre-replicative complex assembly involved in nuclear cell cycle DNA replication	0/32	11/10157	1	10	0	1
GO:1901407	BP	p	regulation of phosphorylation of RNA polymerase II C-terminal domain	0/32	4/10157	1	11	0	1
GO:0060219	BP	p	camera-type eye photoreceptor cell differentiation	0/32	5/10157	1	7	0	1
GO:0019518	BP	p	L-threonine catabolic process to glycine	0/32	2/10157	1	11	0	1
GO:0051084	BP	p	'de novo' posttranslational protein folding	0/32	19/10157	1	4	0	1
GO:1900107	BP	p	regulation of nodal signaling pathway	0/32	1/10157	1	8	0	1
GO:0000280	BP	p	nuclear division	0/32	39/10157	1	6	0	1
GO:0044766	BP	p	multi-organism transport	0/32	42/10157	1	4	0	1
GO:0006982	BP	p	response to lipid hydroperoxide	0/32	1/10157	1	5	0	1
GO:2000769	BP	p	regulation of establishment or maintenance of cell polarity regulating cell shape	0/32	1/10157	1	7	0	1
GO:1903209	BP	p	positive regulation of oxidative stress-induced cell death	0/32	2/10157	1	8	0	1
GO:2000359	BP	p	regulation of binding of sperm to zona pellucida	0/32	2/10157	1	5	0	1
GO:1904959	BP	p	regulation of cytochrome-c oxidase activity	0/32	1/10157	1	9	0	1
GO:0010171	BP	p	body morphogenesis	0/32	2/10157	1	3	0	1
GO:0006756	BP	p	AMP phosphorylation	0/32	1/10157	1	12	0	1
GO:0006984	BP	p	ER-nucleus signaling pathway	0/32	8/10157	1	5	0	1
GO:0033396	BP	p	beta-alanine biosynthetic process via 3-ureidopropionate	0/32	3/10157	1	9	0	1
GO:0042423	BP	p	catecholamine biosynthetic process	0/32	10/10157	1	7	0	1
GO:0045497	BP	p	female analia development	0/32	2/10157	1	4	0	1
GO:0046669	BP	p	regulation of compound eye retinal cell programmed cell death	0/32	9/10157	1	7	0	1
GO:1904398	BP	p	positive regulation of neuromuscular junction development	0/32	20/10157	1	7	0	1
GO:0070197	BP	p	meiotic attachment of telomere to nuclear envelope	0/32	2/10157	1	6	0	1
GO:0042138	BP	p	meiotic DNA double-strand break formation	0/32	2/10157	1	7	0	1
GO:0002313	BP	p	mature B cell differentiation involved in immune response	0/32	3/10157	1	8	0	1
GO:0001837	BP	p	epithelial to mesenchymal transition	0/32	10/10157	1	5	0	1
GO:1905476	BP	p	negative regulation of protein localization to membrane	0/32	7/10157	1	7	0	1
GO:0051301	BP	p	cell division	0/32	273/10157	1	2	0	1
GO:1901631	BP	p	positive regulation of presynaptic membrane organization	0/32	2/10157	1	7	0	1
GO:1901526	BP	p	positive regulation of mitophagy	0/32	1/10157	1	9	0	1
GO:1903061	BP	p	positive regulation of protein lipidation	0/32	4/10157	1	9	0	1
GO:0060148	BP	p	positive regulation of posttranscriptional gene silencing	0/32	11/10157	1	8	0	1
GO:0097190	BP	p	apoptotic signaling pathway	0/32	53/10157	1	5	0	1
GO:0006901	BP	p	vesicle coating	0/32	15/10157	1	6	0	1
GO:0031442	BP	p	positive regulation of mRNA 3'-end processing	0/32	6/10157	1	10	0	1
GO:0043500	BP	p	muscle adaptation	0/32	5/10157	1	4	0	1
GO:0150105	BP	p	protein localization to cell-cell junction	0/32	6/10157	1	5	0	1
GO:0031532	BP	p	actin cytoskeleton reorganization	0/32	27/10157	1	7	0	1
GO:0010919	BP	p	regulation of inositol phosphate biosynthetic process	0/32	2/10157	1	7	0	1
GO:0019068	BP	p	virion assembly	0/32	6/10157	1	4	0	1
GO:0071985	BP	p	multivesicular body sorting pathway	0/32	21/10157	1	5	0	1
GO:0035880	BP	p	embryonic nail plate morphogenesis	0/32	1/10157	1	4	0	1
GO:0045199	BP	p	maintenance of epithelial cell apical/basal polarity	0/32	20/10157	1	6	0	1
GO:0035902	BP	p	response to immobilization stress	0/32	2/10157	1	3	0	1
GO:0042430	BP	p	indole-containing compound metabolic process	0/32	17/10157	1	4	0	1
GO:0035115	BP	p	embryonic forelimb morphogenesis	0/32	4/10157	1	6	0	1
GO:0051145	BP	p	smooth muscle cell differentiation	0/32	4/10157	1	5	0	1
GO:0051309	BP	p	female meiosis chromosome separation	0/32	1/10157	1	6	0	1
GO:1904579	BP	p	cellular response to thapsigargin	0/32	2/10157	1	6	0	1
GO:0009069	BP	p	serine family amino acid metabolic process	0/32	30/10157	1	8	0	1
GO:0060397	BP	p	growth hormone receptor signaling pathway via JAK-STAT	0/32	1/10157	1	9	0	1
GO:1900451	BP	p	positive regulation of glutamate receptor signaling pathway	0/32	5/10157	1	7	0	1
GO:0033605	BP	p	positive regulation of catecholamine secretion	0/32	1/10157	1	8	0	1
GO:1903705	BP	p	positive regulation of production of siRNA involved in RNA interference	0/32	2/10157	1	10	0	1
GO:0021798	BP	p	forebrain dorsal/ventral pattern formation	0/32	1/10157	1	5	0	1
GO:0006015	BP	p	5-phosphoribose 1-diphosphate biosynthetic process	0/32	3/10157	1	7	0	1
GO:0019303	BP	p	D-ribose catabolic process	0/32	1/10157	1	7	0	1
GO:0032000	BP	p	positive regulation of fatty acid beta-oxidation	0/32	2/10157	1	9	0	1
GO:0034030	BP	p	ribonucleoside bisphosphate biosynthetic process	0/32	31/10157	1	9	0	1
GO:0040034	BP	p	regulation of development, heterochronic	0/32	13/10157	1	4	0	1
GO:0010424	BP	p	DNA methylation on cytosine within a CG sequence	0/32	2/10157	1	11	0	1
GO:0034381	BP	p	plasma lipoprotein particle clearance	0/32	6/10157	1	2	0	1
GO:0014003	BP	p	oligodendrocyte development	0/32	8/10157	1	5	0	1
GO:0008037	BP	p	cell recognition	0/32	110/10157	1	2	0	1
GO:0000956	BP	p	nuclear-transcribed mRNA catabolic process	0/32	73/10157	1	9	0	1
GO:0030318	BP	p	melanocyte differentiation	0/32	9/10157	1	5	0	1
GO:0061357	BP	p	positive regulation of Wnt protein secretion	0/32	3/10157	1	9	0	1
GO:0036158	BP	p	outer dynein arm assembly	0/32	9/10157	1	8	0	1
GO:0003374	BP	p	dynamin family protein polymerization involved in mitochondrial fission	0/32	1/10157	1	9	0	1
GO:0033197	BP	p	response to vitamin E	0/32	2/10157	1	7	0	1
GO:2000850	BP	p	negative regulation of glucocorticoid secretion	0/32	2/10157	1	11	0	1
GO:0051890	BP	p	regulation of cardioblast differentiation	0/32	5/10157	1	6	0	1
GO:0050764	BP	p	regulation of phagocytosis	0/32	18/10157	1	6	0	1
GO:1904950	BP	p	negative regulation of establishment of protein localization	0/32	58/10157	1	6	0	1
GO:1903147	BP	p	negative regulation of autophagy of mitochondrion	0/32	3/10157	1	8	0	1
GO:0090110	BP	p	COPII-coated vesicle cargo loading	0/32	9/10157	1	5	0	1
GO:0016199	BP	p	axon midline choice point recognition	0/32	51/10157	1	5	0	1
GO:0045905	BP	p	positive regulation of translational termination	0/32	2/10157	1	9	0	1
GO:0061620	BP	p	glycolytic process through glucose-6-phosphate	0/32	3/10157	1	14	0	1
GO:2000706	BP	p	negative regulation of dense core granule biogenesis	0/32	1/10157	1	6	0	1
GO:0051494	BP	p	negative regulation of cytoskeleton organization	0/32	48/10157	1	7	0	1
GO:0000578	BP	p	embryonic axis specification	0/32	20/10157	1	4	0	1
GO:0098760	BP	p	response to interleukin-7	0/32	3/10157	1	5	0	1
GO:0003429	BP	p	growth plate cartilage chondrocyte morphogenesis	0/32	1/10157	1	7	0	1
GO:1901028	BP	p	regulation of mitochondrial outer membrane permeabilization involved in apoptotic signaling pathway	0/32	2/10157	1	8	0	1
GO:0050993	BP	p	dimethylallyl diphosphate metabolic process	0/32	1/10157	1	6	0	1
GO:1903530	BP	p	regulation of secretion by cell	0/32	168/10157	1	6	0	1
GO:1902473	BP	p	regulation of protein localization to synapse	0/32	7/10157	1	5	0	1
GO:0000303	BP	p	response to superoxide	0/32	3/10157	1	6	0	1
GO:2001222	BP	p	regulation of neuron migration	0/32	11/10157	1	7	0	1
GO:0046337	BP	p	phosphatidylethanolamine metabolic process	0/32	8/10157	1	7	0	1
GO:0015787	BP	p	UDP-glucuronic acid transmembrane transport	0/32	2/10157	1	9	0	1
GO:0098870	BP	p	action potential propagation	0/32	1/10157	1	5	0	1
GO:0050867	BP	p	positive regulation of cell activation	0/32	34/10157	1	5	0	1
GO:0097054	BP	p	L-glutamate biosynthetic process	0/32	1/10157	1	11	0	1
GO:0032673	BP	p	regulation of interleukin-4 production	0/32	1/10157	1	5	0	1
GO:0007588	BP	p	excretion	0/32	6/10157	1	3	0	1
GO:0046651	BP	p	lymphocyte proliferation	0/32	10/10157	1	5	0	1
GO:0030510	BP	p	regulation of BMP signaling pathway	0/32	52/10157	1	11	0	1
GO:0007420	BP	p	brain development	0/32	67/10157	1	4	0	1
GO:0034443	BP	p	negative regulation of lipoprotein oxidation	0/32	4/10157	1	8	0	1
GO:1990918	BP	p	double-strand break repair involved in meiotic recombination	0/32	5/10157	1	9	0	1
GO:0010631	BP	p	epithelial cell migration	0/32	82/10157	1	6	0	1
GO:0051124	BP	p	synaptic growth at neuromuscular junction	0/32	14/10157	1	7	0	1
GO:0000055	BP	p	ribosomal large subunit export from nucleus	0/32	5/10157	1	13	0	1
GO:0046072	BP	p	dTDP metabolic process	0/32	1/10157	1	11	0	1
GO:0010457	BP	p	centriole-centriole cohesion	0/32	4/10157	1	3	0	1
GO:0006111	BP	p	regulation of gluconeogenesis	0/32	10/10157	1	8	0	1
GO:0060986	BP	p	endocrine hormone secretion	0/32	3/10157	1	8	0	1
GO:0072425	BP	p	signal transduction involved in G2 DNA damage checkpoint	0/32	2/10157	1	9	0	1
GO:0042420	BP	p	dopamine catabolic process	0/32	5/10157	1	8	0	1
GO:0031667	BP	p	response to nutrient levels	0/32	171/10157	1	4	0	1
GO:1900038	BP	p	negative regulation of cellular response to hypoxia	0/32	4/10157	1	7	0	1
GO:0071498	BP	p	cellular response to fluid shear stress	0/32	4/10157	1	4	0	1
GO:0032418	BP	p	lysosome localization	0/32	16/10157	1	4	0	1
GO:0035308	BP	p	negative regulation of protein dephosphorylation	0/32	12/10157	1	9	0	1
GO:0051790	BP	p	short-chain fatty acid biosynthetic process	0/32	1/10157	1	9	0	1
GO:0072599	BP	p	establishment of protein localization to endoplasmic reticulum	0/32	19/10157	1	7	0	1
GO:0046294	BP	p	formaldehyde catabolic process	0/32	1/10157	1	6	0	1
GO:0002784	BP	p	regulation of antimicrobial peptide production	0/32	42/10157	1	7	0	1
GO:0032649	BP	p	regulation of interferon-gamma production	0/32	7/10157	1	5	0	1
GO:0006732	BP	p	coenzyme metabolic process	0/32	152/10157	1	4	0	1
GO:0071712	BP	p	ER-associated misfolded protein catabolic process	0/32	6/10157	1	9	0	1
GO:0008362	BP	p	chitin-based embryonic cuticle biosynthetic process	0/32	8/10157	1	5	0	1
GO:0007482	BP	p	haltere development	0/32	4/10157	1	5	0	1
GO:0046888	BP	p	negative regulation of hormone secretion	0/32	16/10157	1	8	0	1
GO:0032986	BP	p	protein-DNA complex disassembly	0/32	7/10157	1	6	0	1
GO:0010212	BP	p	response to ionizing radiation	0/32	59/10157	1	4	0	1
GO:0045357	BP	p	regulation of interferon-beta biosynthetic process	0/32	2/10157	1	7	0	1
GO:0055092	BP	p	sterol homeostasis	0/32	36/10157	1	6	0	1
GO:0070255	BP	p	regulation of mucus secretion	0/32	1/10157	1	6	0	1
GO:0009992	BP	p	cellular water homeostasis	0/32	1/10157	1	7	0	1
GO:2001113	BP	p	negative regulation of cellular response to hepatocyte growth factor stimulus	0/32	1/10157	1	6	0	1
GO:0043408	BP	p	regulation of MAPK cascade	0/32	152/10157	1	9	0	1
GO:0021670	BP	p	lateral ventricle development	0/32	2/10157	1	3	0	1
GO:0034197	BP	p	triglyceride transport	0/32	1/10157	1	7	0	1
GO:0070236	BP	p	negative regulation of activation-induced cell death of T cells	0/32	1/10157	1	11	0	1
GO:0007381	BP	p	specification of segmental identity, labial segment	0/32	1/10157	1	5	0	1
GO:0097192	BP	p	extrinsic apoptotic signaling pathway in absence of ligand	0/32	3/10157	1	7	0	1
GO:0009047	BP	p	dosage compensation by hyperactivation of X chromosome	0/32	1/10157	1	8	0	1
GO:0048636	BP	p	positive regulation of muscle organ development	0/32	10/10157	1	6	0	1
GO:2000785	BP	p	regulation of autophagosome assembly	0/32	12/10157	1	8	0	1
GO:0035151	BP	p	regulation of tube size, open tracheal system	0/32	28/10157	1	5	0	1
GO:0098657	BP	p	import into cell	0/32	76/10157	1	4	0	1
GO:0001178	BP	p	regulation of transcriptional start site selection at RNA polymerase II promoter	0/32	3/10157	1	12	0	1
GO:1901162	BP	p	primary amino compound biosynthetic process	0/32	5/10157	1	5	0	1
GO:0016072	BP	p	rRNA metabolic process	0/32	152/10157	1	8	0	1
GO:0060712	BP	p	spongiotrophoblast layer development	0/32	2/10157	1	4	0	1
GO:0051647	BP	p	nucleus localization	0/32	27/10157	1	4	0	1
GO:0033334	BP	p	fin morphogenesis	0/32	3/10157	1	4	0	1
GO:0032205	BP	p	negative regulation of telomere maintenance	0/32	14/10157	1	8	0	1
GO:2000771	BP	p	positive regulation of establishment or maintenance of cell polarity regulating cell shape	0/32	1/10157	1	8	0	1
GO:0008360	BP	p	regulation of cell shape	0/32	57/10157	1	6	0	1
GO:0007344	BP	p	pronuclear fusion	0/32	1/10157	1	7	0	1
GO:0090166	BP	p	Golgi disassembly	0/32	2/10157	1	6	0	1
GO:0032055	BP	p	negative regulation of translation in response to stress	0/32	2/10157	1	9	0	1
GO:0031334	BP	p	positive regulation of protein-containing complex assembly	0/32	67/10157	1	6	0	1
GO:0060732	BP	p	positive regulation of inositol phosphate biosynthetic process	0/32	1/10157	1	8	0	1
GO:0051228	BP	p	mitotic spindle disassembly	0/32	2/10157	1	9	0	1
GO:0019054	BP	p	modulation by virus of host cellular process	0/32	5/10157	1	6	0	1
GO:0032474	BP	p	otolith morphogenesis	0/32	6/10157	1	4	0	1
GO:2000878	BP	p	positive regulation of oligopeptide transport	0/32	1/10157	1	7	0	1
GO:0034316	BP	p	negative regulation of Arp2/3 complex-mediated actin nucleation	0/32	3/10157	1	13	0	1
GO:0098856	BP	p	intestinal lipid absorption	0/32	4/10157	1	6	0	1
GO:0043058	BP	p	regulation of backward locomotion	0/32	3/10157	1	4	0	1
GO:0006552	BP	p	leucine catabolic process	0/32	4/10157	1	9	0	1
GO:0032097	BP	p	positive regulation of response to food	0/32	5/10157	1	8	0	1
GO:0120177	BP	p	negative regulation of torso signaling pathway	0/32	1/10157	1	7	0	1
GO:1903427	BP	p	negative regulation of reactive oxygen species biosynthetic process	0/32	4/10157	1	7	0	1
GO:0071322	BP	p	cellular response to carbohydrate stimulus	0/32	21/10157	1	5	0	1
GO:0099175	BP	p	regulation of postsynapse organization	0/32	26/10157	1	6	0	1
GO:0097380	BP	p	dorsal spinal cord interneuron anterior axon guidance	0/32	1/10157	1	8	0	1
GO:0009453	BP	p	energy taxis	0/32	16/10157	1	3	0	1
GO:0072236	BP	p	metanephric loop of Henle development	0/32	1/10157	1	9	0	1
GO:0030100	BP	p	regulation of endocytosis	0/32	77/10157	1	6	0	1
GO:0031339	BP	p	negative regulation of vesicle fusion	0/32	2/10157	1	7	0	1
GO:0071029	BP	p	nuclear ncRNA surveillance	0/32	7/10157	1	10	0	1
GO:0035311	BP	p	wing cell fate specification	0/32	2/10157	1	5	0	1
GO:0015870	BP	p	acetylcholine transport	0/32	3/10157	1	7	0	1
GO:0000289	BP	p	nuclear-transcribed mRNA poly(A) tail shortening	0/32	13/10157	1	10	0	1
GO:0035729	BP	p	cellular response to hepatocyte growth factor stimulus	0/32	4/10157	1	6	0	1
GO:0039693	BP	p	viral DNA genome replication	0/32	1/10157	1	5	0	1
GO:0051078	BP	p	meiotic nuclear envelope disassembly	0/32	1/10157	1	7	0	1
GO:1901655	BP	p	cellular response to ketone	0/32	28/10157	1	5	0	1
GO:0033599	BP	p	regulation of mammary gland epithelial cell proliferation	0/32	2/10157	1	6	0	1
GO:0072560	BP	p	type B pancreatic cell maturation	0/32	1/10157	1	8	0	1
GO:0030638	BP	p	polyketide metabolic process	0/32	8/10157	1	3	0	1
GO:0048800	BP	p	antennal morphogenesis	0/32	8/10157	1	4	0	1
GO:0007060	BP	p	male meiosis chromosome segregation	0/32	3/10157	1	5	0	1
GO:0046031	BP	p	ADP metabolic process	0/32	27/10157	1	10	0	1
GO:0019731	BP	p	antibacterial humoral response	0/32	7/10157	1	7	0	1
GO:0042532	BP	p	negative regulation of tyrosine phosphorylation of STAT protein	0/32	2/10157	1	11	0	1
GO:0050906	BP	p	detection of stimulus involved in sensory perception	0/32	85/10157	1	3	0	1
GO:1900074	BP	p	negative regulation of neuromuscular synaptic transmission	0/32	4/10157	1	8	0	1
GO:1903676	BP	p	positive regulation of cap-dependent translational initiation	0/32	1/10157	1	11	0	1
GO:1902221	BP	p	erythrose 4-phosphate/phosphoenolpyruvate family amino acid metabolic process	0/32	7/10157	1	8	0	1
GO:0046034	BP	p	ATP metabolic process	0/32	59/10157	1	2	0	1
GO:1900011	BP	p	negative regulation of corticotropin-releasing hormone receptor activity	0/32	1/10157	1	8	0	1
GO:0046475	BP	p	glycerophospholipid catabolic process	0/32	8/10157	1	7	0	1
GO:2000378	BP	p	negative regulation of reactive oxygen species metabolic process	0/32	8/10157	1	6	0	1
GO:1902101	BP	p	positive regulation of metaphase/anaphase transition of cell cycle	0/32	7/10157	1	9	0	1
GO:0042159	BP	p	lipoprotein catabolic process	0/32	5/10157	1	6	0	1
GO:0048210	BP	p	Golgi vesicle fusion to target membrane	0/32	2/10157	1	8	0	1
GO:0019322	BP	p	pentose biosynthetic process	0/32	1/10157	1	6	0	1
GO:1904781	BP	p	positive regulation of protein localization to centrosome	0/32	3/10157	1	7	0	1
GO:0032483	BP	p	regulation of Rab protein signal transduction	0/32	3/10157	1	9	0	1
GO:1903233	BP	p	regulation of calcium ion-dependent exocytosis of neurotransmitter	0/32	2/10157	1	10	0	1
GO:0050777	BP	p	negative regulation of immune response	0/32	42/10157	1	5	0	1
GO:0006646	BP	p	phosphatidylethanolamine biosynthetic process	0/32	6/10157	1	8	0	1
GO:0030422	BP	p	production of siRNA involved in RNA interference	0/32	16/10157	1	10	0	1
GO:0009202	BP	p	deoxyribonucleoside triphosphate biosynthetic process	0/32	3/10157	1	9	0	1
GO:1904578	BP	p	response to thapsigargin	0/32	2/10157	1	5	0	1
GO:0048264	BP	p	determination of ventral identity	0/32	2/10157	1	5	0	1
GO:0006274	BP	p	DNA replication termination	0/32	1/10157	1	7	0	1
GO:1902403	BP	p	signal transduction involved in mitotic DNA integrity checkpoint	0/32	10/10157	1	8	0	1
GO:0006522	BP	p	alanine metabolic process	0/32	5/10157	1	9	0	1
GO:0046835	BP	p	carbohydrate phosphorylation	0/32	5/10157	1	6	0	1
GO:1904161	BP	p	DNA synthesis involved in UV-damage excision repair	0/32	1/10157	1	9	0	1
GO:0019732	BP	p	antifungal humoral response	0/32	1/10157	1	7	0	1
GO:1903363	BP	p	negative regulation of cellular protein catabolic process	0/32	24/10157	1	8	0	1
GO:0061097	BP	p	regulation of protein tyrosine kinase activity	0/32	13/10157	1	10	0	1
GO:0042247	BP	p	establishment of planar polarity of follicular epithelium	0/32	2/10157	1	5	0	1
GO:1990961	BP	p	xenobiotic detoxification by transmembrane export across the plasma membrane	0/32	1/10157	1	6	0	1
GO:0040002	BP	p	collagen and cuticulin-based cuticle development	0/32	2/10157	1	4	0	1
GO:0006060	BP	p	sorbitol metabolic process	0/32	3/10157	1	8	0	1
GO:0040013	BP	p	negative regulation of locomotion	0/32	47/10157	1	4	0	1
GO:0006304	BP	p	DNA modification	0/32	26/10157	1	7	0	1
GO:0031038	BP	p	myosin II filament organization	0/32	4/10157	1	8	0	1
GO:0086036	BP	p	regulation of cardiac muscle cell membrane potential	0/32	10/10157	1	4	0	1
GO:0046125	BP	p	pyrimidine deoxyribonucleoside metabolic process	0/32	1/10157	1	8	0	1
GO:0060295	BP	p	regulation of cilium movement involved in cell motility	0/32	5/10157	1	7	0	1
GO:0043401	BP	p	steroid hormone mediated signaling pathway	0/32	11/10157	1	6	0	1
GO:0031664	BP	p	regulation of lipopolysaccharide-mediated signaling pathway	0/32	2/10157	1	6	0	1
GO:0009988	BP	p	cell-cell recognition	0/32	7/10157	1	3	0	1
GO:0090148	BP	p	membrane fission	0/32	5/10157	1	5	0	1
GO:0001709	BP	p	cell fate determination	0/32	77/10157	1	3	0	1
GO:0033135	BP	p	regulation of peptidyl-serine phosphorylation	0/32	21/10157	1	9	0	1
GO:0001967	BP	p	suckling behavior	0/32	5/10157	1	3	0	1
GO:0032259	BP	p	methylation	0/32	133/10157	1	2	0	1
GO:0030307	BP	p	positive regulation of cell growth	0/32	56/10157	1	6	0	1
GO:0046479	BP	p	glycosphingolipid catabolic process	0/32	8/10157	1	8	0	1
GO:0048135	BP	p	female germ-line cyst formation	0/32	6/10157	1	4	0	1
GO:1900113	BP	p	negative regulation of histone H3-K9 trimethylation	0/32	1/10157	1	12	0	1
GO:0035331	BP	p	negative regulation of hippo signaling	0/32	9/10157	1	8	0	1
GO:0035987	BP	p	endodermal cell differentiation	0/32	1/10157	1	4	0	1
GO:0042659	BP	p	regulation of cell fate specification	0/32	20/10157	1	6	0	1
GO:0009913	BP	p	epidermal cell differentiation	0/32	12/10157	1	5	0	1
GO:0051984	BP	p	positive regulation of chromosome segregation	0/32	13/10157	1	5	0	1
GO:0032304	BP	p	negative regulation of icosanoid secretion	0/32	1/10157	1	9	0	1
GO:1903352	BP	p	L-ornithine transmembrane transport	0/32	3/10157	1	11	0	1
GO:0042137	BP	p	sequestering of neurotransmitter	0/32	1/10157	1	4	0	1
GO:1904885	BP	p	beta-catenin destruction complex assembly	0/32	2/10157	1	6	0	1
GO:0009158	BP	p	ribonucleoside monophosphate catabolic process	0/32	2/10157	1	9	0	1
GO:0002190	BP	p	cap-independent translational initiation	0/32	1/10157	1	5	0	1
GO:0042595	BP	p	behavioral response to starvation	0/32	4/10157	1	6	0	1
GO:0061537	BP	p	glycine secretion, neurotransmission	0/32	1/10157	1	12	0	1
GO:0090114	BP	p	COPII-coated vesicle budding	0/32	3/10157	1	8	0	1
GO:0007541	BP	p	sex determination, primary response to X:A ratio	0/32	1/10157	1	3	0	1
GO:0002792	BP	p	negative regulation of peptide secretion	0/32	25/10157	1	7	0	1
GO:0045843	BP	p	negative regulation of striated muscle tissue development	0/32	12/10157	1	7	0	1
GO:0090179	BP	p	planar cell polarity pathway involved in neural tube closure	0/32	2/10157	1	10	0	1
GO:1990575	BP	p	mitochondrial L-ornithine transmembrane transport	0/32	2/10157	1	12	0	1
GO:0052433	BP	p	modulation by organism of apoptotic process in other organism involved in symbiotic interaction	0/32	2/10157	1	8	0	1
GO:0035810	BP	p	positive regulation of urine volume	0/32	2/10157	1	5	0	1
GO:0006021	BP	p	inositol biosynthetic process	0/32	2/10157	1	7	0	1
GO:0048469	BP	p	cell maturation	0/32	35/10157	1	4	0	1
GO:0006272	BP	p	leading strand elongation	0/32	4/10157	1	9	0	1
GO:1902749	BP	p	regulation of cell cycle G2/M phase transition	0/32	46/10157	1	7	0	1
GO:0007448	BP	p	anterior/posterior pattern specification, imaginal disc	0/32	15/10157	1	5	0	1
GO:0061511	BP	p	centriole elongation	0/32	1/10157	1	3	0	1
GO:0070235	BP	p	regulation of activation-induced cell death of T cells	0/32	1/10157	1	10	0	1
GO:0070200	BP	p	establishment of protein localization to telomere	0/32	2/10157	1	8	0	1
GO:0042666	BP	p	negative regulation of ectodermal cell fate specification	0/32	1/10157	1	8	0	1
GO:0019221	BP	p	cytokine-mediated signaling pathway	0/32	28/10157	1	6	0	1
GO:0006482	BP	p	protein demethylation	0/32	38/10157	1	8	0	1
GO:0003180	BP	p	aortic valve morphogenesis	0/32	6/10157	1	4	0	1
GO:2000573	BP	p	positive regulation of DNA biosynthetic process	0/32	21/10157	1	8	0	1
GO:0007163	BP	p	establishment or maintenance of cell polarity	0/32	138/10157	1	2	0	1
GO:0006533	BP	p	aspartate catabolic process	0/32	2/10157	1	10	0	1
GO:0090152	BP	p	establishment of protein localization to mitochondrial membrane involved in mitochondrial fission	0/32	1/10157	1	9	0	1
GO:0043050	BP	p	pharyngeal pumping	0/32	1/10157	1	4	0	1
GO:0035116	BP	p	embryonic hindlimb morphogenesis	0/32	2/10157	1	6	0	1
GO:0016318	BP	p	ommatidial rotation	0/32	16/10157	1	3	0	1
GO:1903513	BP	p	endoplasmic reticulum to cytosol transport	0/32	8/10157	1	5	0	1
GO:1903423	BP	p	positive regulation of synaptic vesicle recycling	0/32	4/10157	1	8	0	1
GO:0045977	BP	p	positive regulation of mitotic cell cycle, embryonic	0/32	2/10157	1	7	0	1
GO:0006778	BP	p	porphyrin-containing compound metabolic process	0/32	22/10157	1	5	0	1
GO:0060628	BP	p	regulation of ER to Golgi vesicle-mediated transport	0/32	9/10157	1	6	0	1
GO:0090407	BP	p	organophosphate biosynthetic process	0/32	250/10157	1	5	0	1
GO:0036065	BP	p	fucosylation	0/32	8/10157	1	3	0	1
GO:0061059	BP	p	positive regulation of peptidoglycan recognition protein signaling pathway	0/32	1/10157	1	8	0	1
GO:0051904	BP	p	pigment granule transport	0/32	10/10157	1	7	0	1
GO:0055088	BP	p	lipid homeostasis	0/32	55/10157	1	5	0	1
GO:0045778	BP	p	positive regulation of ossification	0/32	17/10157	1	5	0	1
GO:0071545	BP	p	inositol phosphate catabolic process	0/32	7/10157	1	7	0	1
GO:0000916	BP	p	actomyosin contractile ring contraction	0/32	2/10157	1	5	0	1
GO:0097210	BP	p	response to gonadotropin-releasing hormone	0/32	1/10157	1	7	0	1
GO:1903405	BP	p	protein localization to nuclear body	0/32	1/10157	1	8	0	1
GO:0002323	BP	p	natural killer cell activation involved in immune response	0/32	2/10157	1	6	0	1
GO:0007450	BP	p	dorsal/ventral pattern formation, imaginal disc	0/32	24/10157	1	5	0	1
GO:1901071	BP	p	glucosamine-containing compound metabolic process	0/32	41/10157	1	5	0	1
GO:0045200	BP	p	establishment of neuroblast polarity	0/32	7/10157	1	4	0	1
GO:0021898	BP	p	commitment of multipotent stem cells to neuronal lineage in forebrain	0/32	1/10157	1	6	0	1
GO:0097117	BP	p	guanylate kinase-associated protein clustering	0/32	1/10157	1	6	0	1
GO:1902407	BP	p	assembly of actomyosin apparatus involved in mitotic cytokinesis	0/32	1/10157	1	6	0	1
GO:0003206	BP	p	cardiac chamber morphogenesis	0/32	4/10157	1	3	0	1
GO:0034103	BP	p	regulation of tissue remodeling	0/32	7/10157	1	4	0	1
GO:0042214	BP	p	terpene metabolic process	0/32	1/10157	1	6	0	1
GO:1904289	BP	p	regulation of mitotic DNA damage checkpoint	0/32	1/10157	1	8	0	1
GO:0035306	BP	p	positive regulation of dephosphorylation	0/32	11/10157	1	8	0	1
GO:1903674	BP	p	regulation of cap-dependent translational initiation	0/32	1/10157	1	10	0	1
GO:0044000	BP	p	movement in host	0/32	1/10157	1	5	0	1
GO:0035511	BP	p	oxidative DNA demethylation	0/32	4/10157	1	10	0	1
GO:0046548	BP	p	retinal rod cell development	0/32	3/10157	1	7	0	1
GO:0035264	BP	p	multicellular organism growth	0/32	33/10157	1	3	0	1
GO:0010962	BP	p	regulation of glucan biosynthetic process	0/32	5/10157	1	8	0	1
GO:1905606	BP	p	regulation of presynapse assembly	0/32	3/10157	1	7	0	1
GO:0018406	BP	p	protein C-linked glycosylation via 2'-alpha-mannosyl-L-tryptophan	0/32	1/10157	1	10	0	1
GO:1904504	BP	p	positive regulation of lipophagy	0/32	2/10157	1	9	0	1
GO:1903438	BP	p	positive regulation of mitotic cytokinetic process	0/32	3/10157	1	9	0	1
GO:0002700	BP	p	regulation of production of molecular mediator of immune response	0/32	62/10157	1	5	0	1
GO:0140238	BP	p	presynaptic endocytosis	0/32	31/10157	1	6	0	1
GO:0043433	BP	p	negative regulation of DNA-binding transcription factor activity	0/32	32/10157	1	11	0	1
GO:0007063	BP	p	regulation of sister chromatid cohesion	0/32	8/10157	1	8	0	1
GO:0006660	BP	p	phosphatidylserine catabolic process	0/32	2/10157	1	8	0	1
GO:1903689	BP	p	regulation of wound healing, spreading of epidermal cells	0/32	1/10157	1	7	0	1
GO:0070407	BP	p	oxidation-dependent protein catabolic process	0/32	1/10157	1	8	0	1
GO:0002119	BP	p	nematode larval development	0/32	13/10157	1	5	0	1
GO:0018199	BP	p	peptidyl-glutamine modification	0/32	1/10157	1	8	0	1
GO:0050931	BP	p	pigment cell differentiation	0/32	11/10157	1	4	0	1
GO:0032653	BP	p	regulation of interleukin-10 production	0/32	3/10157	1	5	0	1
GO:0050789	BP	p	regulation of biological process	13/32	4177/10157	1	2	13	1	Ppup006060.1, Ppup006550.1, Ppup008700.1, Ppup010390.1, Ppup019220.1, Ppup060190.1, Ppup124350.1, Ppup133780.1, Ppup133960.1, Ppup139080.1, Ppup140770.1, Ppup154760.1, Ppup160680.1
GO:0034354	BP	p	'de novo' NAD biosynthetic process from tryptophan	0/32	2/10157	1	13	0	1
GO:0035860	BP	p	glial cell-derived neurotrophic factor receptor signaling pathway	0/32	2/10157	1	8	0	1
GO:0009141	BP	p	nucleoside triphosphate metabolic process	0/32	43/10157	1	7	0	1
GO:0015709	BP	p	thiosulfate transport	0/32	2/10157	1	7	0	1
GO:0044257	BP	p	cellular protein catabolic process	0/32	9/10157	1	6	0	1
GO:0007464	BP	p	R3/R4 cell fate commitment	0/32	35/10157	1	8	0	1
GO:0036250	BP	p	peroxisome transport along microtubule	0/32	1/10157	1	8	0	1
GO:0070192	BP	p	chromosome organization involved in meiotic cell cycle	0/32	22/10157	1	6	0	1
GO:1903593	BP	p	regulation of histamine secretion by mast cell	0/32	2/10157	1	11	0	1
GO:1904589	BP	p	regulation of protein import	0/32	36/10157	1	7	0	1
GO:0006309	BP	p	apoptotic DNA fragmentation	0/32	7/10157	1	9	0	1
GO:0071679	BP	p	commissural neuron axon guidance	0/32	1/10157	1	5	0	1
GO:0036298	BP	p	recombinational interstrand cross-link repair	0/32	1/10157	1	9	0	1
GO:0010883	BP	p	regulation of lipid storage	0/32	34/10157	1	5	0	1
GO:0060620	BP	p	regulation of cholesterol import	0/32	1/10157	1	8	0	1
GO:0042129	BP	p	regulation of T cell proliferation	0/32	9/10157	1	8	0	1
GO:0060341	BP	p	regulation of cellular localization	1/32	349/10157	1	4	1	1	Ppup133960.1
GO:0032328	BP	p	alanine transport	0/32	3/10157	1	10	0	1
GO:0099504	BP	p	synaptic vesicle cycle	0/32	4/10157	1	6	0	1
GO:0070571	BP	p	negative regulation of neuron projection regeneration	0/32	2/10157	1	10	0	1
GO:0052697	BP	p	xenobiotic glucuronidation	0/32	1/10157	1	10	0	1
GO:0031341	BP	p	regulation of cell killing	0/32	7/10157	1	4	0	1
GO:0032202	BP	p	telomere assembly	0/32	1/10157	1	7	0	1
GO:0045433	BP	p	male courtship behavior, veined wing generated song production	0/32	11/10157	1	7	0	1
GO:0035277	BP	p	spiracle morphogenesis, open tracheal system	0/32	15/10157	1	3	0	1
GO:0042395	BP	p	ecdysis, collagen and cuticulin-based cuticle	0/32	2/10157	1	3	0	1
GO:0006728	BP	p	pteridine biosynthetic process	0/32	4/10157	1	6	0	1
GO:0030301	BP	p	cholesterol transport	0/32	32/10157	1	7	0	1
GO:0051409	BP	p	response to nitrosative stress	0/32	3/10157	1	3	0	1
GO:0046033	BP	p	AMP metabolic process	0/32	13/10157	1	10	0	1
GO:0034127	BP	p	regulation of MyD88-independent toll-like receptor signaling pathway	0/32	1/10157	1	8	0	1
GO:0030860	BP	p	regulation of polarized epithelial cell differentiation	0/32	1/10157	1	6	0	1
GO:0072178	BP	p	nephric duct morphogenesis	0/32	2/10157	1	6	0	1
GO:0070940	BP	p	dephosphorylation of RNA polymerase II C-terminal domain	0/32	4/10157	1	11	0	1
GO:0007460	BP	p	R8 cell fate commitment	0/32	1/10157	1	8	0	1
GO:0030703	BP	p	eggshell formation	0/32	11/10157	1	3	0	1
GO:0006097	BP	p	glyoxylate cycle	0/32	2/10157	1	8	0	1
GO:0038096	BP	p	Fc-gamma receptor signaling pathway involved in phagocytosis	0/32	4/10157	1	10	0	1
GO:0033047	BP	p	regulation of mitotic sister chromatid segregation	0/32	62/10157	1	8	0	1
GO:0032187	BP	p	actomyosin contractile ring localization	0/32	2/10157	1	5	0	1
GO:2000847	BP	p	negative regulation of corticosteroid hormone secretion	0/32	2/10157	1	10	0	1
GO:0072752	BP	p	cellular response to rapamycin	0/32	1/10157	1	6	0	1
GO:0030218	BP	p	erythrocyte differentiation	0/32	11/10157	1	5	0	1
GO:2001224	BP	p	positive regulation of neuron migration	0/32	5/10157	1	8	0	1
GO:0031915	BP	p	positive regulation of synaptic plasticity	0/32	5/10157	1	8	0	1
GO:0044728	BP	p	DNA methylation or demethylation	0/32	19/10157	1	8	0	1
GO:1900102	BP	p	negative regulation of endoplasmic reticulum unfolded protein response	0/32	2/10157	1	8	0	1
GO:0072197	BP	p	ureter morphogenesis	0/32	1/10157	1	4	0	1
GO:0043615	BP	p	astrocyte cell migration	0/32	2/10157	1	6	0	1
GO:0014059	BP	p	regulation of dopamine secretion	0/32	7/10157	1	8	0	1
GO:0043627	BP	p	response to estrogen	0/32	11/10157	1	2	0	1
GO:0007616	BP	p	long-term memory	0/32	41/10157	1	7	0	1
GO:0001514	BP	p	selenocysteine incorporation	0/32	2/10157	1	9	0	1
GO:0097009	BP	p	energy homeostasis	0/32	7/10157	1	5	0	1
GO:0098586	BP	p	cellular response to virus	0/32	10/10157	1	6	0	1
GO:0010565	BP	p	regulation of cellular ketone metabolic process	0/32	28/10157	1	5	0	1
GO:0006624	BP	p	vacuolar protein processing	0/32	2/10157	1	7	0	1
GO:0006436	BP	p	tryptophanyl-tRNA aminoacylation	0/32	2/10157	1	11	0	1
GO:0051225	BP	p	spindle assembly	0/32	42/10157	1	8	0	1
GO:0038095	BP	p	Fc-epsilon receptor signaling pathway	0/32	10/10157	1	8	0	1
GO:0051572	BP	p	negative regulation of histone H3-K4 methylation	0/32	3/10157	1	11	0	1
GO:0006586	BP	p	indolalkylamine metabolic process	0/32	11/10157	1	7	0	1
GO:0070836	BP	p	caveola assembly	0/32	1/10157	1	8	0	1
GO:0010229	BP	p	inflorescence development	0/32	1/10157	1	6	0	1
GO:1902656	BP	p	calcium ion import into cytosol	0/32	4/10157	1	13	0	1
GO:0030643	BP	p	cellular phosphate ion homeostasis	0/32	1/10157	1	9	0	1
GO:2000588	BP	p	positive regulation of platelet-derived growth factor receptor-beta signaling pathway	0/32	1/10157	1	8	0	1
GO:0046148	BP	p	pigment biosynthetic process	0/32	58/10157	1	3	0	1
GO:0035141	BP	p	medial fin morphogenesis	0/32	1/10157	1	5	0	1
GO:0046502	BP	p	uroporphyrinogen III metabolic process	0/32	1/10157	1	6	0	1
GO:0006672	BP	p	ceramide metabolic process	0/32	30/10157	1	7	0	1
GO:0060368	BP	p	regulation of Fc receptor mediated stimulatory signaling pathway	0/32	1/10157	1	6	0	1
GO:0009217	BP	p	purine deoxyribonucleoside triphosphate catabolic process	0/32	1/10157	1	10	0	1
GO:2000106	BP	p	regulation of leukocyte apoptotic process	0/32	2/10157	1	7	0	1
GO:0031000	BP	p	response to caffeine	0/32	6/10157	1	6	0	1
GO:0046596	BP	p	regulation of viral entry into host cell	0/32	3/10157	1	6	0	1
GO:0048747	BP	p	muscle fiber development	0/32	17/10157	1	6	0	1
GO:2000609	BP	p	regulation of thyroid hormone generation	0/32	1/10157	1	5	0	1
GO:0006611	BP	p	protein export from nucleus	0/32	23/10157	1	9	0	1
GO:0043434	BP	p	response to peptide hormone	0/32	75/10157	1	6	0	1
GO:0072173	BP	p	metanephric tubule morphogenesis	0/32	2/10157	1	6	0	1
GO:0120142	BP	p	positive regulation of ecdysone receptor-mediated signaling pathway	0/32	1/10157	1	8	0	1
GO:0090197	BP	p	positive regulation of chemokine secretion	0/32	5/10157	1	10	0	1
GO:0006337	BP	p	nucleosome disassembly	0/32	7/10157	1	7	0	1
GO:0050807	BP	p	regulation of synapse organization	0/32	104/10157	1	5	0	1
GO:1902337	BP	p	regulation of apoptotic process involved in morphogenesis	0/32	2/10157	1	8	0	1
GO:0072477	BP	p	signal transduction involved in mitotic spindle checkpoint	0/32	1/10157	1	8	0	1
GO:0051170	BP	p	import into nucleus	0/32	47/10157	1	7	0	1
GO:0061058	BP	p	regulation of peptidoglycan recognition protein signaling pathway	0/32	1/10157	1	7	0	1
GO:0150011	BP	p	regulation of neuron projection arborization	0/32	3/10157	1	9	0	1
GO:0035469	BP	p	determination of pancreatic left/right asymmetry	0/32	3/10157	1	6	0	1
GO:0007228	BP	p	positive regulation of hh target transcription factor activity	0/32	1/10157	1	12	0	1
GO:0048754	BP	p	branching morphogenesis of an epithelial tube	0/32	48/10157	1	6	0	1
GO:1902667	BP	p	regulation of axon guidance	0/32	27/10157	1	10	0	1
GO:0034219	BP	p	carbohydrate transmembrane transport	0/32	6/10157	1	6	0	1
GO:0039003	BP	p	pronephric field specification	0/32	1/10157	1	6	0	1
GO:0030900	BP	p	forebrain development	0/32	17/10157	1	3	0	1
GO:0046967	BP	p	cytosol to endoplasmic reticulum transport	0/32	1/10157	1	5	0	1
GO:0090277	BP	p	positive regulation of peptide hormone secretion	0/32	19/10157	1	9	0	1
GO:0090202	BP	p	gene looping	0/32	3/10157	1	7	0	1
GO:0010447	BP	p	response to acidic pH	0/32	2/10157	1	4	0	1
GO:0019365	BP	p	pyridine nucleotide salvage	0/32	3/10157	1	10	0	1
GO:0007271	BP	p	synaptic transmission, cholinergic	0/32	12/10157	1	8	0	1
GO:0045324	BP	p	late endosome to vacuole transport	0/32	12/10157	1	5	0	1
GO:0090071	BP	p	negative regulation of ribosome biogenesis	0/32	3/10157	1	6	0	1
GO:0051353	BP	p	positive regulation of oxidoreductase activity	0/32	9/10157	1	5	0	1
GO:0032435	BP	p	negative regulation of proteasomal ubiquitin-dependent protein catabolic process	0/32	14/10157	1	11	0	1
GO:0071774	BP	p	response to fibroblast growth factor	0/32	5/10157	1	5	0	1
GO:0051097	BP	p	negative regulation of helicase activity	0/32	1/10157	1	7	0	1
GO:0045451	BP	p	pole plasm oskar mRNA localization	0/32	12/10157	1	8	0	1
GO:0006107	BP	p	oxaloacetate metabolic process	0/32	5/10157	1	7	0	1
GO:0046959	BP	p	habituation	0/32	5/10157	1	8	0	1
GO:1904491	BP	p	protein localization to ciliary transition zone	0/32	2/10157	1	7	0	1
GO:0044091	BP	p	membrane biogenesis	0/32	11/10157	1	4	0	1
GO:0032261	BP	p	purine nucleotide salvage	0/32	5/10157	1	10	0	1
GO:0009227	BP	p	nucleotide-sugar catabolic process	0/32	2/10157	1	7	0	1
GO:0007270	BP	p	neuron-neuron synaptic transmission	0/32	2/10157	1	8	0	1
GO:0072001	BP	p	renal system development	0/32	2/10157	1	4	0	1
GO:0042044	BP	p	fluid transport	0/32	28/10157	1	4	0	1
GO:0010636	BP	p	positive regulation of mitochondrial fusion	0/32	1/10157	1	8	0	1
GO:0030201	BP	p	heparan sulfate proteoglycan metabolic process	0/32	18/10157	1	7	0	1
GO:0006797	BP	p	polyphosphate metabolic process	0/32	1/10157	1	5	0	1
GO:1900409	BP	p	positive regulation of cellular response to oxidative stress	0/32	2/10157	1	7	0	1
GO:0044837	BP	p	actomyosin contractile ring organization	0/32	10/10157	1	8	0	1
GO:0051220	BP	p	cytoplasmic sequestering of protein	0/32	11/10157	1	5	0	1
GO:0043695	BP	p	detection of pheromone	0/32	1/10157	1	5	0	1
GO:1903722	BP	p	regulation of centriole elongation	0/32	4/10157	1	11	0	1
GO:0071345	BP	p	cellular response to cytokine stimulus	0/32	74/10157	1	5	0	1
GO:0001916	BP	p	positive regulation of T cell mediated cytotoxicity	0/32	3/10157	1	9	0	1
GO:0006356	BP	p	regulation of transcription by RNA polymerase I	0/32	12/10157	1	10	0	1
GO:0072224	BP	p	metanephric glomerulus development	0/32	2/10157	1	4	0	1
GO:0016543	BP	p	male courtship behavior, orientation prior to leg tapping and wing vibration	0/32	5/10157	1	7	0	1
GO:0042168	BP	p	heme metabolic process	0/32	16/10157	1	6	0	1
GO:0019452	BP	p	L-cysteine catabolic process to taurine	0/32	1/10157	1	12	0	1
GO:0019800	BP	p	peptide cross-linking via chondroitin 4-sulfate glycosaminoglycan	0/32	1/10157	1	9	0	1
GO:0000388	BP	p	spliceosome conformational change to release U4 (or U4atac) and U1 (or U11)	0/32	1/10157	1	8	0	1
GO:0019516	BP	p	lactate oxidation	0/32	1/10157	1	8	0	1
GO:0044648	BP	p	histone H3-K4 dimethylation	0/32	1/10157	1	12	0	1
GO:0032677	BP	p	regulation of interleukin-8 production	0/32	3/10157	1	5	0	1
GO:0036315	BP	p	cellular response to sterol	0/32	4/10157	1	6	0	1
GO:0001960	BP	p	negative regulation of cytokine-mediated signaling pathway	0/32	12/10157	1	7	0	1
GO:0010738	BP	p	regulation of protein kinase A signaling	0/32	3/10157	1	7	0	1
GO:1904262	BP	p	negative regulation of TORC1 signaling	0/32	13/10157	1	9	0	1
GO:0045456	BP	p	ecdysteroid biosynthetic process	0/32	12/10157	1	7	0	1
GO:0048384	BP	p	retinoic acid receptor signaling pathway	0/32	1/10157	1	6	0	1
GO:2000125	BP	p	regulation of octopamine or tyramine signaling pathway	0/32	1/10157	1	7	0	1
GO:0051898	BP	p	negative regulation of protein kinase B signaling	0/32	4/10157	1	8	0	1
GO:0021537	BP	p	telencephalon development	0/32	9/10157	1	3	0	1
GO:0062100	BP	p	positive regulation of programmed necrotic cell death	0/32	1/10157	1	7	0	1
GO:0008016	BP	p	regulation of heart contraction	0/32	45/10157	1	6	0	1
GO:0097264	BP	p	self proteolysis	0/32	2/10157	1	6	0	1
GO:1902106	BP	p	negative regulation of leukocyte differentiation	0/32	15/10157	1	7	0	1
GO:0097155	BP	p	fasciculation of sensory neuron axon	0/32	2/10157	1	9	0	1
GO:0045623	BP	p	negative regulation of T-helper cell differentiation	0/32	4/10157	1	12	0	1
GO:0070233	BP	p	negative regulation of T cell apoptotic process	0/32	1/10157	1	10	0	1
GO:0042303	BP	p	molting cycle	0/32	4/10157	1	2	0	1
GO:1903742	BP	p	regulation of anterograde synaptic vesicle transport	0/32	1/10157	1	8	0	1
GO:0007197	BP	p	adenylate cyclase-inhibiting G protein-coupled acetylcholine receptor signaling pathway	0/32	1/10157	1	9	0	1
GO:0030534	BP	p	adult behavior	0/32	101/10157	1	2	0	1
GO:0034499	BP	p	late endosome to Golgi transport	0/32	1/10157	1	7	0	1
GO:0009311	BP	p	oligosaccharide metabolic process	0/32	19/10157	1	4	0	1
GO:0046854	BP	p	phosphatidylinositol phosphorylation	0/32	14/10157	1	8	0	1
GO:0031579	BP	p	membrane raft organization	0/32	2/10157	1	5	0	1
GO:1905775	BP	p	negative regulation of DNA helicase activity	0/32	1/10157	1	9	0	1
GO:1903690	BP	p	negative regulation of wound healing, spreading of epidermal cells	0/32	1/10157	1	8	0	1
GO:0031990	BP	p	mRNA export from nucleus in response to heat stress	0/32	3/10157	1	10	0	1
GO:1901673	BP	p	regulation of mitotic spindle assembly	0/32	11/10157	1	10	0	1
GO:2000323	BP	p	negative regulation of glucocorticoid receptor signaling pathway	0/32	2/10157	1	8	0	1
GO:0035376	BP	p	sterol import	0/32	4/10157	1	7	0	1
GO:2000269	BP	p	regulation of fibroblast apoptotic process	0/32	2/10157	1	7	0	1
GO:0033013	BP	p	tetrapyrrole metabolic process	0/32	27/10157	1	4	0	1
GO:0052330	BP	p	positive regulation by organism of programmed cell death in other organism involved in symbiotic interaction	0/32	1/10157	1	8	0	1
GO:2000975	BP	p	positive regulation of pro-B cell differentiation	0/32	1/10157	1	9	0	1
GO:0033144	BP	p	negative regulation of intracellular steroid hormone receptor signaling pathway	0/32	9/10157	1	7	0	1
GO:0007487	BP	p	analia development	0/32	4/10157	1	3	0	1
GO:1903892	BP	p	negative regulation of ATF6-mediated unfolded protein response	0/32	1/10157	1	9	0	1
GO:0007127	BP	p	meiosis I	0/32	12/10157	1	8	0	1
GO:1990036	BP	p	calcium ion import into sarcoplasmic reticulum	0/32	1/10157	1	10	0	1
GO:0045776	BP	p	negative regulation of blood pressure	0/32	5/10157	1	4	0	1
GO:0038168	BP	p	epidermal growth factor receptor signaling pathway via I-kappaB kinase/NF-kappaB cascade	0/32	1/10157	1	11	0	1
GO:0042471	BP	p	ear morphogenesis	0/32	3/10157	1	5	0	1
GO:0022606	BP	p	establishment of proximal/distal cell polarity	0/32	1/10157	1	5	0	1
GO:0051303	BP	p	establishment of chromosome localization	0/32	26/10157	1	5	0	1
GO:0032667	BP	p	regulation of interleukin-23 production	0/32	1/10157	1	5	0	1
GO:1900016	BP	p	negative regulation of cytokine production involved in inflammatory response	0/32	6/10157	1	8	0	1
GO:0071569	BP	p	protein ufmylation	0/32	1/10157	1	9	0	1
GO:0009062	BP	p	fatty acid catabolic process	0/32	50/10157	1	8	0	1
GO:0051823	BP	p	regulation of synapse structural plasticity	0/32	1/10157	1	6	0	1
GO:0017004	BP	p	cytochrome complex assembly	0/32	16/10157	1	7	0	1
GO:0045540	BP	p	regulation of cholesterol biosynthetic process	0/32	12/10157	1	9	0	1
GO:0010862	BP	p	positive regulation of pathway-restricted SMAD protein phosphorylation	0/32	2/10157	1	10	0	1
GO:0071267	BP	p	L-methionine salvage	0/32	5/10157	1	12	0	1
GO:0006379	BP	p	mRNA cleavage	0/32	24/10157	1	8	0	1
GO:0001680	BP	p	tRNA 3'-terminal CCA addition	0/32	1/10157	1	11	0	1
GO:0008218	BP	p	bioluminescence	0/32	9/10157	1	3	0	1
GO:0032956	BP	p	regulation of actin cytoskeleton organization	0/32	112/10157	1	7	0	1
GO:0072282	BP	p	metanephric nephron tubule morphogenesis	0/32	2/10157	1	8	0	1
GO:1904983	BP	p	glycine import into mitochondrion	0/32	1/10157	1	11	0	1
GO:0046834	BP	p	lipid phosphorylation	0/32	19/10157	1	6	0	1
GO:1905618	BP	p	positive regulation of miRNA mediated inhibition of translation	0/32	2/10157	1	10	0	1
GO:0006354	BP	p	DNA-templated transcription, elongation	0/32	49/10157	1	8	0	1
GO:0051086	BP	p	chaperone mediated protein folding independent of cofactor	0/32	1/10157	1	5	0	1
GO:0018103	BP	p	protein C-linked glycosylation	0/32	1/10157	1	8	0	1
GO:0030216	BP	p	keratinocyte differentiation	0/32	6/10157	1	6	0	1
GO:0035909	BP	p	aorta morphogenesis	0/32	8/10157	1	6	0	1
GO:0018065	BP	p	protein-cofactor linkage	0/32	9/10157	1	7	0	1
GO:0006402	BP	p	mRNA catabolic process	0/32	83/10157	1	8	0	1
GO:0046626	BP	p	regulation of insulin receptor signaling pathway	0/32	29/10157	1	6	0	1
GO:0060999	BP	p	positive regulation of dendritic spine development	0/32	12/10157	1	11	0	1
GO:0021879	BP	p	forebrain neuron differentiation	0/32	3/10157	1	6	0	1
GO:0035113	BP	p	embryonic appendage morphogenesis	0/32	12/10157	1	4	0	1
GO:0032506	BP	p	cytokinetic process	0/32	20/10157	1	3	0	1
GO:0099003	BP	p	vesicle-mediated transport in synapse	0/32	54/10157	1	5	0	1
GO:0001711	BP	p	endodermal cell fate commitment	0/32	4/10157	1	5	0	1
GO:0150117	BP	p	positive regulation of cell-substrate junction organization	0/32	7/10157	1	6	0	1
GO:0036498	BP	p	IRE1-mediated unfolded protein response	0/32	6/10157	1	6	0	1
GO:0035036	BP	p	sperm-egg recognition	0/32	7/10157	1	4	0	1
GO:0072338	BP	p	cellular lactam metabolic process	0/32	1/10157	1	5	0	1
GO:0051066	BP	p	dihydrobiopterin metabolic process	0/32	1/10157	1	5	0	1
GO:0071346	BP	p	cellular response to interferon-gamma	0/32	7/10157	1	6	0	1
GO:0070433	BP	p	negative regulation of nucleotide-binding oligomerization domain containing 2 signaling pathway	0/32	1/10157	1	9	0	1
GO:0030520	BP	p	intracellular estrogen receptor signaling pathway	0/32	4/10157	1	8	0	1
GO:0061026	BP	p	cardiac muscle tissue regeneration	0/32	2/10157	1	5	0	1
GO:0000492	BP	p	box C/D snoRNP assembly	0/32	3/10157	1	9	0	1
GO:2000197	BP	p	regulation of ribonucleoprotein complex localization	0/32	6/10157	1	5	0	1
GO:2000353	BP	p	positive regulation of endothelial cell apoptotic process	0/32	2/10157	1	9	0	1
GO:0006450	BP	p	regulation of translational fidelity	0/32	4/10157	1	3	0	1
GO:0035099	BP	p	hemocyte migration	0/32	12/10157	1	5	0	1
GO:0002366	BP	p	leukocyte activation involved in immune response	0/32	60/10157	1	4	0	1
GO:0097370	BP	p	protein O-GlcNAcylation via threonine	0/32	1/10157	1	10	0	1
GO:0007370	BP	p	ventral furrow formation	0/32	11/10157	1	3	0	1
GO:0030258	BP	p	lipid modification	0/32	80/10157	1	5	0	1
GO:0051250	BP	p	negative regulation of lymphocyte activation	0/32	19/10157	1	7	0	1
GO:0038065	BP	p	collagen-activated signaling pathway	0/32	4/10157	1	6	0	1
GO:2000790	BP	p	regulation of mesenchymal cell proliferation involved in lung development	0/32	1/10157	1	6	0	1
GO:0007629	BP	p	flight behavior	0/32	9/10157	1	4	0	1
GO:0098969	BP	p	neurotransmitter receptor transport to postsynaptic membrane	0/32	5/10157	1	10	0	1
GO:0010644	BP	p	cell communication by electrical coupling	0/32	3/10157	1	3	0	1
GO:0035305	BP	p	negative regulation of dephosphorylation	0/32	32/10157	1	8	0	1
GO:0008654	BP	p	phospholipid biosynthetic process	0/32	99/10157	1	6	0	1
GO:0042327	BP	p	positive regulation of phosphorylation	0/32	224/10157	1	8	0	1
GO:0007019	BP	p	microtubule depolymerization	0/32	10/10157	1	8	0	1
GO:0046323	BP	p	glucose import	0/32	1/10157	1	10	0	1
GO:0009071	BP	p	serine family amino acid catabolic process	0/32	11/10157	1	9	0	1
GO:0035025	BP	p	positive regulation of Rho protein signal transduction	0/32	3/10157	1	10	0	1
GO:0055075	BP	p	potassium ion homeostasis	0/32	6/10157	1	8	0	1
GO:0010876	BP	p	lipid localization	0/32	1/10157	1	3	0	1
GO:2000586	BP	p	regulation of platelet-derived growth factor receptor-beta signaling pathway	0/32	1/10157	1	7	0	1
GO:0035090	BP	p	maintenance of apical/basal cell polarity	0/32	21/10157	1	5	0	1
GO:0035281	BP	p	pre-miRNA export from nucleus	0/32	1/10157	1	9	0	1
GO:0051000	BP	p	positive regulation of nitric-oxide synthase activity	0/32	5/10157	1	7	0	1
GO:0031099	BP	p	regeneration	0/32	38/10157	1	3	0	1
GO:0002890	BP	p	negative regulation of immunoglobulin mediated immune response	0/32	1/10157	1	9	0	1
GO:0006479	BP	p	protein methylation	0/32	74/10157	1	8	0	1
GO:2001153	BP	p	positive regulation of renal water transport	0/32	1/10157	1	7	0	1
GO:0071106	BP	p	adenosine 3',5'-bisphosphate transmembrane transport	0/32	1/10157	1	9	0	1
GO:0032241	BP	p	positive regulation of nucleobase-containing compound transport	0/32	5/10157	1	6	0	1
GO:0006562	BP	p	proline catabolic process	0/32	3/10157	1	10	0	1
GO:0140353	BP	p	lipid export from cell	0/32	9/10157	1	6	0	1
GO:1903804	BP	p	glycine import across plasma membrane	0/32	2/10157	1	11	0	1
GO:0046668	BP	p	regulation of retinal cell programmed cell death	0/32	9/10157	1	6	0	1
GO:0072017	BP	p	distal tubule development	0/32	1/10157	1	8	0	1
GO:0015844	BP	p	monoamine transport	0/32	5/10157	1	5	0	1
GO:0009851	BP	p	auxin biosynthetic process	0/32	1/10157	1	6	0	1
GO:1902570	BP	p	protein localization to nucleolus	0/32	1/10157	1	7	0	1
GO:0036302	BP	p	atrioventricular canal development	0/32	4/10157	1	3	0	1
GO:0032648	BP	p	regulation of interferon-beta production	0/32	15/10157	1	6	0	1
GO:0010863	BP	p	positive regulation of phospholipase C activity	0/32	5/10157	1	8	0	1
GO:2000707	BP	p	positive regulation of dense core granule biogenesis	0/32	1/10157	1	6	0	1
GO:0045491	BP	p	xylan metabolic process	0/32	1/10157	1	8	0	1
GO:0055014	BP	p	atrial cardiac muscle cell development	0/32	1/10157	1	7	0	1
GO:1905920	BP	p	positive regulation of CoA-transferase activity	0/32	2/10157	1	6	0	1
GO:0018872	BP	p	arsonoacetate metabolic process	0/32	1/10157	1	7	0	1
GO:0043504	BP	p	mitochondrial DNA repair	0/32	2/10157	1	8	0	1
GO:0098887	BP	p	neurotransmitter receptor transport, endosome to postsynaptic membrane	0/32	4/10157	1	11	0	1
GO:0046049	BP	p	UMP metabolic process	0/32	8/10157	1	10	0	1
GO:1904292	BP	p	regulation of ERAD pathway	0/32	13/10157	1	10	0	1
GO:0060969	BP	p	negative regulation of gene silencing	0/32	20/10157	1	7	0	1
GO:2000791	BP	p	negative regulation of mesenchymal cell proliferation involved in lung development	0/32	1/10157	1	7	0	1
GO:0009630	BP	p	gravitropism	0/32	1/10157	1	4	0	1
GO:0034454	BP	p	microtubule anchoring at centrosome	0/32	9/10157	1	9	0	1
GO:0051983	BP	p	regulation of chromosome segregation	0/32	71/10157	1	4	0	1
GO:0072505	BP	p	divalent inorganic anion homeostasis	0/32	1/10157	1	7	0	1
GO:0072576	BP	p	liver morphogenesis	0/32	2/10157	1	5	0	1
GO:0008614	BP	p	pyridoxine metabolic process	0/32	2/10157	1	6	0	1
GO:1900619	BP	p	acetate ester metabolic process	0/32	7/10157	1	3	0	1
GO:0051592	BP	p	response to calcium ion	0/32	26/10157	1	5	0	1
GO:0006486	BP	p	protein glycosylation	0/32	100/10157	1	7	0	1
GO:0032608	BP	p	interferon-beta production	0/32	1/10157	1	4	0	1
GO:0006188	BP	p	IMP biosynthetic process	0/32	7/10157	1	11	0	1
GO:0043122	BP	p	regulation of I-kappaB kinase/NF-kappaB signaling	0/32	36/10157	1	7	0	1
GO:0006726	BP	p	eye pigment biosynthetic process	0/32	14/10157	1	6	0	1
GO:1902287	BP	p	semaphorin-plexin signaling pathway involved in axon guidance	0/32	2/10157	1	8	0	1
GO:2000308	BP	p	negative regulation of tumor necrosis factor (ligand) superfamily member 11 production	0/32	1/10157	1	7	0	1
GO:0031104	BP	p	dendrite regeneration	0/32	1/10157	1	8	0	1
GO:0014061	BP	p	regulation of norepinephrine secretion	0/32	1/10157	1	8	0	1
GO:0071559	BP	p	response to transforming growth factor beta	0/32	7/10157	1	5	0	1
GO:0046361	BP	p	2-oxobutyrate metabolic process	0/32	1/10157	1	9	0	1
GO:0051597	BP	p	response to methylmercury	0/32	5/10157	1	4	0	1
GO:0044057	BP	p	regulation of system process	0/32	114/10157	1	4	0	1
GO:0007179	BP	p	transforming growth factor beta receptor signaling pathway	0/32	33/10157	1	8	0	1
GO:0060119	BP	p	inner ear receptor cell development	0/32	2/10157	1	5	0	1
GO:0001751	BP	p	compound eye photoreceptor cell differentiation	0/32	16/10157	1	7	0	1
GO:0043703	BP	p	photoreceptor cell fate determination	0/32	6/10157	1	5	0	1
GO:0015822	BP	p	ornithine transport	0/32	3/10157	1	9	0	1
GO:0035844	BP	p	cloaca development	0/32	1/10157	1	3	0	1
GO:0048641	BP	p	regulation of skeletal muscle tissue development	0/32	11/10157	1	7	0	1
GO:0061564	BP	p	axon development	0/32	10/10157	1	7	0	1
GO:0070425	BP	p	negative regulation of nucleotide-binding oligomerization domain containing signaling pathway	0/32	1/10157	1	8	0	1
GO:1904594	BP	p	regulation of termination of RNA polymerase II transcription	0/32	2/10157	1	11	0	1
GO:0052248	BP	p	modulation of programmed cell death in other organism involved in symbiotic interaction	0/32	2/10157	1	7	0	1
GO:0070997	BP	p	neuron death	0/32	11/10157	1	3	0	1
GO:0019442	BP	p	tryptophan catabolic process to acetyl-CoA	0/32	1/10157	1	12	0	1
GO:0060574	BP	p	intestinal epithelial cell maturation	0/32	2/10157	1	7	0	1
GO:0042447	BP	p	hormone catabolic process	0/32	4/10157	1	5	0	1
GO:0051923	BP	p	sulfation	0/32	7/10157	1	4	0	1
GO:1901741	BP	p	positive regulation of myoblast fusion	0/32	2/10157	1	9	0	1
GO:0035215	BP	p	genital disc development	0/32	5/10157	1	6	0	1
GO:0032429	BP	p	regulation of phospholipase A2 activity	0/32	3/10157	1	7	0	1
GO:0034121	BP	p	regulation of toll-like receptor signaling pathway	0/32	7/10157	1	7	0	1
GO:1903364	BP	p	positive regulation of cellular protein catabolic process	0/32	66/10157	1	8	0	1
GO:0060479	BP	p	lung cell differentiation	0/32	2/10157	1	4	0	1
GO:0006667	BP	p	sphinganine metabolic process	0/32	2/10157	1	8	0	1
GO:0045742	BP	p	positive regulation of epidermal growth factor receptor signaling pathway	0/32	7/10157	1	8	0	1
GO:0031057	BP	p	negative regulation of histone modification	0/32	27/10157	1	9	0	1
GO:0009067	BP	p	aspartate family amino acid biosynthetic process	0/32	12/10157	1	9	0	1
GO:0035568	BP	p	N-terminal peptidyl-proline methylation	0/32	1/10157	1	10	0	1
GO:0098926	BP	p	postsynaptic signal transduction	0/32	10/10157	1	5	0	1
GO:0048100	BP	p	wing disc anterior/posterior pattern formation	0/32	11/10157	1	6	0	1
GO:0045685	BP	p	regulation of glial cell differentiation	0/32	7/10157	1	8	0	1
GO:0019363	BP	p	pyridine nucleotide biosynthetic process	0/32	10/10157	1	9	0	1
GO:0018146	BP	p	keratan sulfate biosynthetic process	0/32	1/10157	1	8	0	1
GO:0035271	BP	p	ring gland development	0/32	3/10157	1	5	0	1
GO:0035095	BP	p	behavioral response to nicotine	0/32	3/10157	1	3	0	1
GO:0000070	BP	p	mitotic sister chromatid segregation	0/32	25/10157	1	7	0	1
GO:0061912	BP	p	selective autophagy	0/32	21/10157	1	6	0	1
GO:0014910	BP	p	regulation of smooth muscle cell migration	0/32	10/10157	1	7	0	1
GO:0098943	BP	p	neurotransmitter receptor transport, postsynaptic endosome to lysosome	0/32	2/10157	1	9	0	1
GO:0010955	BP	p	negative regulation of protein processing	0/32	4/10157	1	9	0	1
GO:0000082	BP	p	G1/S transition of mitotic cell cycle	0/32	25/10157	1	5	0	1
GO:0039521	BP	p	suppression by virus of host autophagy	0/32	1/10157	1	9	0	1
GO:0009213	BP	p	pyrimidine deoxyribonucleoside triphosphate catabolic process	0/32	1/10157	1	10	0	1
GO:0071581	BP	p	regulation of zinc ion transmembrane import	0/32	1/10157	1	9	0	1
GO:1904780	BP	p	negative regulation of protein localization to centrosome	0/32	1/10157	1	7	0	1
GO:0043335	BP	p	protein unfolding	0/32	1/10157	1	2	0	1
GO:0032689	BP	p	negative regulation of interferon-gamma production	0/32	3/10157	1	6	0	1
GO:0051653	BP	p	spindle localization	0/32	34/10157	1	4	0	1
GO:0019857	BP	p	5-methylcytosine metabolic process	0/32	1/10157	1	5	0	1
GO:0015812	BP	p	gamma-aminobutyric acid transport	0/32	2/10157	1	9	0	1
GO:0086010	BP	p	membrane depolarization during action potential	0/32	5/10157	1	5	0	1
GO:0050673	BP	p	epithelial cell proliferation	0/32	34/10157	1	3	0	1
GO:0033036	BP	p	macromolecule localization	2/32	919/10157	1	2	2	1	Ppup006550.1, Ppup133960.1
GO:0071800	BP	p	podosome assembly	0/32	1/10157	1	6	0	1
GO:0002223	BP	p	stimulatory C-type lectin receptor signaling pathway	0/32	11/10157	1	11	0	1
GO:0019244	BP	p	lactate biosynthetic process from pyruvate	0/32	1/10157	1	9	0	1
GO:0046066	BP	p	dGDP metabolic process	0/32	2/10157	1	11	0	1
GO:0033140	BP	p	negative regulation of peptidyl-serine phosphorylation of STAT protein	0/32	1/10157	1	11	0	1
GO:0050854	BP	p	regulation of antigen receptor-mediated signaling pathway	0/32	9/10157	1	6	0	1
GO:1905809	BP	p	negative regulation of synapse organization	0/32	18/10157	1	6	0	1
GO:0018201	BP	p	peptidyl-glycine modification	0/32	3/10157	1	8	0	1
GO:0007053	BP	p	spindle assembly involved in male meiosis	0/32	1/10157	1	10	0	1
GO:0097104	BP	p	postsynaptic membrane assembly	0/32	11/10157	1	6	0	1
GO:0018231	BP	p	peptidyl-S-diacylglycerol-L-cysteine biosynthetic process from peptidyl-cysteine	0/32	9/10157	1	9	0	1
GO:1900165	BP	p	negative regulation of interleukin-6 secretion	0/32	2/10157	1	10	0	1
GO:0009152	BP	p	purine ribonucleotide biosynthetic process	0/32	87/10157	1	10	0	1
GO:2000107	BP	p	negative regulation of leukocyte apoptotic process	0/32	1/10157	1	8	0	1
GO:0046007	BP	p	negative regulation of activated T cell proliferation	0/32	1/10157	1	10	0	1
GO:2000200	BP	p	regulation of ribosomal subunit export from nucleus	0/32	1/10157	1	9	0	1
GO:0045981	BP	p	positive regulation of nucleotide metabolic process	0/32	6/10157	1	8	0	1
GO:2000678	BP	p	negative regulation of transcription regulatory region DNA binding	0/32	4/10157	1	6	0	1
GO:0070734	BP	p	histone H3-K27 methylation	0/32	3/10157	1	11	0	1
GO:0032922	BP	p	circadian regulation of gene expression	0/32	23/10157	1	6	0	1
GO:0002790	BP	p	peptide secretion	0/32	41/10157	1	7	0	1
GO:0042755	BP	p	eating behavior	0/32	6/10157	1	3	0	1
GO:0007585	BP	p	respiratory gaseous exchange by respiratory system	0/32	7/10157	1	2	0	1
GO:0046928	BP	p	regulation of neurotransmitter secretion	0/32	42/10157	1	7	0	1
GO:0090420	BP	p	naphthalene-containing compound metabolic process	0/32	2/10157	1	4	0	1
GO:0048098	BP	p	antennal joint development	0/32	2/10157	1	3	0	1
GO:0072506	BP	p	trivalent inorganic anion homeostasis	0/32	1/10157	1	7	0	1
GO:0031365	BP	p	N-terminal protein amino acid modification	0/32	24/10157	1	7	0	1
GO:0031938	BP	p	regulation of chromatin silencing at telomere	0/32	1/10157	1	11	0	1
GO:0005513	BP	p	detection of calcium ion	0/32	1/10157	1	6	0	1
GO:0043243	BP	p	positive regulation of protein-containing complex disassembly	0/32	11/10157	1	6	0	1
GO:0035608	BP	p	protein deglutamylation	0/32	2/10157	1	9	0	1
GO:0046296	BP	p	glycolate catabolic process	0/32	5/10157	1	8	0	1
GO:2000810	BP	p	regulation of bicellular tight junction assembly	0/32	1/10157	1	6	0	1
GO:2000036	BP	p	regulation of stem cell population maintenance	0/32	8/10157	1	4	0	1
GO:0030031	BP	p	cell projection assembly	0/32	134/10157	1	5	0	1
GO:0008594	BP	p	photoreceptor cell morphogenesis	0/32	5/10157	1	6	0	1
GO:0030317	BP	p	flagellated sperm motility	0/32	20/10157	1	6	0	1
GO:0006851	BP	p	mitochondrial calcium ion transmembrane transport	0/32	10/10157	1	10	0	1
GO:1903724	BP	p	positive regulation of centriole elongation	0/32	4/10157	1	12	0	1
GO:0007476	BP	p	imaginal disc-derived wing morphogenesis	0/32	51/10157	1	5	0	1
GO:0090043	BP	p	regulation of tubulin deacetylation	0/32	3/10157	1	9	0	1
GO:1900098	BP	p	regulation of plasma cell differentiation	0/32	1/10157	1	9	0	1
GO:0071110	BP	p	histone biotinylation	0/32	1/10157	1	8	0	1
GO:0051126	BP	p	negative regulation of actin nucleation	0/32	3/10157	1	12	0	1
GO:0007429	BP	p	secondary branching, open tracheal system	0/32	1/10157	1	8	0	1
GO:0042758	BP	p	long-chain fatty acid catabolic process	0/32	2/10157	1	9	0	1
GO:0003084	BP	p	positive regulation of systemic arterial blood pressure	0/32	2/10157	1	5	0	1
GO:2000303	BP	p	regulation of ceramide biosynthetic process	0/32	6/10157	1	8	0	1
GO:0001923	BP	p	B-1 B cell differentiation	0/32	1/10157	1	8	0	1
GO:0015771	BP	p	trehalose transport	0/32	28/10157	1	8	0	1
GO:0035065	BP	p	regulation of histone acetylation	0/32	25/10157	1	10	0	1
GO:0006349	BP	p	regulation of gene expression by genetic imprinting	0/32	4/10157	1	7	0	1
GO:0007064	BP	p	mitotic sister chromatid cohesion	0/32	8/10157	1	7	0	1
GO:0061343	BP	p	cell adhesion involved in heart morphogenesis	0/32	13/10157	1	3	0	1
GO:1901580	BP	p	regulation of telomeric RNA transcription from RNA pol II promoter	0/32	1/10157	1	11	0	1
GO:2000779	BP	p	regulation of double-strand break repair	0/32	26/10157	1	8	0	1
GO:0051493	BP	p	regulation of cytoskeleton organization	0/32	205/10157	1	6	0	1
GO:0071880	BP	p	adenylate cyclase-activating adrenergic receptor signaling pathway	0/32	5/10157	1	10	0	1
GO:0006367	BP	p	transcription initiation from RNA polymerase II promoter	0/32	32/10157	1	9	0	1
GO:0010896	BP	p	regulation of triglyceride catabolic process	0/32	7/10157	1	7	0	1
GO:0097094	BP	p	craniofacial suture morphogenesis	0/32	2/10157	1	3	0	1
GO:1905471	BP	p	regulation of histone H3-K79 dimethylation	0/32	1/10157	1	11	0	1
GO:2000008	BP	p	regulation of protein localization to cell surface	0/32	4/10157	1	6	0	1
GO:0030950	BP	p	establishment or maintenance of actin cytoskeleton polarity	0/32	5/10157	1	7	0	1
GO:0007158	BP	p	neuron cell-cell adhesion	0/32	13/10157	1	4	0	1
GO:0090324	BP	p	negative regulation of oxidative phosphorylation	0/32	2/10157	1	9	0	1
GO:0019740	BP	p	nitrogen utilization	0/32	1/10157	1	1	0	1
GO:0048565	BP	p	digestive tract development	0/32	25/10157	1	4	0	1
GO:0006273	BP	p	lagging strand elongation	0/32	4/10157	1	9	0	1
GO:0110116	BP	p	regulation of compound eye photoreceptor cell differentiation	0/32	9/10157	1	9	0	1
GO:0000494	BP	p	box C/D snoRNA 3'-end processing	0/32	1/10157	1	11	0	1
GO:0055086	BP	p	nucleobase-containing small molecule metabolic process	1/32	379/10157	1	5	1	1	Ppup043010.1
GO:0050706	BP	p	regulation of interleukin-1 beta secretion	0/32	3/10157	1	10	0	1
GO:0039008	BP	p	pronephric nephron tubule morphogenesis	0/32	2/10157	1	8	0	1
GO:0042254	BP	p	ribosome biogenesis	0/32	31/10157	1	5	0	1
GO:0043090	BP	p	amino acid import	0/32	12/10157	1	9	0	1
GO:0032229	BP	p	negative regulation of synaptic transmission, GABAergic	0/32	3/10157	1	8	0	1
GO:0097756	BP	p	negative regulation of blood vessel diameter	0/32	1/10157	1	7	0	1
GO:0002374	BP	p	cytokine secretion involved in immune response	0/32	1/10157	1	10	0	1
GO:0002138	BP	p	retinoic acid biosynthetic process	0/32	1/10157	1	10	0	1
GO:0009791	BP	p	post-embryonic development	0/32	65/10157	1	2	0	1
GO:0016319	BP	p	mushroom body development	0/32	29/10157	1	3	0	1
GO:0006489	BP	p	dolichyl diphosphate biosynthetic process	0/32	2/10157	1	7	0	1
GO:0008052	BP	p	sensory organ boundary specification	0/32	3/10157	1	5	0	1
GO:0003215	BP	p	cardiac right ventricle morphogenesis	0/32	3/10157	1	5	0	1
[truncated: 9,180 more rows]
