# Supplementary material for: Comprehensive isoform-level analysis reveals the contribution of alternative isoforms to venom evolution and repertoire diversity
Source: HighWire-hosted journal article supplement (doi:10.1101/gr.277707.123), 2023-09-01
Supplement: Supplemental_Tables_S1_to_S19.zip [file Supplemental_Table_S11.xlsx]

## Sheet: Sheet1
Supplemental Table S11. Gene list of the 311 genes contained at least one venom gland-biased TSS and one carcass-biased TSS.
Number	Gene id
1	Ppup002810
2	novelGeneAS210
3	Ppup074950
4	Ppup104500
5	Ppup057710
6	Ppup003240
7	Ppup076760
8	Ppup035100
9	Ppup113130
10	Ppup011040
11	Ppup059080
12	Ppup167410_Ppup167420
13	Ppup053430
14	Ppup092220
15	novelGenePB.1810
16	Ppup028060
17	Ppup174070
18	novelGenePB.6088
19	Ppup002230
20	Ppup166070
21	Ppup034570_Ppup034580
22	Ppup144960
23	Ppup084780
24	novelGeneAS025
25	Ppup085010
26	Ppup085140
27	Ppup131470
28	novelGenePB.6033
29	Ppup113320
30	Ppup009440
31	Ppup055610
32	Ppup161780
33	Ppup144970
34	Ppup062600
35	Ppup011550
36	Ppup146620
37	Ppup039120
38	novelGenePB.203
39	Ppup052810
40	Ppup108120
41	Ppup145850
42	Ppup123160
43	Ppup142950
44	Ppup021300
45	Ppup059670
46	Ppup168550
47	Ppup038210
48	Ppup086730
49	Ppup081850
50	Ppup104760
51	Ppup119870
52	Ppup169160
53	Ppup146670
54	Ppup007280
55	Ppup074880
56	Ppup105930
57	Ppup020080
58	Ppup054430
59	Ppup021780
60	Ppup142590
61	Ppup058670
62	Ppup149790
63	Ppup131720
64	Ppup021030
65	Ppup142970
66	Ppup082270
67	Ppup093500
68	Ppup003520_Ppup003530
69	Ppup142660
70	Ppup114270
71	Ppup024570
72	novelGenePB.145
73	Ppup097470
74	Ppup136110
75	Ppup172400_Ppup172360
76	Ppup108180
77	Ppup097640
78	Ppup026000
79	novelGenePB.283
80	Ppup011100
81	Ppup082840
82	Ppup042340
83	Ppup126890
84	Ppup106650
85	Ppup012980
86	Ppup103510
87	Ppup027520
88	Ppup165030
89	Ppup001740
90	Ppup145660
91	Ppup026340
92	Ppup026790
93	Ppup004540
94	Ppup069570
95	Ppup075560
96	Ppup039020_Ppup039040_Ppup039030
97	Ppup138780
98	Ppup113550
99	Ppup023680
100	Ppup080150
101	Ppup037460
102	Ppup091240
103	Ppup093530
104	Ppup074720
105	Ppup099760
106	Ppup091760
107	Ppup052530
108	Ppup140800
109	Ppup152100
110	Ppup099460
111	Ppup114670
112	Ppup164320
113	Ppup174360
114	novelGenePB.2155
115	Ppup126200
116	Ppup014390_Ppup014400
117	Ppup130520
118	Ppup163360
119	Ppup116770
120	Ppup115310
121	Ppup145210
122	Ppup092810
123	Ppup075390
124	Ppup126340
125	Ppup122630
126	Ppup006720
127	Ppup146000
128	Ppup040030
129	Ppup119600
130	Ppup043390
131	Ppup022280
132	Ppup086000
133	Ppup054410
134	Ppup168420
135	Ppup086620
136	Ppup049150
137	Ppup160640
138	Ppup140720
139	Ppup040190
140	Ppup137390
141	Ppup105710
142	Ppup049760
143	Ppup103600
144	Ppup097780
145	Ppup092430
146	Ppup022260
147	Ppup112530
148	Ppup049390
149	Ppup138980
150	Ppup058100
151	Ppup005520
152	Ppup160350
153	Ppup161030
154	Ppup153130
155	Ppup048720
156	Ppup053090
157	Ppup050620
158	Ppup081350
159	Ppup086190
160	Ppup109060
161	Ppup011470
162	Ppup007860
163	Ppup040580
164	Ppup140060
165	Ppup125300
166	Ppup138040
167	Ppup069310
168	Ppup090540
169	Ppup075380
170	Ppup019000
171	Ppup014220
172	Ppup077110
173	Ppup007830
174	Ppup042660
175	Ppup026960
176	Ppup096620
177	Ppup109030
178	Ppup124080
179	Ppup113040
180	Ppup035050
181	Ppup054530
182	Ppup131150
183	Ppup116700
184	Ppup103150
185	novelGenePB.3525
186	Ppup010070
187	Ppup030120
188	Ppup139870
189	Ppup113360
190	Ppup018680
191	Ppup140870
192	Ppup174190
193	Ppup023010
194	Ppup086350
195	Ppup027930
196	Ppup003020
197	Ppup112390
198	Ppup063800
199	Ppup052390
200	Ppup087230
201	Ppup054330
202	Ppup040690
203	Ppup109280
204	Ppup144950
205	Ppup123000
206	Ppup135110
207	Ppup094600
208	Ppup040870
209	Ppup041140
210	Ppup158210
211	Ppup122110
212	Ppup086420
213	Ppup061590
214	Ppup012910
215	Ppup112450
216	Ppup040400
217	Ppup075590
218	Ppup019360
219	Ppup086230
220	Ppup076010
221	Ppup167830
222	Ppup043700
223	Ppup126250
224	Ppup044000
225	Ppup121600
226	Ppup025890
227	Ppup050100
228	Ppup108140
229	Ppup125740
230	Ppup059070
231	Ppup085610
232	Ppup099790
233	Ppup043560
234	Ppup028500
235	Ppup127340
236	Ppup086990
237	Ppup123220
238	Ppup010230
239	Ppup096380
240	Ppup112310
241	Ppup125610_Ppup125600
242	Ppup054080
243	Ppup080190
244	Ppup019950
245	Ppup151060
246	novelGeneAS021
247	Ppup027160
248	Ppup046890
249	Ppup021340
250	Ppup109420
251	Ppup113340
252	Ppup003930
253	Ppup005840
254	Ppup154620
255	Ppup086570
256	Ppup139000
257	Ppup167970
258	Ppup020370_Ppup020360
259	Ppup001770_Ppup001780
260	Ppup077090_Ppup077080
261	Ppup082610
262	Ppup091940
263	Ppup083870
264	Ppup092580
265	Ppup016850
266	Ppup166580
267	Ppup152700
268	Ppup095620
269	Ppup069770
270	Ppup161960
271	novelGeneAS167
272	Ppup147060
273	Ppup160910
274	Ppup039040_Ppup039030
275	Ppup093510
276	Ppup077190
277	Ppup132140
278	Ppup006820
279	Ppup041170
280	Ppup004470
281	Ppup115110
282	Ppup002870
283	Ppup107820
284	Ppup111560
285	Ppup016830
286	Ppup065970
287	Ppup104560
288	Ppup144180
289	Ppup164070
290	Ppup142960
291	Ppup112420
292	Ppup163860
293	Ppup139640
294	Ppup008010
295	Ppup057320
296	Ppup009320
297	Ppup046280
298	Ppup073400
299	Ppup167150
300	Ppup027770
301	Ppup173120
302	Ppup023200
303	novelGeneAS109
304	Ppup127660
305	Ppup069070
306	novelGeneMSTRG.6573
307	Ppup156280
308	novelGenePB.5712
309	Ppup107330
310	novelGenePB.685
311	Ppup092900
