# Supplementary material for: Comprehensive isoform-level analysis reveals the contribution of alternative isoforms to venom evolution and repertoire diversity
Source: HighWire-hosted journal article supplement (doi:10.1101/gr.277707.123), 2023-09-01
Supplement: Supplemental_Tables_S1_to_S19.zip [file Supplemental_Table_S12.xlsx]

## Sheet: Sheet1
Supplemental Table S12. Gene list of the 89 genes that had at least one venom gland-biased TES and one carcass-biased TES.
Number	Gene id
1	novelGeneAS014
2	novelGeneAS150
3	Ppup029850
4	Ppup077530
5	Ppup002810
6	novelGeneAS216
7	novelGenePB.2155
8	Ppup018680
9	Ppup025540
10	Ppup027150
11	Ppup028590
12	Ppup031660
13	Ppup033110
14	Ppup039560
15	Ppup050410
16	Ppup058460
17	Ppup059180
18	Ppup064880
19	Ppup069530
20	Ppup070750
21	Ppup073400
22	Ppup074980
23	Ppup075460
24	Ppup084270
25	Ppup086350
26	Ppup090940
27	Ppup092970
28	Ppup093120
29	Ppup093610
30	Ppup094770
31	Ppup110180
32	Ppup115290
33	Ppup117270
34	Ppup117300
35	Ppup119950
36	Ppup121660_Ppup121670
37	Ppup124800
38	Ppup125340
39	Ppup131720
40	Ppup133210
41	Ppup139640
42	Ppup139870
43	Ppup141800
44	Ppup144610
45	Ppup145500
46	Ppup153070
47	Ppup165300
48	Ppup166500
49	Ppup167530
50	Ppup171700
51	Ppup173740
52	Ppup057710
53	Ppup028060
54	Ppup095480
55	Ppup146980
56	Ppup019680
57	novelGenePB.7086
58	Ppup075610
59	Ppup040410
60	Ppup175500
61	Ppup106190
62	Ppup147090
63	Ppup006000_Ppup006010
64	Ppup018630
65	Ppup125280
66	Ppup142970
67	Ppup103710
68	Ppup127580
69	Ppup095490
70	Ppup023680
71	Ppup104050
72	Ppup176390
73	Ppup044300
74	Ppup096790
75	Ppup145660
76	Ppup162070
77	Ppup162780
78	novelGeneAS227
79	Ppup127980
80	Ppup124810
81	Ppup033340
82	Ppup076380
83	Ppup021030
84	Ppup039010
85	Ppup028360
86	novelGeneAS145
87	Ppup114820
88	Ppup052630
89	Ppup097110
