# Supplementary material for: Comprehensive isoform-level analysis reveals the contribution of alternative isoforms to venom evolution and repertoire diversity
Source: HighWire-hosted journal article supplement (doi:10.1101/gr.277707.123), 2023-09-01
Supplement: Supplemental_Tables_S1_to_S19.zip [file Supplemental_Table_S13.xlsx]

## Sheet: Sheet1
Supplemental Table S13. Summary of the 179 venom genes.
gene	log2FoldChange	padj	Annotation	Venom.rep1	Venom.rep2	Venom.rep3	Carcass.rep1	Carcass.rep2	Carcass.rep3	multi_Proteins	Signal peptide
novelGeneAS014	8.4282	7.21686e-255		715.539	752.556	694.718	15.5849	9.52742	9.59909	0	yes
novelGeneAS030	4.13432	4.09296e-157		552.137	432.354	546.234	151.95	156.204	180.685	0	no
novelGeneAS034	0.965741	9.39589e-77		196.196	208.798	191.053	518.759	584.778	600.03	0	no
novelGeneAS127	-0.28521	3.11618e-05		97.47	103.386	105.757	624.54	722.431	740.842	0	no
novelGeneAS150	7.765	1.65724e-88		3747.12	4005.63	3766.88	155.072	77.9056	56.3547	0	yes
novelGeneAS210.PB.2452	9.73165	4.14588e-123		3569.95	3622.72	3887.69	36.4271	15.3658	19.6848	1	yes
novelGenePB.1444	2.97424	8.1827e-61		1900.12	2081.69	1777.33	1606.89	1303.66	1141.08	0	no
novelGenePB.2583	5.21067	1.46681e-252		647.992	709.043	703.594	120.389	90.9538	96.6665	0	no
novelGenePB.3969	11.0936	4.46239e-49		190.187	205.73	218.755	0.805247	0.076504	0.660413	1	yes
novelGenePB.4119	13.1124	1.6289e-134		23848.9	19850.4	18498.8	15.1834	3.05012	20.9936	0	yes
novelGenePB.5711	2.76998	1.70176e-240		126.49	133.985	113.915	97.8362	102.332	105.755	1	no
novelGenePB.5980	10.8033	2.31449e-11		7416.75	6694.98	7066.28	43.9771	0	20.1702	1	yes
novelGenePB.7276	11.0024	4.75766e-25		2037.55	1730.77	2021.62	9.37711	0.274429	5.76131	0	yes
Ppup001840	12.0704	5.15918e-84	Putative uncharacterized protein	1935.87	2188.92	2878.39	5.87353	0.867958	1.90323	1	yes
Ppup002680	11.6414	1.28454e-28	Lipase member K	3302.97	2765.98	4466.5	13.8525	0.227471	3.6239	1	yes
Ppup002810	8.99251	0	Alpha-amylase 2	8439.24	9338.29	9396.67	106.849	89.7866	99.6102	1	yes
Ppup003240	4.57869	1.22167e-88	Natterin-3	801.683	746.063	1025.72	245.619	184.761	166.214	1	no
Ppup006060	2.20604	4.11276e-213	Tumor protein D54	105.834	114.986	98.5618	117.978	130.715	137.492	1	no
Ppup006300	-0.0845959	0.130279	ATP synthase subunit b, mitochondrial	118.924	126.246	124.835	690.657	759.506	737.759	0	no
Ppup006390	3.35666	2.72307e-89	Protein ERGIC-53	181.394	159.823	228.514	101.707	103.078	106.154	1	yes
Ppup006550	3.55808	2.30628e-118	Multiple coagulation factor deficiency protein 2 homolog	118.276	116.053	154.913	62.9065	62.0349	59.3063	0	yes
Ppup006730	0.711829	1.17996e-51	Nascent polypeptide-associated complex subunit alpha	295.584	316.66	289.481	959.02	1044.04	1067.18	1	no
Ppup010390	4.33572	1.79744e-189	Leukocyte elastase inhibitor	179.866	246.314	168.35	52.1414	57.155	54.0478	1	yes
Ppup011040	3.74009	0	Serine protease inhibitor 27A	341.177	422.311	389.91	141.74	166.646	173.017	1	yes
Ppup011140	3.86953	9.35585e-49	GILT-like protein 1	223.155	217.549	400.05	114.178	101.382	105.057	0	yes
Ppup014060	0.162792	0.466042	Cathepsin L	103.578	179.076	136.131	704.471	698.762	662.649	0	yes
Ppup014140	1.88601	8.3417e-112	Eukaryotic translation initiation factor 3 subunit C	96.3785	121.214	113.811	158.845	167.549	172.469	0	no
Ppup015760	10.7731	9.5766e-115	Probable uridine nucleosidase 2	1977.03	1959.7	2363.82	11.1801	3.15595	5.34961	1	yes
Ppup018070	-0.851866	3.18259e-05	Heat shock protein 83	147.426	125.826	189.632	1464.21	1614.31	1601.13	0	no
Ppup018640	11.5649	2.73242e-45	Putative uncharacterized protein	1996.55	1998.15	2395.45	8.02826	0.407311	2.94734	0	yes
Ppup018650	11.2096	5.47408e-48	Putative uncharacterized protein	2875.04	2860.62	3340.12	14.8187	1.20565	4.61728	1	yes
Ppup019220	10.9497	1.49279e-31	Beta-1,3-glucan-binding protein	157.997	216.843	151.257	1.05373	0.044129	0.318902	1	yes
Ppup019470	12.6435	9.50036e-142	Putative uncharacterized protein	131.703	104.009	182.3	0.177969	0.02232	0.166276	0	no
Ppup019930	-0.0736934	0.640995	Bone morphogenetic protein receptor type-1B	167.167	201.036	164.463	871.1	1099.87	1160.14	1	yes
Ppup021070	2.75342	1.64159e-06	Heat shock 70 kDa protein cognate 3	319.693	221.572	1045.64	394.284	484.228	446.426	1	yes
Ppup021370	4.99823	1.25237e-195	Ester hydrolase C11orf54 homolog	257.768	253.289	277.465	51.4849	47.677	37.8626	1	no
Ppup024540	1.93622	5.46139e-168	Eukaryotic translation initiation factor 3 subunit B	100.188	119.189	115.177	154.231	168.565	163.997	1	no
Ppup024890	11.6771	1.82047e-37	Putative uncharacterized protein	27022.5	22274.6	21812.6	77.5177	2.1156	38.1066	0	yes
Ppup025090	9.60232	0	Putative uncharacterized protein	313.653	332.644	363.519	2.96332	2.07742	2.14848	1	yes
Ppup025640	0.261443	0.0893665	ADP,ATP carrier protein 2	278.695	392.584	361.582	1540.15	1632.24	1611.71	1	no
Ppup025730	12.0019	1.15767e-50	Myeloblastin	12448.7	12814.2	14807.4	33.4393	2.7246	16.8455	1	yes
Ppup026150	10.5403	1.82323e-16	Putative uncharacterized protein	2811.12	2208.01	3274.71	24.3949	0.434205	5.00055	0	yes
Ppup028750	2.09689	5.66169e-149	Eukaryotic translation initiation factor 3 subunit M	114.27	137.26	124.167	162.507	168.326	157.208	1	no
Ppup030520	-0.0333737	0.830018	Cytochrome c oxidase subunit 7A-related protein, mitochondrial	296.618	253.849	288.213	1526.93	1603.96	1669.71	0	no
Ppup030930	11.3866	1.05161e-22	Putative uncharacterized protein	11520.5	8597.76	10563.7	41.7406	1.03988	19.3528	0	yes
Ppup031010	1.88218	7.9697e-61	Eukaryotic translation initiation factor 3 subunit I	175.924	206.334	191.964	311.001	284.217	268.595	0	no
Ppup031550	0.732769	3.49754e-24	Eukaryotic translation initiation factor eIF1	199.071	222.575	199.202	640.281	680.662	763.03	0	no
Ppup033820	2.82988	8.20296e-82	Transmembrane emp24 domain-containing protein 7	123.634	116.51	146.517	109.001	96.1958	97.5867	0	yes
Ppup034570_Ppup034580	1.54529	3.37715e-74		115.869	129.603	128.829	237.439	228.513	247.871	1	no
Ppup035100	6.01966	0	2-oxoglutarate and iron-dependent oxygenase domain-containing protein 3	613.232	598.433	649.846	51.7964	53.7818	54.525	1	no
Ppup037540	0.812941	4.52252e-10	14-3-3 protein epsilon	132.534	176.984	133.603	411.407	477.079	515.874	1	no
Ppup040060	1.80162	7.17071e-42	Polyadenylate-binding protein 1	2383.58	2915.48	2457.69	3757.11	3946.18	4696.67	1	no
Ppup040410	3.28068	1.58893e-15	Protein disulfide-isomerase A6 homolog	143.335	120.637	358.027	115.284	126.757	116.694	1	yes
Ppup042120	11.792	7.12113e-46	Venom allergen 3	9481.64	8468.59	10614.6	27.4119	1.62306	14.8138	1	yes
Ppup042420	2.90576	1.26266e-15	Ejaculatory bulb-specific protein 3	768.308	2516.6	1626.94	1114.33	1289.93	1196.19	0	yes
Ppup043000	11.531	5.21915e-27	Adenosine deaminase 2	607.79	620.302	780.797	2.52863	0.09258	1.0516	0	yes
Ppup043010	11.2578	4.76171e-30	Adenosine deaminase 2	239.795	244.264	562.45	1.64624	0.10478	0.552613	1	yes
Ppup043730	11.1773	1.0921e-175	Putative uncharacterized protein	2294.78	1981.88	3330.07	8.5048	3.46932	6.24346	1	yes
Ppup044200	1.85677	1.19878e-83	Methionine aminopeptidase 2	155.737	195.828	160.507	262.245	256.29	266.454	0	no
Ppup044750	11.7217	5.22881e-26	Putative uncharacterized protein	15459.8	13046.3	19735.7	54.299	1.59878	21.3714	1	yes
Ppup047900	3.42059	1.72199e-147	N-acetylneuraminate lyase	149.728	182.174	159.654	94.9728	79.4161	79.6687	0	no
Ppup048440	-0.0681743	0.739758	Y-box factor homolog	341.633	429.616	323.835	1875.93	2025.9	2497.65	1	no
Ppup053430	1.8334	8.04239e-68	Reticulon-3-A	207.193	245.863	246.876	318.619	367.002	411.254	1	no
Ppup054570	2.83838	1.28157e-98	Translationally-controlled tumor protein homolog	1128.94	1304.41	1079.06	971.817	899.797	851.739	0	no
Ppup057560	1.9097	2.62072e-66	Myophilin	115.002	150.669	123.386	190.599	203.139	180.73	0	no
Ppup057710	7.54327	1.65744e-163	Putative uncharacterized protein	920.778	731.117	1151.95	34.1576	26.2578	23.0766	1	yes
Ppup058210	1.34933	2.42429e-06	Peptidyl-prolyl cis-trans isomerase B	242.405	234.566	412.13	783.984	570.114	581.483	0	yes
Ppup059490	11.8795	8.01997e-36	Major royal jelly protein 2	2763.3	2480.05	2804.46	8.55071	0.18942	2.74862	0	yes
Ppup059510	11.364	7.54512e-136	Major royal jelly protein 1	4339.7	4284.87	4575.31	13.7343	4.60291	9.19274	1	yes
Ppup059810	0.790165	1.07311e-10	Cytochrome c oxidase subunit 5B, mitochondrial	154.915	179.473	162.272	560.436	564.856	468.471	0	no
Ppup060190	10.9307	7.18172e-29	Modular serine protease	379.769	414.712	383.237	2.49568	0.147455	0.605076	1	yes
Ppup061580	2.93948	4.2239e-10	Endoplasmin	280.679	199.667	697.234	262.384	298.947	302.146	1	yes
Ppup063140	2.37376	5.41187e-119	Serine proteinase stubble	170.139	196.309	171.082	192.024	207.582	176.769	0	yes
Ppup063330	11.2839	1.37735e-31	Putative uncharacterized protein	1961.06	1936.19	2321.7	8.52059	0.480866	4.52809	0	yes
Ppup063660	0.750704	1.01665e-10	Superoxide dismutase [Cu-Zn]	148.115	180.757	151.212	560.642	529.576	491.189	0	no
Ppup064550	10.7008	2.59428e-48	Putative uncharacterized protein	2312.12	2238.4	2308.83	14.5577	1.32594	6.25048	1	yes
Ppup069220	1.91917	5.51635e-107	Transcription factor BTF3 homolog 4	509.624	558.942	465.521	717.264	744.228	798.647	1	no
Ppup069240	1.88966	4.17637e-80	CCHC-type zinc finger protein CG3800	571.772	639.346	523.869	802.377	882.348	925.821	1	no
Ppup069400	0.58724	4.43181e-08	Peptidyl-prolyl cis-trans isomerase	409.292	534.537	426.763	1613.86	1785.19	1669.12	0	no
Ppup069460	1.47822	6.9937e-139	Eukaryotic translation initiation factor 3 subunit G	104.82	111.581	109.33	211.511	225.026	214.911	0	no
Ppup069750	3.31128	6.39312e-21	Protein disulfide-isomerase	478.719	475.182	1018.91	383.457	386.893	338.284	0	yes
Ppup070950	11.6516	1.19013e-34	Putative uncharacterized protein	6845.74	6639.77	6032.51	23.2929	0.524382	8.84563	1	yes
Ppup071400	12.083	6.86017e-30	Venom acid phosphatase Acph-1	1457.96	1370.47	1636.33	3.83478	0.143213	1.5908	1	yes
Ppup075910	1.91817	3.95298e-219	Putative acyl-CoA-binding protein	206.276	224.013	217.337	316.248	316.317	321.528	0	no
Ppup077490	8.44622	6.03398e-248	Orcokinin peptides type B	148.423	170.563	257.964	3.37935	3.24272	2.57747	0	yes
Ppup081600	11.9115	2.54185e-34	Serine protease 55	31092.9	29527.3	35022.8	91.4578	5.15817	37.6724	1	yes
Ppup082330	0.696902	2.16652e-15	Lysosomal aspartic protease	130.854	156.658	135.428	479.231	509.01	461.805	0	yes
Ppup083210	10.98	1.55213e-13	Kynurenine--oxoglutarate transaminase 3	2385.76	2688.88	3399.09	18.7637	0.122496	3.42535	1	yes
Ppup083750	11.8131	4.61105e-39	Putative uncharacterized protein	547.562	569.618	594.239	1.9409	0.069741	0.53812	1	no
Ppup084180	10.9519	1.57679e-49	Putative uncharacterized protein	3939.38	3235.77	4438.63	19.3477	1.17818	11.5624	0	yes
Ppup084780	0.547694	5.19386e-07	Transitional endoplasmic reticulum ATPase TER94	107.025	117.815	132.954	427.159	462.167	476.465	1	no
Ppup085010	1.24456	1.91011e-44	Eukaryotic translation initiation factor 3 subunit A	90.9501	117.121	100.928	221.352	249.722	254.902	1	no
Ppup092220	3.86882	2.35519e-57	Putative uncharacterized protein	221.69	228.297	194.481	108.835	64.8946	69.3274	1	no
Ppup093230	0.753124	3.45395e-09	Plasminogen activator inhibitor 1 RNA-binding protein	297.868	364.973	279.033	922.696	1055.01	1136.73	1	no
Ppup093570	0.393694	0.000618052	ATP synthase subunit beta, mitochondrial	222.476	292.398	257.822	971.225	1191.77	1112.57	1	no
Ppup095690	6.3855	0	Modular serine protease	316.015	332.762	370.856	22.7512	23.0906	22.0896	1	yes
Ppup096410	8.59618	4.30183e-15	Kynurenine--oxoglutarate transaminase 3	215.62	393.691	336.507	10.4573	1.09467	1.38999	1	yes
Ppup097100_PB.6855	12.7545	1.1378e-46	Putative uncharacterized protein	12228.1	10030.6	22772.5	14.158	1.75216	20.517	1	yes
Ppup097100_PB.6857	12.7824	7.36941e-43	Putative uncharacterized protein	7286.44	6267.22	15336.8	7.15367	1.20322	11.2359	0	yes
Ppup099330	0.660132	1.50387e-07	Uncharacterized protein CG16817	183.461	180.988	226.323	661.881	692.304	734.715	0	no
Ppup101360	3.73681	1.81359e-34	calreticulin	720.645	746.239	1378.73	423.341	372.113	393.456	0	yes
Ppup103170	3.30863	6.69218e-59	Protein disulfide-isomerase A3	627.524	655.461	923.916	380.807	442.71	421.555	1	yes
Ppup103870	5.48845	1.66178e-114	GILT-like protein 1	850.408	900.576	948.556	144.18	100.41	86.9681	0	yes
Ppup104440	10.8566	5.60419e-15	Trypsin-3 (Fragment)	158.812	220.822	177.384	1.41143	0	0.202144	0	no
Ppup104500	2.46931	1.44458e-66	Elongation factor 2	1233.42	1636.94	1388.3	1414.99	1442.67	1409.67	0	no
Ppup105760	3.44265	3.65828e-134	Protein FAM151A	403.377	546.732	407.379	205.829	234.318	254.631	1	yes
Ppup105800	0.807308	0.000370152	Putative uncharacterized protein	135.643	184.91	139.677	357.073	472.856	641.921	1	no
Ppup108160	3.16149	1.05057e-57	Staphylococcal nuclease domain-containing protein 1	173.533	170.035	253.614	115.532	128.277	129.532	1	no
Ppup113130	2.31962	6.53105e-80	Eukaryotic initiation factor 4A-II	597.883	734.127	598.691	735.717	706.759	703.479	1	no
Ppup114520	1.28408	1.05998e-22	Heat shock 70 kDa protein cognate 4	1250.1	1646.93	1391.49	3033.98	3428.31	3330.73	1	no
Ppup117110	11.8283	2.32112e-36	Lipase 1	3142.39	3060.88	3552.95	9.66176	0.262161	4.61575	1	yes
Ppup117160	-0.339774	0.00886208	Glyceraldehyde-3-phosphate dehydrogenase 2	235.895	300.045	221.231	1666.88	1858.04	1802.09	1	no
Ppup119400	6.73227	2.15657e-246	Putative uncharacterized protein	5966.63	7266.71	5630.11	282.275	351.579	355.968	1	no
Ppup119950	0.968641	4.05847e-28	Pyruvate kinase	85.8033	103.797	98.6721	258.781	297.531	263.747	1	no
Ppup120430	2.33712	2.47934e-55	Serine protease easter	93.2564	126.993	100.875	129.387	115.817	106.008	0	yes
Ppup120440	7.14341	1.62481e-257	Melanization protease 1	986.469	989.931	1287.4	48.3788	38.7278	41.1348	0	yes
Ppup121980	-0.390228	0.00696767	ATP synthase-coupling factor 6, mitochondrial	279.835	231.664	247.487	1858.82	1994.33	1698.88	0	no
Ppup122280	0.783299	1.73148e-14	ATP synthase subunit gamma, mitochondrial	101.352	117.551	106.395	351.521	379.736	319.103	0	no
Ppup122720	1.88847	6.06386e-43	Catalase	101.851	138.111	102.375	178.304	172.956	160.547	1	no
Ppup123250	0.707023	6.93807e-08	Nucleolar protein 56	152.212	141.015	128.479	508.037	459.728	470.226	1	no
Ppup124130	1.52382	1.36978e-52	Eukaryotic translation initiation factor 3 subunit F	126.285	133.33	122.502	261.024	241.411	235.808	0	no
Ppup124290	0.1277	0.036607	Nucleoplasmin-like protein	151.952	159.133	161.217	758.627	841.322	811.928	1	no
Ppup124480	2.34918	3.79926e-135	Eukaryotic translation initiation factor 3 subunit E	138.577	160.411	155.197	172.32	162.633	160.133	0	no
Ppup130100	12.3416	9.83227e-77	Endothelial lipase	2514.98	2126.15	3182.56	4.84748	0.459453	2.89435	1	yes
Ppup130110	11.1349	4.97088e-12	Pancreatic lipase-related protein 2	155.059	183.496	257.342	1.3265	0.067111	0	0	yes
Ppup131580	11.9056	3.56025e-33	Putative uncharacterized protein	196.796	184.869	212.853	0.500598	0.023202	0.32224	0	no
Ppup131990	-2.34363	3.14608e-32	Putative uncharacterized protein	104.507	182.046	108.286	3358.32	3842.23	3895.61	0	yes
Ppup132210	12.2025	7.98614e-41	Putative uncharacterized protein	4079.74	3555.61	4242.42	6.34717	0.349287	7.25965	0	yes
Ppup132950	13.1276	8.59159e-286	Putative uncharacterized protein	218.685	179.785	216.281	0.14151	0.032405	0.211365	0	no
Ppup133440	-2.38979	2.97032e-10	Vitellogenin	104.215	288.009	184.048	5096.42	5974.59	5550.28	1	yes
Ppup133780	2.07925	1.5038e-158	Very long-chain-fatty-acid--CoA ligase bubblegum	132.763	149.417	130.311	179.121	185.524	178.347	1	no
Ppup133960	2.17632	1.55508e-75	Ankyrin-3	220.166	243.291	207.419	242.702	270.405	316.059	1	no
Ppup134390	11.9176	1.60709e-28	Venom acid phosphatase Acph-1	16843.4	15493.3	19002.2	47.6431	1.19822	23.1011	1	yes
Ppup136900	11.1676	5.66627e-120	Venom acid phosphatase Acph-1	1446.26	1308.55	1655.08	5.68459	1.43486	3.39694	1	yes
Ppup137170	2.00229	2.2219e-55	Elongation factor 1-beta	174.246	169.33	178.917	266.446	226.657	231.7	0	no
Ppup139200	2.98011	9.10042e-78	Thioredoxin domain-containing protein	99.5138	90.583	127.934	73.9877	74.5928	76.6436	0	yes
Ppup140770	2.26518	8.12472e-56	Serpin B8	319.983	439.478	307.526	393.064	431.682	406.689	1	yes
Ppup140900	0.593501	0.00385946	Calmodulin	271.664	370.765	249.96	843.666	1214.18	1243.91	0	no
Ppup141160	1.8453	9.48767e-106	GTP-binding protein SAR1b	220.241	230.263	234.078	359.925	353.954	346.654	1	no
Ppup141800	-0.50803	0.090535	Calcium-transporting ATPase sarcoplasmic/endoplasmic reticulum type	91.1122	101.981	115.552	507.147	858.677	1109.78	1	no
Ppup143080	3.05614	5.55577e-117	tRNA modification GTPase GTPBP3, mitochondrial	4145.67	4126.06	4187.9	3028.52	2677.15	2619.39	0	no
Ppup143270	3.24864	8.77287e-19	Peptidyl-prolyl cis-trans isomerase FKBP14	108.127	90.3378	234.607	97.932	80.525	75.3813	0	yes
Ppup145020	3.40082	2.73744e-84	Guanine nucleotide-binding protein subunit beta-like protein	1887.09	2164.09	1918.19	1176.17	1047.16	905.647	1	no
Ppup146290	1.22481	2.58978e-24	Cytochrome c1, heme protein, mitochondrial	116.019	141.857	115.426	310.648	305.143	269.666	0	no
Ppup146380	-0.0334354	0.885376	Ferritin heavy polypeptide-like 17	174.532	253.35	219.088	1297.06	1220.52	1145.05	0	yes
Ppup147120	11.5013	1.49487e-47	Pancreatic lipase-related protein 2	419.424	432.794	454.877	1.66087	0.174794	0.625453	1	yes
Ppup149470	1.08286	4.07395e-25	Peptidyl-prolyl cis-trans isomerase FKBP1B	221.31	243.723	229.445	636.525	627.399	557.231	0	no
Ppup153050	11.0796	1.43254e-288	Putative uncharacterized protein	1030.2	942.861	700.031	2.30054	2.05533	2.54226	0	yes
Ppup157440	0.987393	1.87345e-29	Putative uncharacterized protein	102.486	109.896	112.551	308.199	285.747	318.57	0	no
Ppup161360	11.2758	1.39285e-26	Putative uncharacterized protein; small pacifastin protease inhibitor precursor [Nasonia vitripennis]	86110.2	70985	75909.7	367.872	6.90199	131.988	0	no
Ppup162510	1.18144	4.7025e-45	14-3-3 protein zeta	167.529	209.32	170.098	408.925	465.647	468.114	0	no
Ppup162910	-0.234469	0.00148715	Peroxiredoxin 1	183.533	206.596	201.321	1264.77	1350.3	1258.73	0	no
Ppup163540	11.2198	7.93673e-23	Putative uncharacterized protein	7834.67	8482.06	8141.85	42.7464	0.735493	11.3357	1	yes
Ppup164310	3.33725	6.07453e-81	Dolichyl-diphosphooligosaccharide--protein glycosyltransferase subunit 2	173.333	177.087	234.939	113.985	106.507	101.832	0	yes
Ppup164480_Ppup164470	1.16119	7.78684e-36		94.6253	103.916	98.454	254.804	252.916	230.3	0	no
Ppup166070	1.60673	8.86758e-233	Ras-related protein Rab-1A	124.22	133.437	130.011	222.838	236.563	250.656	1	no
Ppup166710	11.2702	1.92079e-36	Venom metalloproteinase 3	717.271	759.227	753.101	3.46619	0.191105	1.19256	1	yes
Ppup167500	4.262	0	Transcription initiation factor IIB	354.993	334.657	381.751	103.011	106.971	101.597	1	no
Ppup167750	11.4564	2.07784e-45	Neprilysin-2	1284.98	1223.72	1430.22	5.09016	0.264505	2.22152	1	yes
Ppup168100	11.6709	8.09723e-22	Glutathione hydrolase 1 proenzyme	683.691	714.931	887.3	2.76622	0.059405	0.952735	1	yes
Ppup168280	-0.574184	3.31193e-09	RNA-binding protein squid	124.223	145.425	126.972	937.912	1179.09	1180.81	1	no
Ppup168800	1.0654	1.56846e-37	ATPase inhibitor mai-2, mitochondrial	233.294	225.078	236.091	615.291	609.729	625.552	1	no
Ppup169270	1.66466	1.46461e-137	Elongation factor 1-gamma	403.584	451.636	411.212	731.122	746.494	745.556	1	no
Ppup169650	11.0289	9.85922e-28	Putative uncharacterized protein	25322	23710.8	24698.6	135.051	3.28964	51.9317	1	yes
Ppup170480	1.8907	3.03945e-48	ADP-ribosylation factor 1	168.57	165.836	187.479	282.663	241.609	258.576	0	no
Ppup170900	11.0855	2.49234e-38	Putative uncharacterized protein	1684.58	1834.24	1485.85	8.78238	0.668933	2.95312	0	yes
Ppup172530	3.43567	1.96734e-198	Alpha-tocopherol transfer protein-like	104.323	106.4	124.314	58.7421	55.9972	57.7664	0	no
Ppup173360	11.0879	1.0582e-18	Putative uncharacterized protein; GOBP	5527.64	5280.11	5383.11	30.7983	0.572678	8.40663	0	yes
Ppup174560	0.864373	2.28835e-37	Glutathione S-transferase	99.4955	108.326	113.169	305.515	344.211	334.407	0	no
Ppup174940	1.28829	3.67707e-09	Glycine N-methyltransferase	117.628	120.695	150.926	365.613	261.266	254.767	0	no
Ppup175010	0.979986	1.67326e-25	ATP synthase subunit alpha, mitochondrial	181.435	231.313	212.549	542.196	623.059	599.577	0	no
Ppup175270	11.6704	1.17023e-37	Putative uncharacterized protein	53074.9	42017.1	45564.4	142.506	5.97436	87.4119	1	yes
Ppup175350	11.8654	2.98916e-62	Neprilysin-2	637.536	594.36	696.837	1.7907	0.10148	0.907444	1	yes
Ppup175370	11.978	5.19406e-106	Putative uncharacterized protein	3870.56	3691.94	4659.79	8.07267	1.18886	7.49112	0	yes
Ppup175750	11.2424	8.11855e-47	Lipase member I	1128.06	1328.93	1304.06	5.9741	0.303674	2.05389	1	yes
Ppup176160	12.1167	2.80302e-33	Trypsin-1	11998.7	12066.8	14737.1	32.7644	0.929574	13.5178	1	yes
Ppup176170	10.7857	1.09381e-33	Trypsin-4	8891.29	9056.67	7918.96	59.0928	3.43778	15.9948	1	yes
Ppup176270	2.23111	2.77329e-56	UDP-N-acetylglucosamine--peptide N-acetylglucosaminyltransferase 110 kDa subunit	127.458	135.849	101.172	125.235	154.116	154.391	1	no
Ppup176290	0.992382	4.55125e-30	Nucleoside diphosphate kinase	451.184	495.66	458.857	1309.98	1389.38	1231.58	0	no
