# Supplementary material for: Comprehensive isoform-level analysis reveals the contribution of alternative isoforms to venom evolution and repertoire diversity
Source: HighWire-hosted journal article supplement (doi:10.1101/gr.277707.123), 2023-09-01
Supplement: Supplemental_Tables_S1_to_S19.zip [file Supplemental_Table_S14.xlsx]

## Sheet: Sheet1
Supplemental Table S14. Summary of the 179 venom genes and their isoform
gene	isoform number	isoforms
Ppup139200	2	PB.41.1,PB.41.2
Ppup140770	23	PB.148.29,PB.148.9,PB.148.3,PB.148.11,PB.148.19,PB.148.25,PB.148.6,PB.148.32,PB.148.13,PB.148.26,PB.148.17,PB.148.20,PB.148.1,PB.148.28,PB.148.27,PB.148.23,PB.148.22,PB.148.30,PB.148.16,PB.148.18,PB.148.31,PB.148.21,PB.148.34
Ppup140900	6	PB.161.9,PB.161.8,PB.161.7,PB.161.6,PB.161.4,PB.161.1
Ppup141160	8	PB.181.7,PB.181.4,PB.181.6,PB.181.1,PB.181.9,PB.181.10,PB.181.12,PB.181.13
Ppup141800	12	PB.225.4,PB.225.22,PB.225.38,PB.225.41,PB.225.49,PB.225.42,PB.225.55,PB.225.61,PB.225.72,PB.225.79,PB.225.81,PB.225.94
Ppup143080	3	PB.331.2,PB.331.1,PB.333.1
Ppup143270	1	PB.347.1
novelGeneAS014	4	PB.377.1,PB.378.1,PB.378.2,PB.378.3
Ppup145020	4	PB.466.1,PB.466.2,PB.466.3,PB.466.4
Ppup146290	2	PB.563.4,PB.563.1
Ppup146380	2	PB.573.1,PB.573.2
Ppup147120	12	PB.628.1,PB.628.11,PB.628.12,PB.628.16,PB.628.2,PB.628.3,PB.628.5,PB.628.7,PB.628.8,PB.628.9,PB.628.22,PB.628.24
Ppup043000	1	PB.636.2
Ppup043010	2	PB.637.1,PB.637.2
Ppup043730	3	PB.692.6,PB.692.1,PB.692.5
Ppup044200	2	PB.717.1,PB.717.2
Ppup044750	18	PB.742.1,PB.742.3,PB.742.8,PB.742.13,PB.742.20,PB.742.38,PB.742.40,PB.742.44,PB.742.45,PB.742.46,PB.742.47,PB.742.48,PB.742.50,PB.742.51,PB.742.67,PB.742.68,PB.742.7,PB.742.73
novelGeneAS030	1	PB.838.1
Ppup103870	1	PB.3489.1
Ppup104440	1	PB.3523.1
novelGeneAS034	4	PB.3527.1,PB.3528.1,PB.3529.1,PB.3529.2
Ppup104500	4	PB.3533.3,PB.3533.11,PB.3533.19,PB.3533.34
Ppup105760	5	PB.3627.8,PB.3627.6,PB.3627.3,PB.3627.2,PB.3627.9
Ppup105800	12	PB.3630.2,PB.3630.3,PB.3630.4,PB.3630.6,PB.3630.23,PB.3630.16,PB.3630.20,PB.3630.18,PB.3630.31,PB.3630.36,PB.3630.38,PB.3630.42
Ppup075910	1	MSTRGVenom.1160.1
Ppup096410	5	PB.6803.3,PB.6803.4,PB.6803.7,PB.6803.9,PB.6803.8
Ppup069220	4	PB.7016.4,PB.7016.3,PB.7016.5,PB.7016.1
Ppup069240	10	PB.7018.1,PB.7018.3,PB.7018.8,PB.7018.9,PB.7018.6,PB.7018.7,PB.7018.15,PB.7018.16,PB.7018.23,PB.7018.18
Ppup069400	2	PB.7030.1,PB.7030.2
Ppup069460	2	PB.7035.1,PB.7035.2
Ppup069750	4	PB.7056.3,PB.7056.4,PB.7056.6,PB.7056.10
Ppup077490	1	PB.7110.3
Ppup030520	1	PB.7121.1
Ppup061580	6	PB.7123.1,PB.7123.2,PB.7123.5,PB.7123.6,PB.7123.8,PB.7123.9
Ppup063140	2	PB.3744.2,PB.3744.5
Ppup063330	3	PB.3760.1,PB.3760.3,PB.3760.4
Ppup063660	1	PB.3783.1
Ppup064550	6	PB.3830.17,PB.3830.1,PB.3830.3,PB.3830.4,PB.3830.5,PB.3830.6
Ppup015760	5	PB.7163.1,PB.7163.2,PB.7163.3,PB.7163.4,PB.7163.6
Ppup130100	4	PB.7186.1,PB.7186.2,PB.7186.4,PB.7186.5
Ppup130110	2	PB.7187.1,PB.7187.2
Ppup030930	3	PB.7226.1,PB.7226.2,PB.7226.3
Ppup031010	1	PB.7234.1
Ppup031550	1	PB.7256.1
novelGenePB.7276	1	PB.7276.1
Ppup108160	6	PB.7325.4,PB.7325.19,PB.7325.10,PB.7325.12,PB.7325.14,PB.7325.24
Ppup119400	27	PB.3872.1,PB.3872.26,PB.3872.2,PB.3872.11,PB.3872.13,PB.3872.14,PB.3872.15,PB.3872.16,PB.3872.17,PB.3872.19,PB.3872.20,PB.3872.21,PB.3872.22,PB.3872.23,PB.3872.24,PB.3872.29,PB.3872.3,PB.3872.32,PB.3872.34,PB.3872.35,PB.3872.36,PB.3872.37,PB.3872.4,PB.3872.43,PB.3872.7,PB.3872.8,PB.3872.45
Ppup119950	6	PB.3904.4,PB.3904.1,PB.3904.3,PB.3904.7,PB.3904.8,PB.3904.13
Ppup120430	1	PB.3945.1
Ppup120440	7	PB.3946.3,PB.3946.2,PB.3946.6,PB.3946.8,PB.3946.10,PB.3946.4,PB.3946.7
Ppup161360	2	PB.7398.2,PB.7398.1
Ppup162510	1	PB.7464.1
Ppup081600	24	PB.3960.71,PB.3960.75,PB.3960.80,PB.3960.81,PB.3960.69,PB.3960.79,PB.3960.64,PB.3960.67,PB.3960.70,PB.3960.73,PB.3960.76,PB.3960.78,PB.3960.65,PB.3960.66,PB.3960.72,PB.3960.74,PB.3960.82,PB.3960.96,PB.3960.97,PB.3960.89,PB.3960.92,PB.3960.90,PB.3960.95,PB.3960.101
novelGenePB.3969	2	PB.3969.4,PB.3969.6
Ppup082330	2	PB.4008.1,PB.4008.2
Ppup083210	8	PB.4076.10,PB.4076.1,PB.4076.2,PB.4076.3,PB.4076.7,PB.4076.8,PB.4076.9,PB.4076.5
Ppup083750	3	PB.4104.6,PB.4104.1,PB.4104.20
novelGenePB.4119	1	PB.4119.1
Ppup084180	1	PB.4127.2
Ppup084780	2	PB.4167.2,PB.4167.15
Ppup085010	2	PB.4182.1,PB.4182.4
Ppup162910	1	PB.7507.1
Ppup042120	3	PB.7559.1,PB.7559.2,PB.7559.4
Ppup131580	2	PB.4337.5,PB.4337.7
Ppup131990	1	PB.4366.1
Ppup132210	1	PB.4387.2
Ppup163540	18	PB.7579.1,PB.7579.2,PB.7579.32,PB.7579.18,PB.7579.13,PB.7579.14,PB.7579.16,PB.7579.17,PB.7579.22,PB.7579.23,PB.7579.24,PB.7579.25,PB.7579.26,PB.7579.29,PB.7579.30,PB.7579.7,PB.7579.8,PB.7579.6
Ppup164310	1	PB.7616.4
Ppup164480_Ppup164470	1	PB.7738.1
Ppup042420	2	PB.7750.2,PB.7750.1
Ppup132950	1	PB.4418.4
Ppup133440	4	PB.4455.27,PB.4455.16,PB.4455.1,PB.4455.28
Ppup133780	8	PB.4482.1,PB.4482.12,PB.4482.14,PB.4482.25,PB.4482.17,PB.4482.19,PB.4482.20,PB.4482.16
Ppup133960	13	MSTRGVenom.3091.1,PB.4495.21,PB.4495.22,PB.4495.25,PB.4495.28,PB.4495.24,PB.4495.31,PB.4495.32,PB.4495.33,PB.4495.36,PB.4495.44,PB.4495.47,PB.4495.48
Ppup134390	13	PB.4523.1,PB.4523.2,PB.4523.5,PB.4523.10,PB.4523.11,PB.4523.15,PB.4523.16,PB.4523.17,PB.4523.18,PB.4523.19,PB.4523.7,PB.4523.8,PB.4523.22
Ppup113130	6	PB.1123.7,PB.1123.2,PB.1123.4,PB.1123.16,PB.1123.17,PB.1123.24
Ppup114520	6	PB.1196.84,PB.1196.76,PB.1196.77,PB.1196.82,PB.1196.85,PB.1196.80
Ppup157440	1	PB.7790.1
Ppup047900	1	PB.4596.1
Ppup048440	5	PB.4630.7,PB.4630.8,PB.4630.1,PB.4630.5,PB.4630.18
Ppup001840	10	PB.8004.11,PB.8004.12,PB.8004.5,PB.8004.6,PB.8004.7,PB.8004.8,PB.8004.2,PB.8004.3,PB.8004.4,PB.8004.1
Ppup166070	4	PB.4892.4,PB.4892.7,PB.4892.2,PB.4892.6
Ppup166710	5	PB.4942.1,PB.4942.2,PB.4942.3,PB.4942.4,PB.4942.5
Ppup167500	4	PB.4994.5,PB.4994.1,PB.4994.2,PB.4994.6
Ppup167750	18	PB.5008.32,PB.5008.35,PB.5008.30,PB.5008.1,PB.5008.18,PB.5008.2,PB.5008.22,PB.5008.23,PB.5008.25,PB.5008.26,PB.5008.28,PB.5008.29,PB.5008.33,PB.5008.5,PB.5008.6,PB.5008.7,PB.5008.9,PB.5008.15
Ppup168100	8	PB.5025.5,PB.5025.13,PB.5025.11,PB.5025.14,PB.5025.15,PB.5025.16,PB.5025.17,PB.5025.20
Ppup168280	15	PB.5032.1,PB.5032.3,PB.5032.4,PB.5032.5,PB.5032.10,PB.5032.11,PB.5032.6,PB.5032.7,PB.5032.9,PB.5032.14,PB.5032.15,PB.5032.17,PB.5032.19,PB.5032.25,PB.5032.27
Ppup168800	3	PB.5058.3,PB.5058.1,PB.5058.2
Ppup169270	2	PB.5088.3,PB.5088.5
Ppup169650	4	PB.5113.1,PB.5113.3,PB.5113.4,PB.5113.6
Ppup002680	8	PB.5153.10,PB.5153.1,PB.5153.2,PB.5153.3,PB.5153.4,PB.5153.5,PB.5153.6,PB.5153.7
Ppup002810	7	PB.5163.1,PB.5164.11,PB.5164.12,PB.5164.4,PB.5164.8,PB.5164.7,PB.5164.13
Ppup003240	6	PB.5206.1,PB.5206.2,PB.5206.3,PB.5206.4,PB.5206.5,PB.5206.6
novelGeneAS127	7	PB.5270.1,PB.5270.2,PB.5270.3,PB.5270.8,PB.5270.6,PB.5270.9,PB.5270.11
Ppup099330	2	PB.8076.1,PB.8076.2
Ppup053430	13	PB.5394.2,PB.5394.1,PB.5394.6,PB.5394.7,PB.5394.5,PB.5394.14,PB.5394.8,PB.5394.13,PB.5394.9,PB.5394.15,PB.5394.19,PB.5394.32,PB.5394.30
Ppup054570	1	PB.5479.1
Ppup153050	1	PB.8166.1
Ppup018070	1	PB.5532.2
Ppup018640	2	PB.5570.3,PB.5570.4
Ppup018650	12	PB.5571.10,PB.5571.1,PB.5571.11,PB.5571.12,PB.5571.13,PB.5571.14,PB.5571.16,PB.5571.19,PB.5571.2,PB.5571.4,PB.5571.6,PB.5571.8
Ppup019220	6	PB.5616.1,PB.5616.2,PB.5616.4,PB.5616.5,PB.5616.6,PB.5616.3
Ppup019470	3	PB.5636.2,MSTRGVenom.5083.1,MSTRGVenom.5083.11
Ppup121980	1	PB.1295.1
Ppup122280	1	PB.1317.1
Ppup122720	2	PB.1376.86,PB.1376.87
Ppup123250	5	PB.1376.215,PB.1376.214,PB.1376.213,PB.1376.217,PB.1376.219
Ppup124130	1	PB.1410.1
Ppup124290	8	PB.1424.5,PB.1424.2,PB.1424.1,PB.1424.3,PB.1424.4,PB.1424.8,PB.1424.9,PB.1424.6
Ppup124480	2	PB.1437.1,PB.1437.3
novelGenePB.1444	1	PB.1444.1
novelGeneAS150	3	PB.1462.1,PB.1463.2,PB.1463.3
Ppup070950	3	PB.5658.4,PB.5658.5,PB.5658.6
Ppup071400	9	PB.5682.1,PB.5682.11,PB.5682.12,PB.5682.13,PB.5682.4,PB.5682.5,PB.5682.7,PB.5682.8,PB.5682.9
Ppup033820	1	PB.8245.1
novelGenePB.5711	9	PB.5711.25,PB.5711.19,PB.5711.8,PB.5711.6,PB.5711.7,PB.5711.3,PB.5711.18,PB.5711.2,PB.5711.26
Ppup136900	9	PB.5722.5,PB.5722.12,PB.5722.13,PB.5722.14,PB.5722.15,PB.5722.16,PB.5722.17,PB.5722.7,PB.5722.19
Ppup019930	20	PB.5750.2,PB.5751.35,PB.5751.33,PB.5751.17,PB.5751.23,PB.5751.22,PB.5751.21,PB.5751.46,PB.5751.7,PB.5751.8,PB.5751.9,PB.5751.55,PB.5751.57,PB.5751.58,PB.5751.67,PB.5751.66,PB.5751.69,PB.5751.62,PB.5751.75,PB.5751.83
Ppup021070	5	PB.5844.1,PB.5844.11,PB.5844.15,PB.5844.7,PB.5844.10
Ppup021370	4	PB.5871.1,PB.5871.5,PB.5871.6,PB.5871.7
Ppup170480	1	PB.8284.2
Ppup101360	1	PB.8354.3
Ppup006060	5	PB.1736.1,PB.1736.6,PB.1736.7,PB.1736.13,PB.1736.14
Ppup006300	1	PB.1757.1
Ppup006390	2	PB.1766.1,PB.1766.2
Ppup006550	2	PB.1780.2,PB.1780.5
Ppup006730	3	PB.1795.1,PB.1795.2,PB.1795.3
Ppup010390	5	PB.1999.1,PB.1999.2,PB.1999.3,PB.1999.7,PB.1999.9
Ppup011040	2	PB.2036.1,PB.2036.2
Ppup011140	2	PB.2041.1,PB.2041.2
novelGenePB.5980	2	PB.5980.1,PB.5980.2
Ppup034570_Ppup034580	3	PB.5983.10,PB.5983.14,PB.5983.23
Ppup024540	4	PB.2132.4,PB.2132.2,PB.2132.5,PB.2132.6
Ppup024890	2	PB.2151.1,PB.2151.2
Ppup025090	2	PB.2156.1,PB.2156.2
Ppup025640	4	PB.2185.1,PB.2185.5,PB.2185.8,PB.2185.17
Ppup025730	5	PB.2193.6,PB.2193.4,PB.2193.3,PB.2193.2,PB.2193.5
Ppup026150	2	PB.2219.1,PB.2219.2
Ppup028750	3	PB.2413.1,PB.2413.3,PB.2413.2
Ppup117110	15	PB.6051.1,PB.6051.2,PB.6051.9,PB.6051.10,PB.6051.12,PB.6051.13,PB.6051.14,PB.6051.15,PB.6051.16,PB.6051.17,PB.6051.4,PB.6051.5,PB.6051.7,PB.6051.6,PB.6051.20
Ppup117160	3	PB.6055.1,PB.6055.7,PB.6055.13
Ppup137170	1	PB.8450.2
Ppup170900	2	PB.8456.1,PB.8456.2
Ppup035100	7	PB.6156.1,PB.6156.4,PB.6156.5,PB.6156.6,PB.6156.9,PB.6156.8,PB.6156.11
Ppup057560	2	PB.2443.1,PB.2443.4
Ppup057710	10	PB.2454.10,PB.2454.11,PB.2454.3,PB.2454.4,PB.2454.5,PB.2454.6,PB.2454.8,PB.2454.1,PB.2454.2,PB.2454.12
Ppup058210	1	PB.2495.1
Ppup059490	4	PB.2580.5,PB.2580.3,PB.2580.2,PB.2580.1
Ppup059510	6	PB.2581.2,PB.2581.3,PB.2581.4,PB.2581.5,PB.2581.6,PB.2581.1
novelGenePB.2583	2	PB.2583.1,PB.2583.2
Ppup059810	1	PB.2599.1
Ppup060190	2	PB.2622.1,PB.2622.2
Ppup172530	1	PB.2662.2
Ppup173360	3	PB.2704.1,PB.2704.2,PB.2704.3
Ppup174560	1	PB.2803.1
Ppup174940	1	PB.2825.1
Ppup175010	2	PB.2831.2,PB.2831.1
Ppup175270	8	PB.2851.1,PB.2851.2,PB.2851.3,PB.2851.4,PB.2851.5,PB.2851.6,PB.2851.7,PB.2851.8
Ppup175350	6	PB.2856.1,PB.2856.11,PB.2856.2,PB.2856.3,PB.2856.4,PB.2856.5
Ppup175370	3	MSTRG.10666.1,MSTRG.10666.2,PB.2857.1
Ppup149470	2	PB.6340.1,PB.6340.3
Ppup103170	2	PB.6368.1,PB.6368.2
Ppup037540	6	PB.6420.1,PB.6420.13,PB.6420.2,PB.6420.18,PB.6420.22,PB.6420.8
Ppup092220	3	PB.2988.1,PB.2988.3,PB.2988.2
Ppup093230	9	PB.3073.3,PB.3073.5,PB.3073.6,PB.3073.7,PB.3073.8,PB.3073.9,PB.3073.15,PB.3073.17,PB.3073.13
Ppup093570	3	PB.3101.2,PB.3101.1,PB.3101.5
Ppup095690	9	PB.3227.3,PB.3227.2,PB.3227.4,PB.3227.1,PB.3227.6,PB.3227.10,PB.3227.8,PB.3227.9,PB.3227.13
Ppup175750	5	PB.6491.2,PB.6491.3,PB.6491.4,PB.6491.5,PB.6491.6
Ppup040060	6	PB.3351.10,PB.3351.9,PB.3351.3,PB.3351.4,PB.3351.11,PB.3351.12
Ppup040410	2	PB.3375.6,PB.3375.4
Ppup176160	4	PB.6522.1,PB.6522.3,PB.6522.4,PB.6522.6
Ppup176170	19	PB.6524.10,PB.6524.1,PB.6524.11,PB.6524.12,PB.6524.13,PB.6524.14,PB.6524.2,PB.6524.3,PB.6524.4,PB.6524.18,PB.6524.19,PB.6524.20,PB.6524.22,PB.6524.23,PB.6524.25,PB.6524.26,PB.6524.27,PB.6524.28,PB.6524.31
Ppup176270	7	PB.6531.10,PB.6531.1,PB.6531.2,PB.6531.12,PB.6531.26,PB.6531.29,PB.6531.31
Ppup176290	2	PB.6533.2,PB.6533.1
Ppup014060	2	PB.6558.1,PB.6558.2
Ppup014140	2	PB.6563.3,PB.6563.1
Ppup097100_PB.6855	2	PB.6855.1,PB.6855.2
Ppup097100_PB.6857	3	PB.6857.5,PB.6857.1,PB.6857.2
novelGeneAS210	21	PB.2452.1,PB.2452.6,PB.2452.10,PB.2452.13,PB.2452.14,PB.2452.16,PB.2452.18,PB.2452.19,PB.2452.20,PB.2452.25,PB.2452.27,PB.2452.3,PB.2452.4,PB.2452.8,PB.2452.11,PB.2452.12,PB.2452.22,PB.2452.23,PB.2452.24,PB.2452.5,PB.2452.28
