# Supplementary material for: Comprehensive isoform-level analysis reveals the contribution of alternative isoforms to venom evolution and repertoire diversity
Source: HighWire-hosted journal article supplement (doi:10.1101/gr.277707.123), 2023-09-01
Supplement: Supplemental_Tables_S1_to_S19.zip [file Supplemental_Table_S15.xlsx]

## Sheet: Sheet1
Supplemental Table S15. Isoforms with significantly differential usage patterns (difference in isoform fraction > 0.4, FDR-adjusted p < 0.05)
gene_ref	isoform_id	gene_id	IF_overall	IF1	IF2	dIF	isoform_switch_q_value	gene_switch_q_value	log2medCarcass	log2medVenom
geneComp_00001725	PB.1879.236	Ppup008030_Ppup008170	0.5	0	1	1	3.28381e-10	1.5389e-14	0	0.812146
geneComp_00001726	PB.1879.290	Ppup008030_Ppup008190	0.5	0	1	1	7.91734e-10	3.18841e-14	0	0.58486
geneComp_00001733	PB.1879.283	Ppup008030_Ppup008300	0.5	0	1	1	3.42284e-16	1.10054e-18	0	1.26513
geneComp_00001734	PB.1879.247	Ppup008030_Ppup008310	0.5	0	1	1	1.56397e-14	1.86447e-22	0	0.917627
geneComp_00001760	PB.1879.214	Ppup008230_Ppup008030	0.5	0	1	1	1.61203e-13	9.07944e-16	0	0.926893
geneComp_00001766	PB.1879.281	Ppup008350_Ppup008030	0.5	0	1	1	2.93445e-14	6.54959e-18	0	1.05589
geneComp_00002293	PB.7156.2	Ppup015700_Ppup015670	0.50805	0.0218333	0.994267	0.972433	9.92025e-09	9.92025e-09	0	1.67255
geneComp_00000508	PB.2155.16	novelGenePB.2155	0.505383	0.0248	0.985967	0.961167	1.64898e-11	1.78259e-12	0.863331	4.34528
geneComp_00014265	PB.4810.9	Ppup165030	0.48225	0.0019	0.9626	0.9607	5.22623e-22	2.02927e-36	0.334399	4.73732
geneComp_00000148	PB.1463.3	novelGeneAS150	0.529	0.0590667	0.998933	0.939867	1.82929e-19	1.82929e-19	2.90518	11.8778
geneComp_00003735	PB.8098.2	Ppup033060	0.497567	0.0303	0.964833	0.934533	3.43171e-37	9.05671e-44	1.15528	0.437433
geneComp_00001851	PB.1930.2	Ppup009440	0.484917	0.0216333	0.9482	0.926567	5.50239e-261	5.50239e-261	2.27254	6.18822
geneComp_00006272	PB.3823.3	Ppup064390_Ppup064360	0.5402	0.0804	1	0.9196	7.00206e-29	3.98604e-30	2.84196	1.29078
geneComp_00008723	MSTRG.11371.2	Ppup096140_Ppup096150	0.457433	0.00163333	0.913233	0.9116	3.44389e-09	2.35284e-09	0	2.0167
geneComp_00000895	PB.7086.4	novelGenePB.7086	0.507417	0.0534667	0.961367	0.9079	1.69007e-105	1.69007e-105	2.90833	5.67638
geneComp_00012034	PB.8073.10	Ppup136110	0.520367	0.0687	0.972033	0.903333	3.63696e-26	1.62428e-38	1.52215	4.94052
geneComp_00007652	PB.4080.5	Ppup083320	0.44925	0	0.8985	0.8985	9.44829e-06	9.44829e-06	0	0.803825
geneComp_00002713	PB.5804.2	Ppup020600	0.549433	0.100533	0.998333	0.8978	1.48748e-05	1.48748e-05	1.23023	6.43846
geneComp_00005728	PB.2454.3	Ppup057710	0.492117	0.0432333	0.941	0.897767	9.20726e-13	9.20726e-13	1.02633	9.75481
geneComp_00007611	PB.4050.10	Ppup082890	0.557067	0.114133	1	0.885867	5.38383e-57	7.96163e-59	2.77435	2.03255
geneComp_00001752	PB.1879.202	Ppup008030_Ppup008580	0.436583	0	0.873167	0.873167	1.04479e-07	1.04479e-07	0	1.98832
geneComp_00007241	PB.7110.3	Ppup077490	0.5623	0.126933	0.997667	0.870733	2.02353e-35	2.02353e-35	0.283381	7.41939
geneComp_00003133	PB.2187.1	Ppup025660	0.44845	0.0145333	0.882367	0.867833	1.24251e-100	1.24251e-100	0.616753	3.60405
geneComp_00013911	PB.7358.6	Ppup160680	0.428883	0	0.857767	0.857767	4.29776e-104	3.64912e-144	0	7.32674
geneComp_00006617	PB.7041.2	Ppup069520	0.546467	0.119233	0.9737	0.854467	6.35901e-89	6.35901e-89	2.48014	3.06139
geneComp_00009496	PB.3635.71	Ppup105880	0.47995	0.0534667	0.906433	0.852967	7.81996e-12	7.81996e-12	0.771812	3.01998
geneComp_00001409	PB.5296.4	Ppup004470	0.574217	0.148433	1	0.851567	4.05048e-17	4.05048e-17	1.05994	1.79846
geneComp_00010062	PB.1081.1	Ppup112450	0.420533	0.00263333	0.838433	0.8358	1.04042e-07	4.31894e-33	0.962561	3.00748
geneComp_00011234	PB.1584.1	Ppup126200	0.416133	0	0.832267	0.832267	4.45772e-05	4.45772e-05	0	4.06294
geneComp_00006942	PB.6316.4	Ppup074180	0.534833	0.118767	0.9509	0.832133	2.41123e-09	2.41123e-09	3.743	3.2808
geneComp_00000467	PB.1810.11	novelGenePB.1810	0.418217	0.0029	0.833533	0.830633	0	0	0.266099	7.52699
geneComp_00005897	PB.2581.4	Ppup059510	0.575733	0.161767	0.9897	0.827933	5.85291e-06	5.85291e-06	0	12.0668
geneComp_00014588	PB.5044.7	Ppup168530	0.516117	0.1073	0.924933	0.817633	2.93714e-48	2.93714e-48	3.42987	5.47181
geneComp_00000327	MSTRG.4186.1	novelGeneMSTRG.4186	0.54165	0.133633	0.949667	0.816033	6.40092e-12	6.40092e-12	0.669194	1.04409
geneComp_00005955	PB.2614.8	Ppup060170	0.40385	0	0.8077	0.8077	1.10053e-180	1.10053e-180	0	7.45109
geneComp_00013908	PB.7360.1	Ppup160640	0.417317	0.0183	0.816333	0.798033	2.06426e-47	2.06426e-47	0.723096	3.88288
geneComp_00014403	PB.4928.1	Ppup166520	0.441783	0.0443	0.839267	0.794967	3.54514e-07	3.18841e-14	1.53013	1.28919
geneComp_00003882	PB.6156.5	Ppup035100	0.396767	0	0.793533	0.793533	4.51227e-201	4.51227e-201	0	8.93336
geneComp_00011214	PB.1571.3	Ppup125990	0.498633	0.1055	0.891767	0.786267	1.0057e-42	1.0057e-42	3.1245	4.8155
geneComp_00001998	PB.2036.2	Ppup011040	0.6091	0.22	0.9982	0.7782	3.81892e-25	3.81892e-25	5.21462	8.60948
geneComp_00008261	PB.2932.1	Ppup091240	0.51805	0.129267	0.906833	0.777567	6.57904e-30	5.1873e-30	5.54885	4.451
geneComp_00010070	PB.1087.2	Ppup112530	0.47005	0.0817667	0.858333	0.776567	3.86641e-138	3.86641e-138	3.25041	3.83494
geneComp_00001773	PB.1879.63	Ppup008530_Ppup008030	0.612767	0.225533	1	0.774467	0.004551	0.00443346	3.00975	1.52477
geneComp_00002690	PB.5784.20	Ppup020370	0.439933	0.0555667	0.8243	0.768733	0.013295	0.000239416	0	2.47866
geneComp_00008861	PB.6955.3	Ppup097770	0.589133	0.204867	0.9734	0.768533	1.71756e-28	3.36158e-29	3.48325	2.0871
geneComp_00004297	PB.3352.4	Ppup040030	0.38365	0	0.7673	0.7673	2.99368e-34	2.99368e-34	0	3.80487
geneComp_00010891	PB.1337.2	Ppup122680	0.617917	0.235833	1	0.764167	7.98029e-14	2.80147e-14	1.8528	0.572941
geneComp_00000013	PB.378.3	novelGeneAS014	0.5776	0.199967	0.955233	0.755267	2.00206e-13	2.00206e-13	1.40188	9.43408
geneComp_00009755	PB.8021.5	Ppup109070	0.374283	0	0.748567	0.748567	4.4021e-152	4.4021e-152	0	6.62886
geneComp_00013276	PB.7848.1	Ppup151120	0.560833	0.187233	0.934433	0.7472	5.90367e-41	2.16654e-41	2.33298	1.81456
geneComp_00007953	PB.7658.2	Ppup086570	0.470983	0.0985333	0.843433	0.7449	3.00994e-73	1.382e-75	2.97149	2.19193
geneComp_00008480	PB.3097.3	Ppup093530	0.36995	0	0.7399	0.7399	8.93087e-146	8.93087e-146	0	4.16873
geneComp_00001363	PB.5258.19	Ppup004010_Ppup004020	0.599083	0.2318	0.966367	0.734567	5.3331e-16	5.3653e-34	2.94822	2.47815
geneComp_00010637	PB.3882.2	Ppup119540	0.428567	0.0653333	0.7918	0.726467	1.16191e-14	8.23625e-15	0.468558	1.5333
geneComp_00012243	PB.13.8	Ppup138850	0.5239	0.162533	0.885267	0.722733	1.52112e-41	1.52112e-41	3.31987	3.83221
geneComp_00009026	PB.8205.6	Ppup099850_Ppup099840	0.61585	0.255533	0.976167	0.720633	7.97459e-13	2.7471e-19	4.07659	2.8139
geneComp_00005110	PB.4703.2	Ppup049720	0.543583	0.1853	0.901867	0.716567	2.63645e-32	7.54765e-44	3.5103	1.7939
geneComp_00000594	PB.3525.4	novelGenePB.3525	0.559317	0.201467	0.917167	0.7157	0.000277647	0.000277647	5.75168	3.29735
geneComp_00003667	MSTRG.2539.1	Ppup031830	0.37175	0.0139667	0.729533	0.715567	0.00122613	0.000784612	1.78369	0.445443
geneComp_00009918	PB.963.1	Ppup110910	0.644583	0.289167	1	0.710833	2.1356e-23	1.86066e-23	2.54538	1.30423
geneComp_00005052	PB.4661.1	Ppup049080	0.57875	0.2271	0.9304	0.7033	1.4404e-18	4.92719e-19	4.35845	0.704274
geneComp_00012868	PB.512.8	Ppup145660	0.596217	0.245167	0.947267	0.7021	1.38875e-95	1.38875e-95	6.31142	4.70124
geneComp_00012449	PB.177.4	Ppup141120	0.4251	0.0752667	0.774933	0.699667	1.47946e-13	1.47946e-13	1.85194	1.18016
geneComp_00011778	PB.4433.4	Ppup133180	0.56525	0.219067	0.911433	0.692367	4.67245e-08	4.67245e-08	3.21281	0.709972
geneComp_00001727	PB.1879.40	Ppup008030_Ppup008200	0.377067	0.0334333	0.7207	0.687267	2.68017e-30	2.68017e-30	1.00158	1.42773
geneComp_00001748	PB.1879.182	Ppup008030_Ppup008540	0.657133	0.314267	1	0.685733	4.19748e-19	4.19748e-19	4.82659	0.728198
geneComp_00012591	PB.282.7	Ppup142550	0.368917	0.0261667	0.711667	0.6855	2.84458e-45	2.84458e-45	0.654617	1.85244
geneComp_00013979	PB.7403.1	Ppup161450	0.655467	0.313067	0.997867	0.6848	1.12652e-30	1.12652e-30	2.76079	1.43406
geneComp_00000372	MSTRG.7920.2	novelGeneMSTRG.7920	0.612533	0.2706	0.954467	0.683867	1.55411e-27	1.14562e-27	2.23582	1.27004
geneComp_00014677	PB.5108.1	Ppup169580	0.3649	0.0231	0.7067	0.6836	0.00902753	0.0083106	3.63804	0.746189
geneComp_00004407	PB.3434.1	Ppup041250	0.612533	0.271933	0.953133	0.6812	1.36347e-32	1.36347e-32	5.68094	5.47524
geneComp_00002621	PB.5730.1	Ppup019680	0.417917	0.0776667	0.758167	0.6805	2.61035e-43	2.61035e-43	2.13632	4.98456
geneComp_00007126	PB.6770.1	Ppup076120	0.558367	0.218833	0.8979	0.679067	2.17738e-24	2.17738e-24	2.69362	2.92637
geneComp_00003003	PB.2108.6	Ppup024220	0.338217	0	0.676433	0.676433	3.34381e-34	3.34381e-34	0	2.33764
geneComp_00007698	PB.4108.1	Ppup083820	0.53685	0.1992	0.8745	0.6753	1.77513e-31	3.5112e-32	2.61361	1.75375
geneComp_00009751	PB.8017.2	Ppup109030	0.647433	0.3103	0.984567	0.674267	9.45457e-12	9.45457e-12	5.57435	3.55884
geneComp_00010796	PB.8256.2	Ppup121600	0.585467	0.2505	0.920433	0.669933	2.91836e-08	4.26051e-18	3.18734	2.6544
geneComp_00014859	PB.2650.2	Ppup172400_Ppup172360	0.465067	0.1316	0.798533	0.666933	2.29534e-18	2.69422e-41	2.50941	4.59665
geneComp_00001739	PB.1879.35	Ppup008030_Ppup008380	0.501633	0.169167	0.8341	0.664933	1.01171e-05	4.7521e-16	3.04792	1.75501
geneComp_00003333	PB.2340.6	Ppup027810	0.416067	0.0851667	0.746967	0.6618	2.09801e-13	1.85004e-132	4.73429	3.36605
geneComp_00011279	PB.1614.2	Ppup126670	0.4944	0.1643	0.8245	0.6602	0.0115928	0.0111656	2.70573	1.86433
geneComp_00004797	PB.803.21	Ppup045890_Ppup045860	0.3663	0.0388667	0.693733	0.654867	0.0026551	3.00843e-11	0	0.934109
geneComp_00009356	PB.3521.2	Ppup104390	0.63545	0.309167	0.961733	0.652567	4.52106e-55	4.52106e-55	4.24591	4.69948
geneComp_00001273	PB.5191.2	Ppup003100	0.652117	0.3269	0.977333	0.650433	4.38949e-49	4.38949e-49	4.05051	3.20275
geneComp_00004624	PB.700.1	Ppup043830	0.42965	0.104733	0.754567	0.649833	1.17626e-66	1.17626e-66	3.63029	2.57135
geneComp_00006940	PB.6313.2	Ppup074160	0.611567	0.2868	0.936333	0.649533	2.97377e-26	2.97377e-26	3.93562	4.47024
geneComp_00012115	PB.6080.1	Ppup137260	0.575617	0.2511	0.900133	0.649033	1.16564e-11	1.16564e-11	0.594392	1.83931
geneComp_00014329	MSTRG.5543.1	Ppup165760	0.397917	0.0736667	0.722167	0.6485	0.000382264	0.000382264	0.408956	4.77772
geneComp_00005461	PB.5431.1	Ppup053940	0.602483	0.279	0.925967	0.646967	6.46223e-53	6.46223e-53	2.86517	2.29325
geneComp_00001796	PB.1899.7	Ppup008830	0.60835	0.285167	0.931533	0.646367	0.000190417	3.40254e-31	4.30548	3.07392
geneComp_00007369	PB.6614.15	Ppup079810_Ppup079800	0.622583	0.299733	0.945433	0.6457	0.0029462	0.000610815	1.27956	0.703809
geneComp_00008742	PB.6803.3	Ppup096410	0.6369	0.314933	0.958867	0.643933	0.00196173	0.000100505	0.213405	8.32312
geneComp_00012028	MSTRG.6204.1	Ppup136050	0.644517	0.323367	0.965667	0.6423	1.42119e-34	6.00649e-35	4.31085	2.21164
geneComp_00014676	PB.5107.8	Ppup169560_Ppup169570	0.677817	0.358167	0.997467	0.6393	6.47561e-68	6.47561e-68	4.64117	3.37163
geneComp_00005780	PB.2500.1	Ppup058260	0.680617	0.361233	1	0.638767	2.23556e-14	2.23556e-14	1.368	0.814221
geneComp_00000492	PB.1973.2	novelGenePB.1973	0.42535	0.106567	0.744133	0.637567	0.0287811	0.0262864	3.42432	0.265116
geneComp_00012134	PB.6098.1	Ppup137480	0.340183	0.0219333	0.658433	0.6365	8.16793e-05	7.05838e-05	3.73694	1.96067
geneComp_00007009	PB.6677.7	Ppup074950	0.386517	0.0683	0.704733	0.636433	2.50517e-206	2.50517e-206	2.80818	10.1706
geneComp_00012567	PB.261.3	Ppup142310	0.501267	0.184	0.818533	0.634533	2.25547e-104	2.93385e-109	2.77434	5.60979
geneComp_00009781	PB.8045.1	Ppup109350	0.683333	0.366667	1	0.633333	1.23059e-19	1.19879e-19	3.09458	1.2655
geneComp_00009404	PB.3561.1	Ppup104870	0.6842	0.3684	1	0.6316	6.02922e-17	6.02922e-17	1.32648	1.25429
geneComp_00005694	MSTRG.9877.11	Ppup057320	0.68455	0.3691	1	0.6309	5.86757e-20	5.86757e-20	3.33417	1.3406
geneComp_00011825	MSTRG.4078.1	Ppup133700	0.453983	0.140267	0.7677	0.627433	1.44546e-28	1.44546e-28	1.13271	2.00349
geneComp_00011117	PB.1488.2	Ppup125010	0.3127	0	0.6254	0.6254	2.21903e-92	2.21903e-92	0	3.16658
geneComp_00009910	PB.959.1	Ppup110830	0.417267	0.105267	0.729267	0.624	1.07922e-08	1.07922e-08	1.4653	2.04905
geneComp_00014525	PB.5012.8	Ppup167830	0.512967	0.202367	0.823567	0.6212	2.93194e-33	2.93194e-33	3.09308	2.80471
geneComp_00002682	PB.5779.7	Ppup020290	0.47605	0.166133	0.785967	0.619833	0.000760848	8.09789e-24	0.748845	1.63148
geneComp_00005507	PB.5465.3	Ppup054410	0.579233	0.271167	0.8873	0.616133	1.09225e-88	1.09225e-88	4.73894	3.97802
geneComp_00009866	PB.922.2	Ppup110320	0.426767	0.119067	0.734467	0.6154	8.09377e-40	1.6836e-82	3.10694	2.19842
geneComp_00008393	PB.3027.3	Ppup092600_Ppup092590	0.5365	0.228833	0.844167	0.615333	0.0133192	0.0128623	3.24843	1.45484
geneComp_00001011	PB.8364.20	novelGenePB.8364	0.307483	0	0.614967	0.614967	5.84149e-23	5.84149e-23	0	2.35587
geneComp_00008785	MSTRG.1618.2	Ppup096870	0.627367	0.3212	0.933533	0.612333	0.000525674	0.00045284	2.55176	0.191541
geneComp_00007874	PB.4231.1	Ppup085770	0.597033	0.2914	0.902667	0.611267	1.53724e-08	1.42508e-08	4.96623	2.47453
geneComp_00000084	PB.947.4	novelGeneAS085	0.305683	0.00173333	0.609633	0.6079	1.09173e-30	1.09173e-30	0	8.37164
geneComp_00014537	PB.5016.6	Ppup167970	0.4227	0.118767	0.726633	0.607867	1.00118e-29	1.95435e-45	1.129	2.02804
geneComp_00014995	PB.2745.2	Ppup173890	0.444767	0.141067	0.748467	0.6074	7.87752e-12	6.47465e-12	0.887107	1.24599
geneComp_00002221	PB.6584.2	Ppup014370	0.3427	0.0395333	0.645867	0.606333	0.00422799	0.00422799	0	1.85839
geneComp_00008385	MSTRG.11062.4	Ppup092530	0.3431	0.0400333	0.646167	0.606133	0.000168261	0.000168261	0.69334	0.57121
geneComp_00011744	PB.4408.1	Ppup132790	0.46335	0.160333	0.766367	0.606033	0.0393391	0.035431	2.16443	0.252037
geneComp_00001027	PB.8476.1	novelGenePB.8476	0.69715	0.3943	1	0.6057	3.49536e-31	3.49536e-31	3.17099	1.91091
geneComp_00003398	PB.2399.9	Ppup028500	0.546783	0.244633	0.848933	0.6043	9.07986e-31	2.67658e-51	3.29479	2.5321
geneComp_00014012	PB.7420.1	Ppup161780	0.315217	0.0132	0.617233	0.604033	3.13962e-05	3.22411e-65	1.49759	5.63188
geneComp_00001730	PB.1879.287	Ppup008030_Ppup008270	0.300717	0	0.601433	0.601433	8.42689e-36	8.42689e-36	0	1.07332
geneComp_00012804	PB.464.1	Ppup145000	0.699417	0.398833	1	0.601167	1.29437e-190	1.29437e-190	6.27829	5.07052
geneComp_00002532	PB.5574.1	Ppup018680	0.554733	0.254167	0.8553	0.601133	1.59575e-16	1.6975e-23	5.87838	3.22415
geneComp_00011233	PB.1585.3	Ppup126180_Ppup126190	0.512017	0.211767	0.812267	0.6005	3.17596e-23	3.17596e-23	3.07815	4.21651
geneComp_00007075	PB.6733.1	Ppup075610	0.348717	0.0487	0.648733	0.600033	3.25058e-75	2.10789e-75	1.54172	3.76093
geneComp_00001418	PB.5304.4	Ppup004570_Ppup004560	0.299383	0	0.598767	0.598767	2.39604e-19	2.39604e-19	0	0.41882
geneComp_00013524	PB.8477.1	Ppup154480	0.7017	0.4034	1	0.5966	2.60828e-08	2.49235e-08	6.50784	0.343998
geneComp_00014096	PB.7498.2	Ppup162780	0.4379	0.139667	0.736133	0.596467	2.89636e-40	2.89636e-40	5.15077	5.20314
geneComp_00014270	PB.4817.2	Ppup165080	0.649533	0.351333	0.947733	0.5964	1.00715e-24	3.31899e-26	6.09266	3.42952
geneComp_00002756	PB.5841.2	Ppup021030	0.554833	0.257	0.852667	0.595667	1.57554e-24	1.48488e-24	7.26242	4.99459
geneComp_00011919	PB.4549.6	Ppup134680	0.654367	0.3569	0.951833	0.594933	6.75099e-05	6.75099e-05	2.76184	2.21047
geneComp_00014028	PB.7431.2	Ppup161960	0.444117	0.146967	0.741267	0.5943	0.000499766	1.93317e-05	3.49547	1.52673
geneComp_00003877	PB.6152.6	Ppup035050	0.377583	0.0818	0.673367	0.591567	1.28305e-35	1.28305e-35	2.26899	3.07018
geneComp_00008196	MSTRG.10892.5	Ppup090590	0.322383	0.0266333	0.618133	0.5915	0.000624185	5.45091e-23	0.561887	0.853152
geneComp_00009459	PB.3605.1	Ppup105460	0.295583	0	0.591167	0.591167	1.16747e-19	1.16747e-19	0	2.00507
geneComp_00006607	MSTRG.1934.1	Ppup069420	0.487733	0.1925	0.782967	0.590467	2.76166e-10	1.08599e-10	1.68842	0.998409
geneComp_00008354	PB.2988.1	Ppup092220	0.297967	0.00346667	0.592467	0.589	4.91223e-07	4.91223e-07	0	7.04631
geneComp_00006287	PB.3830.1	Ppup064550	0.53	0.236733	0.823267	0.586533	0.00580396	0.00010224	1.02107	10.8754
geneComp_00011182	PB.1543.1	Ppup125670	0.293067	0	0.586133	0.586133	3.04117e-78	3.04117e-78	0	5.06545
geneComp_00004591	PB.668.3	Ppup043480	0.506883	0.215033	0.798733	0.5837	0.00282126	7.41515e-07	2.74951	0.622474
geneComp_00002369	PB.7892.2	Ppup016810	0.62855	0.336967	0.920133	0.583167	2.42291e-20	2.42291e-20	2.84047	3.16756
geneComp_00004760	PB.781.6	Ppup045470	0.659283	0.368133	0.950433	0.5823	4.04217e-15	1.42328e-21	4.07694	3.15752
geneComp_00008227	PB.2904.1	Ppup090910	0.377283	0.0863333	0.668233	0.5819	3.07951e-23	1.04947e-23	1.49873	1.92911
geneComp_00005350	PB.5347.11	Ppup052740	0.289367	0	0.578733	0.578733	1.62747e-46	1.62747e-46	0	3.51385
geneComp_00002638	PB.5744.2	Ppup019840	0.368117	0.0791667	0.657067	0.5779	1.87864e-39	1.87864e-39	2.62345	1.57727
geneComp_00001735	PB.1879.52	Ppup008030_Ppup008340	0.3687	0.0801667	0.657233	0.577067	1.00237e-38	5.15497e-41	1.92256	1.60423
geneComp_00012651	PB.343.5	Ppup143210	0.397	0.108767	0.685233	0.576467	5.56985e-13	7.76203e-17	1.71024	1.62734
geneComp_00001895	PB.1964.1	Ppup009930	0.677667	0.389833	0.9655	0.575667	2.08287e-08	2.08287e-08	1.94802	1.29982
geneComp_00008656	PB.3212.2	Ppup095470	0.413783	0.127933	0.699633	0.5717	2.26364e-05	2.26364e-05	2.42748	0.681356
geneComp_00004345	PB.3387.5	Ppup040580	0.30015	0.0164333	0.583867	0.567433	3.67301e-16	3.74324e-69	1.16485	2.90644
geneComp_00014864	PB.2656.2	Ppup172470	0.701233	0.419133	0.983333	0.5642	1.83608e-69	1.83608e-69	3.5832	4.91849
geneComp_00012786	PB.450.18	Ppup144820	0.518217	0.236833	0.7996	0.562767	2.52203e-05	2.62225e-18	5.0057	3.29172
geneComp_00012489	PB.206.1	Ppup141520	0.365833	0.0862333	0.645433	0.5592	2.58314e-05	2.58314e-05	2.17067	0.38001
geneComp_00001346	PB.5243.1	Ppup003850	0.657817	0.3798	0.935833	0.556033	5.65492e-17	5.65492e-17	3.6898	2.48482
geneComp_00012903	PB.542.3	Ppup146000	0.45515	0.177667	0.732633	0.554967	5.49837e-09	8.61373e-10	1.95253	3.78975
geneComp_00011934	PB.4562.1	Ppup134830	0.61715	0.3401	0.8942	0.5541	0.0125245	0.0124571	3.52421	1.69106
geneComp_00010284	PB.1219.10	Ppup114810	0.358483	0.0821333	0.634833	0.5527	2.74586e-27	2.74586e-27	3.3573	2.18491
geneComp_00011036	PB.1416.10	Ppup124190	0.301083	0.0250667	0.5771	0.552033	0.00118645	4.94919e-107	0	4.70337
geneComp_00003020	PB.2124.3	Ppup024390	0.646717	0.371167	0.922267	0.5511	3.6413e-47	3.6413e-47	3.52621	3.08247
geneComp_00004121	PB.6448.3	Ppup037970	0.2743	0	0.5486	0.5486	1.95876e-88	1.95876e-88	0	5.4036
geneComp_00008920	MSTRG.1879.2	Ppup098390	0.45995	0.1864	0.7335	0.5471	0.0137598	0.0137598	0.762854	0.662836
geneComp_00014349	PB.4879.3	Ppup165960	0.279783	0.00733333	0.552233	0.5449	3.91669e-06	3.91669e-06	1.86036	1.09066
geneComp_00012999	PB.620.3	Ppup147010	0.30035	0.0279667	0.572733	0.544767	1.70784e-53	1.70784e-53	1.384	2.3895
geneComp_00001882	PB.1952.4	Ppup009800	0.36705	0.0950667	0.639033	0.543967	4.10422e-41	4.10422e-41	3.26856	2.6279
geneComp_00015162	PB.6486.1	Ppup175660_Ppup175650	0.271633	0	0.543267	0.543267	3.51194e-40	3.51194e-40	0	2.39501
geneComp_00008657	PB.3213.2	Ppup095480	0.332883	0.0615667	0.6042	0.542633	1.58069e-14	5.71649e-19	1.58109	5.18128
geneComp_00010927	PB.1376.144	Ppup123050	0.351967	0.0809	0.623033	0.542133	0.0116272	0.0110328	0	1.42489
geneComp_00003846	PB.5983.4	Ppup034520_Ppup034500_Ppup034560	0.315783	0.0451	0.586467	0.541367	0.0037444	0.0037444	0	1.81904
geneComp_00006759	PB.5678.1	Ppup071360	0.451417	0.1824	0.720433	0.538033	0.00979955	0.00813717	2.71956	0.799739
geneComp_00012723	PB.397.5	Ppup144170	0.3943	0.1254	0.6632	0.5378	1.05368e-30	5.75042e-47	2.86841	2.32114
geneComp_00012536	PB.241.6	Ppup141990	0.660133	0.3914	0.928867	0.537467	1.60659e-44	1.60659e-44	3.94172	6.8986
geneComp_00010430	PB.6026.4	Ppup116670	0.590633	0.322	0.859267	0.537267	1.54112e-21	1.54112e-21	3.32216	1.92464
geneComp_00012183	PB.6141.1	Ppup138040	0.479017	0.2108	0.747233	0.536433	4.76676e-13	2.64821e-57	3.97624	3.22158
geneComp_00009505	PB.3643.3	Ppup105970	0.457583	0.1913	0.723867	0.532567	2.91062e-11	2.91062e-11	2.12254	1.85018
geneComp_00013530	PB.8481.2	Ppup154550	0.4439	0.1777	0.7101	0.5324	5.03331e-15	7.11625e-27	4.19515	2.62554
geneComp_00008573	PB.3150.2	Ppup094580	0.450767	0.184767	0.716767	0.532	0.00917852	2.82287e-08	4.87489	1.88247
geneComp_00001736	PB.1879.66	Ppup008030_Ppup008350	0.436333	0.170433	0.702233	0.5318	2.09996e-23	8.32095e-30	2.23599	1.74397
geneComp_00003783	PB.8138.1	Ppup033560	0.465617	0.2002	0.731033	0.530833	7.11025e-09	6.39926e-09	4.00379	2.8862
geneComp_00008331	PB.2982.2	Ppup091990	0.31145	0.0460667	0.576833	0.530767	0.00669512	6.18759e-06	2.62602	0.272439
geneComp_00008686	PB.3237.1	Ppup095790	0.64565	0.380433	0.910867	0.530433	7.6767e-36	7.34419e-49	5.64997	3.7168
geneComp_00004880	PB.857.4	Ppup046910	0.445967	0.180833	0.7111	0.530267	0.00291473	2.39019e-10	2.96091	2.2399
geneComp_00004872	PB.851.1	Ppup046820	0.533517	0.269867	0.797167	0.5273	0.0184256	0.0184256	5.05911	1.29242
geneComp_00006711	PB.5655.3	Ppup070800	0.736783	0.473567	1	0.526433	6.11209e-05	6.11209e-05	3.79478	0.868914
geneComp_00001722	PB.1879.279	Ppup008030_Ppup008140	0.262767	0	0.525533	0.525533	4.37672e-67	4.37672e-67	0	2.57422
geneComp_00013484	PB.8222.11	Ppup153690	0.692833	0.430933	0.954733	0.5238	1.48585e-22	8.67094e-33	4.10184	8.31966
geneComp_00005819	PB.2530.6	Ppup058670	0.5994	0.337633	0.861167	0.523533	1.4046e-73	1.4046e-73	4.82434	5.05414
geneComp_00014819	PB.8543.3	Ppup171800	0.365717	0.103967	0.627467	0.5235	0.0164681	0.000605183	0	4.38539
geneComp_00008682	PB.3232.2	Ppup095750	0.539617	0.278533	0.8007	0.522167	8.78448e-17	7.57659e-17	3.07352	2.80094
geneComp_00012831	PB.485.8	Ppup145260	0.41595	0.155267	0.676633	0.521367	2.12923e-30	2.12923e-30	2.43754	3.63552
geneComp_00002328	MSTRG.2404.7	Ppup016110	0.575083	0.314433	0.835733	0.5213	8.43781e-05	8.43781e-05	0.737932	0.598697
geneComp_00006274	PB.3825.3	Ppup064410	0.29525	0.0346	0.5559	0.5213	3.08409e-06	3.08409e-06	1.43228	0.284027
geneComp_00009915	PB.961.1	Ppup110880	0.3453	0.085	0.6056	0.5206	6.09405e-31	2.02861e-34	3.02259	2.3124
geneComp_00006706	PB.5654.1	Ppup070750	0.718317	0.458833	0.9778	0.518967	5.69654e-08	5.69654e-08	4.92159	4.08554
geneComp_00012602	PB.295.4	Ppup142660	0.380117	0.1215	0.638733	0.517233	6.13521e-138	6.13521e-138	5.53371	4.39319
geneComp_00003122	PB.2178.2	Ppup025540	0.71315	0.455133	0.971167	0.516033	4.09528e-19	4.32229e-23	7.61046	1.16092
geneComp_00005230	PB.4779.5	Ppup051060_Ppup051050	0.409117	0.151533	0.6667	0.515167	6.36141e-43	1.37611e-46	1.80212	3.21284
geneComp_00003087	PB.2159.6	Ppup025130	0.39945	0.141933	0.656967	0.515033	2.13028e-26	2.13028e-26	2.96057	2.41559
geneComp_00008673	PB.3224.1	Ppup095660	0.67155	0.414033	0.929067	0.515033	3.65619e-05	3.42529e-05	3.42059	0.342763
geneComp_00005731	PB.2458.25	Ppup057750	0.308367	0.0510333	0.5657	0.514667	2.96235e-104	2.96235e-104	4.41658	2.03633
geneComp_00010451	PB.6037.1	Ppup116890	0.417167	0.1613	0.673033	0.511733	1.16566e-09	1.16566e-09	3.45749	3.43007
geneComp_00009998	PB.1028.1	Ppup111770	0.716567	0.461167	0.971967	0.5108	6.29533e-26	6.29533e-26	6.05084	5.8656
geneComp_00001866	PB.1940.4	Ppup009600	0.510783	0.255567	0.766	0.510433	3.85461e-15	3.85461e-15	3.49353	2.03678
geneComp_00001996	PB.2035.2	Ppup011020	0.74535	0.4907	1	0.5093	1.75387e-33	1.75387e-33	5.38738	3.06676
geneComp_00012962	PB.593.2	Ppup146620	0.331833	0.0779333	0.585733	0.5078	1.2225e-48	1.2225e-48	2.53406	5.28224
geneComp_00001252	PB.5171.2	Ppup002890	0.656817	0.403133	0.9105	0.507367	1.35409e-33	1.35409e-33	5.14845	4.00268
geneComp_00014940	PB.2700.10	Ppup173320	0.662317	0.4091	0.915533	0.506433	5.2144e-48	1.25527e-93	6.83776	6.58274
geneComp_00004544	PB.633.5	Ppup042930	0.482483	0.229567	0.7354	0.505833	2.58148e-38	2.58148e-38	4.85315	3.18402
geneComp_00001401	PB.5288.1	Ppup004390	0.680283	0.427867	0.9327	0.504833	0.0412751	2.01894e-143	4.09703	6.15681
geneComp_00011194	PB.1553.2	Ppup125780	0.537	0.285133	0.788867	0.503733	0.0132087	0.0126653	5.16589	2.44912
geneComp_00008435	PB.3057.2	Ppup093070	0.25145	0	0.5029	0.5029	3.60244e-16	3.60244e-16	0	1.85536
geneComp_00001287	PB.5206.6	Ppup003240	0.2539	0.00246667	0.505333	0.502867	5.2644e-06	7.20328e-70	0	8.7252
geneComp_00011549	PB.7208.1	Ppup130520_Ppup130510	0.5026	0.2514	0.7538	0.5024	0.0351521	2.05856e-49	4.43821	1.42083
geneComp_00010229	PB.1190.4	Ppup114200	0.63055	0.379367	0.881733	0.502367	9.77532e-05	9.77532e-05	4.23419	3.62673
geneComp_00006618	PB.7042.1	Ppup069530	0.50785	0.2572	0.7585	0.5013	1.88809e-06	1.88809e-06	5.08662	1.39783
geneComp_00003136	PB.2191.8	Ppup025700	0.251617	0.00153333	0.5017	0.500167	3.19204e-09	5.50337e-30	0	1.90283
geneComp_00000536	PB.2583.1	novelGenePB.2583	0.322167	0.0726667	0.571667	0.499	8.41731e-15	8.41731e-15	3.33155	8.49216
geneComp_00011057	PB.1430.1	Ppup124400	0.3687	0.1194	0.618	0.4986	8.20289e-09	8.20289e-09	1.40859	1.44281
geneComp_00014646	PB.5081.2	Ppup169190	0.640633	0.391333	0.889933	0.4986	8.17793e-12	8.06359e-12	7.3852	3.85243
geneComp_00014178	PB.7595.1	Ppup163850	0.52865	0.279567	0.777733	0.498167	0.049277	0.049277	1.70862	2.09935
geneComp_00009668	PB.7311.7	Ppup107930	0.6807	0.431667	0.929733	0.498067	3.14639e-06	3.14639e-06	2.54057	0.594653
geneComp_00011604	PB.4310.1	Ppup131150	0.315717	0.0667667	0.564667	0.4979	3.31372e-20	2.07454e-20	1.53438	2.89288
geneComp_00003942	PB.6200.26	Ppup035750	0.286733	0.0381333	0.535333	0.4972	1.6419e-33	1.6419e-33	4.83433	2.5764
geneComp_00007216	PB.7089.2	Ppup077240	0.299517	0.0516667	0.547367	0.4957	3.95637e-28	3.95637e-28	3.37419	4.03754
geneComp_00012335	PB.86.9	Ppup139840	0.75215	0.5043	1	0.4957	1.48303e-19	1.48303e-19	3.27042	1.73241
geneComp_00012943	MSTRG.656.3	Ppup146410	0.371533	0.123867	0.6192	0.495333	1.85227e-06	2.45988e-09	0.959351	2.95404
geneComp_00010922	MSTRG.6949.3	Ppup123000	0.426667	0.179233	0.6741	0.494867	1.68619e-32	1.82398e-39	4.02898	2.84455
geneComp_00009381	PB.3544.13	Ppup104630	0.247017	0	0.494033	0.494033	6.73402e-132	6.73402e-132	0	2.42661
geneComp_00014404	PB.4929.2	Ppup166530	0.487	0.2411	0.7329	0.4918	0.000221832	0.000204999	5.21442	0.305056
geneComp_00012396	PB.135.16	Ppup140460	0.284183	0.0383333	0.530033	0.4917	4.1234e-53	4.1234e-53	2.05697	2.2412
geneComp_00014330	PB.4864.2	Ppup165770	0.619967	0.374867	0.865067	0.4902	0.0188012	0.0188012	3.64013	2.14305
geneComp_00011067	PB.1438.4	Ppup124500	0.274383	0.0296333	0.519133	0.4895	0.00155881	0.00155881	0.734409	1.07829
geneComp_00015002	PB.2751.3	Ppup173960	0.619967	0.375333	0.8646	0.489267	2.13078e-24	4.32342e-70	5.14639	2.87417
geneComp_00003285	PB.2310.1	Ppup027270	0.750717	0.506233	0.9952	0.488967	1.34638e-40	1.34638e-40	5.37295	4.28261
geneComp_00008390	PB.3026.2	Ppup092580	0.68405	0.4399	0.9282	0.4883	2.27797e-13	2.27797e-13	3.58757	2.02404
geneComp_00014504	PB.5001.1	Ppup167580	0.3572	0.1131	0.6013	0.4882	6.93406e-58	2.71743e-124	4.74751	4.66592
geneComp_00013881	PB.7339.2	Ppup160320	0.322867	0.0798667	0.565867	0.486	4.94488e-57	5.44689e-71	1.8623	4.76109
geneComp_00006418	PB.7982.2	Ppup066260	0.424133	0.1816	0.666667	0.485067	8.98622e-05	6.43866e-05	5.02977	0.290336
geneComp_00005017	PB.4636.3	Ppup048720	0.6634	0.422133	0.904667	0.482533	8.81599e-16	2.84383e-72	4.28289	3.74688
geneComp_00001517	PB.1729.4	Ppup005970	0.240667	0	0.481333	0.481333	1.13296e-50	1.13296e-50	0	1.34019
geneComp_00008906	PB.6988.6	Ppup098250	0.620633	0.3801	0.861167	0.481067	4.62134e-35	4.62134e-35	5.00267	4.79033
geneComp_00008511	PB.3111.5	Ppup093860	0.592733	0.352533	0.832933	0.4804	9.60263e-06	1.30211e-117	7.10635	5.95009
geneComp_00003939	PB.6198.1	Ppup035700	0.760033	0.520067	1	0.479933	9.70142e-11	9.70142e-11	4.76088	0.766231
geneComp_00012073	PB.5713.2	Ppup136730	0.556133	0.3169	0.795367	0.478467	8.95038e-06	7.33957e-06	3.40515	0.751147
geneComp_00002098	MSTRG.9861.2	Ppup012590	0.357033	0.117867	0.5962	0.478333	6.17379e-23	3.21073e-23	2.38736	2.77188
geneComp_00013671	PB.7621.1	Ppup156960	0.558883	0.319833	0.797933	0.4781	8.49252e-05	2.27443e-15	6.58894	4.35275
geneComp_00004252	PB.3323.3	Ppup039560	0.674917	0.436567	0.913267	0.4767	0.00452553	0.00102791	5.85711	1.85983
geneComp_00007046	PB.6707.31	Ppup075330	0.238217	0	0.476433	0.476433	0.0146598	8.84263e-05	0	2.13628
geneComp_00010253	PB.1204.3	Ppup114470	0.626317	0.3884	0.864233	0.475833	1.42326e-11	1.42326e-11	5.09014	3.54941
geneComp_00006169	PB.3755.1	Ppup063260	0.737383	0.499733	0.975033	0.4753	6.40288e-39	1.25057e-88	6.11474	5.39054
geneComp_00002332	PB.7178.1	Ppup016140	0.683517	0.446433	0.9206	0.474167	0.00813177	0.00813177	3.80108	1.56911
geneComp_00012904	PB.543.2	Ppup146010	0.636567	0.399667	0.873467	0.4738	0.00168095	0.000137543	3.58561	2.47641
geneComp_00002912	PB.8379.1	Ppup023000	0.64715	0.4105	0.8838	0.4733	1.33834e-07	1.33834e-07	2.30798	3.11515
geneComp_00007640	PB.4075.31	Ppup083190	0.298867	0.0626667	0.535067	0.4724	0.000580205	2.31572e-24	0	9.01974
geneComp_00010135	PB.1130.5	Ppup113230	0.559017	0.323133	0.7949	0.471767	1.68304e-06	6.45006e-22	3.10283	4.34711
geneComp_00001521	PB.1732.4	Ppup006000_Ppup006010	0.36075	0.124933	0.596567	0.471633	8.95041e-12	7.29112e-76	3.42281	3.4207
geneComp_00001729	PB.1879.208	Ppup008030_Ppup008260	0.725233	0.491233	0.959233	0.468	0.0117204	0.0117204	4.57299	2.2963
geneComp_00001945	PB.2003.3	Ppup010470	0.233917	0	0.467833	0.467833	0.0127186	0.00628393	0	0.41031
geneComp_00009811	PB.880.1	Ppup109740_Ppup109730	0.727367	0.4949	0.959833	0.464933	1.49632e-36	1.49632e-36	1.83628	4.12927
geneComp_00014401	PB.4923.1	Ppup166500	0.364633	0.1328	0.596467	0.463667	4.10522e-38	8.55326e-42	3.82297	3.46374
geneComp_00008833	PB.6935.3	Ppup097480	0.273017	0.0426333	0.5034	0.460767	0.0171939	2.68377e-15	2.11415	2.33692
geneComp_00000176	PB.1789.1	novelGeneAS179	0.7315	0.5014	0.9616	0.4602	9.55997e-14	1.21472e-14	6.97165	5.23055
geneComp_00003385	PB.2388.1	Ppup028360	0.499833	0.269767	0.7299	0.460133	6.17723e-95	6.17723e-95	6.9486	5.71185
geneComp_00012800	PB.461.6	Ppup144960	0.226517	0	0.453033	0.453033	2.93282e-151	2.93282e-151	0	5.79466
geneComp_00009475	PB.3617.1	Ppup105670	0.4304	0.204833	0.655967	0.451133	6.49636e-17	4.72109e-17	3.7926	2.85042
geneComp_00011800	PB.4455.16	Ppup133440	0.362283	0.136933	0.587633	0.4507	3.01395e-17	8.72174e-31	9.61698	6.74713
geneComp_00014490	MSTRG.5690.2	Ppup167430	0.6477	0.422367	0.873033	0.450667	0.000955932	0.000955932	2.34458	1.13993
geneComp_00008759	PB.6817.3	Ppup096600	0.487783	0.262833	0.712733	0.4499	0.0116775	0.0103974	1.93894	0.283723
geneComp_00003599	PB.7242.3	Ppup031130	0.6963	0.471733	0.920867	0.449133	0.000931316	0.000931316	4.32318	2.07638
geneComp_00001150	PB.7997.7	Ppup001770_Ppup001780	0.224483	0	0.448967	0.448967	9.32284e-28	9.32284e-28	0	1.4807
geneComp_00013361	PB.7923.5	Ppup152100	0.223617	0	0.447233	0.447233	1.70667e-31	1.70667e-31	0	3.41742
geneComp_00001921	PB.1982.3	Ppup010210	0.388133	0.165133	0.611133	0.446	2.74271e-06	1.90171e-07	3.23932	3.08955
geneComp_00001988	PB.2027.9	Ppup010920	0.404267	0.181267	0.627267	0.446	0.00293003	9.13672e-08	1.61168	2.09214
geneComp_00001923	PB.1985.2	Ppup010230	0.389383	0.166667	0.6121	0.445433	1.5206e-09	1.77592e-20	5.35613	2.23053
geneComp_00002374	PB.7898.1	Ppup016860	0.586717	0.364	0.809433	0.445433	9.48692e-10	9.39089e-10	5.95258	3.74676
geneComp_00014499	PB.4997.2	Ppup167530	0.54095	0.318567	0.763333	0.444767	0.000833783	0.000833783	5.18153	0.840702
geneComp_00005329	PB.5329.6	Ppup052530	0.356967	0.135567	0.578367	0.4428	3.77083e-42	3.77083e-42	4.47509	3.73816
geneComp_00014953	PB.2709.4	Ppup173440	0.483033	0.261733	0.704333	0.4426	5.82199e-15	5.82199e-15	3.67243	1.68689
geneComp_00002801	PB.5884.1	Ppup021490	0.581933	0.360933	0.802933	0.442	4.28977e-05	1.28405e-25	3.56317	2.58731
geneComp_00003194	PB.2232.1	Ppup026330	0.779267	0.558533	1	0.441467	9.85392e-52	9.85392e-52	4.21592	3.79562
geneComp_00006226	PB.3793.3	Ppup063850	0.261367	0.0406333	0.4821	0.441467	0.0193416	0.0151955	0.403007	0.542664
geneComp_00002927	PB.8386.1	Ppup023200	0.46095	0.240967	0.680933	0.439967	0.00445442	0.00445442	3.52567	0.56184
geneComp_00012724	PB.398.12	Ppup144180	0.594467	0.3752	0.813733	0.438533	0.0017893	6.00443e-06	6.22205	1.37384
geneComp_00006304	MSTRG.2272.2	Ppup064740	0.4404	0.222133	0.658667	0.436533	6.63954e-07	2.63859e-13	2.68774	0.545241
geneComp_00000493	PB.1974.3	novelGenePB.1974	0.64575	0.427967	0.863533	0.435567	0.000158552	0.000144739	4.72997	0.84485
geneComp_00003371	PB.2373.2	Ppup028210	0.351783	0.134067	0.5695	0.435433	1.49942e-22	5.12717e-41	3.57679	3.32993
geneComp_00005107	PB.4702.2	Ppup049670_Ppup049680	0.582983	0.365567	0.8004	0.434833	4.59028e-39	9.53222e-131	1.54391	10.1287
geneComp_00002038	PB.2072.2	Ppup011490	0.749	0.532033	0.965967	0.433933	4.28469e-10	4.28469e-10	3.24092	1.15832
geneComp_00008296	PB.2955.1	Ppup091630	0.50715	0.2906	0.7237	0.4331	9.18088e-12	9.62756e-30	4.82727	3.03697
geneComp_00005162	PB.4736.3	Ppup050320	0.215467	0	0.430933	0.430933	1.90561e-19	1.90561e-19	0	0.871
geneComp_00009522	PB.3661.1	Ppup106150	0.29585	0.0806333	0.511067	0.430433	1.13017e-22	1.2966e-23	1.50901	1.72374
geneComp_00005936	PB.2609.5	Ppup059940	0.5976	0.382933	0.812267	0.429333	4.92526e-30	2.47836e-55	4.34196	4.91769
geneComp_00005087	PB.4688.2	Ppup049430	0.27955	0.0654667	0.493633	0.428167	1.31827e-19	7.87972e-20	1.50527	2.84205
geneComp_00015024	PB.2775.1	Ppup174210	0.695483	0.481633	0.909333	0.4277	0.0166627	0.0166627	4.25781	1.62571
geneComp_00000992	PB.8189.2	novelGenePB.8189	0.3712	0.157533	0.584867	0.427333	5.37193e-15	5.37193e-15	1.49031	1.87729
geneComp_00004356	PB.3395.6	Ppup040690	0.2322	0.0186333	0.445767	0.427133	0.000383316	1.05732e-54	0.768206	2.277
geneComp_00004121	PB.6448.2	Ppup037970	0.222883	0.0100667	0.4357	0.425633	5.92022e-34	1.95876e-88	0.287348	5.00985
geneComp_00001598	PB.1799.1	Ppup006810	0.5263	0.313967	0.738633	0.424667	2.47268e-05	2.47268e-05	3.07551	2.22648
geneComp_00010442	PB.6035.7	Ppup116790	0.22085	0.009	0.4327	0.4237	2.06212e-48	2.06212e-48	0.484522	2.81877
geneComp_00001240	PB.5160.1	Ppup002780	0.77235	0.560533	0.984167	0.423633	1.97821e-87	1.97821e-87	5.67402	4.3886
geneComp_00012437	PB.166.2	Ppup140970	0.4791	0.267333	0.690867	0.423533	3.67529e-07	3.67529e-07	6.40544	2.21664
geneComp_00009112	PB.8316.2	Ppup101040	0.761683	0.549933	0.973433	0.4235	7.00355e-12	5.03839e-21	5.40794	3.70337
geneComp_00004571	PB.650.2	Ppup043240	0.211633	0.000866667	0.4224	0.421533	0.00630574	0.0034314	0	0.232512
geneComp_00012657	PB.348.6	Ppup143290	0.462417	0.251733	0.6731	0.421367	1.17081e-11	2.49547e-20	2.97024	1.95009
geneComp_00015103	MSTRG.10634.3	Ppup175030	0.5237	0.3134	0.734	0.4206	3.76531e-41	3.76531e-41	3.90801	2.90669
geneComp_00001315	PB.5218.1	Ppup003540	0.790067	0.580133	1	0.419867	1.10371e-18	1.10371e-18	5.34456	3.31456
geneComp_00009785	MSTRG.6158.4	Ppup109390	0.313183	0.103733	0.522633	0.4189	1.49729e-06	1.49729e-06	1.33172	1.34961
geneComp_00009007	PB.8184.2	Ppup099640	0.720033	0.510633	0.929433	0.4188	8.45969e-19	8.22503e-29	5.34075	3.27258
geneComp_00002823	PB.5898.4	Ppup021710	0.237783	0.0284	0.447167	0.418767	5.20324e-64	2.09542e-64	2.61529	4.37236
geneComp_00004708	PB.748.2	Ppup044780	0.61685	0.407533	0.826167	0.418633	1.09798e-06	1.09798e-06	3.54265	4.15493
geneComp_00003267	PB.2294.3	Ppup027090	0.73375	0.524733	0.942767	0.418033	1.31734e-16	1.13449e-48	4.56248	6.20522
geneComp_00004040	PB.6392.5	Ppup036920	0.362817	0.1539	0.571733	0.417833	3.02796e-32	3.02796e-32	4.51172	2.76242
geneComp_00012830	PB.485.3	Ppup145250_Ppup145260	0.712333	0.5037	0.920967	0.417267	0.0113482	0.0113482	4.90938	3.08445
geneComp_00004186	MSTRG.11454.6	Ppup038770_Ppup038700	0.44315	0.234867	0.651433	0.416567	8.06179e-36	8.06179e-36	3.15859	3.60702
geneComp_00003395	PB.2397.3	Ppup028460	0.603217	0.3954	0.811033	0.415633	1.77955e-06	5.63389e-23	4.83786	5.37212
geneComp_00004943	PB.4595.3	Ppup047890	0.246617	0.0389333	0.4543	0.415367	0.0200863	2.49454e-56	2.31478	2.50026
geneComp_00005079	PB.4682.1	Ppup049350	0.7313	0.5237	0.9389	0.4152	0.0139458	2.1833e-36	6.52775	4.07806
geneComp_00013698	PB.7646.1	Ppup157290	0.711617	0.5048	0.918433	0.413633	0.0151864	4.32547e-16	4.15122	1.29462
geneComp_00010912	PB.1346.5	Ppup122880	0.421467	0.215	0.627933	0.412933	8.04248e-08	8.04248e-08	1.35682	4.62487
geneComp_00005024	PB.4644.1	Ppup048790	0.447783	0.241667	0.6539	0.412233	1.04559e-10	1.04559e-10	2.31652	2.50092
geneComp_00012356	PB.102.2	Ppup140050	0.306083	0.1	0.512167	0.412167	2.17984e-29	4.40637e-54	3.22179	3.23447
geneComp_00012212	PB.8566.4	Ppup138480	0.383367	0.1779	0.588833	0.410933	2.53579e-19	1.02028e-24	4.20712	3.28098
geneComp_00014770	MSTRG.10180.2	Ppup171080	0.723383	0.518067	0.9287	0.410633	0.00929371	0.00929371	2.49871	0.842477
geneComp_00009846	PB.903.1	Ppup110110	0.4074	0.2027	0.6121	0.4094	5.70355e-09	5.70355e-09	3.75833	2.11893
geneComp_00003310	PB.2325.1	Ppup027520	0.5854	0.380867	0.789933	0.409067	3.85117e-46	3.85117e-46	5.64424	4.52908
geneComp_00002868	PB.5929.1	Ppup022220	0.476733	0.272633	0.680833	0.4082	4.79703e-05	4.61e-05	6.18729	2.36363
geneComp_00010286	PB.1220.7	Ppup114830	0.30495	0.100867	0.509033	0.408167	1.72151e-05	1.46555e-41	3.50501	3.01721
geneComp_00011883	PB.4516.2	Ppup134310	0.787417	0.583333	0.9915	0.408167	1.40159e-18	1.40159e-18	4.52524	2.12453
geneComp_00001750	PB.1879.226	Ppup008030_Ppup008560	0.796183	0.592367	1	0.407633	1.27583e-17	1.27583e-17	4.53318	1.22466
geneComp_00005747	PB.2474.9	Ppup057910	0.3016	0.0978	0.5054	0.4076	0.000224642	1.22207e-21	2.86109	1.59615
geneComp_00010340	PB.1271.2	Ppup115390	0.796267	0.592533	1	0.407467	6.58489e-27	6.58489e-27	4.92925	4.01331
geneComp_00013476	PB.8216.3	Ppup153590	0.73215	0.5286	0.9357	0.4071	2.33035e-20	2.33035e-20	4.44449	4.30556
geneComp_00007655	PB.4082.4	Ppup083350	0.744583	0.541133	0.948033	0.4069	1.05869e-21	1.13361e-50	5.76027	3.79845
geneComp_00006855	MSTRG.8898.1	Ppup072780	0.665917	0.4625	0.869333	0.406833	0.0100305	0.0100305	3.17858	1.46547
geneComp_00001477	PB.1699.2	Ppup005540	0.790983	0.5876	0.994367	0.406767	1.30256e-10	1.30256e-10	3.31873	1.73161
geneComp_00009499	PB.3638.2	Ppup105910	0.64275	0.4394	0.8461	0.4067	3.29367e-35	3.29367e-35	3.04944	4.89267
geneComp_00013275	PB.7846.3	Ppup151110	0.655833	0.4526	0.859067	0.406467	1.32608e-11	1.32608e-11	3.73727	1.52801
geneComp_00009323	PB.3499.1	Ppup104060	0.22465	0.0214333	0.427867	0.406433	5.10579e-86	5.10579e-86	4.40802	6.50049
geneComp_00012492	PB.210.1	Ppup141550	0.340167	0.1376	0.542733	0.405133	8.01625e-14	8.01625e-14	4.66572	2.97795
geneComp_00001260	PB.5179.3	Ppup002970	0.46215	0.2597	0.6646	0.4049	1.01804e-07	1.01804e-07	3.12588	2.3782
geneComp_00012545	PB.244.57	Ppup142060_Ppup142070	0.202267	0	0.404533	0.404533	3.96351e-66	3.96351e-66	0	2.07252
geneComp_00010241	PB.1200.1	Ppup114330_Ppup114340	0.271317	0.0692	0.473433	0.404233	2.60529e-70	1.41412e-70	3.90015	4.94101
geneComp_00012378	PB.120.5	Ppup140280	0.363317	0.161267	0.565367	0.4041	4.84358e-15	2.17125e-23	3.37655	2.98154
geneComp_00011025	PB.1406.3	Ppup124080	0.481967	0.280033	0.6839	0.403867	5.38922e-25	4.47512e-25	4.07983	3.07751
geneComp_00011036	PB.1416.5	Ppup124190	0.203817	0.00213333	0.4055	0.403367	2.48562e-40	4.94919e-107	0	4.30827
geneComp_00011810	PB.4462.3	Ppup133540	0.54565	0.344167	0.747133	0.402967	2.56307e-23	2.56307e-23	3.41588	2.58359
geneComp_00012684	PB.368.1	Ppup143620	0.21375	0.0125333	0.414967	0.402433	0.000410142	0.0003469	0.457238	1.84371
geneComp_00014470	PB.4973.2	Ppup167220	0.706967	0.505767	0.908167	0.4024	6.36742e-33	6.36742e-33	4.09547	2.92681
geneComp_00010017	PB.1043.5	Ppup111970	0.798883	0.597767	1	0.402233	4.33517e-11	4.33517e-11	3.45006	1.78045
geneComp_00001009	PB.8356.3	novelGenePB.8356	0.4883	0.287267	0.689333	0.402067	1.10312e-05	1.10312e-05	0.985732	2.15255
geneComp_00007244	PB.7112.1	Ppup077520	0.614	0.413067	0.814933	0.401867	0.000117701	1.27238e-14	5.21251	4.87936
geneComp_00002464	PB.5523.18	Ppup017950	0.246567	0.0457333	0.4474	0.401667	1.21745e-17	4.48901e-74	1.5369	4.57681
geneComp_00014021	PB.7425.1	Ppup161890	0.7993	0.5986	1	0.4014	6.63423e-32	6.63423e-32	5.84378	3.59668
geneComp_00001475	PB.1697.2	Ppup005520	0.317083	0.116667	0.5175	0.400833	6.61068e-11	5.34016e-11	2.99629	3.02154
geneComp_00004943	PB.4595.5	Ppup047890	0.320567	0.120333	0.5208	0.400467	2.49454e-56	2.49454e-56	3.49307	2.62036
geneComp_00008777	PB.6838.1	Ppup096790	0.591633	0.3914	0.791867	0.400467	1.20552e-43	1.20552e-43	5.85883	3.56299
geneComp_00010330	PB.1261.5	Ppup115290	0.259183	0.459433	0.0589333	-0.4005	0.0138034	1.58297e-10	5.67492	0
geneComp_00006757	PB.5677.9	Ppup071340	0.20035	0.4007	0	-0.4007	1.30768e-82	1.30768e-82	5.95303	0
geneComp_00001475	PB.1697.1	Ppup005520	0.682917	0.883333	0.4825	-0.400833	5.34016e-11	5.34016e-11	5.59096	2.95724
geneComp_00001319	PB.5220.5	Ppup003580	0.25675	0.457367	0.0561333	-0.401233	0.0064634	0.000978372	3.02866	0
geneComp_00014647	PB.5080.1	Ppup169200	0.261333	0.462	0.0606667	-0.401333	0.00110084	0.00110084	3.69265	0.237073
geneComp_00014021	PB.7425.4	Ppup161890	0.2007	0.4014	0	-0.4014	1.73155e-31	6.63423e-32	5.54418	0
geneComp_00014859	PB.2650.1	Ppup172400_Ppup172360	0.21485	0.415867	0.0138333	-0.402033	1.65632e-12	2.69422e-41	4.47081	0.382787
geneComp_00001009	PB.8356.1	novelGenePB.8356	0.5117	0.712733	0.310667	-0.402067	1.50938e-05	1.10312e-05	1.8052	1.20183
geneComp_00010017	PB.1043.3	Ppup111970	0.201117	0.402233	0	-0.402233	1.10593e-10	4.33517e-11	3.25945	0
geneComp_00014470	PB.4974.1	Ppup167220	0.293033	0.494233	0.0918333	-0.4024	4.95835e-32	6.36742e-33	4.11197	0.69865
geneComp_00012684	PB.368.2	Ppup143620	0.78625	0.987467	0.585033	-0.402433	0.0003469	0.0003469	4.73043	1.82834
geneComp_00011025	PB.1406.4	Ppup124080	0.518033	0.719967	0.3161	-0.403867	4.47512e-25	4.47512e-25	5.41346	2.07444
geneComp_00010241	PB.1200.2	Ppup114330_Ppup114340	0.728683	0.9308	0.526567	-0.404233	1.41412e-70	1.41412e-70	7.64923	5.06603
geneComp_00009381	PB.3544.12	Ppup104630	0.44205	0.644333	0.239767	-0.404567	3.19817e-33	6.73402e-132	6.20494	1.59681
geneComp_00003846	PB.5983.1	Ppup034520_Ppup034500_Ppup034560	0.562833	0.765667	0.36	-0.405667	0.0111657	0.0037444	2.29503	1.50519
geneComp_00009499	PB.3638.1	Ppup105910	0.35725	0.5606	0.1539	-0.4067	2.74527e-34	3.29367e-35	3.34399	2.56606
geneComp_00006855	MSTRG.8898.2	Ppup072780	0.334083	0.5375	0.130667	-0.406833	0.0107436	0.0100305	3.43149	0.409828
geneComp_00010062	PB.1081.4	Ppup112450	0.314533	0.517967	0.1111	-0.406867	0.0230059	4.31894e-33	8.00761	0.355081
geneComp_00010340	PB.1271.1	Ppup115390	0.203733	0.407467	0	-0.407467	3.53524e-26	6.58489e-27	4.43133	0
geneComp_00001750	PB.1879.78	Ppup008030_Ppup008560	0.203817	0.407633	0	-0.407633	2.37079e-17	1.27583e-17	4.03637	0
geneComp_00011883	PB.4516.1	Ppup134310	0.212583	0.416667	0.0085	-0.408167	4.61326e-18	1.40159e-18	3.98401	0
geneComp_00002868	PB.5929.4	Ppup022220	0.523267	0.727367	0.319167	-0.4082	4.61e-05	4.61e-05	7.72736	1.43588
geneComp_00012017	MSTRG.6192.1	Ppup135940	0.598067	0.802567	0.393567	-0.409	1.40878e-12	5.97625e-27	4.06038	1.73993
geneComp_00007216	PB.7089.5	Ppup077240	0.4483	0.6531	0.2435	-0.4096	5.01679e-05	3.95637e-28	6.96332	2.57658
geneComp_00008656	PB.3212.3	Ppup095470	0.3841	0.5891	0.1791	-0.41	0.0219991	2.26364e-05	4.38924	0.193191
geneComp_00014770	MSTRG.10180.1	Ppup171080	0.276617	0.481933	0.0713	-0.410633	0.0108245	0.00929371	2.47396	0
geneComp_00007004	PB.6674.1	Ppup074900	0.376333	0.581767	0.1709	-0.410867	0.0005366	1.2284e-13	2.18728	0.7151
geneComp_00005936	PB.2610.1	Ppup059940	0.3469	0.552767	0.141033	-0.411733	2.47836e-55	2.47836e-55	4.91486	2.61287
geneComp_00005024	PB.4644.3	Ppup048790	0.552217	0.758333	0.3461	-0.412233	1.10314e-10	1.04559e-10	3.77082	1.8459
geneComp_00009894	PB.942.2	Ppup110660	0.206383	0.412767	0	-0.412767	5.70504e-12	5.70504e-12	2.8421	0
geneComp_00001729	PB.1879.28	Ppup008030_Ppup008260	0.247333	0.4539	0.0407667	-0.413133	0.0170086	0.0117204	4.54522	0
geneComp_00009007	PB.8184.6	Ppup099640	0.206933	0.413867	0	-0.413867	8.22503e-29	8.22503e-29	5.13444	0
geneComp_00002823	PB.5898.6	Ppup021710	0.743683	0.950667	0.5367	-0.413967	2.09542e-64	2.09542e-64	7.4282	4.6103
geneComp_00008364	PB.2997.2	Ppup092320	0.357517	0.5646	0.150433	-0.414167	0.0029426	0.0029426	8.66951	3.56734
geneComp_00013530	PB.8481.1	Ppup154550	0.239017	0.446533	0.0315	-0.415033	7.11625e-27	7.11625e-27	5.78995	0.374977
geneComp_00014982	PB.2733.1	Ppup173740	0.46635	0.674233	0.258467	-0.415767	3.0516e-05	1.3018e-28	7.62328	3.28821
geneComp_00009895	PB.943.3	Ppup110670	0.208233	0.416467	0	-0.416467	8.41731e-15	8.41731e-15	3.97518	0
geneComp_00004595	PB.673.4	Ppup043530	0.208433	0.416867	0	-0.416867	2.03808e-21	9.73385e-22	4.15433	0
geneComp_00003968	PB.6223.8	Ppup036030	0.283717	0.4922	0.0752333	-0.416967	0.00526314	0.000233541	5.34165	0.412427
geneComp_00012830	PB.485.7	Ppup145250_Ppup145260	0.287667	0.4963	0.0790333	-0.417267	0.0117299	0.0113482	4.95724	0.864006
geneComp_00001153	PB.8000.3	Ppup001800	0.495083	0.704033	0.286133	-0.4179	9.15039e-08	5.8198e-08	5.53178	1.09285
geneComp_00011316	PB.1644.4	Ppup127050	0.442583	0.651667	0.2335	-0.418167	0.000692909	6.44261e-05	4.28214	0.487383
geneComp_00001451	PB.8394.4	Ppup005210	0.554483	0.763733	0.345233	-0.4185	0.0222963	1.80672e-09	2.86262	3.71488
geneComp_00004708	PB.748.1	Ppup044780	0.38315	0.592467	0.173833	-0.418633	1.28185e-06	1.09798e-06	3.94513	1.91129
geneComp_00005230	PB.4779.2	Ppup051060_Ppup051050	0.209567	0.419133	0	-0.419133	1.37611e-46	1.37611e-46	3.2122	0
geneComp_00001315	PB.5218.7	Ppup003540	0.209933	0.419867	0	-0.419867	2.14858e-18	1.10371e-18	5.03007	0
geneComp_00015103	MSTRG.10634.2	Ppup175030	0.4763	0.6866	0.266	-0.4206	4.07938e-41	3.76531e-41	4.97344	1.75775
geneComp_00004571	PB.650.1	Ppup043240	0.788367	0.999133	0.5776	-0.421533	0.0034314	0.0034314	9.17648	0.356415
geneComp_00000594	PB.3525.1	novelGenePB.3525	0.263367	0.474167	0.0525667	-0.4216	0.00151643	0.000277647	6.90095	0.285573
geneComp_00003003	PB.2108.1	Ppup024220	0.4316	0.643233	0.219967	-0.423267	3.58162e-10	3.34381e-34	5.81337	1.39335
geneComp_00006618	PB.7043.1	Ppup069530	0.353217	0.565033	0.1414	-0.423633	0.0221125	1.88809e-06	6.28735	0.178114
geneComp_00008266	PB.2937.1	Ppup091290	0.2227	0.435533	0.00986667	-0.425667	2.03905e-08	1.50437e-22	5.38034	0.188545
geneComp_00001241	PB.5161.2	Ppup002790	0.213033	0.426067	0	-0.426067	4.46238e-24	4.46238e-24	4.56179	0
geneComp_00009505	PB.3643.2	Ppup105970	0.3672	0.580633	0.153767	-0.426867	2.12318e-08	2.91062e-11	3.49655	0.481535
geneComp_00014054	PB.7451.12	Ppup162270	0.213533	0.427067	0	-0.427067	4.26497e-12	4.26497e-12	5.09384	0
geneComp_00015024	PB.2775.2	Ppup174210	0.304517	0.518367	0.0906667	-0.4277	0.0168461	0.0166627	4.44307	0
geneComp_00010634	PB.3878.5	Ppup119510	0.25245	0.466333	0.0385667	-0.427767	5.56873e-12	8.49565e-20	4.71173	0.826934
geneComp_00005087	PB.4688.1	Ppup049430	0.72045	0.934533	0.506367	-0.428167	7.87972e-20	7.87972e-20	4.81047	2.85098
geneComp_00011977	PB.4589.1	Ppup135300	0.249867	0.464633	0.0351	-0.429533	2.97372e-126	2.97372e-126	5.48076	1.18176
geneComp_00003267	PB.2294.4	Ppup027090	0.215	0.43	0	-0.43	1.13449e-48	1.13449e-48	4.37451	0
geneComp_00009522	PB.3661.2	Ppup106150	0.70415	0.919367	0.488933	-0.430433	1.2966e-23	1.2966e-23	4.4258	1.52956
geneComp_00007962	PB.7671.6	Ppup086670	0.21675	0.4335	0	-0.4335	1.14201e-62	1.14201e-62	5.46046	0
geneComp_00002038	PB.2071.1	Ppup011490	0.251	0.467967	0.0340333	-0.433933	1.02939e-09	4.28469e-10	2.82512	0.0208528
geneComp_00012396	PB.135.4	Ppup140460	0.22915	0.446267	0.0120333	-0.434233	1.37457e-06	4.1234e-53	5.18368	0
geneComp_00013675	PB.7625.5	Ppup157000	0.217433	0.434867	0	-0.434867	6.98218e-26	6.98218e-26	3.95312	0
geneComp_00002148	PB.6303.3	Ppup013180	0.238867	0.456333	0.0214	-0.434933	0.000515494	0.000515494	2.27243	0
geneComp_00000493	PB.1974.1	novelGenePB.1974	0.35425	0.572033	0.136467	-0.435567	0.000144739	0.000144739	5.16375	0.108482
geneComp_00003310	PB.2325.9	Ppup027520	0.230367	0.448367	0.0123667	-0.436	1.11692e-12	3.85117e-46	5.83447	0.289343
geneComp_00004115	PB.6445.4	Ppup037890	0.218133	0.436267	0	-0.436267	1.3018e-28	1.3018e-28	3.88384	0
geneComp_00003098	PB.2167.4	Ppup025260	0.630833	0.849633	0.412033	-0.4376	4.89374e-09	9.35924e-13	8.75698	3.87812
geneComp_00003222	PB.2252.4	Ppup026630	0.540933	0.7615	0.320367	-0.441133	1.67383e-26	1.67383e-26	7.16408	3.6718
geneComp_00003194	PB.2232.2	Ppup026330	0.220733	0.441467	0	-0.441467	6.34345e-49	9.85392e-52	3.99126	0
geneComp_00006226	PB.3793.2	Ppup063850	0.738633	0.959367	0.5179	-0.441467	0.0151955	0.0151955	4.90957	0.41974
geneComp_00001335	MSTRG.6041.1	Ppup003740	0.686133	0.907333	0.464933	-0.4424	4.83685e-09	2.45828e-26	8.18137	3.56087
geneComp_00001806	PB.1902.3	Ppup008930	0.2342	0.455667	0.0127333	-0.442933	6.83198e-29	6.83198e-29	5.24735	0
geneComp_00012591	PB.282.2	Ppup142550	0.37185	0.594533	0.149167	-0.445367	6.5631e-20	2.84458e-45	4.14636	0.607211
geneComp_00002374	PB.7898.2	Ppup016860	0.413283	0.636	0.190567	-0.445433	9.39089e-10	9.39089e-10	6.9062	2.13638
geneComp_00001159	PB.8005.3	Ppup001870	0.223933	0.447867	0	-0.447867	9.00372e-08	9.00372e-08	4.1472	0
geneComp_00003599	PB.7242.2	Ppup031130	0.3037	0.528267	0.0791333	-0.449133	0.00100185	0.000931316	4.39837	0.2874
geneComp_00010405	PB.6005.9	Ppup116370	0.3434	0.568333	0.118467	-0.449867	1.69322e-11	6.10922e-16	7.2572	1.87502
geneComp_00008759	PB.6817.1	Ppup096600	0.512217	0.737167	0.287267	-0.4499	0.0103974	0.0103974	3.62034	0.281113
geneComp_00014490	MSTRG.5690.1	Ppup167430	0.3523	0.577633	0.126967	-0.450667	0.00110084	0.000955932	2.43022	0.163527
geneComp_00012183	PB.6141.2	Ppup138040	0.267933	0.4934	0.0424667	-0.450933	2.64821e-57	2.64821e-57	5.24019	0.677139
geneComp_00009475	PB.3617.2	Ppup105670	0.5696	0.795167	0.344033	-0.451133	4.72109e-17	4.72109e-17	5.79282	2.07012
geneComp_00001895	PB.1964.2	Ppup009930	0.260517	0.486533	0.0345	-0.452033	2.37663e-06	2.08287e-08	2.39608	0.0294486
geneComp_00011778	PB.4433.5	Ppup133180	0.226267	0.452533	0	-0.452533	6.20377e-06	4.67245e-08	3.99695	0
geneComp_00014859	PB.2650.7	Ppup172400_Ppup172360	0.226283	0.452567	0	-0.452567	4.61681e-28	2.69422e-41	4.61363	0
geneComp_00004277	PB.3343.1	Ppup039800	0.378167	0.6049	0.151433	-0.453467	3.75601e-29	3.75601e-29	4.26582	0.77247
geneComp_00000511	PB.2176.6	novelGenePB.2176	0.3056	0.5324	0.0788	-0.4536	0.00229523	2.64637e-05	4.56505	0
geneComp_00007010	PB.6679.6	Ppup074960	0.252217	0.4807	0.0237333	-0.456967	0.00110626	1.12613e-31	5.39246	0
geneComp_00011961	PB.4578.10	Ppup135110	0.281933	0.5107	0.0531667	-0.457533	0.00068587	2.54844e-88	6.87503	0.568059
geneComp_00013538	PB.8489.10	Ppup154630	0.461717	0.690533	0.2329	-0.457633	1.63873e-23	1.63873e-23	7.0183	3.6247
geneComp_00010207	PB.1177.17	Ppup113970	0.3264	0.555567	0.0972333	-0.458333	0.0192416	8.97117e-22	4.96805	0
geneComp_00003877	PB.6152.1	Ppup035050	0.508333	0.737567	0.2791	-0.458467	5.92422e-18	1.28305e-35	5.18681	1.95542
geneComp_00012489	PB.206.3	Ppup141520	0.584283	0.814	0.354567	-0.459433	0.000954872	2.58314e-05	5.25053	0.305469
geneComp_00006942	PB.6316.3	Ppup074180	0.255783	0.486067	0.0255	-0.460567	0.000106742	2.41123e-09	6.08689	0.0360531
geneComp_00001945	PB.2003.1	Ppup010470	0.760617	0.9916	0.529633	-0.461967	0.00628393	0.00628393	5.32271	0.298662
geneComp_00002532	PB.5575.2	Ppup018680	0.375717	0.606733	0.1447	-0.462033	2.35773e-10	1.6975e-23	7.16379	1.07089
geneComp_00001739	PB.1879.212	Ppup008030_Ppup008380	0.23195	0.4639	0	-0.4639	4.7521e-16	4.7521e-16	4.16955	0
geneComp_00003947	PB.6206.1	Ppup035810	0.649617	0.882	0.417233	-0.464767	6.77069e-46	6.77069e-46	3.8132	4.2718
geneComp_00003285	PB.2310.5	Ppup027270	0.23325	0.4665	0	-0.4665	7.9372e-28	1.34638e-40	5.2496	0
geneComp_00004591	PB.668.4	Ppup043480	0.235317	0.470633	0	-0.470633	7.41515e-07	7.41515e-07	3.4711	0
geneComp_00005747	PB.2474.12	Ppup057910	0.235883	0.471767	0	-0.471767	1.22207e-21	1.22207e-21	4.82302	0
geneComp_00002912	PB.8379.2	Ppup023000	0.35285	0.5895	0.1162	-0.4733	2.40674e-07	1.33834e-07	2.63256	0.813227
geneComp_00010135	PB.1130.1	Ppup113230	0.265967	0.502633	0.0293	-0.473333	3.62112e-10	6.45006e-22	3.88963	0.839035
geneComp_00002958	PB.8419.1	Ppup023680	0.44675	0.683467	0.210033	-0.473433	5.99023e-14	2.32261e-27	6.80864	2.54211
geneComp_00002332	PB.7178.3	Ppup016140	0.316483	0.553567	0.0794	-0.474167	0.00829865	0.00813177	4.09238	0
geneComp_00012320	PB.72.5	Ppup139690	0.60055	0.837833	0.363267	-0.474567	3.15789e-18	3.15789e-18	4.68085	1.63972
geneComp_00012800	PB.461.4	Ppup144960	0.2503	0.488167	0.0124333	-0.475733	0.0012369	2.93282e-151	4.61216	0
geneComp_00012744	PB.412.2	Ppup144380_Ppup144390	0.393517	0.631467	0.155567	-0.4759	9.09439e-37	9.09439e-37	5.71757	3.04394
geneComp_00011800	PB.4455.1	Ppup133440	0.4217	0.6601	0.1833	-0.4768	8.72174e-31	8.72174e-31	11.8635	5.13609
geneComp_00001866	PB.1940.6	Ppup009600	0.463933	0.703	0.224867	-0.478133	4.42904e-09	3.85461e-15	4.97813	0.988914
geneComp_00002098	MSTRG.9861.1	Ppup012590	0.642967	0.882133	0.4038	-0.478333	3.21073e-23	3.21073e-23	5.20572	2.31285
geneComp_00012073	PB.5713.1	Ppup136730	0.443867	0.6831	0.204633	-0.478467	7.33957e-06	7.33957e-06	4.66104	0.345505
geneComp_00007954	PB.7660.7	Ppup086580	0.3124	0.551767	0.0730333	-0.478733	0.00444219	6.49489e-15	5.56957	0.726716
geneComp_00012532	PB.237.2	Ppup141950	0.34395	0.5834	0.1045	-0.4789	0.0180588	1.77273e-15	4.53336	0
geneComp_00007243	PB.7111.24	Ppup077510	0.2398	0.4796	0	-0.4796	9.05822e-71	9.05822e-71	5.98561	0
geneComp_00006187	PB.3769.5	Ppup063440	0.361067	0.601	0.121133	-0.479867	1.87085e-17	1.87085e-17	5.17343	1.43056
geneComp_00003939	PB.6198.2	Ppup035700	0.239967	0.479933	0	-0.479933	1.06793e-10	9.70142e-11	4.74931	0
geneComp_00003958	PB.6216.15	Ppup035920	0.260317	0.500567	0.0200667	-0.4805	4.126e-09	4.85962e-14	5.80043	0.475118
geneComp_00014353	PB.4883.7	Ppup166000	0.2606	0.502733	0.0184667	-0.484267	9.3997e-25	9.3997e-25	5.86206	0
geneComp_00014401	PB.4924.3	Ppup166500	0.617183	0.8597	0.374667	-0.485033	8.55326e-42	8.55326e-42	6.48894	3.01679
geneComp_00006418	PB.7982.1	Ppup066260	0.575867	0.8184	0.333333	-0.485067	6.43866e-05	6.43866e-05	6.91469	0
geneComp_00007733	PB.4128.7	Ppup084200_Ppup084190	0.403433	0.646367	0.1605	-0.485867	2.88523e-06	2.30816e-21	3.99374	1.31046
geneComp_00008390	PB.3026.1	Ppup092580	0.31595	0.5601	0.0718	-0.4883	4.38871e-13	2.27797e-13	3.92052	0.359717
geneComp_00004297	PB.3352.3	Ppup040030	0.276383	0.520933	0.0318333	-0.4891	0.0237755	2.99368e-34	0.878573	0.466375
geneComp_00006287	PB.3830.17	Ppup064550	0.40815	0.6529	0.1634	-0.4895	0.00010224	0.00010224	2.36432	8.39157
geneComp_00013504	PB.8360.4	Ppup154120	0.332217	0.577067	0.0873667	-0.4897	2.33566e-08	1.01233e-12	8.48113	1.40952
geneComp_00014330	PB.4864.1	Ppup165770	0.380033	0.625133	0.134933	-0.4902	0.0190635	0.0188012	4.50697	0.631252
geneComp_00014404	PB.4929.1	Ppup166530	0.513	0.7589	0.2671	-0.4918	0.000204999	0.000204999	6.89869	0.139738
geneComp_00011146	PB.1513.5	Ppup125300	0.430083	0.6764	0.183767	-0.492633	1.28261e-10	5.28866e-54	6.4089	1.86065
geneComp_00003136	PB.2191.4	Ppup025700	0.257017	0.503667	0.0103667	-0.4933	5.50337e-30	5.50337e-30	4.94506	0
geneComp_00000315	MSTRG.3109.4	novelGeneMSTRG.3109	0.247033	0.494067	0	-0.494067	6.39345e-24	6.39345e-24	1.98764	0
geneComp_00014343	PB.4874.8	Ppup165900	0.52975	0.776967	0.282533	-0.494433	7.23091e-12	7.23091e-12	6.84796	3.86197
geneComp_00010067	PB.1085.13	Ppup112500	0.2476	0.4952	0	-0.4952	2.12632e-67	4.41916e-88	5.39534	0
geneComp_00013698	PB.7646.5	Ppup157290	0.2476	0.4952	0	-0.4952	4.32547e-16	4.32547e-16	4.40305	0
geneComp_00012335	PB.86.1	Ppup139840	0.24785	0.4957	0	-0.4957	7.07298e-19	1.48303e-19	3.35931	0
geneComp_00015148	PB.2858.2	Ppup175500	0.248217	0.496433	0	-0.496433	1.10744e-119	1.10744e-119	6.83563	0
geneComp_00012536	PB.241.25	Ppup141990	0.272617	0.5214	0.0238333	-0.497567	1.72662e-30	1.60659e-44	4.37816	1.99338
geneComp_00011604	PB.4310.3	Ppup131150	0.684283	0.933233	0.435333	-0.4979	2.07454e-20	2.07454e-20	4.86419	2.33799
geneComp_00009668	PB.7311.6	Ppup107930	0.3193	0.568333	0.0702667	-0.498067	3.16865e-06	3.14639e-06	3.00993	0.041864
geneComp_00000536	PB.2583.2	novelGenePB.2583	0.677833	0.927333	0.428333	-0.499	8.4388e-15	8.41731e-15	6.46923	8.2411
geneComp_00005252	PB.4787.2	Ppup051480	0.524167	0.774033	0.2743	-0.499733	7.37363e-05	3.88948e-08	4.90602	1.275
geneComp_00014646	PB.5081.1	Ppup169190	0.35745	0.6078	0.1071	-0.5007	8.06359e-12	8.06359e-12	8.00845	1.79039
geneComp_00008833	PB.6935.4	Ppup097480	0.51495	0.7654	0.2645	-0.5009	2.68377e-15	2.68377e-15	5.54391	1.84088
geneComp_00002638	PB.5744.3	Ppup019840	0.520883	0.771733	0.270033	-0.5017	2.10818e-27	1.87864e-39	5.74897	0.861924
geneComp_00010229	PB.1190.1	Ppup114200	0.36945	0.620633	0.118267	-0.502367	0.000102451	9.77532e-05	5.219	0.912622
geneComp_00012868	PB.512.1	Ppup145660	0.29435	0.546133	0.0425667	-0.503567	2.68192e-69	1.38875e-95	7.64156	0.998523
geneComp_00010796	PB.8256.3	Ppup121600	0.28805	0.540433	0.0356667	-0.504767	0.000205718	4.26051e-18	4.29775	0.0582694
geneComp_00002691	PB.5784.3	Ppup020370_Ppup020360	0.252483	0.504967	0	-0.504967	7.73195e-26	7.73195e-26	3.39871	0
geneComp_00008101	PB.5940.7	Ppup088680_Ppup088650	0.316333	0.5694	0.0632667	-0.506133	0.00552687	4.29558e-16	4.30639	0
geneComp_00001923	PB.1986.1	Ppup010230	0.358783	0.612867	0.1047	-0.508167	0.00579407	1.77592e-20	7.10013	0.209962
geneComp_00001501	PB.1715.1	Ppup005800	0.496267	0.750633	0.2419	-0.508733	5.74215e-07	5.74215e-07	5.14456	1.9231
geneComp_00003297	MSTRG.9210.3	Ppup027390	0.6834	0.937767	0.429033	-0.508733	0.0128299	0.0128299	3.86133	0.650277
geneComp_00001996	PB.2035.3	Ppup011020	0.25465	0.5093	0	-0.5093	3.15362e-33	1.75387e-33	5.30966	0
geneComp_00012579	PB.272.4	Ppup142430	0.664283	0.919467	0.4091	-0.510367	4.60325e-12	4.60325e-12	4.28071	4.27807
geneComp_00009998	PB.1028.2	Ppup111770	0.283433	0.538833	0.0280333	-0.5108	9.26201e-26	6.29533e-26	6.13889	1.43916
geneComp_00005350	PB.5347.4	Ppup052740	0.25635	0.5127	0	-0.5127	9.47047e-09	1.62747e-46	1.93883	0
geneComp_00008673	PB.3224.2	Ppup095660	0.32845	0.585967	0.0709333	-0.515033	3.42529e-05	3.42529e-05	3.81162	0
geneComp_00003385	PB.2389.3	Ppup028360	0.36735	0.626267	0.108433	-0.517833	3.43228e-78	6.17723e-95	8.12422	3.08563
geneComp_00013979	PB.7403.3	Ppup161450	0.258967	0.517933	0	-0.517933	2.36478e-26	1.12652e-30	3.34036	0
geneComp_00006706	MSTRG.7379.3	Ppup070750	0.281683	0.541167	0.0222	-0.518967	6.61061e-08	5.69654e-08	5.07864	0.196231
geneComp_00002328	MSTRG.2404.6	Ppup016110	0.424917	0.685567	0.164267	-0.5213	0.000135004	8.43781e-05	1.47682	0.19453
geneComp_00012831	PB.485.11	Ppup145260	0.58405	0.844733	0.323367	-0.521367	2.57846e-30	2.12923e-30	4.5953	2.64425
geneComp_00011919	PB.4549.7	Ppup134680	0.291867	0.552567	0.0311667	-0.5214	0.000293654	6.75099e-05	3.25815	0
geneComp_00012441	PB.171.1	Ppup141010	0.260833	0.521667	0	-0.521667	1.36735e-16	2.15652e-23	3.09191	0
geneComp_00004797	PB.803.1	Ppup045890_Ppup045860	0.386383	0.647867	0.1249	-0.522967	3.00843e-11	3.00843e-11	4.9528	0.239879
geneComp_00008862	PB.6956.2	Ppup097780	0.3298	0.592767	0.0668333	-0.525933	0.00290239	1.03873e-18	6.84752	0.950869
geneComp_00006711	PB.5655.1	Ppup070800	0.263217	0.526433	0	-0.526433	6.25054e-05	6.11209e-05	3.9222	0
geneComp_00000443	PB.1376.99	novelGenePB.1376	0.709883	0.9735	0.446267	-0.527233	2.92653e-50	2.76778e-84	11.8077	7.10625
geneComp_00011194	PB.1553.1	Ppup125780	0.442067	0.705867	0.178267	-0.5276	0.0284173	0.0126653	6.52343	0
geneComp_00006304	MSTRG.2272.3	Ppup064740	0.264283	0.528567	0	-0.528567	2.63859e-13	2.63859e-13	4.09115	0
geneComp_00005819	PB.2530.2	Ppup058670	0.394217	0.659533	0.1289	-0.530633	4.49199e-73	1.4046e-73	5.89484	2.59768
geneComp_00003783	PB.8138.2	Ppup033560	0.534383	0.7998	0.268967	-0.530833	6.39926e-09	6.39926e-09	5.84756	1.43825
geneComp_00012243	PB.13.1	Ppup138850	0.380267	0.6458	0.114733	-0.531067	1.56466e-08	1.52112e-41	5.15724	1.46387
geneComp_00010430	PB.6026.3	Ppup116670	0.409367	0.678	0.140733	-0.537267	1.59785e-21	1.54112e-21	4.43699	0.558313
geneComp_00006759	PB.5678.2	Ppup071360	0.548583	0.8176	0.279567	-0.538033	0.00813717	0.00813717	4.46854	0.315979
geneComp_00004872	PB.851.3	Ppup046820	0.447683	0.717033	0.178333	-0.5387	0.0317488	0.0184256	6.34454	0
geneComp_00012602	PB.295.5	Ppup142660	0.293533	0.563433	0.0236333	-0.5398	0.000228352	6.13521e-138	7.72065	0.242423
geneComp_00009657	PB.7300.2	Ppup107820	0.412933	0.682967	0.1429	-0.540067	0.00827964	4.7734e-29	6.99989	0.452092
geneComp_00003122	PB.2178.4	Ppup025540	0.270317	0.540633	0	-0.540633	4.32229e-23	4.32229e-23	7.68631	0
geneComp_00008573	PB.3150.6	Ppup094580	0.392633	0.663033	0.122233	-0.5408	2.82287e-08	2.82287e-08	6.36347	0.641405
geneComp_00010927	PB.1376.143	Ppup123050	0.648033	0.9191	0.376967	-0.542133	0.0110328	0.0110328	5.29987	1.25972
geneComp_00005017	PB.4635.1	Ppup048720	0.278283	0.549933	0.00663333	-0.5433	2.84383e-72	2.84383e-72	4.67111	0.0572562
geneComp_00005778	PB.2497.3	Ppup058240	0.27205	0.5441	0	-0.5441	6.35162e-77	6.35162e-77	4.85084	0
geneComp_00012212	MSTRG.10334.1	Ppup138480	0.50695	0.780033	0.233867	-0.546167	1.02028e-24	1.02028e-24	6.16603	2.07353
geneComp_00007415	PB.6643.3	Ppup080270	0.433017	0.7062	0.159833	-0.546367	0.00176823	2.05588e-07	7.9955	0.449272
geneComp_00006893	PB.6243.7	Ppup073370	0.284783	0.558167	0.0114	-0.546767	2.40976e-08	2.40976e-08	5.3873	0
geneComp_00003371	PB.2373.5	Ppup028210	0.273483	0.546967	0	-0.546967	5.12717e-41	5.12717e-41	5.6825	0
geneComp_00008920	MSTRG.1879.1	Ppup098390	0.54005	0.8136	0.2665	-0.5471	0.0139286	0.0137598	1.82618	0.372581
geneComp_00003398	PB.2399.2	Ppup028500	0.291283	0.564933	0.0176333	-0.5473	2.67658e-51	2.67658e-51	4.72535	0.128646
geneComp_00013911	PB.7358.1	Ppup160680	0.274567	0.549133	0	-0.549133	3.64912e-144	3.64912e-144	2.80863	0
geneComp_00002373	PB.7896.3	Ppup016850	0.274683	0.549367	0	-0.549367	2.79406e-73	2.79406e-73	6.50222	0
geneComp_00012356	PB.101.3	Ppup140050	0.376983	0.652333	0.101633	-0.5507	4.40637e-54	4.40637e-54	5.90913	1.39319
geneComp_00014819	PB.8543.2	Ppup171800	0.61555	0.891033	0.340067	-0.550967	0.00479122	0.000605183	4.08958	3.89677
geneComp_00008196	MSTRG.10892.4	Ppup090590	0.2761	0.5522	0	-0.5522	5.45091e-23	5.45091e-23	4.05901	0
geneComp_00005068	PB.4674.6	Ppup049240_Ppup049230	0.3456	0.6226	0.0686	-0.554	0.00764998	0.00764998	5.17818	1.26511
geneComp_00011934	PB.4562.3	Ppup134830	0.38285	0.6599	0.1058	-0.5541	0.0124571	0.0124571	4.72734	0
geneComp_00009820	PB.887.9	Ppup109830	0.2777	0.5554	0	-0.5554	6.25231e-42	1.63509e-69	5.42808	0
geneComp_00001346	PB.5243.2	Ppup003850	0.342183	0.6202	0.0641667	-0.556033	1.0164e-16	5.65492e-17	4.28247	0.332072
geneComp_00011855	PB.4499.1	Ppup134010	0.500217	0.7784	0.222033	-0.556367	1.78951e-37	1.78951e-37	3.35673	4.43488
geneComp_00007369	PB.6614.12	Ppup079810_Ppup079800	0.31725	0.595567	0.0389333	-0.556633	0.000610815	0.000610815	1.44427	0.0308474
geneComp_00012943	MSTRG.656.1	Ppup146410	0.588017	0.867967	0.308067	-0.5599	2.45988e-09	2.45988e-09	3.08422	2.11419
geneComp_00014504	PB.5001.2	Ppup167580	0.409467	0.689633	0.1293	-0.560333	6.38573e-24	2.71743e-124	7.42599	2.62003
geneComp_00008681	PB.3231.11	Ppup095740	0.280683	0.561367	0	-0.561367	9.51995e-86	9.51995e-86	7.37542	0
geneComp_00014864	PB.2656.1	Ppup172470	0.298767	0.580867	0.0166667	-0.5642	1.23349e-66	1.83608e-69	3.97896	0.519868
geneComp_00011810	PB.4462.2	Ppup133540	0.315433	0.598033	0.0328333	-0.5652	1.04479e-07	2.56307e-23	4.17363	0.179333
geneComp_00013180	PB.6353.2	Ppup149790	0.544167	0.826833	0.2615	-0.565333	5.20581e-22	9.5528e-24	3.67947	3.26382
geneComp_00014676	PB.5107.4	Ppup169560_Ppup169570	0.2832	0.5664	0	-0.5664	1.63125e-49	6.47561e-68	5.28778	0
geneComp_00010856	PB.1376.11	Ppup122320	0.4274	0.710733	0.144067	-0.566667	6.02322e-18	6.02322e-18	4.65849	0.311886
geneComp_00005107	PB.4702.3	Ppup049670_Ppup049680	0.313633	0.5975	0.0297667	-0.567733	9.53222e-131	9.53222e-131	2.22487	5.40144
geneComp_00005507	PB.5465.14	Ppup054410	0.3554	0.640733	0.0700667	-0.570667	8.60066e-46	1.09225e-88	5.93649	1.00821
geneComp_00014506	PB.5002.14	Ppup167600	0.28535	0.5707	0	-0.5707	1.32586e-96	1.32586e-96	6.25214	0
geneComp_00011067	PB.1438.1	Ppup124500	0.6695	0.955567	0.383433	-0.572133	0.0260858	0.00155881	4.30424	1.2362
geneComp_00014403	PB.4926.1	Ppup166520	0.3212	0.608533	0.0338667	-0.574667	3.18841e-14	3.18841e-14	4.82854	0
geneComp_00001735	PB.1879.171	Ppup008030_Ppup008340	0.6313	0.919833	0.342767	-0.577067	5.15497e-41	5.15497e-41	5.07786	1.05932
geneComp_00010802	PB.8261.7	Ppup121660_Ppup121670	0.364983	0.655067	0.0749	-0.580167	0.00710939	5.41456e-09	4.20887	0
geneComp_00012999	PB.620.2	Ppup147010	0.469067	0.759433	0.1787	-0.580733	3.10292e-24	1.70784e-53	5.24994	1.22665
geneComp_00008227	PB.2904.2	Ppup090910	0.622717	0.913667	0.331767	-0.5819	1.04947e-23	1.04947e-23	4.27483	1.32494
geneComp_00012723	PB.397.1	Ppup144170	0.5728	0.8639	0.2817	-0.5822	5.75042e-47	5.75042e-47	5.4715	1.42603
geneComp_00013881	PB.7338.1	Ppup160320	0.626217	0.9177	0.334733	-0.582967	5.44689e-71	5.44689e-71	5.06569	3.89797
geneComp_00002369	PB.7892.1	Ppup016810	0.37145	0.663033	0.0798667	-0.583167	8.09977e-20	2.42291e-20	3.95183	0.75692
geneComp_00006298	PB.3842.18	Ppup064680	0.5216	0.8135	0.2297	-0.5838	1.22437e-14	1.22437e-14	6.46377	4.46337
geneComp_00015002	PB.2751.8	Ppup173960	0.3011	0.593133	0.00906667	-0.584067	4.32342e-70	4.32342e-70	5.70817	0
geneComp_00006607	MSTRG.1933.1	Ppup069420	0.512267	0.8075	0.217033	-0.590467	1.08599e-10	1.08599e-10	3.30502	0.249149
geneComp_00004345	PB.3387.6	Ppup040580	0.370633	0.6659	0.0753667	-0.590533	3.74324e-69	3.74324e-69	5.37137	1.02014
geneComp_00009751	PB.8017.10	Ppup109030	0.31095	0.606467	0.0154333	-0.591033	2.83448e-08	9.45457e-12	6.59858	0.089151
geneComp_00003096	PB.2165.1	Ppup025240_Ppup025230	0.2962	0.5924	0	-0.5924	2.81122e-06	2.81122e-06	1.86573	0
geneComp_00002756	PB.5840.1	Ppup021030	0.445167	0.743	0.147333	-0.595667	1.48488e-24	1.48488e-24	8.81493	2.43396
geneComp_00013524	PB.8477.2	Ppup154480	0.2983	0.5966	0	-0.5966	2.49235e-08	2.49235e-08	6.82147	0
geneComp_00011825	MSTRG.4078.3	Ppup133700	0.3762	0.675367	0.0770333	-0.598333	3.79026e-07	1.44546e-28	2.65969	0.432397
geneComp_00000508	PB.2155.17	novelGenePB.2155	0.30965	0.609333	0.00996667	-0.599367	2.43863e-05	1.78259e-12	4.24685	0
geneComp_00011549	PB.7208.2	Ppup130520_Ppup130510	0.299917	0.599833	0	-0.599833	2.05856e-49	2.05856e-49	5.72474	0
geneComp_00007075	PB.6732.1	Ppup075610	0.651283	0.9513	0.351267	-0.600033	2.10789e-75	2.10789e-75	5.21135	2.94278
geneComp_00008354	PB.2988.2	Ppup092220	0.6953	0.995367	0.395233	-0.600133	4.92718e-07	4.91223e-07	6.11979	6.43666
geneComp_00011233	PB.1585.1	Ppup126180_Ppup126190	0.487983	0.788233	0.187733	-0.6005	4.31853e-23	3.17596e-23	5.06425	2.29793
geneComp_00009910	PB.957.2	Ppup110830	0.570183	0.8706	0.269767	-0.600833	1.04479e-07	1.07922e-08	4.20591	0.754962
geneComp_00004624	PB.700.10	Ppup043830	0.487567	0.788067	0.187067	-0.601	8.91751e-33	1.17626e-66	6.40189	1.0429
geneComp_00001727	PB.1879.14	Ppup008030_Ppup008200	0.425367	0.726433	0.1243	-0.602133	1.87826e-17	2.68017e-30	4.53878	0.440251
geneComp_00001027	PB.8476.2	novelGenePB.8476	0.30285	0.6057	0	-0.6057	2.56802e-30	3.49536e-31	3.57628	0
geneComp_00011744	PB.4408.5	Ppup132790	0.53665	0.839667	0.233633	-0.606033	0.035431	0.035431	4.3507	0
geneComp_00014995	PB.2745.1	Ppup173890	0.555233	0.858933	0.251533	-0.6074	6.47465e-12	6.47465e-12	2.68417	0.530921
geneComp_00003173	PB.2218.3	Ppup026070_Ppup026100	0.304533	0.609067	0	-0.609067	2.19762e-10	2.19762e-10	4.46859	0
geneComp_00012567	PB.261.2	Ppup142310	0.4731	0.778	0.1682	-0.6098	2.93385e-109	2.93385e-109	4.62913	3.4351
geneComp_00001882	PB.1952.5	Ppup009800	0.312217	0.617267	0.00716667	-0.6101	1.131e-33	4.10422e-41	5.89636	0.0912002
geneComp_00007874	PB.4229.3	Ppup085770	0.402967	0.7086	0.0973333	-0.611267	1.42508e-08	1.42508e-08	6.28191	0.330165
geneComp_00012630	PB.320.16	Ppup142950	0.321517	0.627333	0.0157	-0.611633	2.5721e-31	3.68959e-34	5.3038	0.946658
geneComp_00014265	PB.4810.3	Ppup165030	0.3183	0.624167	0.0124333	-0.611733	2.86616e-25	2.02927e-36	6.54287	0.28872
geneComp_00008785	MSTRG.1618.3	Ppup096870	0.372633	0.6788	0.0664667	-0.612333	0.00045284	0.00045284	3.40155	0
geneComp_00001011	PB.8364.17	novelGenePB.8364	0.692517	1	0.385033	-0.614967	1.1044e-22	5.84149e-23	1.91578	2.03227
geneComp_00008393	PB.3027.2	Ppup092600_Ppup092590	0.4635	0.771167	0.155833	-0.615333	0.0128623	0.0128623	4.83508	0
geneComp_00009365	PB.3524.1	Ppup104470	0.401133	0.709667	0.0926	-0.617067	3.02932e-66	3.02932e-66	4.34768	1.15419
geneComp_00014349	PB.4879.2	Ppup165960	0.665783	0.975967	0.3556	-0.620367	0.00411593	3.91669e-06	8.18988	0.551533
geneComp_00001730	PB.1879.110	Ppup008030_Ppup008270	0.31245	0.6249	0	-0.6249	1.09975e-26	8.42689e-36	3.8814	0
geneComp_00005330	PB.5330.6	Ppup052540	0.32465	0.637767	0.0115333	-0.626233	3.5876e-06	3.05998e-07	4.3417	0
geneComp_00004207	PB.3287.15	Ppup039040_Ppup039030	0.486717	0.800667	0.172767	-0.6279	0.0163177	0.0163177	4.05908	0
geneComp_00005694	MSTRG.9878.1	Ppup057320	0.31545	0.6309	0	-0.6309	5.96154e-20	5.86757e-20	4.17873	0
geneComp_00009404	PB.3561.4	Ppup104870	0.3158	0.6316	0	-0.6316	2.78891e-15	6.02922e-17	2.00461	0
geneComp_00010070	PB.1087.1	Ppup112530	0.404083	0.7201	0.0880667	-0.632033	1.31099e-47	3.86641e-138	6.29705	1.1703
geneComp_00009781	PB.8045.2	Ppup109350	0.316667	0.633333	0	-0.633333	1.19879e-19	1.19879e-19	3.9658	0
geneComp_00000492	PB.1973.1	novelGenePB.1973	0.57465	0.893433	0.255867	-0.637567	0.0262864	0.0262864	6.4663	0
geneComp_00005780	PB.2500.2	Ppup058260	0.319383	0.638767	0	-0.638767	1.14884e-13	2.23556e-14	2.01799	0
geneComp_00012028	PB.8068.2	Ppup136050	0.355483	0.676633	0.0343333	-0.6423	6.00649e-35	6.00649e-35	5.4421	0.108579
geneComp_00005461	PB.5431.2	Ppup053940	0.397517	0.721	0.0740333	-0.646967	3.4891e-52	6.46223e-53	4.1208	0.449104
geneComp_00013289	PB.7854.16	Ppup151280	0.343383	0.666933	0.0198333	-0.6471	1.49776e-30	1.49776e-30	4.83832	0
geneComp_00005916	PB.2592.5	Ppup059740	0.438117	0.7617	0.114533	-0.647167	1.23413e-36	1.23413e-36	5.71819	0.444249
geneComp_00007009	PB.6677.3	Ppup074950	0.582583	0.9064	0.258767	-0.647633	1.78423e-73	2.50517e-206	6.52462	8.74147
geneComp_00008435	PB.3057.1	Ppup093070	0.512683	0.836933	0.188433	-0.6485	7.81783e-07	3.60244e-16	2.42375	1.06602
geneComp_00014329	MSTRG.5543.2	Ppup165760	0.602083	0.926333	0.277833	-0.6485	0.00040202	0.000382264	2.97566	3.55129
geneComp_00008682	PB.3232.3	Ppup095750	0.39435	0.7188	0.0699	-0.6489	8.7737e-05	7.57659e-17	4.41598	0.788601
geneComp_00012115	PB.6080.2	Ppup137260	0.424383	0.7489	0.0998667	-0.649033	1.702e-10	1.16564e-11	1.41967	0.30001
geneComp_00006940	PB.6313.1	Ppup074160	0.388433	0.7132	0.0636667	-0.649533	5.29542e-26	2.97377e-26	5.26944	1.42204
geneComp_00001273	PB.5191.3	Ppup003100	0.347883	0.6731	0.0226667	-0.650433	3.30926e-48	4.38949e-49	5.15999	0.363726
geneComp_00011190	PB.1551.12	Ppup125740	0.492717	0.818567	0.166867	-0.6517	5.56281e-58	5.56281e-58	8.04593	1.02924
geneComp_00009356	PB.3521.1	Ppup104390	0.36455	0.690833	0.0382667	-0.652567	2.16514e-54	4.52106e-55	5.3626	0.869324
geneComp_00009323	PB.3499.9	Ppup104060	0.626767	0.9541	0.299433	-0.654667	4.63375e-70	5.10579e-86	9.90544	6.06133
geneComp_00001736	PB.1879.161	Ppup008030_Ppup008350	0.327483	0.654967	0	-0.654967	8.32095e-30	8.32095e-30	4.18751	0
geneComp_00003358	PB.2361.26	Ppup028060	0.486167	0.815433	0.1569	-0.658533	1.03977e-123	1.03977e-123	7.02617	4.89319
geneComp_00002682	PB.5779.2	Ppup020290	0.352467	0.681833	0.0231	-0.658733	8.09789e-24	8.09789e-24	1.91522	0.11591
geneComp_00011279	PB.1614.3	Ppup126670	0.5056	0.8357	0.1755	-0.6602	0.0111656	0.0111656	4.66499	0
geneComp_00002690	PB.5784.19	Ppup020370	0.5054	0.837767	0.173033	-0.664733	0.00846792	0.000239416	4.20849	0.690631
geneComp_00010442	PB.6035.1	Ppup116790	0.495567	0.8302	0.160933	-0.669267	0.0141819	2.06212e-48	5.1462	1.44071
geneComp_00003333	PB.2340.5	Ppup027810	0.335017	0.670033	0	-0.670033	1.85004e-132	1.85004e-132	7.68442	0
geneComp_00000084	PB.947.3	novelGeneAS085	0.613633	0.9495	0.277767	-0.671733	4.22579e-07	1.09173e-30	3.59469	7.12261
geneComp_00008742	PB.6803.7	Ppup096410	0.341017	0.678533	0.0035	-0.675033	0.000100505	0.000100505	1.15741	0.870641
geneComp_00007698	PB.4107.1	Ppup083820	0.46315	0.8008	0.1255	-0.6753	3.5112e-32	3.5112e-32	4.54316	0.351883
geneComp_00005731	PB.2458.13	Ppup057750	0.33935	0.6787	0	-0.6787	2.61516e-69	2.96235e-104	8.18636	0
geneComp_00007126	PB.6770.2	Ppup076120	0.441633	0.781167	0.1021	-0.679067	3.81828e-24	2.17738e-24	4.45431	0.853502
geneComp_00012651	PB.343.4	Ppup143210	0.533617	0.8732	0.194033	-0.679167	7.76203e-17	7.76203e-17	4.35484	0.699489
geneComp_00001363	PB.5258.13	Ppup004010_Ppup004020	0.339833	0.679667	0	-0.679667	5.3653e-34	5.3653e-34	4.41252	0
geneComp_00002621	PB.5731.1	Ppup019680	0.582083	0.922333	0.241833	-0.6805	3.93035e-43	2.61035e-43	5.3184	3.66572
geneComp_00004407	PB.3435.1	Ppup041250	0.387467	0.728067	0.0468667	-0.6812	1.6131e-32	1.36347e-32	7.10407	1.64032
geneComp_00008657	PB.3213.4	Ppup095480	0.579183	0.920133	0.238233	-0.6819	5.71649e-19	5.71649e-19	4.78454	3.97208
geneComp_00009026	PB.8205.8	Ppup099850_Ppup099840	0.3415	0.683	0	-0.683	2.7471e-19	2.7471e-19	5.59475	0
geneComp_00014677	PB.5108.2	Ppup169580	0.6351	0.9769	0.2933	-0.6836	0.0083106	0.0083106	8.96948	0
geneComp_00000372	MSTRG.7920.1	novelGeneMSTRG.7920	0.387467	0.7294	0.0455333	-0.683867	1.14562e-27	1.14562e-27	3.48013	0.103287
geneComp_00010922	PB.1376.123	Ppup123000	0.46	0.802167	0.117833	-0.684333	1.82398e-39	1.82398e-39	6.19904	0.887716
geneComp_00012449	PB.177.3	Ppup141120	0.455583	0.7979	0.113267	-0.684633	7.91574e-09	1.47946e-13	4.98121	0.21648
geneComp_00008214	PB.2895.2	Ppup090780	0.5996	0.943067	0.256133	-0.686933	5.63554e-17	1.40247e-17	4.91401	1.53654
geneComp_00005052	PB.4661.3	Ppup049080	0.413133	0.756667	0.0696	-0.687067	4.92719e-19	4.92719e-19	5.99348	0
geneComp_00005110	PB.4703.8	Ppup049720	0.416533	0.764833	0.0682333	-0.6966	7.54765e-44	7.54765e-44	5.55631	0.275013
geneComp_00011036	PB.1416.1	Ppup124190	0.358367	0.707833	0.0089	-0.698933	4.94919e-107	4.94919e-107	4.72553	0.509844
geneComp_00009918	PB.963.2	Ppup110910	0.355417	0.710833	0	-0.710833	1.86066e-23	1.86066e-23	3.6526	0
geneComp_00003667	PB.7274.1	Ppup031830	0.62825	0.986033	0.270467	-0.715567	0.000784612	0.000784612	7.55623	0
geneComp_00001752	PB.1879.270	Ppup008030_Ppup008580	0.485633	0.844433	0.126833	-0.7176	0.000159421	1.04479e-07	4.31009	0.483654
geneComp_00003133	PB.2187.3	Ppup025660	0.407183	0.768	0.0463667	-0.721633	1.65216e-27	1.24251e-100	4.94767	0.599649
geneComp_00010637	PB.3882.1	Ppup119540	0.571433	0.934667	0.2082	-0.726467	8.23625e-15	8.23625e-15	3.37846	0.61728
geneComp_00004049	PB.6398.1	Ppup037010	0.516167	0.8844	0.147933	-0.736467	4.17647e-110	4.17647e-110	6.60141	2.25177
geneComp_00014096	PB.7498.9	Ppup162780	0.468133	0.838467	0.0978	-0.740667	1.56156e-18	2.89636e-40	7.80332	2.4174
geneComp_00000467	PB.1810.7	novelGenePB.1810	0.372267	0.743333	0.0012	-0.742133	2.3522e-09	0	6.06383	0.0246402
geneComp_00007953	PB.7658.1	Ppup086570	0.529017	0.901467	0.156567	-0.7449	1.382e-75	1.382e-75	6.01894	0.687226
geneComp_00007245	PB.7115.1	Ppup077530	0.50955	0.882467	0.136633	-0.745833	1.72533e-33	5.41189e-73	5.24681	2.9896
geneComp_00013276	PB.7847.1	Ppup151120	0.439167	0.812767	0.0655667	-0.7472	2.16654e-41	2.16654e-41	4.25547	0.298126
geneComp_00014537	PB.5016.2	Ppup167970	0.506483	0.881233	0.131733	-0.7495	1.95435e-45	1.95435e-45	3.2951	0.589012
geneComp_00008480	PB.3097.1	Ppup093530	0.617133	0.992233	0.242033	-0.7502	6.74644e-102	8.93087e-146	7.70488	2.72504
geneComp_00000013	PB.377.1	novelGeneAS014	0.417967	0.7975	0.0384333	-0.759067	2.25807e-13	2.00206e-13	3.3024	4.72022
geneComp_00010891	PB.1337.1	Ppup122680	0.382083	0.764167	0	-0.764167	2.80147e-14	2.80147e-14	3.01274	0
geneComp_00012545	PB.244.69	Ppup142060_Ppup142070	0.611767	0.995167	0.228367	-0.7668	9.32067e-26	3.96351e-66	6.49411	1.16709
geneComp_00000921	PB.731.18	novelGenePB.731	0.479717	0.863533	0.0959	-0.767633	3.64545e-23	3.64545e-23	8.79344	1.4293
geneComp_00008861	PB.6955.1	Ppup097770	0.410867	0.795133	0.0266	-0.768533	3.36158e-29	3.36158e-29	5.24046	0.0592764
geneComp_00008385	MSTRG.11062.1	Ppup092530	0.554417	0.939133	0.1697	-0.769433	0.00205885	0.000168261	4.41629	0
geneComp_00013908	PB.7360.3	Ppup160640	0.5683	0.955467	0.181133	-0.774333	1.42328e-21	2.06426e-47	5.02143	2.21054
geneComp_00001773	PB.1879.272	Ppup008530_Ppup008030	0.387233	0.774467	0	-0.774467	0.00443346	0.00443346	4.1396	0
geneComp_00008261	PB.2932.4	Ppup091240	0.48195	0.870733	0.0931667	-0.777567	5.1873e-30	5.1873e-30	8.26593	1.69204
geneComp_00001998	PB.2036.1	Ppup011040	0.3909	0.78	0.0018	-0.7782	4.80202e-25	3.81892e-25	7.08775	0.409999
geneComp_00001521	PB.1732.1	Ppup006000_Ppup006010	0.390533	0.781067	0	-0.781067	7.29112e-76	7.29112e-76	6.25093	0
geneComp_00011214	PB.1571.1	Ppup125990	0.501367	0.8945	0.108233	-0.786267	1.37391e-42	1.0057e-42	6.16558	2.24811
geneComp_00006617	PB.7041.1	Ppup069520	0.42125	0.8162	0.0263	-0.7899	3.22411e-65	6.35901e-89	5.02355	0.395612
geneComp_00012034	PB.8073.2	Ppup136110	0.432217	0.8384	0.0260333	-0.812367	1.62428e-38	1.62428e-38	4.73965	0.949926
geneComp_00000327	MSTRG.4186.2	novelGeneMSTRG.4186	0.45835	0.866367	0.0503333	-0.816033	1.71342e-11	6.40092e-12	2.07777	0.0688084
geneComp_00014588	PB.5044.1	Ppup168530	0.483883	0.8927	0.0750667	-0.817633	4.14311e-48	2.93714e-48	6.54931	2.19344
geneComp_00001287	PB.5206.3	Ppup003240	0.53785	0.948533	0.127167	-0.821367	7.20328e-70	7.20328e-70	7.44805	6.52123
geneComp_00011234	PB.1584.2	Ppup126200	0.583867	1	0.167733	-0.832267	4.52195e-05	4.45772e-05	5.40904	2.4612
geneComp_00005897	PB.2581.1	Ppup059510	0.42015	0.838233	0.00206667	-0.836167	6.40047e-06	5.85291e-06	3.01241	3.36733
geneComp_00007241	PB.7110.1	Ppup077490	0.4193	0.838433	0.000166667	-0.838267	7.02899e-28	2.02353e-35	1.75905	0.0405067
geneComp_00009866	PB.922.3	Ppup110320	0.424733	0.849467	0	-0.849467	1.6836e-82	1.6836e-82	5.76345	0
geneComp_00001409	PB.5296.2	Ppup004470	0.425783	0.851567	0	-0.851567	1.68372e-16	4.05048e-17	3.00473	0
geneComp_00009496	PB.3635.72	Ppup105880	0.52005	0.946533	0.0935667	-0.852967	1.13994e-11	7.81996e-12	3.81219	0.730045
geneComp_00005955	PB.2614.1	Ppup060170	0.534617	0.967367	0.101867	-0.8655	1.07914e-179	1.10053e-180	3.55505	4.43557
geneComp_00009755	PB.8021.3	Ppup109070	0.5515	0.989733	0.113267	-0.876467	1.2257e-45	4.4021e-152	4.16251	3.69535
geneComp_00003942	PB.6201.1	Ppup035750	0.48475	0.925533	0.0439667	-0.881567	9.6362e-11	1.6419e-33	9.56293	0.517538
geneComp_00007611	PB.4050.13	Ppup082890	0.442933	0.885867	0	-0.885867	7.96163e-59	7.96163e-59	5.35134	0
geneComp_00002713	PB.5804.1	Ppup020600	0.450567	0.899467	0.00166667	-0.8978	2.16874e-05	1.48748e-05	3.63345	0
geneComp_00006890	PB.6240.1	Ppup073340	0.455217	0.905167	0.00526667	-0.8999	2.37804e-12	3.79226e-76	5.15015	0
geneComp_00001243	PB.5163.1	Ppup002810	0.45325	0.905333	0.00116667	-0.904167	2.14308e-16	7.01598e-44	6.49463	3.53868
geneComp_00000895	PB.7086.9	novelGenePB.7086	0.492583	0.946533	0.0386333	-0.9079	3.27143e-105	1.69007e-105	6.97709	1.44111
geneComp_00008723	MSTRG.11371.1	Ppup096140_Ppup096150	0.542567	0.998367	0.0867667	-0.9116	2.35284e-09	2.35284e-09	4.26505	0.327697
geneComp_00006272	PB.3823.2	Ppup064390_Ppup064360	0.4598	0.9196	0	-0.9196	3.98604e-30	3.98604e-30	6.15096	0
geneComp_00001851	PB.1930.3	Ppup009440	0.515083	0.978367	0.0518	-0.926567	1.78101e-260	5.50239e-261	7.26089	2.26575
geneComp_00003735	PB.8098.1	Ppup033060	0.502433	0.9697	0.0351667	-0.934533	9.05671e-44	9.05671e-44	5.2751	0.0412963
geneComp_00003882	PB.6156.11	Ppup035100	0.503283	0.971233	0.0353333	-0.9359	4.38737e-16	4.51227e-201	5.75097	4.54225
geneComp_00000148	PB.1462.1	novelGeneAS150	0.47085	0.940933	0.000766667	-0.940167	2.16874e-19	1.82929e-19	6.29506	2.12183
geneComp_00005728	PB.2454.12	Ppup057710	0.474467	0.947433	0.0015	-0.945933	1.47516e-12	9.20726e-13	4.75542	1.23058
geneComp_00002293	PB.7156.1	Ppup015700_Ppup015670	0.49195	0.978167	0.00573333	-0.972433	4.28772e-08	9.92025e-09	2.11622	0
geneComp_00004121	MSTRG.10832.1	Ppup037970	0.502817	0.989933	0.0157	-0.974233	4.21982e-52	1.95876e-88	4.29446	1.1017
geneComp_00001725	PB.1879.93	Ppup008030_Ppup008170	0.5	1	0	-1	1.5389e-14	1.5389e-14	2.91448	0
geneComp_00001726	PB.1879.130	Ppup008030_Ppup008190	0.5	1	0	-1	3.18841e-14	3.18841e-14	2.94708	0
geneComp_00001733	PB.1879.87	Ppup008030_Ppup008300	0.5	1	0	-1	1.10054e-18	1.10054e-18	3.36768	0
geneComp_00001734	PB.1879.134	Ppup008030_Ppup008310	0.5	1	0	-1	1.86447e-22	1.86447e-22	4.24712	0
geneComp_00001760	PB.1879.38	Ppup008230_Ppup008030	0.5	1	0	-1	9.07944e-16	9.07944e-16	3.07168	0
geneComp_00001766	PB.1879.79	Ppup008350_Ppup008030	0.5	1	0	-1	6.54959e-18	6.54959e-18	3.39733	0
