# Supplementary material for: Comprehensive isoform-level analysis reveals the contribution of alternative isoforms to venom evolution and repertoire diversity
Source: HighWire-hosted journal article supplement (doi:10.1101/gr.277707.123), 2023-09-01
Supplement: Supplemental_Tables_S1_to_S19.zip [file Supplemental_Table_S16.xlsx]

## Sheet: Sheet1
Supplemental Table S16. Seven venom genes with significantly increased isoform usage in the venom gland.
isoform_id	gene_id	IF_overall	IF1	IF2	dIF	isoform_switch_q_value	gene_switch_q_value	log2medCarcass	log2medVenom
PB.2454.3	Ppup057710	0.492117	0.0432333	0.941	0.897767	9.21e-13	9.21e-13	1.02633	9.75481
PB.7110.3	Ppup077490	0.5623	0.126933	0.997667	0.870733	2.02e-35	2.02e-35	0.283381	7.41939
PB.6156.5	Ppup035100	0.396767	0	0.793533	0.793533	4.51e-201	4.51e-201	0	8.93336
PB.2036.2	Ppup011040	0.6091	0.22	0.9982	0.7782	3.82e-25	3.82e-25	5.21462	8.60948
PB.2988.1	Ppup092220	0.297967	0.00346667	0.592467	0.589	4.91e-07	4.91e-07	0	7.04631
PB.5206.6	Ppup003240	0.2539	0.00246667	0.505333	0.502867	5.26e-06	7.2e-70	0	8.7252
PB.2583.1	novelGenePB.2583	0.322167	0.0726667	0.571667	0.499	8.42e-15	8.42e-15	3.33155	8.49216
PB.2583.2	novelGenePB.2583	0.677833	0.927333	0.428333	-0.499	8.44e-15	8.42e-15	6.46923	8.2411
PB.2988.2	Ppup092220	0.6953	0.995367	0.395233	-0.600133	4.93e-07	4.91e-07	6.11979	6.43666
PB.2036.1	Ppup011040	0.3909	0.78	0.0018	-0.7782	4.8e-25	3.82e-25	7.08775	0.409999
PB.5206.3	Ppup003240	0.53785	0.948533	0.127167	-0.821367	7.2e-70	7.2e-70	7.44805	6.52123
PB.7110.1	Ppup077490	0.4193	0.838433	0.000166667	-0.838267	7.03e-28	2.02e-35	1.75905	0.0405067
PB.6156.11	Ppup035100	0.503283	0.971233	0.0353333	-0.9359	4.39e-16	4.51e-201	5.75097	4.54225
PB.2454.12	Ppup057710	0.474467	0.947433	0.0015	-0.945933	1.48e-12	9.21e-13	4.75542	1.23058
