# Supplementary material for: Comprehensive isoform-level analysis reveals the contribution of alternative isoforms to venom evolution and repertoire diversity
Source: HighWire-hosted journal article supplement (doi:10.1101/gr.277707.123), 2023-09-01
Supplement: Supplemental_Tables_S1_to_S19.zip [file Supplemental_Table_S17.xlsx]

## Sheet: Sheet1
Supplemental Table S17. Isoform expression (TPM) and isoform fraction of the Serpin 3 genes among 13 species.
Species	Two serpin isoform	serpin-C isoform	serpin-N isoform	isoform fraction of Two serpin isoform	isoform fraction of serpin-C isoform
Ppup	0.33	389.581	0	0.000846346	0.999154
Pven	0.672183	153.545	0	0.00435867	0.995641
Pqin	0	1552.69	0	0	1
Nvit	5.80094	199.236	0	0.0282921	0.971708
Acal	11.27	17.0984	1.25629	0.380426	0.577167
Pvin	4.47489	6.55612	0	0.405665	0.594335
Ajap	2.66335	415.896	0	0.00636314	0.993637
Tele	52.418	26.4394	0	0.664719	0.335281
Hheb	96.4949	7.35825	0	0.929148	0.0708525
Dcol	0.080148	0.187793	0	0.299126	0.700874
Acom	0.0509	0.001689	0.527011	0.0878192	0.00291408
Vman	41.9548	96.8582	0	0.30224	0.69776
Gfla	7.849	0.062004	20.5	0.276266	0.00218239
