# Supplementary material for: Comprehensive isoform-level analysis reveals the contribution of alternative isoforms to venom evolution and repertoire diversity
Source: HighWire-hosted journal article supplement (doi:10.1101/gr.277707.123), 2023-09-01
Supplement: Supplemental_Tables_S1_to_S19.zip [file Supplemental_Table_S18.xlsx]

## Sheet: Sheet1
Supplemental Table S18. List of the 51 hymenopterans used for evolutionary analysis of serpin gene in this study.
Number	hymenopteran insect list
1	Dufourea novaeangliae
2	Megachile rotundata
3	Habropoda laboriosa
4	Eufriesea mexicana
5	Bombus terrestris
6	Vespa mandarinia
7	Polistes dominula
8	Polistes canadensis
9	Ampulex compressa
10	Odontomachus monticola
11	Harpegnathos saltator
12	Camponotus floridanus
13	Formica exsecta
14	Ooceraea biroi
15	Linepithema humile
16	Solenopsis invicta
17	Pogonomyrmex barbatus
18	Pogonomyrmex barbatus
19	Atta cephalotes
20	Gonatopus flavifemur
21	Diadromus collaris
22	Lysiphlebus Fabarum
23	Aphidius ervi
24	Aphidius gifuensis
25	Habrobracon Hebetor
26	Fopius arisanus
27	Diachasma alloeum
28	Macrocentrus cingulum
29	Chelonus insularis
30	Cotesia vestalis
31	Microplitis demolitor
32	Cephus cinctus
33	Neodiprion lecontei
34	Athalia rosae
35	Belonocnema treatae
36	Leptopilina boulardi
37	Trichogramma pretiosum
38	Camponotus floridanus
39	Theocolax elegans
40	Anastatus japonicus
41	Ceratosolen solmsi
42	Pachycrepoideus vindemmiae
43	Trichomalopsis sarcophagae
44	Nasonia giraulti
45	Nasonia vitripennis
46	Anisopteromalus calandrae
47	Pteromalus qinghaiensis
48	Pteromalus venustus
49	Pteromalus puparum
50	Cotesia chilonis
51	Orussus abietinus
