# Supplementary material for: Comprehensive isoform-level analysis reveals the contribution of alternative isoforms to venom evolution and repertoire diversity
Source: HighWire-hosted journal article supplement (doi:10.1101/gr.277707.123), 2023-09-01
Supplement: Supplemental_Tables_S1_to_S19.zip [file Supplemental_Table_S19.xlsx]

## Sheet: Sheet1
Supplemental_Table_S19. List of the 20 hymenopterans used for whole genome alignment analyses.
Number	Hymenopteran insect list
1	Nasonia vitripennis
2	Anisopteromalus calandrae
3	Pteromalus qinghaiensis
4	Pteromalus venustus
5	Pteromalus puparum
6	Cotesia chilonis
7	Orussus abietinus
8	Polistes dominula
9	Ooceraea biroi
10	Cephus cinctus
11	Athalia rosae
12	Trichogramma pretiosum
13	Camponotus floridanus
14	Theocolax elegans
15	Ceratosolen solmsi
16	Pachycrepoideus vindemmiae
17	Gonatopus flavifemur
18	Diadromus collaris
19	Habrobracon Hebetor
20	Belonocnema treatae
